# Supplementary material for: Divergent cyclization of 2-(5-iodo-1,2,3-triazolyl)benzamides toward triazole-fused lactams and cyclic imidates
Source: Royal Society of Chemistry journal article supplement (doi:10.1039/d3nj01264f), 2023-01-01
Supplement: d3nj01264f1.pdf [file d3nj01264f1.pdf]

Supporting Information

**Divergent Cyclization of 2-(5-Iodo-1,2,3-triazolyl)benzamides  
toward Triazole-Fused Lactams and Cyclic Imidates**

Yury N. Kotovshchikov,\* Stepan S. Tatevosyan, Gennadij V. Latyshev,\*  
Zoya R. Kugusheva, Nikolay V. Lukashev, and Irina P. Beletskaya

Chemistry Department, M. V. Lomonosov Moscow State University,  
1/3 Leninskiye Gory, Moscow 119991, Russia.

E-mail: kotovshchikov@org.chem.msu.ru, latyshev@org.chem.msu.ru

**Table of Contents**

|                                                                       |      |
|-----------------------------------------------------------------------|------|
| General information .....                                             | S2   |
| Experimental procedures and characterization data for compounds ..... | S3   |
| Details of X-ray diffraction measurements .....                       | S33  |
| Details of DFT calculations .....                                     | S34  |
| UV-vis and fluorescence spectra .....                                 | S57  |
| Copies of IR spectra .....                                            | S58  |
| Copies of NMR spectra.....                                            | S63  |
| References .....                                                      | S222 |

## General information

NMR spectra were recorded with Bruker Avance 400, Agilent 400MR ( $^1\text{H}$  400 MHz,  $^{13}\text{C}$  100 MHz), and Bruker Avance 600 ( $^1\text{H}$  600 MHz,  $^{13}\text{C}$  151 MHz) spectrometers at ambient temperature. Chemical shifts are presented in ppm ( $\delta$  scale) and referenced to hexamethyldisiloxane (HMDS,  $\delta = 0.05$  ppm) or tetramethylsilane (TMS,  $\delta = 0$  ppm) in the  $^1\text{H}$  NMR spectra and to the solvent signal in the  $^{13}\text{C}$  NMR spectra. UV-vis spectra were recorded in solutions using a Hitachi U-2900 UV-vis spectrometer in a quartz cuvette (Hellma,  $l = 1$  cm). Emission spectra were measured using a Horiba Jobin Yvon Fluoromax-2 spectrometer in a quartz cuvette (Hellma,  $l = 1$  cm). IR spectra were recorded with a Thermo Nicolet 200 FT-IR instrument in KBr pellets. IR bands in  $2365\text{--}2340\text{ cm}^{-1}$  range belong to atmospheric  $\text{CO}_2$ . MALDI-TOF spectra were recorded with a Bruker Daltonics UltraFlex instrument in a dithranol matrix using PEG 300, PEG 400 or PEG 600 as the internal standard. ESI mass spectra were obtained from Thermo Scientific LTQ Orbitrap and Sciex TripleTOF 5600+ spectrometers. Elemental analyses were performed with an Elementar Vario MICRO cube apparatus. Column chromatography was carried out on Macherey-Nagel silica gel 60 (0.040–0.063 mm).

## Experimental procedures and characterization data for compounds

### General scheme for the synthesis of starting compounds

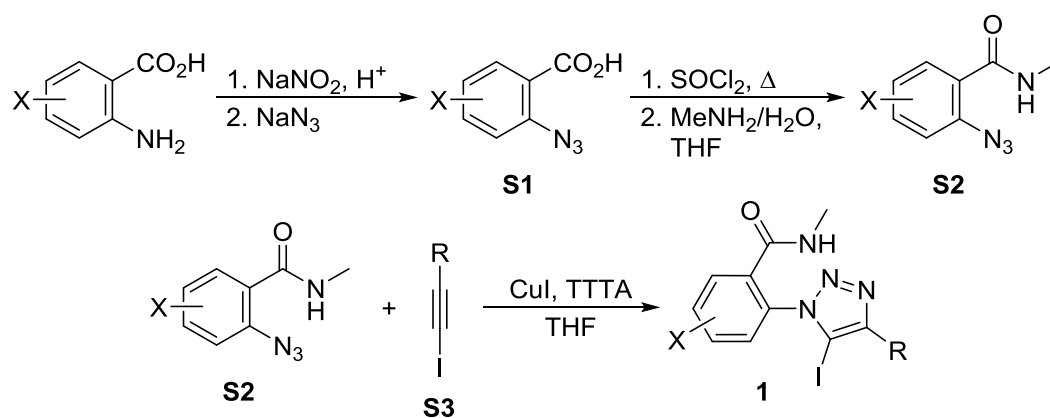

2-Azidobenzoic acids **S1a-f** were prepared from the corresponding commercially available anthranilic acids by the standard diazotization/azidation protocol according to the reported procedures.

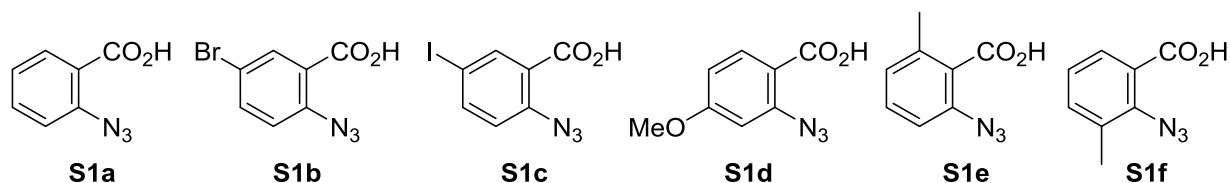

1-Iodoalkynes **S3a-i** were prepared from the corresponding terminal acetylenes by a modified literature procedure<sup>1</sup> (treatment with  $\text{I}_2$  in the methanol solution in the presence of 3 equiv of  $\text{MeONa}$ ). Iodide **S3j** was prepared using *N*-iodosuccinimide/ $\text{AgNO}_3$  halogenation system according to a general literature procedure.<sup>2</sup>

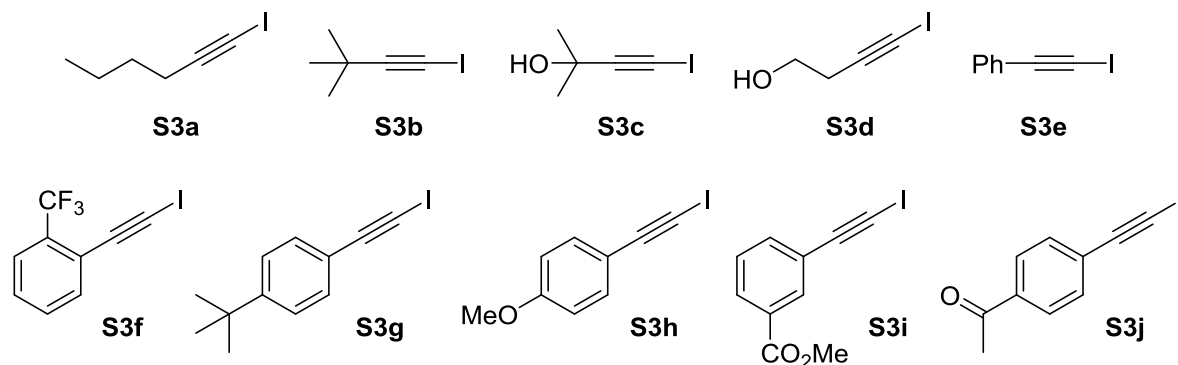

## Synthesis of 2-azido-*N*-methylbenzamides **S2**

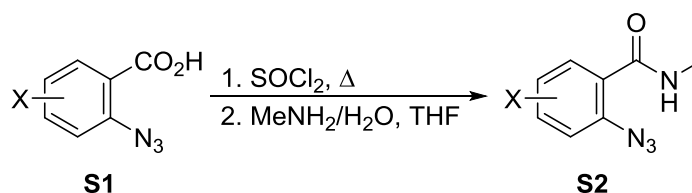

**General procedure 1 (GP1).** The mixture of 2-azidobenzoic acid **S1** (6.0 mmol, 1 equiv) and  $\text{SOCl}_2$  (3 mL) was refluxed for 1 h. Then the excess  $\text{SOCl}_2$  was evaporated *in vacuo* and the residue was dissolved in THF (12 mL). The obtained mixture was cooled in an ice bath and 40% solution of  $\text{MeNH}_2$  in water (1.55 mL, 18.0 mmol, 3 equiv) was added dropwise. After stirring at ambient temperature overnight, the mixture was diluted with  $\text{CH}_2\text{Cl}_2$  (50 mL) and washed with water (60 mL). The organic layer was dried with anhydrous  $\text{Na}_2\text{SO}_4$ , and the solvents were evaporated *in vacuo*. The crude product was purified by column chromatography.

### 2-Azido-*N*-methylbenzamide (**S2a**)

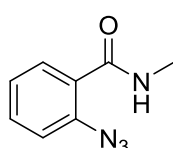

Prepared from **S1a** (2.445 g, 15.0 mmol) according to **GP1**; eluent:  $\text{CH}_2\text{Cl}_2$ – $\text{MeOH} = 50:1$ . Yield 2.571 g (97%). White solid; mp 97–98 °C (lit.<sup>3</sup> 95–97 °C).

$^1\text{H}$  NMR (400 MHz,  $\text{CDCl}_3$ )  $\delta$  8.10 (dd,  $J = 7.9, 1.7$  Hz, 1H), 7.55–7.40 (m, 2H), 7.23–7.12 (m, 2H), 2.98 (d,  $J = 4.8$  Hz, 3H).

$^{13}\text{C}\{^1\text{H}\}$  NMR (100 MHz,  $\text{CDCl}_3$ )  $\delta$  165.2 ( $\text{C}_{\text{quat}}$ ), 136.7 ( $\text{C}_{\text{quat}}$ ), 132.1, 132.0, 125.04, 124.98 ( $\text{C}_{\text{quat}}$ ), 118.3, 26.7.

### 2-Azido-5-bromo-*N*-methylbenzamide (**S2b**)

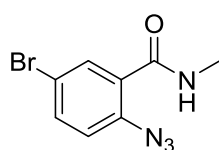

Prepared from **S1b** (363 mg, 1.5 mmol) according to **GP1**; eluent: hexanes– $\text{EtOAc} = 2:1$ . Yield 298 mg (78%). Beige solid; mp 130–132 °C.

$^1\text{H}$  NMR (400 MHz,  $\text{CDCl}_3$ )  $\delta$  8.26 (d,  $J = 2.4$  Hz, 1H), 7.58 (dd,  $J = 8.5, 2.4$  Hz, 1H), 7.48 (br s, 1H), 7.06 (d,  $J = 8.5$  Hz, 1H), 3.01 (d,  $J = 4.8$  Hz, 3H).

$^{13}\text{C}\{^1\text{H}\}$  NMR (100 MHz,  $\text{CDCl}_3$ )  $\delta$  163.8 ( $\text{C}_{\text{quat}}$ ), 135.9 ( $\text{C}_{\text{quat}}$ ), 134.9 (2C), 126.4 ( $\text{C}_{\text{quat}}$ ), 120.0, 118.3 ( $\text{C}_{\text{quat}}$ ), 26.9.

HRMS (MALDI-TOF) calcd for  $\text{C}_8\text{H}_8^{81}\text{BrN}_2\text{O}$  [ $\text{M}-\text{N}_2+\text{H}$ ]<sup>+</sup> 228.9794; found 228.9795.

### 2-Azido-5-iodo-*N*-methylbenzamide (**S2c**)

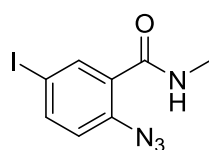

Prepared from **S1c** (578 mg, 2.0 mmol) according to **GP1**; eluent: hexanes– $\text{EtOAc} = 3:1$  and  $2:1$ . Yield 510 mg (84%). Beige solid; mp 106–108 °C.

$^1\text{H}$  NMR (400 MHz,  $\text{CDCl}_3$ )  $\delta$  8.47 (d,  $J = 2.2$  Hz, 1H), 7.78 (dd,  $J = 8.4, 2.2$  Hz, 1H), 7.41 (br s, 1H), 6.95 (d,  $J = 8.4$  Hz, 1H), 3.02 (d,  $J = 4.8$  Hz, 3H).

$^{13}\text{C}\{^1\text{H}\}$  NMR (100 MHz,  $\text{CDCl}_3$ )  $\delta$  163.7 ( $\text{C}_{\text{quat}}$ ), 140.8 (2C), 136.7 ( $\text{C}_{\text{quat}}$ ), 126.5 ( $\text{C}_{\text{quat}}$ ), 120.2, 88.6 ( $\text{C}_{\text{quat}}$ ), 26.9.

HRMS (MALDI-TOF) calcd for  $\text{C}_8\text{H}_8\text{IN}_2\text{O}$  [ $\text{M}-\text{N}_2+\text{H}$ ] $^+$  274.9676; found 274.9680.

### 2-Azido-4-methoxy-N-methylbenzamide (S2d)

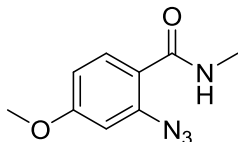

Prepared from **S1d** (57.9 mg, 0.3 mmol) according to **GPI**; eluent:  $\text{CH}_2\text{Cl}_2$ -EtOAc = 1:1. Yield 56.1 mg (91%). Beige solid; mp 91–93 °C.

$^1\text{H}$  NMR (400 MHz,  $\text{CDCl}_3$ )  $\delta$  8.18 (d,  $J$  = 8.8 Hz, 1H), 7.48 (br s, 1H), 6.77 (dd,  $J$  = 8.8, 2.4 Hz, 1H), 6.66 (d,  $J$  = 2.4 Hz, 1H), 3.87 (s, 3H), 3.01 (d,  $J$  = 4.8 Hz, 3H).

$^{13}\text{C}\{^1\text{H}\}$  NMR (100 MHz,  $\text{CDCl}_3$ )  $\delta$  164.9 ( $\text{C}_{\text{quat}}$ ), 162.4 ( $\text{C}_{\text{quat}}$ ), 138.1 ( $\text{C}_{\text{quat}}$ ), 133.9, 117.6 ( $\text{C}_{\text{quat}}$ ), 110.2, 104.0, 55.5, 26.6.

HRMS (MALDI-TOF) calcd for  $\text{C}_9\text{H}_{11}\text{N}_4\text{O}_2$  [ $\text{M}+\text{H}$ ] $^+$  207.0877; found 207.0874.

### 2-Azido-N,6-dimethylbenzamide (S2e)

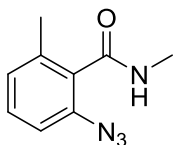

Prepared from **S1e** (200 mg, 1.13 mmol) according to **GPI**; eluent: hexanes-EtOAc = 1:1. Yield 196 mg (91%). Pale yellow solid; mp 153–155 °C.

$^1\text{H}$  NMR (400 MHz,  $\text{CDCl}_3$ )  $\delta$  7.28 (m, 1H), 7.01–6.95 (m, 2H), 5.86 (br s, 1H), 2.99 (d,  $J$  = 4.9 Hz, 3H), 2.30 (s, 3H).

$^{13}\text{C}\{^1\text{H}\}$  NMR (100 MHz,  $\text{CDCl}_3$ )  $\delta$  167.9 ( $\text{C}_{\text{quat}}$ ), 137.2 ( $\text{C}_{\text{quat}}$ ), 136.7 ( $\text{C}_{\text{quat}}$ ), 129.9, 129.2 ( $\text{C}_{\text{quat}}$ ), 126.6, 115.5, 26.5, 19.0.

HRMS (MALDI-TOF) calcd for  $\text{C}_9\text{H}_{11}\text{N}_4\text{O}$  [ $\text{M}+\text{H}$ ] $^+$  191.0927; found 191.0929.

### 2-Azido-N,3-dimethylbenzamide (S2f)

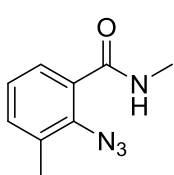

Prepared from **S1f** (354 mg, 2.0 mmol) according to **GPI**; eluent: hexanes-EtOAc = 1:1. Yield 323 mg (85%). Light brown solid; mp 73–75 °C.

$^1\text{H}$  NMR (400 MHz,  $\text{CDCl}_3$ )  $\delta$  7.52 (m, 1H), 7.24 (m, 1H), 7.11 (m, 1H), 6.81 (br s, 1H), 3.01 (d,  $J$  = 4.8 Hz, 3H), 2.37 (s, 3H).

$^{13}\text{C}\{^1\text{H}\}$  NMR (100 MHz,  $\text{CDCl}_3$ )  $\delta$  167.1 ( $\text{C}_{\text{quat}}$ ), 135.2 ( $\text{C}_{\text{quat}}$ ), 133.3, 132.6 ( $\text{C}_{\text{quat}}$ ), 129.2 ( $\text{C}_{\text{quat}}$ ), 127.7, 125.5, 26.8, 18.1.

HRMS (MALDI-TOF) calcd for  $\text{C}_9\text{H}_{11}\text{N}_2\text{O}$  [ $\text{M}-\text{N}_2+\text{H}$ ] $^+$  163.0866; found 163.0863.

## Synthesis of 2-(5-iodo-1*H*-1,2,3-triazol-1-yl)-*N*-methylbenzamides **1**

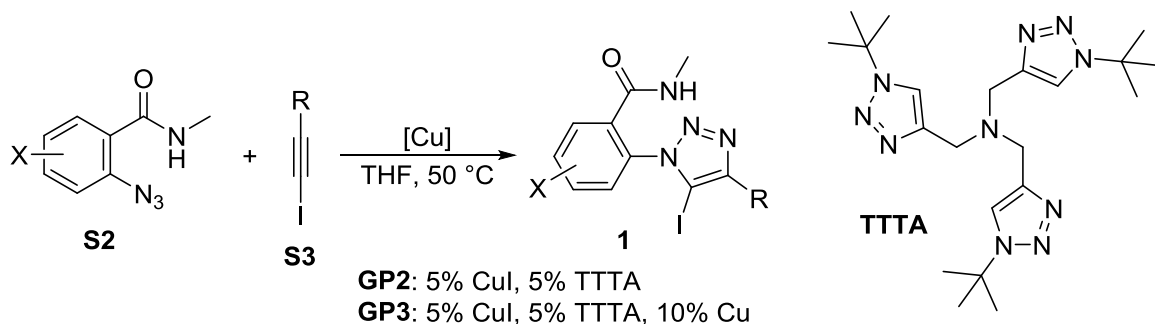

**General procedure 2 (GP2).** 2-Azido-*N*-methylbenzamide **S2** (1.5 mmol, 1 equiv), 1-iodoalkyne **S3** (1.73 mmol, 1.15 equiv), CuI (14.3 mg, 0.075 mmol, 5 mol %), and tris[(1-*tert*-butyl-1*H*-1,2,3-triazol-4-yl)methyl]amine (TTTA) (32.2 mg, 0.075 mmol, 5 mol %) were mixed under an Ar atmosphere in THF (5 mL). The reaction mixture was stirred at 50 °C in a dry block overnight or for several days (TLC control), then diluted with CH<sub>2</sub>Cl<sub>2</sub> (50 mL), washed with EDTA solution (50 mL) and water (50 mL). The organic layer was dried with anhydrous Na<sub>2</sub>SO<sub>4</sub>, and the solvents were evaporated *in vacuo*. The residue was purified by column chromatography.

**General procedure 3 (GP3).** Synthesis was performed as described for **GP2** with the catalytic system comprising CuI (5 mol %), Cu powder (10 mol %), and TTTA (5 mol %).

### 2-(4-Butyl-5-iodo-1*H*-1,2,3-triazol-1-yl)-*N*-methylbenzamide (**1a**)

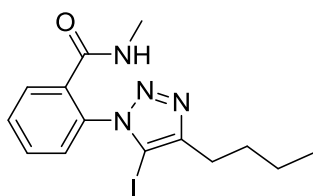

Prepared from azide **S2a** (528.6 mg, 3.0 mmol) and iodoalkyne **S3a** (469 μL, 3.45 mmol) according to **GP2** at room temperature; eluent: CH<sub>2</sub>Cl<sub>2</sub>-EtOAc = 4:1. Yield 1.116 g (97%). Light brown solid; mp 124–125 °C.

<sup>1</sup>H NMR (400 MHz, CDCl<sub>3</sub>) δ 7.87 (m, 1H), 7.68–7.60 (m, 2H), 7.34 (m, 1H), 5.80 (m, 1H), 2.75 (m, 2H), 2.72 (d, *J* = 4.9 Hz, 3H), 1.74 (m, 2H), 1.41 (m, 2H), 0.97 (t, *J* = 7.4 Hz, 3H).

<sup>13</sup>C{<sup>1</sup>H} NMR (100 MHz, CDCl<sub>3</sub>) δ 165.8 (C<sub>quat</sub>), 152.5 (C<sub>quat</sub>), 134.5 (C<sub>quat</sub>), 133.9 (C<sub>quat</sub>), 131.03, 130.97, 129.8, 128.3, 82.5 (C<sub>quat</sub>), 31.0, 26.8, 25.7, 22.1, 13.8.

HRMS (MALDI-TOF) calcd for C<sub>14</sub>H<sub>18</sub>IN<sub>4</sub>O [M+H]<sup>+</sup> 385.0520; found 385.0523.

### 5-Bromo-2-(4-butyl-5-iodo-1*H*-1,2,3-triazol-1-yl)-*N*-methylbenzamide (**1b**)

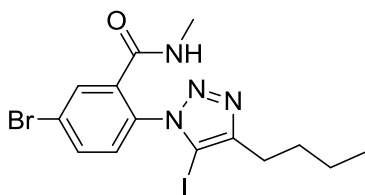

Prepared from azide **S2b** (204.1 mg, 0.8 mmol) and iodoalkyne **S3a** (119 μL, 0.88 mmol, 1.1 equiv) according to **GP3**; eluent: hexanes-EtOAc = 2:1. Yield 165 mg (45%). White solid; mp 155–157 °C.

$^1\text{H}$  NMR (400 MHz,  $\text{CDCl}_3$ )  $\delta$  7.97 (d,  $J = 2.2$  Hz, 1H), 7.74 (dd,  $J = 8.4, 2.2$  Hz, 1H), 7.21 (d,  $J = 8.4$  Hz, 1H), 6.03 (m, 1H), 2.74 (m, 2H), 2.72 (d,  $J = 4.8$  Hz, 3H), 1.73 (m, 2H), 1.40 (m, 2H), 0.97 (t,  $J = 7.4$  Hz, 3H).

$^{13}\text{C}\{^1\text{H}\}$  NMR (100 MHz,  $\text{CDCl}_3$ )  $\delta$  164.4 ( $\text{C}_{\text{quat}}$ ), 152.8 ( $\text{C}_{\text{quat}}$ ), 136.0 ( $\text{C}_{\text{quat}}$ ), 134.1, 132.9, 132.8 ( $\text{C}_{\text{quat}}$ ), 129.8, 125.2 ( $\text{C}_{\text{quat}}$ ), 82.5 ( $\text{C}_{\text{quat}}$ ), 31.0, 26.9, 25.7, 22.1, 13.8.

HRMS (MALDI-TOF) calcd for  $\text{C}_{14}\text{H}_{17}\text{BrIN}_4\text{O}$   $[\text{M}+\text{H}]^+$  462.9625; found 462.9623.

#### (4-Butyl-5-iodo-1*H*-1,2,3-triazol-1-yl)-5-iodo-*N*-methylbenzamide (1c)

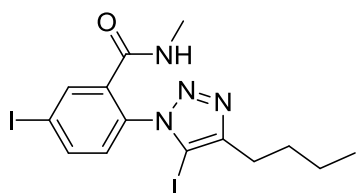

Prepared from azide **S2c** (271.9 mg, 0.9 mmol) and iodoalkyne **S3a** (134  $\mu\text{L}$ , 0.99 mmol, 1.1 equiv) according to **GP3**; eluent: hexanes–EtOAc = 2:1. Yield 262 mg (57%). Beige solid; mp 152–155  $^\circ\text{C}$ .

$^1\text{H}$  NMR (400 MHz,  $\text{CDCl}_3$ )  $\delta$  8.16 (d,  $J = 2.0$  Hz, 1H), 7.94 (dd,  $J = 8.3, 2.0$  Hz, 1H), 7.06 (d,  $J = 8.3$  Hz, 1H), 5.98 (m, 1H), 2.73 (m, 2H), 2.71 (d,  $J = 4.9$  Hz, 3H), 1.73 (m, 2H), 1.40 (m, 2H), 0.97 (t,  $J = 7.3$  Hz, 3H).

$^{13}\text{C}\{^1\text{H}\}$  NMR (100 MHz,  $\text{CDCl}_3$ )  $\delta$  164.3 ( $\text{C}_{\text{quat}}$ ), 152.8 ( $\text{C}_{\text{quat}}$ ), 140.1, 138.8, 135.9 ( $\text{C}_{\text{quat}}$ ), 133.5 ( $\text{C}_{\text{quat}}$ ), 129.8, 96.9 ( $\text{C}_{\text{quat}}$ ), 82.4 ( $\text{C}_{\text{quat}}$ ), 31.0, 26.9, 25.7, 22.1, 13.8.

HRMS (MALDI-TOF) calcd for  $\text{C}_{14}\text{H}_{17}\text{I}_2\text{N}_4\text{O}$   $[\text{M}+\text{H}]^+$  510.9486; found 510.9485.

#### 2-(4-Butyl-5-iodo-1*H*-1,2,3-triazol-1-yl)-4-methoxy-*N*-methylbenzamide (1d)

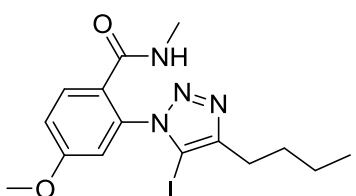

Prepared from azide **S2d** (201.1 mg, 0.975 mmol) and iodoalkyne **S3a** (146  $\mu\text{L}$ , 1.073 mmol, 1.1 equiv) according to **GP2** at room temperature; eluent: hexanes–EtOAc = 1:1. Yield 342 mg (85%). Beige solid; mp 129–131  $^\circ\text{C}$ .

$^1\text{H}$  NMR (400 MHz,  $\text{CDCl}_3$ )  $\delta$  7.82 (d,  $J = 8.7$  Hz, 1H), 7.12 (dd,  $J = 8.7, 2.5$  Hz, 1H), 6.80 (d,  $J = 2.5$  Hz, 1H), 5.72 (m, 1H), 3.88 (s, 3H), 2.74 (m, 2H), 2.68 (d,  $J = 4.8$  Hz, 3H), 1.74 (m, 2H), 1.41 (m, 2H), 0.97 (t,  $J = 7.4$  Hz, 3H).

$^{13}\text{C}\{^1\text{H}\}$  NMR (100 MHz,  $\text{CDCl}_3$ )  $\delta$  165.6 ( $\text{C}_{\text{quat}}$ ), 161.3 ( $\text{C}_{\text{quat}}$ ), 152.6 ( $\text{C}_{\text{quat}}$ ), 135.1 ( $\text{C}_{\text{quat}}$ ), 131.5, 126.4 ( $\text{C}_{\text{quat}}$ ), 116.5, 113.6, 82.6 ( $\text{C}_{\text{quat}}$ ), 55.8, 31.0, 26.8, 25.7, 22.1, 13.7.

HRMS (MALDI-TOF) calcd for  $\text{C}_{15}\text{H}_{20}\text{IN}_4\text{O}_2$   $[\text{M}+\text{H}]^+$  415.0625; found 415.0626.

#### 2-(4-Butyl-5-iodo-1*H*-1,2,3-triazol-1-yl)-*N*,6-dimethylbenzamide (1e)

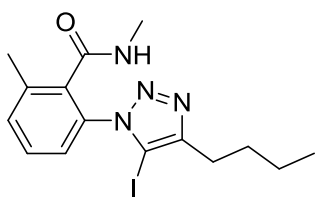

Prepared from azide **S2e** (128.3 mg, 0.675 mmol) and iodoalkyne **S3a** (101  $\mu\text{L}$ , 0.743 mmol, 1.1 equiv) according to **GP2** at room temperature; eluent: hexanes–EtOAc = 1:1. Yield 198 mg (74%). Yellow solid; mp 142–144  $^\circ\text{C}$ .

$^1\text{H}$  NMR (400 MHz,  $\text{CDCl}_3$ )  $\delta$  7.49–7.42 (m, 2H), 7.15 (m, 1H), 5.73 (m, 1H), 2.72 (m, 2H), 2.69 (d,  $J = 4.9$  Hz, 3H), 2.47 (s, 3H), 1.73 (m, 2H), 1.41 (m, 2H), 0.97 (t,  $J = 7.4$  Hz, 3H).

$^{13}\text{C}\{^1\text{H}\}$  NMR (100 MHz,  $\text{CDCl}_3$ )  $\delta$  166.0 ( $\text{C}_{\text{quat}}$ ), 152.1 ( $\text{C}_{\text{quat}}$ ), 137.7 ( $\text{C}_{\text{quat}}$ ), 135.7 ( $\text{C}_{\text{quat}}$ ), 133.8 ( $\text{C}_{\text{quat}}$ ), 132.7, 129.4, 125.3, 82.1 ( $\text{C}_{\text{quat}}$ ), 31.0, 26.3, 25.7, 22.2, 19.5, 13.8.

HRMS (MALDI-TOF) calcd for  $\text{C}_{15}\text{H}_{20}\text{IN}_4\text{O}$   $[\text{M}+\text{H}]^+$  399.0676; found 399.0679.

### 2-(4-Butyl-5-iodo-1H-1,2,3-triazol-1-yl)-N,3-dimethylbenzamide (1f)

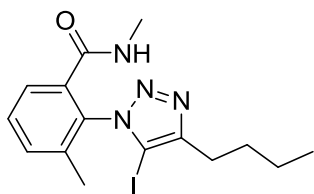

Prepared from azide **S2f** (190.2 mg, 1.0 mmol) and iodoalkyne **S3a** (149  $\mu\text{L}$ , 1.1 mmol, 1.1 equiv) according to **GP3**; eluent: hexanes–EtOAc = 1:1. Yield 200 mg (50%). Pale yellow solid; mp 142–144  $^\circ\text{C}$ .

$^1\text{H}$  NMR (400 MHz,  $\text{CDCl}_3$ )  $\delta$  7.64 (dd,  $J = 7.6, 1.5$  Hz, 1H), 7.52 (t,  $J = 7.6$  Hz, 1H), 7.46 (m, 1H), 5.83 (m, 1H), 2.76 (m, 2H), 2.67 (d,  $J = 4.9$  Hz, 3H), 1.98 (s, 3H), 1.75 (m, 2H), 1.39 (m, 2H), 0.97 (t,  $J = 7.4$  Hz, 3H).

$^{13}\text{C}\{^1\text{H}\}$  NMR (100 MHz,  $\text{CDCl}_3$ )  $\delta$  166.1 ( $\text{C}_{\text{quat}}$ ), 152.6 ( $\text{C}_{\text{quat}}$ ), 136.9 ( $\text{C}_{\text{quat}}$ ), 135.3 ( $\text{C}_{\text{quat}}$ ), 132.8 ( $\text{C}_{\text{quat}}$ ), 132.7, 130.9, 127.1, 82.9 ( $\text{C}_{\text{quat}}$ ), 31.0, 26.7, 25.7, 22.1, 17.3, 13.8.

HRMS (MALDI-TOF) calcd for  $\text{C}_{15}\text{H}_{20}\text{IN}_4\text{O}$   $[\text{M}+\text{H}]^+$  399.0676; found 399.0669.

### 2-(4-tert-Butyl-5-iodo-1H-1,2,3-triazol-1-yl)-N-methylbenzamide (1g)

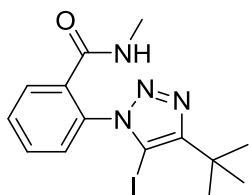

Prepared from azide **S2a** (176.2 mg, 1.0 mmol) and iodoalkyne **S3b** (229 mg, 1.1 mmol, 1.1 equiv) according to **GP2** at room temperature; eluent: hexanes–EtOAc = 1:1. Yield 265 mg (69%). White solid; mp 161–163  $^\circ\text{C}$ .

$^1\text{H}$  NMR (400 MHz,  $\text{CDCl}_3$ – $\text{CD}_3\text{OD}$ )  $\delta$  7.76 (m, 1H), 7.70–7.64 (m, 2H), 7.41 (m, 1H), 2.72 (s, 3H), 1.53 (s, 9H).

$^{13}\text{C}\{^1\text{H}\}$  NMR (100 MHz,  $\text{CDCl}_3$ – $\text{CD}_3\text{OD}$ )  $\delta$  166.5 ( $\text{C}_{\text{quat}}$ ), 156.5 ( $\text{C}_{\text{quat}}$ ), 134.1 ( $\text{C}_{\text{quat}}$ ), 134.0 ( $\text{C}_{\text{quat}}$ ), 130.6, 130.4, 128.5, 128.4, 78.6 ( $\text{C}_{\text{quat}}$ ), 31.3 ( $\text{C}_{\text{quat}}$ ), 28.9 (3C), 25.8.

HRMS (MALDI-TOF) calcd for  $\text{C}_{14}\text{H}_{18}\text{IN}_4\text{O}$   $[\text{M}+\text{H}]^+$  385.0520; found 385.0517.

### 2-(5-Iodo-4-phenyl-1H-1,2,3-triazol-1-yl)-N-methylbenzamide (1h)

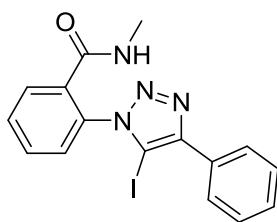

Prepared from azide **S2a** (704.8 mg, 4.0 mmol) and iodoalkyne **S3e** (1.049 g, 4.6 mmol) according to **GP2**; eluent:  $\text{CH}_2\text{Cl}_2$ –MeOH = 20:1. Yield 1.483 g (92%). Pale yellow solid; mp 170–171  $^\circ\text{C}$ .

$^1\text{H}$  NMR (400 MHz,  $\text{CDCl}_3$ )  $\delta$  8.06–8.02 (m, 2H), 7.88 (m, 1H), 7.71–7.64 (m, 2H), 7.54–7.48 (m, 2H), 7.47–7.39 (m, 2H), 5.86 (m, 1H), 2.76 (d,  $J = 4.9$  Hz, 3H).

$^{13}\text{C}\{^1\text{H}\}$  NMR (100 MHz,  $\text{CDCl}_3$ )  $\delta$  165.8 ( $\text{C}_{\text{quat}}$ ), 149.9 ( $\text{C}_{\text{quat}}$ ), 134.7 ( $\text{C}_{\text{quat}}$ ), 133.9 ( $\text{C}_{\text{quat}}$ ), 131.1, 131.0, 129.7 ( $\text{C}_{\text{quat}}$ ), 129.6, 128.8, 128.7, 128.5 (2C), 127.4 (2C), 80.7 ( $\text{C}_{\text{quat}}$ ), 26.8.



HRMS (MALDI-TOF) calcd for C<sub>16</sub>H<sub>14</sub>IN<sub>4</sub>O [M+H]<sup>+</sup> 405.0207; found 405.0208.

### 2-[5-Iodo-4-[2-(trifluoromethyl)phenyl]-1H-1,2,3-triazol-1-yl]-N-methylbenzamide (1i)

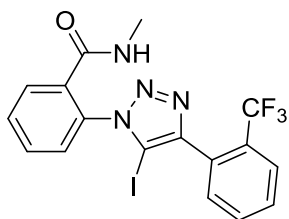

Prepared from azide **S2a** (176.2 mg, 1.0 mmol) and iodoalkyne **S3f** (326 mg, 1.1 mmol, 1.1 equiv) according to **GP2** at room temperature; eluent: hexanes-CH<sub>2</sub>Cl<sub>2</sub>-EtOAc = 2:2:1. Yield 392 mg (83%). Beige solid; mp 184–186 °C.

<sup>1</sup>H NMR (400 MHz, CDCl<sub>3</sub>-CD<sub>3</sub>OD) δ 7.86 (m, 1H), 7.81 (m, 1H),

7.74–7.63 (m, 4H), 7.52 (m, 1H), 7.48 (m, 1H), 2.76 (s, 3H).

<sup>13</sup>C{<sup>1</sup>H} NMR (100 MHz, CDCl<sub>3</sub>-CD<sub>3</sub>OD) δ 166.4 (C<sub>quat</sub>), 149.7 (C<sub>quat</sub>), 134.2 (C<sub>quat</sub>), 133.6 (C<sub>quat</sub>), 132.7, 131.5, 130.9 (2C), 129.8 (q, J<sub>CF</sub> = 30.7 Hz, C<sub>quat</sub>), 129.5, 129.0, 128.23, 128.16 (q, J<sub>CF</sub> = 1.9 Hz, C<sub>quat</sub>), 126.2 (q, J<sub>CF</sub> = 5.1 Hz), 123.4 (q, J<sub>CF</sub> = 274 Hz, CF<sub>3</sub>), 85.0 (C<sub>quat</sub>), 26.2.

HRMS (MALDI-TOF) calcd for C<sub>17</sub>H<sub>13</sub>F<sub>3</sub>IN<sub>4</sub>O [M+H]<sup>+</sup> 473.0081; found 473.0083.

### 2-[4-(1-Hydroxy-1-methylethyl)-5-iodo-1H-1,2,3-triazol-1-yl]-N-methylbenzamide (1j)

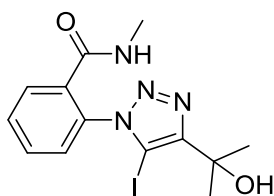

Prepared from azide **S2a** (176.2 mg, 1.0 mmol) and iodoalkyne **S3c** (231 mg, 1.1 mmol, 1.1 equiv) according to **GP2** at room temperature; eluent: CH<sub>2</sub>Cl<sub>2</sub>-MeOH = 10:1. Yield 370 mg (96%). Beige solid; mp 142–144 °C.

<sup>1</sup>H NMR (400 MHz, CDCl<sub>3</sub>-CD<sub>3</sub>OD) δ 7.75 (m, 1H), 7.71–7.61 (m, 3H), 7.43 (m, 1H), 2.754 (d, J = 4.0 Hz, 3H, CH<sub>3</sub>NH), 2.749 (s, 3H, CH<sub>3</sub>ND), 1.74 (s, 6H).

<sup>13</sup>C{<sup>1</sup>H} NMR (100 MHz, CDCl<sub>3</sub>-CD<sub>3</sub>OD) δ 166.7 and 166.6 [C(O)NH/D], 155.2 (br, C<sub>quat</sub>), 134.3 (C<sub>quat</sub>), 133.7 (C<sub>quat</sub>), 130.8, 130.5, 128.5, 128.3, 79.4 (br, C<sub>quat</sub>), 68.2 (C<sub>quat</sub>), 29.0 (2C), 26.1 and 26.0 (CH<sub>3</sub>NH/D).

HRMS (MALDI-TOF) calcd for C<sub>13</sub>H<sub>16</sub>IN<sub>4</sub>O<sub>2</sub> [M+H]<sup>+</sup> 387.0312; found 387.0314.

### 2-[4-(2-Hydroxyethyl)-5-iodo-1H-1,2,3-triazol-1-yl]-N-methylbenzamide (1k)

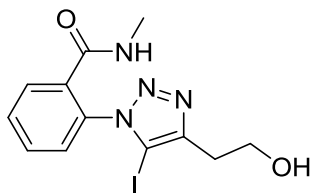

Prepared from azide **S2a** (176.2 mg, 1.0 mmol) and iodoalkyne **S3d** (215.6 mg, 1.1 mmol, 1.1 equiv) according to **GP2** at room temperature; due to a low solubility the precipitated product was isolated by filtration, washed with CH<sub>2</sub>Cl<sub>2</sub>, and dried *in vacuo*. Yield

329.0 mg (88%). White solid; mp 161–163 °C.

<sup>1</sup>H NMR (400 MHz, DMSO-*d*<sub>6</sub>) δ 8.37 (br q, J = 4.6 Hz, 1H), 7.73–7.64 (m, 3H), 7.45 (m, 1H), 4.78 (br t, J = 5.3 Hz, 1H), 3.67 (br td, J = 7.4, 5.3 Hz, 2H), 2.78 (t, J = 7.4 Hz, 2H), 2.59 (d, J = 4.6 Hz, 3H).

<sup>13</sup>C{<sup>1</sup>H} NMR (100 MHz, DMSO-*d*<sub>6</sub>) δ 165.5 (C<sub>quat</sub>), 147.9 (C<sub>quat</sub>), 134.8 (C<sub>quat</sub>), 134.3 (C<sub>quat</sub>), 130.6, 130.3, 128.6, 128.5, 85.9 (C<sub>quat</sub>), 60.1, 29.9, 26.1.

HRMS (MALDI-TOF) calcd for C<sub>12</sub>H<sub>14</sub>IN<sub>4</sub>O<sub>2</sub> [M+H]<sup>+</sup> 373.0156; found 373.0160.

### 2-[4-(4-*tert*-Butylphenyl)-5-iodo-1*H*-1,2,3-triazol-1-yl]-*N*-methylbenzamide (**1l**)

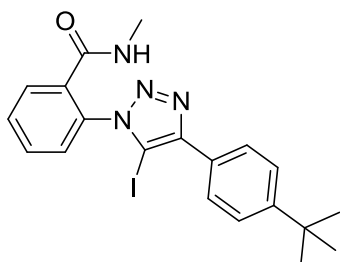

Prepared from azide **S2a** (176.2 mg, 1.0 mmol) and iodoalkyne **S3g** (312.5 mg, 1.1 mmol, 1.1 equiv) according to **GP2** at room temperature; eluent: hexanes–CH<sub>2</sub>Cl<sub>2</sub>–EtOAc = 1:1:2. Yield 435 mg (94%). Beige solid; mp 180–182 °C.

<sup>1</sup>H NMR (400 MHz, CDCl<sub>3</sub>–CD<sub>3</sub>OD) δ 7.95–7.89 (m, 2H), 7.77 (m, 1H), 7.73–7.66 (m, 2H), 7.56–7.50 (m, 2H), 7.48 (m, 1H), 2.76 (s, 3H), 1.38 (s, 9H).

<sup>13</sup>C{<sup>1</sup>H} NMR (100 MHz, CDCl<sub>3</sub>–CD<sub>3</sub>OD) δ 166.6 (C<sub>quat</sub>), 151.4 (C<sub>quat</sub>), 149.4 (C<sub>quat</sub>), 134.1 (C<sub>quat</sub>), 133.8 (C<sub>quat</sub>), 130.6, 130.4, 128.4, 128.3, 126.7 (2C), 126.4 (C<sub>quat</sub>), 125.0 (2C), 80.6 (C<sub>quat</sub>), 34.1 (C<sub>quat</sub>), 30.5 (3C), 25.8.

HRMS (MALDI-TOF) calcd for C<sub>20</sub>H<sub>22</sub>IN<sub>4</sub>O [M+H]<sup>+</sup> 461.0833; found 461.0832.

### 2-[5-Iodo-4-(4-methoxyphenyl)-1*H*-1,2,3-triazol-1-yl]-*N*-methylbenzamide (**1m**)

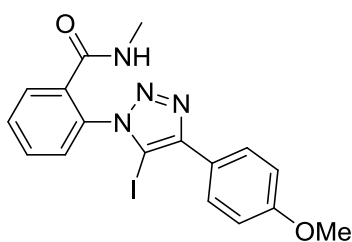

Prepared from azide **S2a** (176.2 mg, 1.0 mmol) and iodoalkyne **S3h** (284 mg, 1.1 mmol, 1.1 equiv) according to **GP2** at room temperature; eluent: hexanes–EtOAc = 1:1. Yield 390 mg (90%). Beige solid; mp 171–173 °C.

<sup>1</sup>H NMR (400 MHz, CDCl<sub>3</sub>–DMSO-*d*<sub>6</sub>) δ 8.23 (br s, 1H), 7.99–7.93 (m, 2H), 7.76 (m, 1H), 7.71–7.62 (m, 2H), 7.46 (m, 1H), 7.05–6.98 (m, 2H), 3.85 (s, 3H), 2.70 (d, *J* = 4.5 Hz, 3H).

<sup>13</sup>C{<sup>1</sup>H} NMR (100 MHz, CDCl<sub>3</sub>–DMSO-*d*<sub>6</sub>) δ 164.3 (C<sub>quat</sub>), 157.9 (C<sub>quat</sub>), 146.9 (C<sub>quat</sub>), 133.4 (C<sub>quat</sub>), 133.1 (C<sub>quat</sub>), 129.0, 128.8, 127.3 (2C), 126.9 (2C), 121.3 (C<sub>quat</sub>), 112.3 (2C), 80.4 (C<sub>quat</sub>), 53.7, 24.8.

HRMS (MALDI-TOF) calcd for C<sub>17</sub>H<sub>16</sub>IN<sub>4</sub>O<sub>2</sub> [M+H]<sup>+</sup> 435.0312; found 435.0308.

### Methyl 3-(5-iodo-1-[2-[(methylamino)carbonyl]phenyl]-1*H*-1,2,3-triazol-4-yl)benzoate (**1n**)

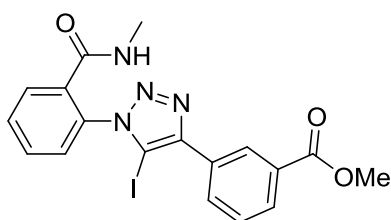

Prepared from azide **S2a** (123.3 mg, 0.7 mmol) and iodoalkyne **S3i** (230.3 mg, 0.105 mmol, 1.15 equiv) according to **GP2**; eluent: CH<sub>2</sub>Cl<sub>2</sub>–MeOH = 30:1. Yield 317.7 mg (98%). White solid; mp 147–149 °C.

<sup>1</sup>H NMR (400 MHz, CDCl<sub>3</sub>) δ 8.75 (t, *J* = 1.8 Hz, 1H), 8.25 (ddd, *J* = 7.8, 1.8, 1.2 Hz, 1H), 8.10 (ddd, *J* = 7.8, 1.8, 1.2 Hz, 1H), 7.83 (m, 1H), 7.69–7.63 (m, 2H), 7.58 (t, *J* = 7.8 Hz, 1H), 7.40 (m, 1H), 6.09 (br q, *J* = 4.9 Hz, 1H), 3.96 (s, 3H), 2.77 (d, *J* = 4.9 Hz, 3H).

$^{13}\text{C}\{^1\text{H}\}$  NMR (100 MHz,  $\text{CDCl}_3$ )  $\delta$  166.7 ( $\text{C}_{\text{quat}}$ ), 165.8 ( $\text{C}_{\text{quat}}$ ), 149.0 ( $\text{C}_{\text{quat}}$ ), 134.7 ( $\text{C}_{\text{quat}}$ ), 133.9 ( $\text{C}_{\text{quat}}$ ), 131.7, 131.2, 131.1, 130.5 ( $\text{C}_{\text{quat}}$ ), 130.1 ( $\text{C}_{\text{quat}}$ ), 129.8, 129.4, 128.7 (2C), 128.4, 81.1 ( $\text{C}_{\text{quat}}$ ), 52.3, 26.9.

HRMS (MALDI-TOF) calcd for  $\text{C}_{18}\text{H}_{16}\text{IN}_4\text{O}_3$   $[\text{M}+\text{H}]^+$  463.0262; found 463.0254.

### 2-[4-(4-Acetylphenyl)-5-iodo-1*H*-1,2,3-triazol-1-yl]-*N*-methylbenzamide (**1o**)

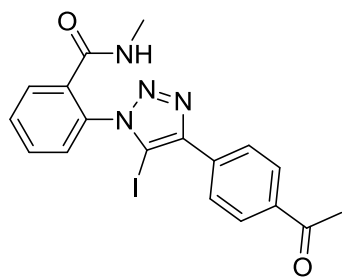

Prepared from azide **S2a** (123.3 mg, 0.7 mmol) and iodoalkyne **S3j** (217.4 mg, 0.105 mmol, 1.15 equiv) according to **GP2**; eluent: hexanes–EtOAc = 1:2. Yield 215.1 mg (69%). Light beige solid; mp 170–173 °C.

$^1\text{H}$  NMR (400 MHz,  $\text{CDCl}_3$ )  $\delta$  8.21–8.16 (m, 2H), 8.10–8.06 (m, 2H), 7.80 (m, 1H), 7.70–7.63 (m, 2H), 7.41 (m, 1H), 6.39 (br q,  $J$  =

4.5 Hz, 1H), 2.76 (d,  $J$  = 4.5 Hz, 3H,  $\text{CH}_3\text{NH}$ ), 2.75 (s, 3H,  $\text{CH}_3\text{ND}$ ), 2.66 (s, 3H).

$^{13}\text{C}\{^1\text{H}\}$  NMR (100 MHz,  $\text{CDCl}_3$ )  $\delta$  197.8 ( $\text{C}_{\text{quat}}$ ), 166.0 and 165.9 [ $\text{C}(\text{O})\text{NH}/\text{D}$ ], 148.6 ( $\text{C}_{\text{quat}}$ ), 136.7 ( $\text{C}_{\text{quat}}$ ), 134.63 and 134.59 [ $\text{C}_{\text{Ar}}\text{C}(\text{O})\text{NH}/\text{D}$ ], 134.3 ( $\text{C}_{\text{quat}}$ ), 133.9 ( $\text{C}_{\text{quat}}$ ), 131.2, 131.0, 129.2, 128.7, 128.6 (2C), 127.3 (2C), 81.7 ( $\text{C}_{\text{quat}}$ ), 26.8 and 26.64 ( $\text{CH}_3\text{NH}/\text{D}$ ), 26.62.

HRMS (MALDI-TOF) calcd for  $\text{C}_{18}\text{H}_{16}\text{IN}_4\text{O}_2$   $[\text{M}+\text{H}]^+$  447.0312; found 447.0309.

### Scheme for the synthesis of 2-(4-butyl-5-iodo-1*H*-1,2,3-triazol-1-yl)benzoic acid<sup>4</sup> (**S4**)

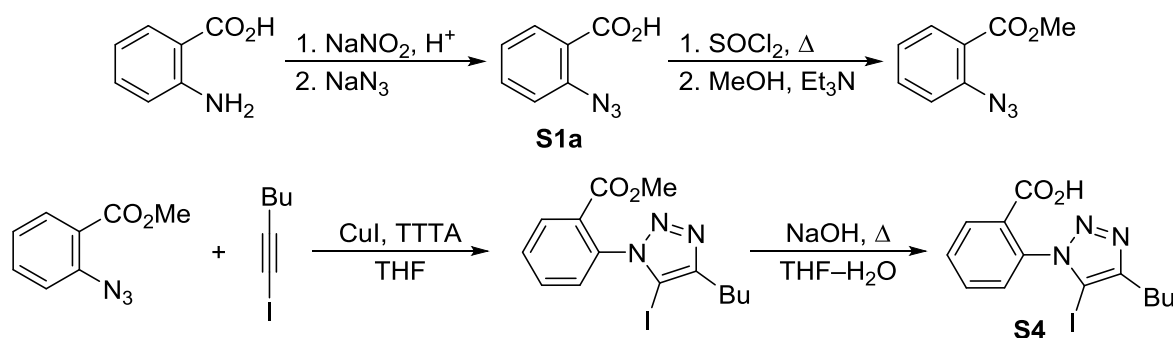

### Synthesis of 2-(4-butyl-5-iodo-1*H*-1,2,3-triazol-1-yl)benzamides **1**

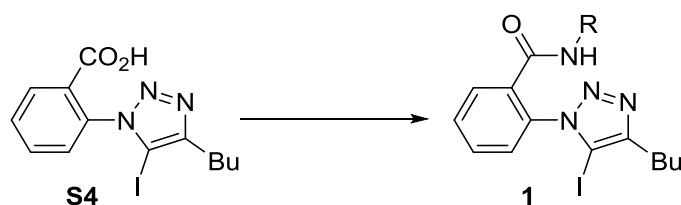

**GP4**: 1. *i*-BuOC(O)Cl,  $\text{Et}_3\text{N}$ , THF, 0 °C; 2.  $\text{RNH}_2$ , rt

**GP5**:  $\text{RNH}_2$ , HBTU,  $\text{Et}_3\text{N}$ , DMF, rt

**General procedure 4 (GP4)**. The suspension of 2-(4-butyl-5-iodo-1*H*-1,2,3-triazol-1-yl)benzoic acid **S4** (222.7 mg, 0.6 mmol, 1 equiv) in THF (4 mL) was cooled in an ice bath. Then isobutyl

chloroformate (116.7  $\mu\text{L}$ , 0.9 mmol, 1.5 equiv) and  $\text{Et}_3\text{N}$  (167.3  $\mu\text{L}$ , 1.2 mmol, 2 equiv) were added to the reaction mixture. After stirring for 40 min, the corresponding primary amine (1.2 mmol, 2 equiv) was added and the stirring was continued at ambient temperature. Upon completion of the reaction, the mixture was diluted with  $\text{CH}_2\text{Cl}_2$  (30 mL) and washed with water (30 mL). The organic layer was dried with anhydrous  $\text{Na}_2\text{SO}_4$ , and the solvents were evaporated *in vacuo*. The crude product was purified by column chromatography.

**General procedure 5 (GP5).** 2-(4-Butyl-5-iodo-1*H*-1,2,3-triazol-1-yl)benzoic acid **S4** (222.7 mg, 0.6 mmol, 1 equiv), 2-(1*H*-benzotriazol-1-yl)-1,1,3,3-tetramethyluronium hexafluorophosphate (HBTU) (273.1 mg, 0.72 mmol, 1.2 equiv),  $\text{Et}_3\text{N}$  (167.3  $\mu\text{L}$ , 1.2 mmol, 2 equiv), and the corresponding primary amine (0.72 mmol, 1.2 equiv) were mixed under an Ar atmosphere in DMF (6 mL). After stirring at ambient temperature overnight, the solvent was evaporated *in vacuo*. The obtained residue was dissolved in  $\text{CH}_2\text{Cl}_2$  (30 mL) and washed with water (4 $\times$ 30 mL). The organic layer was dried with anhydrous  $\text{Na}_2\text{SO}_4$ , and the solvent was evaporated *in vacuo*. The crude product was purified by column chromatography.

#### 2-(4-Butyl-5-iodo-1*H*-1,2,3-triazol-1-yl)benzamide (**1p**)

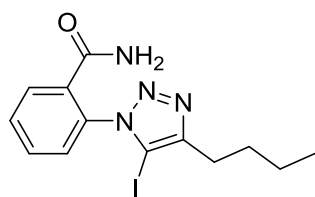

Prepared from carboxylic acid **S4** (259.8 mg, 0.7 mmol) and 25% aqueous ammonia (210  $\mu\text{L}$ , 0.28 mmol, 4 equiv) according to **GP4**; eluent:  $\text{CH}_2\text{Cl}_2$ –MeOH = 20:1. Yield 236.9 mg (91%). White solid; mp 114–116  $^\circ\text{C}$ .

$^1\text{H}$  NMR (400 MHz,  $\text{CDCl}_3$ )  $\delta$  7.91 (m, 1H), 7.68–7.61 (m, 2H), 7.32 (m, 1H), 5.77 (br s, 1H), 5.70 (br s, 1H), 2.73 (m, 2H), 1.73 (m, 2H), 1.40 (m, 2H), 0.96 (t,  $J = 7.4$  Hz, 3H).

$^{13}\text{C}\{^1\text{H}\}$  NMR (100 MHz,  $\text{CDCl}_3$ )  $\delta$  166.9 ( $\text{C}_{\text{quat}}$ ), 152.7 ( $\text{C}_{\text{quat}}$ ), 134.1 ( $\text{C}_{\text{quat}}$ ), 133.5 ( $\text{C}_{\text{quat}}$ ), 131.6, 131.0, 130.1, 128.5, 82.6 ( $\text{C}_{\text{quat}}$ ), 31.0, 25.8, 22.2, 13.8.

Anal. calcd for  $\text{C}_{13}\text{H}_{15}\text{IN}_4\text{O}$ : C, 42.18; H, 4.08; N, 15.13; found C, 42.44; H, 4.22; N, 14.88.

HRMS (MALDI-TOF) calcd for  $\text{C}_{13}\text{H}_{16}\text{IN}_4\text{O}$   $[\text{M}+\text{H}]^+$  371.0363; found 371.0362.

#### 2-(4-Butyl-5-iodo-1*H*-1,2,3-triazol-1-yl)-*N*-(4-methylphenyl)benzamide (**1q**)

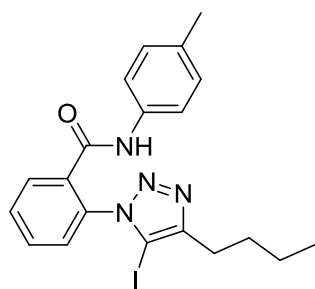

Prepared from carboxylic acid **S4** (259.8 mg, 0.7 mmol) and *p*-toluidine (90.0 mg, 0.84 mmol, 1.2 equiv) according to **GP5**; eluent: hexanes–EtOAc = 2:1. Yield 291.8 mg (91%). White solid; mp 148–149  $^\circ\text{C}$ .

$^1\text{H}$  NMR (400 MHz,  $\text{CDCl}_3$ )  $\delta$  7.97 (m, 1H), 7.69–7.61 (m, 2H), 7.55 (br s, 1H), 7.35 (m, 1H), 7.25–7.19 (m, 2H), 7.05–7.00 (m, 2H), 2.66 (m, 2H), 2.26 (s, 3H), 1.59 (m, 2H), 1.26 (m, 2H), 0.83 (t,  $J = 7.3$  Hz, 3H).

$^{13}\text{C}\{^1\text{H}\}$  NMR (100 MHz,  $\text{CDCl}_3$ )  $\delta$  162.8 ( $\text{C}_{\text{quat}}$ ), 153.1 ( $\text{C}_{\text{quat}}$ ), 134.8 ( $\text{C}_{\text{quat}}$ ), 134.7 ( $\text{C}_{\text{quat}}$ ), 134.4 ( $\text{C}_{\text{quat}}$ ), 133.7 ( $\text{C}_{\text{quat}}$ ), 131.5, 131.3, 130.6, 129.4 (2C), 128.5, 119.9 (2C), 82.8 ( $\text{C}_{\text{quat}}$ ), 31.0, 25.8, 22.1, 20.8, 13.7.

Anal. calcd for  $\text{C}_{20}\text{H}_{21}\text{IN}_4\text{O}$ : C, 52.19; H, 4.60; N, 12.17; found C, 52.26; H, 4.86; N, 11.89.

HRMS (MALDI-TOF) calcd for  $\text{C}_{20}\text{H}_{22}\text{IN}_4\text{O}$   $[\text{M}+\text{H}]^+$  461.0833; found 461.0835.

### 2-(4-Butyl-5-iodo-1*H*-1,2,3-triazol-1-yl)-*N*-(4-methoxyphenyl)benzamide (1r)

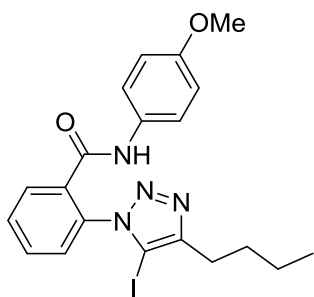

Prepared from carboxylic acid **S4** (259.8 mg, 0.7 mmol) and *p*-anisidine (103.4 mg, 0.84 mmol, 1.2 equiv) according to **GP5**; eluent:  $\text{CH}_2\text{Cl}_2$ -MeOH = 20:1. Yield 311 mg (93%). Beige solid; mp 123–125 °C.

$^1\text{H}$  NMR (400 MHz,  $\text{CDCl}_3$ )  $\delta$  7.99 (m, 1H), 7.72–7.64 (m, 2H), 7.51 (br s, 1H), 7.38 (m, 1H), 7.29–7.24 (m, 2H), 6.81–6.76 (m, 2H), 3.76

(s, 3H), 2.69 (m, 2H), 1.62 (m, 2H), 1.29 (m, 2H), 0.86 (t,  $J = 7.3$  Hz, 3H).

$^{13}\text{C}\{^1\text{H}\}$  NMR (100 MHz,  $\text{CDCl}_3$ )  $\delta$  162.9 ( $\text{C}_{\text{quat}}$ ), 156.4 ( $\text{C}_{\text{quat}}$ ), 152.7 ( $\text{C}_{\text{quat}}$ ), 134.6 ( $\text{C}_{\text{quat}}$ ), 133.7 ( $\text{C}_{\text{quat}}$ ), 131.2, 130.9, 130.4 ( $\text{C}_{\text{quat}}$ ), 130.1, 128.3, 121.7 (2C), 113.8 (2C), 82.9 ( $\text{C}_{\text{quat}}$ ), 55.3, 30.9, 25.7, 22.0, 13.7.

HRMS (MALDI-TOF) calcd for  $\text{C}_{20}\text{H}_{22}\text{IN}_4\text{O}_2$   $[\text{M}+\text{H}]^+$  477.0782; found 477.0778.

### 2-(4-Butyl-5-iodo-1*H*-1,2,3-triazol-1-yl)-*N*-cyclopropylbenzamide (1s)

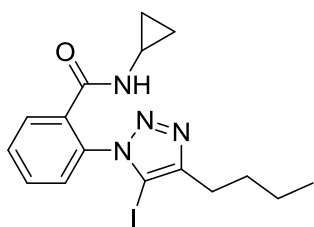

Prepared from carboxylic acid **S4** (222.7 mg, 0.6 mmol) and cyclopropylamine (49.9  $\mu\text{L}$ , 0.72 mmol, 1.2 equiv) according to **GP5**; eluent: hexanes- $\text{CH}_2\text{Cl}_2$ -EtOAc = 1:1:2. Yield 204 mg (83%). White solid; mp 133–135 °C.

$^1\text{H}$  NMR (600 MHz,  $\text{CDCl}_3$ )  $\delta$  7.86 (m, 1H), 7.63 (m, 1H), 7.60 (m, 1H), 7.29 (m, 1H), 5.82 (br s, 1H), 2.72 (m, 2H), 2.61 (ttt,  $J = 7.1, 3.8, 3.2$  Hz, 1H), 1.73 (m, 2H), 1.43 (m, 2H), 0.96 (t,  $J = 7.4$  Hz, 3H), 0.70–0.61 (m, 2H), 0.24–0.16 (m, 2H).

$^{13}\text{C}\{^1\text{H}\}$  NMR (151 MHz,  $\text{CDCl}_3$ )  $\delta$  166.4 ( $\text{C}_{\text{quat}}$ ), 152.6 ( $\text{C}_{\text{quat}}$ ), 134.5 ( $\text{C}_{\text{quat}}$ ), 133.9 ( $\text{C}_{\text{quat}}$ ), 131.2, 131.1, 130.1, 128.2, 82.6 ( $\text{C}_{\text{quat}}$ ), 31.0, 25.8, 22.7, 22.3, 13.8, 6.5 (2C).

HRMS (MALDI-TOF) calcd for  $\text{C}_{16}\text{H}_{20}\text{IN}_4\text{O}$   $[\text{M}+\text{H}]^+$  411.0676; found 411.0675.

### 2-(4-Butyl-5-iodo-1*H*-1,2,3-triazol-1-yl)-*N*-cyclohexylbenzamide (1t)

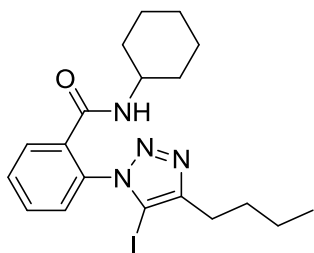

Prepared from carboxylic acid **S4** (222.7 mg, 0.6 mmol) and cyclohexylamine (136.8  $\mu\text{L}$ , 1.2 mmol, 2 equiv) according to **GP4**; eluent: hexanes-EtOAc = 2:1. Yield 254 mg (94%). White solid; mp 96–98 °C.

$^1\text{H}$  NMR (400 MHz,  $\text{CDCl}_3$ )  $\delta$  7.88 (m, 1H), 7.64 (m, 1H), 7.60 (m,

1H), 7.29 (m, 1H), 5.52 (br d,  $J = 7.9$  Hz, 1H), 3.69 (tdt,  $J = 10.7, 7.9, 4.0$  Hz, 1H), 2.73 (m, 2H), 1.78–1.64 (m, 4H), 1.63–1.50 (m, 2H), 1.44 (m, 2H), 1.33–1.20 (m, 3H), 1.07 (m, 1H), 0.97 (t,  $J = 7.4$  Hz, 3H), 0.92–0.81 (m, 2H).

$^{13}\text{C}\{^1\text{H}\}$  NMR (100 MHz,  $\text{CDCl}_3$ )  $\delta$  164.0 ( $\text{C}_{\text{quat}}$ ), 152.6 ( $\text{C}_{\text{quat}}$ ), 135.0 ( $\text{C}_{\text{quat}}$ ), 133.7 ( $\text{C}_{\text{quat}}$ ), 131.1, 131.0, 130.1, 128.3, 82.7 ( $\text{C}_{\text{quat}}$ ), 48.5, 32.4 (2C), 31.1, 25.8, 25.2, 24.6 (2C), 22.3, 13.8.

HRMS (MALDI-TOF) calcd for  $\text{C}_{19}\text{H}_{26}\text{IN}_4\text{O}$   $[\text{M}+\text{H}]^+$  453.1146; found 453.1141.

#### 2-(4-Butyl-5-iodo-1*H*-1,2,3-triazol-1-yl)-*N*-[(1*R*)-1-phenylethyl]benzamide (**1u**)

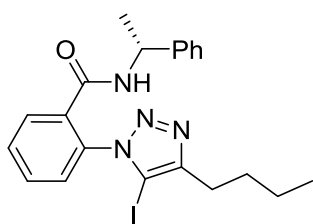

Prepared from carboxylic acid **S4** (276.3 mg, 0.744 mmol) and (*R*)-1-phenylethylamine (116  $\mu\text{L}$ , 0.893 mmol, 1.2 equiv) according to **GP4**; eluent: hexanes–EtOAc = 1:1. Yield 335.8 mg (95%). White solid; mp 85–87  $^\circ\text{C}$ .

$^1\text{H}$  NMR (600 MHz,  $\text{CDCl}_3$ )  $\delta$  7.88 (m, 1H), 7.62 (m, 1H), 7.60 (m, 1H), 7.30–7.26 (m, 3H), 7.22 (m, 1H), 7.15–7.12 (m, 2H), 5.99 (br d,  $J = 7.6$  Hz, 1H), 5.03 (dq,  $J = 7.6, 6.9$  Hz, 1H), 2.71–2.62 (m, 2H), 1.71 (m, 2H), 1.43 (m, 2H), 1.27 (d,  $J = 6.9$  Hz, 3H), 0.96 (t,  $J = 7.4$  Hz, 3H).

$^{13}\text{C}\{^1\text{H}\}$  NMR (151 MHz,  $\text{CDCl}_3$ )  $\delta$  164.0 ( $\text{C}_{\text{quat}}$ ), 152.7 ( $\text{C}_{\text{quat}}$ ), 142.3 ( $\text{C}_{\text{quat}}$ ), 134.6 ( $\text{C}_{\text{quat}}$ ), 133.8 ( $\text{C}_{\text{quat}}$ ), 131.2, 131.1, 130.3, 128.6 (2C), 128.4, 127.4, 126.1 (2C), 82.6 ( $\text{C}_{\text{quat}}$ ), 49.4, 31.0, 25.9, 22.4, 21.4, 13.8.

HRMS (MALDI-TOF) calcd for  $\text{C}_{21}\text{H}_{24}\text{IN}_4\text{O}$   $[\text{M}+\text{H}]^+$  475.0989; found 475.0987.

#### 2-(4-Butyl-5-iodo-1*H*-1,2,3-triazol-1-yl)benzohydrazide (**1v**)

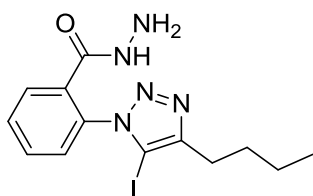

Prepared from carboxylic acid **S4** (111.4 mg, 0.3 mmol) and hydrazine hydrate (67.4  $\mu\text{L}$ , 1.5 mmol, 5 equiv) according to **GP4**; eluent:  $\text{CH}_2\text{Cl}_2$ –MeOH = 20:1. Yield 89.0 mg (77%). Pale yellow solid; mp 94–96  $^\circ\text{C}$ .

$^1\text{H}$  NMR (400 MHz,  $\text{CDCl}_3$ – $\text{CD}_3\text{OD}$ )  $\delta$  7.72 (m, 1H), 7.66–7.58 (m, 2H), 7.36 (m, 1H), 3.16 (br s, 3H), 2.71 (m, 2H), 1.72 (m, 2H), 1.40 (m, 2H), 0.95 (t,  $J = 7.3$  Hz, 3H).

$^{13}\text{C}\{^1\text{H}\}$  NMR (100 MHz,  $\text{CDCl}_3$ – $\text{CD}_3\text{OD}$ )  $\delta$  166.2 ( $\text{C}_{\text{quat}}$ ), 152.1 ( $\text{C}_{\text{quat}}$ ), 134.4 ( $\text{C}_{\text{quat}}$ ), 132.3 ( $\text{C}_{\text{quat}}$ ), 131.2, 130.7, 129.1, 128.4, 82.2 ( $\text{C}_{\text{quat}}$ ), 30.8, 25.6, 22.1, 13.6.

HRMS (MALDI-TOF) calcd for  $\text{C}_{13}\text{H}_{16}\text{IN}_4\text{O}$   $[\text{M}-\text{NH}_3+\text{H}]^+$  371.0363; found 371.0358.

#### 2-(4-Butyl-5-iodo-1*H*-1,2,3-triazol-1-yl)-*N*-(2-furylmethyl)benzamide (**1w**)

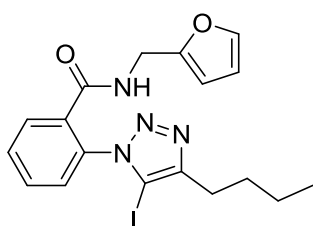

Prepared from carboxylic acid **S4** (297 mg, 0.8 mmol) and (2-furylmethyl)amine (144.3  $\mu\text{L}$ , 1.6 mmol) according to **GP4**; eluent: hexanes–EtOAc = 2:1. Yield 291.3 mg (81%). Beige solid; mp 203–205  $^\circ\text{C}$ .

$^1\text{H}$  NMR (400 MHz,  $\text{CDCl}_3$ )  $\delta$  7.85 (m, 1H), 7.63–7.56 (m, 2H), 7.32–7.26 (m, 2H), 6.25 (dd,  $J = 3.2, 1.9$  Hz, 1H), 6.14 (br t,  $J = 5.6$  Hz, 1H), 6.10 (m, 1H), 4.31 (d,  $J = 5.6$  Hz, 2H), 2.65 (m, 2H), 1.68 (m, 2H), 1.39 (m, 2H), 0.94 (t,  $J = 7.4$  Hz, 3H).

$^{13}\text{C}\{^1\text{H}\}$  NMR (100 MHz,  $\text{CDCl}_3$ )  $\delta$  164.8 ( $\text{C}_{\text{quat}}$ ), 152.4 ( $\text{C}_{\text{quat}}$ ), 150.3 ( $\text{C}_{\text{quat}}$ ), 142.1, 134.0 ( $\text{C}_{\text{quat}}$ ), 133.9 ( $\text{C}_{\text{quat}}$ ), 131.2, 130.9, 129.9, 128.5, 110.3, 107.5, 82.4 ( $\text{C}_{\text{quat}}$ ), 36.8, 30.9, 25.8, 22.2, 13.8.

HRMS (MALDI-TOF) calcd for  $\text{C}_{18}\text{H}_{20}\text{IN}_4\text{O}_2$   $[\text{M}+\text{H}]^+$  451.0625; found 451.0627.

### 2-(4-Butyl-5-iodo-1H-1,2,3-triazol-1-yl)-N-[2-(5-methoxy-1H-indol-3-yl)ethyl]benzamide

(1x)

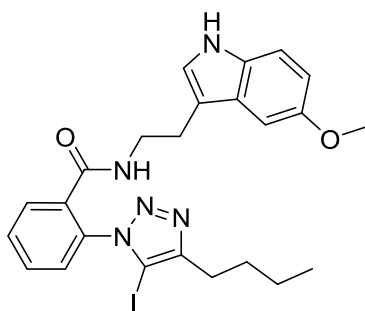

Prepared from carboxylic acid **S4** (297 mg, 0.8 mmol) and [2-(5-methoxy-1H-indol-3-yl)ethyl]amine (228.3 mg, 1.2 mmol, 1.5 equiv) according to **GP4**; eluent:  $\text{CH}_2\text{Cl}_2$ –MeOH = 50:1. Yield 370.6 mg (85%). Beige solid; mp 81–83 °C.

$^1\text{H}$  NMR (400 MHz,  $\text{CDCl}_3$ )  $\delta$  8.21 (br s, 1H), 7.72 (m, 1H), 7.60–7.53 (m, 2H), 7.29 (m, 1H), 7.19 (d,  $J = 8.8$  Hz, 1H), 6.99–6.94 (m, 2H), 6.81 (dd,  $J = 8.8, 2.4$  Hz, 1H), 5.87 (br t,  $J = 5.7$  Hz, 1H), 3.81 (s, 3H), 3.49 (td,  $J = 6.8, 5.7$  Hz, 2H), 2.72 (t,  $J = 6.8$  Hz, 2H), 2.64 (m, 2H), 1.69 (m, 2H), 1.38 (m, 2H), 0.92 (t,  $J = 7.3$  Hz, 3H).

$^{13}\text{C}\{^1\text{H}\}$  NMR (100 MHz,  $\text{CDCl}_3$ )  $\delta$  165.3 ( $\text{C}_{\text{quat}}$ ), 153.9 ( $\text{C}_{\text{quat}}$ ), 152.5 ( $\text{C}_{\text{quat}}$ ), 134.7 ( $\text{C}_{\text{quat}}$ ), 134.0 ( $\text{C}_{\text{quat}}$ ), 131.5 ( $\text{C}_{\text{quat}}$ ), 131.0, 130.9, 129.6, 128.3, 127.4 ( $\text{C}_{\text{quat}}$ ), 123.2, 112.3, 112.0, 111.8 ( $\text{C}_{\text{quat}}$ ), 100.3, 82.5 ( $\text{C}_{\text{quat}}$ ), 55.9, 39.9, 31.1, 25.7, 24.8, 22.3, 13.8.

HRMS (MALDI-TOF) calcd for  $\text{C}_{24}\text{H}_{27}\text{IN}_5\text{O}_2$   $[\text{M}+\text{H}]^+$  544.1204; found 544.1203.

### 2-(4-Butyl-5-iodo-1H-1,2,3-triazol-1-yl)-N-[2-(3,5-dimethylisoxazol-4-yl)ethyl]benzamide

(1y)

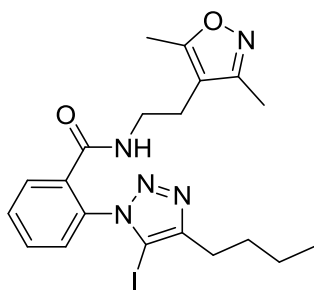

Prepared from carboxylic acid **S4** (297 mg, 0.8 mmol) and [2-(3,5-dimethylisoxazol-4-yl)ethyl]amine (224 mg, 1.6 mmol, 2 equiv) according to **GP4**; eluent:  $\text{CH}_2\text{Cl}_2$ –MeOH = 50:1. Yield 342.2 mg (87%). White solid; mp 166–168 °C.

$^1\text{H}$  NMR (400 MHz,  $\text{CDCl}_3$ )  $\delta$  7.78 (m, 1H), 7.64–7.59 (m, 2H), 7.31 (m, 1H), 6.19 (br t,  $J = 5.7$  Hz, 1H), 3.18 (m, 2H), 2.71 (m, 2H), 2.33 (m, 2H), 2.27 (s, 3H), 2.16 (s, 3H), 1.70 (m, 2H), 1.40 (m, 2H), 0.93 (t,  $J = 7.4$  Hz, 3H).

$^{13}\text{C}\{^1\text{H}\}$  NMR (100 MHz,  $\text{CDCl}_3$ )  $\delta$  165.7 ( $\text{C}_{\text{quat}}$ ), 165.4 ( $\text{C}_{\text{quat}}$ ), 159.5 ( $\text{C}_{\text{quat}}$ ), 152.6 ( $\text{C}_{\text{quat}}$ ), 134.4 ( $\text{C}_{\text{quat}}$ ), 133.9 ( $\text{C}_{\text{quat}}$ ), 131.2, 131.0, 129.6, 128.4, 110.2 ( $\text{C}_{\text{quat}}$ ), 82.5 ( $\text{C}_{\text{quat}}$ ), 39.5, 31.1, 25.8, 22.2, 22.0, 13.8, 10.9, 10.1.

HRMS (MALDI-TOF) calcd for C<sub>20</sub>H<sub>25</sub>IN<sub>5</sub>O<sub>2</sub> [M+H]<sup>+</sup> 494.1047; found 494.1049.

***N*-(*tert*-Butyl)-2-(4-butyl-5-iodo-1*H*-1,2,3-triazol-1-yl)benzamide (1z)**

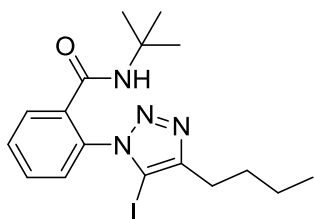

Prepared from carboxylic acid **S4** (222.7 mg, 0.6 mmol) and *tert*-butylamine (126.1 μL, 1.2 mmol, 2 equiv) according to **GP4**; eluent: hexanes–EtOAc = 2:1. Yield 205 mg (80%). White solid; mp 111–113 °C.

<sup>1</sup>H NMR (400 MHz, CDCl<sub>3</sub>) δ 7.83 (m, 1H), 7.62 (m, 1H), 7.58 (m, 1H), 7.28 (m, 1H), 5.42 (br s, 1H), 2.73 (m, 2H), 1.73 (m, 2H), 1.44 (m, 2H), 1.16 (s, 9H), 0.96 (t, *J* = 7.3 Hz, 3H).

<sup>13</sup>C{<sup>1</sup>H} NMR (100 MHz, CDCl<sub>3</sub>) δ 164.1 (C<sub>quat</sub>), 152.6 (C<sub>quat</sub>), 135.9 (C<sub>quat</sub>), 133.6 (C<sub>quat</sub>), 131.1, 130.8, 129.9, 128.1, 82.6 (C<sub>quat</sub>), 51.6 (C<sub>quat</sub>), 31.1, 28.2 (3C), 25.8, 22.3, 13.7.

HRMS (MALDI-TOF) calcd for C<sub>17</sub>H<sub>24</sub>IN<sub>4</sub>O [M+H]<sup>+</sup> 427.0989; found 427.0988.

***N,N'*-Butane-1,4-diylbis[2-(4-butyl-5-iodo-1*H*-1,2,3-triazol-1-yl)benzamide] (1aa)**

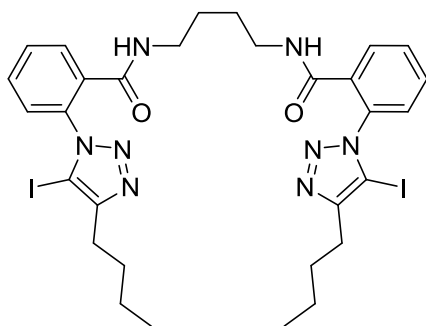

Prepared from carboxylic acid **S4** (267.2 mg, 0.72 mmol, 2.4 equiv) and butane-1,4-diamine (30.1 μL, 0.3 mmol) according to **GP5**; eluent: hexanes–EtOAc = 1:4. Yield 113.0 mg (47%). White solid; mp 135–137 °C.

<sup>1</sup>H NMR (400 MHz, CDCl<sub>3</sub>) δ 7.77 (m, 2H), 7.58–7.51 (m, 4H), 7.28 (m, 1H), 6.62 (br t, *J* = 5.5 Hz, 2H), 3.22 (m, 4H), 2.71 (m, 4H), 1.71 (m, 4H), 1.41 (m, 4H), 1.34 (m, 4H), 0.96 (t, *J* = 7.4 Hz, 6H).

<sup>13</sup>C{<sup>1</sup>H} NMR (100 MHz, CDCl<sub>3</sub>) δ 165.4 (2C<sub>quat</sub>), 152.1 (2C<sub>quat</sub>), 134.7 (2C<sub>quat</sub>), 134.2 (2C<sub>quat</sub>), 130.6 (4C), 129.1 (2C), 128.2 (2C), 82.5 (2C<sub>quat</sub>), 39.3 (2C), 31.0 (2C), 26.2 (2C), 25.8 (2C), 22.2 (2C), 13.8 (2C).

HRMS (MALDI-TOF) calcd for C<sub>30</sub>H<sub>37</sub>I<sub>2</sub>N<sub>8</sub>O<sub>2</sub> [M+H]<sup>+</sup> 795.1123; found 795.1122.

**2-(4-Butyl-5-iodo-1*H*-1,2,3-triazol-1-yl)-*N*-[(3*α*,5*β*,12*α*)-3,12-dihydroxycholan-24-yl]-benzamide (1ab)**

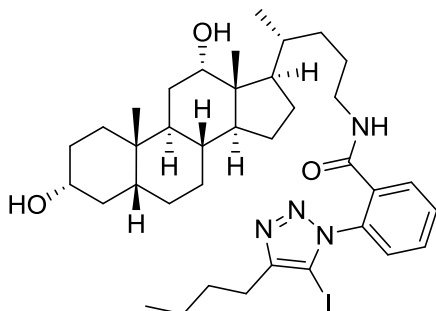

Prepared from carboxylic acid **S4** (222.7 mg, 0.6 mmol) and (3*α*,5*β*,12*α*)-24-aminocholan-3,12-diol<sup>5</sup> (271.9 mg, 0.72 mmol, 1.2 equiv) according to **GP5**; eluent: CH<sub>2</sub>Cl<sub>2</sub>–MeOH = 20:1. Yield 284 mg (65%). Pale yellow solid; mp 124–126 °C.

<sup>1</sup>H NMR (400 MHz, CDCl<sub>3</sub>) δ 7.86 (m, 1H), 7.65 (m, 1H),



7.62 (m, 1H), 7.32 (m, 1H), 5.96 (br t,  $J = 5.6$  Hz, 1H), 3.96 (m, 1H), 3.59 (tt,  $J = 11.0, 4.7$  Hz, 1H), 3.18–3.03 (m, 2H), 2.74 (m, 2H), 1.99–0.81 (m, 35H), 0.98 (t,  $J = 7.4$  Hz, 3H), 0.90 (s, 3H), 0.66 (s, 3H).

$^{13}\text{C}\{^1\text{H}\}$  NMR (100 MHz,  $\text{CDCl}_3$ )  $\delta$  165.1 ( $\text{C}_{\text{quat}}$ ), 152.3 ( $\text{C}_{\text{quat}}$ ), 134.9 ( $\text{C}_{\text{quat}}$ ), 133.7 ( $\text{C}_{\text{quat}}$ ), 130.9, 130.7, 129.7, 128.2, 82.7 ( $\text{C}_{\text{quat}}$ ), 73.0, 71.5, 47.9, 47.2, 46.3, 42.0, 40.4, 36.3, 35.9, 35.3, 35.2, 34.0, 33.4, 32.7, 31.0, 30.2, 28.3, 27.5, 27.1, 26.0, 26.0, 25.7, 23.6, 23.0, 22.2, 17.4, 13.7, 12.5.

HRMS (MALDI-TOF) calcd for  $\text{C}_{37}\text{H}_{56}\text{IN}_4\text{O}_3$   $[\text{M}+\text{H}]^+$  731.3392; found 731.3396.

### Synthesis of [1,2,3]triazolo[1,5-*a*]quinazolin-5(4*H*)-ones **2**

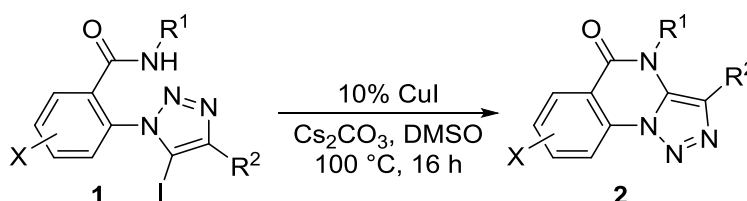

**General procedure 6 (GP6).** In a vial with screw cap, 2-(5-iodotriazolyl)benzamide **1** (0.20 mmol, 1 equiv), CuI (3.8 mg, 0.020 mmol, 10 mol %), and  $\text{Cs}_2\text{CO}_3$  (130.3 mg, 0.40 mmol, 2 equiv) were mixed under an Ar atmosphere in DMSO (2 mL). The reaction mixture was stirred at 100 °C in a dry block for 16 h, then diluted with  $\text{CH}_2\text{Cl}_2$  (20 mL), washed with EDTA solution (20 mL) and water ( $4 \times 20$  mL). The organic layer was dried with anhydrous  $\text{Na}_2\text{SO}_4$ , and the solvent was evaporated *in vacuo*. The residue was subjected to column chromatography on silica gel to afford pure triazole-fused lactam **2**.

### 3-Butyl-4-methyl[1,2,3]triazolo[1,5-*a*]quinazolin-5(4*H*)-one (**2a**)

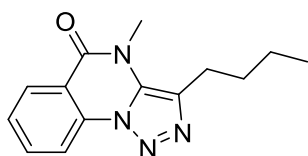

Prepared from iodotriazole **1a** (76.8 mg, 0.2 mmol) according to **GP6**; eluent: hexanes–EtOAc = 4:1. Yield 51.0 mg (99%). White solid; mp 97–98 °C.

$^1\text{H}$  NMR (400 MHz,  $\text{CDCl}_3$ )  $\delta$  8.34 (br d,  $J = 8.3$  Hz, 1H), 8.29 (dd,  $J = 7.9, 1.4$  Hz, 1H), 7.81 (ddd,  $J = 8.3, 7.4, 1.4$  Hz, 1H), 7.53 (m, 1H), 3.76 (s, 3H), 3.00 (m, 2H), 1.77 (m, 2H), 1.46 (m, 2H), 0.97 (t,  $J = 7.3$  Hz, 3H).

$^{13}\text{C}\{^1\text{H}\}$  NMR (100 MHz,  $\text{CDCl}_3$ )  $\delta$  158.9 ( $\text{C}_{\text{quat}}$ ), 134.9, 134.5 ( $\text{C}_{\text{quat}}$ ), 132.5 ( $\text{C}_{\text{quat}}$ ), 130.3 ( $\text{C}_{\text{quat}}$ ), 129.1, 127.5, 115.9 ( $\text{C}_{\text{quat}}$ ), 115.3, 33.1, 30.6, 25.9, 22.3, 13.8.

IR (KBr,  $\text{cm}^{-1}$ )  $\nu$  2954, 2925, 2870, 1670, 1622, 1604, 1574, 1516, 1485, 1469, 1454, 1387, 1334, 1317, 1244, 1136, 1099, 1072, 995, 781, 762, 685.

HRMS (MALDI-TOF) calcd for  $\text{C}_{14}\text{H}_{17}\text{N}_4\text{O}$   $[\text{M}+\text{H}]^+$  257.1397; found 257.1389.

### 3-Butyl-7-bromo-4-methyl[1,2,3]triazolo[1,5-*a*]quinazolin-5(4*H*)-one (2b)

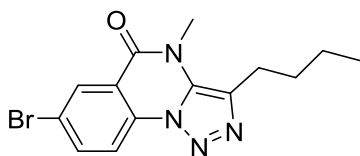

Prepared from iodotriazole **1b** (92.6 mg, 0.2 mmol) according to **GP6**; eluent: hexanes–EtOAc = 2:1. Yield 58 mg (87%). Pale pink solid; mp 150–152 °C.

$^1\text{H}$  NMR (400 MHz,  $\text{CDCl}_3$ )  $\delta$  8.42 (d,  $J = 2.1$  Hz, 1H), 8.23 (d,  $J = 8.7$  Hz, 1H), 7.91 (dd,  $J = 8.7, 2.1$  Hz, 1H), 3.77 (s, 3H), 3.00 (m, 2H), 1.78 (m, 2H), 1.47 (m, 2H), 0.99 (t,  $J = 7.3$  Hz, 3H).

$^{13}\text{C}\{^1\text{H}\}$  NMR (100 MHz,  $\text{CDCl}_3$ )  $\delta$  157.7 ( $\text{C}_{\text{quat}}$ ), 137.9, 133.3 ( $\text{C}_{\text{quat}}$ ), 132.3 ( $\text{C}_{\text{quat}}$ ), 131.8, 130.5 ( $\text{C}_{\text{quat}}$ ), 121.1 ( $\text{C}_{\text{quat}}$ ), 117.3 ( $\text{C}_{\text{quat}}$ ), 117.1, 33.0, 30.7, 25.8, 22.3, 13.8.

HRMS (MALDI-TOF) calcd for  $\text{C}_{14}\text{H}_{16}\text{BrN}_4\text{O}$   $[\text{M}+\text{H}]^+$  335.0502; found 335.0504.

### 3-Butyl-7-iodo-4-methyl[1,2,3]triazolo[1,5-*a*]quinazolin-5(4*H*)-one (2c)

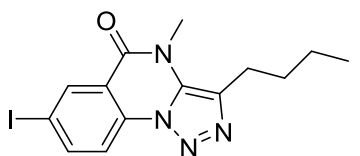

Prepared from iodotriazole **1c** (102.0 mg, 0.2 mmol) according to **GP6**; eluent: hexanes–EtOAc = 2:1. Yield 62 mg (81%). White solid; mp 131–133 °C.

$^1\text{H}$  NMR (400 MHz,  $\text{CDCl}_3$ )  $\delta$  8.62 (m, 1H), 8.12–8.06 (m, 2H), 3.76 (s, 3H), 3.00 (m, 2H), 1.78 (m, 2H), 1.47 (m, 2H), 0.98 (t,  $J = 7.3$  Hz, 3H).

$^{13}\text{C}\{^1\text{H}\}$  NMR (100 MHz,  $\text{CDCl}_3$ )  $\delta$  157.5 ( $\text{C}_{\text{quat}}$ ), 143.5, 137.8, 133.9 ( $\text{C}_{\text{quat}}$ ), 132.3 ( $\text{C}_{\text{quat}}$ ), 130.5 ( $\text{C}_{\text{quat}}$ ), 117.3 ( $\text{C}_{\text{quat}}$ ), 117.0, 91.7 ( $\text{C}_{\text{quat}}$ ), 33.0, 30.7, 25.8, 22.3, 13.8.

HRMS (MALDI-TOF) calcd for  $\text{C}_{14}\text{H}_{16}\text{IN}_4\text{O}$   $[\text{M}+\text{H}]^+$  383.0363; found 383.0362.

### 3-Butyl-8-methoxy-4-methyl[1,2,3]triazolo[1,5-*a*]quinazolin-5(4*H*)-one (2d)

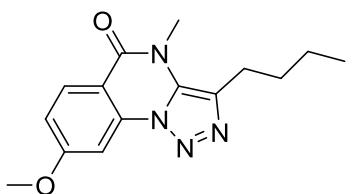

Prepared from iodotriazole **1d** (82.8 mg, 0.2 mmol) according to **GP6**; eluent: hexanes–EtOAc = 2:1. Yield 37.5 mg (65%). Yellow solid; mp 84–86 °C.

$^1\text{H}$  NMR (400 MHz,  $\text{CDCl}_3$ )  $\delta$  8.17 (d,  $J = 8.9$  Hz, 1H), 7.73 (d,  $J = 2.4$  Hz, 1H), 7.04 (dd,  $J = 8.9, 2.4$  Hz, 1H), 3.99 (s, 3H), 3.75 (s, 3H), 3.01 (m, 2H), 1.78 (m, 2H), 1.48 (m, 2H), 0.99 (t,  $J = 7.4$  Hz, 3H).

$^{13}\text{C}\{^1\text{H}\}$  NMR (100 MHz,  $\text{CDCl}_3$ )  $\delta$  164.8 ( $\text{C}_{\text{quat}}$ ), 158.7 ( $\text{C}_{\text{quat}}$ ), 136.1 ( $\text{C}_{\text{quat}}$ ), 132.9 ( $\text{C}_{\text{quat}}$ ), 130.8, 130.2 ( $\text{C}_{\text{quat}}$ ), 116.3, 108.8 ( $\text{C}_{\text{quat}}$ ), 97.7, 56.1, 33.1, 30.3, 25.9, 22.3, 13.8.

HRMS (MALDI-TOF) calcd for  $\text{C}_{15}\text{H}_{19}\text{N}_4\text{O}_2$   $[\text{M}+\text{H}]^+$  287.1503; found 287.1506.

### 3-Butyl-4,6-dimethyl[1,2,3]triazolo[1,5-*a*]quinazolin-5(4*H*)-one (2e)

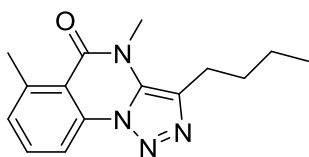

Prepared from iodotriazole **1e** (79.6 mg, 0.2 mmol) according to **GP6**; eluent: hexanes–EtOAc = 2:1. Yield 18 mg (33%). Beige solid; mp 94–96 °C.

$^1\text{H}$  NMR (400 MHz,  $\text{CDCl}_3$ )  $\delta$  8.30 (m, 1H), 7.66 (m, 1H), 7.33 (m, 1H), 3.72 (s, 3H), 3.00 (m, 2H), 2.88 (s, 3H), 1.77 (m, 2H), 1.47 (m, 2H), 0.98 (t,  $J = 7.3$  Hz, 3H).

$^{13}\text{C}\{^1\text{H}\}$  NMR (100 MHz,  $\text{CDCl}_3$ )  $\delta$  159.7 ( $\text{C}_{\text{quat}}$ ), 143.4 ( $\text{C}_{\text{quat}}$ ), 135.8 ( $\text{C}_{\text{quat}}$ ), 134.0, 133.1 ( $\text{C}_{\text{quat}}$ ), 132.4 ( $\text{C}_{\text{quat}}$ ), 130.9, 129.6 ( $\text{C}_{\text{quat}}$ ), 113.5, 33.1, 30.4, 25.9, 23.2, 22.3, 13.8.

HRMS (MALDI-TOF) calcd for  $\text{C}_{15}\text{H}_{19}\text{N}_4\text{O}$   $[\text{M}+\text{H}]^+$  271.1553; found 271.1556.

### 3-Butyl-4,9-dimethyl[1,2,3]triazolo[1,5-*a*]quinazolin-5(4*H*)-one (2f)

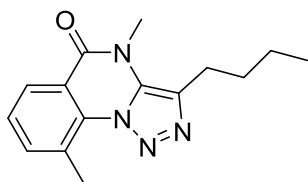

Prepared from iodotriazole **1f** (79.6 mg, 0.2 mmol) according to **GP6**; eluent: hexanes–EtOAc = 2:1. Yield 45 mg (83%). White solid; mp 114–116 °C.

$^1\text{H}$  NMR (400 MHz,  $\text{CDCl}_3$ )  $\delta$  8.20 (m, 1H), 7.63 (m, 1H), 7.41 (m, 1H), 3.78 (s, 3H), 3.03 (m, 2H), 2.96 (s, 3H), 1.80 (m, 2H), 1.48 (m, 2H), 0.99 (t,  $J = 7.4$  Hz, 3H).

$^{13}\text{C}\{^1\text{H}\}$  NMR (100 MHz,  $\text{CDCl}_3$ )  $\delta$  159.2 ( $\text{C}_{\text{quat}}$ ), 138.1, 133.6 ( $\text{C}_{\text{quat}}$ ), 132.8 ( $\text{C}_{\text{quat}}$ ), 128.9 ( $\text{C}_{\text{quat}}$ ), 128.6 ( $\text{C}_{\text{quat}}$ ), 127.0, 126.8, 117.1 ( $\text{C}_{\text{quat}}$ ), 33.0, 30.7, 25.9, 23.4, 22.3, 13.8.

HRMS (MALDI-TOF) calcd for  $\text{C}_{15}\text{H}_{19}\text{N}_4\text{O}$   $[\text{M}+\text{H}]^+$  271.1553; found 271.1555.

### 3-*tert*-Butyl-4-methyl[1,2,3]triazolo[1,5-*a*]quinazolin-5(4*H*)-one (2g)

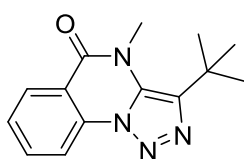

Prepared from iodotriazole **1g** (76.8 mg, 0.2 mmol) according to **GP6**; eluent: hexanes–EtOAc = 2:1. Yield 39 mg (76%). White solid; mp 140–142 °C.

$^1\text{H}$  NMR (400 MHz,  $\text{CDCl}_3$ )  $\delta$  8.41 (br d,  $J = 8.2$  Hz, 1H), 8.31 (br d,  $J = 7.9$  Hz, 1H), 7.83 (m, 1H), 7.56 (m, 1H), 3.89 (s, 3H), 1.61 (s, 9H).

$^{13}\text{C}\{^1\text{H}\}$  NMR (100 MHz,  $\text{CDCl}_3$ )  $\delta$  160.0 ( $\text{C}_{\text{quat}}$ ), 138.0 ( $\text{C}_{\text{quat}}$ ), 134.9, 134.8 ( $\text{C}_{\text{quat}}$ ), 133.1 ( $\text{C}_{\text{quat}}$ ), 128.9, 127.6, 115.5 (2C, CH +  $\text{C}_{\text{quat}}$ ), 35.3, 32.2 (3C), 31.8 ( $\text{C}_{\text{quat}}$ ).

HRMS (MALDI-TOF) calcd for  $\text{C}_{14}\text{H}_{17}\text{N}_4\text{O}$   $[\text{M}+\text{H}]^+$  257.1397; found 257.1402.

### 4-Methyl-3-phenyl[1,2,3]triazolo[1,5-*a*]quinazolin-5(4*H*)-one (2h)

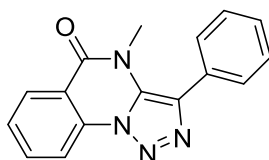

Prepared from iodotriazole **1h** (80.8 mg, 0.2 mmol) according to **GP6**; eluent: hexanes–EtOAc = 2:1. Yield 41.6 mg (75%). The reaction performed with 1.451 g (3.59 mmol) of **1h** afforded 806.1 mg (81%) of **2h**. White solid; mp 195–196 °C (lit.<sup>6</sup> 200 °C (dec.)).

$^1\text{H}$  NMR (400 MHz,  $\text{CDCl}_3$ )  $\delta$  8.39 (br d,  $J = 8.2$  Hz, 1H), 8.31 (br d,  $J = 7.9$  Hz, 1H), 7.86 (m, 1H), 7.61–7.54 (m, 3H), 7.53–7.44 (m, 3H), 3.41 (s, 3H).

$^{13}\text{C}\{^1\text{H}\}$  NMR (100 MHz,  $\text{CDCl}_3$ )  $\delta$  158.9 ( $\text{C}_{\text{quat}}$ ), 135.0, 134.4 ( $\text{C}_{\text{quat}}$ ), 132.6 ( $\text{C}_{\text{quat}}$ ), 131.0 ( $\text{C}_{\text{quat}}$ ), 130.6 (2C), 130.3 ( $\text{C}_{\text{quat}}$ ), 129.0, 128.8, 128.3 (2C), 127.8, 115.9 ( $\text{C}_{\text{quat}}$ ), 115.3, 32.3.

HRMS (MALDI-TOF) calcd for  $\text{C}_{16}\text{H}_{12}\text{N}_4\text{KO}$   $[\text{M}+\text{K}]^+$  315.0643; found 315.0645.

#### 4-Methyl-3-[2-(trifluoromethyl)phenyl][1,2,3]triazolo[1,5-*a*]quinazolin-5(4*H*)-one (2i)

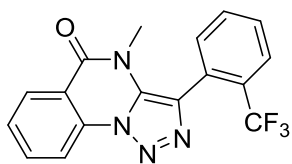

Prepared from iodotriazole **1i** (94.4 mg, 0.2 mmol) according to **GP6**; eluent: hexanes–EtOAc = 2:1. Yield 68.5 mg (99%). White solid; mp 185–187 °C.

$^1\text{H}$  NMR (400 MHz,  $\text{CDCl}_3$ )  $\delta$  8.46 (br d,  $J = 8.2$  Hz, 1H), 8.36 (m, 1H), 7.90 (m, 1H), 7.86 (m, 1H), 7.72–7.56 (m, 4H), 3.23 (s, 3H).

$^{13}\text{C}\{^1\text{H}\}$  NMR (100 MHz,  $\text{CDCl}_3$ )  $\delta$  158.8 ( $\text{C}_{\text{quat}}$ ), 135.1, 134.4 ( $\text{C}_{\text{quat}}$ ), 134.0, 133.5 ( $\text{C}_{\text{quat}}$ ), 131.6, 131.2 (q,  $J_{\text{CF}} = 29.3$  Hz,  $\text{C}_{\text{quat}}$ ), 129.9, 129.2, 128.9 ( $\text{C}_{\text{quat}}$ ), 127.9, 126.7 ( $\text{C}_{\text{quat}}$ ), 126.3, 123.6 (q,  $J_{\text{CF}} = 273$  Hz,  $\text{CF}_3$ ), 116.0 ( $\text{C}_{\text{quat}}$ ), 115.4, 31.3.

HRMS (MALDI-TOF) calcd for  $\text{C}_{17}\text{H}_{12}\text{F}_3\text{N}_4\text{O}$   $[\text{M}+\text{H}]^+$  345.0958; found 345.0961.

#### 4-Methyl[1,2,3]triazolo[1,5-*a*]quinazolin-5(4*H*)-one (2j)

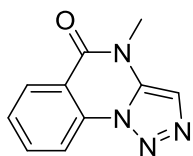

Prepared from iodotriazole **1j** (77.2 mg, 0.2 mmol) according to **GP6**; eluent:  $\text{CH}_2\text{Cl}_2$ –EtOAc = 2:1. Yield 30.0 mg (75%). Off-white solid; mp 215–216 °C.

$^1\text{H}$  NMR (400 MHz,  $\text{CDCl}_3$ – $\text{CD}_3\text{OD}$ )  $\delta$  8.39 (br d,  $J = 8.3$  Hz, 1H), 8.36 (m, 1H), 7.91 (m, 1H), 7.63 (m, 1H), 7.53 (s, 1H), 3.66 (s, 3H).

$^{13}\text{C}\{^1\text{H}\}$  NMR (100 MHz,  $\text{CDCl}_3$ – $\text{CD}_3\text{OD}$ )  $\delta$  158.5 ( $\text{C}_{\text{quat}}$ ), 137.0 ( $\text{C}_{\text{quat}}$ ), 135.1, 134.2 ( $\text{C}_{\text{quat}}$ ), 129.1, 128.0, 116.4, 116.0 ( $\text{C}_{\text{quat}}$ ), 115.2, 31.4.

HRMS (ESI-TOF) calcd for  $\text{C}_{10}\text{H}_9\text{N}_4\text{O}$   $[\text{M}+\text{H}]^+$  201.0771; found 201.0775.

#### 3-(2-Hydroxyethyl)-4-methyl[1,2,3]triazolo[1,5-*a*]quinazolin-5(4*H*)-one (2k)

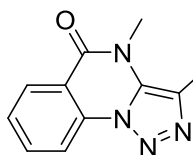

Prepared from iodotriazole **1k** (111.7 mg, 0.3 mmol) according to **GP6**; eluent:  $\text{CH}_2\text{Cl}_2$ –MeOH = 20:1. Yield 57.8 mg (79%). White solid; mp 216–219 °C.

$^1\text{H}$  NMR (400 MHz,  $\text{DMSO}-d_6$ – $\text{CDCl}_3 = 3:1 + \text{CD}_3\text{OD}$ )  $\delta$  8.31 (d,  $J = 8.2$  Hz, 1H), 8.24 (dd,  $J = 7.9, 1.2$  Hz, 1H), 7.92 (m, 1H), 7.62 (m, 1H), 4.76 (br t,  $J = 5.7$  Hz, 0.5H due to H/D exchange), 3.78 (m, 2H), 3.77 (s, 3H), 3.15 (t,  $J = 6.5$  Hz, 2H).

$^{13}\text{C}\{^1\text{H}\}$  NMR (100 MHz,  $\text{DMSO}-d_6$ – $\text{CDCl}_3 = 3:1 + \text{CD}_3\text{OD}$ )  $\delta$  158.0 ( $\text{C}_{\text{quat}}$ ), 134.8, 134.0 ( $\text{C}_{\text{quat}}$ ), 133.6 ( $\text{C}_{\text{quat}}$ ), 128.6, 127.39 ( $\text{C}_{\text{quat}}$ ), 127.37, 115.6 ( $\text{C}_{\text{quat}}$ ), 114.6, 61.2 and 61.1 ( $\text{CH}_2\text{OH/D}$ ), 30.2, 29.1 and 29.0 ( $\text{CH}_2\text{CH}_2\text{OH/D}$ ).

HRMS (MALDI-TOF) calcd for  $\text{C}_{12}\text{H}_{13}\text{N}_4\text{O}_2$   $[\text{M}+\text{H}]^+$  245.1033; found 245.1036.

#### 3-(4-*tert*-Butylphenyl)-4-methyl[1,2,3]triazolo[1,5-*a*]quinazolin-5(4*H*)-one (2l)

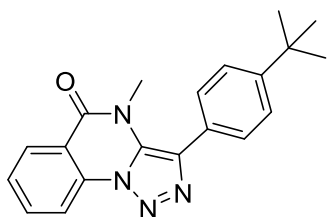

Prepared from iodotriazole **1l** (92.1 mg, 0.2 mmol) according to **GP6**; eluent: hexanes–EtOAc = 2:1. Yield 66.1 mg (99%). White solid; mp 183–185 °C.

$^1\text{H}$  NMR (400 MHz,  $\text{CDCl}_3$ )  $\delta$  8.42 (br d,  $J = 8.2$  Hz, 1H), 8.31 (br d,

$J = 7.8$  Hz, 1H), 7.87 (m, 1H), 7.58 (m, 1H), 7.53–7.47 (m, 4H), 3.45 (s, 3H), 1.38 (s, 9H).

$^{13}\text{C}\{^1\text{H}\}$  NMR (100 MHz,  $\text{CDCl}_3$ )  $\delta$  159.0 ( $\text{C}_{\text{quat}}$ ), 151.9 ( $\text{C}_{\text{quat}}$ ), 135.0, 134.5 ( $\text{C}_{\text{quat}}$ ), 132.5 ( $\text{C}_{\text{quat}}$ ), 131.1 ( $\text{C}_{\text{quat}}$ ), 130.3 (2C), 129.1, 127.7, 127.2 ( $\text{C}_{\text{quat}}$ ), 125.3 (2C), 115.9 ( $\text{C}_{\text{quat}}$ ), 115.4, 34.7 ( $\text{C}_{\text{quat}}$ ), 32.4, 31.3 (3C).

HRMS (MALDI-TOF) calcd for  $\text{C}_{20}\text{H}_{21}\text{N}_4\text{O}$   $[\text{M}+\text{H}]^+$  333.1710; found 333.1701.

### 3-(4-Methoxyphenyl)-4-methyl[1,2,3]triazolo[1,5-*a*]quinazolin-5(4*H*)-one (2m)

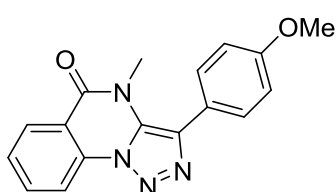

Prepared from iodotriazole **1m** (52.1 mg, 0.12 mmol) according to **GP6**; eluent: hexanes–EtOAc = 2:1. Yield 36.1 mg (98%). White solid; mp 204–205 °C.

$^1\text{H}$  NMR (400 MHz,  $\text{CDCl}_3$ )  $\delta$  8.42 (br d,  $J = 8.2$  Hz, 1H), 8.33 (m, 1H), 7.87 (m, 1H), 7.59 (m, 1H), 7.50–7.45 (m, 2H), 7.04–6.99 (m, 2H), 3.88 (s, 3H), 3.42 (s, 3H).

$^{13}\text{C}\{^1\text{H}\}$  NMR (100 MHz,  $\text{CDCl}_3$ )  $\delta$  160.0 ( $\text{C}_{\text{quat}}$ ), 159.0 ( $\text{C}_{\text{quat}}$ ), 135.0, 134.5 ( $\text{C}_{\text{quat}}$ ), 132.5 ( $\text{C}_{\text{quat}}$ ), 131.9 (2C), 130.8 ( $\text{C}_{\text{quat}}$ ), 129.1, 127.7, 122.4 ( $\text{C}_{\text{quat}}$ ), 115.9 ( $\text{C}_{\text{quat}}$ ), 115.3, 113.8 (2C), 55.3, 32.1.

HRMS (MALDI-TOF) calcd for  $\text{C}_{17}\text{H}_{15}\text{N}_4\text{O}_2$   $[\text{M}+\text{H}]^+$  307.1190; found 307.1193.

### Methyl 3-(4-methyl-5-oxo-4,5-dihydro[1,2,3]triazolo[1,5-*a*]quinazolin-3-yl)benzoate (2n)

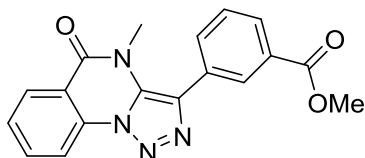

Prepared from iodotriazole **1n** (69.3 mg, 0.15 mmol) according to **GP6**; eluent: hexanes–EtOAc = 1:1. Yield 37.6 mg (75%). White solid; mp 179–181 °C.

$^1\text{H}$  NMR (400 MHz,  $\text{CDCl}_3$ )  $\delta$  8.44 (br d,  $J = 8.2$  Hz, 1H), 8.36 (dd,  $J = 8.0, 1.4$  Hz, 1H), 8.24 (m, 1H), 8.16 (m, 1H), 7.90 (ddd,  $J = 8.2, 7.5, 1.4$  Hz, 1H), 7.81 (ddd,  $J = 7.6, 1.7, 1.2$  Hz, 1H), 7.64–7.57 (m, 2H), 3.95 (s, 3H), 3.43 (s, 3H).

$^{13}\text{C}\{^1\text{H}\}$  NMR (100 MHz,  $\text{CDCl}_3$ )  $\delta$  166.4 ( $\text{C}_{\text{quat}}$ ), 158.9 ( $\text{C}_{\text{quat}}$ ), 135.1, 134.8, 134.4 ( $\text{C}_{\text{quat}}$ ), 133.0 ( $\text{C}_{\text{quat}}$ ), 131.6, 130.7 ( $\text{C}_{\text{quat}}$ ), 130.3 ( $\text{C}_{\text{quat}}$ ), 130.0 ( $\text{C}_{\text{quat}}$ ), 129.9, 129.2, 128.6, 128.0, 115.9 ( $\text{C}_{\text{quat}}$ ), 115.4, 52.3, 32.5.

HRMS (MALDI-TOF) calcd for  $\text{C}_{18}\text{H}_{15}\text{N}_4\text{O}_3$   $[\text{M}+\text{H}]^+$  335.1139; found 335.1138.

### 3-(4-Acetylphenyl)-4-methyl[1,2,3]triazolo[1,5-*a*]quinazolin-5(4*H*)-one (2o)

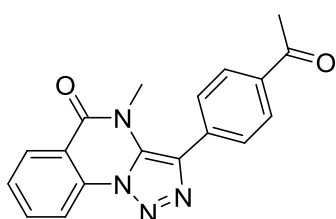

Prepared from iodotriazole **1o** (66.9 mg, 0.15 mmol) according to **GP6**; eluent: hexanes–EtOAc = 1:1. Yield 27.6 mg (58%). White solid; mp 223–224 °C.

$^1\text{H}$  NMR (400 MHz,  $\text{CDCl}_3$ – $\text{CD}_3\text{OD}$ )  $\delta$  8.44 (br d,  $J = 8.2$  Hz, 1H), 8.36 (dd,  $J = 8.0, 1.4$  Hz, 1H), 8.11–8.07 (m, 2H), 7.91 (ddd,  $J = 8.2, 7.5, 1.4$  Hz, 1H), 7.72–7.68 (m, 2H), 7.64 (m, 1H), 3.45 (s, 3H), 2.69 (s, 3H).

$^{13}\text{C}\{^1\text{H}\}$  NMR (100 MHz,  $\text{CDCl}_3\text{-CD}_3\text{OD}$ )  $\delta$  197.7 ( $\text{C}_{\text{quat}}$ ), 159.0 ( $\text{C}_{\text{quat}}$ ), 136.9 ( $\text{C}_{\text{quat}}$ ), 135.2, 134.9 ( $\text{C}_{\text{quat}}$ ), 134.3 ( $\text{C}_{\text{quat}}$ ), 133.0 ( $\text{C}_{\text{quat}}$ ), 130.7 (2C), 130.0 ( $\text{C}_{\text{quat}}$ ), 129.1, 128.3 (2C), 128.1, 115.9 ( $\text{C}_{\text{quat}}$ ), 115.4, 32.7, 26.6.

HRMS (MALDI-TOF) calcd for  $\text{C}_{18}\text{H}_{15}\text{N}_4\text{O}_2$   $[\text{M}+\text{H}]^+$  319.1190; found 319.1184.

### 3-Butyl[1,2,3]triazolo[1,5-*a*]quinazolin-5(4*H*)-one (2p)

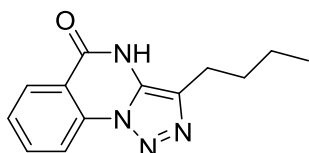

Prepared from iodotriazole **1p** (55.5 mg, 0.15 mmol) according to **GP6**; eluent:  $\text{CH}_2\text{Cl}_2\text{-MeOH}$  = 20:1. Yield 24.7 mg (68%). White solid; mp 238–240 °C.

$^1\text{H}$  NMR (400 MHz,  $\text{CDCl}_3\text{-CD}_3\text{OD}$ )  $\delta$  8.36 (br d,  $J$  = 8.2 Hz, 1H), 8.31 (dd,  $J$  = 8.0, 1.2 Hz, 1H), 7.88 (m, 1H), 7.59 (m, 1H), 2.82 (m, 2H), 1.72 (m, 2H), 1.42 (m, 2H), 0.95 (t,  $J$  = 7.3 Hz, 3H).

$^{13}\text{C}\{^1\text{H}\}$  NMR (100 MHz,  $\text{CDCl}_3\text{-CD}_3\text{OD}$ )  $\delta$  159.8 ( $\text{C}_{\text{quat}}$ ), 135.2, 135.0 ( $\text{C}_{\text{quat}}$ ), 131.0 ( $\text{C}_{\text{quat}}$ ), 129.5 ( $\text{C}_{\text{quat}}$ ), 128.7, 127.6, 116.3 ( $\text{C}_{\text{quat}}$ ), 115.2, 30.9, 23.2, 22.0, 13.4.

IR (KBr,  $\text{cm}^{-1}$ )  $\nu$  2958, 2924, 2873, 2858, 2823, 1670, 1651, 1628, 1614, 1574, 1520, 1483, 1456, 1396, 1383, 1350, 1321, 1238, 1227, 1147, 849, 756, 696, 640, 536.

HRMS (MALDI-TOF) calcd for  $\text{C}_{13}\text{H}_{15}\text{N}_4\text{O}$   $[\text{M}+\text{H}]^+$  243.1240; found 243.1245.

### 3-Butyl-4-(4-methylphenyl)[1,2,3]triazolo[1,5-*a*]quinazolin-5(4*H*)-one (2q)

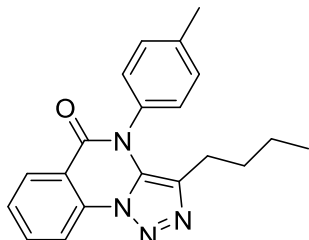

Prepared from iodotriazole **1q** (46.0 mg, 0.1 mmol) according to **GP6**; eluent: hexanes–EtOAc = 4:1. Yield 23.1 mg (69%). White solid; mp 134–135 °C.

$^1\text{H}$  NMR (400 MHz,  $\text{CDCl}_3$ )  $\delta$  8.43 (br d,  $J$  = 8.2 Hz, 1H), 8.34 (br d,  $J$  = 7.9 Hz, 1H), 7.86 (m, 1H), 7.56 (m, 1H), 7.39–7.33 (m, 2H), 7.28–7.22 (m, 2H), 2.45 (s, 3H), 1.89 (m, 2H), 1.30 (m, 2H), 1.04 (m, 2H), 0.70 (t,  $J$  = 7.3 Hz, 3H).

$^{13}\text{C}\{^1\text{H}\}$  NMR (100 MHz,  $\text{CDCl}_3$ )  $\delta$  159.2 ( $\text{C}_{\text{quat}}$ ), 140.2 ( $\text{C}_{\text{quat}}$ ), 135.2, 135.1 ( $\text{C}_{\text{quat}}$ ), 132.8 ( $\text{C}_{\text{quat}}$ ), 132.5 ( $\text{C}_{\text{quat}}$ ), 131.0 ( $\text{C}_{\text{quat}}$ ), 130.4 (2C), 129.6, 128.4 (2C), 127.6, 116.3 ( $\text{C}_{\text{quat}}$ ), 115.5, 31.9, 24.5, 22.3, 21.3, 13.5.

IR (KBr,  $\text{cm}^{-1}$ )  $\nu$  2952, 2925, 2862, 1678, 1618, 1601, 1568, 1512, 1483, 1385, 1319, 1308, 1284, 1171, 1136, 1107, 870, 816, 789, 760, 683.

Anal. calcd for  $\text{C}_{20}\text{H}_{20}\text{N}_4\text{O}$ : C, 72.27; H, 6.06; N, 16.86; found C, 71.92; H, 5.91; N, 16.60.

HRMS (MALDI-TOF) calcd for  $\text{C}_{20}\text{H}_{21}\text{N}_4\text{O}$   $[\text{M}+\text{H}]^+$  333.1710; found 333.1703.

### 3-Butyl-4-(4-methoxyphenyl)[1,2,3]triazolo[1,5-*a*]quinazolin-5(4*H*)-one (2r)

Prepared from iodotriazole **1r** (71.4 mg, 0.15 mmol) according to **GP6**; eluent: hexanes–EtOAc = 2:1. Yield 40.1 mg (77%). Beige solid; mp 153–155 °C.

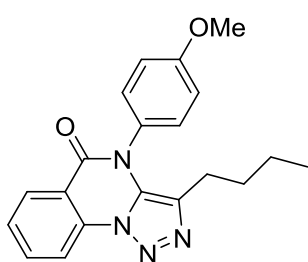

$^1\text{H}$  NMR (400 MHz,  $\text{CDCl}_3$ )  $\delta$  8.44 (br d,  $J = 8.2$  Hz, 1H), 8.35 (dd,  $J = 8.0, 1.1$  Hz, 1H), 7.88 (m, 1H), 7.58 (m, 1H), 7.35–7.29 (m, 2H), 7.11–7.06 (m, 2H), 3.90 (s, 3H), 1.95 (m, 2H), 1.34 (m, 2H), 1.09 (m, 2H), 0.75 (t,  $J = 7.4$  Hz, 3H).

$^{13}\text{C}\{^1\text{H}\}$  NMR (100 MHz,  $\text{CDCl}_3$ )  $\delta$  160.5 ( $\text{C}_{\text{quat}}$ ), 159.3 ( $\text{C}_{\text{quat}}$ ), 135.2, 135.0 ( $\text{C}_{\text{quat}}$ ), 132.6 ( $\text{C}_{\text{quat}}$ ), 131.0 ( $\text{C}_{\text{quat}}$ ), 129.7 (2C), 129.5, 127.9 ( $\text{C}_{\text{quat}}$ ), 127.6, 116.2 ( $\text{C}_{\text{quat}}$ ), 115.4, 115.0 (2C), 55.6, 31.9, 24.5, 22.2, 13.6.

HRMS (MALDI-TOF) calcd for  $\text{C}_{20}\text{H}_{21}\text{N}_4\text{O}_2$   $[\text{M}+\text{H}]^+$  349.1659; found 349.1660.

### 3-Butyl-4-cyclopropyl[1,2,3]triazolo[1,5-a]quinazolin-5(4H)-one (2s)

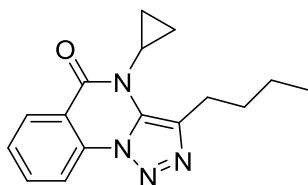

Prepared from iodotriazole **1s** (82.1 mg, 0.2 mmol) according to **GP6**; eluent: hexanes–EtOAc = 4:1. Yield 45.6 mg (81%). White solid; mp 125–127 °C.

$^1\text{H}$  NMR (600 MHz,  $\text{CDCl}_3$ )  $\delta$  8.34 (br d,  $J = 8.3$  Hz, 1H), 8.27 (dd,  $J = 7.9, 1.5$  Hz, 1H), 7.81 (m, 1H), 7.52 (m, 1H), 3.16 (tt,  $J = 6.9, 3.8$  Hz, 1H), 3.11 (m, 2H), 1.84 (m, 2H), 1.47 (m, 2H), 1.33–1.28 (m, 2H), 1.04–1.01 (m, 2H), 0.98 (t,  $J = 7.4$  Hz, 3H).

$^{13}\text{C}\{^1\text{H}\}$  NMR (151 MHz,  $\text{CDCl}_3$ )  $\delta$  160.0 ( $\text{C}_{\text{quat}}$ ), 134.8, 134.6 ( $\text{C}_{\text{quat}}$ ), 133.1 ( $\text{C}_{\text{quat}}$ ), 131.1 ( $\text{C}_{\text{quat}}$ ), 129.0, 127.4, 116.8 ( $\text{C}_{\text{quat}}$ ), 115.3, 32.5, 27.1, 25.8, 22.6, 13.9, 10.4 (2C).

HRMS (MALDI-TOF) calcd for  $\text{C}_{16}\text{H}_{19}\text{N}_4\text{O}$   $[\text{M}+\text{H}]^+$  283.1553; found 283.1552.

### 3-Butyl-4-cyclohexyl[1,2,3]triazolo[1,5-a]quinazolin-5(4H)-one (2t)

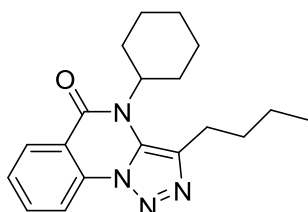

Prepared from iodotriazole **1t** (67.8 mg, 0.15 mmol) according to **GP6**; eluents: hexanes–EtOAc = 10:1 and 4:1. Yield 44.9 mg (92%). White solid; mp 108–110 °C.

$^1\text{H}$  NMR (400 MHz,  $\text{CDCl}_3$ )  $\delta$  8.33 (br d,  $J = 8.1$  Hz, 1H), 8.24 (dd,  $J = 8.0, 1.0$  Hz, 1H), 7.78 (m, 1H), 7.51 (m, 1H), 4.10 (tt,  $J = 12.0, 3.5$  Hz, 1H), 2.94 (m, 2H), 2.72 (m, 2H), 1.95 (m, 2H), 1.84 (m, 2H), 1.78–1.67 (m, 3H), 1.48 (m, 2H), 1.39–1.24 (m, 3H), 0.98 (t,  $J = 7.4$  Hz, 3H).

$^{13}\text{C}\{^1\text{H}\}$  NMR (100 MHz,  $\text{CDCl}_3$ )  $\delta$  159.2 ( $\text{C}_{\text{quat}}$ ), 134.6, 134.5 ( $\text{C}_{\text{quat}}$ ), 133.0 ( $\text{C}_{\text{quat}}$ ), 129.4 ( $\text{C}_{\text{quat}}$ ), 128.8, 127.5, 117.6 ( $\text{C}_{\text{quat}}$ ), 115.3, 60.9, 32.6, 29.0 (2C), 27.5, 26.4 (2C), 25.0, 22.6, 13.9.

HRMS (MALDI-TOF) calcd for  $\text{C}_{19}\text{H}_{25}\text{N}_4\text{O}$   $[\text{M}+\text{H}]^+$  325.2023; found 325.2030.

### 3-Butyl-4-[(1R)-1-phenylethyl][1,2,3]triazolo[1,5-a]quinazolin-5(4H)-one (2u)

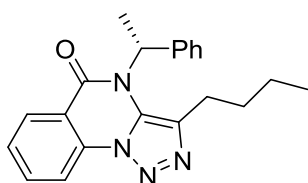

Prepared from iodotriazole **1u** (71.2 mg, 0.15 mmol) according to **GP6**; eluent: hexanes–EtOAc = 4:1. Yield 39.9 mg (77%). White solid; mp 194–195 °C.

$^1\text{H}$  NMR (400 MHz,  $\text{CDCl}_3$ )  $\delta$  8.42 (br d,  $J = 8.3$  Hz, 1H), 8.24 (br d,  $J$

= 8.0 Hz, 1H), 7.83 (m, 1H), 7.52 (m, 1H), 7.39–7.26 (m, 5H), 5.99 (br s, 1H), 2.87 (m, 1H), 2.75 (m, 1H), 2.06 (d,  $J = 7.0$  Hz, 3H), 1.77–1.50 (m, 2H), 1.40–1.27 (m, 2H), 0.88 (t,  $J = 7.3$  Hz, 3H).

$^{13}\text{C}\{^1\text{H}\}$  NMR (100 MHz,  $\text{CDCl}_3$ )  $\delta$  158.6 ( $\text{C}_{\text{quat}}$ ), 139.1 ( $\text{C}_{\text{quat}}$ ), 134.9, 134.6 ( $\text{C}_{\text{quat}}$ ), 132.5 ( $\text{C}_{\text{quat}}$ ), 129.8 ( $\text{C}_{\text{quat}}$ ), 129.1, 128.6 (2C), 127.5, 127.4, 125.9 (2C), 116.8 ( $\text{C}_{\text{quat}}$ ), 115.3, 55.4 (br), 32.0, 27.0, 22.4, 16.6, 13.7.

HRMS (MALDI-TOF) calcd for  $\text{C}_{21}\text{H}_{23}\text{N}_2\text{O}$  [ $\text{M}-\text{N}_2+\text{H}$ ] $^+$  319.1805; found 319.1808.

### 3-Butyl-4-(2-furylmethyl)[1,2,3]triazolo[1,5-*a*]quinazolin-5(4*H*)-one (2w)

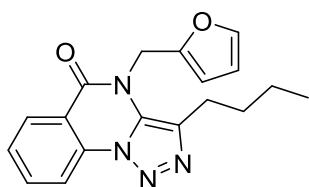

Prepared from iodotriazole **1w** (73.3 mg, 0.163 mmol) according to **GP6**; eluent: hexanes–EtOAc = 4:1. Yield 46.2 mg (88%). White solid; mp 108–109 °C.

$^1\text{H}$  NMR (400 MHz,  $\text{CDCl}_3$ )  $\delta$  8.32 (br d,  $J = 8.2$  Hz, 1H), 8.24 (dd,  $J = 8.1, 1.3$  Hz, 1H), 7.76 (m, 1H), 7.48 (m, 1H), 7.28 (m, 1H), 6.30 (d,  $J = 3.3$  Hz, 1H), 6.27 (dd,  $J = 3.3, 1.8$  Hz, 1H), 5.33 (s, 2H), 2.95 (m, 2H), 1.70 (m, 2H), 1.40 (m, 2H), 0.90 (t,  $J = 7.3$  Hz, 3H).

$^{13}\text{C}\{^1\text{H}\}$  NMR (100 MHz,  $\text{CDCl}_3$ )  $\delta$  158.7 ( $\text{C}_{\text{quat}}$ ), 148.6 ( $\text{C}_{\text{quat}}$ ), 142.5, 135.1, 134.8 ( $\text{C}_{\text{quat}}$ ), 131.9 ( $\text{C}_{\text{quat}}$ ), 130.2 ( $\text{C}_{\text{quat}}$ ), 129.3, 127.5, 115.8 ( $\text{C}_{\text{quat}}$ ), 115.4, 110.7, 108.9, 40.4, 32.4, 25.7, 22.4, 13.8. IR (KBr,  $\text{cm}^{-1}$ )  $\nu$  2952, 2922, 2858, 1674, 1620, 1599, 1566, 1510, 1450, 1309, 1240, 1159, 1144, 1068, 1007, 924, 795, 756, 681.

HRMS (MALDI-TOF) calcd for  $\text{C}_{18}\text{H}_{19}\text{N}_4\text{O}_2$  [ $\text{M}+\text{H}$ ] $^+$  323.1503; found 323.1495.

### 3-Butyl-4-[2-(5-methoxy-1*H*-indol-3-yl)ethyl][1,2,3]triazolo[1,5-*a*]quinazolin-5(4*H*)-one (2x)

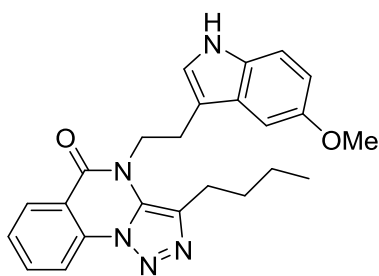

Prepared from iodotriazole **1x** (108.7 mg, 0.2 mmol) according to **GP6**; eluent:  $\text{CH}_2\text{Cl}_2$ –MeOH = 50:1. Yield 67 mg (81%). White solid; mp 239–240 °C.

$^1\text{H}$  NMR (400 MHz,  $\text{CDCl}_3$ )  $\delta$  8.41 (br d,  $J = 8.3$  Hz, 1H), 8.38 (dd,  $J = 8.0, 1.3$  Hz, 1H), 8.13 (br s, 1H), 7.85 (m, 1H), 7.58 (m, 1H), 7.26 (d,  $J = 8.9$  Hz, 1H), 7.19 (d,  $J = 2.3$  Hz, 1H), 7.07 (d,  $J = 1.9$  Hz, 1H), 6.86 (dd,  $J = 8.9, 2.3$  Hz, 1H), 4.49 (m, 2H), 3.86 (s, 3H), 3.20 (m, 2H), 2.93 (m, 2H), 1.77 (m, 2H), 1.40 (m, 2H), 0.91 (t,  $J = 7.3$  Hz, 3H).

$^{13}\text{C}\{^1\text{H}\}$  NMR (100 MHz,  $\text{CDCl}_3$ )  $\delta$  158.8 ( $\text{C}_{\text{quat}}$ ), 154.2 ( $\text{C}_{\text{quat}}$ ), 134.9, 134.7 ( $\text{C}_{\text{quat}}$ ), 132.0 ( $\text{C}_{\text{quat}}$ ), 131.3 ( $\text{C}_{\text{quat}}$ ), 129.4 ( $\text{C}_{\text{quat}}$ ), 129.1, 127.63 ( $\text{C}_{\text{quat}}$ ), 127.58, 122.4, 116.1 ( $\text{C}_{\text{quat}}$ ), 115.4, 112.8, 112.0, 111.3 ( $\text{C}_{\text{quat}}$ ), 100.3, 55.8, 44.4, 32.6, 26.0, 24.5, 22.5, 13.8.

HRMS (MALDI-TOF) calcd for  $\text{C}_{24}\text{H}_{26}\text{N}_3\text{O}_2$  [ $\text{M}-\text{N}_2+\text{H}$ ] $^+$  388.2020; found 388.2022.



### 3-Butyl-4-[2-(3,5-dimethylisoxazol-4-yl)ethyl][1,2,3]triazolo[1,5-*a*]quinazolin-5(4*H*)-one

(2y)

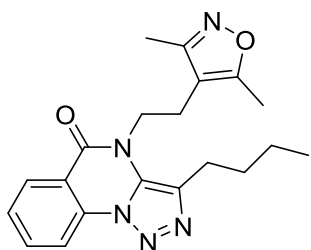

Prepared from iodotriazole **1y** (98.7 mg, 0.2 mmol) according to **GP6**; eluent: hexanes–EtOAc = 2:1. Yield 68 mg (93%). White solid; mp 169–171 °C.

$^1\text{H}$  NMR (400 MHz,  $\text{CDCl}_3$ )  $\delta$  8.40 (br d,  $J = 8.3$  Hz, 1H), 8.32 (br d,  $J = 7.8$  Hz, 1H), 7.87 (m, 1H), 7.59 (m, 1H), 4.26 (m, 2H), 2.97 (m, 2H),

2.78 (m, 2H), 2.35 (s, 6H), 1.84 (m, 2H), 1.48 (m, 2H), 0.99 (t,  $J = 7.4$  Hz, 3H).

$^{13}\text{C}\{^1\text{H}\}$  NMR (100 MHz,  $\text{CDCl}_3$ )  $\delta$  166.0 ( $\text{C}_{\text{quat}}$ ), 159.4 ( $\text{C}_{\text{quat}}$ ), 158.8 ( $\text{C}_{\text{quat}}$ ), 135.2, 134.6 ( $\text{C}_{\text{quat}}$ ), 131.6 ( $\text{C}_{\text{quat}}$ ), 129.05, 128.96 ( $\text{C}_{\text{quat}}$ ), 127.7, 115.7 ( $\text{C}_{\text{quat}}$ ), 115.4, 109.4 ( $\text{C}_{\text{quat}}$ ), 43.2, 32.4, 26.1, 22.5, 21.6, 13.8, 11.0, 10.2.

HRMS (MALDI-TOF) calcd for  $\text{C}_{20}\text{H}_{24}\text{N}_5\text{O}_2$   $[\text{M}+\text{H}]^+$  366.1925; found 366.1927.

### 4,4'-Butane-1,4-diylbis(3-butyl[1,2,3]triazolo[1,5-*a*]quinazolin-5(4*H*)-one) (2aa)

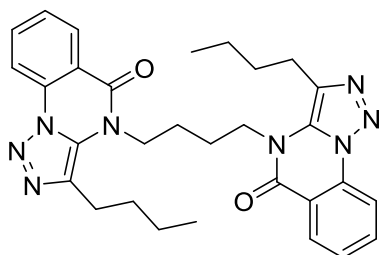

Prepared from iodotriazole **1aa** (79.4 mg, 0.1 mmol) according to **GP6** using CuI (3.8 mg, 20 mol%) and  $\text{Cs}_2\text{CO}_3$  (130.4 mg, 4 equiv) in DMSO (2 mL); eluent: hexanes– $\text{CH}_2\text{Cl}_2$ –EtOAc = 2:1:1. Yield 51.0 mg (95%). White solid; mp 191–192 °C.

$^1\text{H}$  NMR (400 MHz,  $\text{CDCl}_3$ – $\text{CD}_3\text{OD}$ )  $\delta$  8.29 (br d,  $J = 8.2$  Hz, 2H), 8.20 (br d,  $J = 7.9$  Hz, 2H), 7.78 (m, 2H), 7.49 (m, 2H), 4.20 (m, 4H), 2.79 (m, 4H), 1.84 (m, 4H), 1.69 (m, 4H), 1.35 (m, 4H), 0.87 (t,  $J = 7.3$  Hz, 6H).

$^{13}\text{C}\{^1\text{H}\}$  NMR (100 MHz,  $\text{CDCl}_3$ – $\text{CD}_3\text{OD}$ )  $\delta$  158.8 ( $2\text{C}_{\text{quat}}$ ), 135.1 (2C), 134.4 ( $2\text{C}_{\text{quat}}$ ), 131.6 ( $2\text{C}_{\text{quat}}$ ), 129.1 ( $2\text{C}_{\text{quat}}$ ), 129.0 (2C), 127.7 (2C), 115.7 ( $2\text{C}_{\text{quat}}$ ), 115.2 (2C), 42.8 (2C), 32.5 (2C), 25.8 (2C), 25.7 (2C), 22.3 (2C), 13.7 (2C).

HRMS (MALDI-TOF) calcd for  $\text{C}_{30}\text{H}_{35}\text{N}_8\text{O}_2$   $[\text{M}+\text{H}]^+$  539.2877; found 539.2878.

### 3-Butyl-4-[(3 $\alpha$ ,5 $\beta$ ,12 $\alpha$ )-3,12-dihydroxycholan-24-yl][1,2,3]triazolo[1,5-*a*]quinazolin-5(4*H*)-one (2ab)

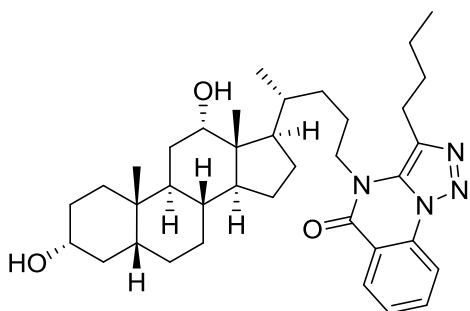

Prepared from iodotriazole **1ab** (109.6 mg, 0.15 mmol) according to **GP6**; eluent: hexanes–EtOAc = 1:2. Yield 79.6 mg (88%). Off-white solid; mp 103–106 °C.

$^1\text{H}$  NMR (400 MHz,  $\text{CDCl}_3$ )  $\delta$  8.41 (br d,  $J = 8.2$  Hz, 1H), 8.34 (dd,  $J = 8.0, 1.2$  Hz, 1H), 7.84 (m, 1H), 7.57 (m, 1H), 4.18 (ddd,  $J = 13.8, 10.7, 5.5$  Hz, 1H), 4.09 (ddd,  $J = 13.8, 10.7, 5.4$  Hz, 1H), 3.97 (m, 1H), 3.61 (tt,  $J = 11.0, 4.7$  Hz, 1H), 2.94–2.88 (m, 2H), 1.92–0.85 (m, 32H), 1.00 (d,  $J = 6.6$  Hz, 3H), 1.00 (t,  $J = 7.4$  Hz, 3H), 0.90 (s, 3H), 0.68 (s, 3H).

$^{13}\text{C}\{^1\text{H}\}$  NMR (100 MHz,  $\text{CDCl}_3$ )  $\delta$  158.5 ( $\text{C}_{\text{quat}}$ ), 134.8, 134.5 ( $\text{C}_{\text{quat}}$ ), 131.8 ( $\text{C}_{\text{quat}}$ ), 129.3 ( $\text{C}_{\text{quat}}$ ), 129.0, 127.5, 116.0 ( $\text{C}_{\text{quat}}$ ), 115.2, 72.9, 71.5, 48.1, 47.0, 46.3, 44.1, 42.0, 36.3, 35.9, 35.3, 35.1, 34.0, 33.5, 32.6, 32.3, 30.3, 28.6, 27.5, 27.0, 26.0, 25.8, 25.2, 23.6, 23.0, 22.5, 17.6, 13.8, 12.6.

HRMS (MALDI-TOF) calcd for  $\text{C}_{37}\text{H}_{55}\text{N}_4\text{O}_3$   $[\text{M}+\text{H}]^+$  603.4269; found 603.4268.

### Synthesis of 5*H*-[1,2,3]triazolo[1,5-*a*][3,1]benzoxazin-5-imines **3**

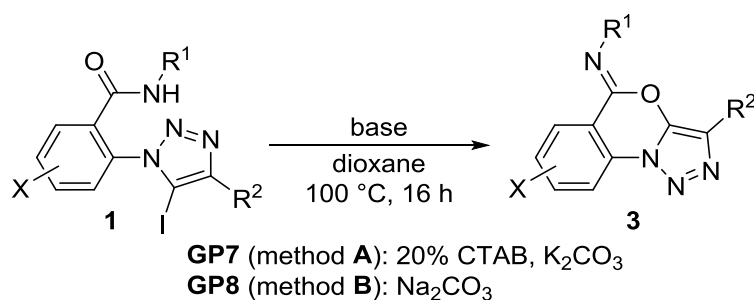

**General procedure 7 (GP7, method A in the main text).** In a vial with screw cap, 2-(5-iodotriazolyl)benzamide **1** (0.20 mmol, 1 equiv), cetyltrimethylammonium bromide (CTAB) (14.6 mg, 0.040 mmol, 20 mol %), and  $\text{K}_2\text{CO}_3$  (55.3 mg, 0.40 mmol, 2 equiv) were mixed under an Ar atmosphere in dioxane (2 mL). The reaction mixture was stirred at 100 °C in a dry block for 16 h, then diluted with  $\text{CH}_2\text{Cl}_2$  (20 mL), and washed with water (20 mL). The organic layer was dried with anhydrous  $\text{Na}_2\text{SO}_4$ , and the solvents were evaporated *in vacuo*. The residue was subjected to column chromatography on deactivated silica gel (*vide infra*) to afford pure triazole-fused cyclic imidate **3**.

#### Column chromatography on deactivated silica gel

Macherey–Nagel silica gel 60 (0.040–0.063 mm) was suspended in the mixture PhH–MeCN (20:1) containing 2% v/v  $\text{Et}_3\text{N}$  and stored for at least 24 h. Then, the column was filled with deactivated silica gel and washed with 3-fold volume of the corresponding eluent. A concentrated solution of the sample in the eluent (with small amounts of  $\text{CH}_2\text{Cl}_2$  to increase the solubility) was used for loading on the column.

**General procedure 8 (GP8, method B in the main text).** Synthesis was performed as described for **GP7** with  $\text{Na}_2\text{CO}_3$  (2 equiv) in dioxane without addition of CTAB.

### 3-Butyl-*N*-methyl-5*H*-[1,2,3]triazolo[1,5-*a*][3,1]benzoxazin-5-imine (**3a**)

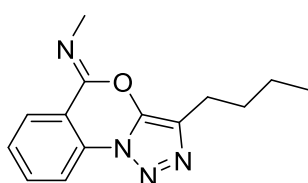

Prepared from iodotriazole **1a** (38.4 mg, 0.1 mmol) according to **GP7**; eluent: PhH–MeCN = 20:1. Yield 25.2 mg (98%). Yellowish oil.

$^1\text{H}$  NMR (400 MHz,  $\text{CDCl}_3$ )  $\delta$  8.12 (m, 1H), 8.10 (m, 1H), 7.65 (m, 1H), 7.40 (m, 1H), 3.31 (s, 3H), 2.76 (t,  $J = 7.5$  Hz, 2H), 1.74 (m, 2H),

1.42 (m, 2H), 0.96 (t,  $J = 7.4$  Hz, 3H).

$^{13}\text{C}\{^1\text{H}\}$  NMR (100 MHz,  $\text{CDCl}_3$ )  $\delta$  144.5 ( $\text{C}_{\text{quat}}$ ), 142.2 ( $\text{C}_{\text{quat}}$ ), 133.3, 132.2 ( $\text{C}_{\text{quat}}$ ), 128.5 ( $\text{C}_{\text{quat}}$ ), 128.1, 127.9, 114.7, 114.4 ( $\text{C}_{\text{quat}}$ ), 33.6, 30.3, 23.4, 22.2, 13.7.

IR (KBr,  $\text{cm}^{-1}$ )  $\nu$  3296, 3078, 2956, 2929, 2871, 2860, 1647, 1601, 1522, 1448, 1408, 1323, 1282, 1240, 1161, 758, 671.

HRMS (MALDI-TOF) calcd for  $\text{C}_{14}\text{H}_{19}\text{N}_4\text{O}_2$   $[\text{M}+\text{H}_2\text{O}+\text{H}]^+$  275.1503; found 275.1508.

### 3-Butyl-7-iodo-*N*-methyl-5*H*-[1,2,3]triazolo[1,5-*a*][3,1]benzoxazin-5-imine (3c)

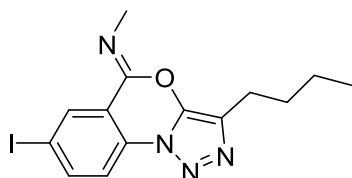

Prepared from iodotriazole **1c** (102.0 mg, 0.2 mmol) according to **GP7**; eluent: PhH–MeCN = 40:1. Yield 61.9 mg (81%). White solid; mp 125–127 °C.

$^1\text{H}$  NMR (400 MHz,  $\text{CDCl}_3$ )  $\delta$  8.48 (d,  $J = 1.8$  Hz, 1H), 7.96 (dd,  $J = 8.6, 1.8$  Hz, 1H), 7.85 (d,  $J = 8.6$  Hz, 1H), 3.33 (s, 3H), 2.76 (t,  $J = 7.5$  Hz, 2H), 1.75 (m, 2H), 1.43 (m, 2H), 0.97 (t,  $J = 7.4$  Hz, 3H).

$^{13}\text{C}\{^1\text{H}\}$  NMR (100 MHz,  $\text{CDCl}_3$ )  $\delta$  142.9 ( $\text{C}_{\text{quat}}$ ), 142.0 (2C, CH +  $\text{C}_{\text{quat}}$ ), 136.7, 131.6 ( $\text{C}_{\text{quat}}$ ), 128.7 ( $\text{C}_{\text{quat}}$ ), 116.4, 115.9 ( $\text{C}_{\text{quat}}$ ), 92.0 ( $\text{C}_{\text{quat}}$ ), 33.8, 30.2, 23.4, 22.2, 13.7.

HRMS (MALDI-TOF) calcd for  $\text{C}_{14}\text{H}_{16}\text{IN}_4\text{O}$   $[\text{M}+\text{H}]^+$  383.0363; found 383.0363.

### 3-Butyl-8-methoxy-*N*-methyl-5*H*-[1,2,3]triazolo[1,5-*a*][3,1]benzoxazin-5-imine (3d)

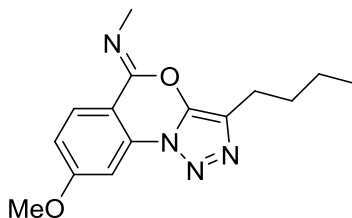

Prepared from iodotriazole **1d** (82.9 mg, 0.2 mmol) according to **GP7**; eluent: PhH–MeCN = 20:1. Yield 52.8 mg (92%). White solid; mp 90–91 °C.

$^1\text{H}$  NMR (400 MHz,  $\text{CDCl}_3$ )  $\delta$  7.99 (d,  $J = 8.9$  Hz, 1H), 7.54 (d,  $J = 2.5$  Hz, 1H), 6.92 (dd,  $J = 8.9, 2.5$  Hz, 1H), 3.94 (s, 3H), 3.28 (s, 3H), 2.76 (t,  $J = 7.6$  Hz, 2H), 1.76 (m, 2H), 1.44 (m, 2H), 0.98 (t,  $J = 7.4$  Hz, 3H).

$^{13}\text{C}\{^1\text{H}\}$  NMR (100 MHz,  $\text{CDCl}_3$ )  $\delta$  163.5 ( $\text{C}_{\text{quat}}$ ), 144.5 ( $\text{C}_{\text{quat}}$ ), 142.5 ( $\text{C}_{\text{quat}}$ ), 133.4 ( $\text{C}_{\text{quat}}$ ), 129.7, 128.5 ( $\text{C}_{\text{quat}}$ ), 115.9, 106.8 ( $\text{C}_{\text{quat}}$ ), 98.1, 55.9, 33.3, 30.2, 23.4, 22.1, 13.7.

HRMS (MALDI-TOF) calcd for  $\text{C}_{15}\text{H}_{19}\text{N}_4\text{O}_2$   $[\text{M}+\text{H}]^+$  287.1503; found 287.1504.

### 3-*tert*-Butyl-*N*-methyl-5*H*-[1,2,3]triazolo[1,5-*a*][3,1]benzoxazin-5-imine (3g)

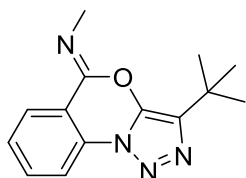

Prepared from iodotriazole **1g** (76.8 mg, 0.2 mmol) according to **GP7**; eluent: PhH–MeCN = 20:1. Yield 49.9 mg (97%). White solid; mp 120–122 °C.

$^1\text{H}$  NMR (400 MHz,  $\text{CDCl}_3$ )  $\delta$  8.14–8.10 (m, 2H), 7.66 (m, 1H), 7.41 (m, 1H), 3.32 (s, 3H), 1.47 (s, 9H).

$^{13}\text{C}\{^1\text{H}\}$  NMR (100 MHz,  $\text{CDCl}_3$ )  $\delta$  144.7 ( $\text{C}_{\text{quat}}$ ), 140.9 ( $\text{C}_{\text{quat}}$ ), 136.1 ( $\text{C}_{\text{quat}}$ ), 133.2, 132.2 ( $\text{C}_{\text{quat}}$ ), 127.9 (2C), 114.8, 114.2 ( $\text{C}_{\text{quat}}$ ), 33.9, 30.9 ( $\text{C}_{\text{quat}}$ ), 29.3 (3C).

HRMS (MALDI-TOF) calcd for C<sub>14</sub>H<sub>16</sub>KN<sub>4</sub>O [M+K]<sup>+</sup> 295.0956; found 295.0952.

### ***N*-Methyl-3-phenyl-5*H*-[1,2,3]triazolo[1,5-*a*][3,1]benzoxazin-5-imine (3h)**

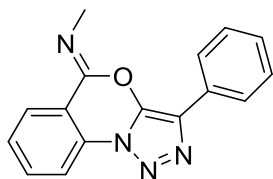

Prepared from iodotriazole **1h** (109.7 mg, 0.271 mmol) according to **GP8**; eluent: hexanes–EtOAc = 1:1. Yield 67 mg (89%). White solid; mp 191–192 °C.

<sup>1</sup>H NMR (400 MHz, CDCl<sub>3</sub>) δ 8.19–8.14 (m, 2H), 8.02–7.97 (m, 2H), 7.69 (m, 1H), 7.50–7.42 (m, 3H), 7.33 (m, 1H), 3.43 (s, 3H).

<sup>13</sup>C{<sup>1</sup>H} NMR (100 MHz, CDCl<sub>3</sub>) δ 144.0 (C<sub>quat</sub>), 141.5 (C<sub>quat</sub>), 133.5, 132.0 (C<sub>quat</sub>), 129.2 (C<sub>quat</sub>), 128.8 (2C), 128.3, 128.2, 127.8, 127.8, 125.1 (2C), 114.9, 114.2 (C<sub>quat</sub>), 34.1.

HRMS (MALDI-TOF) calcd for C<sub>16</sub>H<sub>12</sub>N<sub>4</sub>NaO [M+Na]<sup>+</sup> 299.0903; found 299.0898.

### **3-(4-*tert*-Butylphenyl)-*N*-methyl-5*H*-[1,2,3]triazolo[1,5-*a*][3,1]benzoxazin-5-imine (3l)**

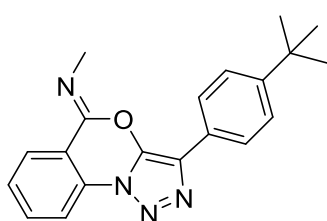

Prepared from iodotriazole **1l** (92.1 mg, 0.2 mmol) according to **GP8**; eluent: PhH–MeCN = 20:1. Yield 65.5 mg (99%). Pale yellow solid; mp 146–148 °C.

<sup>1</sup>H NMR (400 MHz, CDCl<sub>3</sub>) δ 8.11 (dd, *J* = 7.9, 1.3 Hz, 1H), 8.10 (m, 1H), 7.93–7.89 (m, 2H), 7.64 (m, 1H), 7.52–7.48 (m, 2H), 7.40 (m, 1H), 3.39 (s, 3H), 1.36 (s, 9H).

<sup>13</sup>C{<sup>1</sup>H} NMR (100 MHz, CDCl<sub>3</sub>) δ 150.8 (C<sub>quat</sub>), 144.0 (C<sub>quat</sub>), 141.3 (C<sub>quat</sub>), 133.3, 132.0 (C<sub>quat</sub>), 128.1, 128.0, 127.8 (C<sub>quat</sub>), 126.2 (C<sub>quat</sub>), 125.7 (2C), 124.8 (2C), 114.8, 114.1 (C<sub>quat</sub>), 34.6 (C<sub>quat</sub>), 34.0, 31.2 (3C).

HRMS (MALDI-TOF) calcd for C<sub>20</sub>H<sub>21</sub>N<sub>4</sub>O [M+H]<sup>+</sup> 333.1710; found 333.1710.

### **3-(4-Methoxyphenyl)-*N*-methyl-5*H*-[1,2,3]triazolo[1,5-*a*][3,1]benzoxazin-5-imine (3m)**

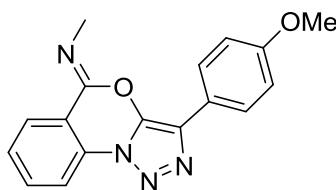

Prepared from iodotriazole **1m** (86.8 mg, 0.2 mmol) according to **GP8**; eluent: PhH–MeCN = 20:1. Yield 45.3 mg (74%). Beige solid; mp 188–190 °C.

<sup>1</sup>H NMR (400 MHz, CDCl<sub>3</sub>) δ 8.19–8.15 (m, 2H), 7.95–7.90 (m, 2H), 7.70 (m, 1H), 7.46 (m, 1H), 7.04–6.99 (m, 2H), 3.85 (s, 3H), 3.43 (s, 3H).

<sup>13</sup>C{<sup>1</sup>H} NMR (100 MHz, CDCl<sub>3</sub>) δ 159.1 (C<sub>quat</sub>), 144.1 (C<sub>quat</sub>), 140.7 (C<sub>quat</sub>), 133.3, 132.0 (C<sub>quat</sub>), 128.1, 128.0, 127.6 (C<sub>quat</sub>), 126.2 (2C), 121.7 (C<sub>quat</sub>), 114.8, 114.15 (2C), 114.11 (C<sub>quat</sub>), 55.2, 34.0.

HRMS (MALDI-TOF) calcd for C<sub>17</sub>H<sub>15</sub>N<sub>4</sub>O<sub>2</sub> [M+H]<sup>+</sup> 307.1190; found 307.1193.

### **Methyl 3-[5-(methylimino)-5*H*-[1,2,3]triazolo[1,5-*a*][3,1]benzoxazin-3-yl]benzoate (3n)**

Prepared from iodotriazole **1n** (69.3 mg, 0.15 mmol) according to **GP8** with heating for 38 h; eluent: PhH–MeCN = 20:1. Yield 46.5 mg (93%). White solid; mp 185–187 °C.

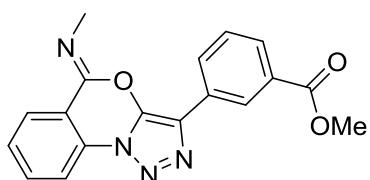

$^1\text{H}$  NMR (400 MHz,  $\text{CDCl}_3$ )  $\delta$  8.50 (br s, 1H), 8.09–7.99 (m, 3H), 7.84 (m, 1H), 7.60 (m, 1H), 7.41 (m, 1H), 7.36 (m, 1H), 3.85 (s, 3H), 3.35 (s, 3H).

$^{13}\text{C}\{^1\text{H}\}$  NMR (100 MHz,  $\text{CDCl}_3$ )  $\delta$  166.6 ( $\text{C}_{\text{quat}}$ ), 143.6 ( $\text{C}_{\text{quat}}$ ), 141.6 ( $\text{C}_{\text{quat}}$ ), 133.5, 131.7 ( $\text{C}_{\text{quat}}$ ), 130.5 ( $\text{C}_{\text{quat}}$ ), 129.3 ( $\text{C}_{\text{quat}}$ ), 128.9 (2C), 128.6, 128.4, 128.1, 126.7 ( $\text{C}_{\text{quat}}$ ), 125.9, 114.8, 114.0 ( $\text{C}_{\text{quat}}$ ), 52.2, 33.9.

HRMS (MALDI-TOF) calcd for  $\text{C}_{18}\text{H}_{15}\text{N}_4\text{O}_3$   $[\text{M}+\text{H}]^+$  335.1139; found 335.1140.

### 3-(4-Acetylphenyl)-*N*-methyl-5*H*-[1,2,3]triazolo[1,5-*a*][3,1]benzoxazin-5-imine (3o)

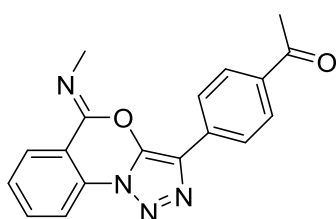

Prepared from iodotriazole **1o** (66.9 mg, 0.15 mmol) according to **GP8** with heating for 34 h; eluent: PhH–MeCN = 20:1. Yield 39.1 g (82%). White solid; mp 192–194 °C.

$^1\text{H}$  NMR (400 MHz,  $\text{CDCl}_3$ )  $\delta$  8.20–8.14 (m, 2H), 8.10–8.03 (m, 4H), 7.72 (m, 1H), 7.48 (m, 1H), 3.45 (s, 3H), 2.63 (s, 3H).

$^{13}\text{C}\{^1\text{H}\}$  NMR (100 MHz,  $\text{CDCl}_3$ )  $\delta$  197.1 ( $\text{C}_{\text{quat}}$ ), 143.3 ( $\text{C}_{\text{quat}}$ ), 142.1 ( $\text{C}_{\text{quat}}$ ), 135.7 ( $\text{C}_{\text{quat}}$ ), 133.5, 131.6 ( $\text{C}_{\text{quat}}$ ), 128.9 (2C), 128.4, 128.2 ( $\text{C}_{\text{quat}}$ ), 128.1, 126.7 ( $\text{C}_{\text{quat}}$ ), 124.6 (2C), 114.8, 114.0 ( $\text{C}_{\text{quat}}$ ), 34.1, 26.5.

HRMS (MALDI-TOF) calcd for  $\text{C}_{18}\text{H}_{15}\text{N}_4\text{O}_2$   $[\text{M}+\text{H}]^+$  319.1190; found 319.1188.

### 3-Butyl-*N*-(4-methylphenyl)-5*H*-[1,2,3]triazolo[1,5-*a*][3,1]benzoxazin-5-imine (3q)

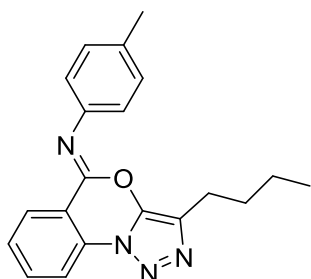

Prepared from iodotriazole **1q** (69.0 mg, 0.15 mmol) according to **GP8** with heating for 34 h; eluent: PhH–MeCN = 30:1. Yield 25.0 mg (50%). Beige solid; mp 91–93 °C.

$^1\text{H}$  NMR (400 MHz,  $\text{CDCl}_3$ )  $\delta$  8.36 (d,  $J$  = 8.0 Hz, 1H), 8.17 (d,  $J$  = 8.2 Hz, 1H), 7.72 (m, 1H), 7.49 (m, 1H), 7.24–7.17 (m, 4H), 2.69 (t,  $J$  = 7.6 Hz, 2H), 2.38 (s, 3H), 1.67 (m, 2H), 1.36 (m, 2H), 0.91 (t,  $J$  = 7.3 Hz, 3H).

$^{13}\text{C}\{^1\text{H}\}$  NMR (100 MHz,  $\text{CDCl}_3$ )  $\delta$  142.0 ( $\text{C}_{\text{quat}}$ ), 141.8 ( $\text{C}_{\text{quat}}$ ), 141.1 ( $\text{C}_{\text{quat}}$ ), 135.1 ( $\text{C}_{\text{quat}}$ ), 133.9, 132.9 ( $\text{C}_{\text{quat}}$ ), 129.4 (2C), 129.0, 128.8 ( $\text{C}_{\text{quat}}$ ), 128.1, 123.3 (2C), 114.8, 114.5 ( $\text{C}_{\text{quat}}$ ), 30.1, 23.5, 22.2, 21.0, 13.7.

HRMS (MALDI-TOF) calcd for  $\text{C}_{20}\text{H}_{21}\text{N}_4\text{O}$   $[\text{M}+\text{H}]^+$  333.1710; found 333.1713.

### 3-Butyl-*N*-(4-methoxyphenyl)-5*H*-[1,2,3]triazolo[1,5-*a*][3,1]benzoxazin-5-imine (3r)

Prepared from iodotriazole **1r** (71.4 mg, 0.15 mmol) according to **GP8** with heating for 48 h; eluent: PhH–MeCN = 20:1. Yield 37.7 mg (72%). Beige solid; mp 126–128 °C.

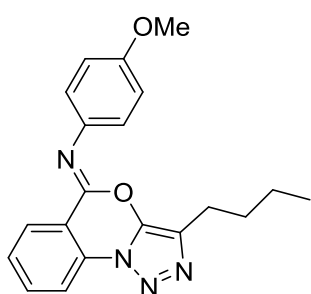

$^1\text{H}$  NMR (400 MHz,  $\text{CDCl}_3$ )  $\delta$  8.34 (dd,  $J = 7.9, 1.0$  Hz, 1H), 8.15 (d,  $J = 8.1$  Hz, 1H), 7.70 (m, 1H), 7.47 (m, 1H), 7.39–7.32 (m, 2H), 6.96–6.89 (m, 2H), 3.85 (s, 3H), 2.72 (t,  $J = 7.6$  Hz, 2H), 1.71 (m, 2H), 1.39 (m, 2H), 0.93 (t,  $J = 7.3$  Hz, 3H).

$^{13}\text{C}\{^1\text{H}\}$  NMR (100 MHz,  $\text{CDCl}_3$ )  $\delta$  157.4 ( $\text{C}_{\text{quat}}$ ), 141.8 ( $\text{C}_{\text{quat}}$ ), 141.2 ( $\text{C}_{\text{quat}}$ ), 136.5 ( $\text{C}_{\text{quat}}$ ), 133.6, 132.7 ( $\text{C}_{\text{quat}}$ ), 128.9, 128.7 ( $\text{C}_{\text{quat}}$ ), 128.1, 125.5 (2C), 114.7 (2C, CH +  $\text{C}_{\text{quat}}$ ), 113.9 (2C), 55.4, 30.2, 23.5, 22.2, 13.7.

HRMS (MALDI-TOF) calcd for  $\text{C}_{20}\text{H}_{21}\text{N}_4\text{O}_2$   $[\text{M}+\text{H}]^+$  349.1659; found 349.1664.

### 3-Butyl-*N*-cyclopropyl-5*H*-[1,2,3]triazolo[1,5-*a*][3,1]benzoxazin-5-imine (3s)

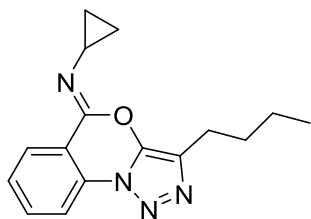

Prepared from iodotriazole **1s** (82.1 mg, 0.2 mmol) according to **GP7**; eluent: PhH–MeCN = 20:1. Yield 49.5 mg (88%). White solid; mp 94–96 °C.

$^1\text{H}$  NMR (400 MHz,  $\text{CDCl}_3$ )  $\delta$  8.08 (d,  $J = 8.1$  Hz, 1H), 8.04 (dd,  $J = 8.1, 1.1$  Hz, 1H), 7.61 (m, 1H), 7.36 (m, 1H), 3.55 (tt,  $J = 6.8, 3.5$  Hz, 1H), 2.77 (t,  $J = 7.5$  Hz, 2H), 1.76 (m, 2H), 1.44 (m, 2H), 1.01–0.92 (m, 4H), 0.97 (t,  $J = 7.3$  Hz, 3H), 0.92–0.86 (m, 4H).

$^{13}\text{C}\{^1\text{H}\}$  NMR (100 MHz,  $\text{CDCl}_3$ )  $\delta$  143.6 ( $\text{C}_{\text{quat}}$ ), 142.2 ( $\text{C}_{\text{quat}}$ ), 132.8, 131.8 ( $\text{C}_{\text{quat}}$ ), 128.4 ( $\text{C}_{\text{quat}}$ ), 127.8, 127.7, 114.6 (2C, CH +  $\text{C}_{\text{quat}}$ ), 30.3, 28.9, 23.4, 22.2, 13.7, 8.8 (2C).

HRMS (MALDI-TOF) calcd for  $\text{C}_{16}\text{H}_{19}\text{N}_4\text{O}$   $[\text{M}+\text{H}]^+$  283.1553; found 283.1555.

### 3-Butyl-*N*-cyclohexyl-5*H*-[1,2,3]triazolo[1,5-*a*][3,1]benzoxazin-5-imine (3t)

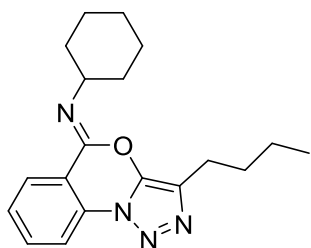

Prepared from iodotriazole **1t** (90.5 mg, 0.2 mmol) according to **GP7** with heating for 36 h; eluent: PhH–MeCN = 20:1. Yield 59.4 mg (92%). White solid; mp 72–74 °C.

$^1\text{H}$  NMR (400 MHz,  $\text{CDCl}_3$ )  $\delta$  8.19 (dd,  $J = 8.0, 1.1$  Hz, 1H), 8.09 (dd,  $J = 8.1, 1.0$  Hz, 1H), 7.64 (m, 1H), 7.40 (m, 1H), 3.97 (tt,  $J = 9.5, 3.5$  Hz, 1H), 2.77 (t,  $J = 7.5$  Hz, 2H), 1.88–1.79 (m, 4H), 1.76 (m, 2H), 1.68 (m, 1H), 1.55–1.27 (m, 7H), 0.98 (t,  $J = 7.3$  Hz, 3H).

$^{13}\text{C}\{^1\text{H}\}$  NMR (100 MHz,  $\text{CDCl}_3$ )  $\delta$  142.4 ( $\text{C}_{\text{quat}}$ ), 141.3 ( $\text{C}_{\text{quat}}$ ), 133.0, 132.3 ( $\text{C}_{\text{quat}}$ ), 128.5, 128.3 ( $\text{C}_{\text{quat}}$ ), 127.8, 114.7 ( $\text{C}_{\text{quat}}$ ), 114.6, 54.9, 33.4 (2C), 30.2, 25.7, 24.5 (2C), 23.5, 22.1, 13.7.

HRMS (MALDI-TOF) calcd for  $\text{C}_{19}\text{H}_{27}\text{N}_4\text{O}_2$   $[\text{M}+\text{H}_2\text{O}+\text{H}]^+$  343.2129; found 343.2128.

### 3-Butyl-*N*-[2-(5-methoxy-1*H*-indol-3-yl)ethyl]-5*H*-[1,2,3]triazolo[1,5-*a*][3,1]benzoxazin-5-imine (3x)

Prepared from iodotriazole **1x** (81.5 mg, 0.15 mmol) according to **GP7** with heating for 20 h; eluent: PhH–MeCN = 15:1. Yield 50.8 mg (82%). Pale yellow solid; mp 144–146 °C.

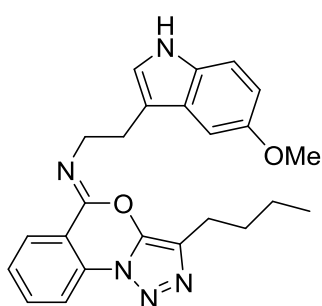

$^1\text{H}$  NMR (400 MHz,  $\text{CDCl}_3$ )  $\delta$  8.20 (dd,  $J = 8.1, 1.0$  Hz, 1H), 8.14 (br s, 1H), 8.06 (d,  $J = 8.1$  Hz, 1H), 7.62 (m, 1H), 7.39 (m, 1H), 7.20 (d,  $J = 8.8$  Hz, 1H), 7.12 (d,  $J = 2.3$  Hz, 1H), 7.05 (d,  $J = 2.0$  Hz, 1H), 6.83 (dd,  $J = 8.8, 2.3$  Hz, 1H), 3.94 (t,  $J = 7.3$  Hz, 2H), 3.84 (s, 3H), 3.14 (t,  $J = 7.3$  Hz, 2H), 2.63 (t,  $J = 7.6$  Hz, 2H), 1.67 (m, 2H), 1.37 (m, 2H), 0.92 (t,  $J = 7.4$  Hz, 3H).

$^{13}\text{C}\{^1\text{H}\}$  NMR (100 MHz,  $\text{CDCl}_3$ )  $\delta$  153.8 ( $\text{C}_{\text{quat}}$ ), 143.1 ( $\text{C}_{\text{quat}}$ ), 142.1 ( $\text{C}_{\text{quat}}$ ), 133.2, 132.2 ( $\text{C}_{\text{quat}}$ ), 131.3 ( $\text{C}_{\text{quat}}$ ), 128.4 ( $\text{C}_{\text{quat}}$ ), 128.3, 127.85 ( $\text{C}_{\text{quat}}$ ), 127.83, 122.7, 114.6, 114.4 ( $\text{C}_{\text{quat}}$ ), 114.0 ( $\text{C}_{\text{quat}}$ ), 111.9, 111.8, 100.7, 55.8, 47.4, 30.3, 26.4, 23.2, 22.1, 13.7.

HRMS (MALDI-TOF) calcd for  $\text{C}_{24}\text{H}_{26}\text{N}_5\text{O}_2$   $[\text{M}+\text{H}]^+$  416.2081; found 416.2077.

### 3-Butyl-N-[2-(3,5-dimethylisoxazol-4-yl)ethyl]-5H-[1,2,3]triazolo[1,5-a][3,1]benzoxazin-5-imine (3y)

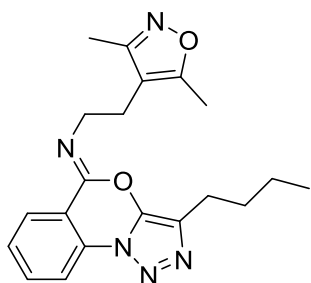

Prepared from iodotriazole **1y** (59.2 mg, 0.12 mmol) according to **GP7** with heating for 20 h; eluent: PhH–MeCN = 20:1. Yield 42.3 mg (96%). White solid; mp 105–107 °C.

$^1\text{H}$  NMR (400 MHz,  $\text{CDCl}_3$ )  $\delta$  8.12 (dd,  $J = 8.2, 1.0$  Hz, 1H), 8.11 (dd,  $J = 8.0, 1.3$  Hz, 1H), 7.68 (m, 1H), 7.43 (m, 1H), 3.72 (t,  $J = 7.0$  Hz, 2H), 2.73 (t,  $J = 7.6$  Hz, 2H), 2.72 (t,  $J = 7.0$  Hz, 2H), 2.38 (s, 3H),

2.30 (s, 3H), 1.73 (m, 2H), 1.42 (m, 2H), 0.96 (t,  $J = 7.3$  Hz, 3H).

$^{13}\text{C}\{^1\text{H}\}$  NMR (100 MHz,  $\text{CDCl}_3$ )  $\delta$  165.5 ( $\text{C}_{\text{quat}}$ ), 159.7 ( $\text{C}_{\text{quat}}$ ), 143.7 ( $\text{C}_{\text{quat}}$ ), 141.9 ( $\text{C}_{\text{quat}}$ ), 133.5, 132.3 ( $\text{C}_{\text{quat}}$ ), 128.4 ( $\text{C}_{\text{quat}}$ ), 128.1, 128.0, 114.8, 114.0 ( $\text{C}_{\text{quat}}$ ), 111.7 ( $\text{C}_{\text{quat}}$ ), 46.3, 30.3, 23.4, 23.3, 22.1, 13.7, 11.1, 10.3.

HRMS (MALDI-TOF) calcd for  $\text{C}_{20}\text{H}_{24}\text{N}_5\text{O}_2$   $[\text{M}+\text{H}]^+$  366.1925; found 366.1928.

### 3-Butyl-N-tert-butyl-5H-[1,2,3]triazolo[1,5-a][3,1]benzoxazin-5-imine (3z)

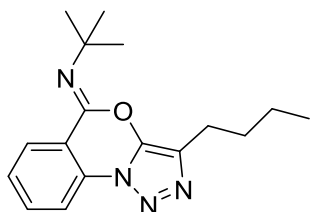

Prepared from iodotriazole **1z** (85.3 mg, 0.2 mmol) according to **GP7** with heating for 57 h; eluent: PhH–MeCN = 20:1. Yield 50.2 mg (84%). White solid; mp 50–51 °C.

$^1\text{H}$  NMR (400 MHz,  $\text{CDCl}_3$ )  $\delta$  8.16 (dd,  $J = 8.0, 1.4$  Hz, 1H), 8.09 (dd,  $J = 8.2, 1.1$  Hz, 1H), 7.63 (ddd,  $J = 8.2, 7.5, 1.4$  Hz, 1H), 7.39 (dd,  $J =$

8.0, 7.5, 1.1 Hz, 1H), 2.76 (t,  $J = 7.5$  Hz, 2H), 1.76 (m, 2H), 1.46 (s, 9H), 1.43 (m, 2H), 0.96 (t,  $J = 7.4$  Hz, 3H).

$^{13}\text{C}\{^1\text{H}\}$  NMR (100 MHz,  $\text{CDCl}_3$ )  $\delta$  142.3 ( $\text{C}_{\text{quat}}$ ), 139.4 ( $\text{C}_{\text{quat}}$ ), 132.9, 132.4 ( $\text{C}_{\text{quat}}$ ), 129.1, 128.4 ( $\text{C}_{\text{quat}}$ ), 127.7, 115.3 ( $\text{C}_{\text{quat}}$ ), 114.6, 54.9 ( $\text{C}_{\text{quat}}$ ), 30.7, 29.9 (3C), 23.5, 22.2, 13.7.

HRMS (MALDI-TOF) calcd for  $\text{C}_{17}\text{H}_{23}\text{N}_4\text{O}$   $[\text{M}+\text{H}]^+$  299.1866; found 299.1863.

**3-Butyl-N-[(3 $\alpha$ ,5 $\beta$ ,12 $\alpha$ )-3,12-dihydrocholan-24-yl]-5H-[1,2,3]triazolo[1,5-*a*][3,1]-benzoxazin-5-imine (3ab)**

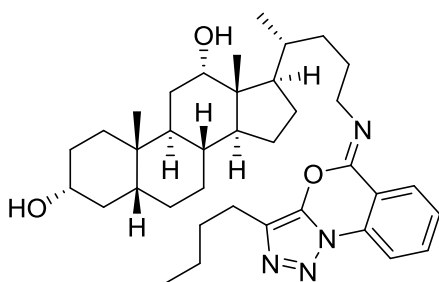

Prepared from iodotriazole **1ab** (109.6 mg, 0.15 mmol) according to **GP7**; eluent: PhH–EtOAc = 1:1. Yield 70.2 mg (78%). White solid; mp 85–87 °C.

<sup>1</sup>H NMR (400 MHz, CDCl<sub>3</sub>)  $\delta$  8.17 (dd, *J* = 8.0, 1.1 Hz, 1H), 8.11 (d, *J* = 8.1 Hz, 1H), 7.66 (m, 1H), 7.42 (m, 1H), 4.00 (m, 1H), 3.65–3.54 (m, 3H), 2.76 (t, *J* = 7.6 Hz, 2H),

2.17 (br s, 2H), 1.92–0.81 (m, 30H), 1.03 (d, *J* = 6.5 Hz, 3H), 0.97 (t, *J* = 7.4 Hz, 3H), 0.90 (s, 3H), 0.68 (s, 3H).

<sup>13</sup>C{<sup>1</sup>H} NMR (100 MHz, CDCl<sub>3</sub>)  $\delta$  142.8 (C<sub>quat</sub>), 142.2 (C<sub>quat</sub>), 133.2, 132.2 (C<sub>quat</sub>), 128.4 (C<sub>quat</sub>), 128.2, 127.9, 114.7, 114.5 (C<sub>quat</sub>), 73.1, 71.6, 48.2, 47.4, 47.0, 46.4, 42.0, 36.3, 35.9, 35.4, 35.2, 34.0, 33.6, 33.5, 30.4, 30.3, 28.5, 27.5, 27.1, 26.9, 26.1, 23.6, 23.4, 23.1, 22.1, 17.7, 13.7, 12.7.

HRMS (MALDI-TOF) calcd for C<sub>37</sub>H<sub>55</sub>N<sub>4</sub>O<sub>3</sub> [M+H]<sup>+</sup> 603.4269; found 603.4268.



## Details of X-ray diffraction measurements

Crystallographic data were collected at 100 K on a Bruker SMART APEX II diffractometer equipped with a PHOTON II CMOS detector using graphite monochromatized Mo–K $\alpha$  radiation ( $\lambda = 0.71073 \text{ \AA}$ ) using a  $\omega$ -scan mode. Absorption correction based on measurements of equivalent reflections was applied.<sup>7</sup> The structure was solved by direct methods and refined by full matrix least-squares on F2 with anisotropic thermal parameters for all non-hydrogen atoms using Olex2 package.<sup>8</sup> Hydrogen atoms were placed in calculated positions and refined using a riding model. Crystallographic details are presented in Table S1. CCDC 2242839 contains the supplementary crystallographic data for the structure. These data can be obtained free of charge from The Cambridge Crystallographic Data Centre *via* [www.ccdc.cam.ac.uk/data\\_request/cif](http://www.ccdc.cam.ac.uk/data_request/cif).

**Table S1.** Details of the X-ray crystal data collection and structure refinement for compound **3h**.

|                                                              |                                                  |
|--------------------------------------------------------------|--------------------------------------------------|
| Empirical formula                                            | C <sub>16</sub> H <sub>12</sub> N <sub>4</sub> O |
| M <sub>w</sub>                                               | 276.30                                           |
| Temperature (K)                                              | 100                                              |
| Size (mm)                                                    | 0.4 × 0.1 × 0.08                                 |
| Cryst. system                                                | monoclinic                                       |
| Space group                                                  | P 2 <sub>1</sub> /c                              |
| <i>a</i> (Å)                                                 | 7.6681(5)                                        |
| <i>b</i> (Å)                                                 | 12.2337(8)                                       |
| <i>c</i> (Å)                                                 | 13.8648(8)                                       |
| $\alpha$ (deg)                                               | 90                                               |
| $\beta$ (deg)                                                | 100.657(2)                                       |
| $\gamma$ (deg)                                               | 90                                               |
| V (Å <sup>3</sup> )                                          | 1278.21(14)                                      |
| Z                                                            | 4                                                |
| $\rho_{\text{cald}}$ (g·cm <sup>-3</sup> )                   | 1.436                                            |
| Abs coeff (mm <sup>-1</sup> )                                | 0.095                                            |
| <i>F</i> (000)                                               | 576.0                                            |
| $\theta$ range (deg)                                         | 2.24 < $\theta$ < 31.57                          |
| no. of collected/unique rflns                                | 22327 / 4252                                     |
| Completeness to $\theta$ (%)                                 | 99.5                                             |
| no. of data/restraints/params                                | 4252/0/238                                       |
| Goodness of fit on <i>F</i> <sup>2</sup>                     | 1.032                                            |
| Final <i>R</i> indices ( <i>I</i> > 2 $\sigma$ ( <i>I</i> )) | R1 = 0.0472, wR2 = 0.1076                        |
| <i>R</i> indices (all data)                                  | R1 = 0.0720, wR2 = 0.1194                        |
| Largest diff peak/hole (e/Å <sup>3</sup> )                   | 0.349 / -0.270                                   |

## Details of DFT calculations

The calculations were performed using ORCA 5.0.3 program package.<sup>9</sup> DFT calculations were performed at B3LYP<sup>10</sup>/ma-SVP<sup>11</sup> level of theory using PCM<sup>12</sup> solvation model with DMSO as solvent. RIJCOSX approximation was used to speed up the calculations. Thermodynamic properties were calculated for ideal gas at 298.15 K using QRRHO approach<sup>13</sup> for vibrational entropy correction. The nature of optimized intermediates and transition states was verified by frequency analysis. IRC calculations were performed to verify the connectivity of the PES. CYLView<sup>14</sup> was used to visualize structures.

**Scheme S1.** Non-catalytic pathways for cyclization of 2-(5-iodotriazolyl)benzamides.

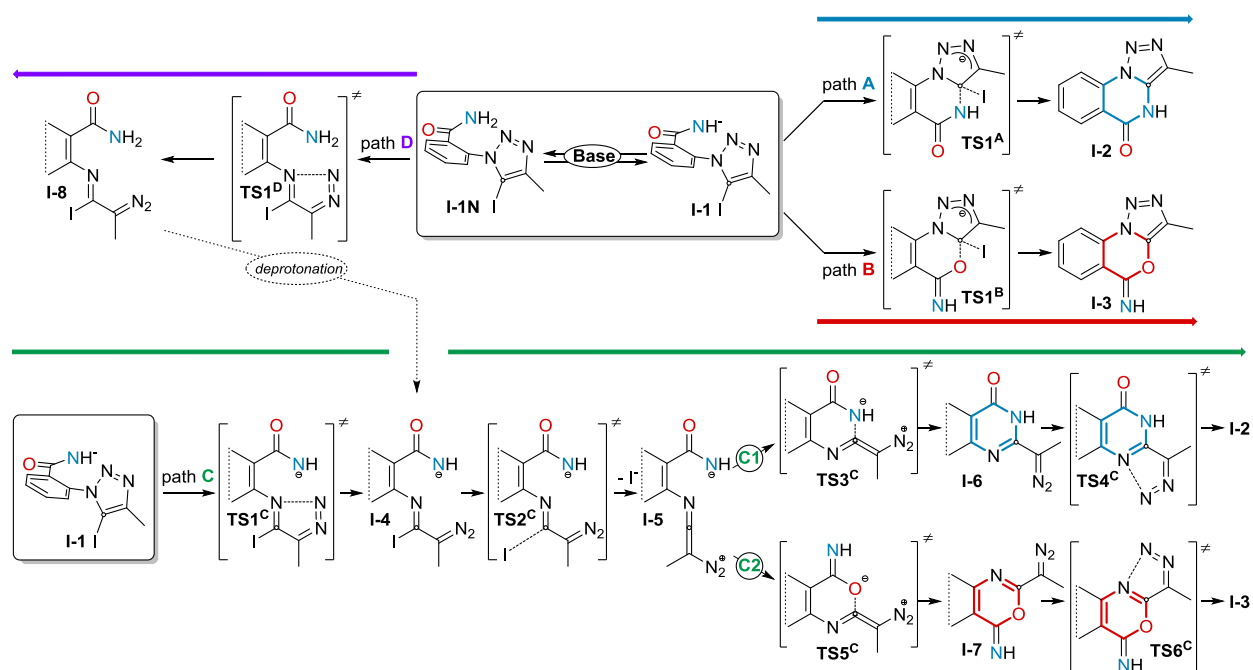

**Scheme S2.** Calculated free energies ( $\Delta G_{298}$ , kcal/mol) of intermediates for paths A-D.

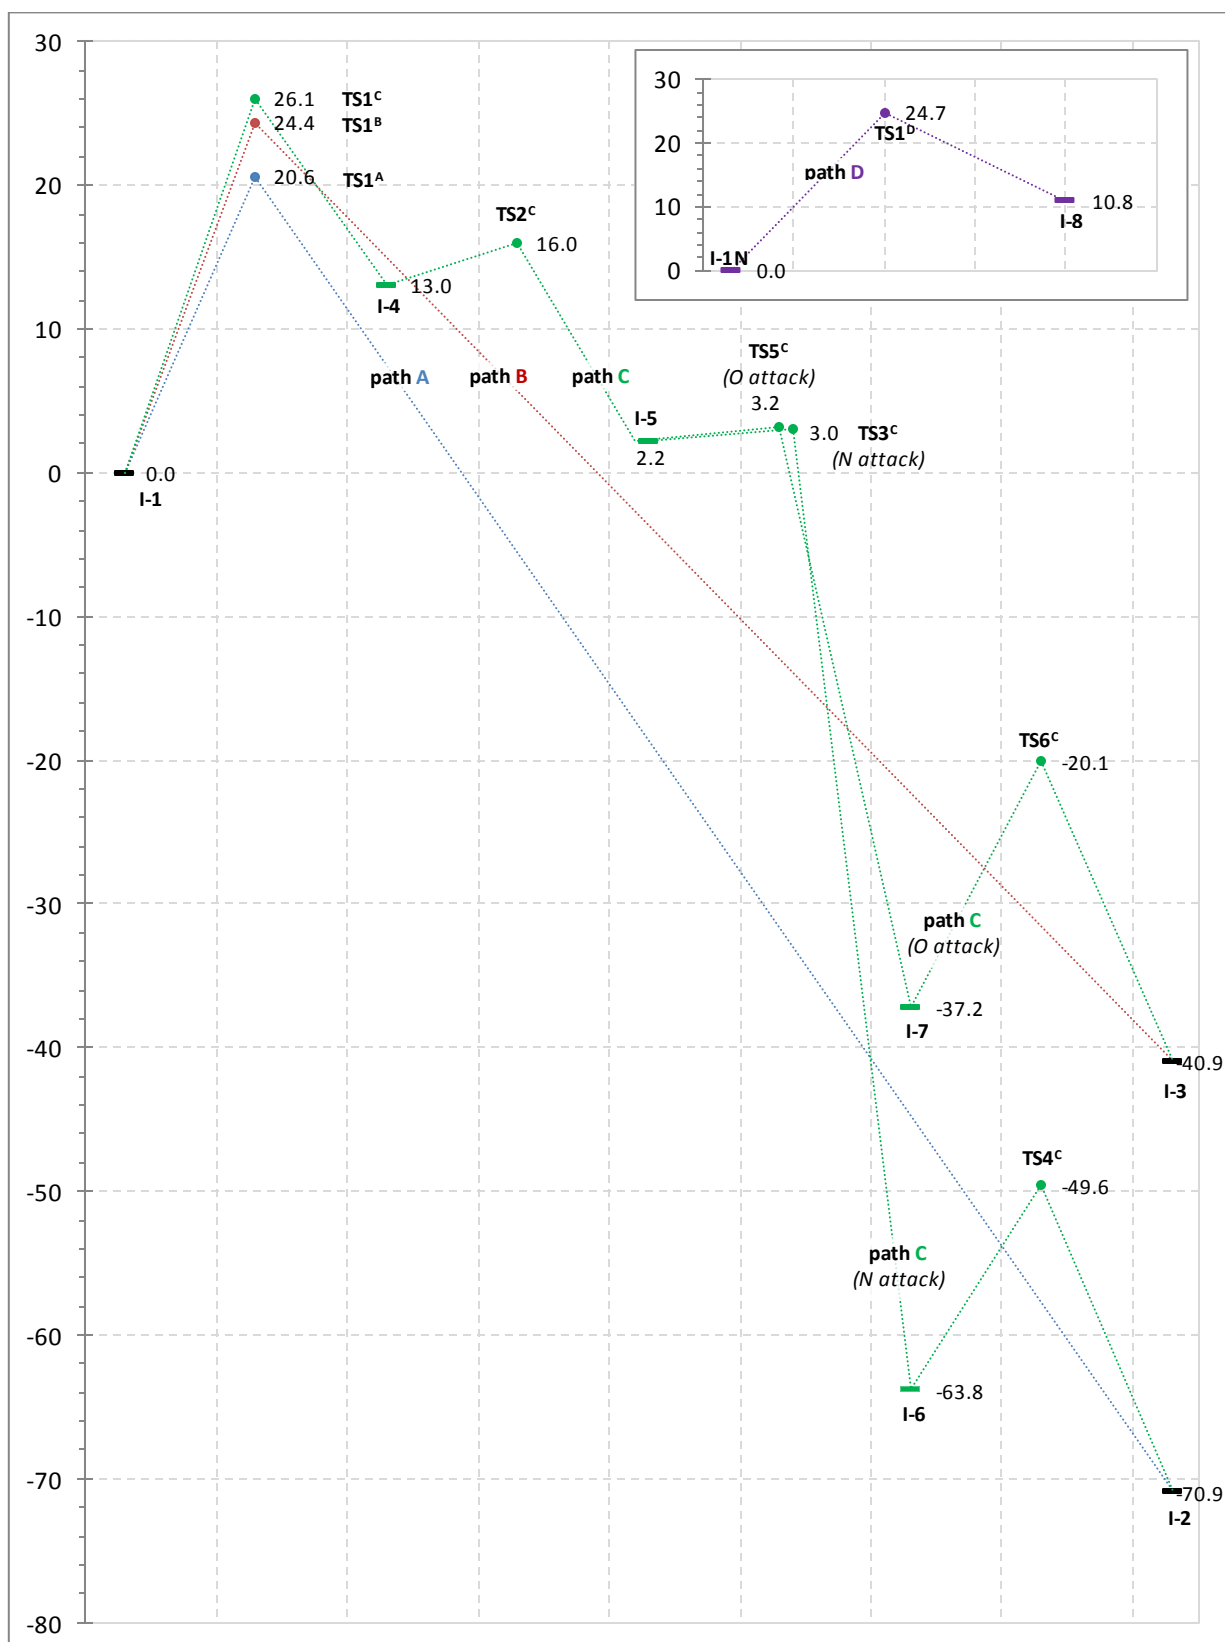

**Table S2.** Electronic and free energies (kcal/mol) of the reaction paths A-C.**Path A**

|    | <b>I-1<sub>2</sub></b> | → | <b>TS1<sup>A</sup></b> | → | <b>I-2</b> |
|----|------------------------|---|------------------------|---|------------|
| E  | 0.3                    |   | 21.1                   |   | -65.1      |
| ΔG | 0.2                    |   | 20.6                   |   | -70.9      |

|    | <b>I-1<sub>3</sub></b> | → | <b>TS1<sup>A</sup></b> | → | <b>I-2</b> |
|----|------------------------|---|------------------------|---|------------|
| E  | 0.8                    |   | 21.1                   |   | -65.1      |
| ΔG | 0.6                    |   | 20.6                   |   | -70.9      |

**Path B**

|    | <b>I-1<sub>1</sub></b> | → | <b>TS1<sup>B</sup></b> | → | <b>I-3</b> |
|----|------------------------|---|------------------------|---|------------|
| E  | 0.6                    |   | 24.1                   |   | -65.1      |
| ΔG | 0.6                    |   | 24.4                   |   | -70.9      |

|    | <b>I-1<sub>4</sub></b> | → | <b>TS1<sup>B</sup></b> | → | <b>I-3</b> |
|----|------------------------|---|------------------------|---|------------|
| E  | 0.0                    |   | 24.1                   |   | -65.1      |
| ΔG | 0.0                    |   | 24.4                   |   | -70.9      |

**Path C**

|    | <b>I-1<sub>1</sub></b> | → | <b>TS1<sup>C</sup><sub>1</sub></b> | → | <b>I-4<sub>1</sub></b> | → | <b>TS2<sup>C</sup><sub>1</sub></b> | → | <b>I-5<sub>1</sub></b> | → | <b>TS5<sup>C</sup><sub>1</sub></b> | → | <b>I-7</b> | → | <b>TS6<sup>C</sup></b> | → | <b>I-3</b> |
|----|------------------------|---|------------------------------------|---|------------------------|---|------------------------------------|---|------------------------|---|------------------------------------|---|------------|---|------------------------|---|------------|
| E  | 0.0                    |   | 28.6                               |   | 16.2                   |   | 20.0                               |   | 14.5                   |   | 14.6                               |   | -28.6      |   | -11.9                  |   | -34.4      |
| ΔG | 0.0                    |   | 26.1                               |   | 13.0                   |   | 16.2                               |   | 2.3                    |   | 3.3                                |   | -37.2      |   | -20.1                  |   | -40.9      |

|    | <b>I-1<sub>2</sub></b> | → | <b>TS1<sup>C</sup><sub>2</sub></b> | → | <b>I-4<sub>2</sub></b> | → | <b>TS2<sup>C</sup><sub>2</sub></b> | → | <b>I-5<sub>2</sub></b> | → | <b>TS5<sup>C</sup><sub>2</sub></b> | → | <b>I-7</b> | → | <b>TS6<sup>C</sup></b> | → | <b>I-3</b> |
|----|------------------------|---|------------------------------------|---|------------------------|---|------------------------------------|---|------------------------|---|------------------------------------|---|------------|---|------------------------|---|------------|
| E  | 0.8                    |   | 28.9                               |   | 16.5                   |   | 20.0                               |   | 14.4                   |   | 14.6                               |   | -28.6      |   | -11.9                  |   | -34.4      |
| ΔG | 0.6                    |   | 26.1                               |   | 13.0                   |   | 16.0                               |   | 2.2                    |   | 3.2                                |   | -37.2      |   | -20.1                  |   | -40.9      |

|    | <b>I-1<sub>3</sub></b> | → | <b>TS1<sup>C</sup><sub>2</sub></b> | → | <b>I-4<sub>2</sub></b> | → | <b>TS2<sup>C</sup><sub>3</sub></b> | → | <b>I-5<sub>3</sub></b> | → | <b>TS3<sup>C</sup><sub>1</sub></b> | → | <b>I-6</b> | → | <b>TS4<sup>C</sup></b> | → | <b>I-2</b> |
|----|------------------------|---|------------------------------------|---|------------------------|---|------------------------------------|---|------------------------|---|------------------------------------|---|------------|---|------------------------|---|------------|
| E  | 0.3                    |   | 28.9                               |   | 16.5                   |   | 20.0                               |   | 14.66                  |   | 14.71                              |   | -56.3      |   | -42.2                  |   | -65.1      |
| ΔG | 0.2                    |   | 26.1                               |   | 13.0                   |   | 16.0                               |   | 2.5                    |   | 3.2                                |   | -63.8      |   | -49.6                  |   | -70.9      |

|    | <b>I-1<sub>3</sub></b> | → | <b>TS1<sup>C</sup><sub>1</sub></b> | → | <b>I-4<sub>1</sub></b> | → | <b>TS2<sup>C</sup><sub>4</sub></b> | → | <b>I-5<sub>4</sub></b> | → | <b>TS3<sup>C</sup><sub>2</sub></b> | → | <b>I-6</b> | → | <b>TS4<sup>C</sup></b> | → | <b>I-2</b> |
|----|------------------------|---|------------------------------------|---|------------------------|---|------------------------------------|---|------------------------|---|------------------------------------|---|------------|---|------------------------|---|------------|
| E  | 0.6                    |   | 28.9                               |   | 16.2                   |   | 20.1                               |   | 14.64                  |   | 14.66                              |   | -56.3      |   | -42.2                  |   | -65.1      |
| ΔG | 0.6                    |   | 26.1                               |   | 13.0                   |   | 16.1                               |   | 2.2                    |   | 3.0                                |   | -63.8      |   | -49.6                  |   | -70.9      |

**Cartesian coordinates of all intermediates and transition states****I-1<sub>4</sub>**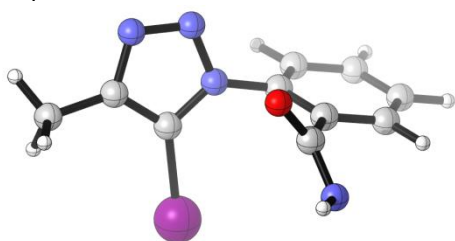 $E_{\text{PCM}} = -977.0603 E_h$  $\text{ZPE} = 0.1698 E_h$  $G_{298} = -976.9322 E_h$ 

|   |                   |                   |                   |
|---|-------------------|-------------------|-------------------|
| C | -2.55326350870345 | -1.20272165639229 | -1.51513024003103 |
| C | -1.18788512085671 | -0.89807367572894 | -1.36640117300843 |
| C | -0.85029805711785 | 0.05321178068966  | -0.38335088336516 |
| C | -1.82407350990887 | 0.67567125621000  | 0.40829337779348  |
| C | -3.17370211206590 | 0.36602867891498  | 0.22617069262517  |
| C | -3.53597498427766 | -0.57871786562415 | -0.74121556821757 |
| H | -2.83962014869778 | -1.93998254325748 | -2.26781166351322 |
| H | -1.51244540624006 | 1.39670936471343  | 1.16739849834761  |
| H | -3.93390167283076 | 0.85629699749736  | 0.83955522661248  |
| H | -4.58877609403753 | -0.83173019375891 | -0.89365663416151 |
| N | 0.51857059323073  | 0.42864596832858  | -0.14961012489988 |
| N | 0.97307748895402  | 1.62245859531477  | -0.56294827783831 |

|   |                   |                   |                   |
|---|-------------------|-------------------|-------------------|
| N | 2.22769116259884  | 1.71951904340025  | -0.21318443875016 |
| C | 2.62015042148525  | 0.59204450251084  | 0.44187216505990  |
| C | 1.51372310652394  | -0.24865004569872 | 0.49072315381870  |
| I | 1.30238107973630  | -2.10792336355264 | 1.40888940244450  |
| C | 4.00645791786028  | 0.39483129044388  | 0.96185135492705  |
| H | 3.99698637763281  | -0.04350726100139 | 1.97175603321741  |
| H | 4.53092502578159  | 1.36009823622284  | 1.00281620821806  |
| H | 4.58608029071743  | -0.28174862994249 | 0.31093281317764  |
| C | -0.15994211024721 | -1.54802960701165 | -2.29219227825471 |
| O | 0.69714035670828  | -0.77523217779796 | -2.82712931011516 |
| N | -0.30008267537609 | -2.84786843226723 | -2.45558401107250 |
| H | 0.42559357913042  | -3.16156726221275 | -3.11137132301434 |

### I-1<sub>3</sub>

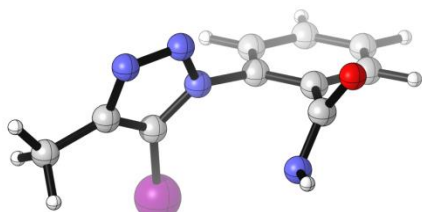

$$E_{\text{PCM}} = -977.0607 E_h$$

$$\text{ZPE} = 0.1697 E_h$$

$$G_{298} = -976.9328 E_h$$

|   |                   |                   |                   |
|---|-------------------|-------------------|-------------------|
| C | -2.61999768464748 | -1.30953293695908 | -1.43717008488811 |
| C | -1.24039384234151 | -1.05333788704687 | -1.33684034309480 |
| C | -0.82740153342558 | -0.11954319391355 | -0.37042926569003 |
| C | -1.74499375564529 | 0.53384951325626  | 0.46426562191992  |
| C | -3.10635558203364 | 0.24380925155812  | 0.36048786065834  |
| C | -3.54238938810031 | -0.68480668003155 | -0.59426216538144 |
| H | -2.96659441775291 | -2.02259282602407 | -2.18966535853895 |
| H | -1.38539413050016 | 1.27056978785029  | 1.18637566533008  |
| H | -3.82262191949984 | 0.74705363274693  | 1.01479622084838  |
| H | -4.60683310864453 | -0.91758388066450 | -0.68571774702096 |
| N | 0.56260423358619  | 0.22416433337081  | -0.24382752578560 |
| N | 1.17588348022091  | 0.94230764130343  | -1.19957936306508 |
| N | 2.41910637832847  | 1.11542958097396  | -0.83787495809463 |
| C | 2.64534795467229  | 0.51732013402971  | 0.36429099702750  |
| C | 1.44361518681104  | -0.06113017436137 | 0.75670294643986  |
| I | 1.01244647735294  | -1.18945559708070 | 2.45512034737301  |
| C | 3.97745615668842  | 0.52361331611797  | 1.04003920450308  |
| H | 3.89392601680416  | 0.84598931165709  | 2.09003777691707  |
| H | 4.65674819485261  | 1.21083094561441  | 0.51609464045717  |
| H | 4.43370937796465  | -0.48062749640867 | 1.03610969111264  |
| C | -0.28321197242485 | -1.76903473211322 | -2.28592394027556 |
| O | -0.47631009854139 | -1.55601072211874 | -3.52602189561114 |
| N | 0.61099644906249  | -2.54622409859982 | -1.71522774078544 |
| H | 1.17381652721332  | -2.98031022315683 | -2.45779358435532 |

### I-1<sub>2</sub>

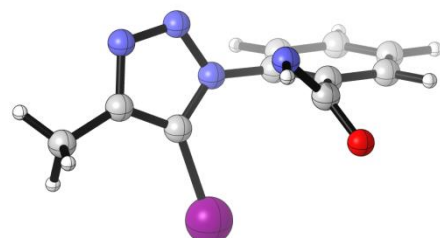

$$E_{\text{PCM}} = -977.0601 E_h$$

$$\text{ZPE} = 0.1698 E_h$$

$$G_{298} = -976.9321 E_h$$

|   |                   |                   |                   |
|---|-------------------|-------------------|-------------------|
| C | -2.53473756703842 | -1.18432280783108 | -1.52713440379349 |
| C | -1.17114502382178 | -0.86719432837355 | -1.38126443143951 |
| C | -0.83652756152401 | 0.06924465725690  | -0.38465934337591 |
| C | -1.81521059049624 | 0.67488820383831  | 0.41653752548579  |
| C | -3.16243537843526 | 0.36141622277932  | 0.23052561527057  |
| C | -3.52053415201802 | -0.57502582890115 | -0.74774977077445 |
| H | -2.81676984503934 | -1.92167545959793 | -2.28219039850163 |

|   |                   |                   |                   |
|---|-------------------|-------------------|-------------------|
| H | -1.50744861283931 | 1.38578778882399  | 1.18673045940719  |
| H | -3.92481766476434 | 0.83814884655382  | 0.85177259741829  |
| H | -4.57175956570434 | -0.83360323991508 | -0.90139488213766 |
| N | 0.52943947526017  | 0.44751949351535  | -0.13993939157247 |
| N | 0.97891968662688  | 1.65301602318150  | -0.52457221744811 |
| N | 2.23033181965102  | 1.75085712248582  | -0.16342860076451 |
| C | 2.62607820683072  | 0.61157728378030  | 0.46879149556601  |
| C | 1.52482465650576  | -0.23677482614336 | 0.49216492569233  |
| I | 1.32183075063993  | -2.12055055501349 | 1.36064898014616  |
| C | 4.00968015628430  | 0.41217790312530  | 0.99513983335600  |
| H | 3.99474221688528  | -0.03153699934596 | 2.00273112995234  |
| H | 4.53303452052142  | 1.37760934898341  | 1.04463183042995  |
| H | 4.59338494449892  | -0.26071742082335 | 0.34417006127077  |
| C | -0.16964245186276 | -1.56729944369454 | -2.29915592589744 |
| O | -0.28821394288640 | -2.83261814363778 | -2.38021114091128 |
| N | 0.67578465198626  | -0.78563460658862 | -2.93588695795536 |
| H | 1.26121624173954  | -1.38089231445811 | -3.53501168642357 |

### I-1<sub>1</sub>

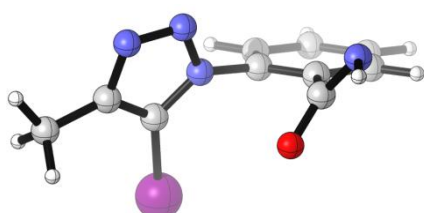

$$E_{\text{PCM}} = -977.0613 E_h$$

$$\text{ZPE} = 0.1698 E_h$$

$$G_{298} = -976.9331 E_h$$

|   |                   |                   |                   |
|---|-------------------|-------------------|-------------------|
| C | -2.62183386610771 | -1.27559239715698 | -1.46458297887223 |
| C | -1.24430344271578 | -1.01268328857753 | -1.36612091757975 |
| C | -0.83253784101145 | -0.10253541204804 | -0.37446258627879 |
| C | -1.74862481861860 | 0.52663402558249  | 0.47741329607921  |
| C | -3.11037749382205 | 0.23367417715487  | 0.37050684281976  |
| C | -3.54466735786683 | -0.67380008795598 | -0.60321740519007 |
| H | -2.96622081913355 | -1.97529620218753 | -2.22955231142644 |
| H | -1.38931853892961 | 1.24796545889939  | 1.21500853628150  |
| H | -3.82647078700813 | 0.71793260786616  | 1.03921052935472  |
| H | -4.60832675386010 | -0.90959829126321 | -0.69657565502143 |
| N | 0.55705589985804  | 0.24228614165023  | -0.24465898475688 |
| N | 1.16543431912194  | 0.98278069392404  | -1.18594861299648 |
| N | 2.40976223897893  | 1.15001846181875  | -0.82489493798401 |
| C | 2.64168903861759  | 0.52387050943878  | 0.36178813221314  |
| C | 1.44222568966596  | -0.06461459837751 | 0.74571036545203  |
| I | 1.01871908008231  | -1.23468851882556 | 2.41757527202968  |
| C | 3.97638583784177  | 0.51606911289647  | 1.03244585071486  |
| H | 3.89766524914335  | 0.82424640059116  | 2.08713238065355  |
| H | 4.65592727240811  | 1.20846845269579  | 0.51569533759012  |
| H | 4.42944171083863  | -0.48940223959252 | 1.01310920227372  |
| C | -0.25434096430492 | -1.74296332395293 | -2.26964306013749 |
| O | 0.67637301910389  | -2.38323238445251 | -1.68404067972110 |
| N | -0.49565497452577 | -1.64518833233022 | -3.56019677498037 |
| H | 0.21887474924399  | -2.19132410879762 | -4.05723989051724 |

### TS1<sup>A</sup>

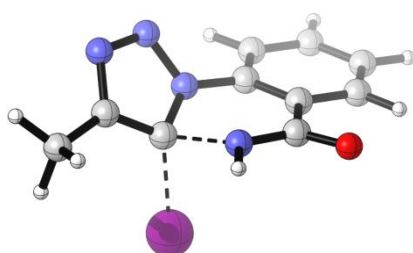

$$E_{\text{PCM}} = -977.0277 E_h$$

$$\text{ZPE} = 0.1685 E_h$$

$$G_{298} = -976.9003 E_h$$

|   |                   |                   |                   |
|---|-------------------|-------------------|-------------------|
| C | -2.62183386610771 | -1.27559239715698 | -1.46458297887223 |
| C | -1.24430344271578 | -1.01268328857753 | -1.36612091757975 |
| C | -0.83253784101145 | -0.10253541204804 | -0.37446258627879 |

|   |                   |                   |                   |
|---|-------------------|-------------------|-------------------|
| C | -1.74862481861860 | 0.52663402558249  | 0.47741329607921  |
| C | -3.11037749382205 | 0.23367417715487  | 0.37050684281976  |
| C | -3.54466735786683 | -0.67380008795598 | -0.60321740519007 |
| H | -2.96622081913355 | -1.97529620218753 | -2.22955231142644 |
| H | -1.38931853892961 | 1.24796545889939  | 1.21500853628150  |
| H | -3.82647078700813 | 0.71793260786616  | 1.03921052935472  |
| H | -4.60832675386010 | -0.90959829126321 | -0.69657565502143 |
| N | 0.55705589985804  | 0.24228614165023  | -0.24465898475688 |
| N | 1.16543431912194  | 0.98278069392404  | -1.18594861299648 |
| N | 2.40976223897893  | 1.15001846181875  | -0.82489493798401 |
| C | 2.64168903861759  | 0.52387050943878  | 0.36178813221314  |
| C | 1.44222568966596  | -0.06461459837751 | 0.74571036545203  |
| I | 1.01871908008231  | -1.23468851882556 | 2.41757527202968  |
| C | 3.97638583784177  | 0.51606911289647  | 1.03244585071486  |
| H | 3.89766524914335  | 0.82424640059116  | 2.08713238065355  |
| H | 4.65592727240811  | 1.20846845269579  | 0.51569533759012  |
| H | 4.42944171083863  | -0.48940223959252 | 1.01310920227372  |
| C | -0.25434096430492 | -1.74296332395293 | -2.26964306013749 |
| O | 0.67637301910389  | -2.38323238445251 | -1.68404067972110 |
| N | -0.49565497452577 | -1.64518833233022 | -3.56019677498037 |
| H | 0.21887474924399  | -2.19132410879762 | -4.05723989051724 |

### TS1<sup>B</sup>

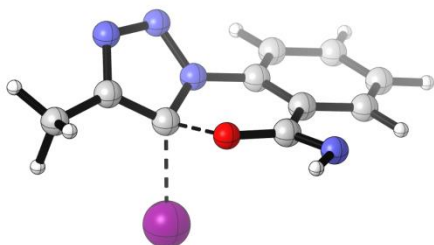

$$E_{\text{PCM}} = -977.0228 E_h$$

$$\text{ZPE} = 0.1690 E_h$$

$$G_{298} = -976.8943 E_h$$

|   |                   |                   |                   |
|---|-------------------|-------------------|-------------------|
| C | -2.48311137162639 | -1.26880924888389 | -1.41568615015243 |
| C | -1.15765367804832 | -0.92138736177006 | -1.09559491737798 |
| C | -0.96185610012376 | 0.14907414492022  | -0.19656677830799 |
| C | -2.04406103105152 | 0.86425071147989  | 0.33628457234416  |
| C | -3.34662055051068 | 0.50805417746055  | -0.01296090460153 |
| C | -3.56677370689365 | -0.56878795309536 | -0.88419893233795 |
| H | -2.64859237223582 | -2.09732336590629 | -2.10526195456692 |
| H | -1.85232782634733 | 1.68617314532767  | 1.02817429857024  |
| H | -4.19121491991983 | 1.06179175097376  | 0.40552714552984  |
| H | -4.58606419603802 | -0.86044202906638 | -1.14993682942559 |
| N | 0.35716849317920  | 0.50568839477175  | 0.15349037933017  |
| N | 0.80571854587395  | 1.81825064364467  | 0.14899457495711  |
| N | 2.10192145883827  | 1.75108184134965  | 0.24234458693776  |
| C | 2.53696003824910  | 0.46560659841528  | 0.29524000711811  |
| C | 1.39841335446313  | -0.36315722002010 | 0.21917677038823  |
| I | 1.27056157951875  | -2.20241697060647 | 1.57176474109312  |
| C | 3.97772715186372  | 0.09162832552427  | 0.42342020519796  |
| H | 4.15260610273080  | -0.56033907306783 | 1.29681883451696  |
| H | 4.58730108023472  | 0.99909299905290  | 0.54701656260352  |
| H | 4.34976942475421  | -0.44874350692274 | -0.46464611524792 |
| C | -0.00256652775698 | -1.64018577583339 | -1.75422896412128 |
| O | 1.21867484778918  | -1.37123705828041 | -1.35742725955936 |
| N | -0.26610506173431 | -2.47597070915189 | -2.71376719087866 |
| H | 0.61311726479159  | -2.88776046031581 | -3.04392168200953 |

## I-2

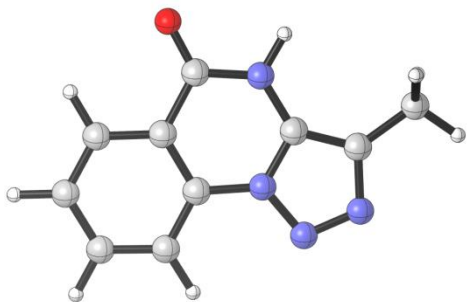

$$E_{\text{PCM}} = -679.2743 E_h$$

$$\text{ZPE} = 0.1731 E_h$$

$$G_{298} = -679.1386 E_h$$

|   |                   |                   |                   |
|---|-------------------|-------------------|-------------------|
| C | -3.32939986300302 | 1.36662620117838  | -0.75359091384555 |
| C | -2.13924012013509 | 1.32127434985787  | -0.02859031896748 |
| C | -1.10283615382549 | 0.49657812627888  | -0.48364301805887 |
| C | -1.24505229836171 | -0.28180230181069 | -1.65464747237059 |
| C | -2.45581527172457 | -0.21587059776493 | -2.36586235385348 |
| C | -3.49186946062511 | 0.60093906201534  | -1.92110546791527 |
| H | -4.14343410419893 | 2.00689435317940  | -0.40442826776165 |
| H | -2.00670327256199 | 1.91163456077907  | 0.87826796681997  |
| H | -2.56319121764700 | -0.81852562598330 | -3.26969795683442 |
| H | -4.43031635497961 | 0.64617171859913  | -2.47835564277971 |
| N | 0.12032201629113  | 0.39727304421619  | 0.19512714868292  |
| N | 0.46505278196813  | 1.05113896066522  | 1.33168553891938  |
| N | 1.67694255771948  | 0.67193833406250  | 1.62698286492056  |
| C | 2.15585037252843  | -0.22237641744427 | 0.71663968155074  |
| C | 1.14093200872020  | -0.40166069500737 | -0.21934087058729 |
| C | -0.14722070070613 | -1.16072939722126 | -2.13690260265489 |
| O | -0.21882896452038 | -1.85388399077570 | -3.14865559773678 |
| N | 0.99509232995382  | -1.15485631588270 | -1.35897654835388 |
| C | 3.51558352435889  | -0.83742206957890 | 0.79502678539734  |
| H | 4.10829386350475  | -0.62763050442093 | -0.11074557059176 |
| H | 3.45965943159196  | -1.93288651421532 | 0.90956703811347  |
| H | 4.05435233214198  | -0.42842428257515 | 1.66139921289310  |
| H | 1.76612656351025  | -1.74849999815148 | -1.66105363498583 |

## I-3

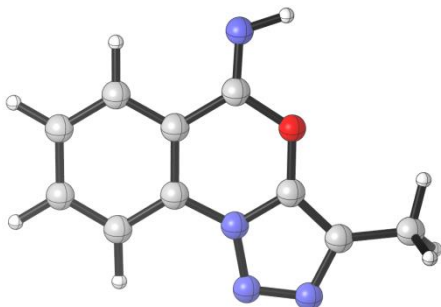

$$E_{\text{PCM}} = -679.2254 E_h$$

$$\text{ZPE} = 0.1719 E_h$$

$$G_{298} = -679.0909 E_h$$

|   |                   |                   |                   |
|---|-------------------|-------------------|-------------------|
| C | -3.13054186130895 | 1.44191772663685  | -0.06188282586618 |
| C | -1.94800863757573 | 1.38461958730991  | 0.67639611597198  |
| C | -0.90554160638291 | 0.57641537130115  | 0.21342820364020  |
| C | -1.02170952080165 | -0.17741084710009 | -0.97312124983461 |
| C | -2.22406556551167 | -0.10091452373473 | -1.69738941566653 |
| C | -3.27032908054861 | 0.70172196511144  | -1.24677974439087 |
| H | -3.95241058619046 | 2.07006978511812  | 0.29054176221196  |
| H | -1.82673342529868 | 1.95393308174649  | 1.59826170813120  |
| H | -2.32096915904667 | -0.68163026944516 | -2.61590502511011 |
| H | -4.20030906964924 | 0.75311750497463  | -1.81746685340478 |
| N | 0.31607878122954  | 0.46364681897175  | 0.89768521168350  |
| N | 0.66684941086956  | 1.08517323512523  | 2.04562793316395  |
| N | 1.88068707783663  | 0.70079324076974  | 2.32615630159996  |
| C | 2.35525200578021  | -0.17069689423713 | 1.38628337834882  |
| C | 1.33503708382878  | -0.31941599382673 | 0.46286226787408  |
| C | 0.09149301151975  | -1.03120054532874 | -1.44628125826893 |
| N | 0.05250526998465  | -1.73192070106034 | -2.50199135848667 |



|   |                  |                   |                   |
|---|------------------|-------------------|-------------------|
| O | 1.24466456036268 | -1.04789042838424 | -0.66141491719756 |
| C | 3.71588085368698 | -0.78362480160174 | 1.43224451144496  |
| H | 3.87008691089917 | -1.44873815570111 | 0.57076105793691  |
| H | 3.85169594529549 | -1.37523583893213 | 2.35204627743739  |
| H | 4.49869816007255 | -0.00823763267137 | 1.41234274555665  |
| H | 0.92465944094860 | -2.24863968504181 | -2.64897282677536 |

I<sup>+</sup>

$$E_{\text{PCM}} = -297.8907 E_h$$

$$G_{298} = -297.9075 E_h$$

TS1<sup>c</sup><sub>2</sub>

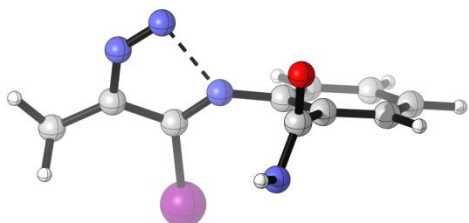

$$E_{\text{PCM}} = -977.0152 E_h$$

$$\text{ZPE} = 0.1661 E_h$$

$$G_{298} = -976.8916 E_h$$

|   |                   |                   |                   |
|---|-------------------|-------------------|-------------------|
| C | -2.66232402984632 | -1.01531984715356 | -1.66406912024625 |
| C | -1.27703983603282 | -0.82646896889237 | -1.53608238389805 |
| C | -0.79612821002736 | -0.13026565906062 | -0.40321163570579 |
| C | -1.69995372372933 | 0.37147165486221  | 0.55609946861745  |
| C | -3.07329662610043 | 0.16939147837243  | 0.40778652738196  |
| C | -3.55840959390086 | -0.52950756727586 | -0.70563313882265 |
| H | -3.04217542731312 | -1.55775650099567 | -2.53490941075821 |
| H | -1.31093695505354 | 0.92781595622825  | 1.41230315212437  |
| H | -3.76356866466192 | 0.56129297399340  | 1.15978728641263  |
| H | -4.63252755413501 | -0.69274940199109 | -0.82874212852864 |
| N | 0.57305860462023  | 0.12314214661677  | -0.26754440781570 |
| N | 1.94012903939891  | 1.46653037927608  | -1.26187994872262 |
| N | 2.77979963553845  | 1.14583610775216  | -0.50645584564763 |
| C | 2.77583637704568  | 0.30098621019540  | 0.53163199775101  |
| C | 1.44023659953192  | -0.24223763519227 | 0.59930160137658  |
| I | 1.04432330185485  | -1.67082400016209 | 2.15519852124471  |
| C | 3.98063054458093  | 0.02839135392009  | 1.37649157908675  |
| H | 3.80375314911090  | 0.27168114686236  | 2.43698166377101  |
| H | 4.81579074378202  | 0.64925237513460  | 1.02242925139398  |
| H | 4.29575294242446  | -1.02681427470999 | 1.32099898900080  |
| C | -0.34010960378408 | -1.33853312680003 | -2.62310393308547 |
| O | -0.23516796962563 | -0.59977493620164 | -3.65617870410100 |
| N | 0.23972305923509  | -2.49524588980758 | -2.38391210506516 |
| H | 0.82883819708695  | -2.72963597497096 | -3.19361627576410 |

TS1<sup>c</sup><sub>1</sub>

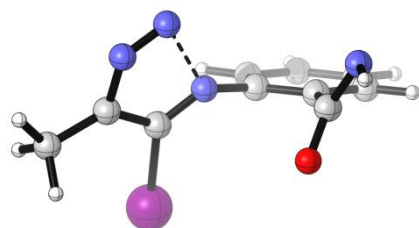

$$E_{\text{PCM}} = -977.0157 E_h$$

$$\text{ZPE} = 0.1663 E_h$$

$$G_{298} = -976.8916 E_h$$

|   |                   |                   |                   |
|---|-------------------|-------------------|-------------------|
| C | -2.65040894533190 | -0.94844416704027 | -1.70183853821547 |
| C | -1.26461676714997 | -0.77175535044907 | -1.56300670809330 |
| C | -0.78630120839906 | -0.12457661689596 | -0.39836608999168 |
| C | -1.69258333699013 | 0.34220114922037  | 0.57525421561584  |
| C | -3.06633565957331 | 0.14704590308620  | 0.41693758707007  |
| C | -3.54904281883499 | -0.50458645862517 | -0.72470922469799 |
| H | -3.02774767395831 | -1.44829834035594 | -2.59799502706796 |
| H | -1.30564865999662 | 0.87097317640551  | 1.44960485063552  |
| H | -3.75757099740328 | 0.51075419023167  | 1.18215430130417  |

|   |                   |                   |                   |
|---|-------------------|-------------------|-------------------|
| H | -4.62308895760880 | -0.65992520226898 | -0.85854467967146 |
| N | 0.57974969951697  | 0.13403128142031  | -0.24961716299608 |
| N | 1.93857112955190  | 1.50183899117329  | -1.21888397205934 |
| N | 2.77988088931795  | 1.17394209676082  | -0.46778190692395 |
| C | 2.78034505387088  | 0.31006160039226  | 0.55407738761750  |
| C | 1.44748171486424  | -0.24237714450613 | 0.61088418825544  |
| I | 1.06046799171001  | -1.70476177011752 | 2.13740388565149  |
| C | 3.98477929123323  | 0.03157844394888  | 1.39751750617454  |
| H | 3.810764444909446 | 0.27475581834454  | 2.45867945003667  |
| H | 4.82242539757388  | 0.64864157946654  | 1.04271075918161  |
| H | 4.29466445829847  | -1.02496091277812 | 1.34058531529310  |
| C | -0.31558624624244 | -1.31719332901222 | -2.62294551974191 |
| O | 0.45518988191084  | -2.26374572503416 | -2.25871232439192 |
| N | -0.41753993606995 | -0.76349171315857 | -3.81408274977184 |
| H | 0.25312116361594  | -1.23043857320831 | -4.43789765421305 |

I-4<sub>1</sub>

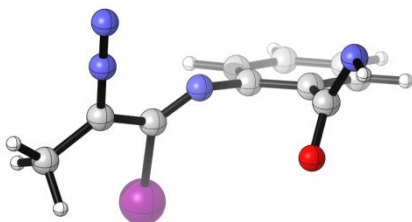

$$E_{\text{PCM}} = -977.0355 E_h$$

$$\text{ZPE} = 0.1665 E_h$$

$$G_{298} = -976.9124 E_h$$

|   |                   |                   |                   |
|---|-------------------|-------------------|-------------------|
| C | -2.73114851568635 | -1.03555302552975 | -1.67343390119116 |
| C | -1.34686259294781 | -0.82591660593055 | -1.58532793807264 |
| C | -0.83849859868596 | -0.16528055249899 | -0.44037809836981 |
| C | -1.71965171832535 | 0.29369173203623  | 0.55990140387970  |
| C | -3.09468212364293 | 0.07247521784607  | 0.44829659612059  |
| C | -3.60425156236408 | -0.60119720275763 | -0.66829767467979 |
| H | -3.12945650519925 | -1.54887415175920 | -2.55296009848620 |
| H | -1.31620102869440 | 0.84102648579206  | 1.41461475069670  |
| H | -3.76644978100617 | 0.43369535557856  | 1.23195754622976  |
| H | -4.67912274973032 | -0.77768678332780 | -0.76359771975868 |
| N | 0.52435366318897  | 0.11783743714418  | -0.35589108695615 |
| N | 3.18568287755452  | 2.05115194209800  | -1.22929464035058 |
| N | 2.99240636549354  | 1.27566831812198  | -0.42274845676417 |
| C | 2.75960137158034  | 0.37828705327900  | 0.50780969060842  |
| C | 1.40291851721804  | -0.14086418935857 | 0.49891484631500  |
| I | 0.99500594804795  | -1.54337372618570 | 2.22509913299140  |
| C | 3.90178895760278  | 0.00798766335248  | 1.42443746937151  |
| H | 3.67268611503274  | 0.26007833927339  | 2.47174357785703  |
| H | 4.80456515595786  | 0.56157050135347  | 1.12995013372131  |
| H | 4.12627069000443  | -1.06847814757226 | 1.36526822213882  |
| C | -0.42005711268961 | -1.34678683122093 | -2.67599533684187 |
| O | 0.35423316358814  | -2.30485236721158 | -2.35012456432110 |
| N | -0.53882512631583 | -0.76057594043961 | -3.84990260009634 |
| H | 0.12174326431717  | -1.21102001874471 | -4.49631819613757 |

I-4<sub>2</sub>

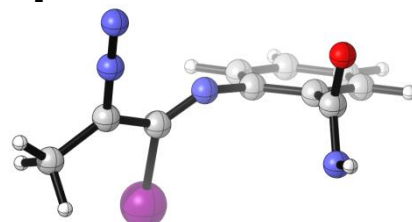

$$E_{\text{PCM}} = -977.0350 E_h$$

$$\text{ZPE} = 0.1664 E_h$$

$$G_{298} = -976.9124 E_h$$

|   |                   |                   |                   |
|---|-------------------|-------------------|-------------------|
| C | -2.73553128095494 | -1.11592938983972 | -1.62397819833832 |
| C | -1.35417260448817 | -0.88216888490551 | -1.55285879187914 |
| C | -0.84722338578319 | -0.16818449269224 | -0.44189426727543 |
| C | -1.72762195400811 | 0.32341661879733  | 0.54381512545061  |
| C | -3.10130173926068 | 0.08961759265756  | 0.44413122303710  |

|   |                   |                   |                   |
|---|-------------------|-------------------|-------------------|
| C | -3.60908138036474 | -0.63851735399978 | -0.63932905061567 |
| H | -3.13249807900527 | -1.67993833422847 | -2.47325306160706 |
| H | -1.32486723877297 | 0.90076382540183  | 1.37888279823939  |
| H | -3.77379818441493 | 0.47890047979011  | 1.21351556247587  |
| H | -4.68266610754332 | -0.82905884155647 | -0.72148110951628 |
| N | 0.51831336707510  | 0.10970818913952  | -0.37121542371082 |
| N | 3.19582581004692  | 1.99042287347844  | -1.30105512038500 |
| N | 2.99738221522828  | 1.24071525629164  | -0.47190620905381 |
| C | 2.75719354776330  | 0.37167842692447  | 0.48376968858415  |
| C | 1.39649916966052  | -0.13584849524407 | 0.48871614423460  |
| I | 0.97623790906113  | -1.49054877086307 | 2.24972893284004  |
| C | 3.89480532753405  | 0.01883630016769  | 1.41293627743573  |
| H | 3.66253534973217  | 0.29733861780779  | 2.45284373654476  |
| H | 4.80093468152304  | 0.56159072094980  | 1.10885849726112  |
| H | 4.11527303400656  | -1.05964413035635 | 1.38110061997871  |
| C | -0.43978665113895 | -1.35795468005103 | -2.67490852971364 |
| O | -0.28350608785434 | -0.54477376672034 | -3.64360433320674 |
| N | 0.07097198765967  | -2.56201597666574 | -2.52944627637036 |
| H | 0.65171139122578  | -2.76280472603947 | -3.35425238495953 |

TS2<sup>c</sup><sub>1</sub>

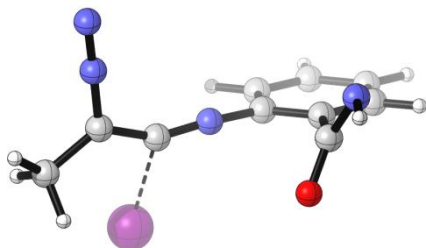

$E_{\text{PCM}} = -977.0295 E_h$

$\text{ZPE} = 0.1660 E_h$

$G_{298} = -976.9073 E_h$

|   |                   |                   |                   |
|---|-------------------|-------------------|-------------------|
| C | -2.74221766716202 | -0.97063047169178 | -1.75921026356488 |
| C | -1.35219990397865 | -0.94929928921367 | -1.58110513873503 |
| C | -0.85215973667744 | -0.33333084620070 | -0.40801423691847 |
| C | -1.71744388432374 | 0.25212794222143  | 0.54154480511987  |
| C | -3.09495915964064 | 0.20833242119819  | 0.33694537778656  |
| C | -3.60741353008909 | -0.40786093821964 | -0.81354455648234 |
| H | -3.15019829878266 | -1.43871272688938 | -2.65828525518952 |
| H | -1.29322026980414 | 0.73879643220587  | 1.42170653948193  |
| H | -3.76793753414071 | 0.65741633773399  | 1.07171108298844  |
| H | -4.68764857162405 | -0.44351753343457 | -0.97868243314651 |
| N | 0.50717769494160  | -0.26661202483068 | -0.20269534467959 |
| N | 3.17800571148002  | 2.35609062068568  | -0.68144921662207 |
| N | 2.99579005905403  | 1.40814367242048  | -0.09540583286598 |
| C | 2.80131688458394  | 0.29591584587126  | 0.60070297131942  |
| C | 1.49523665744720  | -0.21967012840621 | 0.46568844185868  |
| I | 1.00980946659087  | -1.62631236521539 | 2.93084614476984  |
| C | 3.95691929670725  | -0.24787897560158 | 1.40721799878728  |
| H | 3.86264791240807  | 0.01434165872106  | 2.47225619440006  |
| H | 4.89917051913321  | 0.16744838990970  | 1.02182133278486  |
| H | 3.99411445981890  | -1.34178624830520 | 1.31434950418451  |
| C | -0.42246655632008 | -1.60893444723374 | -2.59272662033405 |
| O | 0.26421982047419  | -2.58966506108010 | -2.16180259605791 |
| N | -0.45702933627486 | -1.09218753663534 | -3.80197307007881 |
| H | 0.19329596617881  | -1.62260072800968 | -4.39534882880626 |

TS2<sup>C</sup><sub>2</sub>

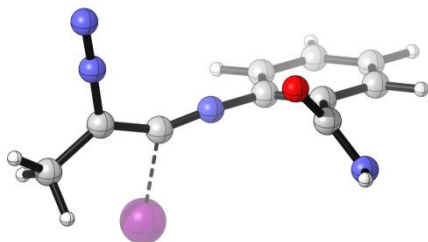

$E_{\text{PCM}} = -977.0294 E_h$

$ZPE = 0.1659 E_h$

$G_{298} = -976.9076 E_h$

|   |                   |                   |                   |
|---|-------------------|-------------------|-------------------|
| C | -2.69192008997823 | -0.98385055893124 | -1.85353664970541 |
| C | -1.30358609217901 | -0.85306575831434 | -1.71149364822946 |
| C | -0.82690301596496 | -0.15633437432778 | -0.57348954459516 |
| C | -1.71398213824232 | 0.39765693217302  | 0.37483724812298  |
| C | -3.08906955669733 | 0.26426344994686  | 0.19326910601391  |
| C | -3.57812421796576 | -0.42800108439192 | -0.92338069731463 |
| H | -3.08085188082360 | -1.52608509247370 | -2.71838896429161 |
| H | -1.30787403844811 | 0.92470814129030  | 1.24034903318592  |
| H | -3.77802946859868 | 0.69756210737747  | 0.92271687789119  |
| H | -4.65616049044439 | -0.53544544300052 | -1.07062249983885 |
| N | 0.52563783564161  | -0.02133107435746 | -0.37259708475968 |
| N | 3.08617207640397  | 2.62091677895778  | -1.05649532255242 |
| N | 2.95594461098767  | 1.69851578323435  | -0.41727036937296 |
| C | 2.82275736405546  | 0.61989240425320  | 0.34147077579222  |
| C | 1.53306504267322  | 0.04484826335235  | 0.26355549721704  |
| I | 1.22366010572310  | -1.44806751070609 | 2.66337849737917  |
| C | 4.02113833510011  | 0.16645531147661  | 1.14097639490723  |
| H | 3.91237265017459  | 0.42030927111350  | 2.20646277610624  |
| H | 4.92473126025677  | 0.65722979401661  | 0.75209585804540  |
| H | 4.14735167674400  | -0.92103294051184 | 1.04773985490690  |
| C | -0.35114628047114 | -1.40407030001172 | -2.76642299807107 |
| O | 0.46095247136270  | -0.56991296100196 | -3.28043095823638 |
| N | -0.49621336177929 | -2.68399787655899 | -3.03649717612722 |
| H | 0.18281847446964  | -2.93374650660447 | -3.76626228747330 |

TS2<sup>C</sup><sub>3</sub>

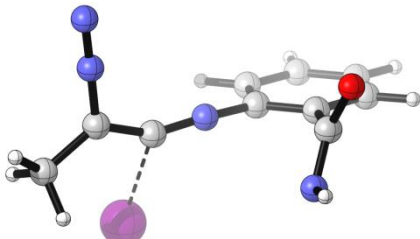

$E_{\text{PCM}} = -977.0290 E_h$

$ZPE = 0.1658 E_h$

$G_{298} = -976.9072 E_h$

|   |                   |                   |                   |
|---|-------------------|-------------------|-------------------|
| C | -2.71578535700133 | -0.91869999245327 | -1.89042119686805 |
| C | -1.32315223256562 | -0.83721445311256 | -1.74529749871353 |
| C | -0.82143794131331 | -0.19165034286401 | -0.59039564297169 |
| C | -1.68938330173198 | 0.35787860743895  | 0.38017433635964  |
| C | -3.06706669883768 | 0.25062288573711  | 0.21090781120863  |
| C | -3.58069821682958 | -0.39315236511596 | -0.92540115378706 |
| H | -3.12565772362035 | -1.40724749309781 | -2.77828845664905 |
| H | -1.26568126380005 | 0.86530759757994  | 1.24880878265741  |
| H | -3.74133685592018 | 0.67119488137463  | 0.96120734029142  |
| H | -4.66204501824914 | -0.47998854310101 | -1.06147831174645 |
| N | 0.53843099166170  | -0.06150527167507 | -0.41980211944942 |
| N | 3.04665799115473  | 2.71422564654988  | -0.91094732279393 |
| N | 2.92995397500736  | 1.74859793813366  | -0.33693141670512 |
| C | 2.81350897342368  | 0.61657583581893  | 0.34404125377695  |
| C | 1.53309462548903  | 0.03400897931382  | 0.23538183907469  |
| I | 1.17026432999009  | -1.38434230319480 | 2.70007437704018  |
| C | 4.01751352104513  | 0.12208762308714  | 1.11038947997746  |
| H | 3.95065560352157  | 0.38242545367085  | 2.17808091363477  |
| H | 4.92846400376698  | 0.57344372937271  | 0.69148305062676  |
| H | 4.09455540387041  | -0.96960999027360 | 1.01705560162293  |

|   |                   |                   |                   |
|---|-------------------|-------------------|-------------------|
| C | -0.40972470558939 | -1.39237127425110 | -2.83137638872398 |
| O | -0.46485973999535 | -0.78867960130631 | -3.95057597252928 |
| N | 0.30962696933262  | -2.43821890536024 | -2.49097293053202 |
| H | 0.86461758819063  | -2.72424108527188 | -3.30770798380123 |

**TS2<sup>c</sup><sub>4</sub>**

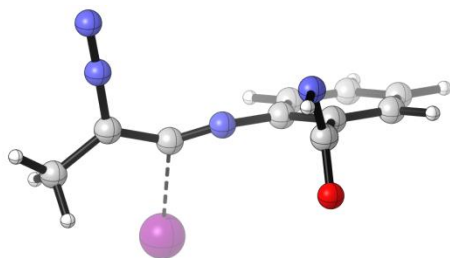

$$E_{\text{PCM}} = -977.0293 E_h$$

$$\text{ZPE} = 0.1658 E_h$$

$$G_{298} = -976.9075 E_h$$

|   |                   |                   |                   |
|---|-------------------|-------------------|-------------------|
| C | -2.66508361103025 | -0.93458098841471 | -1.89299342951912 |
| C | -1.27814642243695 | -0.81007895607025 | -1.73366980717226 |
| C | -0.80514409725603 | -0.15747339214796 | -0.57148861606326 |
| C | -1.69484334820282 | 0.37167294462566  | 0.38946236184829  |
| C | -3.06797813638957 | 0.24075231422712  | 0.19744048054182  |
| C | -3.55290646874200 | -0.41502166979847 | -0.94456971091045 |
| H | -3.05355415754887 | -1.44081972585434 | -2.78088922580581 |
| H | -1.29319832044692 | 0.87987905028594  | 1.26809150072093  |
| H | -3.76140137383909 | 0.64966231629121  | 0.93652273961700  |
| H | -4.63056444056306 | -0.51691414817790 | -1.09820767985978 |
| N | 0.55168163151863  | -0.02560432940262 | -0.38297475501850 |
| N | 3.11424930938481  | 2.67699374050861  | -0.94553591629695 |
| N | 2.97585632859883  | 1.73364105446454  | -0.34087508297426 |
| C | 2.83490206670742  | 0.62708812773096  | 0.37763825832873  |
| C | 1.54903544551042  | 0.05813349964038  | 0.26905532560900  |
| I | 1.17129607480086  | -1.37213536162543 | 2.73419071630577  |
| C | 4.02430105976315  | 0.14442198894905  | 1.17377987691156  |
| H | 3.92728952662085  | 0.40511696094317  | 2.23882856610522  |
| H | 4.94012807230827  | 0.60630528342956  | 0.77787582905090  |
| H | 4.11674728064710  | -0.94654203660339 | 1.08374036736383  |
| C | -0.31825915605249 | -1.40811520645202 | -2.75476804190614 |
| O | -0.05842794436333 | -2.64376176494365 | -2.59958773819172 |
| N | 0.11420854940240  | -0.57749560866530 | -3.67578378682397 |
| H | 0.74088028260860  | -1.09332715694015 | -4.30701211386083 |

**I-5<sub>1</sub>**

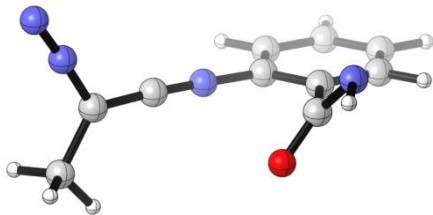

$$E_{\text{PCM}} = -679.1476 E_h$$

$$\text{ZPE} = 0.1663 E_h$$

$$G_{298} = -679.0220 E_h$$

|   |                   |                   |                   |
|---|-------------------|-------------------|-------------------|
| C | -2.66735589935017 | -1.09956382181542 | -1.72838677909551 |
| C | -1.29888175990424 | -0.87027800928012 | -1.52681780514920 |
| C | -0.93848701310266 | -0.13590908565076 | -0.37054928080132 |
| C | -1.89721676648176 | 0.35139920158281  | 0.54038823166003  |
| C | -3.24604191570653 | 0.09370558373343  | 0.31282581096621  |
| C | -3.62748998003929 | -0.63509219121877 | -0.82312824200572 |
| H | -2.97799386937578 | -1.65923453639592 | -2.61296676039073 |
| H | -1.56623416885418 | 0.92516032393875  | 1.40849401127853  |
| H | -3.99771415834108 | 0.46077808626577  | 1.01550310762481  |
| H | -4.68547804972046 | -0.84075290906005 | -1.00671792464121 |
| N | 0.38666828858211  | 0.14331749575999  | -0.11912636325885 |
| N | 3.94689785487795  | 2.53019026344222  | -0.62363511940514 |
| N | 3.42467859209688  | 1.62155911999651  | -0.21615044509542 |
| C | 2.87272551277452  | 0.52340932631111  | 0.29354636908129  |
| C | 1.52167082806450  | 0.34805413516009  | 0.04515652683025  |
| C | 3.73254867874807  | -0.43466290283340 | 1.09761368330400  |

|   |                   |                   |                   |
|---|-------------------|-------------------|-------------------|
| H | 4.12861008770913  | 0.05743888019305  | 1.99923027160567  |
| H | 4.56780157938579  | -0.81298283115031 | 0.48862748606154  |
| H | 3.10868792867415  | -1.28467188495512 | 1.40488054248260  |
| C | -0.25199508040631 | -1.42856293802162 | -2.48585615552918 |
| O | 0.69561222096737  | -2.08976059330679 | -1.95470075563387 |
| N | -0.46873370793241 | -1.16521490994052 | -3.75559036626200 |
| H | 0.28834379733454  | -1.59246680275495 | -4.30317004362680 |

I-5<sub>2</sub>

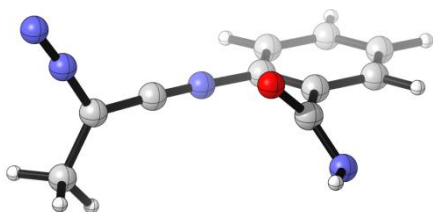

$E_{\text{PCM}} = -679.1476 E_h$

$ZPE = 0.1663 E_h$

$G_{298} = -679.0221 E_h$

|   |                   |                   |                   |
|---|-------------------|-------------------|-------------------|
| C | -2.61421357628201 | -1.11082405469309 | -1.80499523520586 |
| C | -1.26203830495794 | -0.78889896556086 | -1.62157251182974 |
| C | -0.94587719595187 | 0.02895437447403  | -0.50893523813740 |
| C | -1.92991755509421 | 0.49883776643890  | 0.38344057787076  |
| C | -3.26379964290614 | 0.16733901806834  | 0.16250548488611  |
| C | -3.60254256875104 | -0.63659069129506 | -0.93565273266341 |
| H | -2.88969196286806 | -1.74306572600559 | -2.65166538342663 |
| H | -1.62963568202086 | 1.11359131585017  | 1.23450178943072  |
| H | -4.03650896631927 | 0.53106058683804  | 0.84376192488160  |
| H | -4.64865482472675 | -0.89954745886963 | -1.11419546417711 |
| N | 0.36537547063691  | 0.36907428816815  | -0.25858146409164 |
| N | 3.80187182351994  | 2.86574364702465  | -0.98998870365894 |
| N | 3.33633754897589  | 1.94720181388303  | -0.53866919768235 |
| C | 2.85343960146188  | 0.84280645918743  | 0.02572329550642  |
| C | 1.50141650385679  | 0.60861804884212  | -0.15755900692982 |
| C | 3.79299293802305  | -0.07224543743554 | 0.78965033415090  |
| H | 4.34345726065767  | 0.49261784017591  | 1.55704103307170  |
| H | 4.50832640391895  | -0.55905159534919 | 0.10864162354238  |
| H | 3.19459443710569  | -0.84752029513215 | 1.28681756789964  |
| C | -0.19356936315973 | -1.25981870528159 | -2.60342134077043 |
| O | 0.57562216225174  | -0.35865216051439 | -3.06562584778530 |
| N | -0.20771078528419 | -2.54892692376399 | -2.86013347447586 |
| H | 0.54458227791358  | -2.74873114504972 | -3.53076003040571 |

I-5<sub>3</sub>

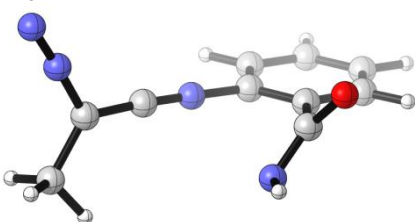

$E_{\text{PCM}} = -679.1472 E_h$

$ZPE = 0.1663 E_h$

$G_{298} = -679.0216 E_h$

|   |                   |                   |                   |
|---|-------------------|-------------------|-------------------|
| C | -2.66127869169254 | -1.05513872443471 | -1.83807128618804 |
| C | -1.29538426874244 | -0.78359495545672 | -1.66731014422001 |
| C | -0.93537531313327 | -0.00823874113530 | -0.53858035571944 |
| C | -1.89252200477054 | 0.46821173452713  | 0.38222086661898  |
| C | -3.23529392359643 | 0.16109494221675  | 0.18983672842959  |
| C | -3.61647899377142 | -0.60524632577702 | -0.92256269899414 |
| H | -2.97263351323988 | -1.63723263736463 | -2.70841907688399 |
| H | -1.56324898853060 | 1.07375130230641  | 1.22918156458488  |
| H | -3.98434034195762 | 0.52011880635795  | 0.89945584727720  |
| H | -4.67062688507385 | -0.84950644600161 | -1.07861619098737 |
| N | 0.38289849646934  | 0.32359712019129  | -0.31958873730163 |
| N | 3.81849756664006  | 2.87354093576514  | -0.88890883628966 |
| N | 3.34975362027120  | 1.93535221436936  | -0.48310524728870 |
| C | 2.86385214333856  | 0.80167063687786  | 0.01494385386173  |
| C | 1.51212406681016  | 0.57627246260326  | -0.18731629770689 |

|   |                   |                   |                   |
|---|-------------------|-------------------|-------------------|
| C | 3.78391313176884  | -0.12445083674057 | 0.78948383347365  |
| H | 3.97907099935453  | 0.26497652190900  | 1.80125441333899  |
| H | 4.73764612033580  | -0.24687539479625 | 0.25494862861008  |
| H | 3.30092178662803  | -1.10747904497556 | 0.87247628365025  |
| C | -0.28898889892089 | -1.28834531009128 | -2.69683722730731 |
| O | -0.55935406797363 | -1.00894824840997 | -3.90723648016489 |
| N | 0.72414114160925  | -1.96833941527855 | -2.20881990471456 |
| H | 1.31218081817734  | -2.27405959666182 | -2.99398953607870 |

I-5<sub>4</sub>

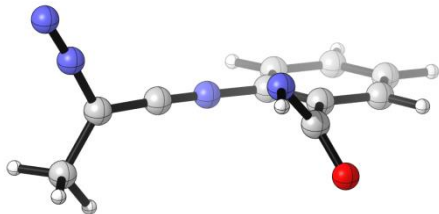

$$E_{\text{PCM}} = -679.1473 E_h$$

$$\text{ZPE} = 0.1662 E_h$$

$$G_{298} = -679.0221 E_h$$

|   |                   |                   |                   |
|---|-------------------|-------------------|-------------------|
| C | -2.60902570897201 | -1.07814310493151 | -1.82277718552058 |
| C | -1.25634113636807 | -0.75081934065584 | -1.64434132080693 |
| C | -0.93416903426282 | 0.03635703349971  | -0.51255632195724 |
| C | -1.91592517020107 | 0.48032432899191  | 0.39818375950142  |
| C | -3.24917233155614 | 0.15159753761114  | 0.17713617480513  |
| C | -3.59307987132640 | -0.62699239344471 | -0.93895235159423 |
| H | -2.88765815636328 | -1.69730316675380 | -2.67860618219626 |
| H | -1.61216014319729 | 1.07313820764517  | 1.26346593604989  |
| H | -4.01860468997547 | 0.49504118242288  | 0.87250524696197  |
| H | -4.63959597742386 | -0.88810257097376 | -1.11752856897114 |
| N | 0.37582147535501  | 0.37621313619613  | -0.25792370815616 |
| N | 3.81255261382392  | 2.87857866935245  | -0.97118028841346 |
| N | 3.34555830414546  | 1.96021855903416  | -0.52092547031586 |
| C | 2.86042238176445  | 0.85685218422803  | 0.04334195546149  |
| C | 1.51030297957360  | 0.61906075127312  | -0.14961667348052 |
| C | 3.79578268453083  | -0.05207761774358 | 0.81956810120090  |
| H | 4.33815127657331  | 0.51772374453032  | 1.58910005588854  |
| H | 4.51840672091525  | -0.54036363627582 | 0.14731231837594  |
| H | 3.19520882643580  | -0.82654183546349 | 1.31541333530297  |
| C | -0.21405878406727 | -1.27407185871878 | -2.62825743959699 |
| O | -0.24090971660620 | -2.52821913618143 | -2.83458493732951 |
| N | 0.57216096728694  | -0.36270903122709 | -3.15541887728750 |
| H | 1.20809008491531  | -0.82983281041523 | -3.81361618792187 |

TS5<sub>1</sub><sup>C</sup>

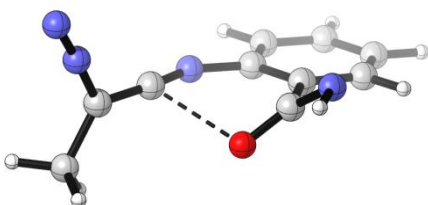

$$E_{\text{PCM}} = -679.1473 E_h$$

$$\text{ZPE} = 0.1662 E_h$$

$$G_{298} = -679.0203 E_h$$

|   |                   |                   |                   |
|---|-------------------|-------------------|-------------------|
| C | -2.40629159271811 | -0.91739443333621 | -2.06756784799352 |
| C | -1.11002717889840 | -0.52688347941750 | -1.69877774448467 |
| C | -0.94589363759476 | -0.04222923432035 | -0.37690477065563 |
| C | -2.02229014786913 | 0.06204261240843  | 0.52242847772495  |
| C | -3.29299401658441 | -0.34548163698093 | 0.12385132926912  |
| C | -3.48050724359639 | -0.83797440801789 | -1.17506365925590 |
| H | -2.56383749606786 | -1.29311912785919 | -3.08004371202155 |
| H | -1.84052588179146 | 0.45926228277688  | 1.52325066618136  |
| H | -4.13278681668546 | -0.27709710564412 | 0.81932833261125  |
| H | -4.47434947347095 | -1.15967261835641 | -1.49775557687486 |
| N | 0.30129043788875  | 0.36988682621109  | 0.07572575837143  |
| N | 3.76833022546615  | 2.67181845473137  | -0.97284687792666 |
| N | 3.31253536259533  | 1.73374731889021  | -0.55530422894211 |
| C | 2.83692707346560  | 0.60111565919124  | -0.03639329024135 |

|   |                   |                   |                   |
|---|-------------------|-------------------|-------------------|
| C | 1.46771117722481  | 0.45025182506423  | -0.07422272394608 |
| C | 3.81122226168725  | -0.45051566567450 | 0.45831161069870  |
| H | 4.60307959534503  | 0.01842738106220  | 1.06110843640416  |
| H | 4.26670086232170  | -0.99424659290816 | -0.38434283843537 |
| H | 3.26486717889083  | -1.16394525870884 | 1.09022026830888  |
| C | 0.05278342175560  | -0.65436863426778 | -2.67789735774921 |
| O | 1.16780652283562  | -1.04210549141790 | -2.19320505865061 |
| N | -0.23240246972167 | -0.35721904545398 | -3.92510009260223 |
| H | 0.61994620752379  | -0.48220593604024 | -4.48414101963946 |

### TS5<sup>C</sup><sub>2</sub>

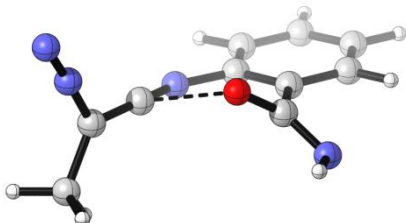

$$E_{\text{PCM}} = -679.1474 E_h$$

$$\text{ZPE} = 0.1661 E_h$$

$$G_{298} = -679.0205 E_h$$

|   |                   |                   |                   |
|---|-------------------|-------------------|-------------------|
| C | -2.47314880978930 | -1.07337557599485 | -1.78826570260264 |
| C | -1.16546911967100 | -0.68905005238465 | -1.45535450958342 |
| C | -1.01725472353112 | 0.12169930512599  | -0.30187641597422 |
| C | -2.11504638016710 | 0.51612179181579  | 0.48361844703458  |
| C | -3.39949765563521 | 0.12090337678367  | 0.11767969759256  |
| C | -3.57451193186619 | -0.67371220786119 | -1.02365418727151 |
| H | -2.61946938916337 | -1.69886909098746 | -2.67065604870571 |
| H | -1.93967097591669 | 1.12963318133331  | 1.36980566967614  |
| H | -4.25873516433724 | 0.42896470517646  | 0.71802754379994  |
| H | -4.57878128412020 | -0.98860702997094 | -1.31968716424408 |
| N | 0.24107887393786  | 0.54940009150180  | 0.10274661764386  |
| N | 3.73869736317724  | 2.57900684554743  | -1.42866840894153 |
| N | 3.26630688646180  | 1.75651448362778  | -0.82741723736910 |
| C | 2.77157967549445  | 0.76097600841948  | -0.09041571669199 |
| C | 1.39959743250727  | 0.63850086609549  | -0.09759690311939 |
| C | 3.72951458642038  | -0.18717144274169 | 0.60617539025351  |
| H | 4.47549472700162  | 0.37792770933098  | 1.18464131110138  |
| H | 4.24365282883699  | -0.83483964382736 | -0.12130944347192 |
| H | 3.15322652513545  | -0.81655644967847 | 1.29778884223571  |
| C | 0.01812664820127  | -1.10043108103587 | -2.32663963662109 |
| O | 0.92359179908407  | -0.22043821550852 | -2.51147711474704 |
| N | -0.03418646661018 | -2.32401440019420 | -2.80084942507773 |
| H | 0.80876055454924  | -2.48061117457299 | -3.36628760491618 |

### TS3<sup>C</sup><sub>1</sub>

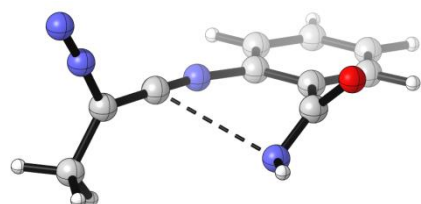

$$E_{\text{PCM}} = -679.1471 E_h$$

$$\text{ZPE} = 0.1662 E_h$$

$$G_{298} = -679.0205 E_h$$

|   |                   |                   |                   |
|---|-------------------|-------------------|-------------------|
| C | -2.59234657088034 | -1.03660389601581 | -1.85228016958427 |
| C | -1.25092347180708 | -0.70886346377160 | -1.60382854557668 |
| C | -0.98704487946625 | 0.04643224787370  | -0.43419889141520 |
| C | -2.01170381417384 | 0.45142627724083  | 0.44488213454522  |
| C | -3.32747496093239 | 0.08764320888675  | 0.17601634358235  |
| C | -3.61406491487804 | -0.66119992261880 | -0.97530462224229 |
| H | -2.82995630884797 | -1.60271124942896 | -2.75573627461974 |
| H | -1.75462624353464 | 1.04657269599510  | 1.32359662047512  |
| H | -4.12778764166674 | 0.39011399966418  | 0.85535197853983  |
| H | -4.64578706650257 | -0.94933608302266 | -1.19395665547701 |
| N | 0.30289135364063  | 0.42968244072777  | -0.13012289683973 |
| N | 3.83882326778783  | 2.66531983749140  | -1.16823291996233 |



|   |                   |                   |                   |
|---|-------------------|-------------------|-------------------|
| N | 3.34544307720905  | 1.79479794983490  | -0.65640937584054 |
| C | 2.82957562068178  | 0.74342265611239  | -0.02169272524739 |
| C | 1.46149527446107  | 0.58046478524028  | -0.13026851277702 |
| C | 3.75675265467621  | -0.19691449832682 | 0.72589487616289  |
| H | 4.38134314327833  | 0.36274408046737  | 1.43834534198048  |
| H | 4.40302619697789  | -0.75049854392673 | 0.02711416914968  |
| H | 3.14368136756467  | -0.91596165464905 | 1.28553185116528  |
| C | -0.17748146786949 | -1.13437845526058 | -2.60185401541949 |
| O | -0.43417909975086 | -0.88202694747180 | -3.82077772003017 |
| N | 0.87491786260741  | -1.72926918949122 | -2.08450343661900 |
| H | 1.50490062142534  | -1.98972527555047 | -2.85312655394991 |

### TS3<sup>C</sup><sub>2</sub>

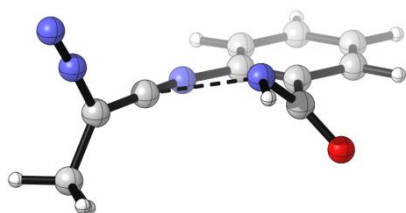

$$E_{\text{PCM}} = -679.1472 E_h$$

$$\text{ZPE} = 0.1661 E_h$$

$$G_{298} = -679.0208 E_h$$

|   |                   |                   |                   |
|---|-------------------|-------------------|-------------------|
| C | -2.52764535586911 | -1.06142934907479 | -1.81308399301220 |
| C | -1.20277777912583 | -0.68811213103301 | -1.54075477103436 |
| C | -0.99152513373419 | 0.10141718187427  | -0.38219807943360 |
| C | -2.05004432182594 | 0.49666275452056  | 0.45897397862850  |
| C | -3.35314051546878 | 0.12218956042920  | 0.14476847584132  |
| C | -3.58865448118844 | -0.65645996854647 | -0.99767527159313 |
| H | -2.72065413681554 | -1.68379074926245 | -2.68957361423864 |
| H | -1.82853816648203 | 1.09198507734346  | 1.34721890621322  |
| H | -4.18084378844729 | 0.43024749206476  | 0.78783257891616  |
| H | -4.60899181347829 | -0.95597623458277 | -1.25163976316386 |
| N | 0.28392653502384  | 0.50026690091610  | -0.02818707205312 |
| N | 3.77006665176102  | 2.72182169807319  | -1.25255577368551 |
| N | 3.30167767260577  | 1.85600568638111  | -0.71095089563033 |
| C | 2.81287218406829  | 0.80910227928722  | -0.04690782491346 |
| C | 1.44415676923706  | 0.64235834088710  | -0.11136501834296 |
| C | 3.77092588739748  | -0.12866266214130 | 0.66400309385078  |
| H | 4.44595089684635  | 0.43823877453595  | 1.32250684107981  |
| H | 4.36557634627941  | -0.70852049264264 | -0.05914967294797 |
| H | 3.18379828156976  | -0.82393992242504 | 1.27915700055221  |
| C | -0.08610156149322 | -1.16975133693394 | -2.46483244511136 |
| O | -0.14409352752389 | -2.39242330194343 | -2.80509971796623 |
| N | 0.79408423855180  | -0.25713495179522 | -2.81722719132593 |
| H | 1.47173271311177  | -0.69416581393189 | -3.45351840062929 |

### I-1N<sub>1</sub>

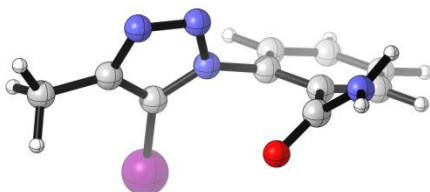

$$E_{\text{PCM}} = -977.5527 E_h$$

$$\text{ZPE} = 0.1826 E_h$$

$$G_{298} = -977.4122 E_h$$

|   |                   |                   |                   |
|---|-------------------|-------------------|-------------------|
| C | -1.37664549394048 | 1.19873286701053  | 0.38116241691485  |
| C | -0.01914742172963 | 1.30346858334817  | 0.69903491690537  |
| C | 0.83698463556045  | 0.22709377796408  | 0.45020620623719  |
| C | 0.35372753440245  | -0.97581702557252 | -0.10007164607288 |
| C | -1.01635017030290 | -1.06951481739450 | -0.39294536683334 |
| C | -1.87431700037487 | 0.01131218330360  | -0.16395641879824 |
| H | -2.04398263772278 | 2.04304036334646  | 0.57039197724862  |
| H | 0.37997558909599  | 2.21390176736343  | 1.15096968831629  |
| H | -1.41121737730118 | -1.99074387566303 | -0.82808950156190 |
| H | -2.93476764503173 | -0.07765359240219 | -0.41252421472815 |
| N | 2.21626328878903  | 0.34495620401962  | 0.82241162971887  |

|   |                  |                   |                   |
|---|------------------|-------------------|-------------------|
| N | 2.70717747048811 | -0.39575699396310 | 1.83332383422924  |
| N | 3.96977617770450 | -0.09913981054358 | 1.96960166566400  |
| C | 4.33451190896322 | 0.84161891471982  | 1.05445303453024  |
| C | 3.20044566738426 | 1.13634385359051  | 0.30594925265588  |
| I | 2.98584098735864 | 2.42821754455753  | -1.31435325524095 |
| C | 1.28817573080525 | -2.11350276426014 | -0.44366101857204 |
| O | 2.32063453023297 | -1.91481360001803 | -1.08884095336423 |
| N | 0.89998028964652 | -3.34035788169283 | -0.03955764893871 |
| H | 0.08846038802043 | -3.48861668220738 | 0.55065706691158  |
| H | 1.47543535542692 | -4.14486273915312 | -0.27385120949937 |
| C | 5.72182504693169 | 1.38544577650009  | 0.95406802335727  |
| H | 5.74220832574908 | 2.47106214920352  | 1.14443512307601  |
| H | 6.14751681333402 | 1.21588862068079  | -0.04834669710769 |
| H | 6.36747800651002 | 0.89163717726229  | 1.69375809495208  |

### I-1N<sub>2</sub>

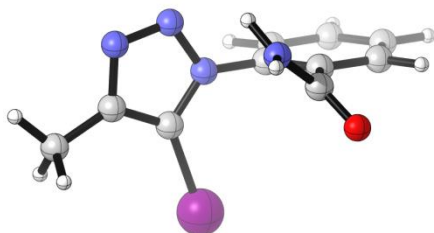

$$E_{\text{PCM}} = -977.5517 E_h$$

$$\text{ZPE} = 0.1826 E_h$$

$$G_{298} = -977.4112 E_h$$

|   |                   |                   |                   |
|---|-------------------|-------------------|-------------------|
| C | -1.49203209554152 | 1.16171226127029  | 0.50956438646389  |
| C | -0.15074411747170 | 1.21749441032617  | 0.89522981534624  |
| C | 0.72290058837908  | 0.18744933698300  | 0.52996378335722  |
| C | 0.27746621259489  | -0.91139703306655 | -0.23088016191030 |
| C | -1.07003534328510 | -0.93585671367052 | -0.62728709530737 |
| C | -1.95025744311860 | 0.08218253464456  | -0.25397154639685 |
| H | -2.17458707668080 | 1.96394021995191  | 0.80032893613493  |
| H | 0.23316775558142  | 2.06009699775010  | 1.47417699461863  |
| H | -1.42467745001824 | -1.77434297370520 | -1.23018321750432 |
| H | -2.99732275371174 | 0.03373795719540  | -0.56316801354034 |
| N | 2.09597452802592  | 0.29683791590986  | 0.94067510483445  |
| N | 2.49503961366935  | -0.18835262601387 | 2.13263651279644  |
| N | 3.77101433797960  | 0.05463146415076  | 2.25448830830957  |
| C | 4.23528857498401  | 0.70628686303584  | 1.15288609587826  |
| C | 3.15239909550456  | 0.86984425707536  | 0.29521889284136  |
| I | 3.05482757150085  | 1.78393738168331  | -1.57324231914238 |
| C | 1.15555418554366  | -2.05300075909487 | -0.69862098699645 |
| O | 1.07451690533685  | -2.45220725157082 | -1.86395323568877 |
| N | 1.97941052743838  | -2.61545652186504 | 0.20726515922326  |
| H | 2.01057991162782  | -2.32223902759188 | 1.17882329100021  |
| H | 2.57339630845495  | -3.38852630795896 | -0.08061941352977 |
| C | 5.66158644361542  | 1.11653059614525  | 0.98851460957829  |
| H | 5.74458030924309  | 2.18645594227731  | 0.73936385920831  |
| H | 6.15012826912538  | 0.54772756936340  | 0.17989445140497  |
| H | 6.21130214122248  | 0.93116550677523  | 1.92187578902051  |

### I-1N<sub>3</sub>

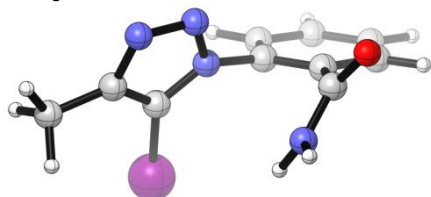

$$E_{\text{PCM}} = -977.5516 E_h$$

$$\text{ZPE} = 0.1825 E_h$$

$$G_{298} = -977.4112 E_h$$

|   |                   |                   |                   |
|---|-------------------|-------------------|-------------------|
| C | -1.25169417262543 | 1.22123686829358  | 0.60841936374323  |
| C | -1.04658235588457 | 0.19365758592523  | 1.53143995473385  |
| C | -0.22258478723409 | -0.88749438138619 | 1.19700092150666  |
| C | 0.39048143094718  | -0.96897772220779 | -0.06701075423985 |
| C | 0.14673428246176  | 0.05853183270304  | -0.99263268819667 |
| C | -0.65475265717586 | 1.15211790772218  | -0.65593951865109 |

|   |                   |                   |                   |
|---|-------------------|-------------------|-------------------|
| H | -1.89126426109971 | 2.06676215940868  | 0.87323339431879  |
| H | -1.53374737432187 | 0.21572137309436  | 2.50835876369886  |
| H | 0.60611187738042  | -0.00083743138464 | -1.98199634271722 |
| H | -0.81861736759876 | 1.94936383258758  | -1.38521168513488 |
| N | -0.06891262969379 | -1.95324035317913 | 2.14431770688326  |
| N | -0.55975797703318 | -3.17749013352404 | 1.86698829262722  |
| N | -0.31200973605889 | -3.94776463344637 | 2.88841590210587  |
| C | 0.34109409469974  | -3.25021590266424 | 3.85951098011527  |
| C | 0.50134710324572  | -1.95301061365909 | 3.38579066204162  |
| I | 1.46612639856459  | -0.33493431408419 | 4.27667782729081  |
| C | 1.26898283621496  | -2.12231373809407 | -0.50367731099751 |
| O | 1.00399716198538  | -2.75189944355885 | -1.53052823114185 |
| N | 2.34596770321298  | -2.38711039482770 | 0.26237448877150  |
| H | 2.61109981191376  | -1.80552028682141 | 1.04984097722313  |
| H | 2.97125385178787  | -3.14304353887297 | -0.00457705630198 |
| C | 0.76054278051939  | -3.85955298008141 | 5.15674283118811  |
| H | 0.27050503587550  | -3.36229778386220 | 6.00982152945196  |
| H | 1.84959742848025  | -3.77737860305031 | 5.30494967046888  |
| H | 0.48696716943668  | -4.92384557803005 | 5.17158867921203  |

### I-1N<sub>4</sub>

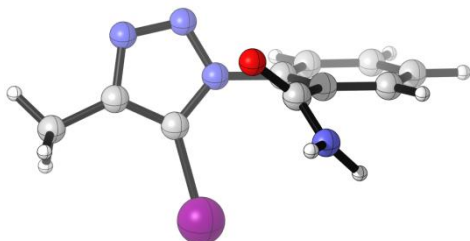

$$E_{\text{PCM}} = -977.5516 E_h$$

$$\text{ZPE} = 0.1827 E_h$$

$$G_{298} = -977.4109 E_h$$

|   |                   |                   |                   |
|---|-------------------|-------------------|-------------------|
| C | -1.55618611091073 | 1.10418503255594  | 0.60091600238504  |
| C | -0.21032286238111 | 1.18816550630060  | 0.97043203963243  |
| C | 0.69602507773017  | 0.22118622420291  | 0.52745163344360  |
| C | 0.28152909867813  | -0.84278568445496 | -0.29945375527999 |
| C | -1.07165495590455 | -0.89876359128095 | -0.67274466480884 |
| C | -1.98522188943282 | 0.05990389858035  | -0.22275433681008 |
| H | -2.26416145761630 | 1.85772596645025  | 0.95443527436023  |
| H | 0.14868705261388  | 2.00547926857290  | 1.59920709620052  |
| H | -1.42217360975011 | -1.72060312474172 | -1.30127928001199 |
| H | -3.03540707089081 | -0.01438712659127 | -0.51558743799632 |
| N | 2.06367247119373  | 0.34911403964227  | 0.94315539636415  |
| N | 2.41425457826762  | 0.06148322651704  | 2.20901311844424  |
| N | 3.69654603226374  | 0.26954674543481  | 2.32572843371433  |
| C | 4.21414878559131  | 0.70129332896792  | 1.14180980605253  |
| C | 3.15891496048244  | 0.75880332785280  | 0.23906877245688  |
| I | 3.14363737871143  | 1.39466197505090  | -1.74543618982312 |
| C | 1.23308984990188  | -1.93960903616273 | -0.72086455228075 |
| O | 2.03501717117955  | -2.43293942290703 | 0.07621452349215  |
| N | 1.12217008072942  | -2.35973062987027 | -1.99865610235796 |
| H | 0.52493236720078  | -1.89753902604840 | -2.67543037724422 |
| H | 1.71840322416967  | -3.11564132878298 | -2.32400534184579 |
| C | 5.66030856447314  | 1.02377863829481  | 0.95482539595731  |
| H | 5.79525856089706  | 2.03467492985754  | 0.53785070810427  |
| H | 6.14356772054591  | 0.31229124901908  | 0.26467798841800  |
| H | 6.17962178125656  | 0.97282644854020  | 1.92205737043338  |

**TS1<sup>D</sup><sub>1</sub>**

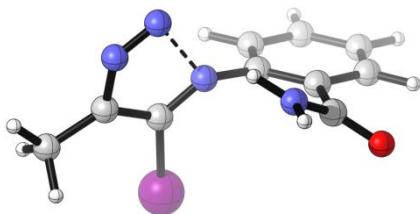

$$E_{\text{PCM}} = -977.5099 E_h$$

$$\text{ZPE} = 0.1794 E_h$$

$$G_{298} = -977.3728 E_h$$

|   |                   |                   |                   |
|---|-------------------|-------------------|-------------------|
| C | -2.90889646315150 | 1.71106455277891  | -0.86419169620280 |
| C | -1.63781285474781 | 1.58332741279313  | -0.30631222932563 |
| C | -0.88490527261400 | 0.40353483277122  | -0.47900011599920 |
| C | -1.43119999926142 | -0.67036794384543 | -1.23041470259632 |
| C | -2.70995482549541 | -0.50806046450603 | -1.79409231152111 |
| C | -3.45183809467672 | 0.65878377806798  | -1.61204796322248 |
| H | -3.47536294129709 | 2.63396195037612  | -0.71351036208157 |
| H | -1.20566634662393 | 2.39721328892969  | 0.27989431750487  |
| H | -3.11711182928819 | -1.33074855327613 | -2.38466476299290 |
| H | -4.44821748987789 | 0.74750558598000  | -2.05178042398327 |
| N | 0.36725677232360  | 0.32504131598598  | 0.13678413321636  |
| N | 1.02546629875612  | -0.46075776267440 | 1.99279124147733  |
| N | 2.08467940106261  | 0.02217186384564  | 1.82697271534987  |
| C | 2.56159798026454  | 0.77744372228516  | 0.82748106037176  |
| C | 1.48190474876922  | 0.91756429697865  | -0.11337901911284 |
| I | 1.83152289153463  | 2.08017388274905  | -1.87150289621660 |
| C | -0.74108993749310 | -1.98445655820205 | -1.52108291886327 |
| O | -1.03595696725178 | -2.62788110207193 | -2.53655480452693 |
| N | 0.16114566987097  | -2.44330673790972 | -0.63000723806384 |
| H | 0.42188660934782  | -1.91740348933483 | 0.19779512291528  |
| H | 0.62912998472616  | -3.32492083331155 | -0.81885008505369 |
| C | 3.95817010392342  | 1.31210300121503  | 0.78980426700284  |
| H | 3.97379262958558  | 2.41323974530673  | 0.74439227781268  |
| H | 4.52200830444539  | 0.93003464733838  | -0.07705852679743 |
| H | 4.48776062716876  | 1.00248556773041  | 1.70158892090890  |

**TS1<sup>D</sup><sub>2</sub>**

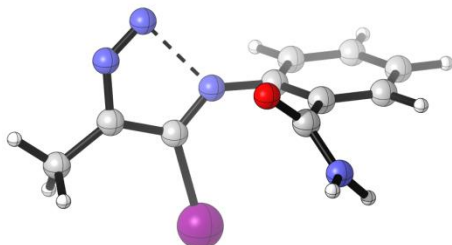

$$E_{\text{PCM}} = -977.5081 E_h$$

$$\text{ZPE} = 0.1791 E_h$$

$$G_{298} = -977.3715 E_h$$

|   |                   |                   |                   |
|---|-------------------|-------------------|-------------------|
| C | -3.17612026051979 | 1.62431972608771  | -0.74050651002063 |
| C | -1.90565651910728 | 1.60873298877426  | -0.16238000089226 |
| C | -1.02172146191940 | 0.53746657153859  | -0.39299783000353 |
| C | -1.43545355889001 | -0.54223864563407 | -1.21606661335077 |
| C | -2.71633098200827 | -0.50178185210504 | -1.79384771882556 |
| C | -3.58654535150718 | 0.56626850592608  | -1.55937451053030 |
| H | -3.84648806867149 | 2.46643348356160  | -0.54908650127986 |
| H | -1.57327174825573 | 2.43105079634987  | 0.47486877361810  |
| H | -3.04564016675200 | -1.33485133747605 | -2.41993898340883 |
| H | -4.58223312901992 | 0.56707361605423  | -2.00948601073909 |
| N | 0.22287951291417  | 0.56574033816457  | 0.23255276407966  |
| N | 0.84044339400829  | 0.19648683379573  | 2.24711847035502  |
| N | 1.95401423045687  | 0.39411797066424  | 1.93225088434140  |
| C | 2.50446049062439  | 0.71111066804219  | 0.75281006448467  |
| C | 1.41237270623033  | 0.79182019675164  | -0.18473828339912 |
| I | 1.87883934762410  | 1.32811600579208  | -2.20726989327147 |
| C | -0.56621195709251 | -1.75828230851802 | -1.42342889171516 |
| O | 0.00309721319726  | -2.31896225905314 | -0.48231000419226 |
| N | -0.48859909446826 | -2.21892661812026 | -2.69215553946762 |

|   |                   |                   |                   |
|---|-------------------|-------------------|-------------------|
| H | -0.87761019253567 | -1.71140638533101 | -3.47913301437457 |
| H | 0.05543780911229  | -3.05582001351940 | -2.88274582909487 |
| C | 3.97133706007343  | 0.93125572088900  | 0.55789477278535  |
| H | 4.19074146926402  | 1.94927778425457  | 0.19611000216764  |
| H | 4.40400587644785  | 0.21696196521638  | -0.16190152920701 |
| H | 4.48656238079452  | 0.79645024789423  | 1.51930393194108  |

### I-8<sub>1</sub>

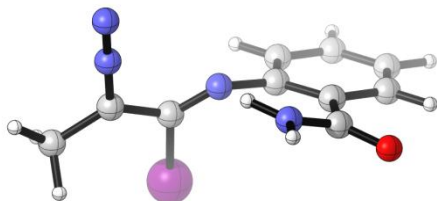

$$E_{\text{PCM}} = -977.5315 E_h$$

$$\text{ZPE} = 0.1797 E_h$$

$$G_{298} = -977.3350 E_h$$

|   |                   |                   |                   |
|---|-------------------|-------------------|-------------------|
| C | -2.84711241333727 | 1.73712474438414  | -0.97067273170601 |
| C | -1.59320093034638 | 1.56048485475856  | -0.38793965697445 |
| C | -0.88912612516151 | 0.34533672909696  | -0.52880870113729 |
| C | -1.48244739412674 | -0.72145963921827 | -1.26077934724712 |
| C | -2.74076120109272 | -0.50648635914140 | -1.85153603036282 |
| C | -3.42592697682735 | 0.70029275073876  | -1.71333240039576 |
| H | -3.37337003520578 | 2.68688676490144  | -0.84148897686464 |
| H | -1.14354812340937 | 2.36098493295157  | 0.20252508000488  |
| H | -3.17918456132534 | -1.32508944970629 | -2.42474796468116 |
| H | -4.40771243045081 | 0.82931402860308  | -2.17545164547722 |
| N | 0.33819552320869  | 0.19876559504510  | 0.11240867643113  |
| N | 2.11089691870117  | -0.69018292554242 | 2.86467616247116  |
| N | 2.31099273169841  | -0.02984055676597 | 1.96548834460174  |
| C | 2.53780582125899  | 0.74100800298525  | 0.92181974406535  |
| C | 1.40667842028574  | 0.87118917958222  | 0.02870703400635  |
| I | 1.72767889863137  | 2.36769523627913  | -1.58721697308712 |
| C | -0.87622994623149 | -2.09092448261297 | -1.47267791951311 |
| O | -1.35104143467020 | -2.86154935206179 | -2.31858775964920 |
| N | 0.16706943882589  | -2.45314044302094 | -0.69763690795527 |
| H | 0.56102604760730  | -1.81556218268647 | -0.01038543356483 |
| H | 0.57140876755797  | -3.37684219110191 | -0.81931488945848 |
| C | 3.90677095605321  | 1.37003255877342  | 0.80471747439415  |
| H | 3.84927916720112  | 2.46808052828204  | 0.86835473404686  |
| H | 4.38700056883521  | 1.09728003161564  | -0.14769160015793 |
| H | 4.54688531231989  | 1.01369764386108  | 1.62388668821082  |

### I-8<sub>2</sub>

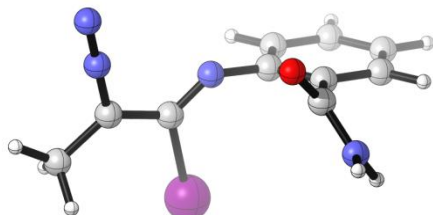

$$E_{\text{PCM}} = -977.5287 E_h$$

$$\text{ZPE} = 0.1794 E_h$$

$$G_{298} = -977.3322 E_h$$

|   |                   |                   |                   |
|---|-------------------|-------------------|-------------------|
| C | -1.32948322866160 | 1.85391617173024  | -0.31304169505561 |
| C | -0.05153097405676 | 1.73553883457875  | 0.23667232532728  |
| C | 0.68858247849870  | 0.54687117608675  | 0.08371599522340  |
| C | 0.12174401752205  | -0.53705017707569 | -0.63151335412174 |
| C | -1.15876695241156 | -0.39099169224630 | -1.19081265185618 |
| C | -1.88925740792758 | 0.79006946775314  | -1.02997753300578 |
| H | -1.88894785942850 | 2.78391455929349  | -0.18003270065474 |
| H | 0.39055602381693  | 2.56272916000316  | 0.79636178944187  |
| H | -1.59609023916714 | -1.22527326170155 | -1.74560836178601 |
| H | -2.89032906982233 | 0.87606111777818  | -1.45950471143100 |
| N | 1.94434825830141  | 0.44243069622091  | 0.67326657405830  |
| N | 4.00974183869784  | -0.45210118184898 | 3.20757970336167  |
| N | 4.14424919711883  | 0.12224439389534  | 2.23826978720713  |
| C | 4.28799468458273  | 0.78570225538207  | 1.11308842253333  |

|   |                  |                   |                   |
|---|------------------|-------------------|-------------------|
| C | 3.06235166973771 | 0.91296184974785  | 0.34530286581231  |
| I | 3.32292315096087 | 2.04546779758167  | -1.56882104656356 |
| C | 0.85151118729828 | -1.85125085363694 | -0.76393027845027 |
| O | 1.29242953531335 | -2.45376104105607 | 0.21981093324460  |
| N | 0.95497036696831 | -2.34145953746006 | -2.01905772520151 |
| H | 0.65390625397686 | -1.81503190013151 | -2.83195783277023 |
| H | 1.40055358752638 | -3.24287148763875 | -2.16754007730501 |
| C | 5.66351710175956 | 1.31265998082945  | 0.77855226310374  |
| H | 5.65402250755984 | 2.40848323216814  | 0.67058217930045  |
| H | 6.04483592066272 | 0.87170059120879  | -0.15598339693983 |
| H | 6.36308395117309 | 1.05648484853790  | 1.58663952652737  |

### I-6

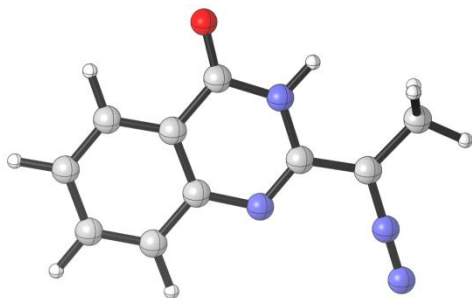

$$E_{\text{PCM}} = -679.2602 E_h$$

$$\text{ZPE} = 0.1708 E_h$$

$$G_{298} = -679.1273 E_h$$

|   |                   |                   |                    |
|---|-------------------|-------------------|--------------------|
| C | -3.41326182127683 | 1.32256070997539  | -0.87922758672705  |
| C | -2.26164672774949 | 1.31974778101138  | -0.10342641711472  |
| C | -1.15193269375239 | 0.51722543562494  | -0.46745697321508  |
| C | -1.25184462955901 | -0.28142450264977 | -1.64217488646695  |
| C | -2.42846405965111 | -0.26695920814969 | -2.41797516463729  |
| C | -3.50382513182686 | 0.52837832095550  | -2.04327405028125  |
| H | -4.26032045363219 | 1.94833240220488  | -0.58447892332461  |
| H | -2.18743266183459 | 1.93287452982094  | 0.79760338290655   |
| H | -2.47719955912599 | -0.88894222630379 | -3.31449726113428  |
| H | -4.41609574140848 | 0.54059542648905  | -2.64459533053550  |
| N | -0.02263801885679 | 0.53746789062705  | 0.32146136717676   |
| N | 2.24539125510891  | 1.20004374324253  | 2.73478415830962   |
| N | 2.23239072586211  | 0.53480014018575  | 1.81323097382397   |
| C | 2.22116102255472  | -0.23147084231191 | 0.75397020091568   |
| C | 0.99522860685780  | -0.20635045880789 | -0.02929637423358  |
| O | -0.10646379831881 | -1.11126581791967 | -2.02226597160775  |
| C | -0.04374671747631 | -1.85127738125219 | -3.00495374544697  |
| N | 0.97319364060023  | -1.00672114259372 | -1.15354336307281  |
| C | 3.44745618168651  | -1.05448278867852 | 0.43446884567100   |
| H | 3.87312337642395  | -0.77240563211922 | -0.543387444831056 |
| H | 3.20947775380801  | -2.13145673541231 | 0.41548710259152   |
| H | 4.22113102478926  | -0.89457293481054 | 1.19736695322550   |
| H | 1.78741842677734  | -1.56949670912822 | -1.39361948851220  |

### I-7

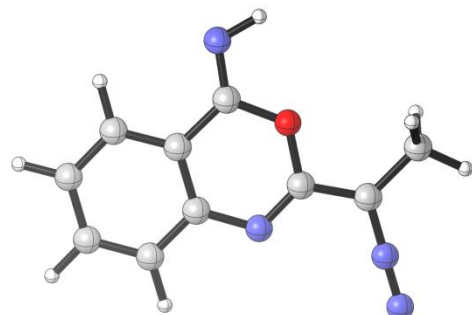

$$E_{\text{PCM}} = -679.2162 E_h$$

$$\text{ZPE} = 0.1695 E_h$$

$$G_{298} = -679.0849 E_h$$

|   |                   |                   |                   |
|---|-------------------|-------------------|-------------------|
| C | -3.51788453022309 | 1.30378146987168  | -0.97516779870367 |
| C | -2.39017458723828 | 1.33906653891820  | -0.15988048366448 |
| C | -1.25772225012425 | 0.55941098443245  | -0.47728386088152 |
| C | -1.28902064631405 | -0.25829497576367 | -1.63543183236590 |
| C | -2.43521007532718 | -0.28461791293444 | -2.45018477795749 |

|   |                   |                   |                   |
|---|-------------------|-------------------|-------------------|
| C | -3.54473737371542 | 0.49165432520680  | -2.12489113996611 |
| H | -4.38899531057103 | 1.91316404636878  | -0.71936569246732 |
| H | -2.35912470290369 | 1.96653886551187  | 0.73368057540224  |
| H | -2.44148799910296 | -0.91952384063369 | -3.33823991315248 |
| H | -4.43347677555315 | 0.46957677722064  | -2.76020019063970 |
| N | -0.14317739818934 | 0.61227159910185  | 0.34729574982962  |
| N | 2.17579277517334  | 1.27820388519890  | 2.78715043659782  |
| N | 2.14243672436652  | 0.61829222124777  | 1.86308661558067  |
| C | 2.11187345487893  | -0.14377257115730 | 0.79948559338546  |
| C | 0.88322381559201  | -0.10718614348948 | 0.03448968432363  |
| C | -0.10307014390673 | -1.06157147582883 | -1.94860459183491 |
| N | 0.02364519010033  | -1.84326584820370 | -2.94465945486599 |
| O | 0.95205478114812  | -0.92709797455642 | -1.05349463479430 |
| C | 3.32050915014634  | -0.98000927176231 | 0.45174355792047  |
| H | 3.71840217526954  | -0.70099740513835 | -0.53673148211486 |
| H | 3.06127184797336  | -2.05021355102307 | 0.42873017754124  |
| H | 4.11171734855421  | -0.83094440598947 | 1.19893566852817  |
| H | 0.94285452996644  | -2.29486533659822 | -2.95146220570056 |

### TS4<sup>c</sup>

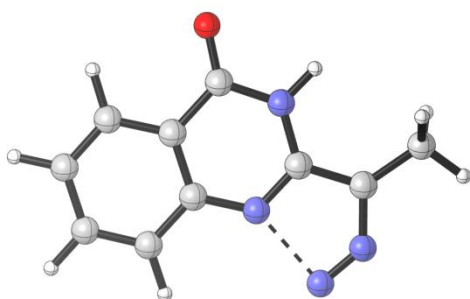

$$E_{\text{PCM}} = -679.2378 E_h$$

$$\text{ZPE} = 0.1702 E_h$$

$$G_{298} = -679.1046 E_h$$

|   |                   |                   |                   |
|---|-------------------|-------------------|-------------------|
| C | -3.27463135031555 | 1.39760511500852  | -0.71051426648051 |
| C | -2.08691001232811 | 1.35836142537192  | 0.01102400602557  |
| C | -1.03764348592974 | 0.51222934095809  | -0.40808956912302 |
| C | -1.21346340094535 | -0.29225688591871 | -1.56753646777119 |
| C | -2.42471658204030 | -0.23700062755173 | -2.28292947882596 |
| C | -3.45044184610336 | 0.60133141175143  | -1.86110434448055 |
| H | -4.08227772619161 | 2.05623108878899  | -0.37969904427641 |
| H | -1.94612462491147 | 1.97331433969080  | 0.90221414045907  |
| H | -2.53971625241132 | -0.86271786176777 | -3.17079193382276 |
| H | -4.38967610977943 | 0.64368991599483  | -2.41754300599219 |
| N | 0.14628719490916  | 0.46229821662409  | 0.29388765109725  |
| N | 1.13086444876415  | 1.23255084240773  | 1.93828865871676  |
| N | 2.08725825146101  | 0.58094779974016  | 1.69906970885532  |
| C | 2.32419982566792  | -0.28713265587570 | 0.71330354097822  |
| C | 1.13309157158111  | -0.32030477764517 | -0.09224308578294 |
| C | -0.11957362439298 | -1.17578187367509 | -2.00288579286731 |
| O | -0.15331678607942 | -1.92054915591837 | -2.98042057683014 |
| N | 1.01725317493025  | -1.11947893636053 | -1.20319592838027 |
| C | 3.59651792967551  | -1.05176406065639 | 0.53028280971479  |
| H | 4.06716812485601  | -0.83743073558112 | -0.44461898498490 |
| H | 3.43447246552218  | -2.14181913012045 | 0.59111117669283  |
| H | 4.31148288311903  | -0.77339521507619 | 1.31663501603981  |
| H | 1.79339593094233  | -1.71862758018931 | -1.48164422896144 |

TS6<sup>c</sup>

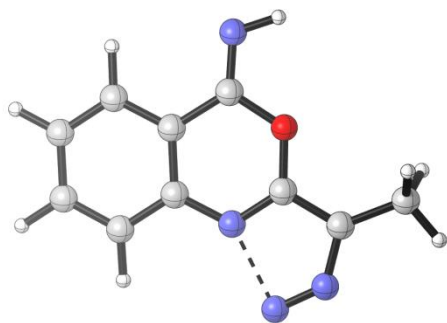

$$E_{\text{PCM}} = -679.1895 E_h$$

$$\text{ZPE} = 0.1690 E_h$$

$$G_{298} = -679.0576 E_h$$

|   |                   |                   |                   |
|---|-------------------|-------------------|-------------------|
| C | -3.29265483131937 | 1.39269600642839  | -0.70911250528066 |
| C | -2.10780435370336 | 1.35463058502483  | 0.02221069679882  |
| C | -1.05428266139485 | 0.52299551860884  | -0.39920525739767 |
| C | -1.20436630451024 | -0.27246472376958 | -1.56329425618986 |
| C | -2.40801762805866 | -0.21917743591550 | -2.28810261232268 |
| C | -3.44674187999391 | 0.60773068888281  | -1.86653097363061 |
| H | -4.10896683367450 | 2.04041713081724  | -0.37851555199033 |
| H | -1.97756576686822 | 1.96036266629031  | 0.92121657108514  |
| H | -2.51311252017427 | -0.83520472218160 | -3.18322870215165 |
| H | -4.37948774930297 | 0.64509430247247  | -2.43408960330015 |
| N | 0.13532751594161  | 0.46791910702427  | 0.30661777327017  |
| N | 1.11862278719495  | 1.20726597851644  | 1.92173812734163  |
| N | 2.08610291906164  | 0.56352100685899  | 1.69077710891416  |
| C | 2.30785582825125  | -0.29713576355102 | 0.68937424207344  |
| C | 1.11221993202445  | -0.30510694614559 | -0.09073402126415 |
| C | -0.09414721369761 | -1.13978430012038 | -1.98559333042670 |
| N | -0.10230622268336 | -1.90328438712696 | -2.99968201116330 |
| O | 1.05039497865330  | -1.09749216115315 | -1.18136025593365 |
| C | 3.56670942474588  | -1.07315172008899 | 0.47423267801134  |
| H | 4.01159833270098  | -0.85854452913083 | -0.51133239343177 |
| H | 3.39051406256697  | -2.16020140355243 | 0.53167606321452  |
| H | 4.30203580909326  | -0.80565381400428 | 1.24562059264511  |
| H | 0.78027237514705  | -2.41343108418434 | -3.09858237887110 |



## UV-vis and fluorescence spectra

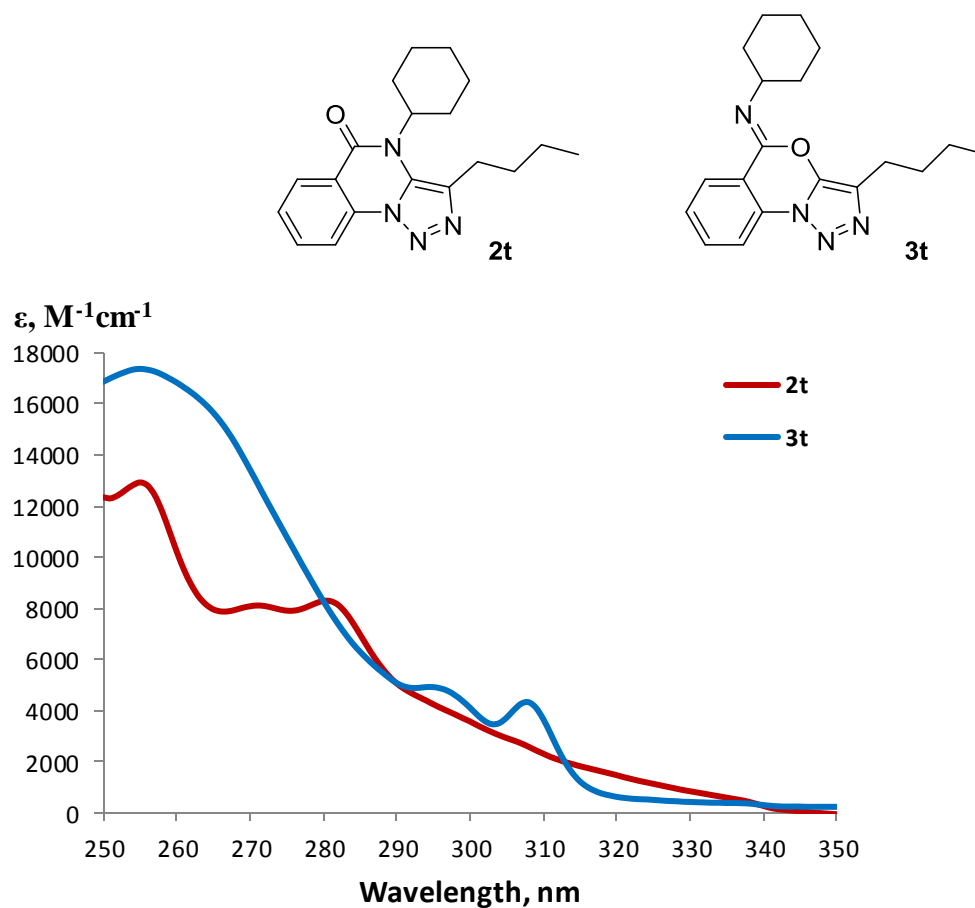

**Figure S1.** UV-vis spectra for compounds **2t** and **3t** in  $\text{CH}_2\text{Cl}_2$  ( $C = 10^{-5} \text{ M}$ ).

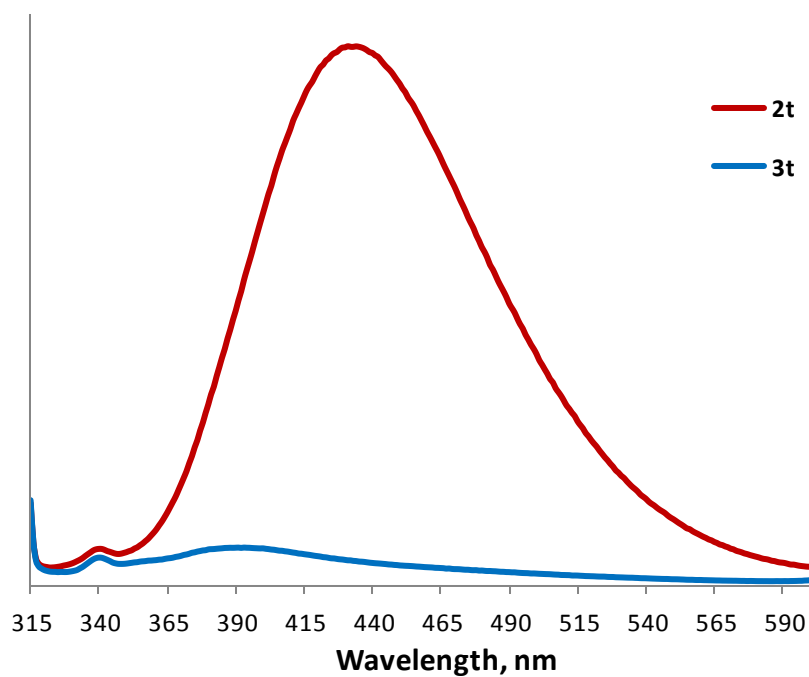

**Figure S2.** Fluorescence spectra for compounds **2t** and **3t** in  $\text{CH}_2\text{Cl}_2$  ( $C = 10^{-5} \text{ M}$ ,  $\lambda_{\text{ex}} = 308 \text{ nm}$ ).

# Copies of IR spectra

## 3-Butyl-4-methyl[1,2,3]triazolo[1,5-a]quinazolin-5(4H)-one (2a)

IR (KBr)

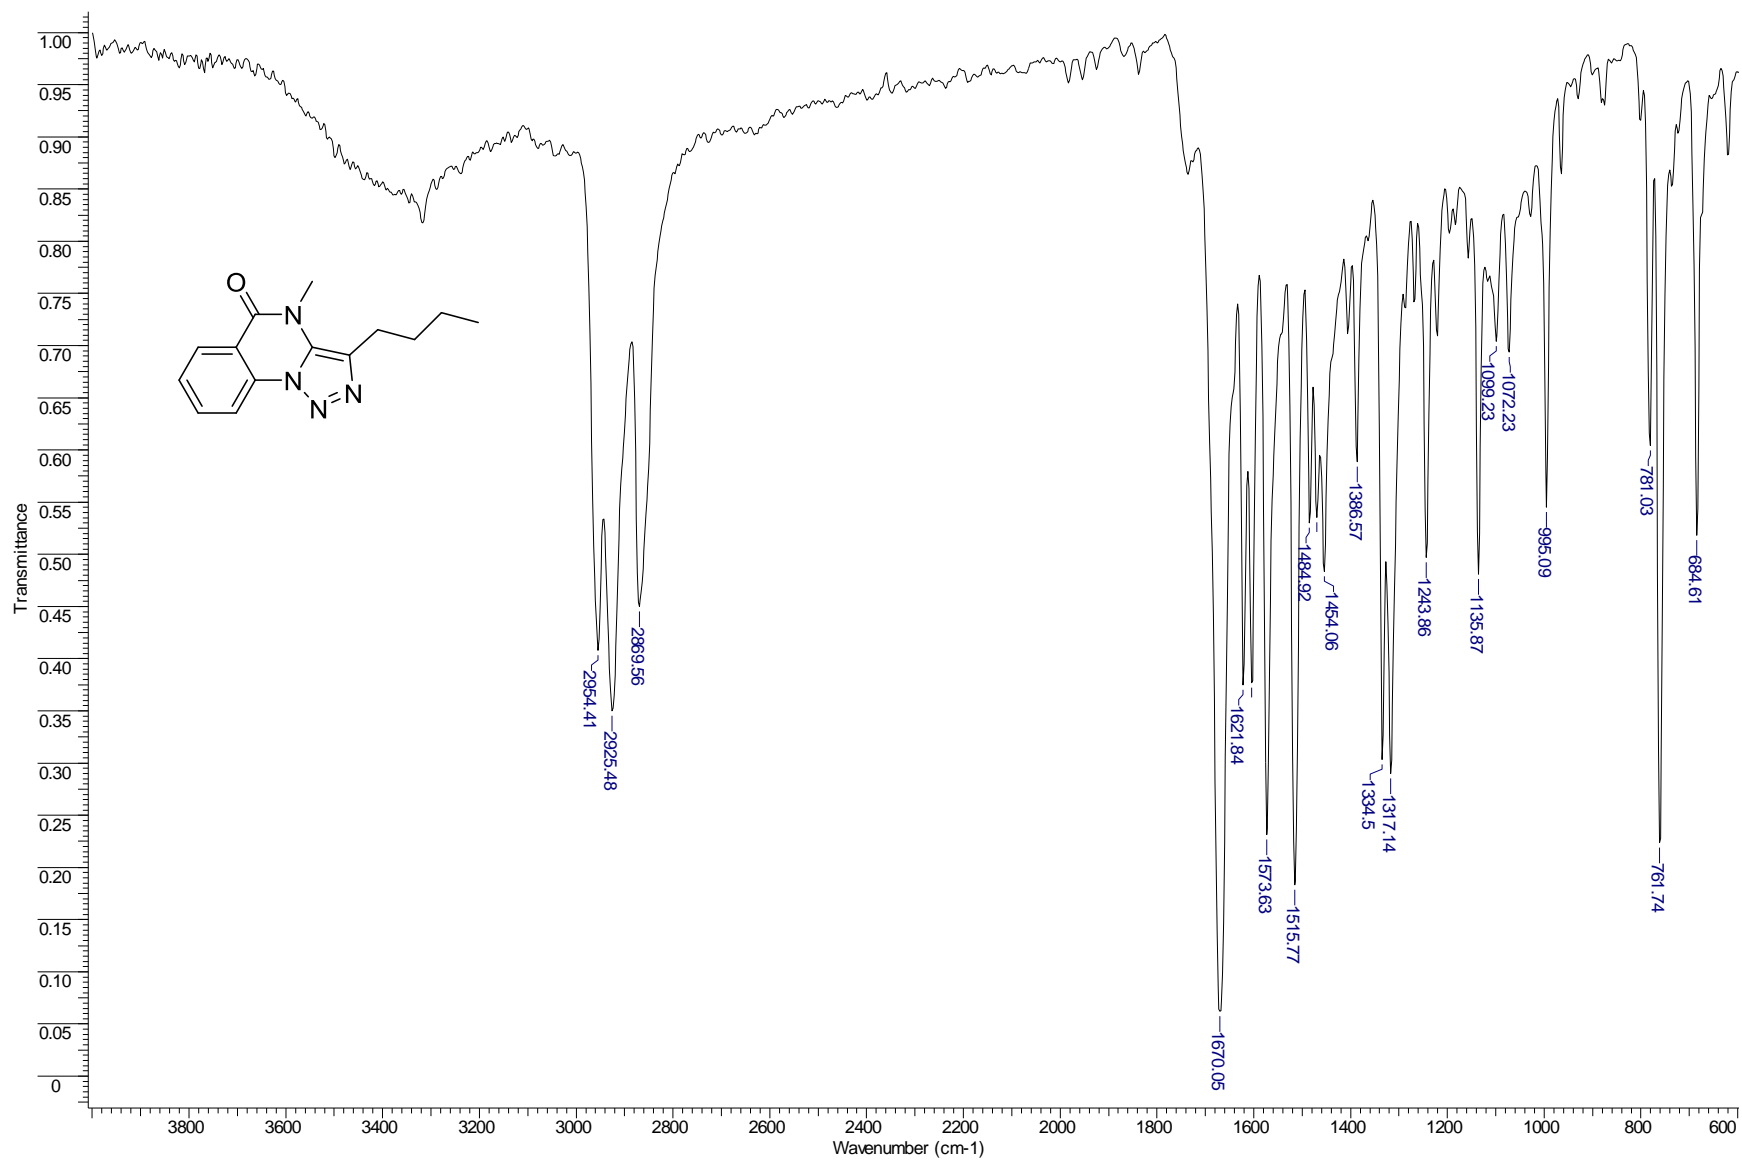

3-Butyl[1,2,3]triazolo[1,5-a]quinazolin-5(4H)-one (2p)

IR (KBr)

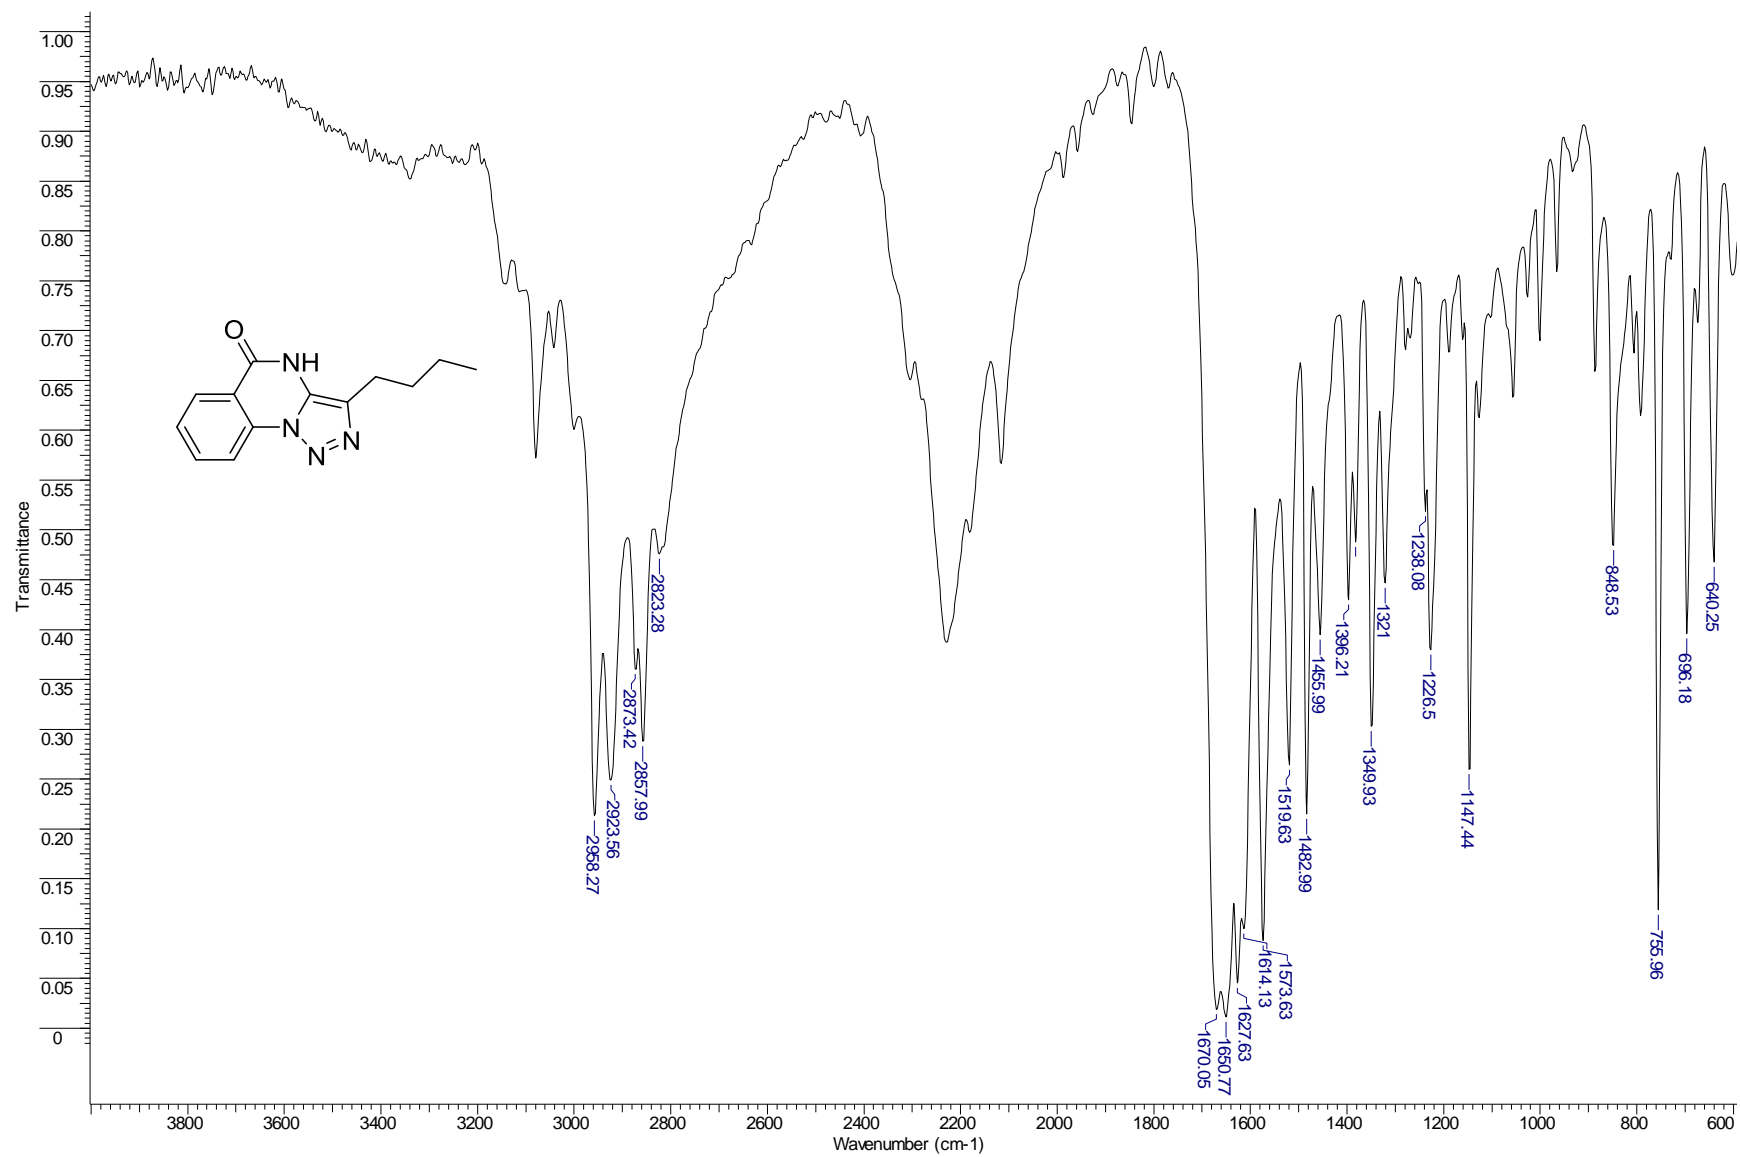

3-Butyl-4-(4-methylphenyl)[1,2,3]triazolo[1,5-a]quinazolin-5(4H)-one (2q)

IR (KBr)

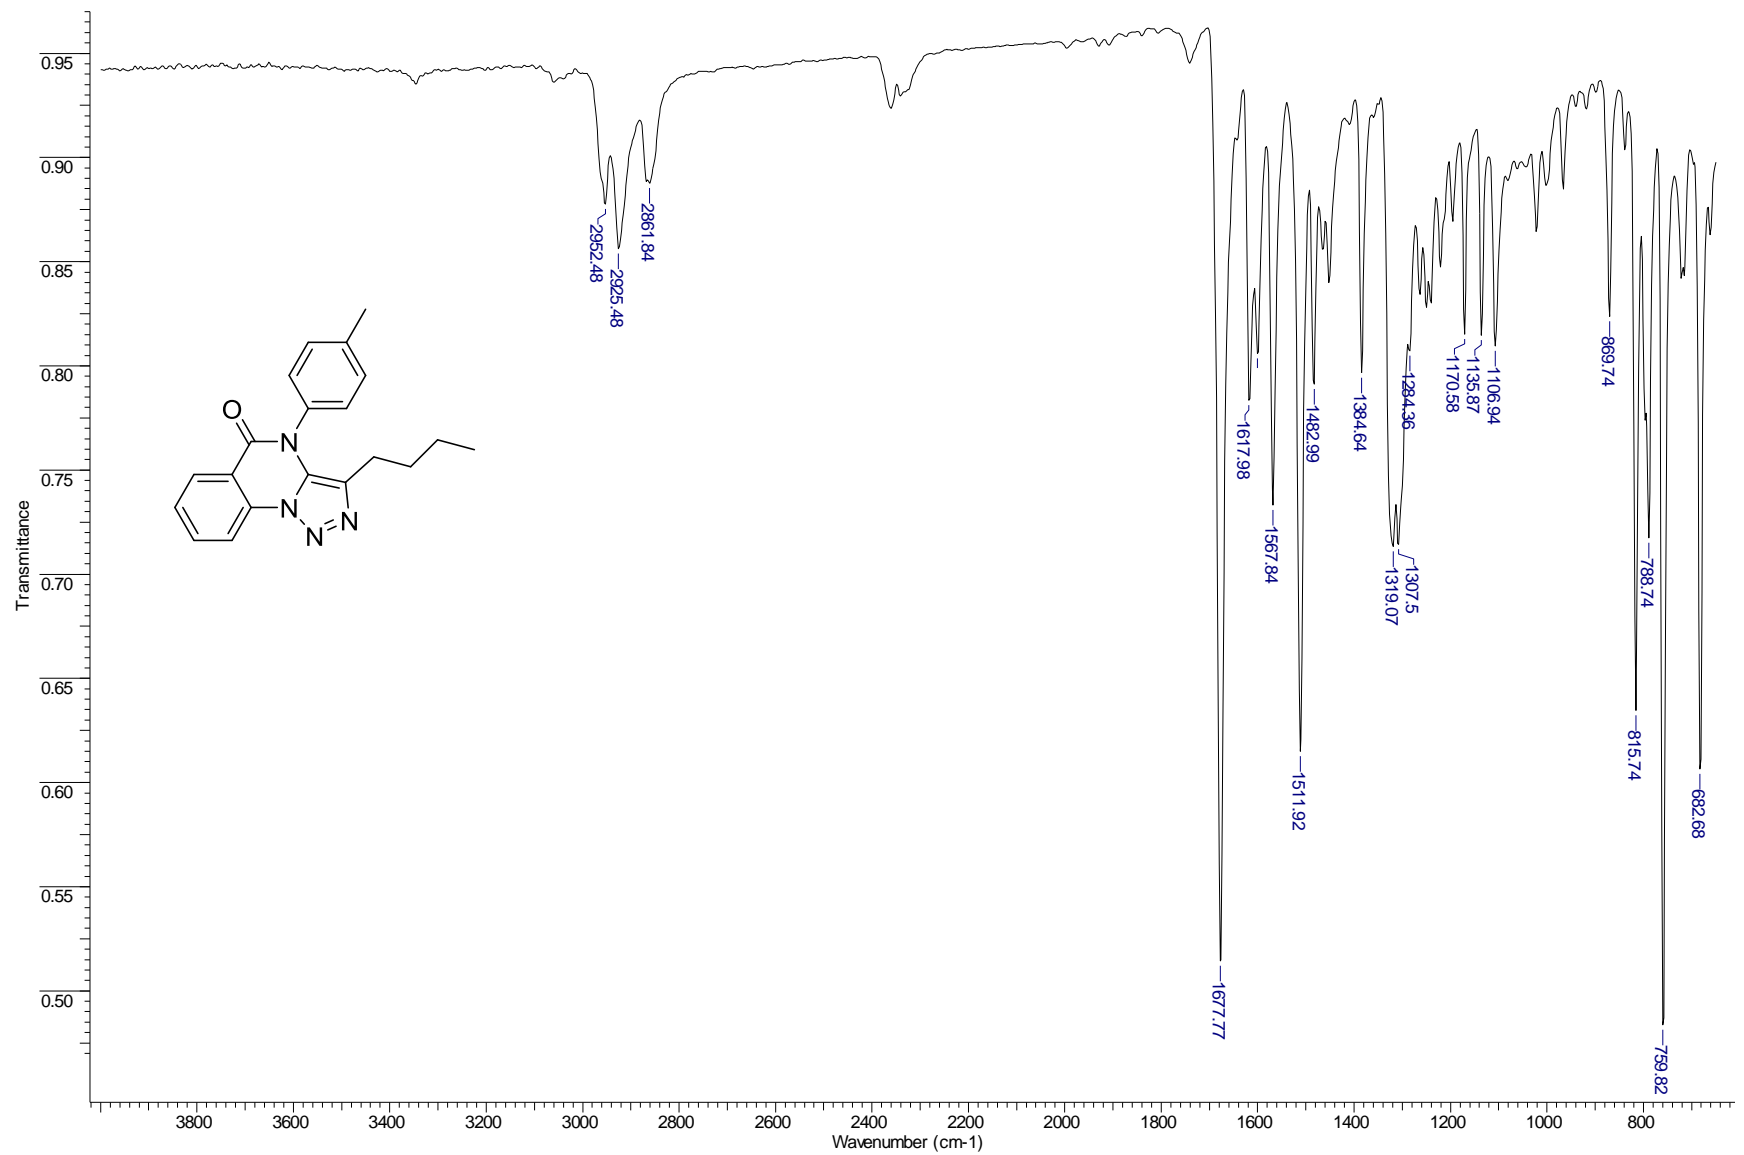

3-Butyl-4-(2-furylmethyl)[1,2,3]triazolo[1,5-a]quinazolin-5(4H)-one (2w)

IR (KBr)

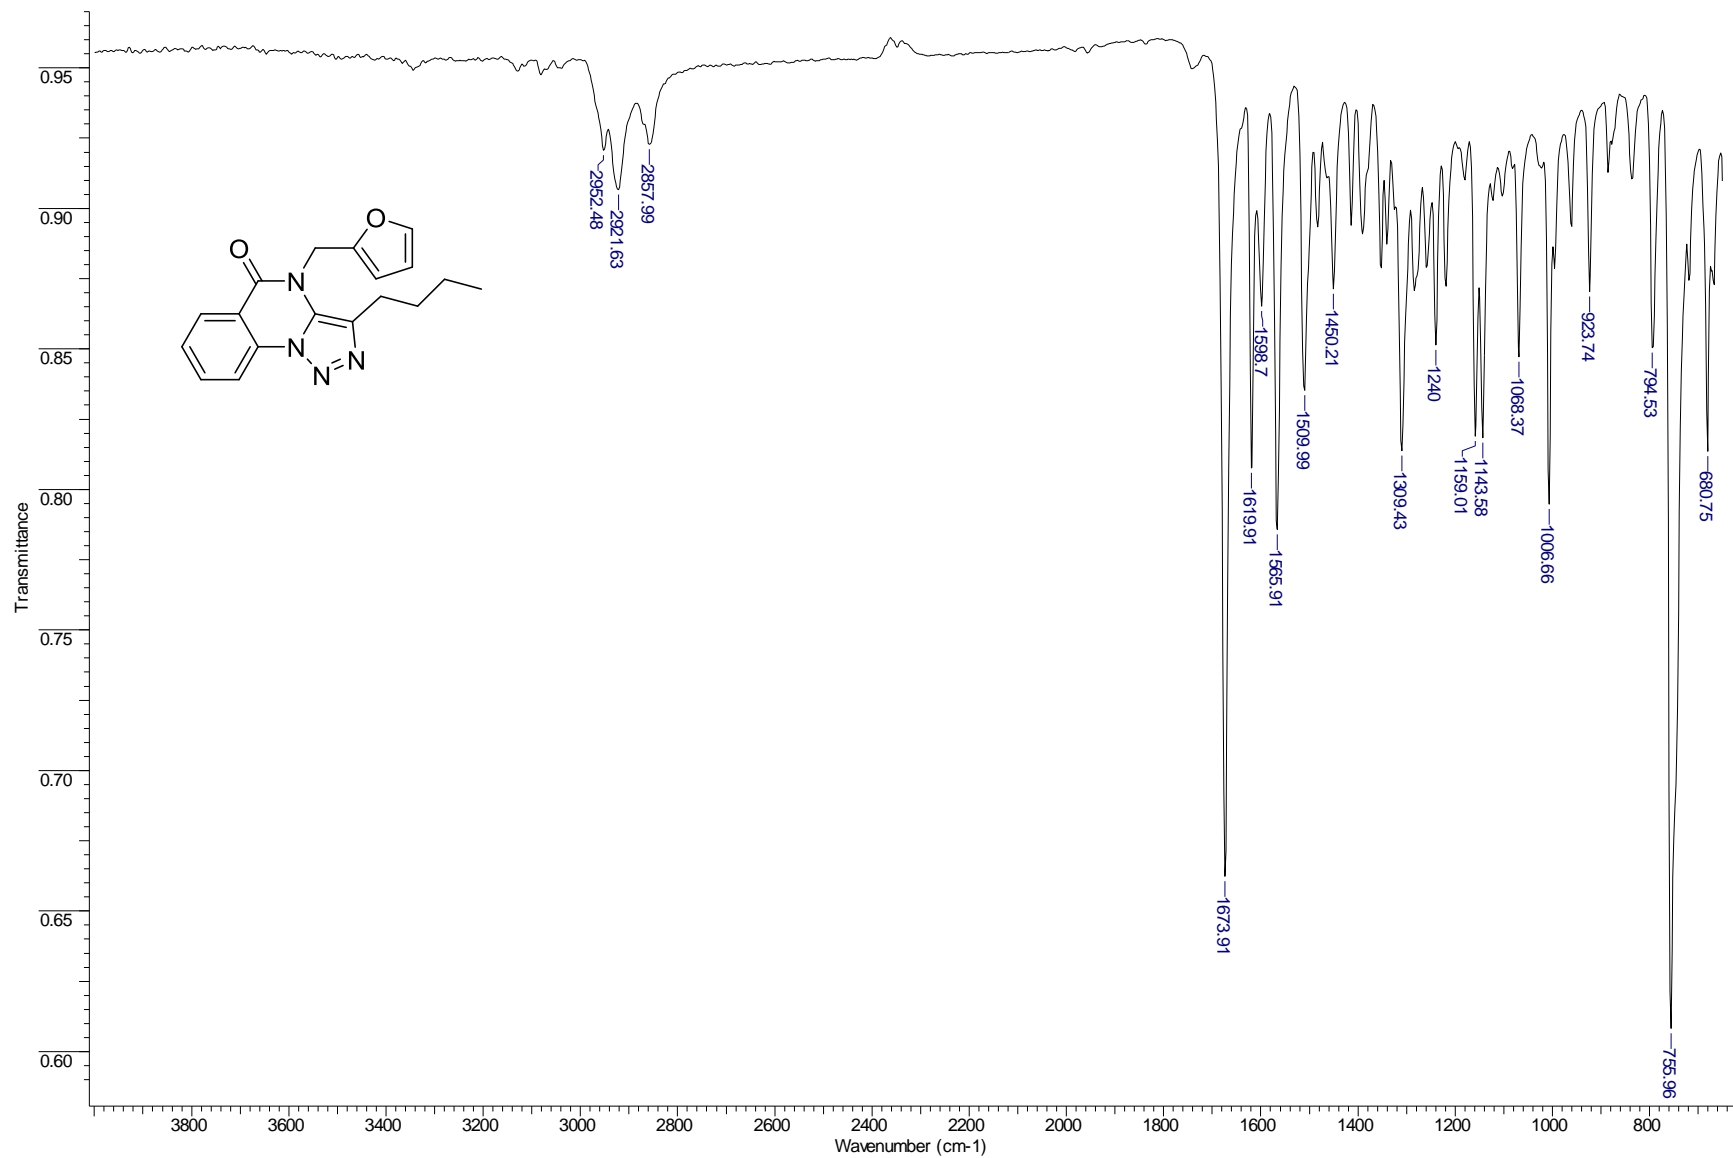

3-Butyl-N-methyl-5H-[1,2,3]triazolo[1,5-a][3,1]benzoxazin-5-imine (3a)

IR (KBr)

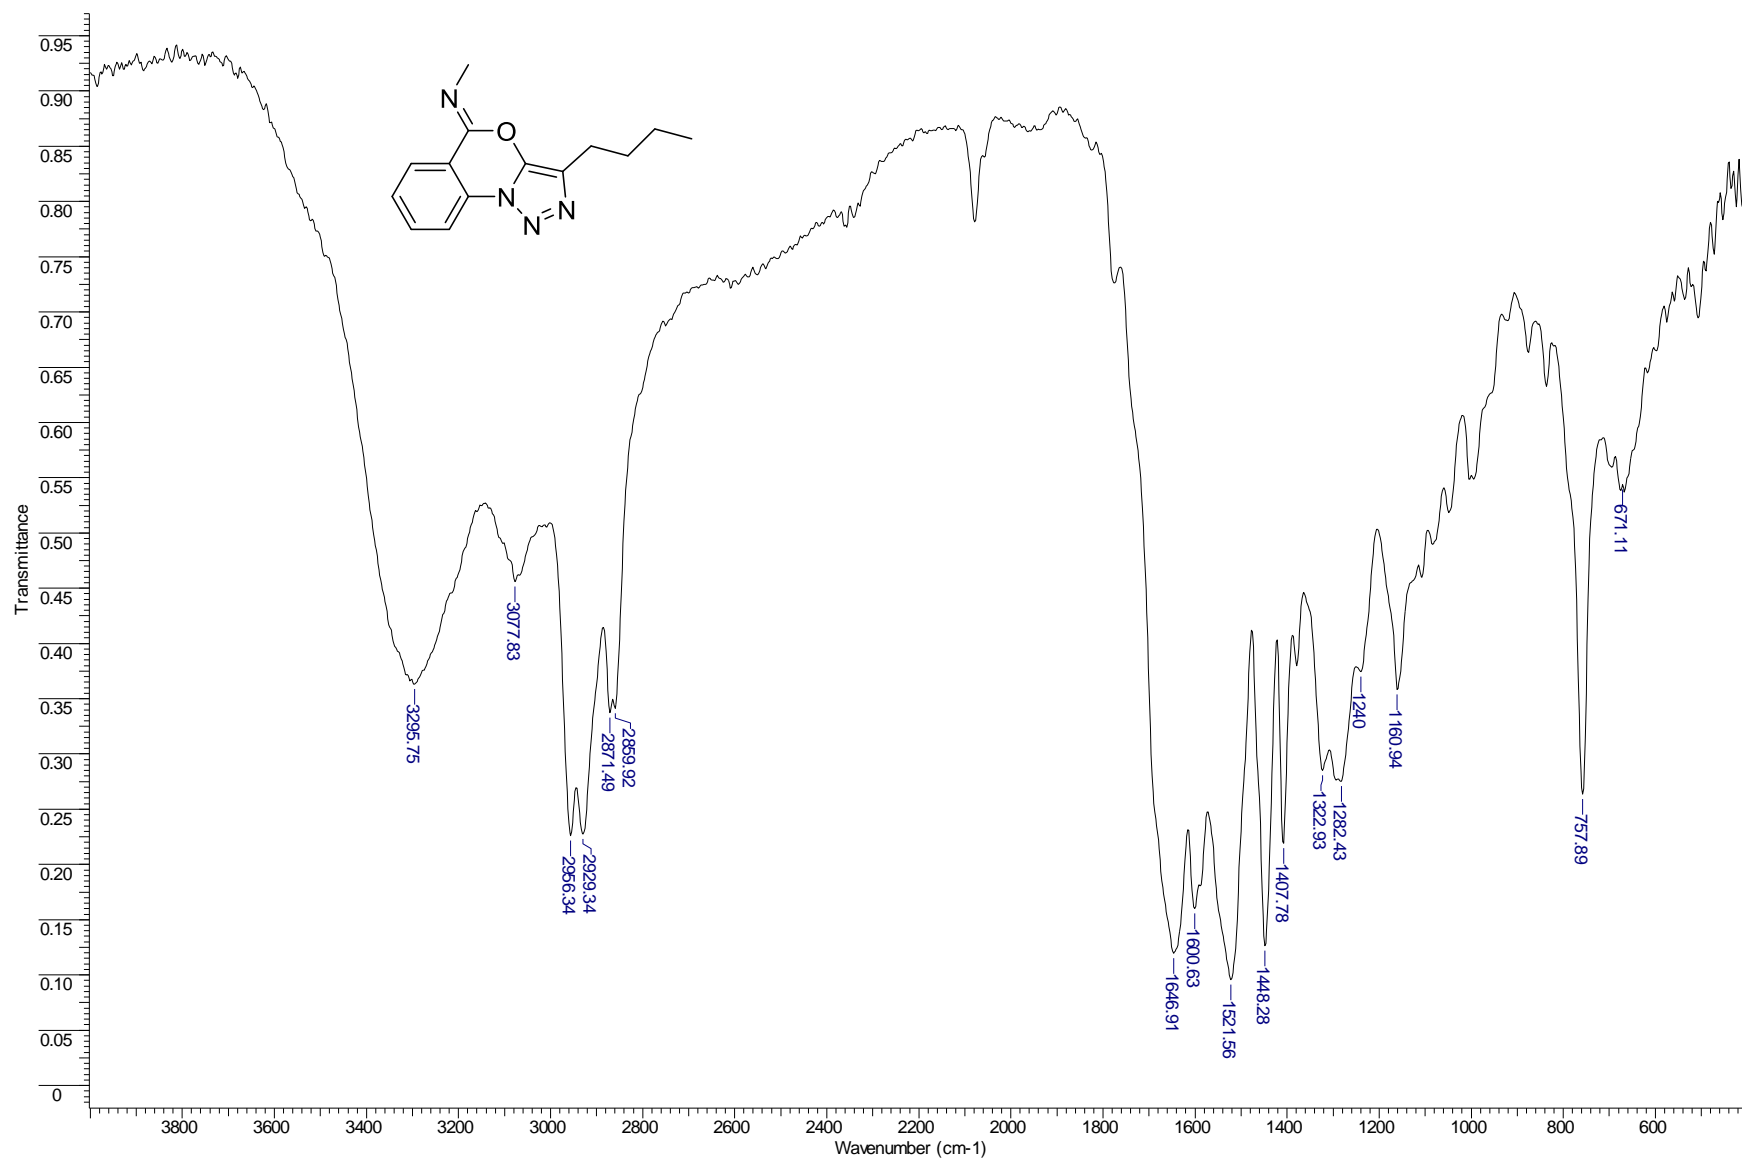

# Copies of NMR spectra

## 2-Azido-*N*-methylbenzamide (S2a)

$^1\text{H}$  NMR (400 MHz,  $\text{CDCl}_3$ )

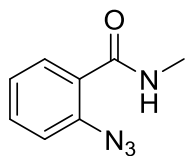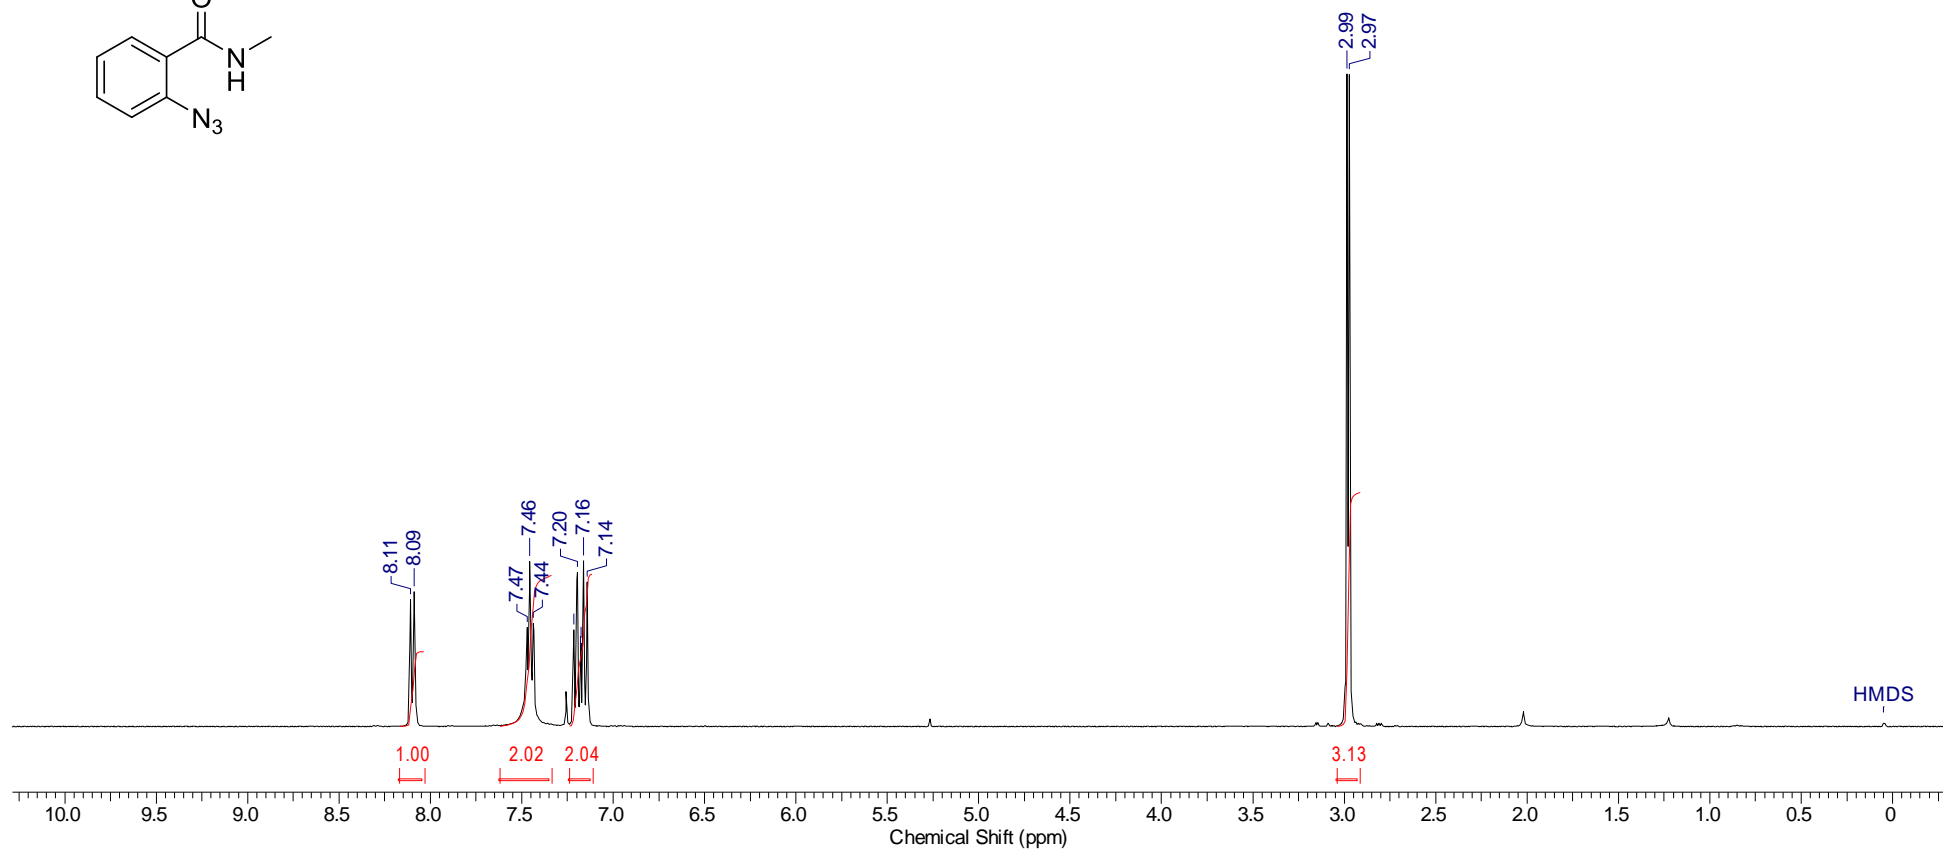

## 2-Azido-*N*-methylbenzamide (S2a)

$^{13}\text{C}\{^1\text{H}\}$  NMR (100 MHz,  $\text{CDCl}_3$ )

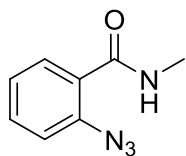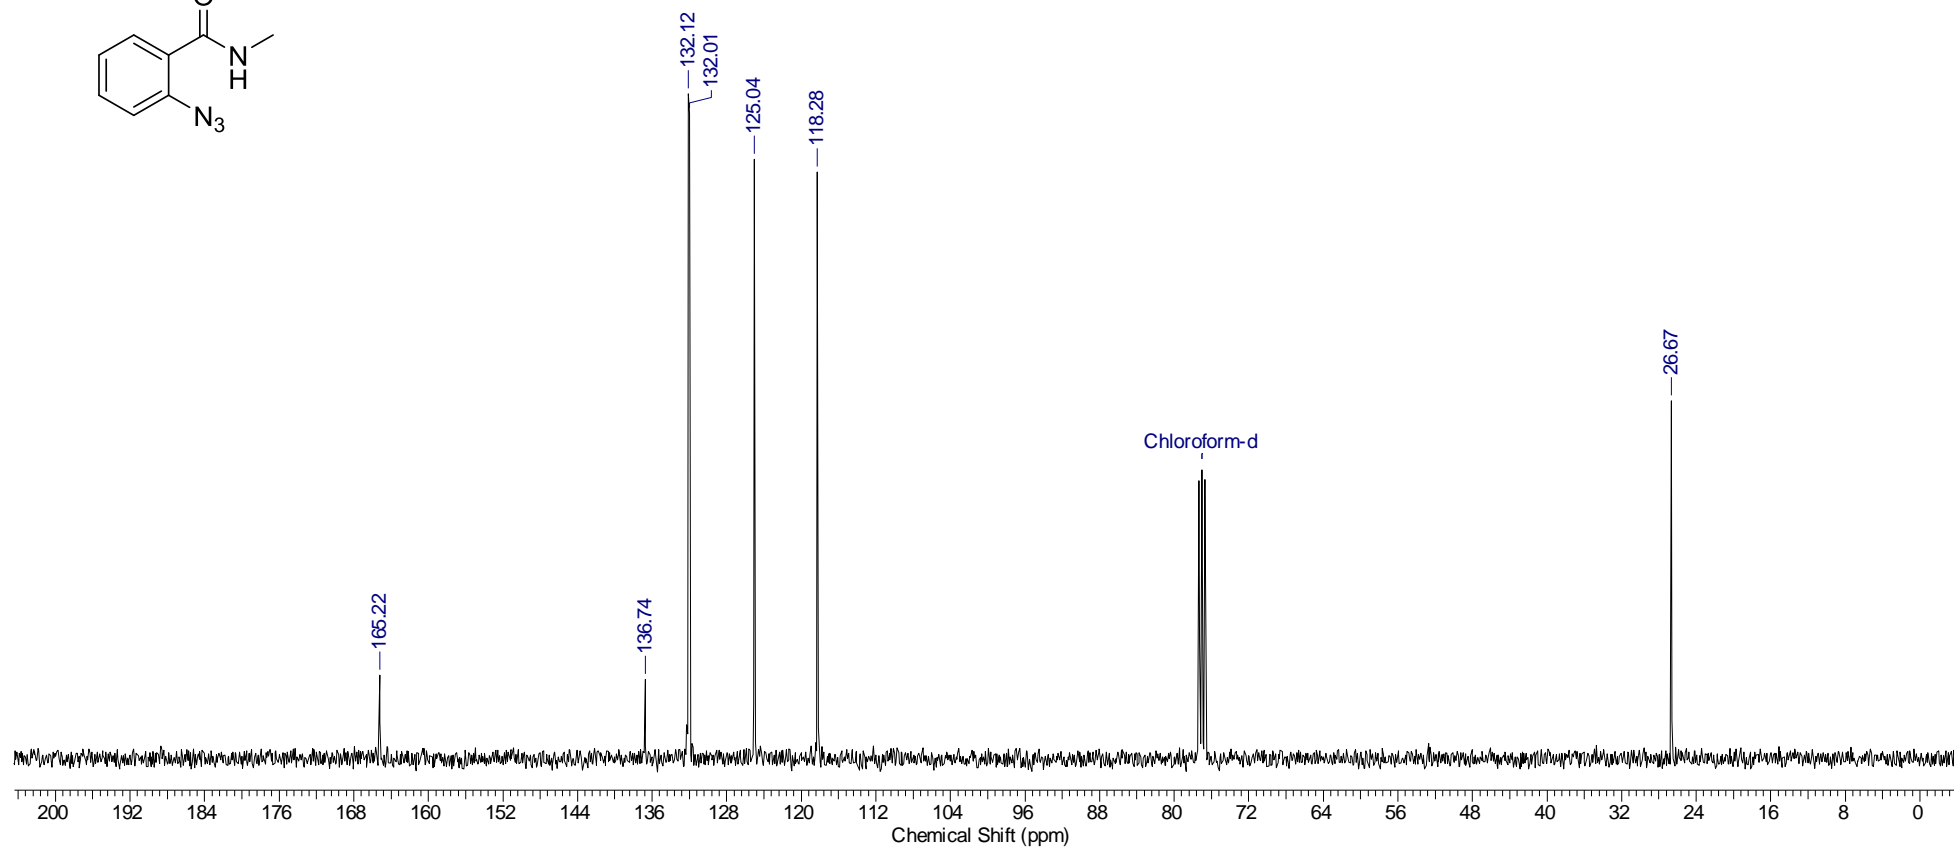



2-Azido-5-bromo-N-methylbenzamide (S2b)

$^1\text{H NMR}$  (400 MHz,  $\text{CDCl}_3$ )

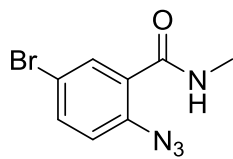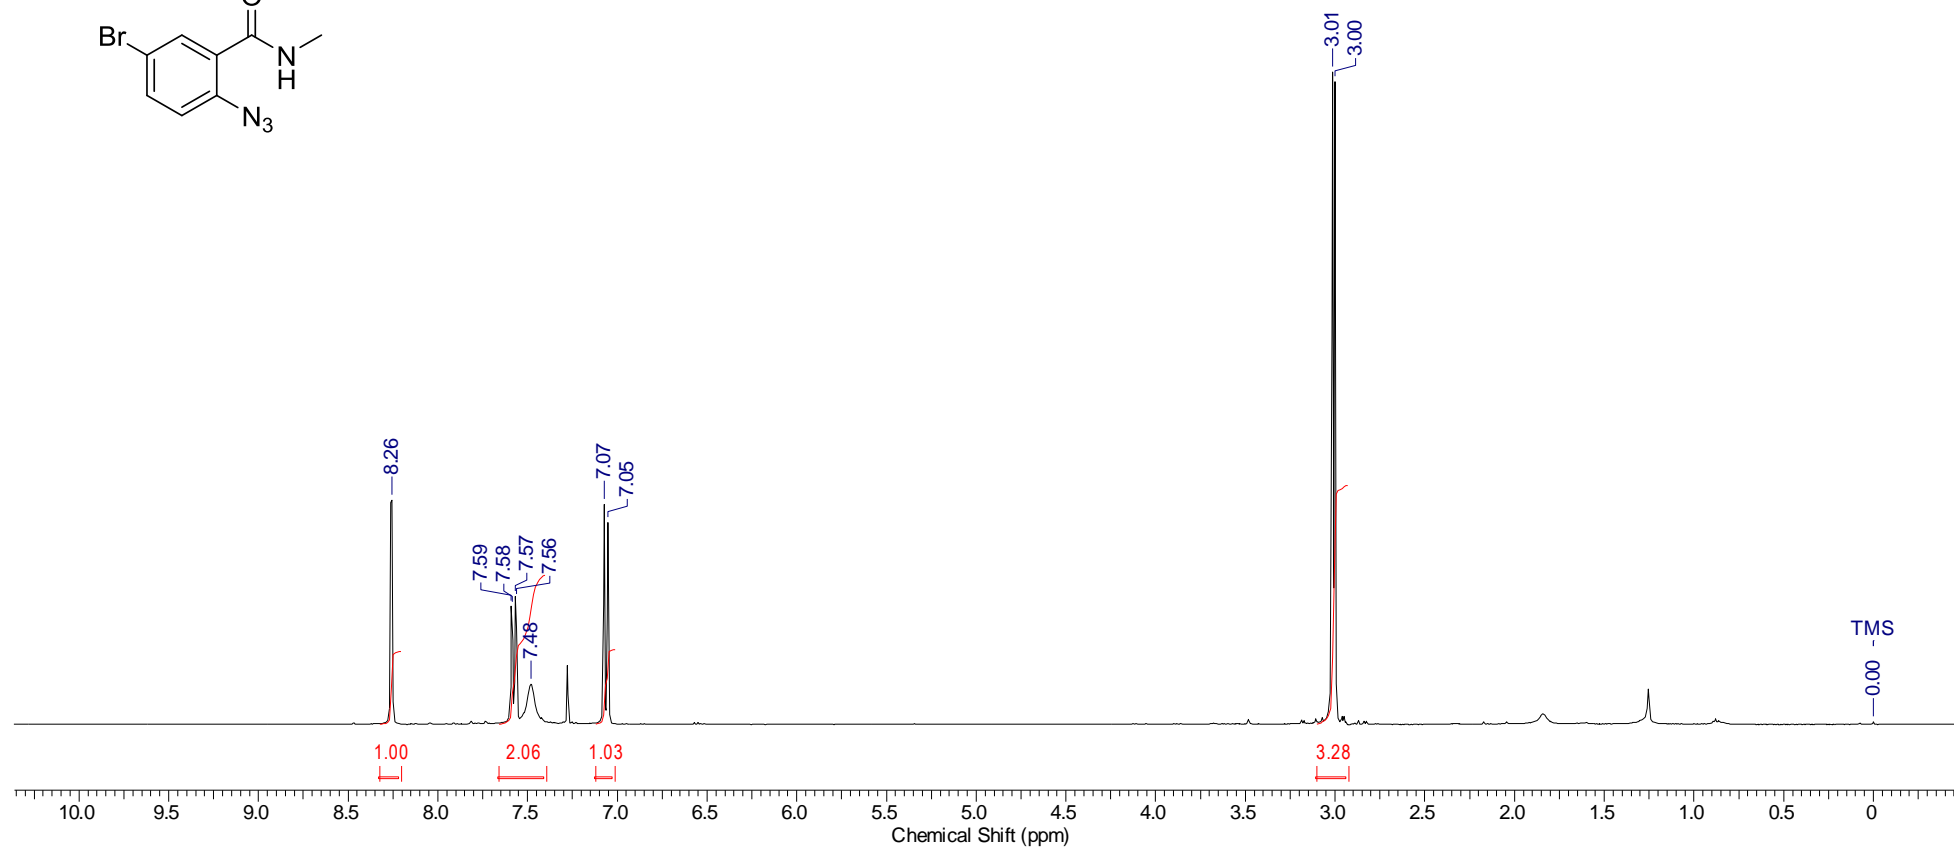

2-Azido-5-bromo-N-methylbenzamide (S2b)

$^{13}\text{C}\{^1\text{H}\}$  NMR (100 MHz,  $\text{CDCl}_3$ )

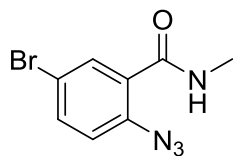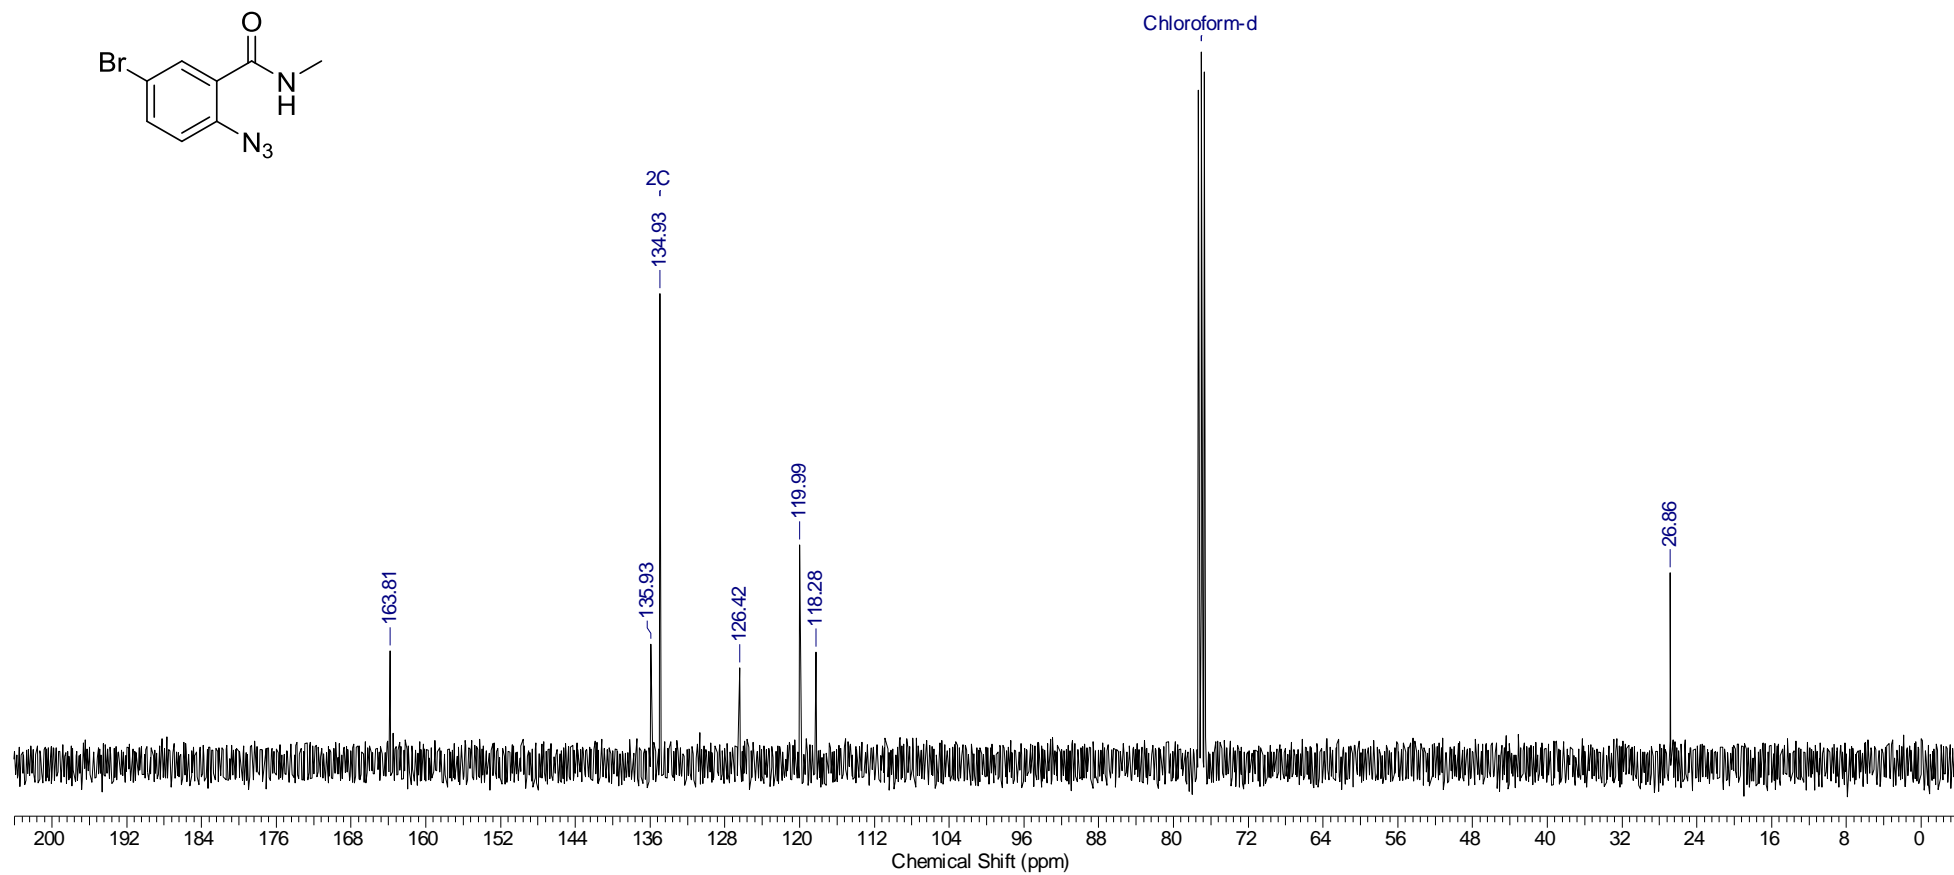

2-Azido-5-iodo-*N*-methylbenzamide (S2c)

$^1\text{H}$  NMR (400 MHz,  $\text{CDCl}_3$ )

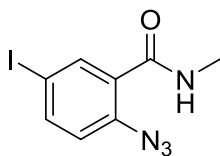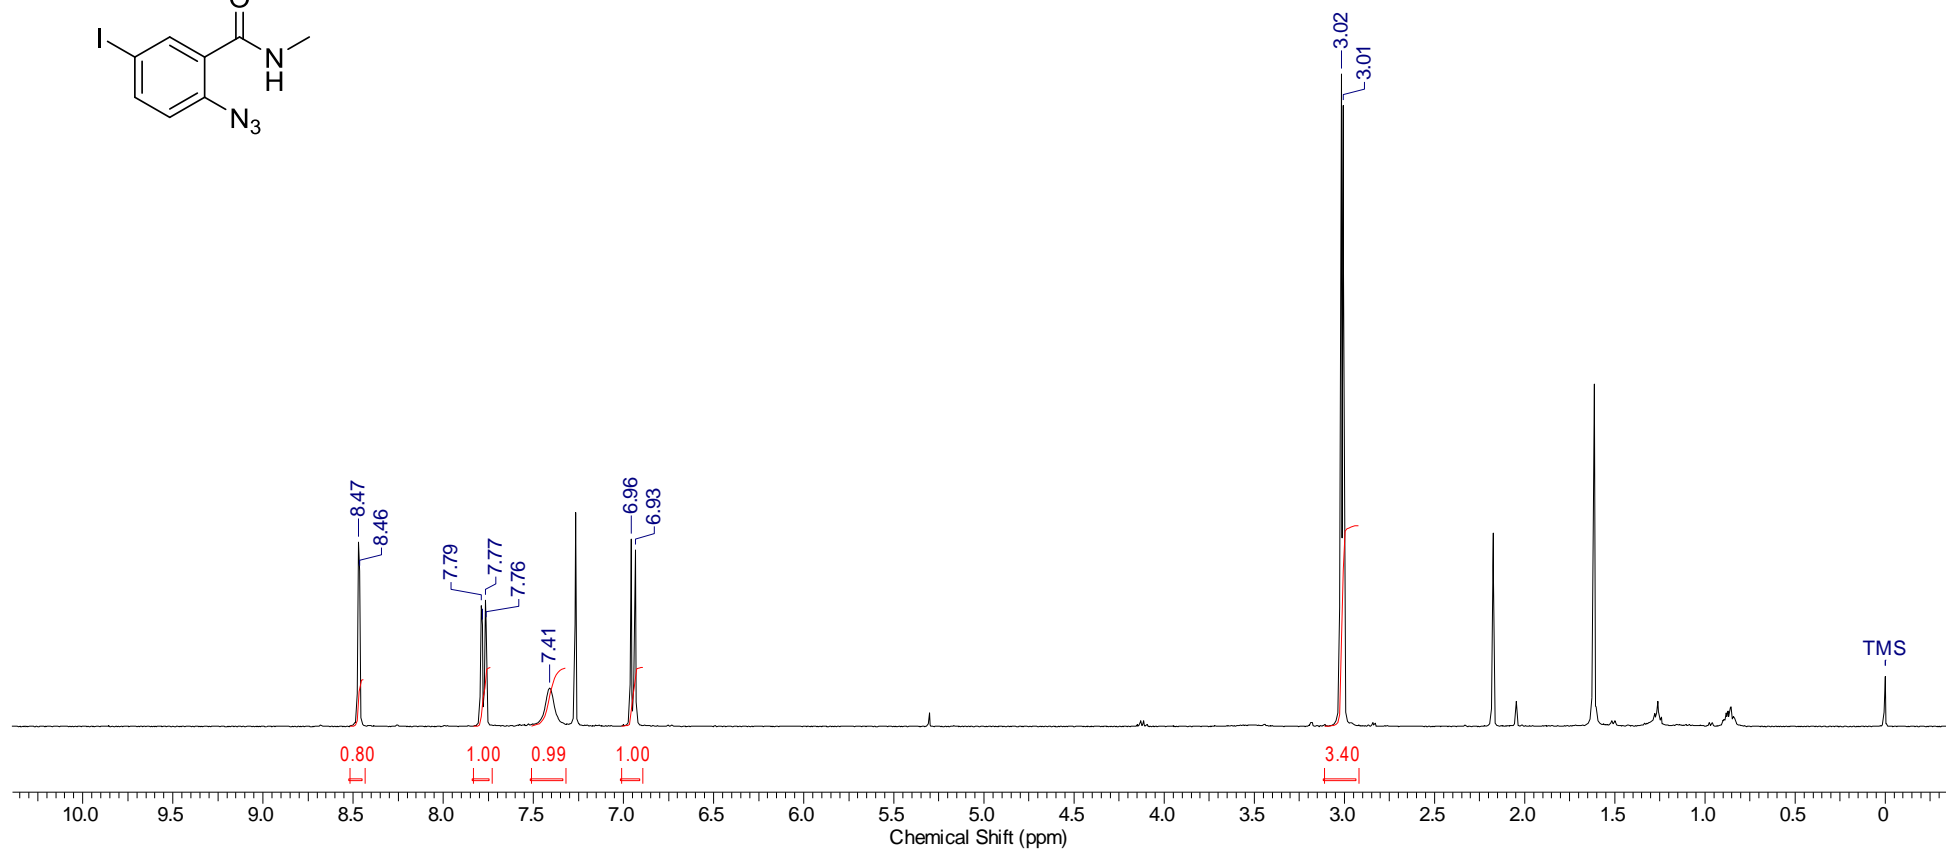

**2-Azido-5-iodo-N-methylbenzamide (S2c)**

$^{13}\text{C}\{^1\text{H}\}$  NMR (100 MHz,  $\text{CDCl}_3$ )

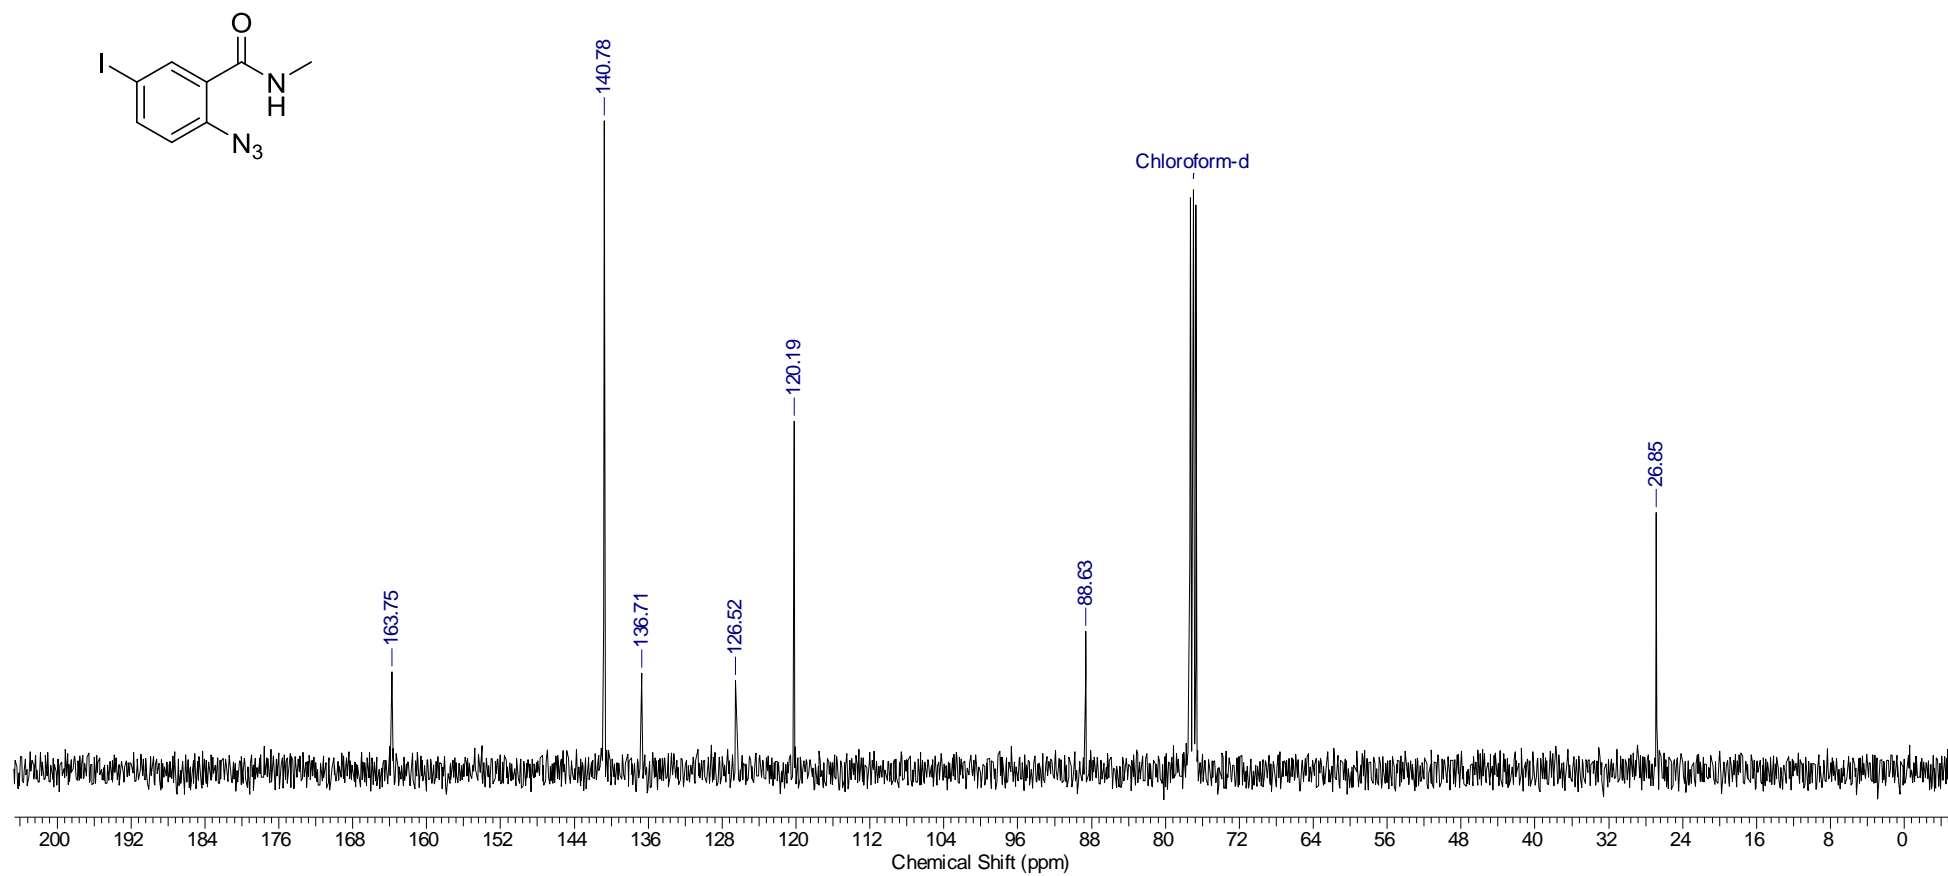

2-Azido-4-methoxy-N-methylbenzamide (S2d)

$^1\text{H NMR}$  (400 MHz,  $\text{CDCl}_3$ )

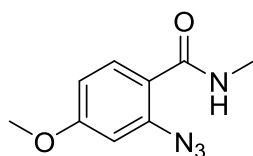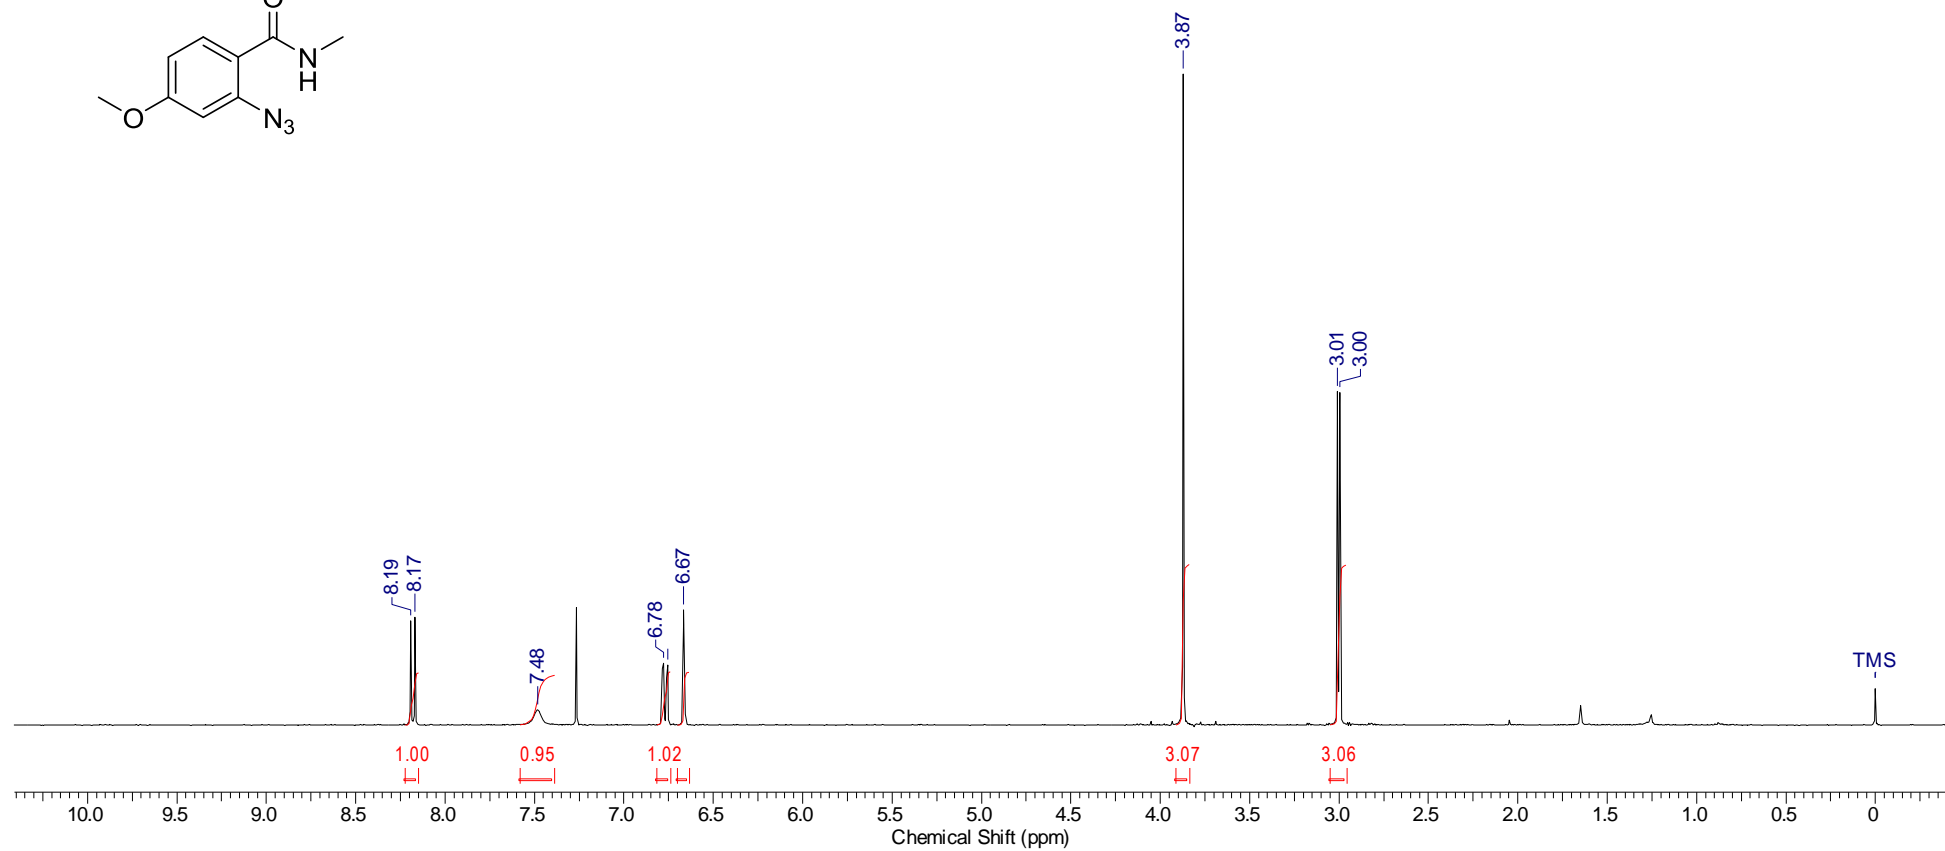

2-Azido-4-methoxy-N-methylbenzamide (S2d)

$^{13}\text{C}\{^1\text{H}\}$  NMR (100 MHz,  $\text{CDCl}_3$ )

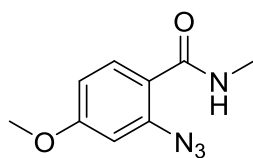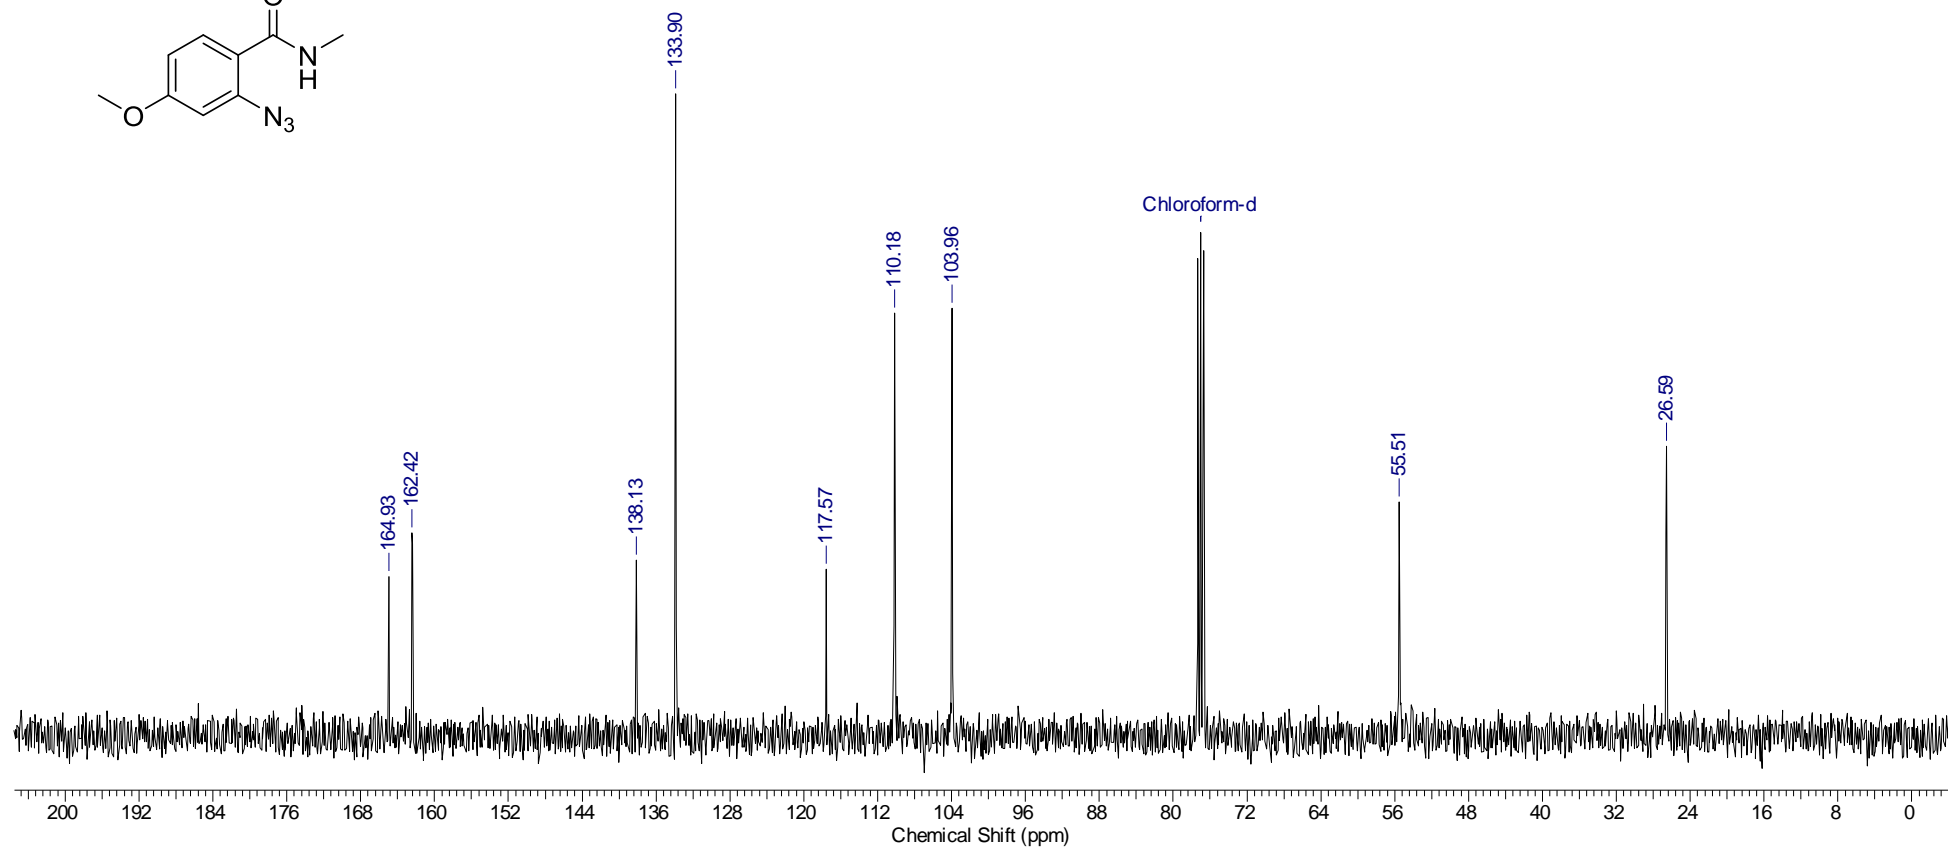

2-Azido-*N*,6-dimethylbenzamide (S2e)

<sup>1</sup>H NMR (400 MHz, CDCl<sub>3</sub>)

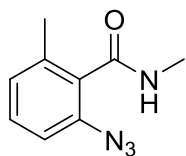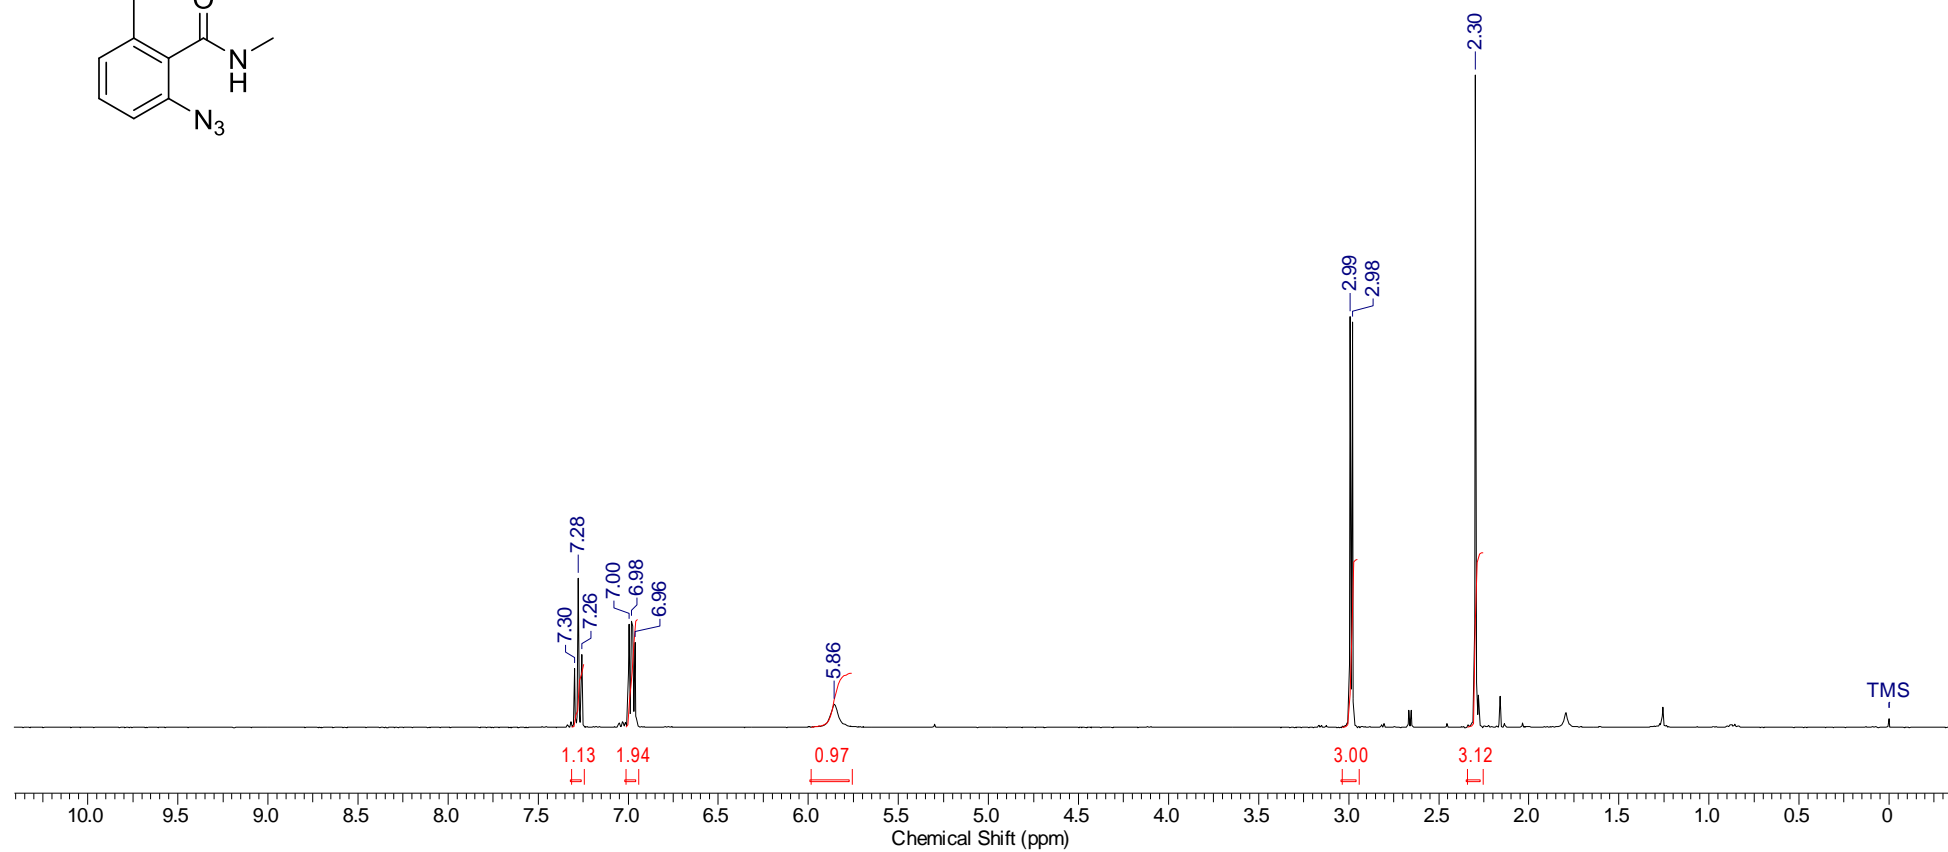

2-Azido-*N*,6-dimethylbenzamide (S2e)

$^{13}\text{C}\{^1\text{H}\}$  NMR (100 MHz,  $\text{CDCl}_3$ )

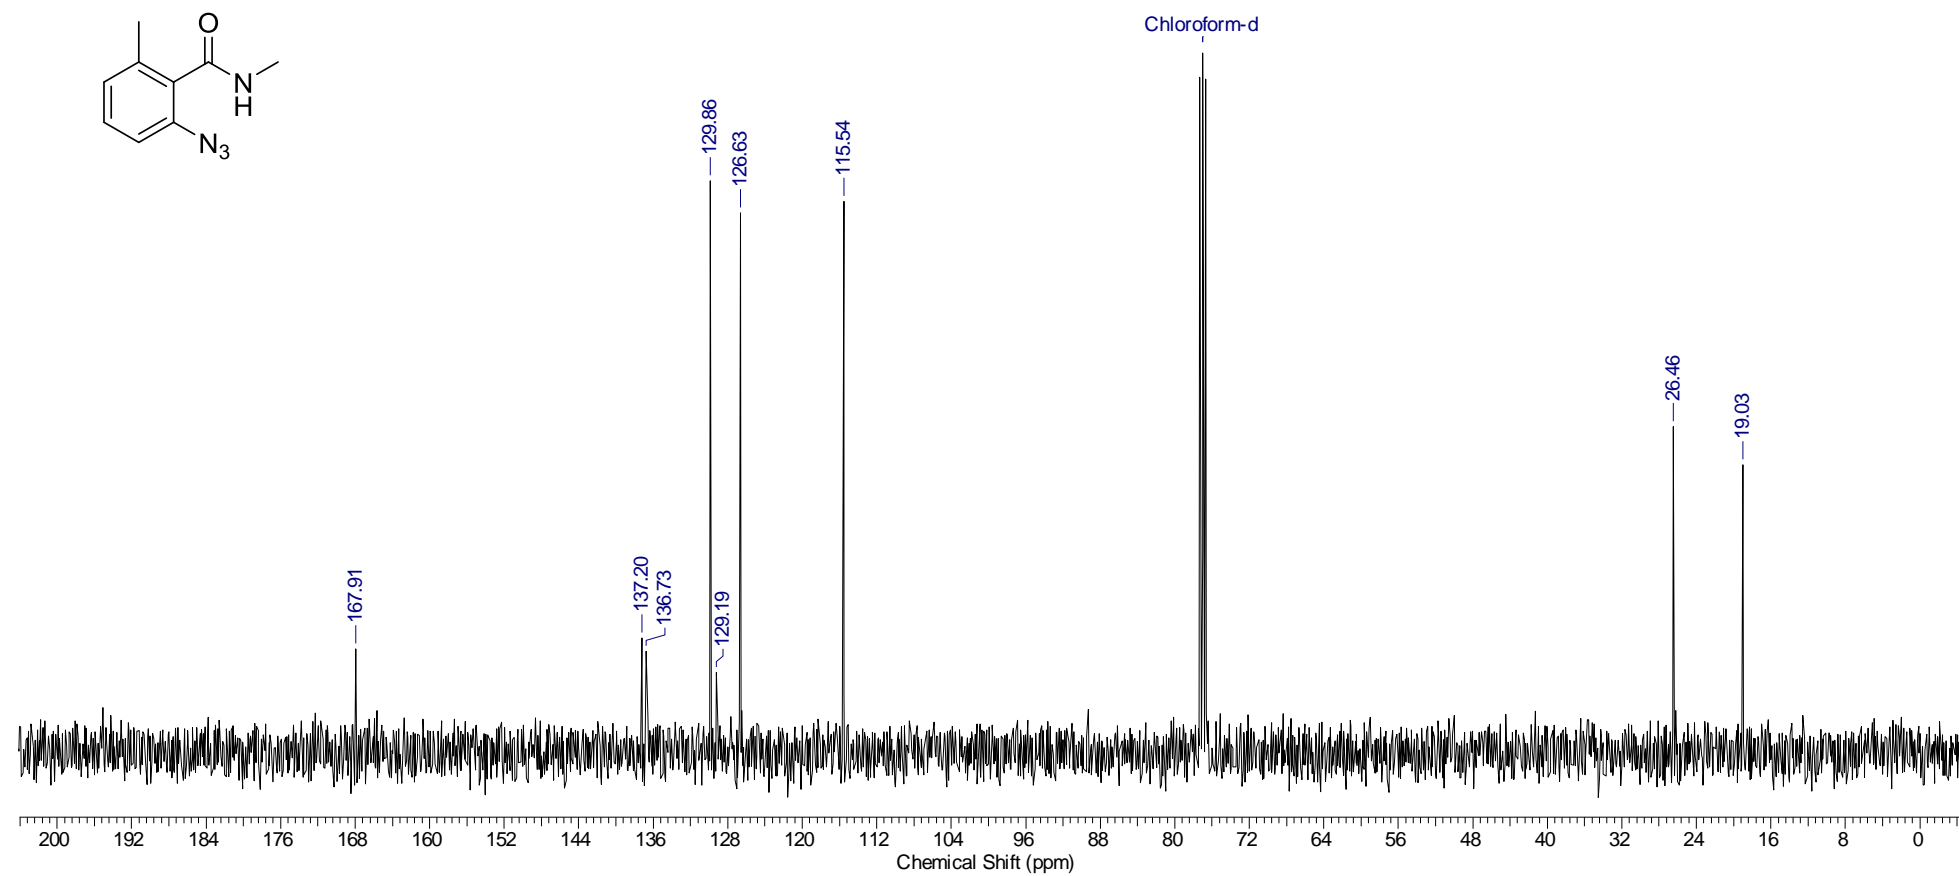



2-Azido-*N*,3-dimethylbenzamide (S2f)

<sup>1</sup>H NMR (400 MHz, CDCl<sub>3</sub>)

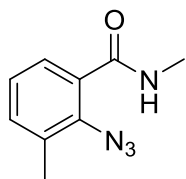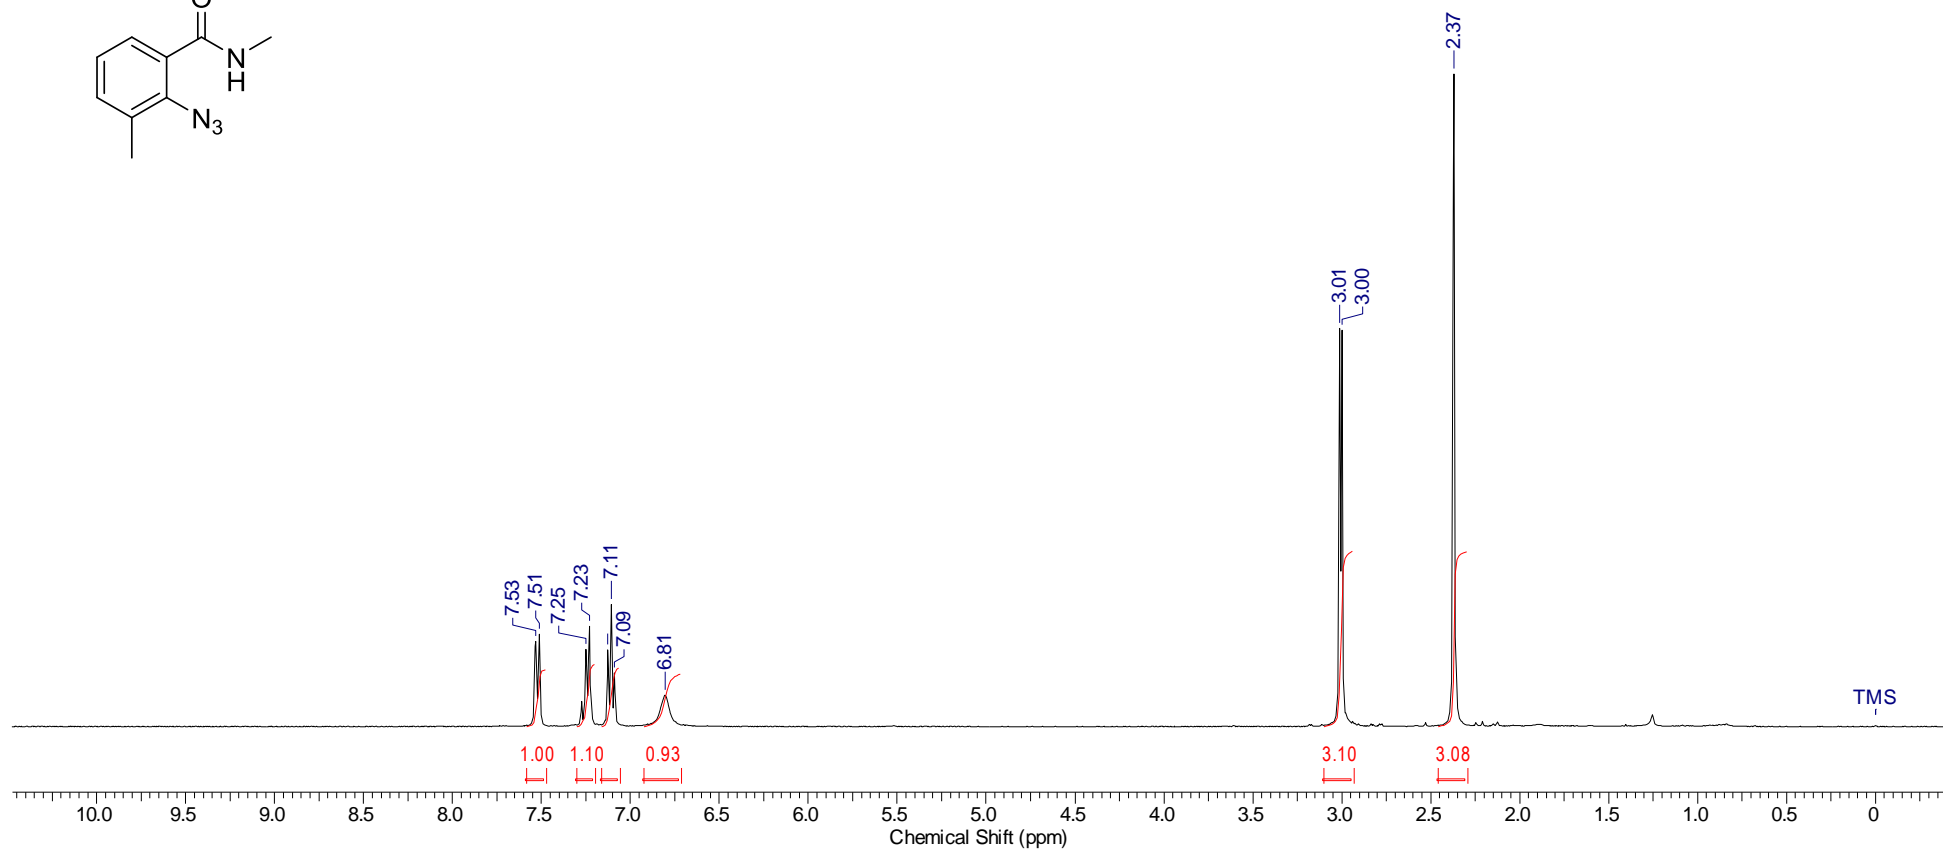

2-Azido-*N*,3-dimethylbenzamide (S2f)

$^{13}\text{C}\{^1\text{H}\}$  NMR (100 MHz,  $\text{CDCl}_3$ )

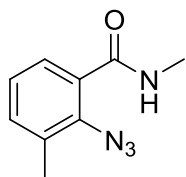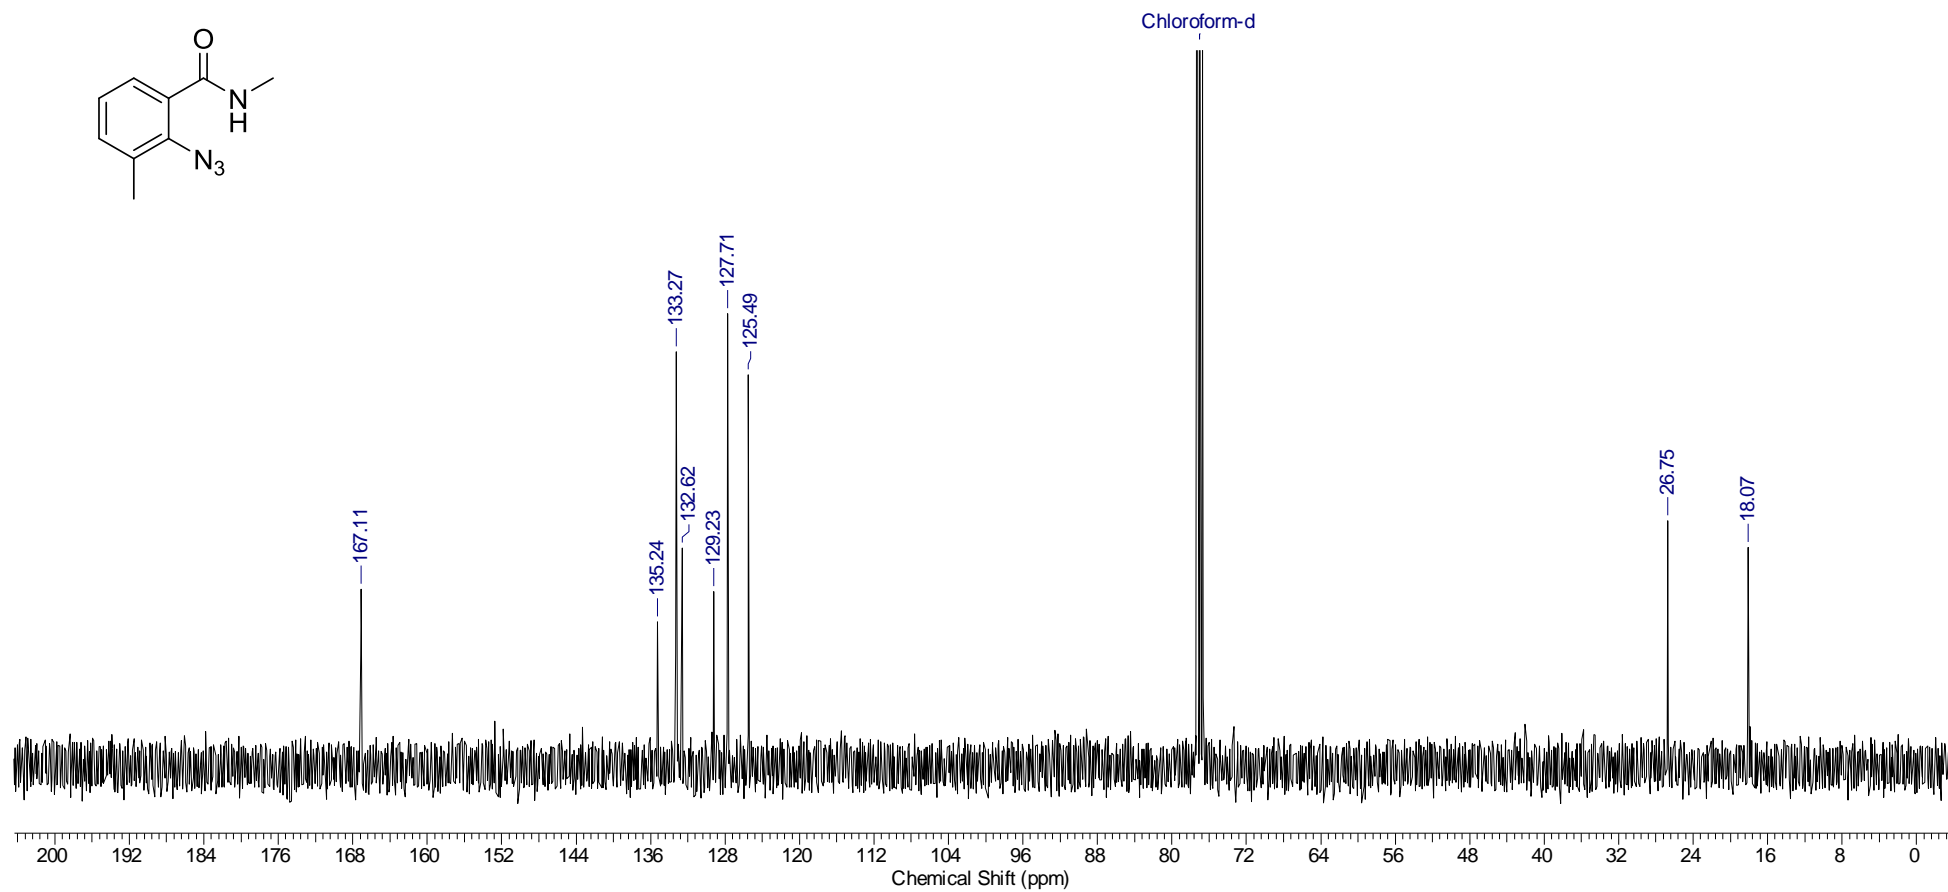

2-(4-Butyl-5-iodo-1H-1,2,3-triazol-1-yl)-N-methylbenzamide (1a)

<sup>1</sup>H NMR (400 MHz, CDCl<sub>3</sub>)

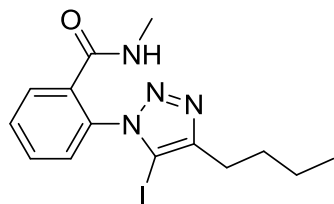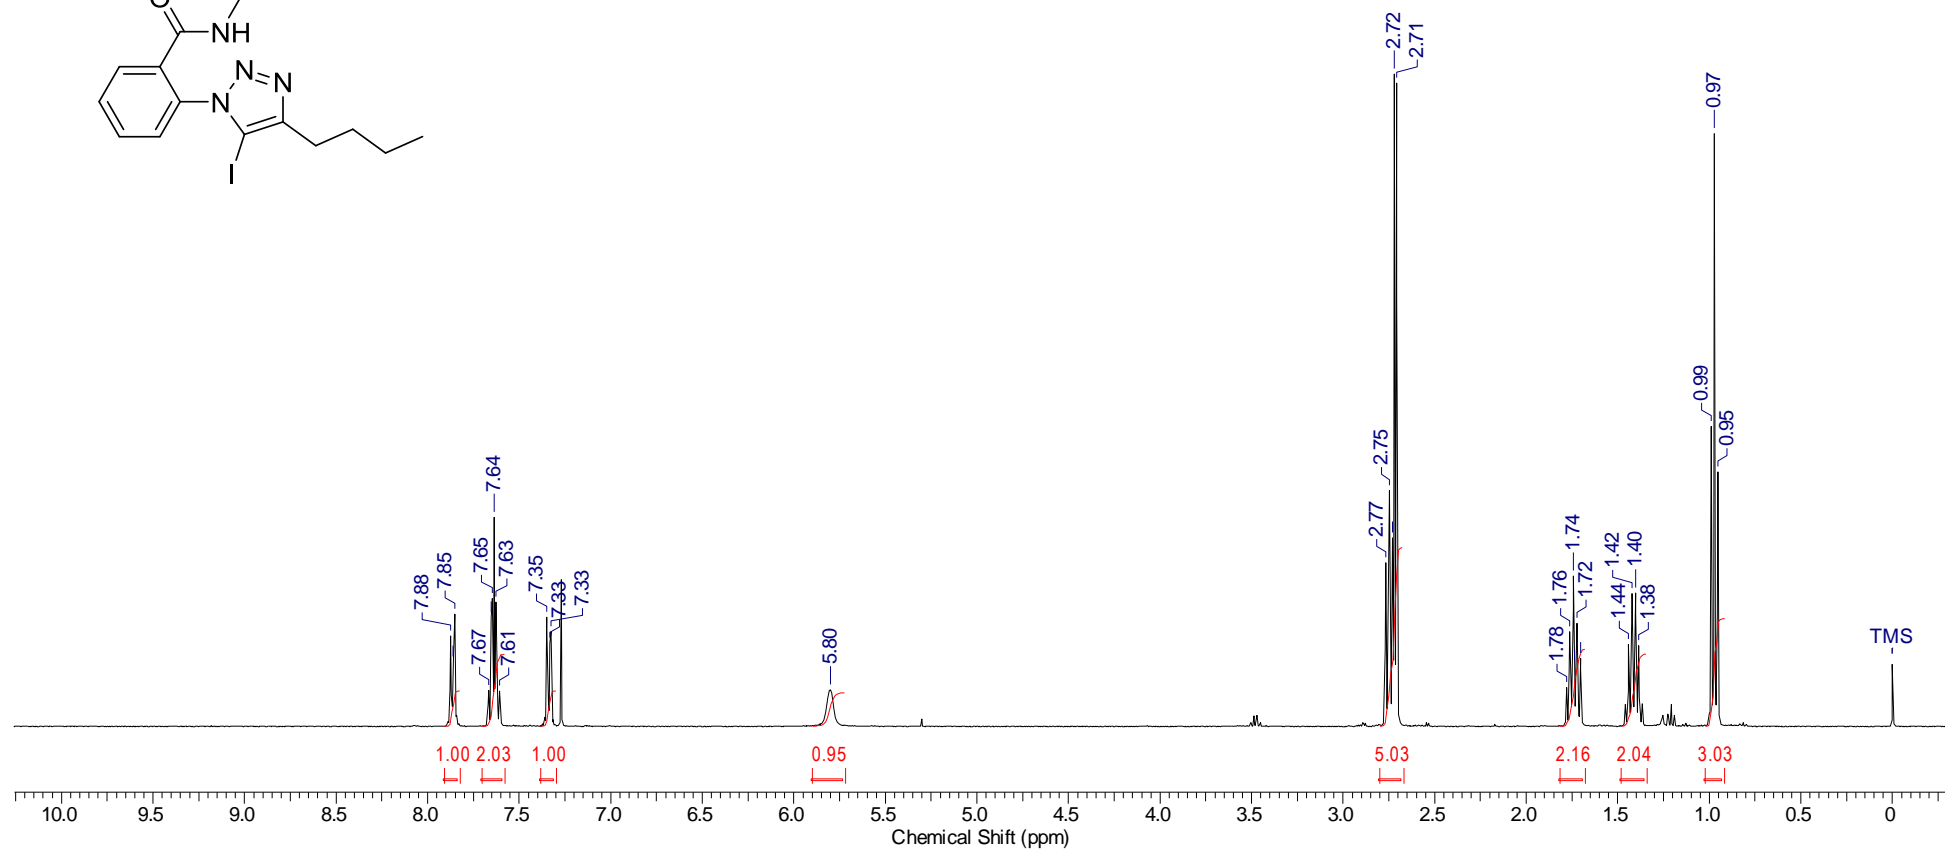

2-(4-Butyl-5-iodo-1*H*-1,2,3-triazol-1-yl)-*N*-methylbenzamide (1a)

$^{13}\text{C}\{^1\text{H}\}$  NMR (100 MHz,  $\text{CDCl}_3$ )

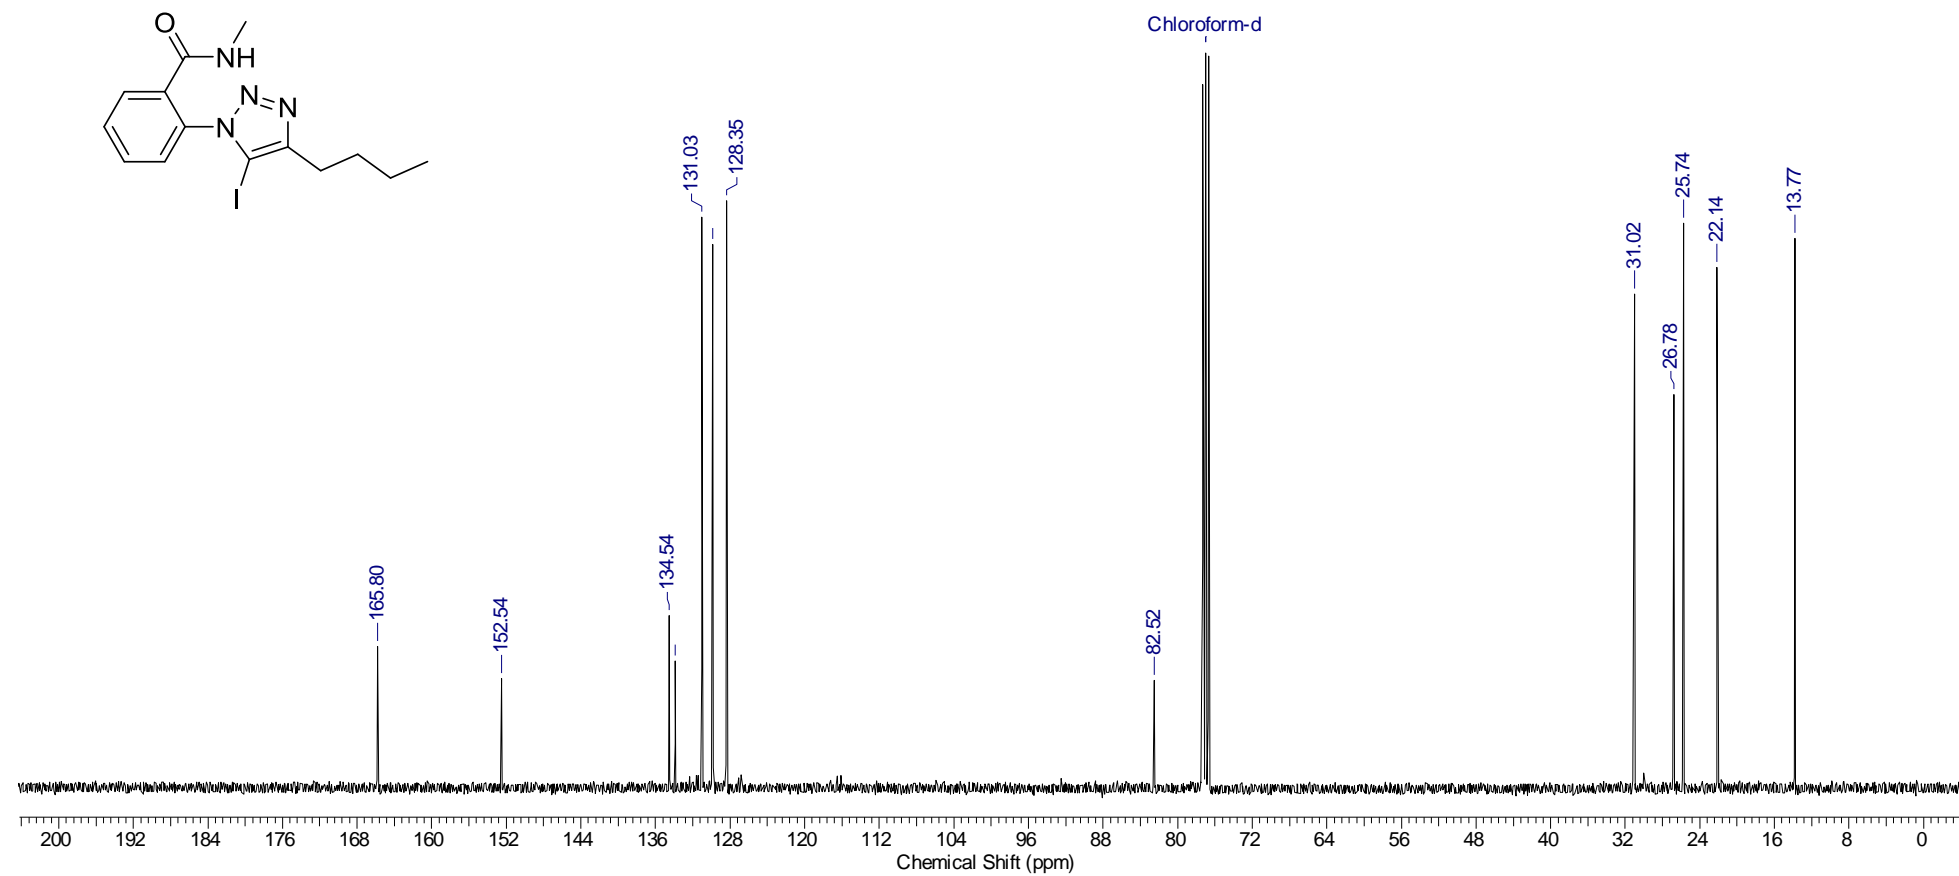

5-Bromo-2-(4-butyl-5-iodo-1H-1,2,3-triazol-1-yl)-N-methylbenzamide (1b)

<sup>1</sup>H NMR (400 MHz, CDCl<sub>3</sub>)

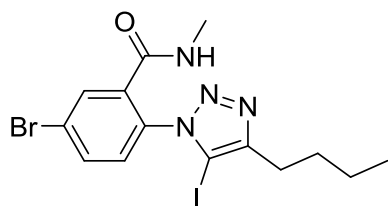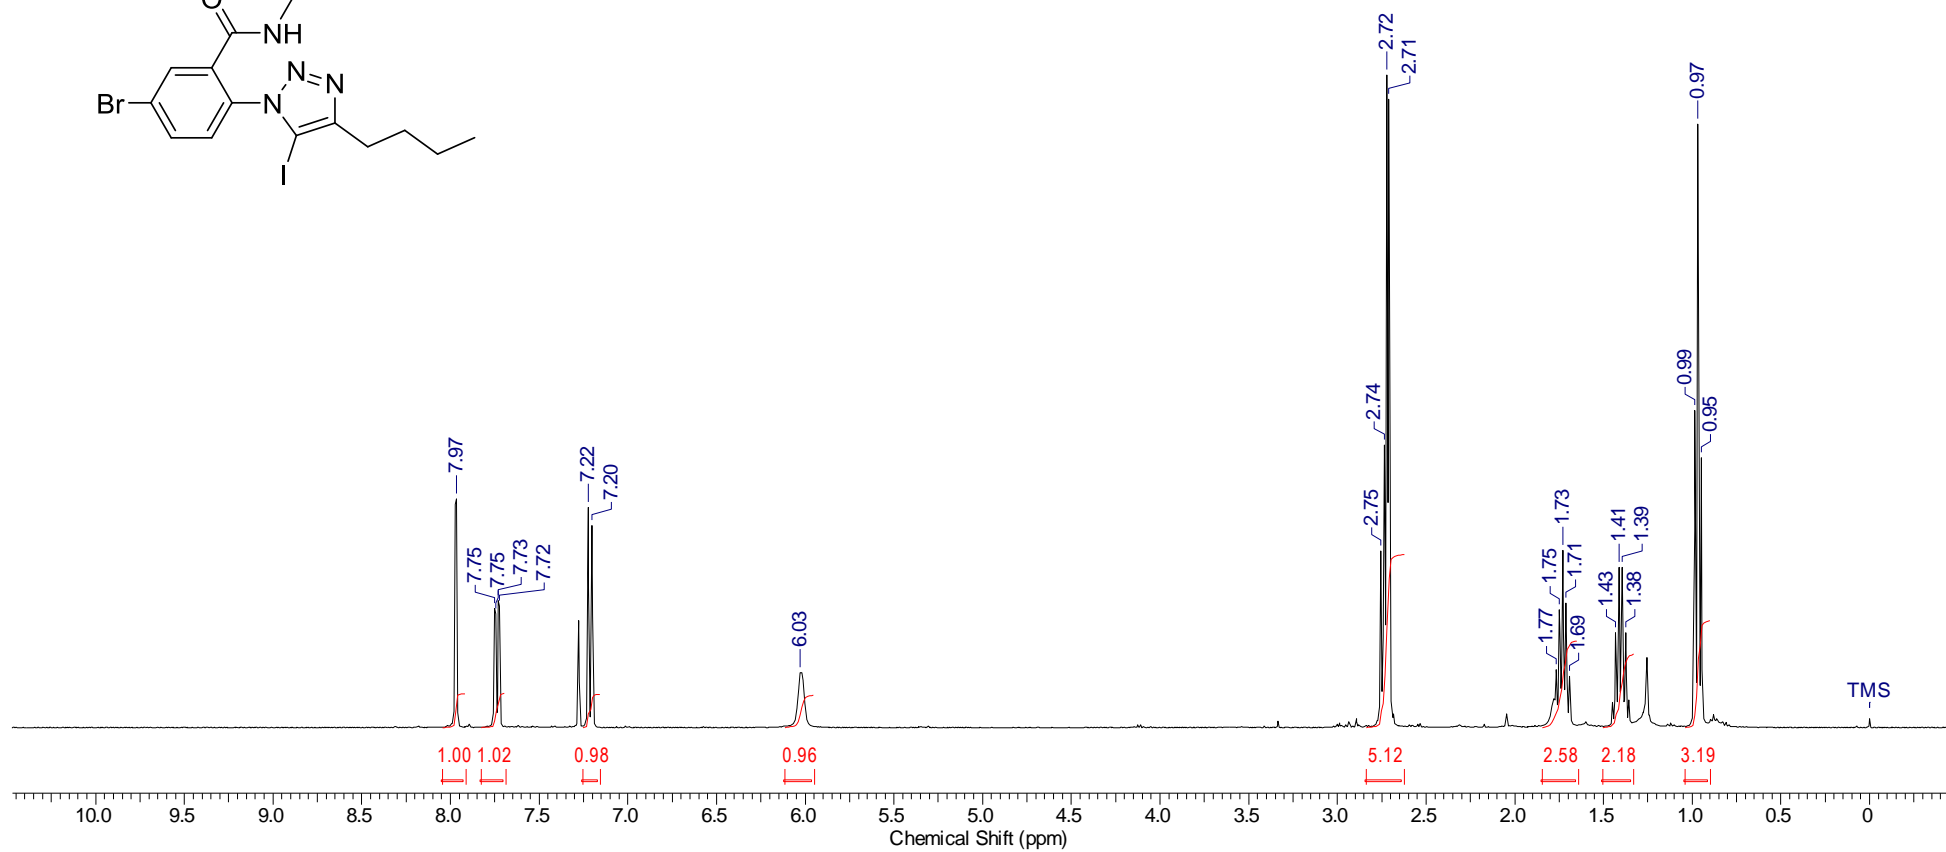

**5-Bromo-2-(4-butyl-5-iodo-1H-1,2,3-triazol-1-yl)-N-methylbenzamide (1b)**

$^{13}\text{C}\{^1\text{H}\}$  NMR (100 MHz,  $\text{CDCl}_3$ )

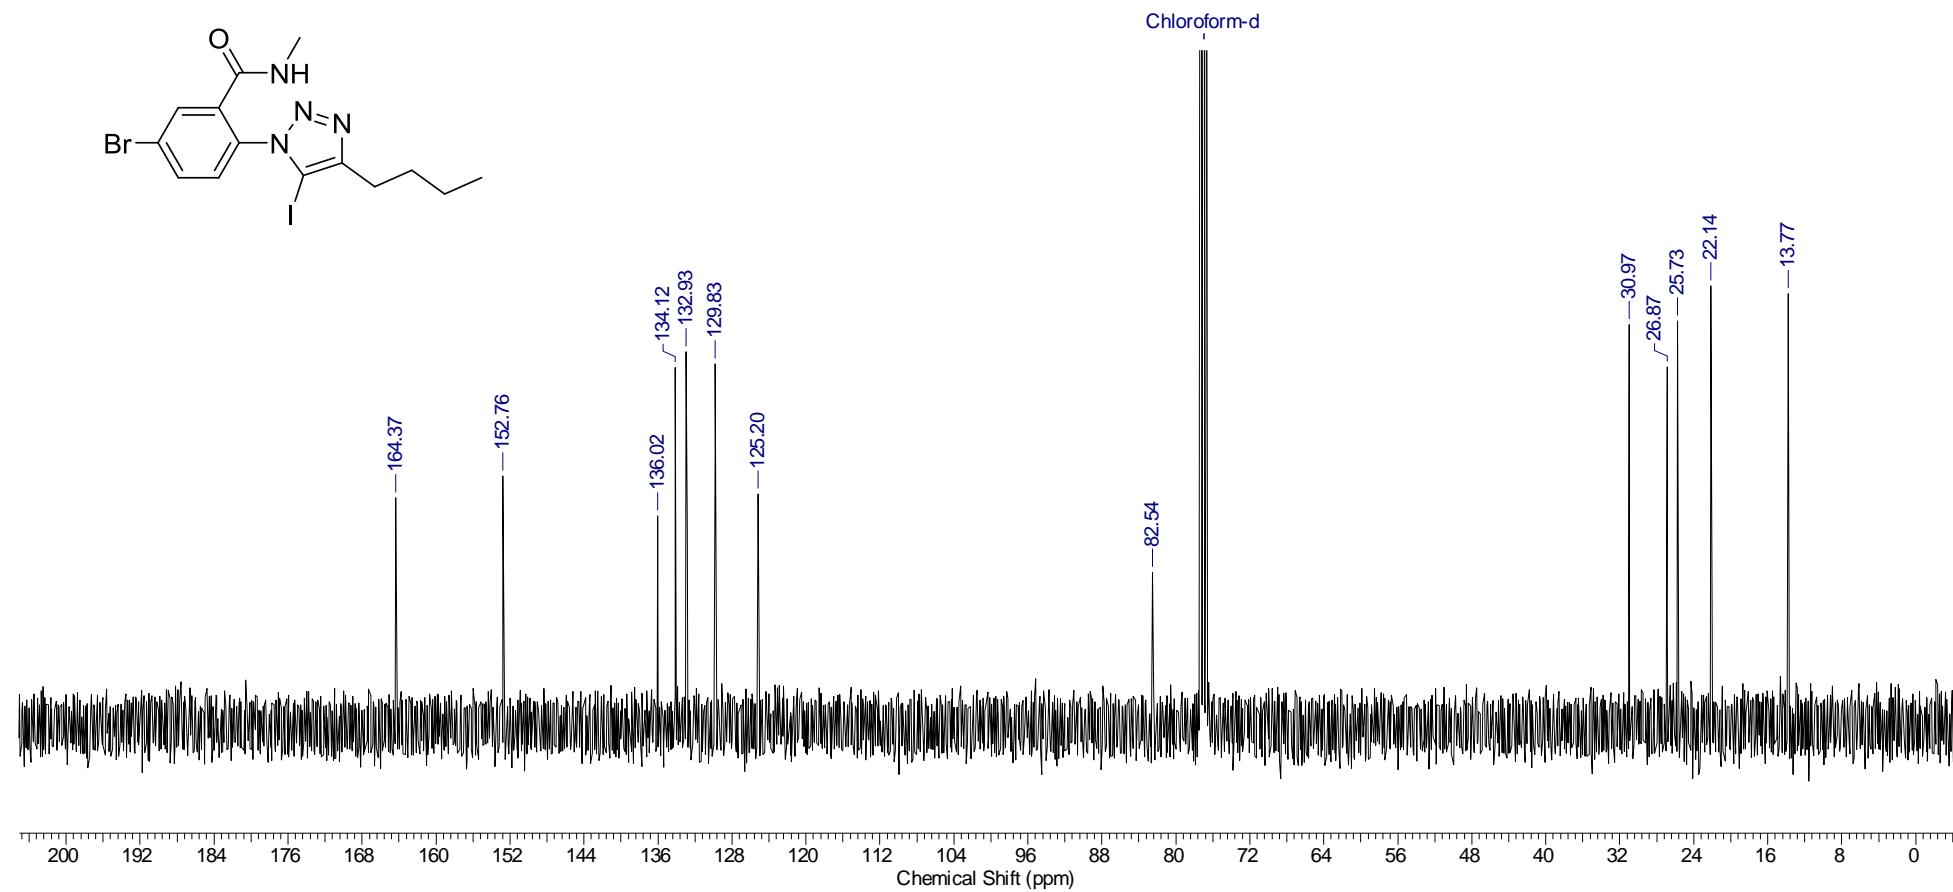

(4-Butyl-5-iodo-1*H*-1,2,3-triazol-1-yl)-5-iodo-*N*-methylbenzamide (1c)

<sup>1</sup>H NMR (400 MHz, CDCl<sub>3</sub>)

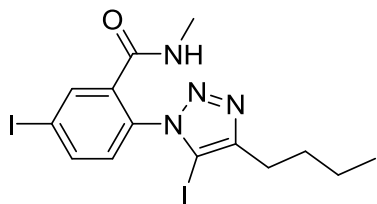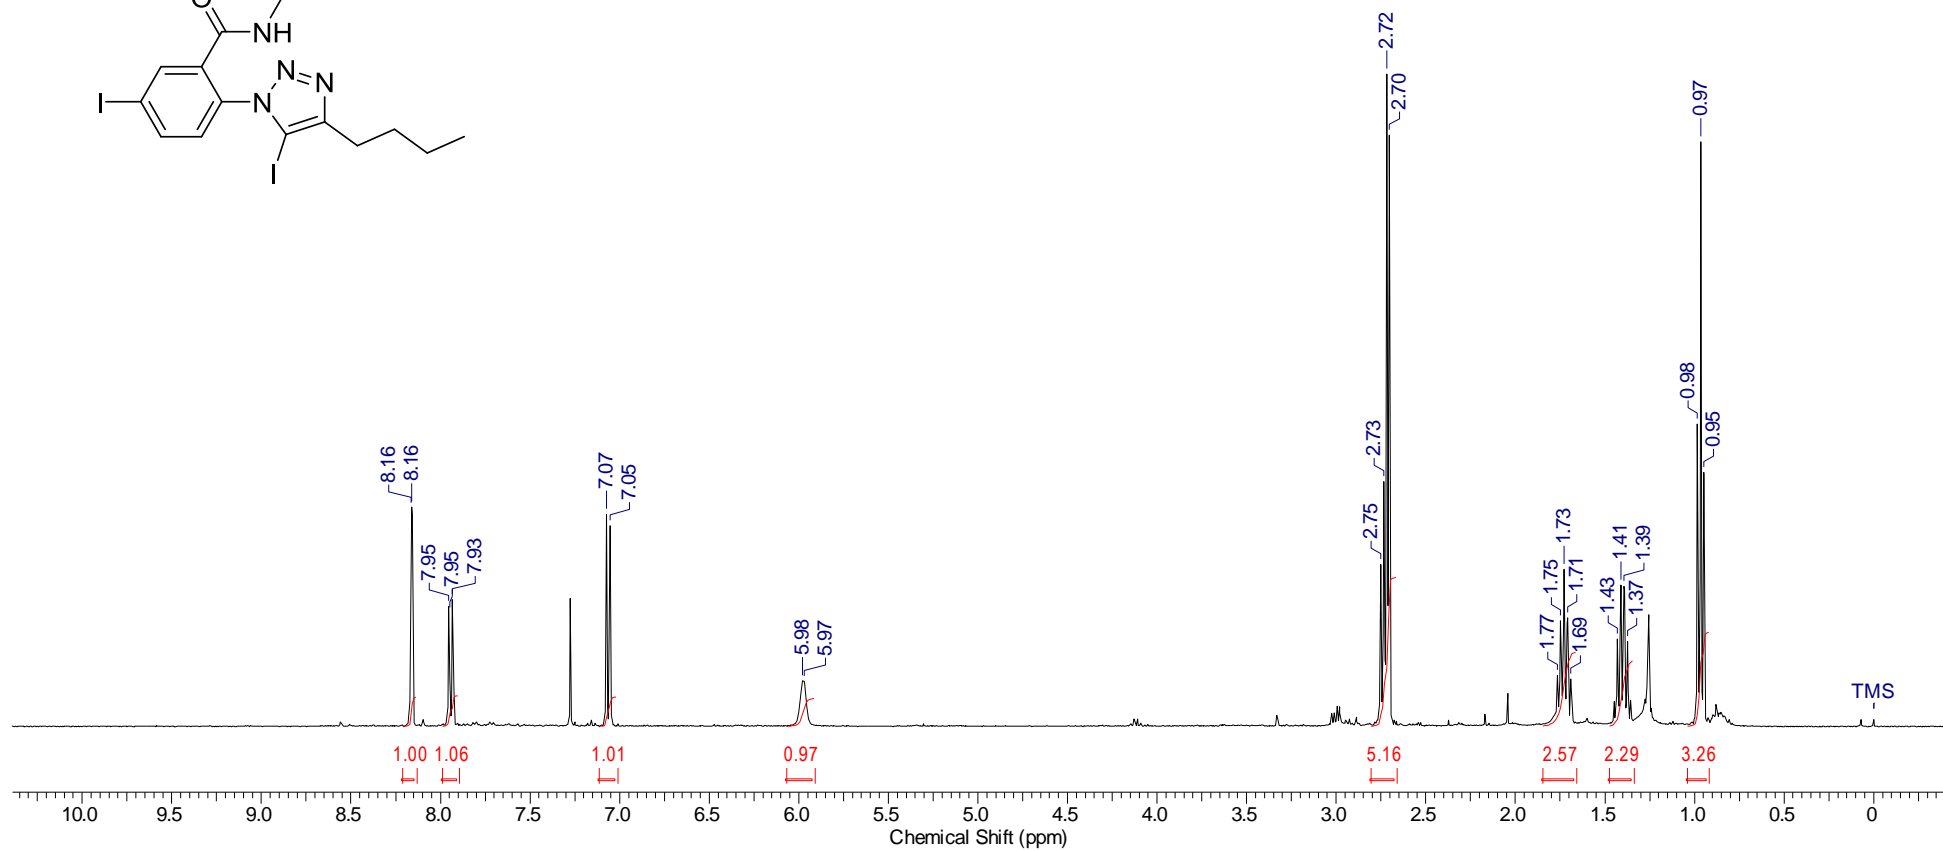

**(4-Butyl-5-iodo-1*H*-1,2,3-triazol-1-yl)-5-iodo-*N*-methylbenzamide (1c)**

$^{13}\text{C}\{^1\text{H}\}$  NMR (100 MHz,  $\text{CDCl}_3$ )

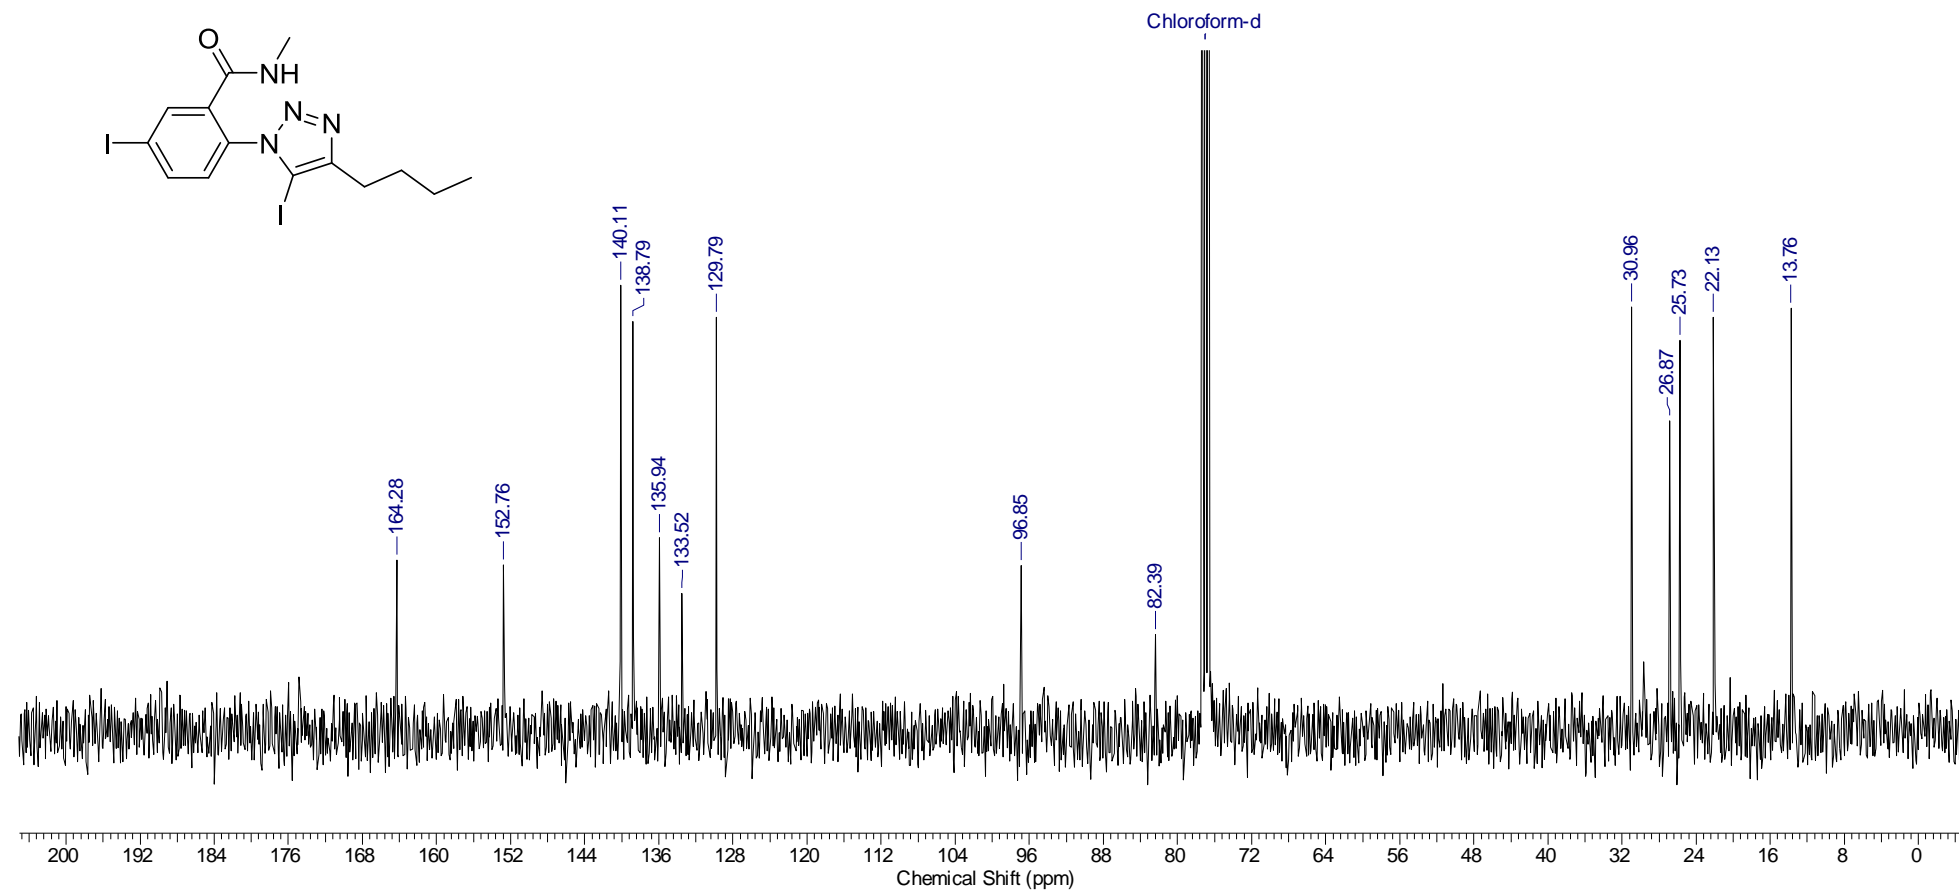



2-(4-Butyl-5-iodo-1*H*-1,2,3-triazol-1-yl)-4-methoxy-*N*-methylbenzamide (1d)

<sup>1</sup>H NMR (400 MHz, CDCl<sub>3</sub>)

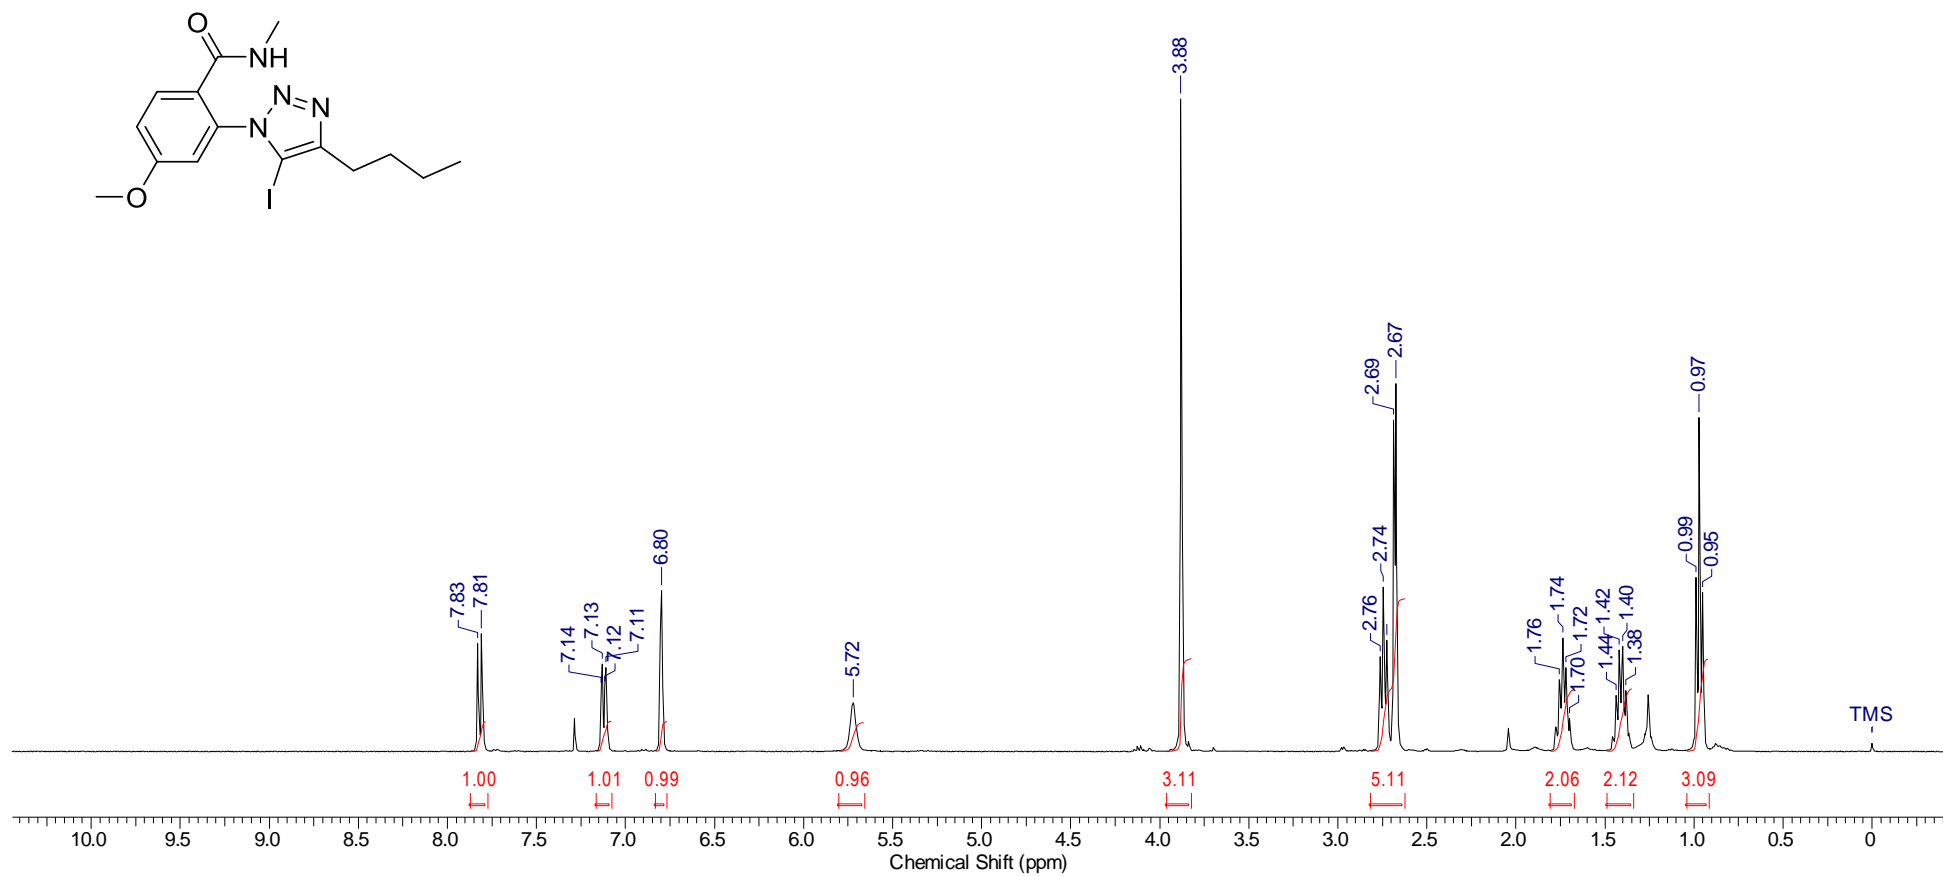

2-(4-Butyl-5-iodo-1H-1,2,3-triazol-1-yl)-4-methoxy-N-methylbenzamide (1d)

$^{13}\text{C}\{^1\text{H}\}$  NMR (100 MHz,  $\text{CDCl}_3$ )

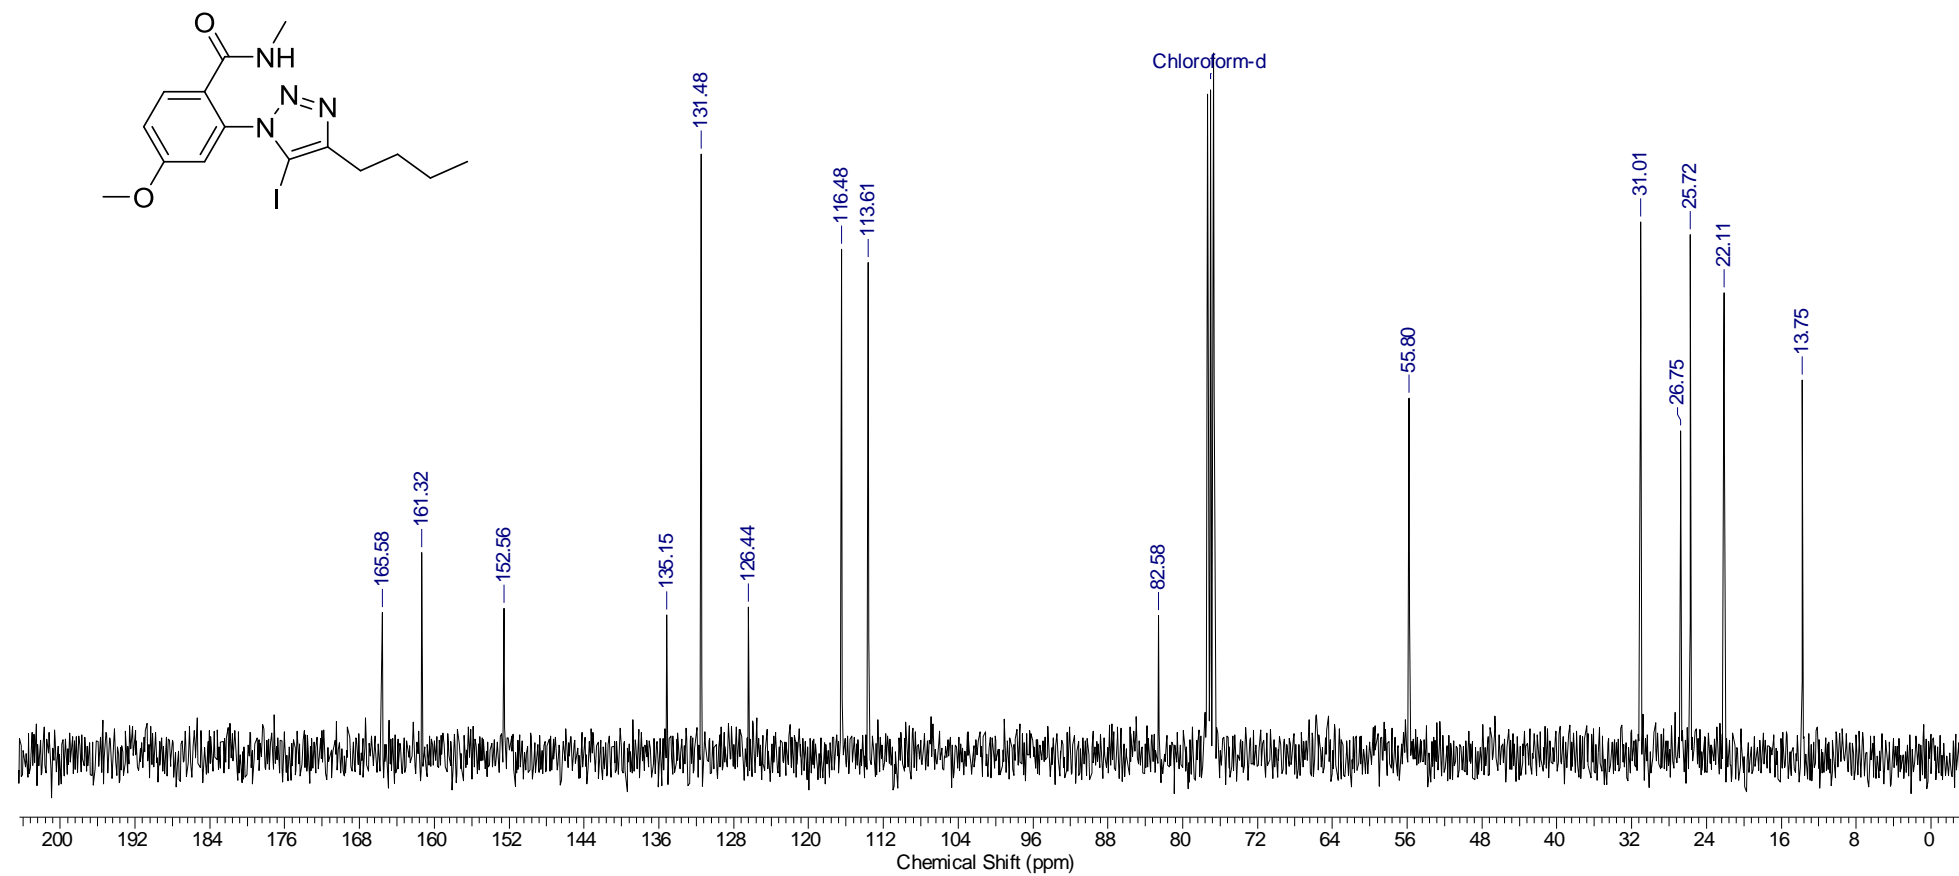

2-(4-Butyl-5-iodo-1*H*-1,2,3-triazol-1-yl)-*N*,6-dimethylbenzamide (1e)

<sup>1</sup>H NMR (400 MHz, CDCl<sub>3</sub>)

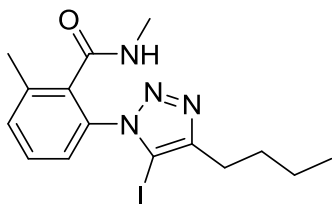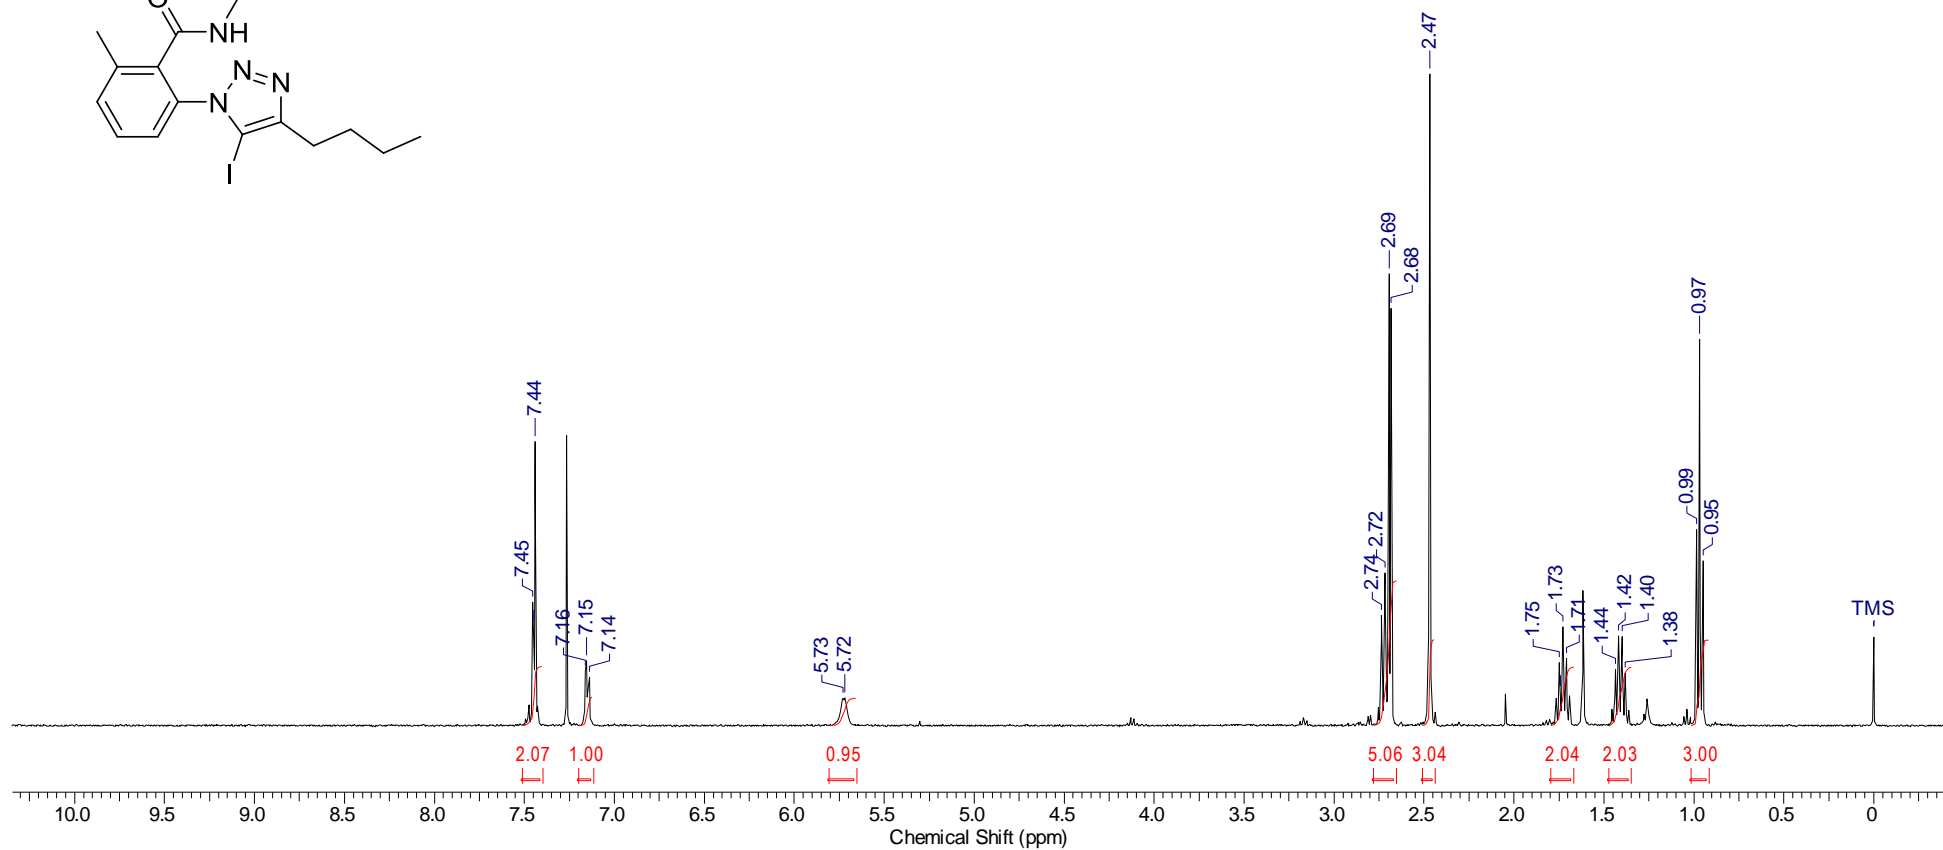

2-(4-Butyl-5-iodo-1*H*-1,2,3-triazol-1-yl)-*N*,6-dimethylbenzamide (1e)

$^{13}\text{C}\{^1\text{H}\}$  NMR (100 MHz,  $\text{CDCl}_3$ )

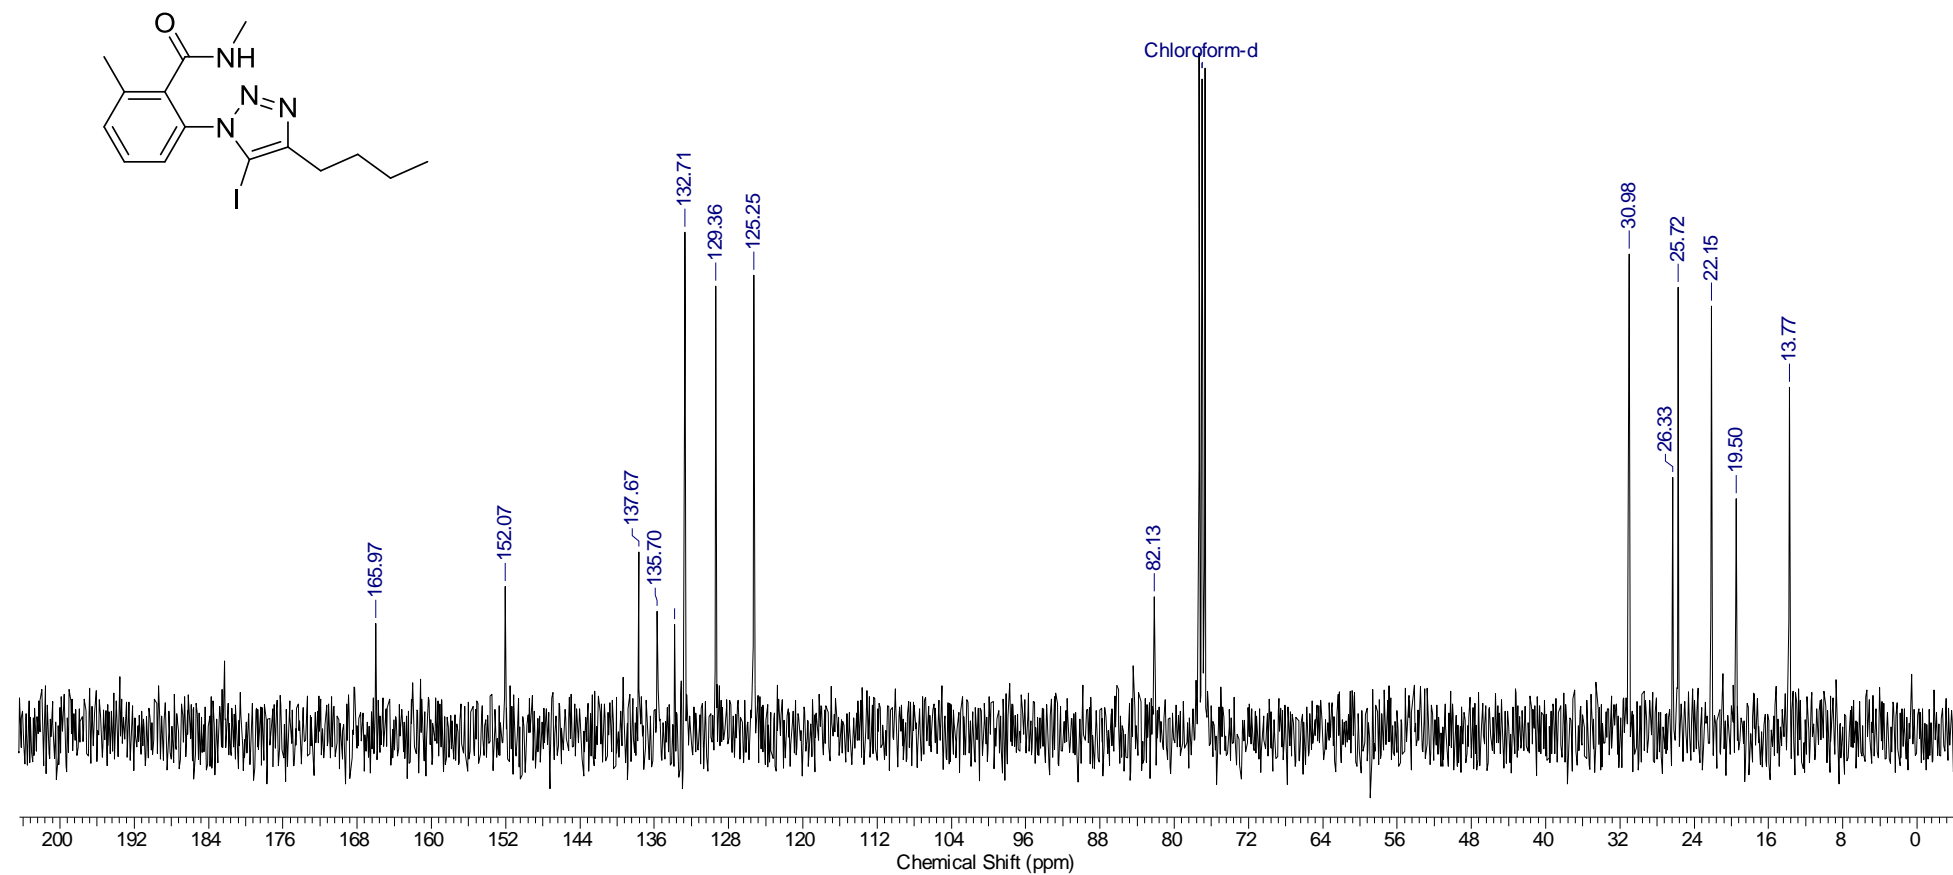

2-(4-Butyl-5-iodo-1H-1,2,3-triazol-1-yl)-N,3-dimethylbenzamide (1f)

<sup>1</sup>H NMR (400 MHz, CDCl<sub>3</sub>)

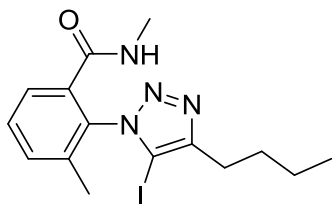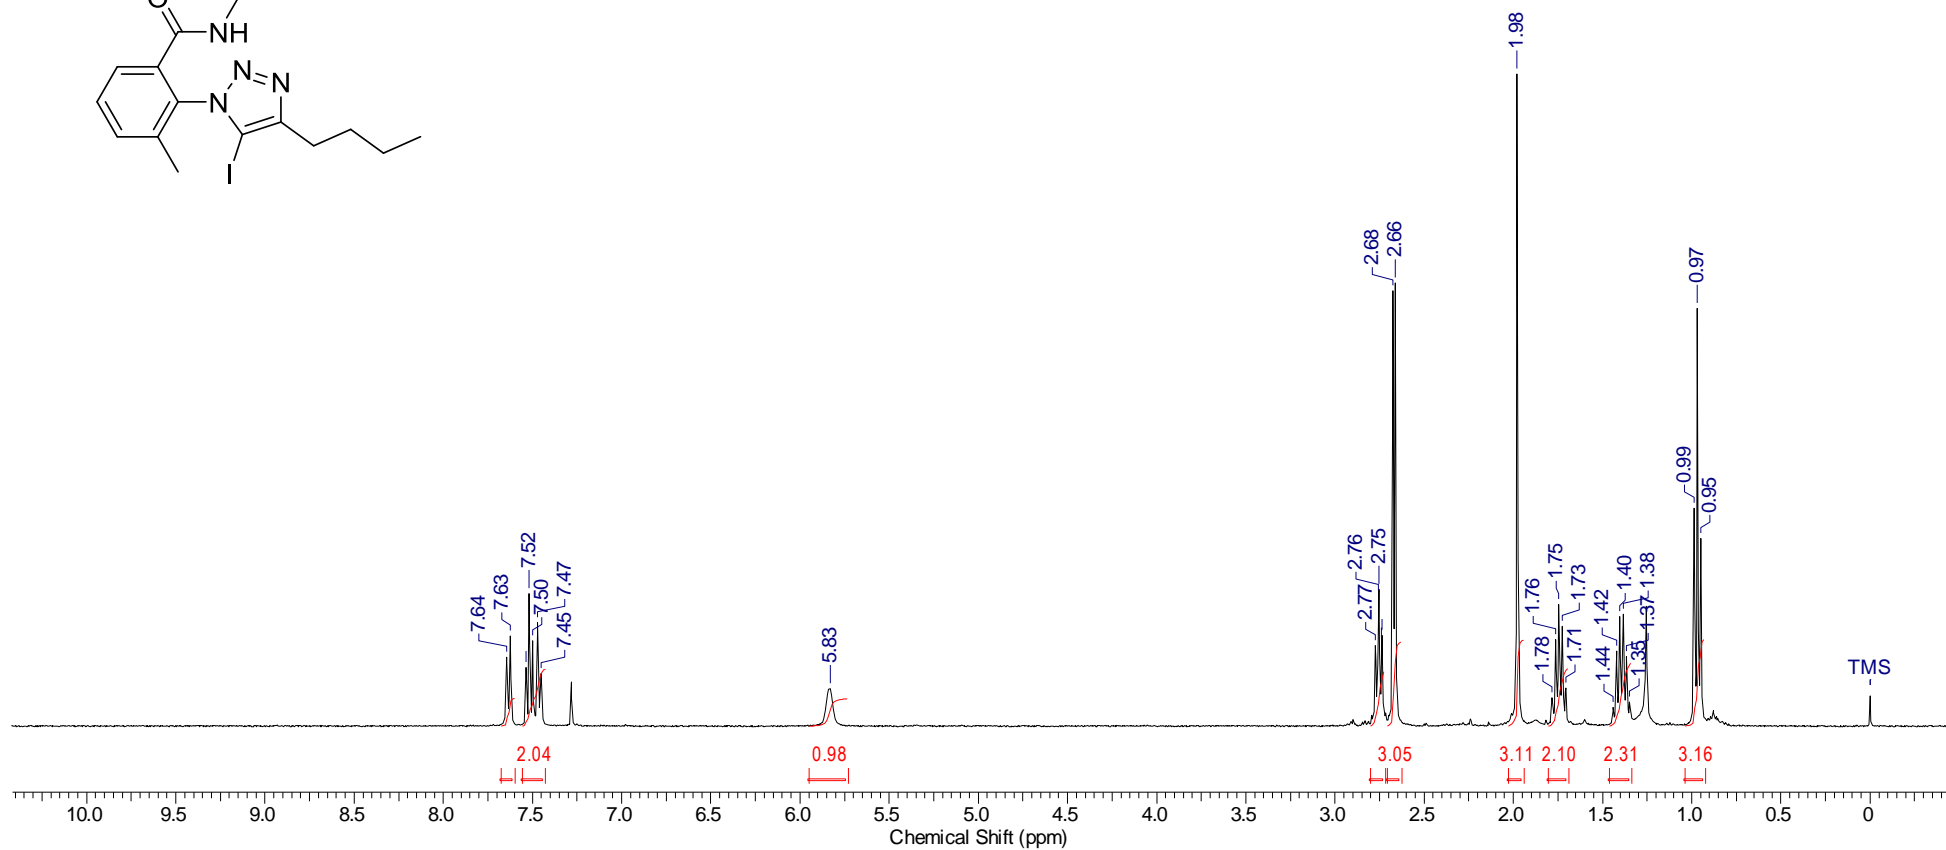

2-(4-Butyl-5-iodo-1*H*-1,2,3-triazol-1-yl)-*N*,3-dimethylbenzamide (1f)

$^{13}\text{C}\{^1\text{H}\}$  NMR (100 MHz,  $\text{CDCl}_3$ )

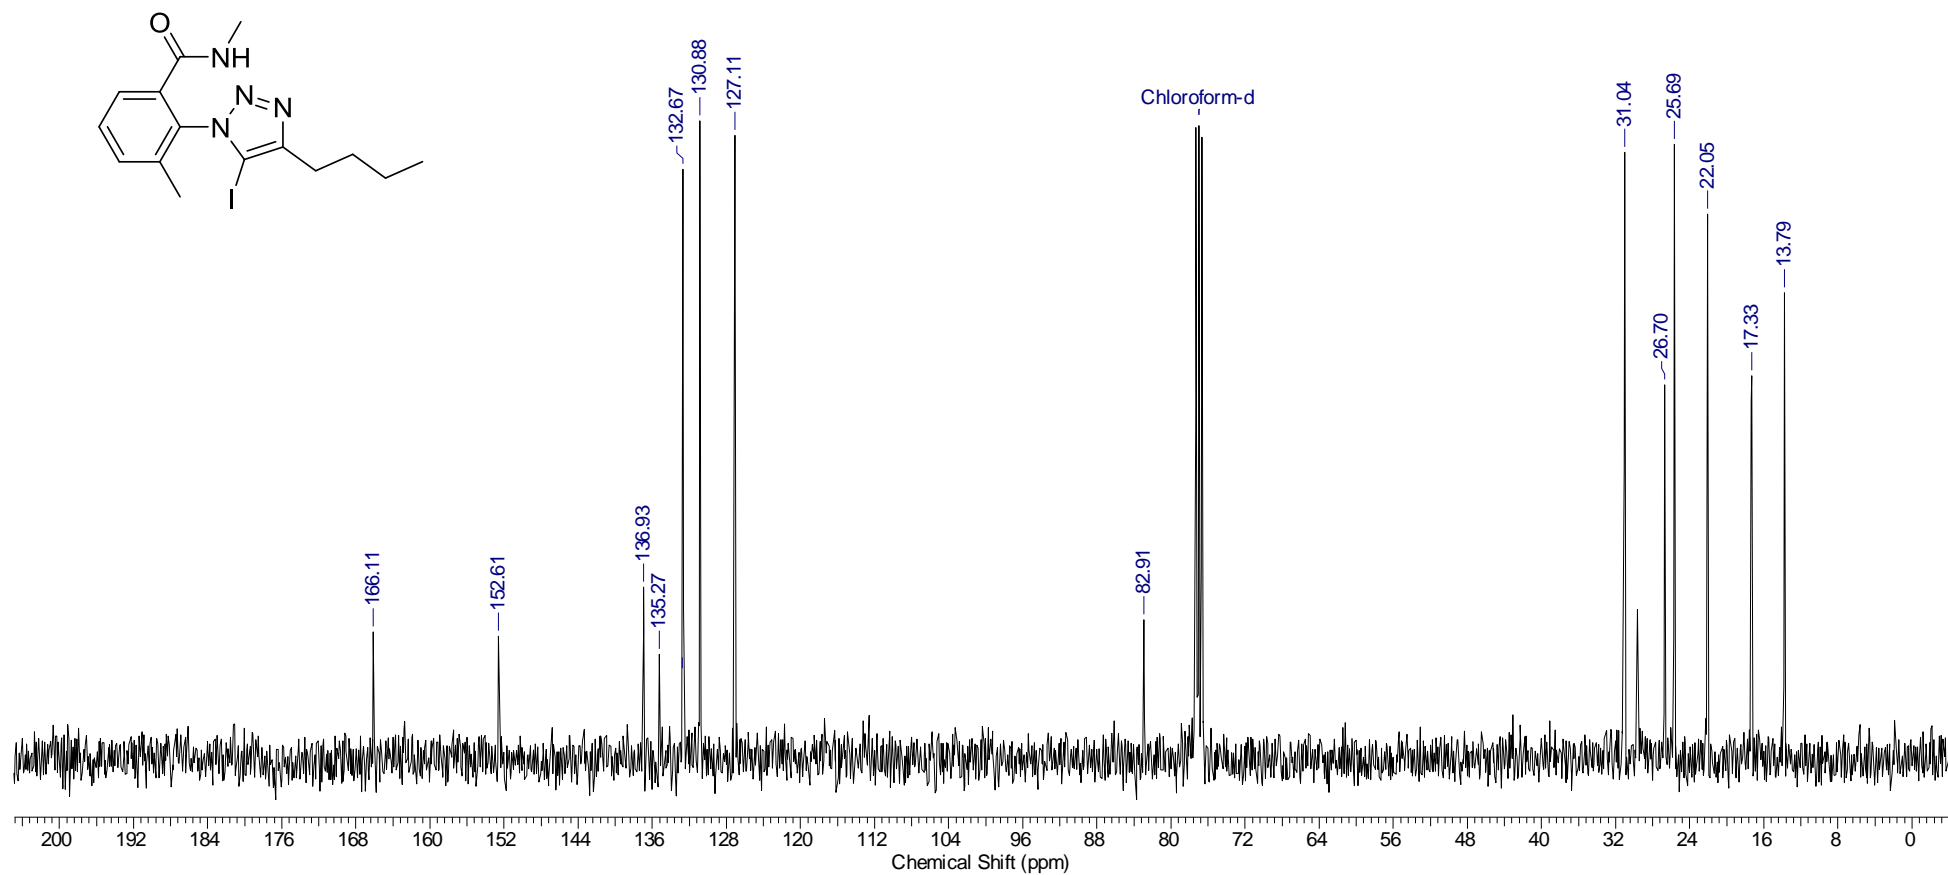

2-(4-*tert*-Butyl-5-iodo-1*H*-1,2,3-triazol-1-yl)-*N*-methylbenzamide (1g)

<sup>1</sup>H NMR (400 MHz, CDCl<sub>3</sub>-CD<sub>3</sub>OD)

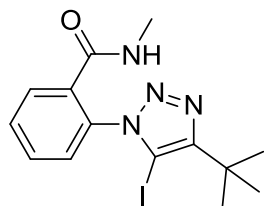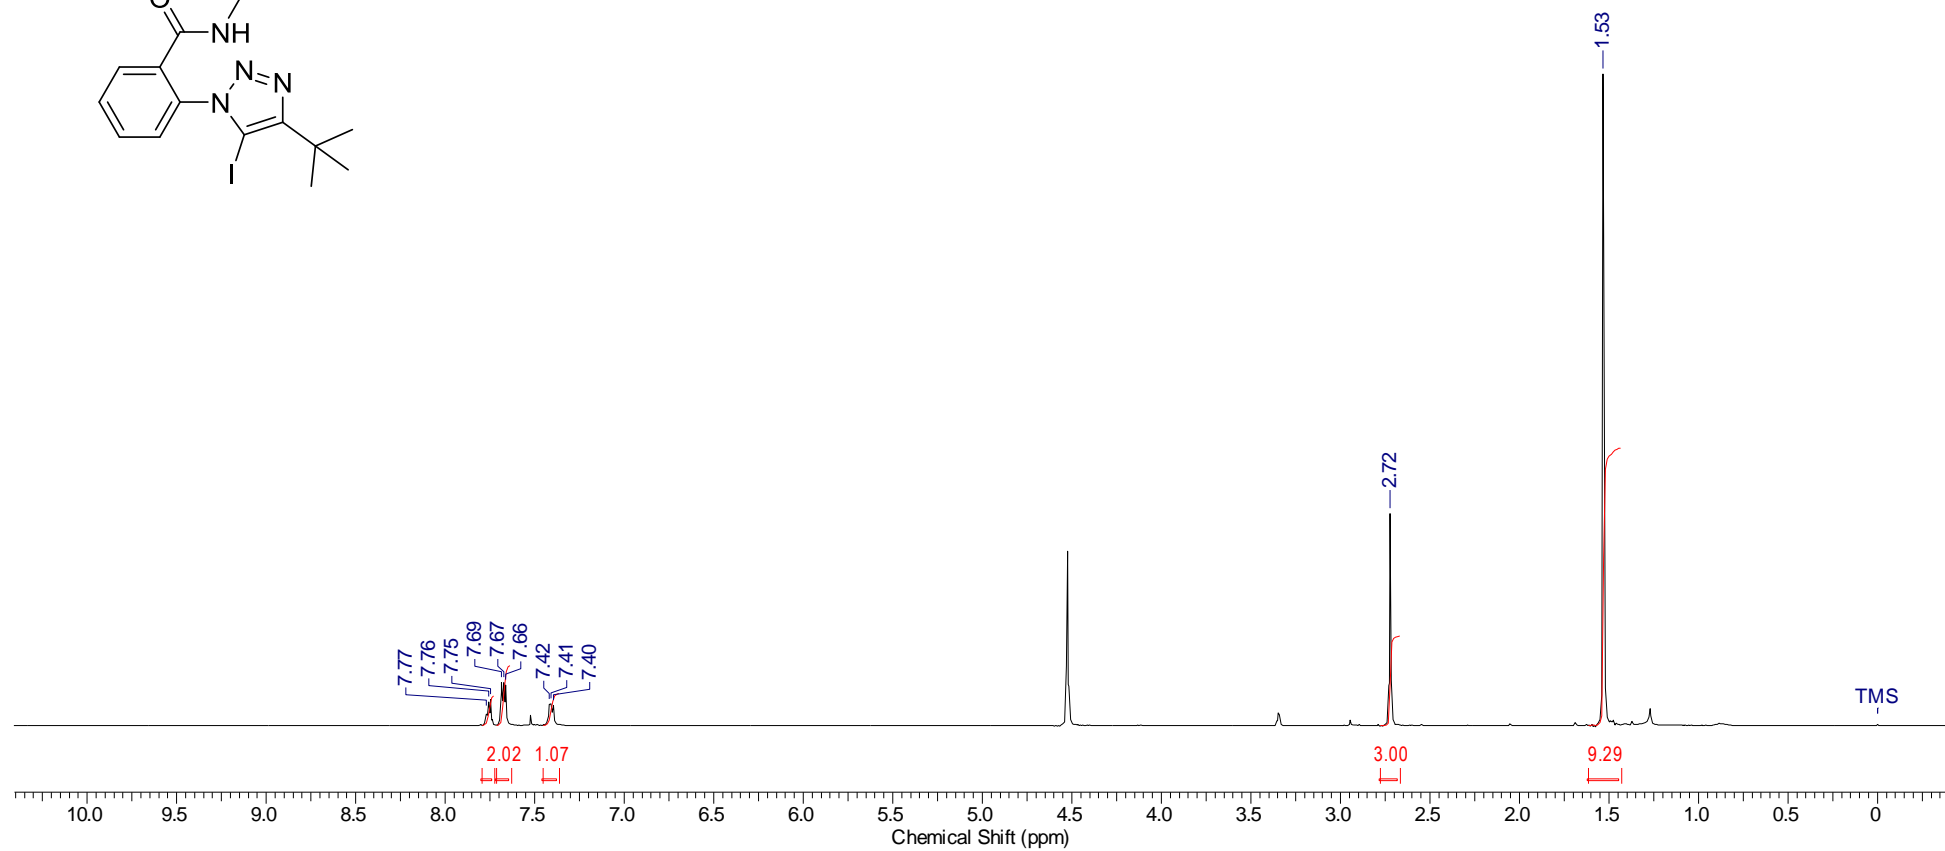

2-(4-*tert*-Butyl-5-iodo-1*H*-1,2,3-triazol-1-yl)-*N*-methylbenzamide (1g)

$^{13}\text{C}\{^1\text{H}\}$  NMR (100 MHz,  $\text{CDCl}_3\text{-CD}_3\text{OD}$ )

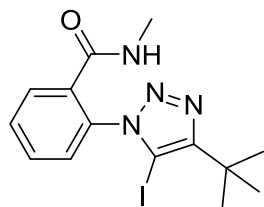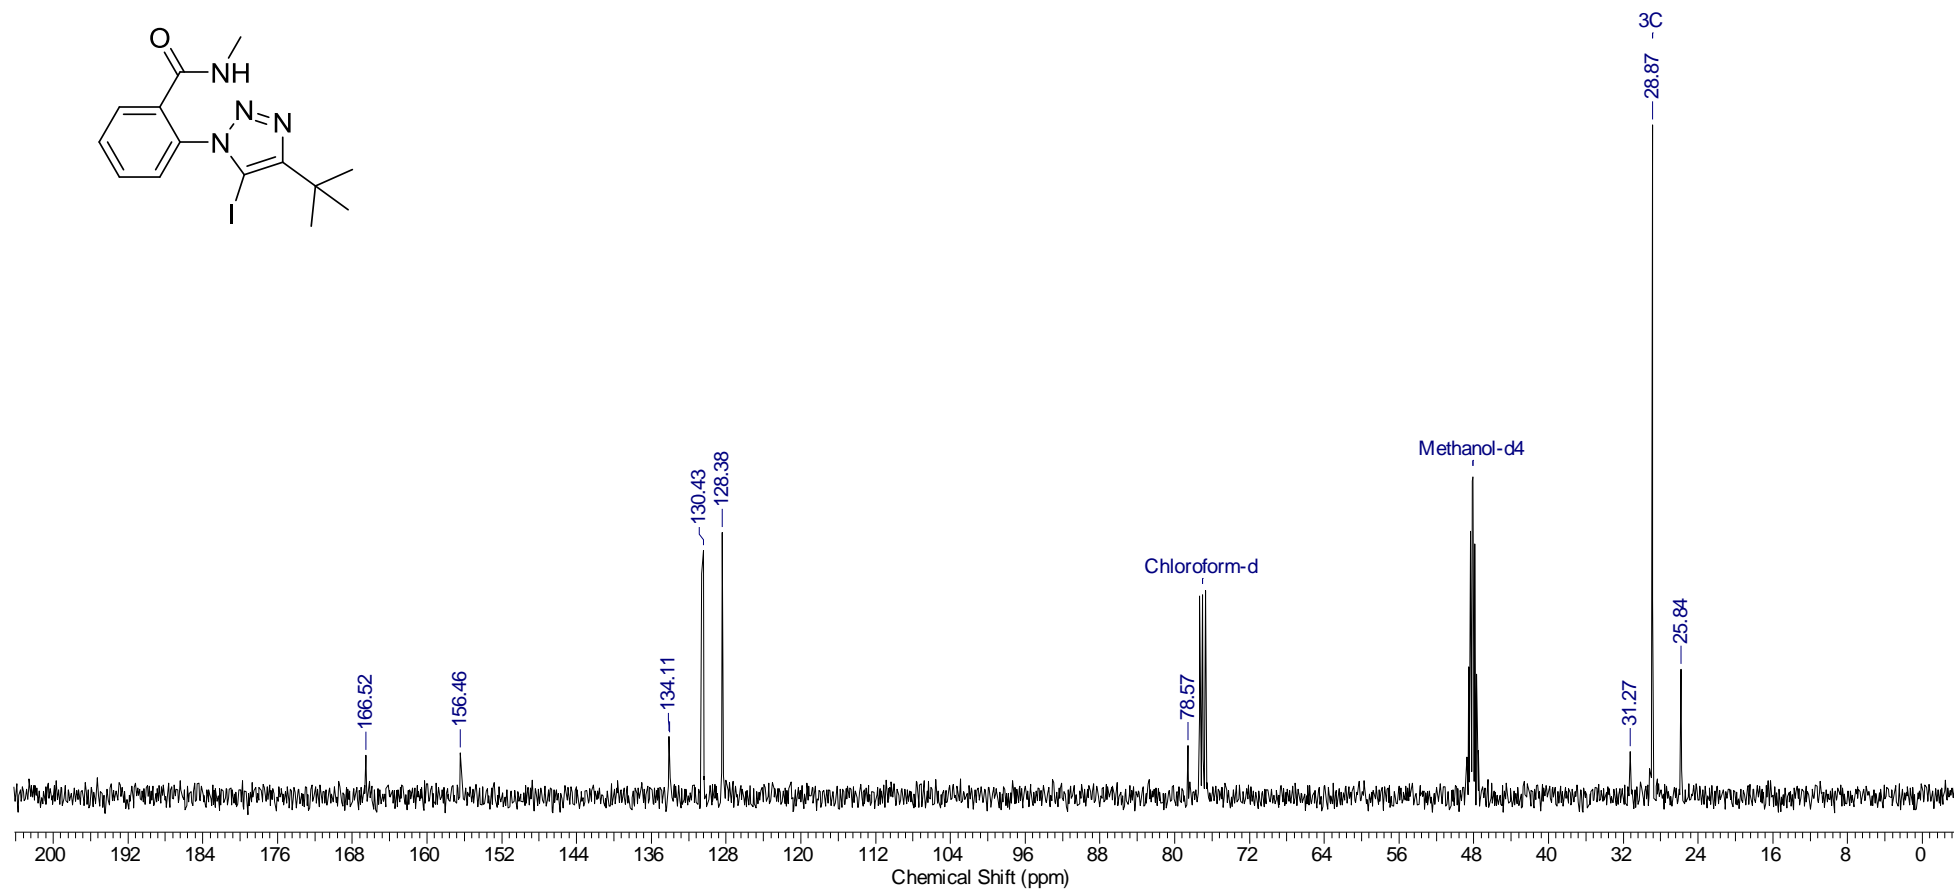



2-(5-Iodo-4-phenyl-1*H*-1,2,3-triazol-1-yl)-*N*-methylbenzamide (1h)

<sup>1</sup>H NMR (400 MHz, CDCl<sub>3</sub>)

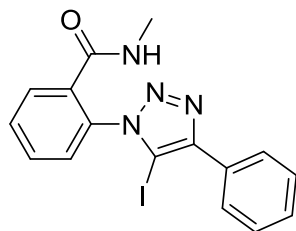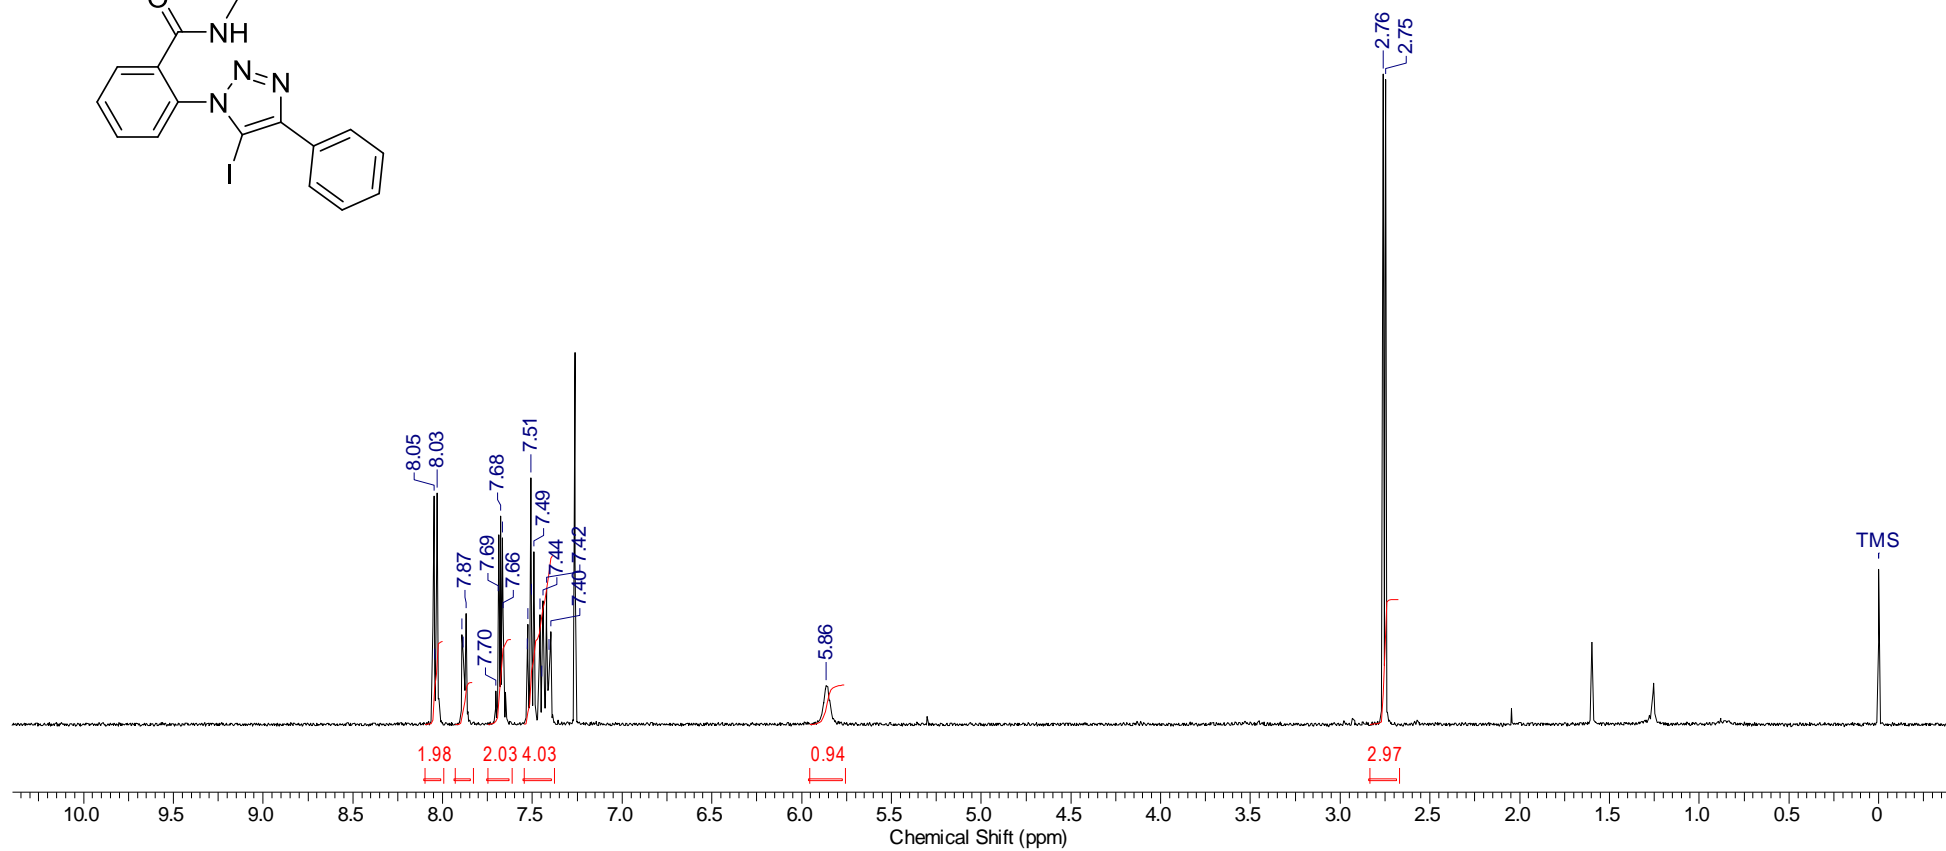

2-(5-Iodo-4-phenyl-1H-1,2,3-triazol-1-yl)-N-methylbenzamide (1h)

$^{13}\text{C}\{^1\text{H}\}$  NMR (100 MHz,  $\text{CDCl}_3$ )

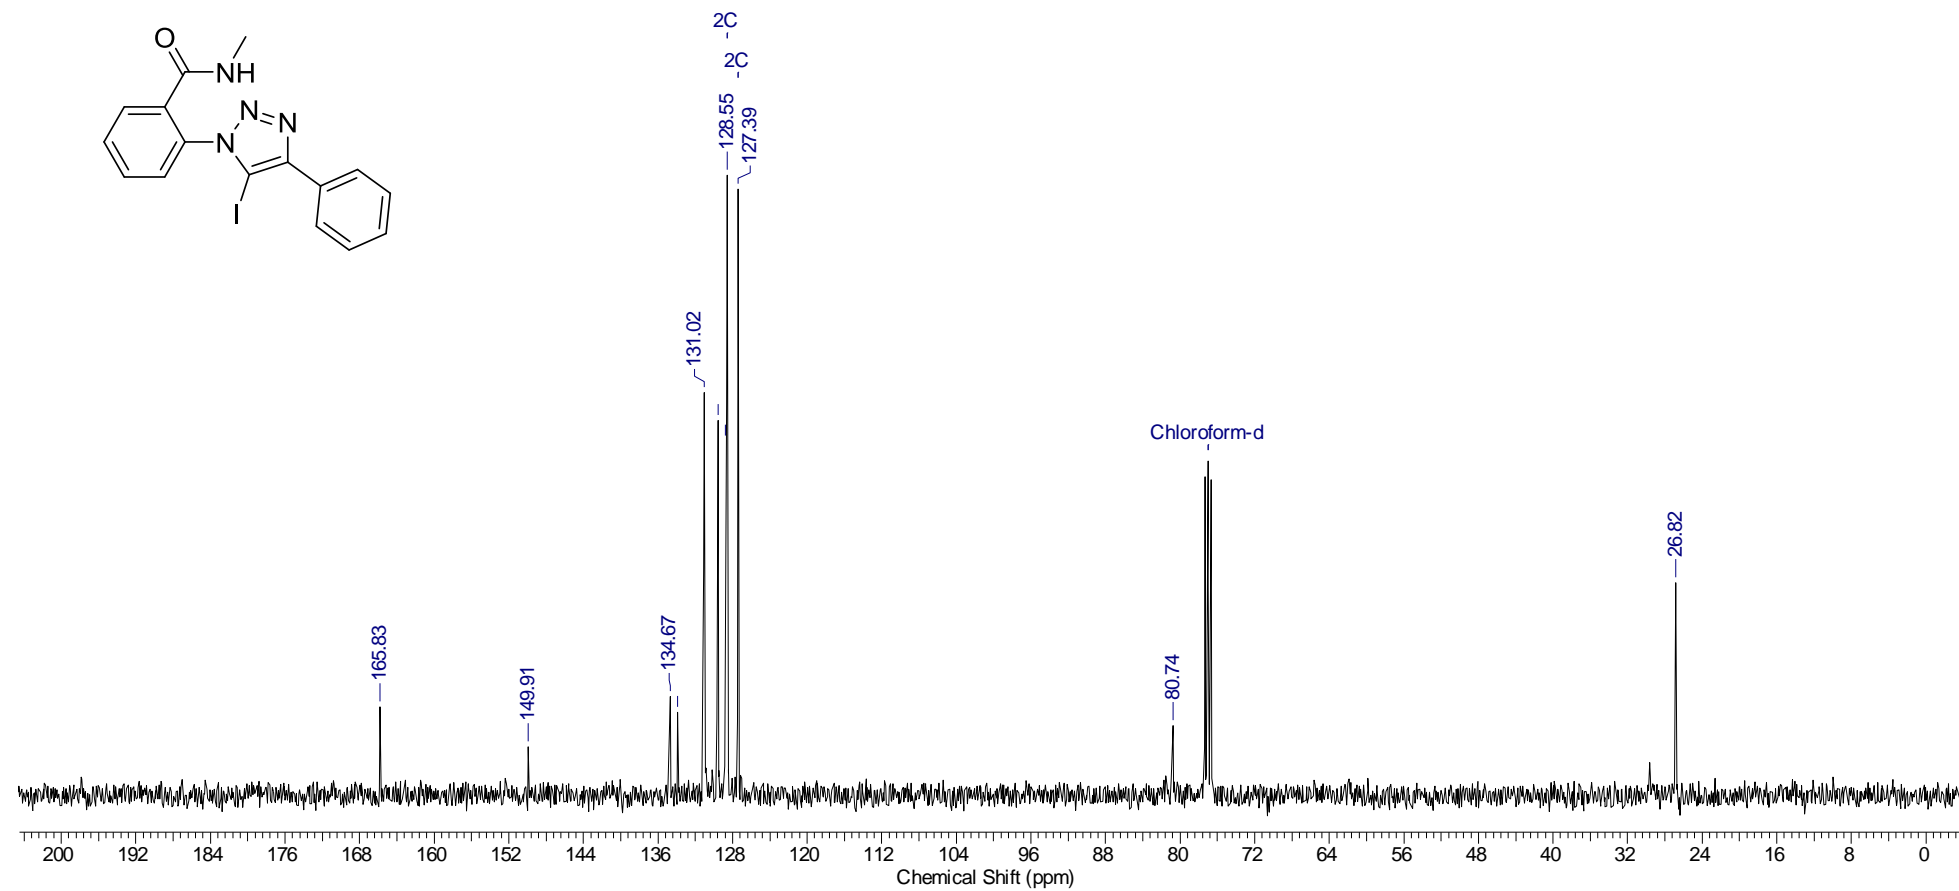

2-{5-Iodo-4-[2-(trifluoromethyl)phenyl]-1H-1,2,3-triazol-1-yl]-N-methylbenzamide (1i)

<sup>1</sup>H NMR (400 MHz, CDCl<sub>3</sub>-CD<sub>3</sub>OD)

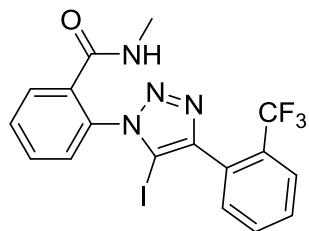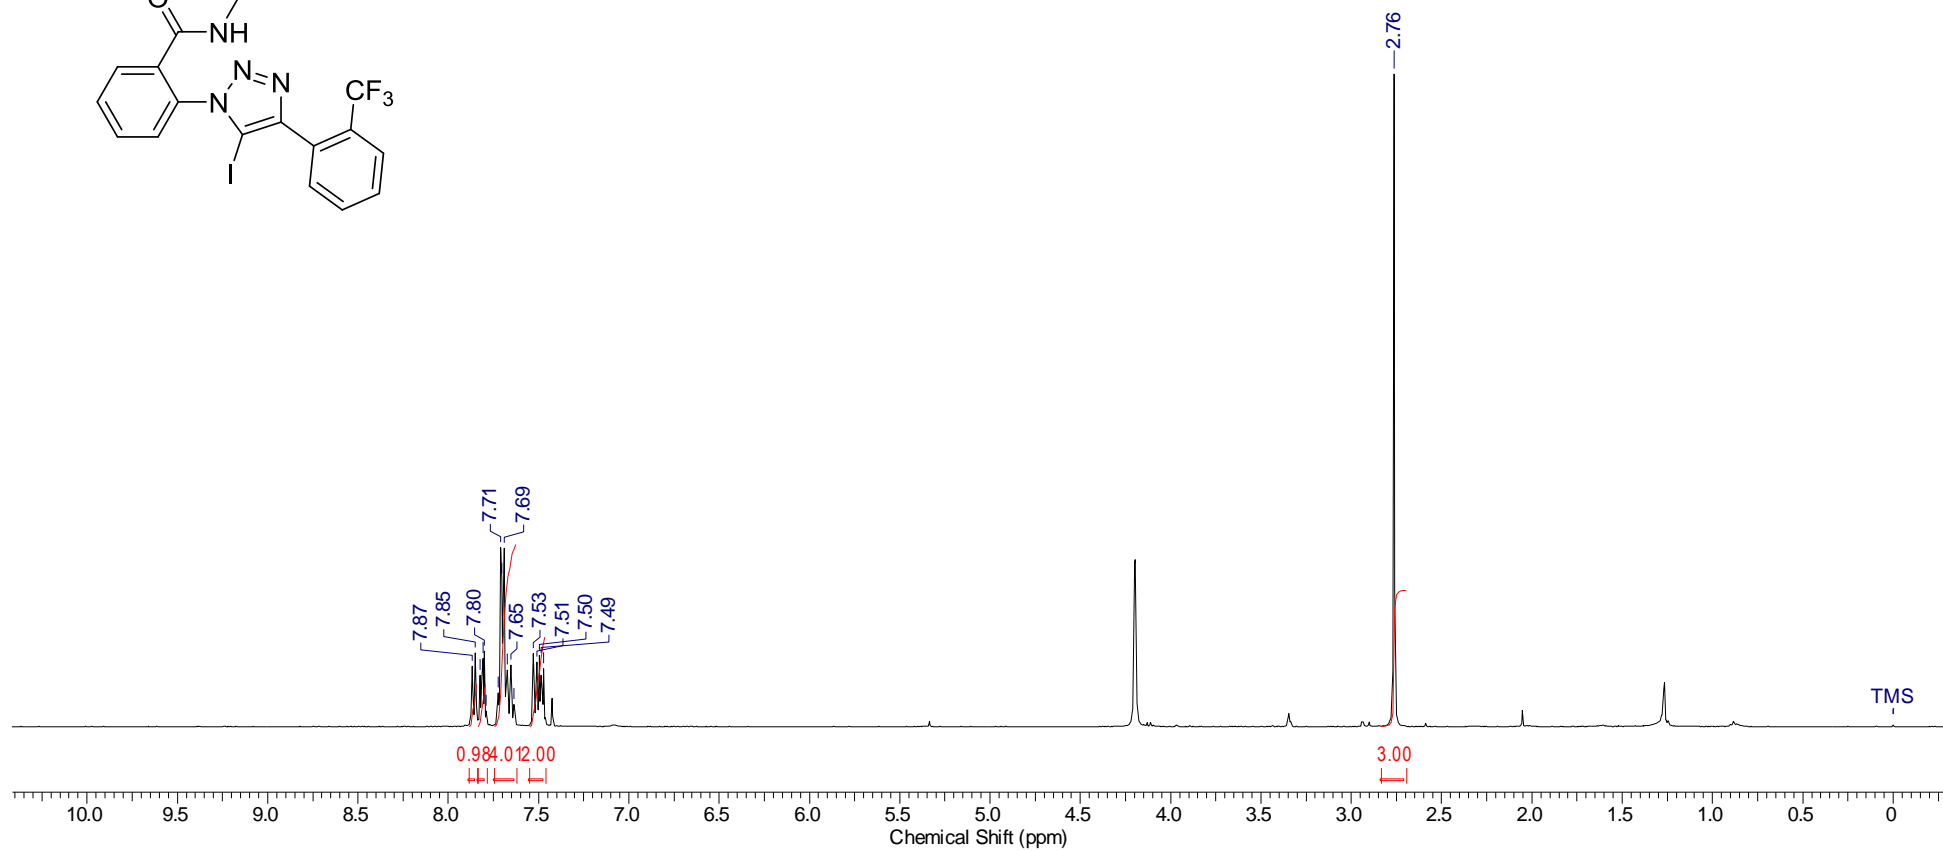

2-{5-Iodo-4-[2-(trifluoromethyl)phenyl]-1*H*-1,2,3-triazol-1-yl]-*N*-methylbenzamide (1i)

$^{13}\text{C}\{^1\text{H}\}$  NMR (100 MHz,  $\text{CDCl}_3\text{-CD}_3\text{OD}$ )

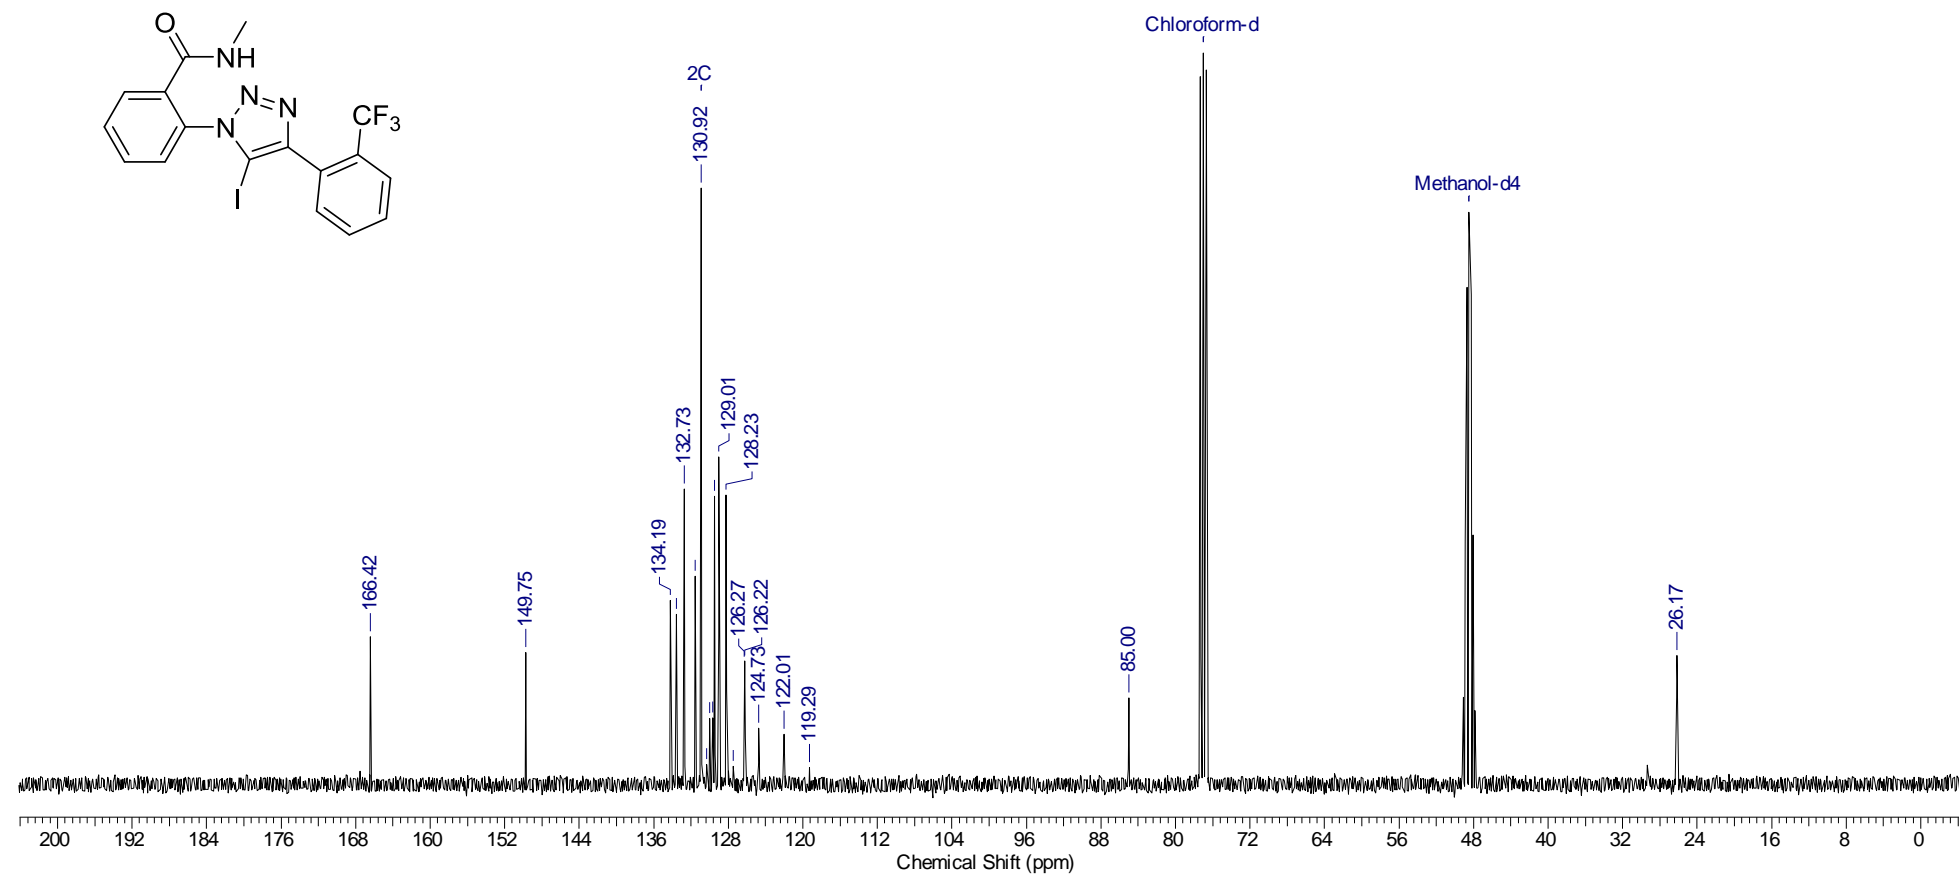

2-[4-(1-Hydroxy-1-methylethyl)-5-iodo-1*H*-1,2,3-triazol-1-yl]-*N*-methylbenzamide (1j)

<sup>1</sup>H NMR (400 MHz, CDCl<sub>3</sub>-CD<sub>3</sub>OD)

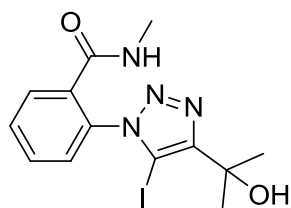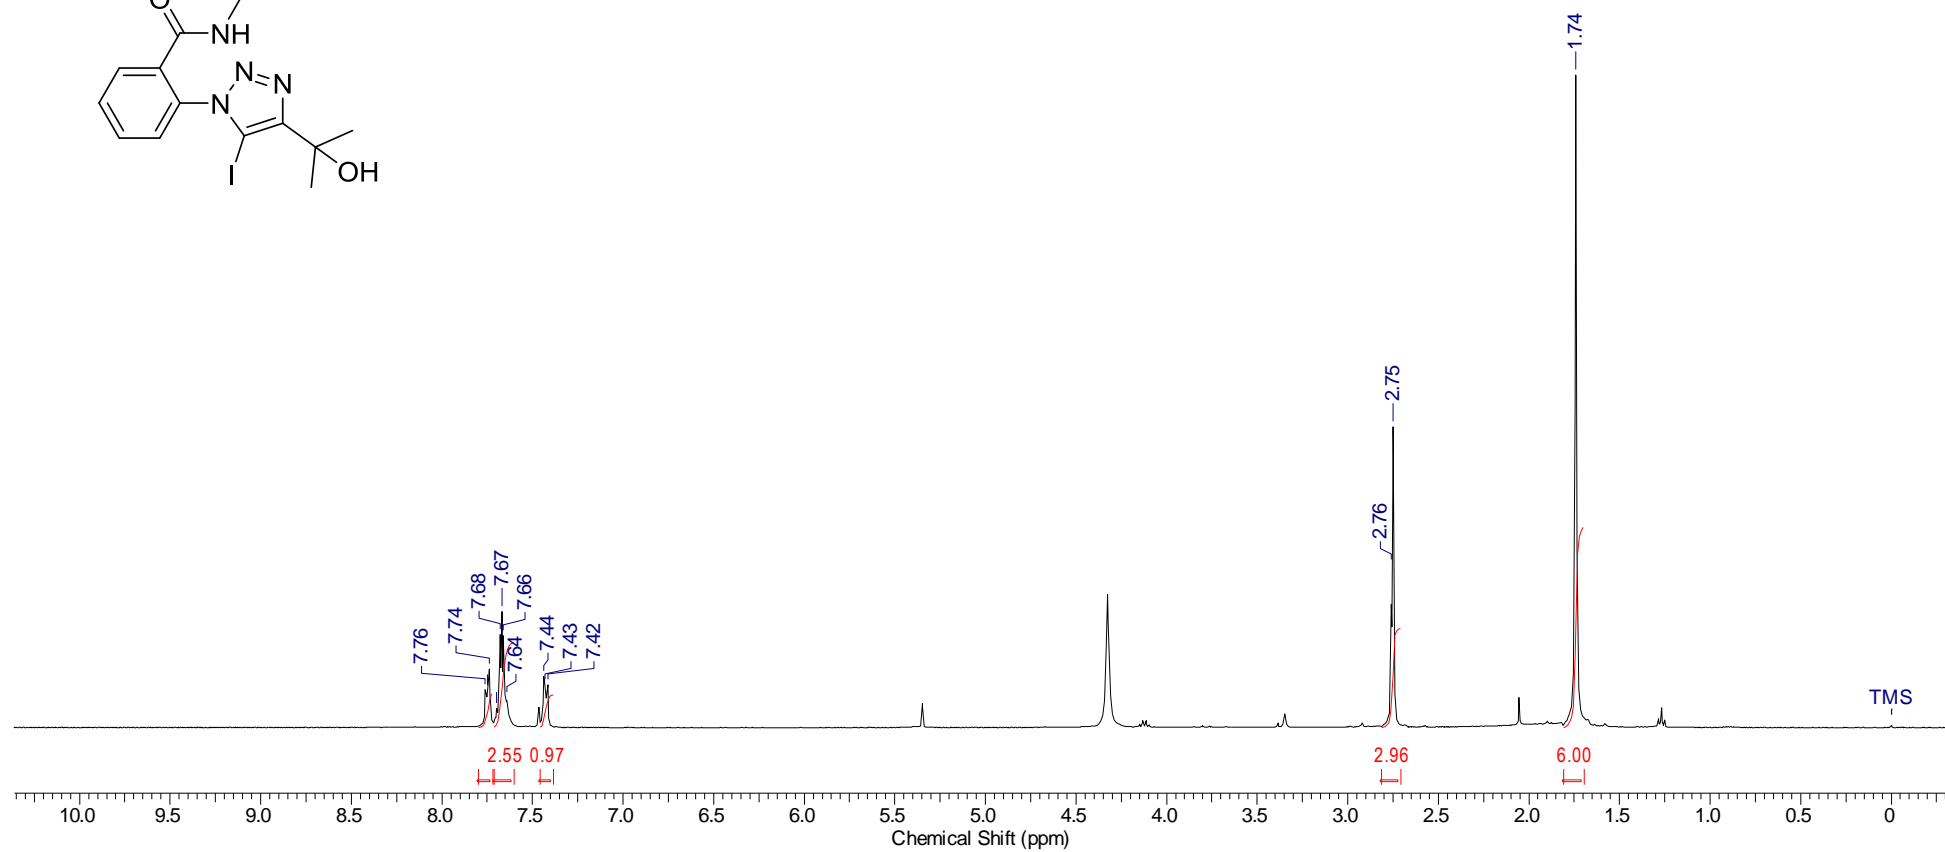

2-[4-(1-Hydroxy-1-methylethyl)-5-iodo-1*H*-1,2,3-triazol-1-yl]-*N*-methylbenzamide (1j)

$^{13}\text{C}\{^1\text{H}\}$  NMR (100 MHz,  $\text{CDCl}_3\text{-CD}_3\text{OD}$ )

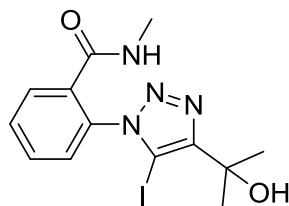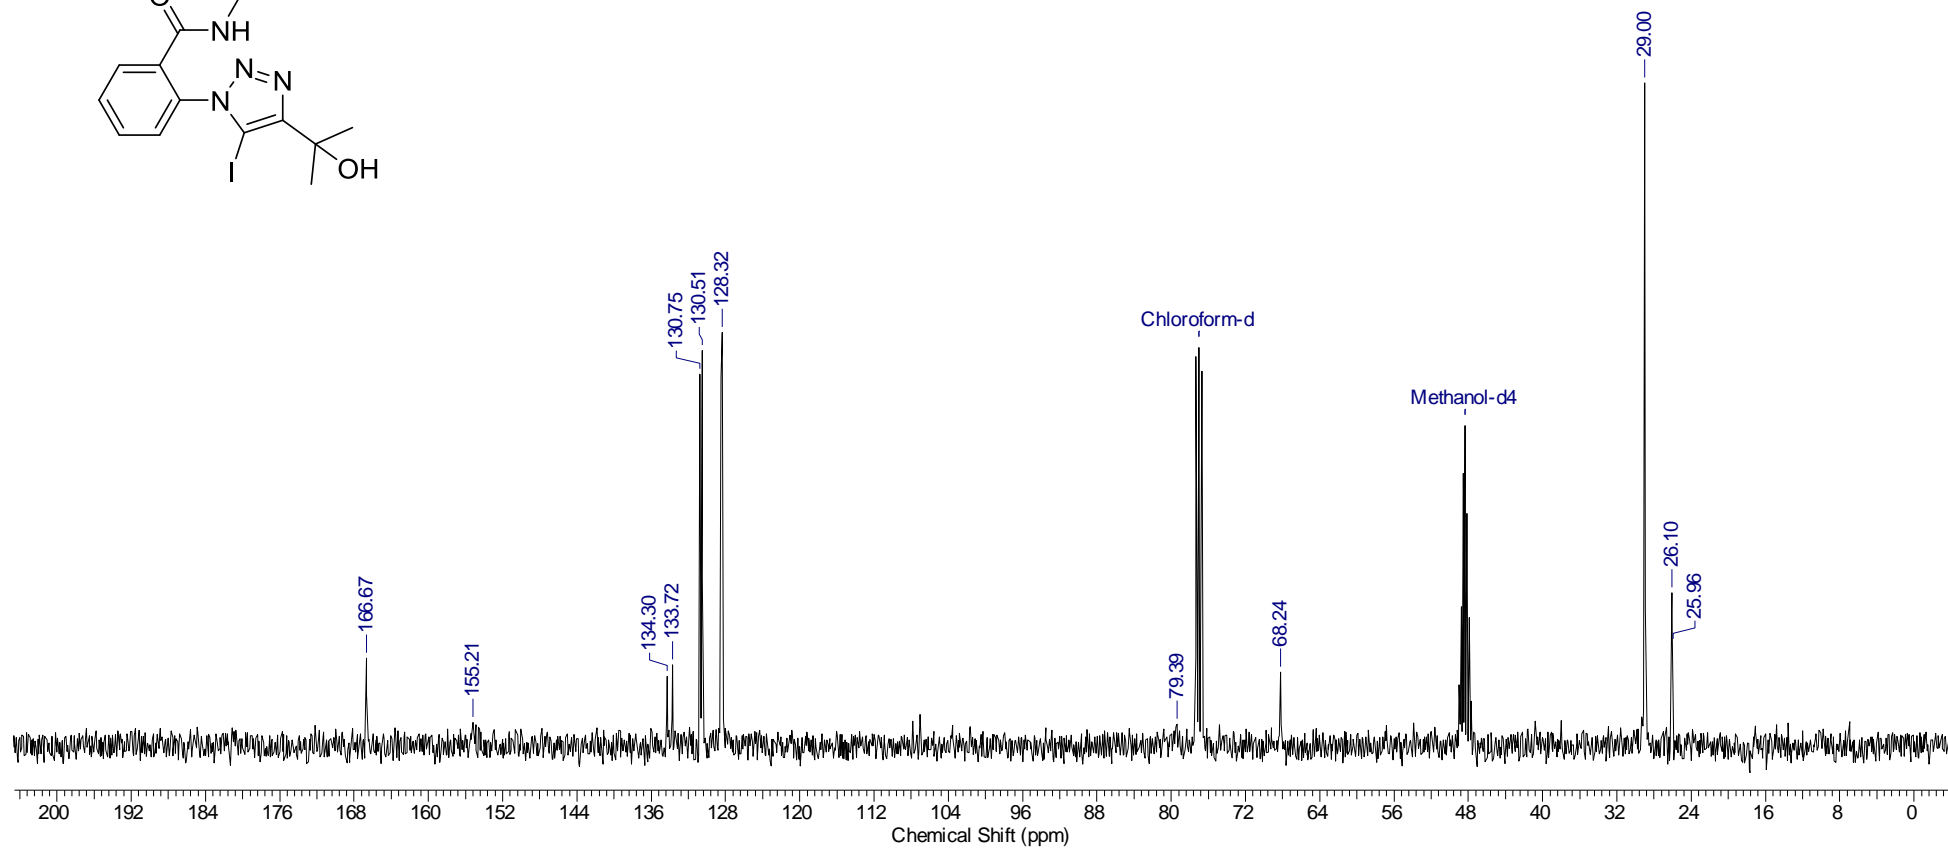

2-[4-(2-Hydroxyethyl)-5-iodo-1*H*-1,2,3-triazol-1-yl]-*N*-methylbenzamide (1k)

<sup>1</sup>H NMR (400 MHz, DMSO-*d*<sub>6</sub>)

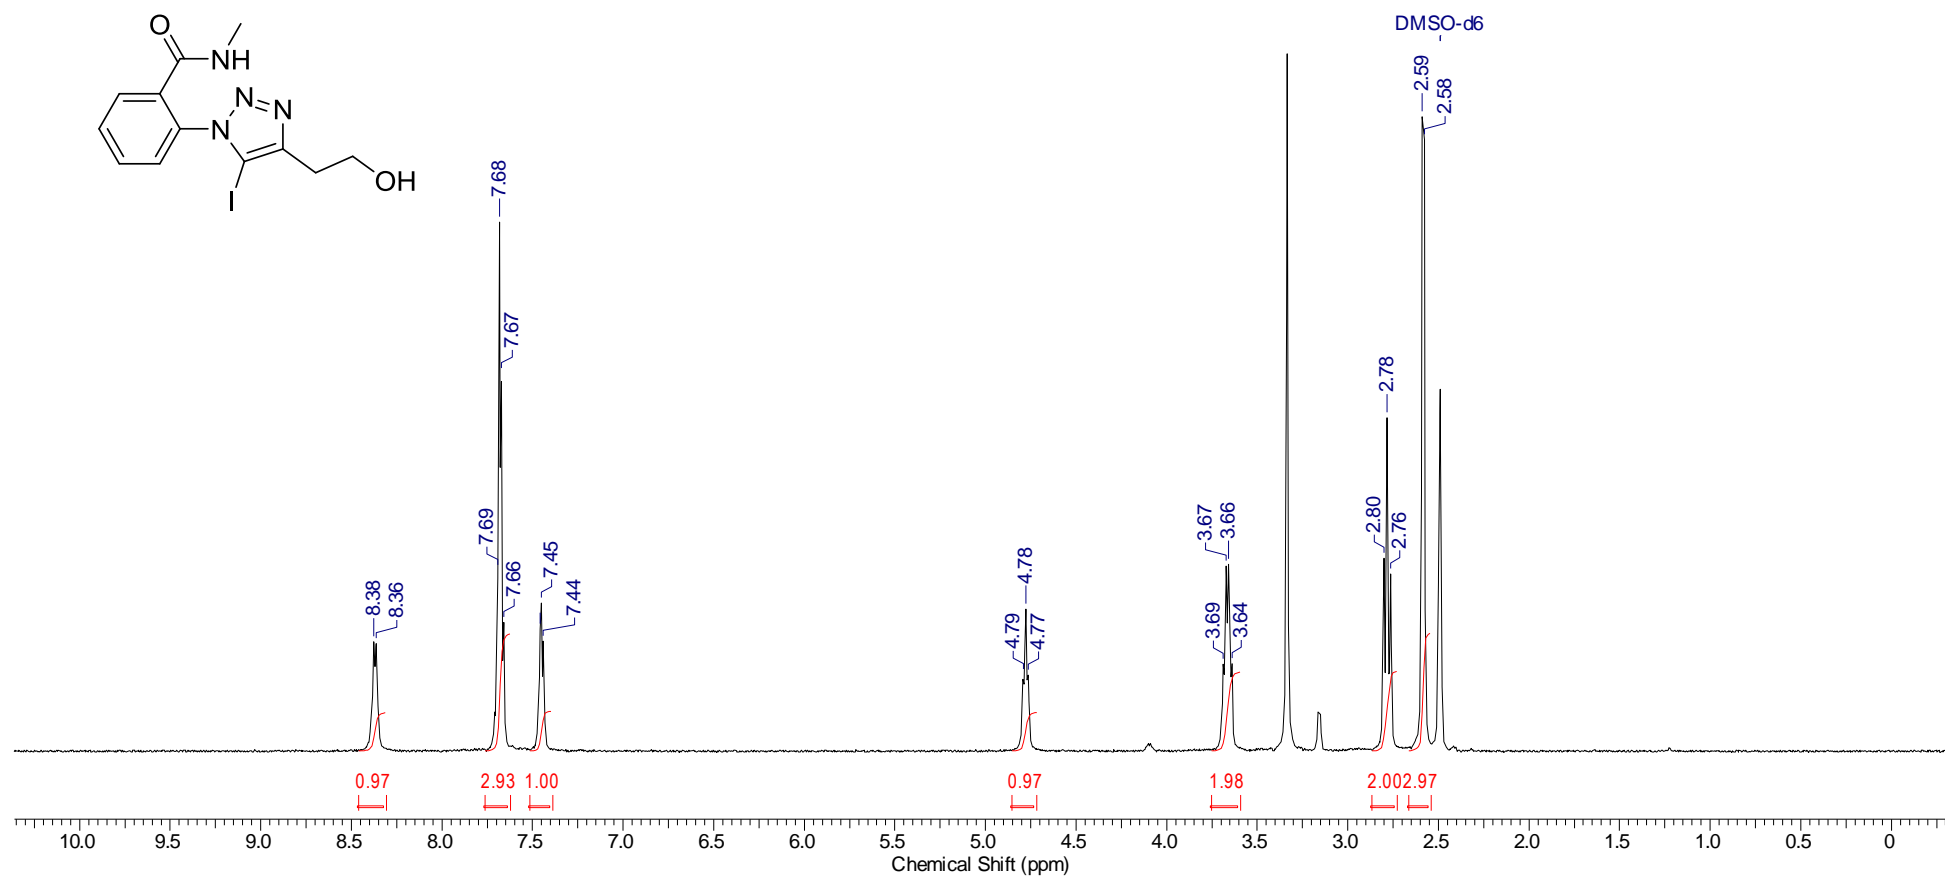

2-[4-(2-Hydroxyethyl)-5-iodo-1*H*-1,2,3-triazol-1-yl]-*N*-methylbenzamide (1k)

$^{13}\text{C}\{^1\text{H}\}$  NMR (100 MHz,  $\text{DMSO-}d_6$ )

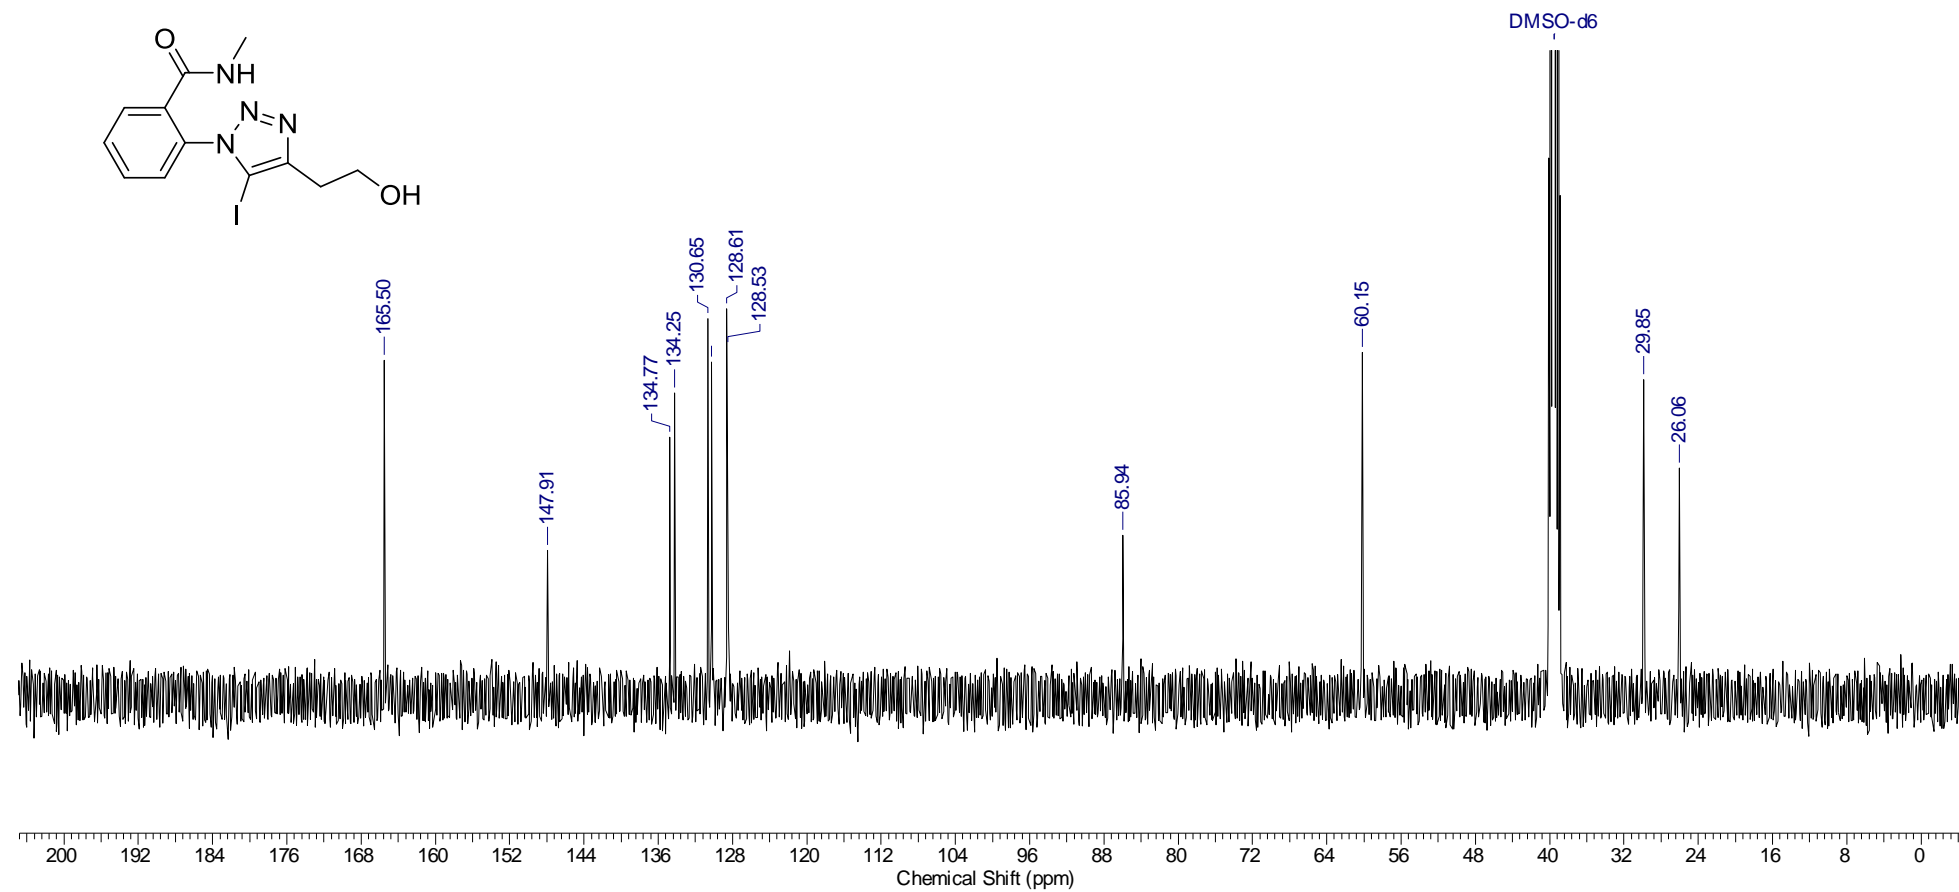



2-[4-(4-*tert*-Butylphenyl)-5-iodo-1*H*-1,2,3-triazol-1-yl]-*N*-methylbenzamide (1)

<sup>1</sup>H NMR (400 MHz, CDCl<sub>3</sub>-CD<sub>3</sub>OD)

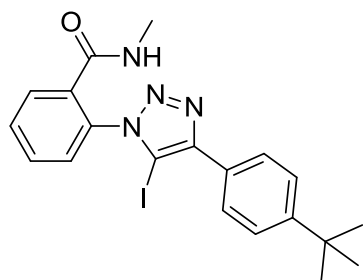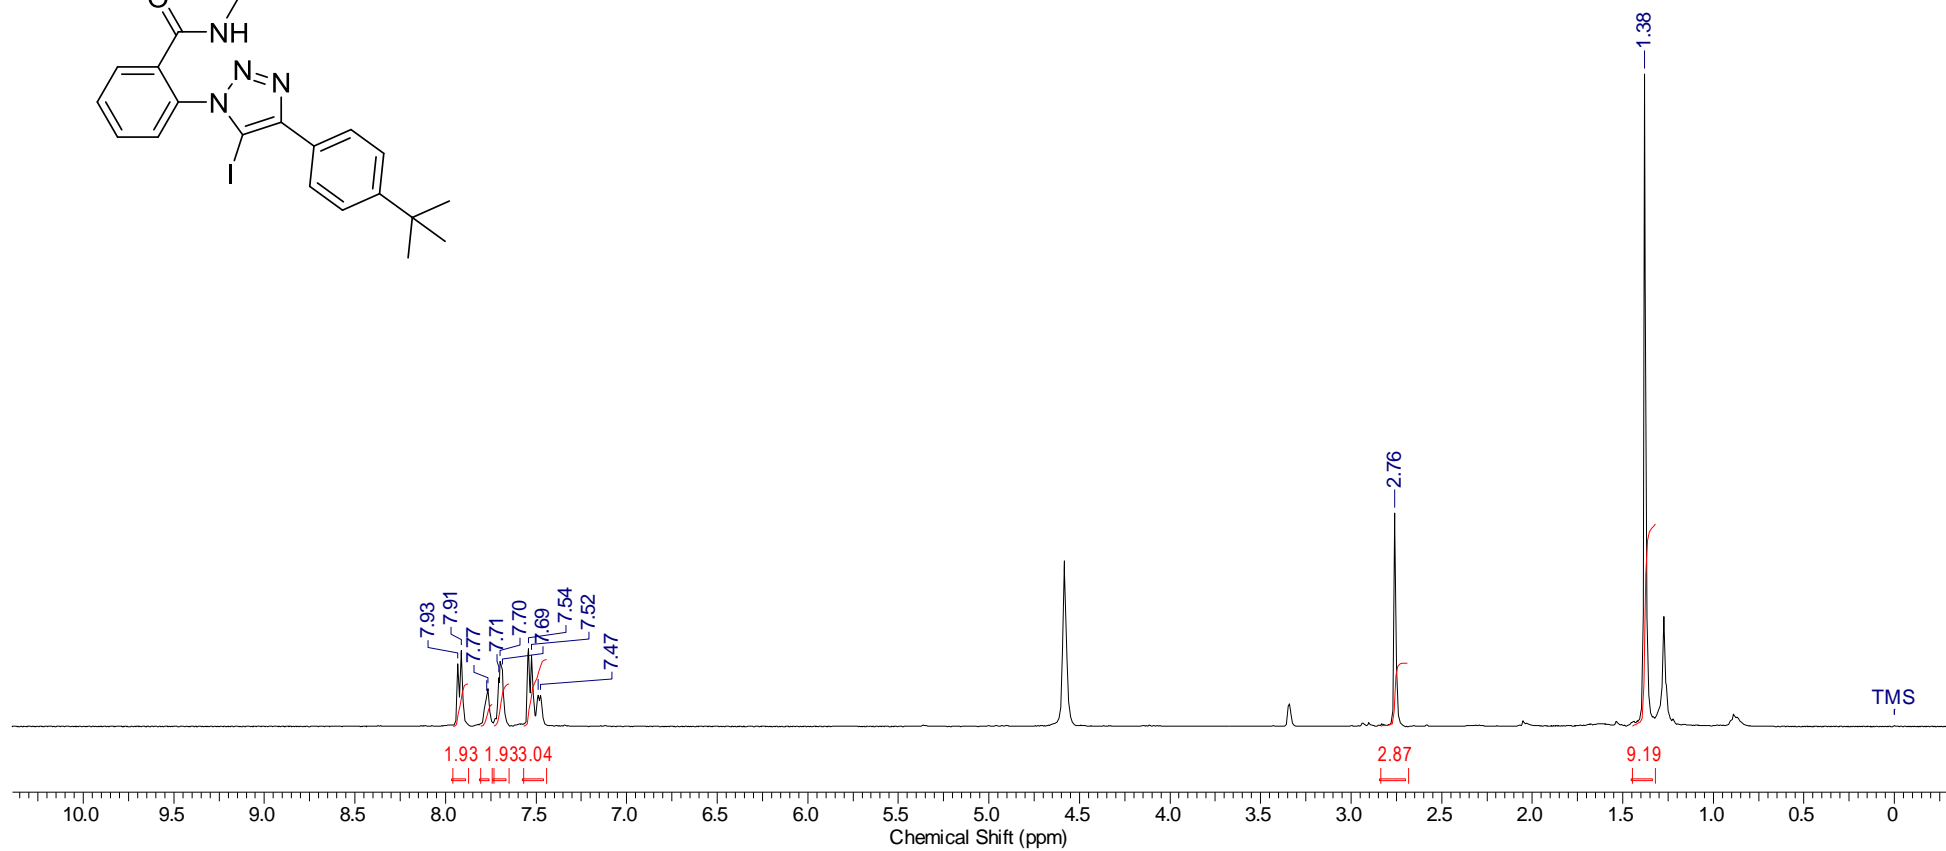

2-[4-(4-*tert*-Butylphenyl)-5-iodo-1*H*-1,2,3-triazol-1-yl]-*N*-methylbenzamide (11)

$^{13}\text{C}\{^1\text{H}\}$  NMR (100 MHz,  $\text{CDCl}_3\text{-CD}_3\text{OD}$ )

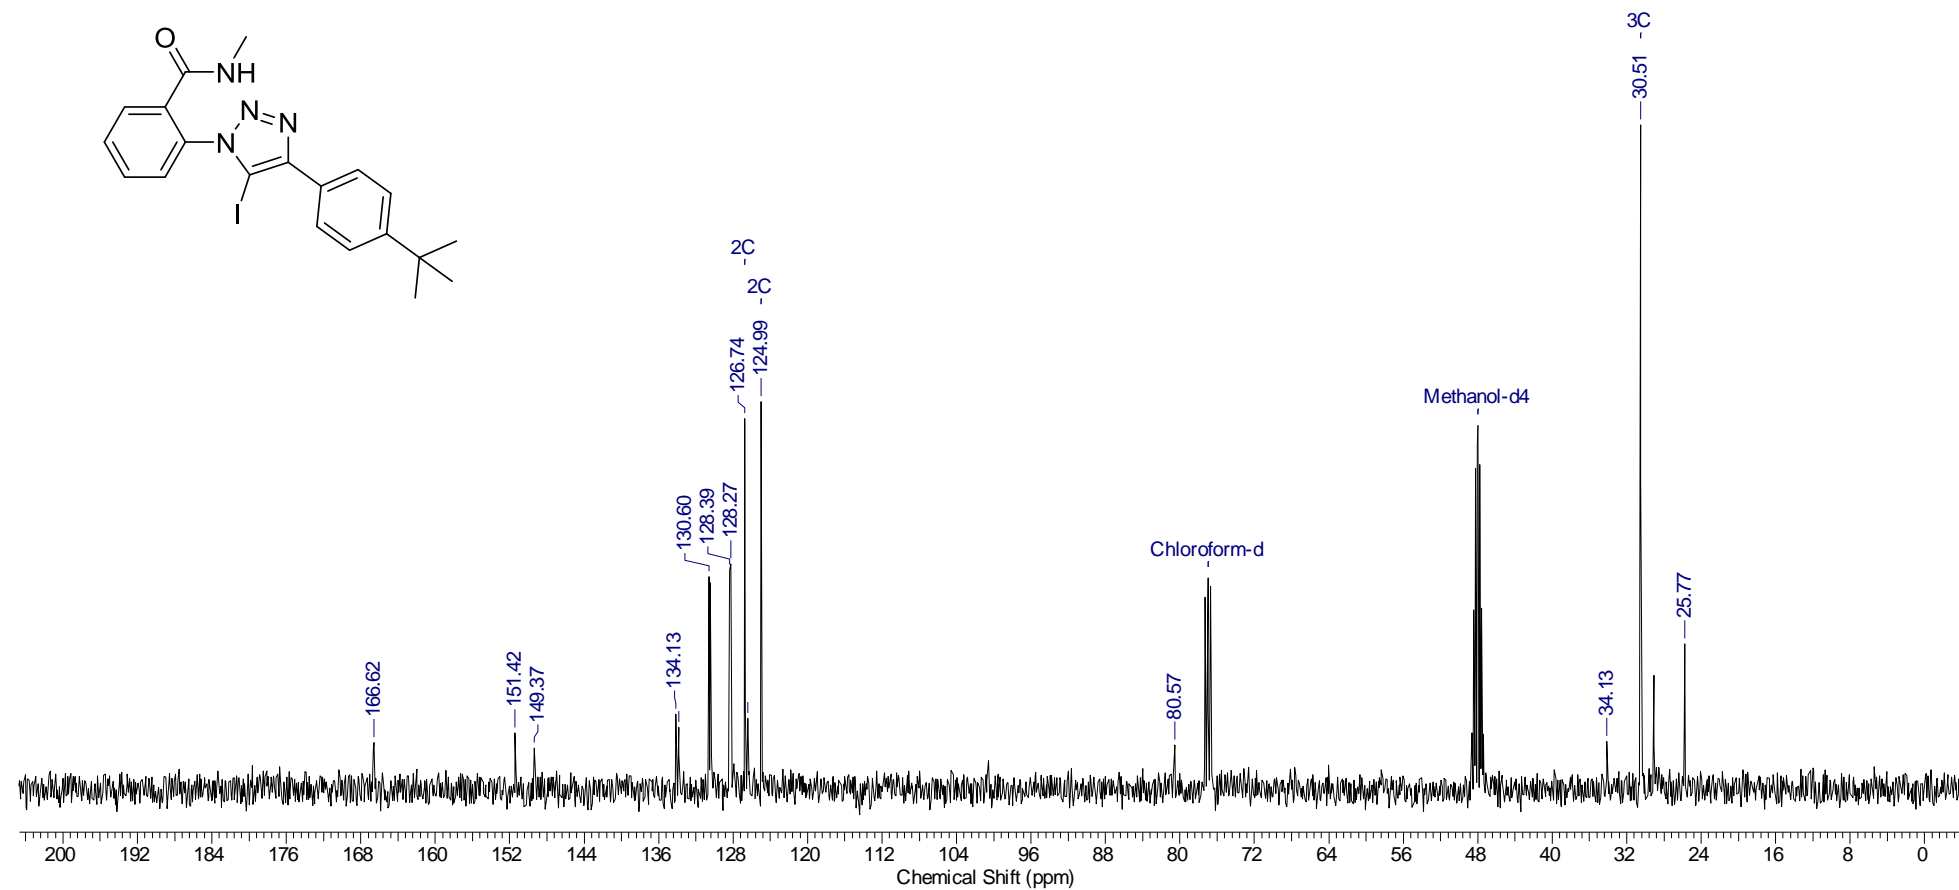

2-[5-Iodo-4-(4-methoxyphenyl)-1H-1,2,3-triazol-1-yl]-N-methylbenzamide (1m)

<sup>1</sup>H NMR (400 MHz, CDCl<sub>3</sub>-DMSO-*d*<sub>6</sub>)

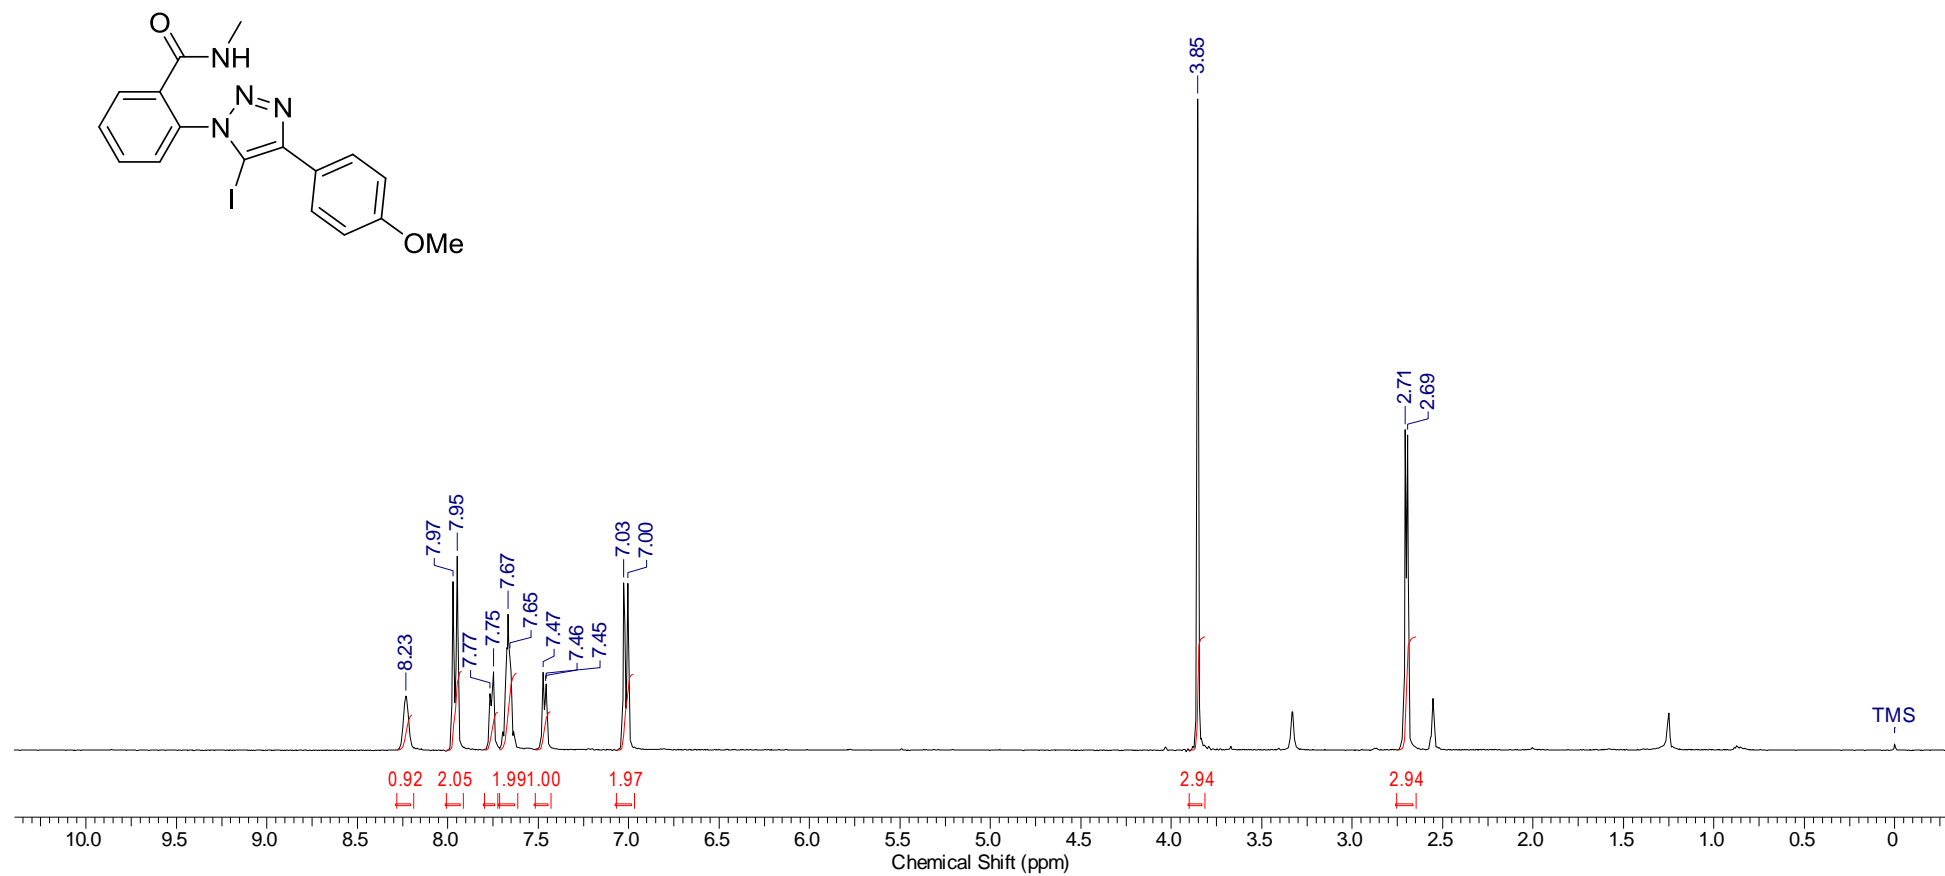

2-[5-Iodo-4-(4-methoxyphenyl)-1H-1,2,3-triazol-1-yl]-*N*-methylbenzamide (1m)

$^{13}\text{C}\{^1\text{H}\}$  NMR (100 MHz,  $\text{CDCl}_3$ - $\text{DMSO-}d_6$ )

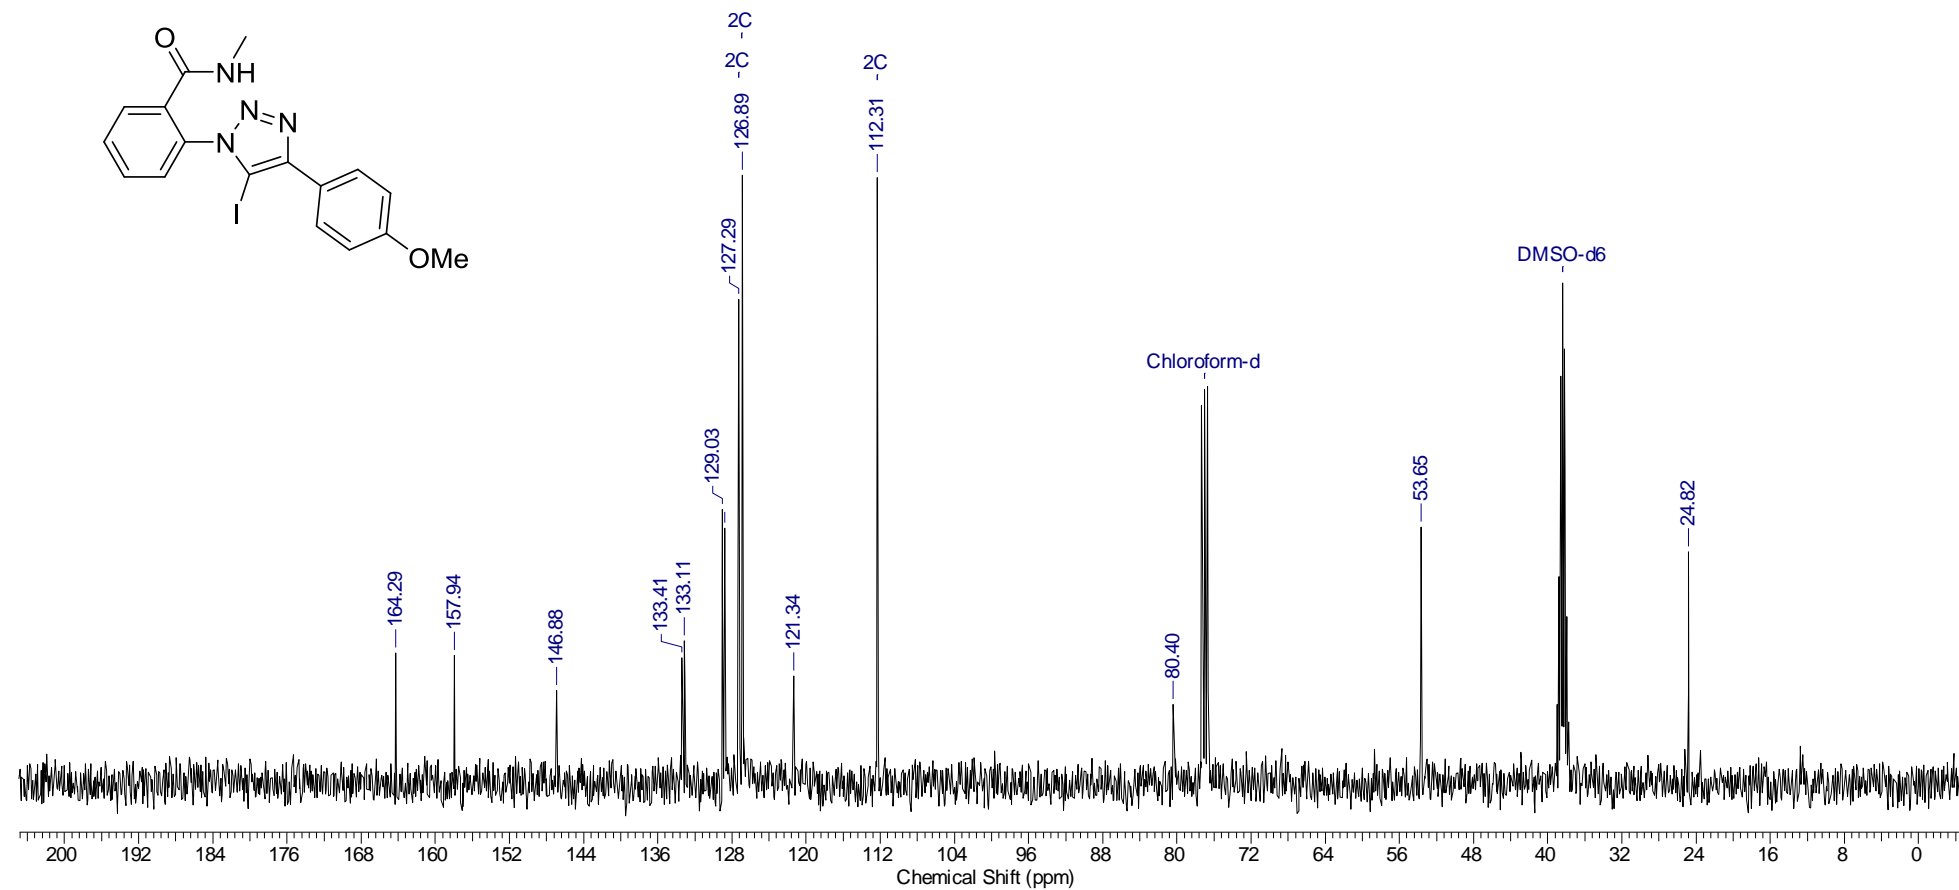

Methyl 3-(5-iodo-1-(2-[(methylamino)carbonyl]phenyl)-1H-1,2,3-triazol-4-yl)benzoate (1n)

<sup>1</sup>H NMR (400 MHz, CDCl<sub>3</sub>)

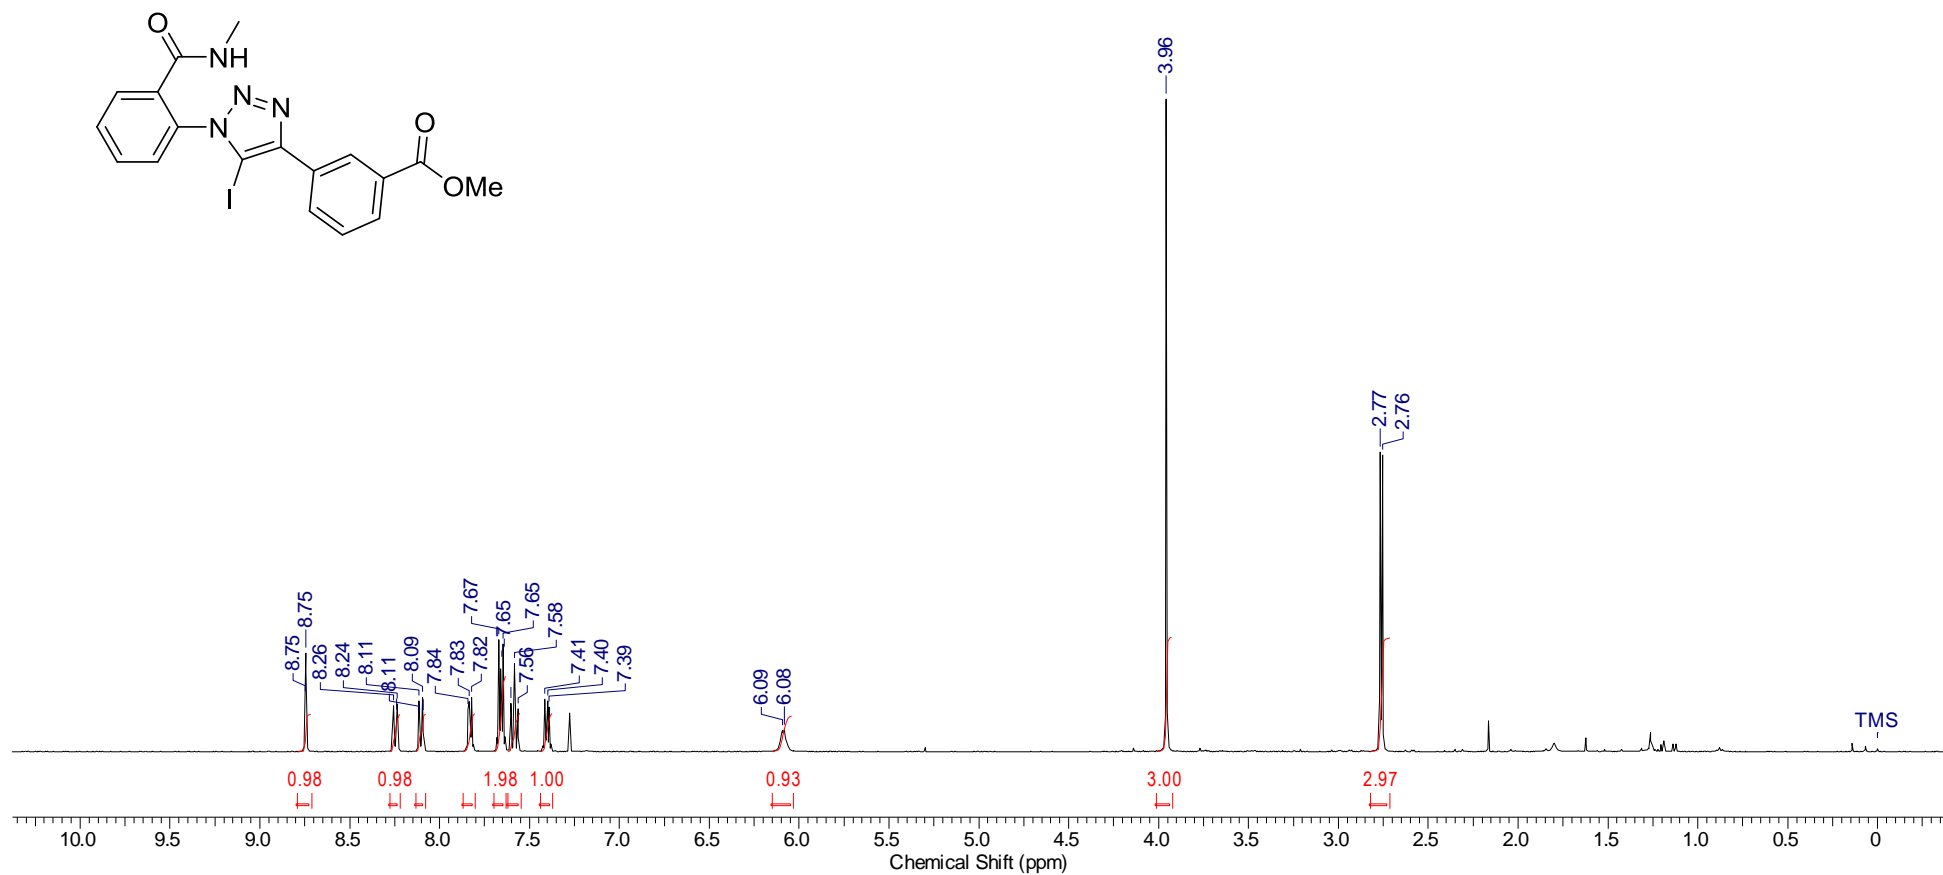

Methyl 3-(5-iodo-1-{2-[(methylamino)carbonyl]phenyl}-1*H*-1,2,3-triazol-4-yl)benzoate (1n)

$^{13}\text{C}\{^1\text{H}\}$  NMR (100 MHz,  $\text{CDCl}_3$ )

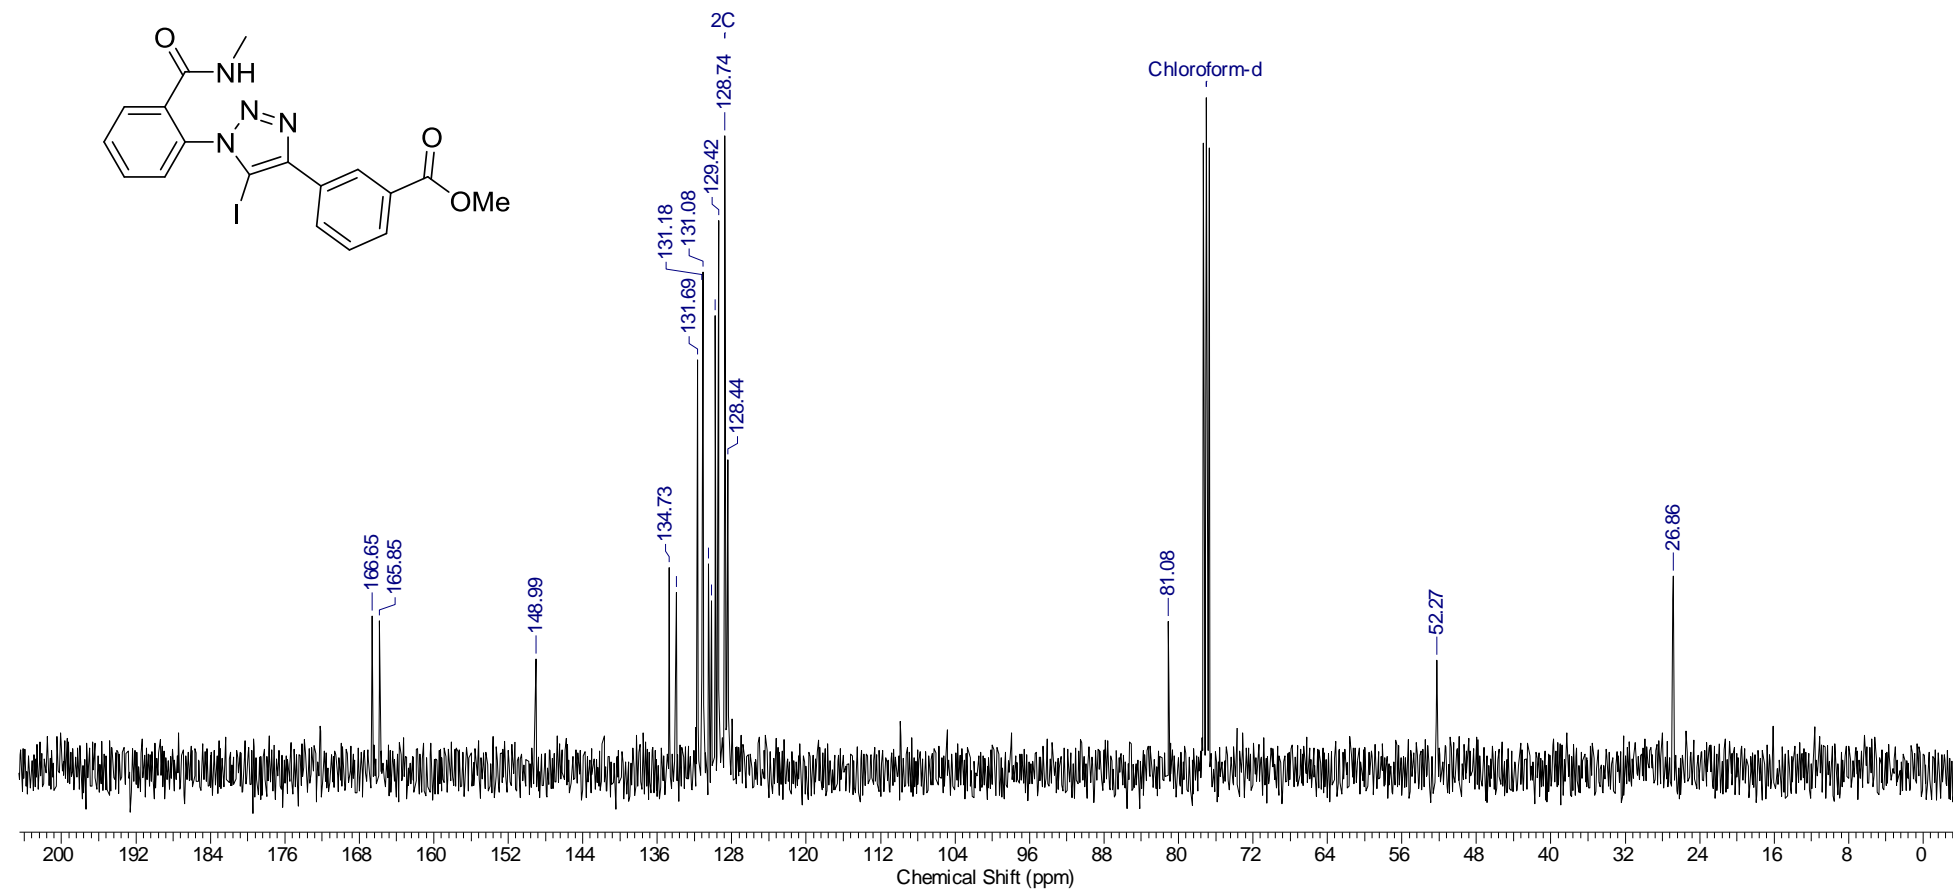

2-[4-(4-Acetylphenyl)-5-iodo-1*H*-1,2,3-triazol-1-yl]-*N*-methylbenzamide (1o)

<sup>1</sup>H NMR (400 MHz, CDCl<sub>3</sub>)

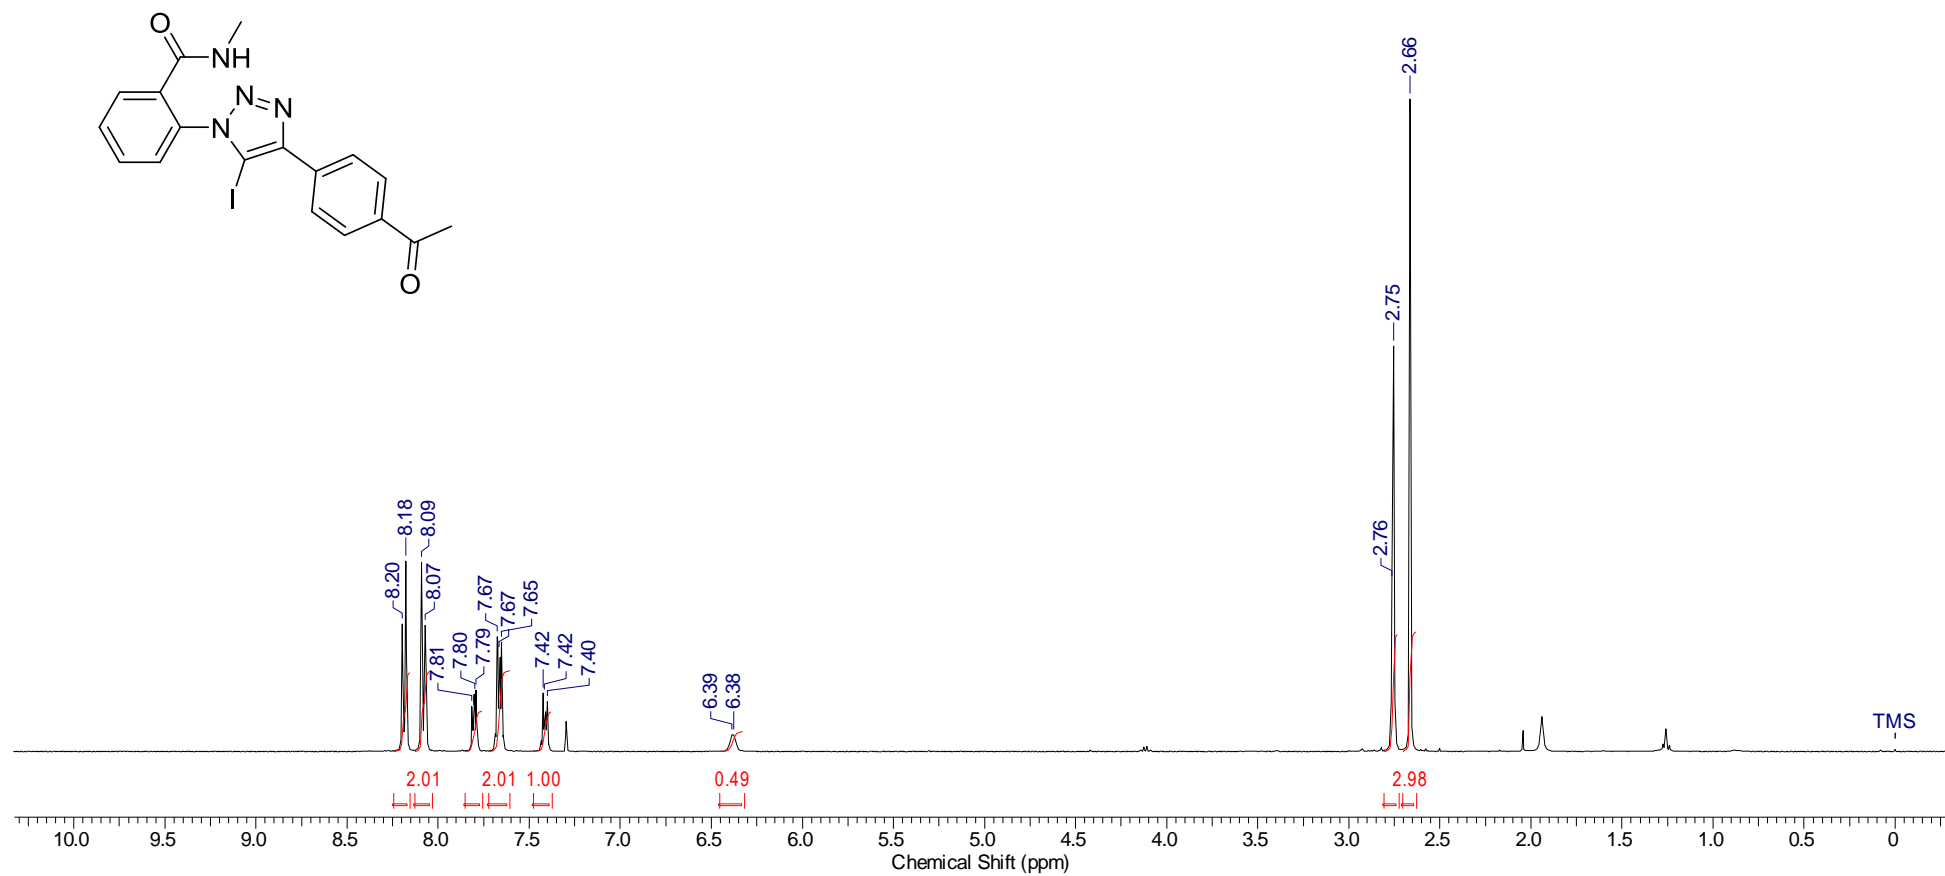

2-[4-(4-Acetylphenyl)-5-iodo-1H-1,2,3-triazol-1-yl]-N-methylbenzamide (1o)

$^{13}\text{C}\{^1\text{H}\}$  NMR (100 MHz,  $\text{CDCl}_3$ )

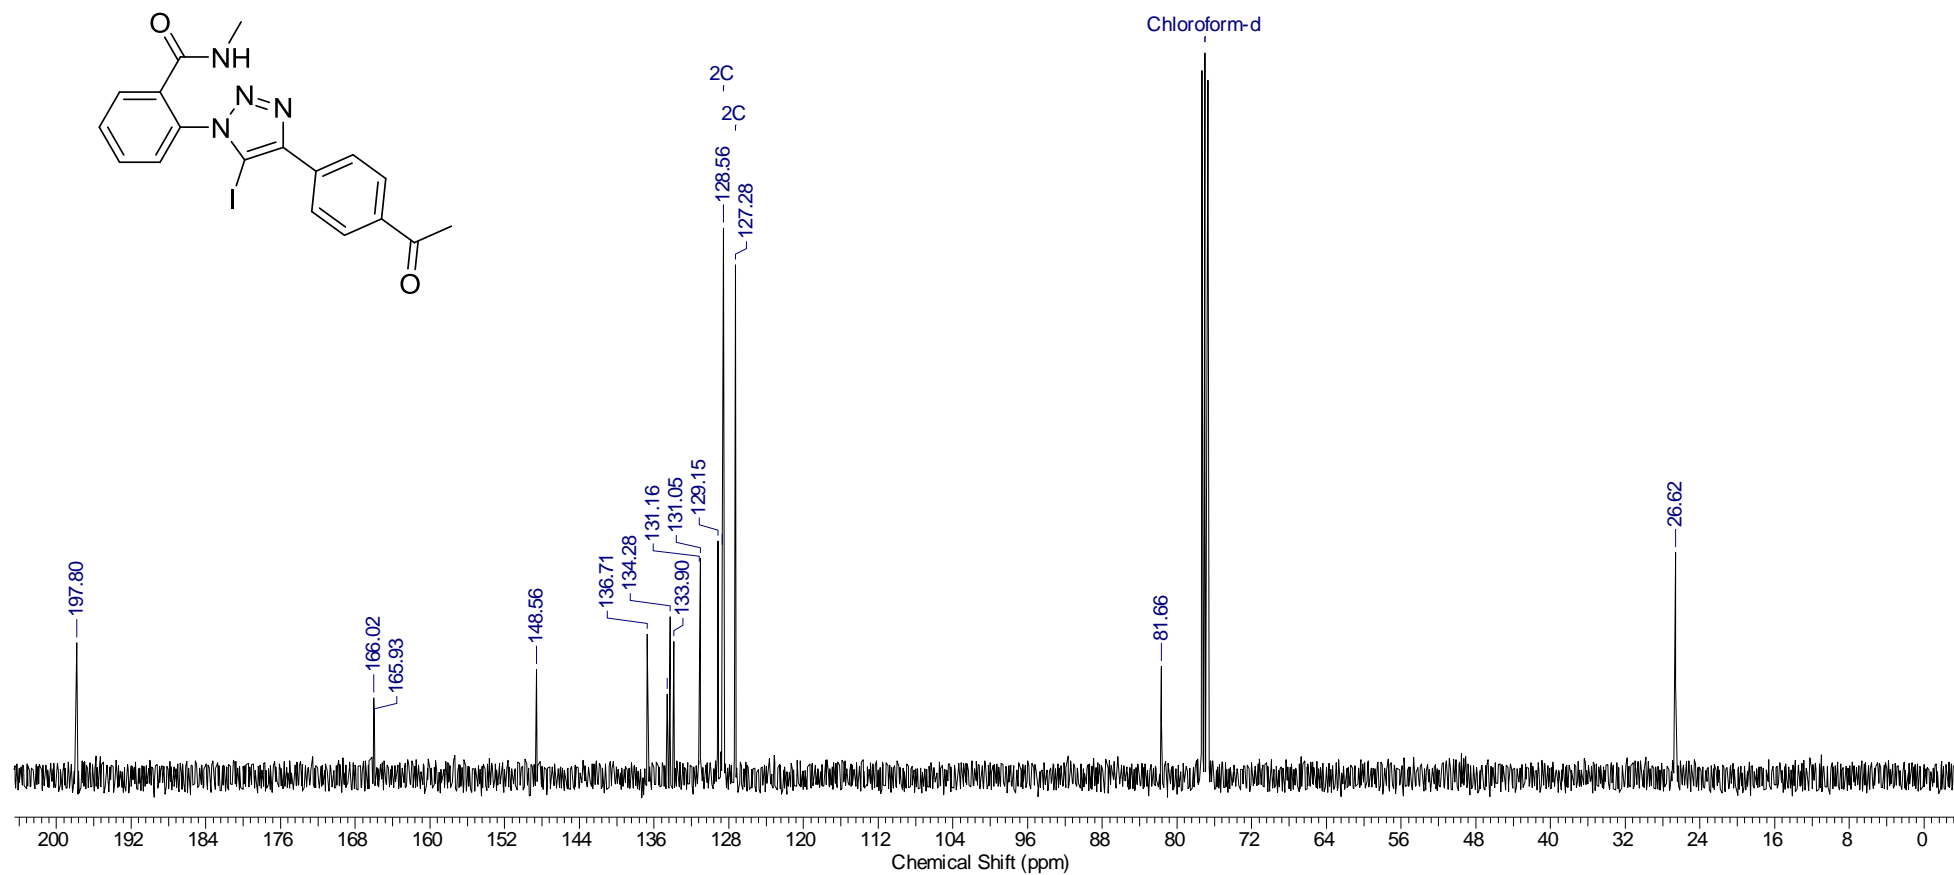



2-(4-Butyl-5-iodo-1*H*-1,2,3-triazol-1-yl)benzamide (1p)

<sup>1</sup>H NMR (400 MHz, CDCl<sub>3</sub>)

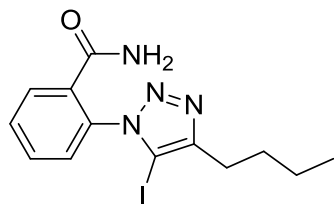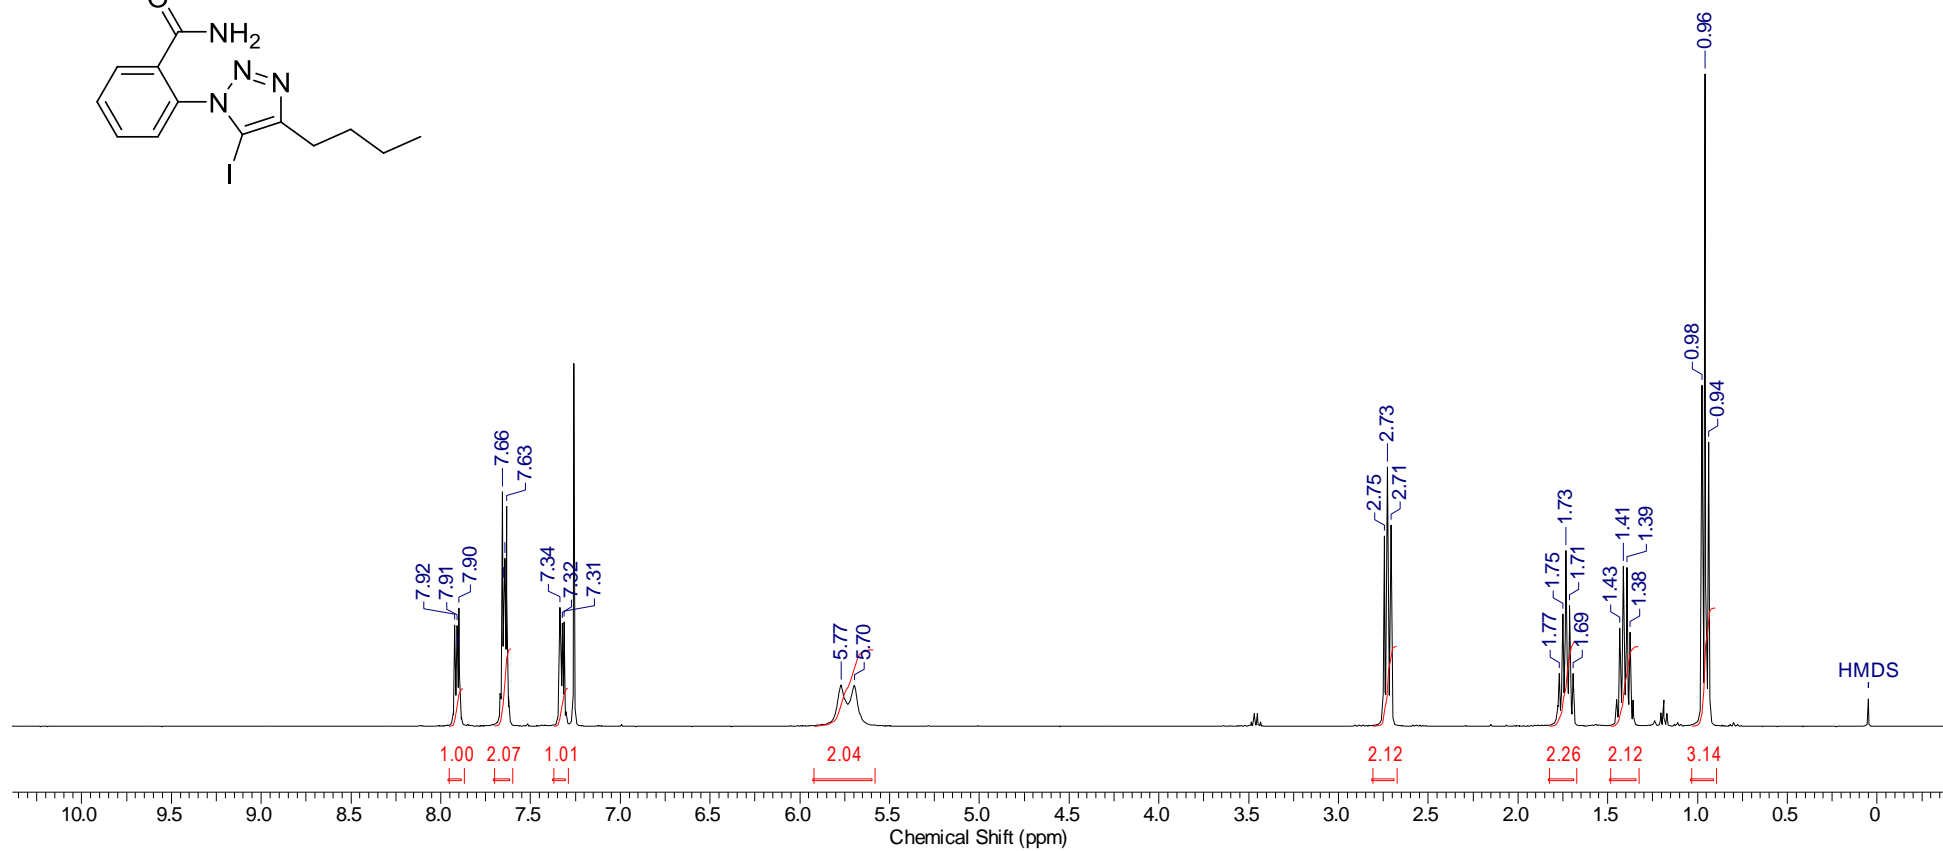

2-(4-Butyl-5-iodo-1*H*-1,2,3-triazol-1-yl)benzamide (1p)

$^{13}\text{C}\{^1\text{H}\}$  NMR (100 MHz,  $\text{CDCl}_3$ )

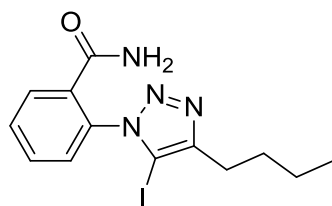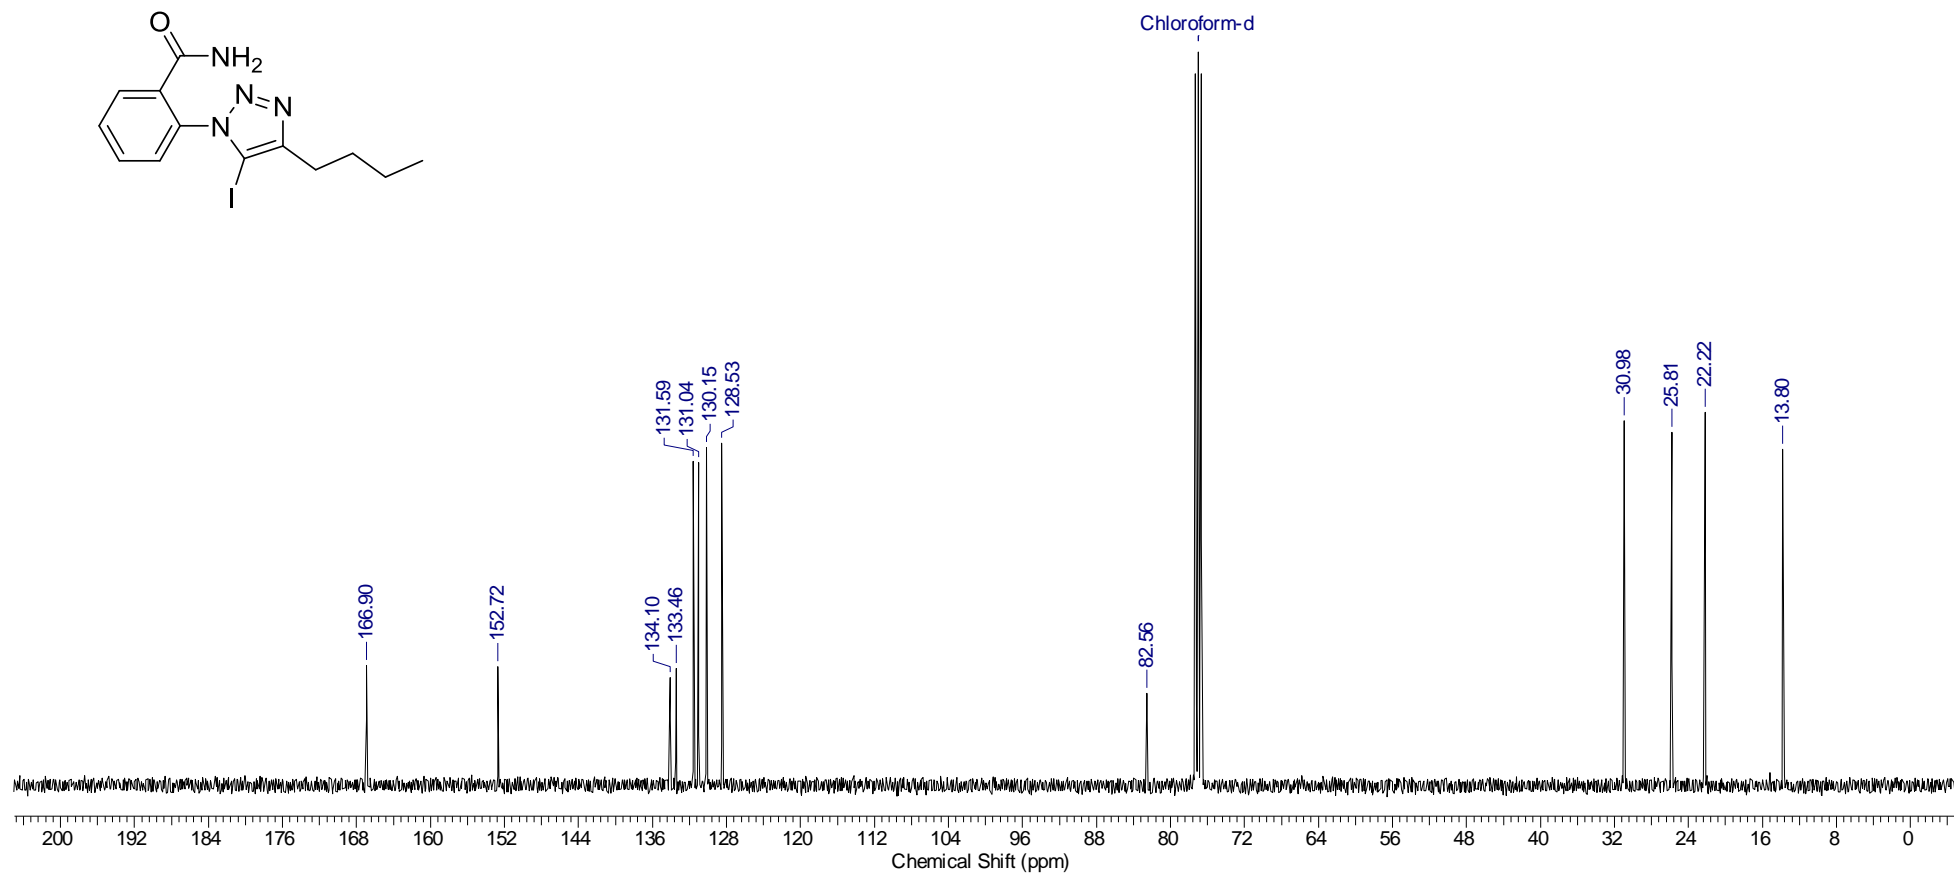

2-(4-Butyl-5-iodo-1H-1,2,3-triazol-1-yl)-N-(4-methylphenyl)benzamide (1q)

<sup>1</sup>H NMR (400 MHz, CDCl<sub>3</sub>)

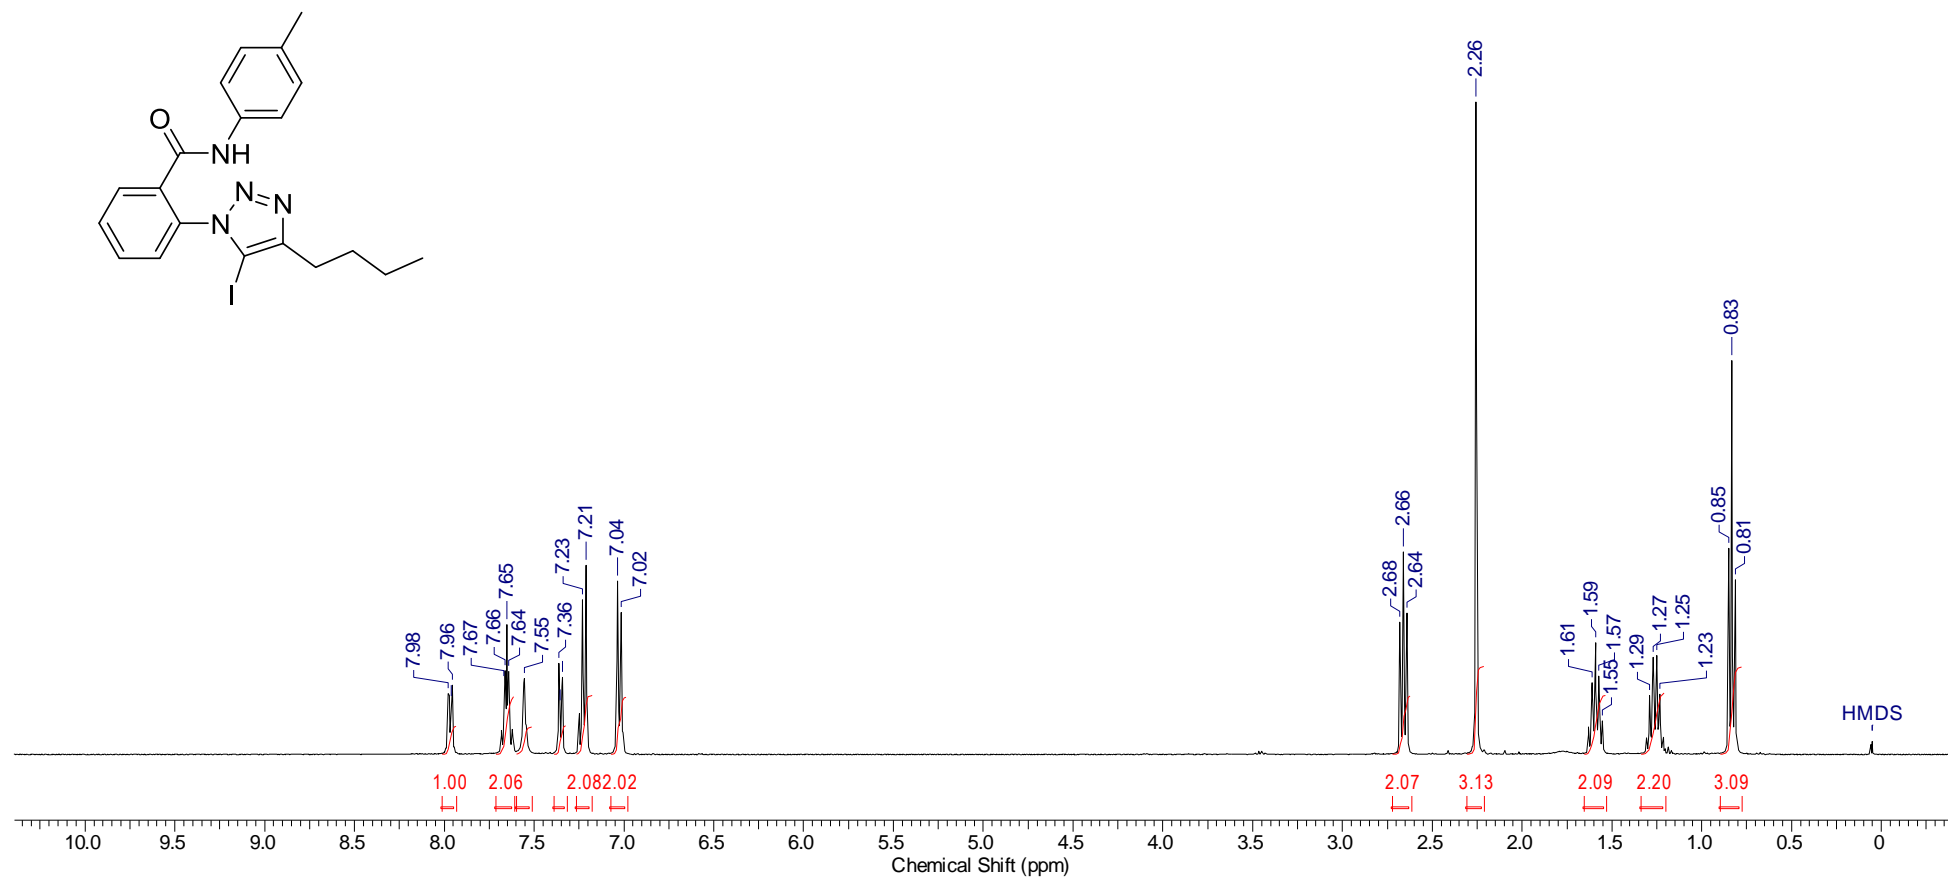

2-(4-Butyl-5-iodo-1*H*-1,2,3-triazol-1-yl)-*N*-(4-methylphenyl)benzamide (1q)

$^{13}\text{C}\{^1\text{H}\}$  NMR (100 MHz,  $\text{CDCl}_3$ )

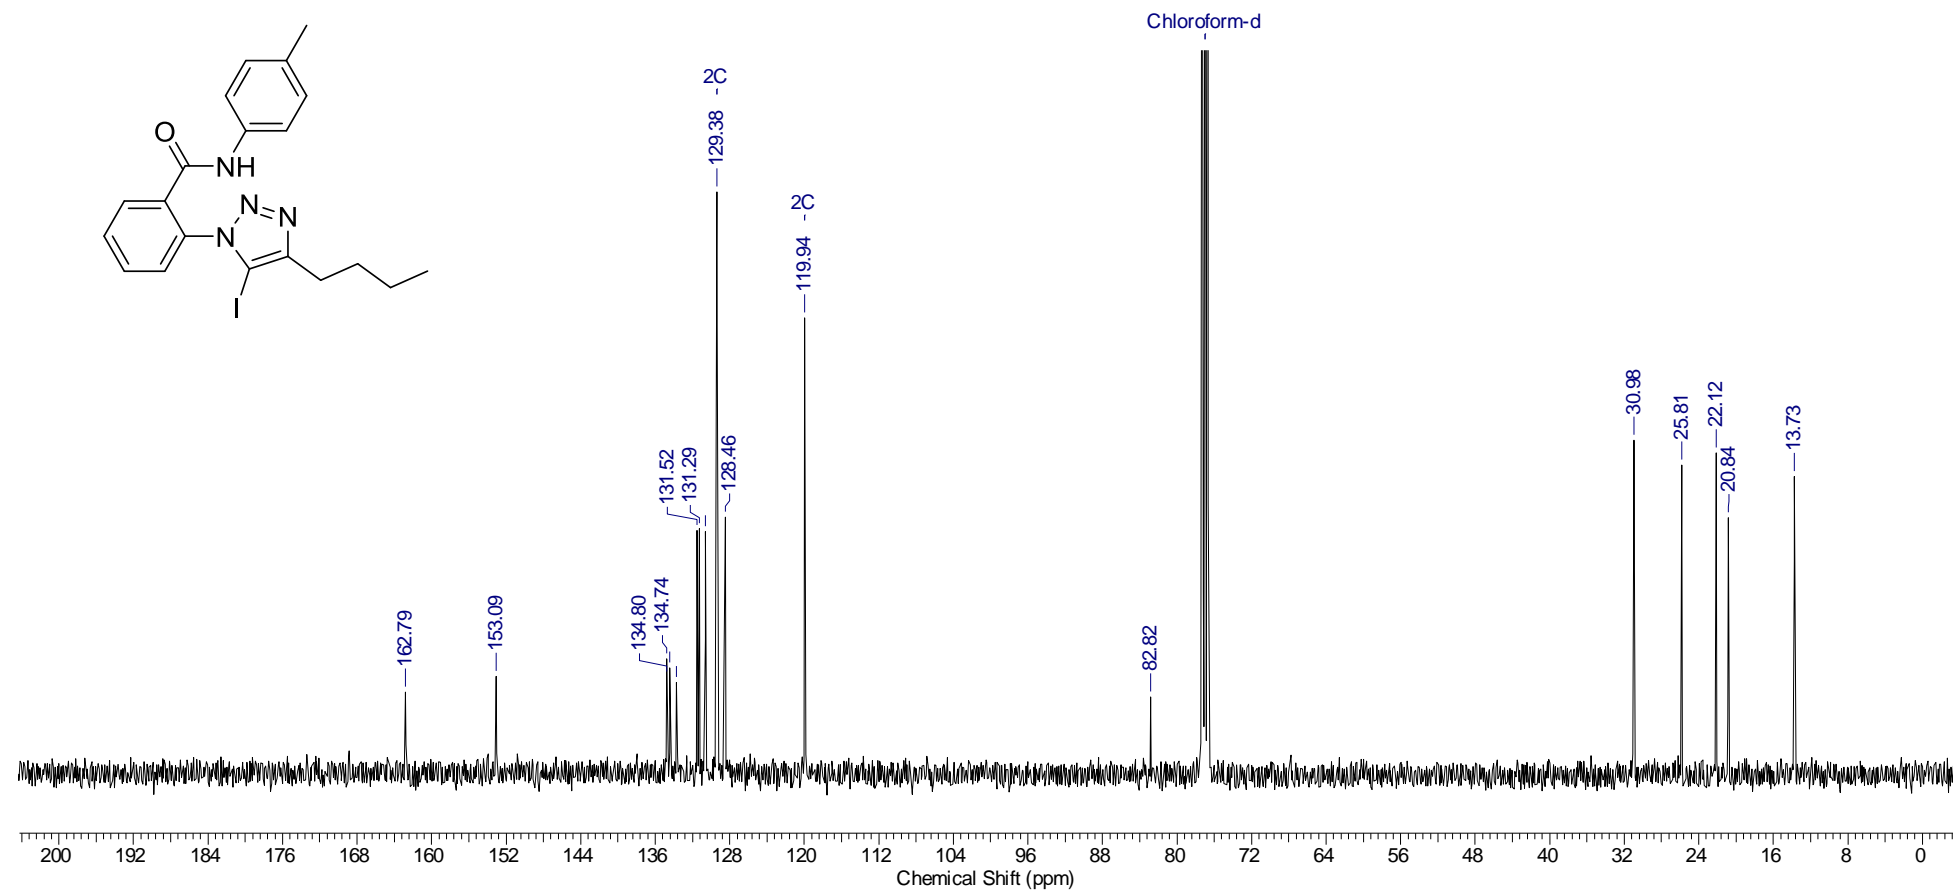

2-(4-Butyl-5-iodo-1H-1,2,3-triazol-1-yl)-N-(4-methoxyphenyl)benzamide (1r)

<sup>1</sup>H NMR (400 MHz, CDCl<sub>3</sub>)

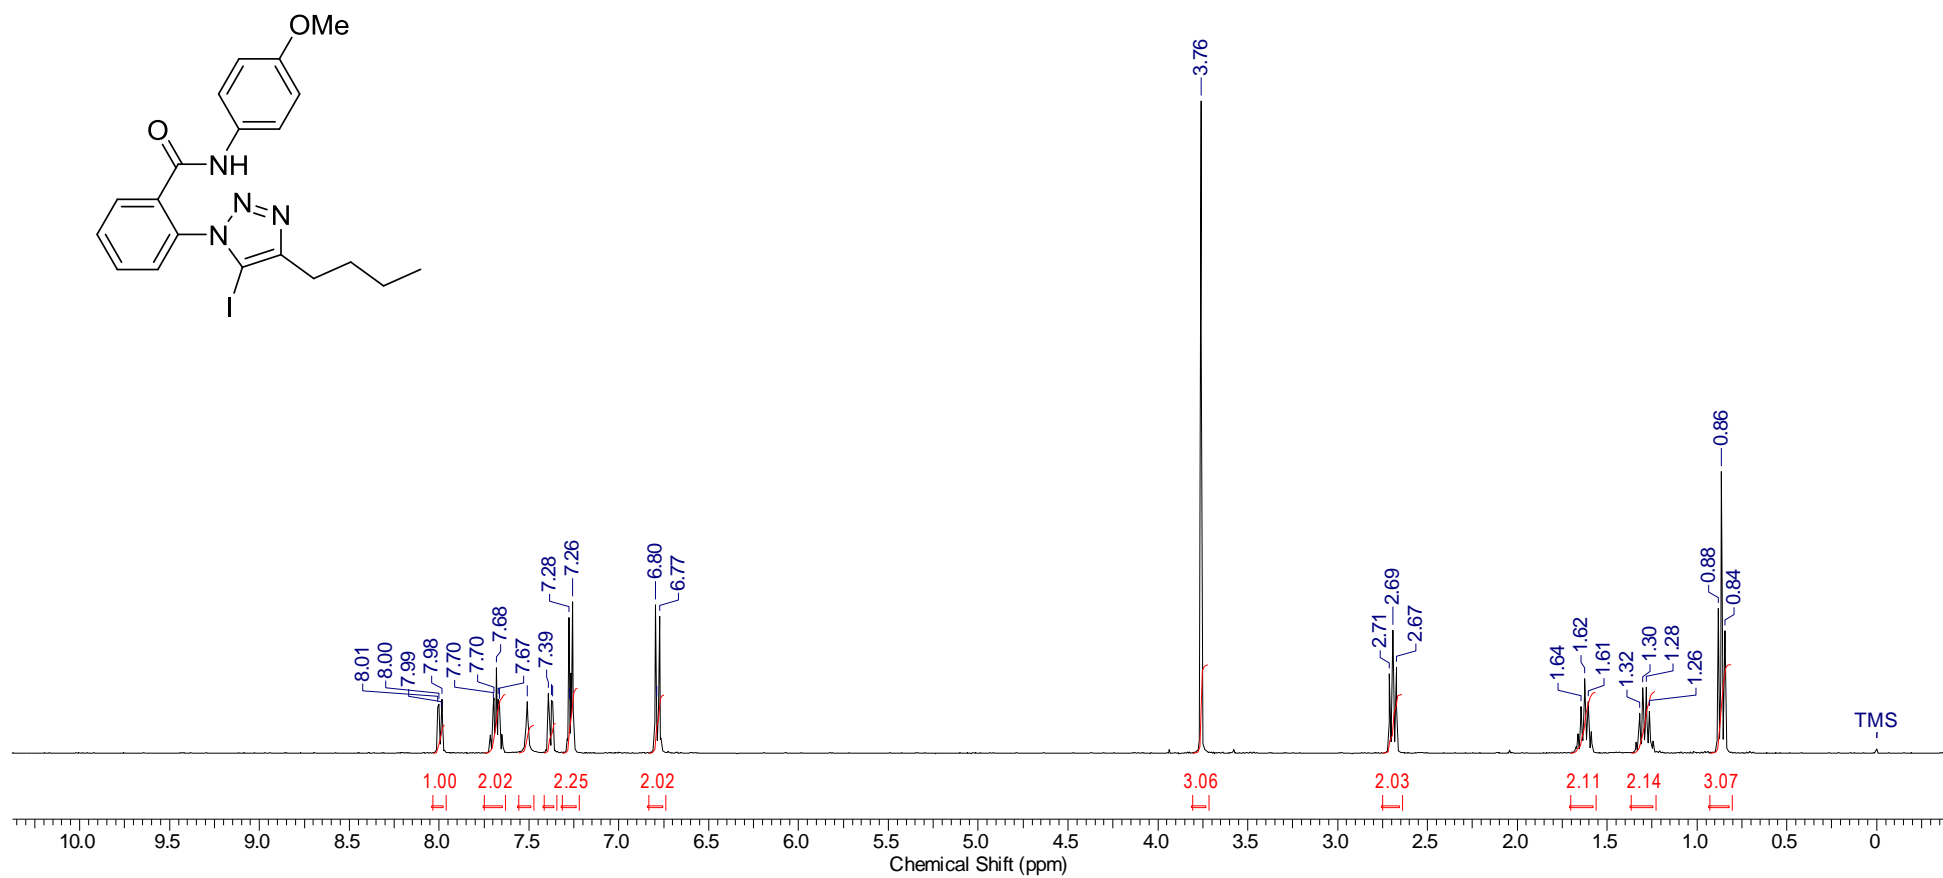

2-(4-Butyl-5-iodo-1*H*-1,2,3-triazol-1-yl)-*N*-(4-methoxyphenyl)benzamide (1r)

$^{13}\text{C}\{^1\text{H}\}$  NMR (100 MHz,  $\text{CDCl}_3$ )

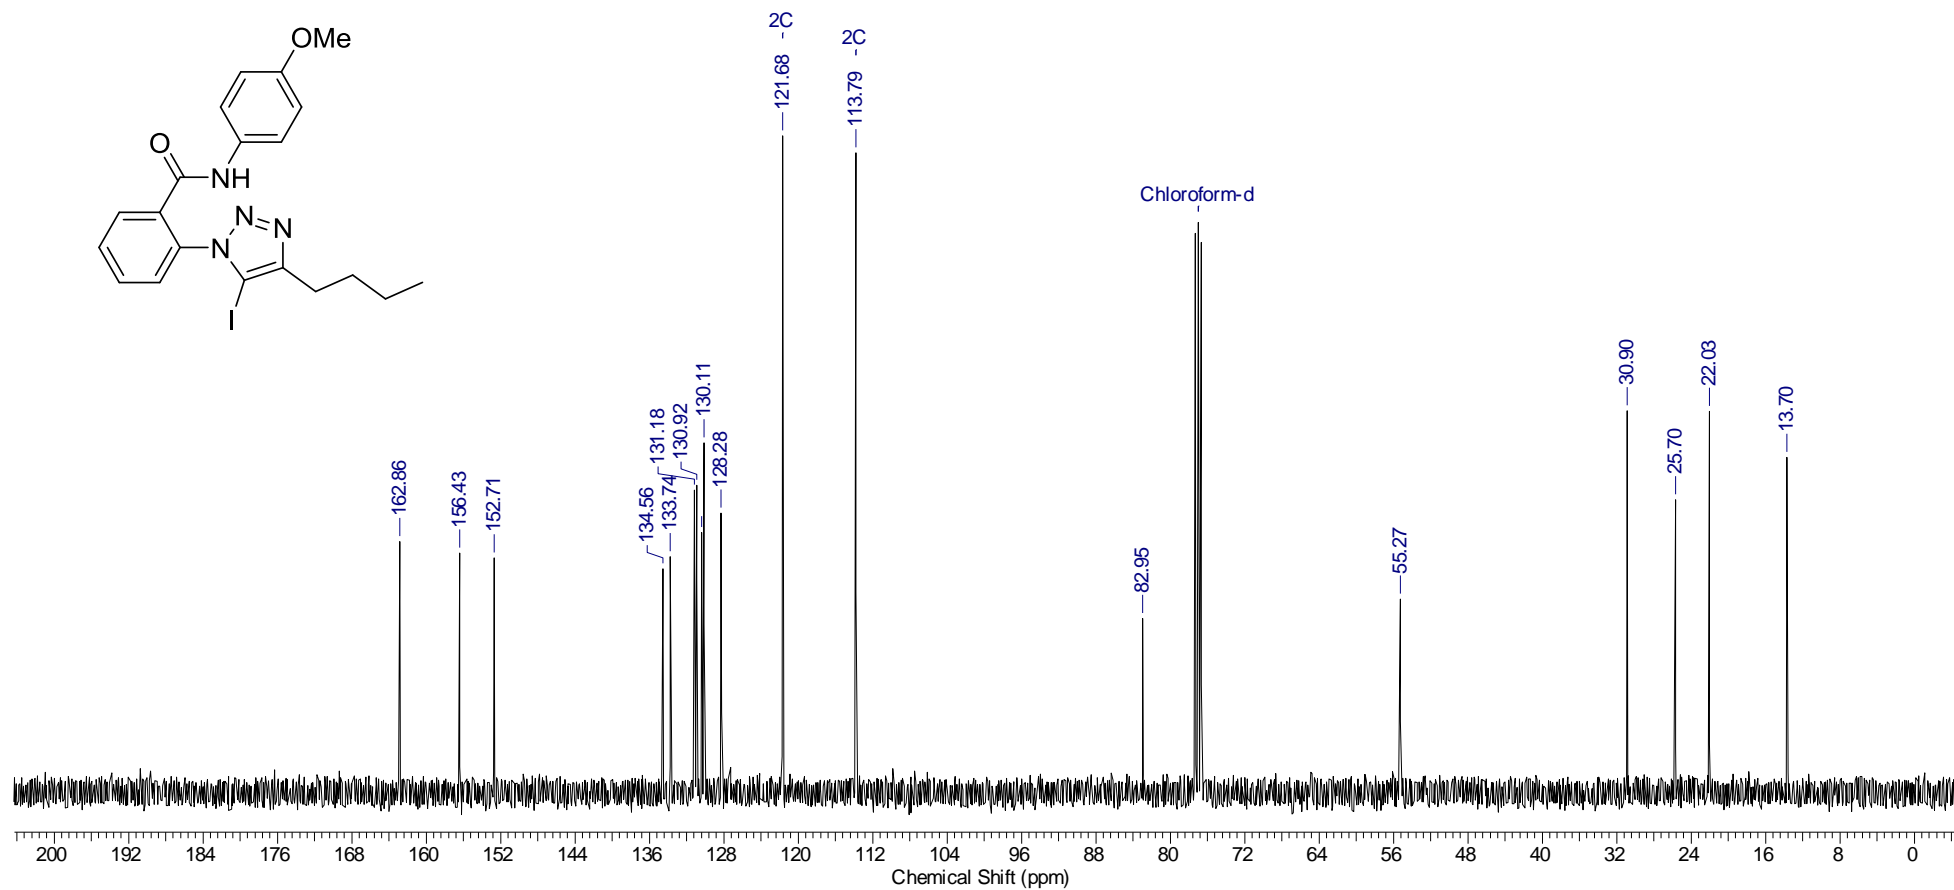

2-(4-Butyl-5-iodo-1*H*-1,2,3-triazol-1-yl)-*N*-cyclopropylbenzamide (1s)

<sup>1</sup>H NMR (600 MHz, CDCl<sub>3</sub>)

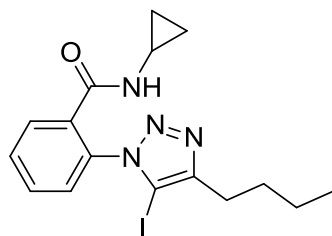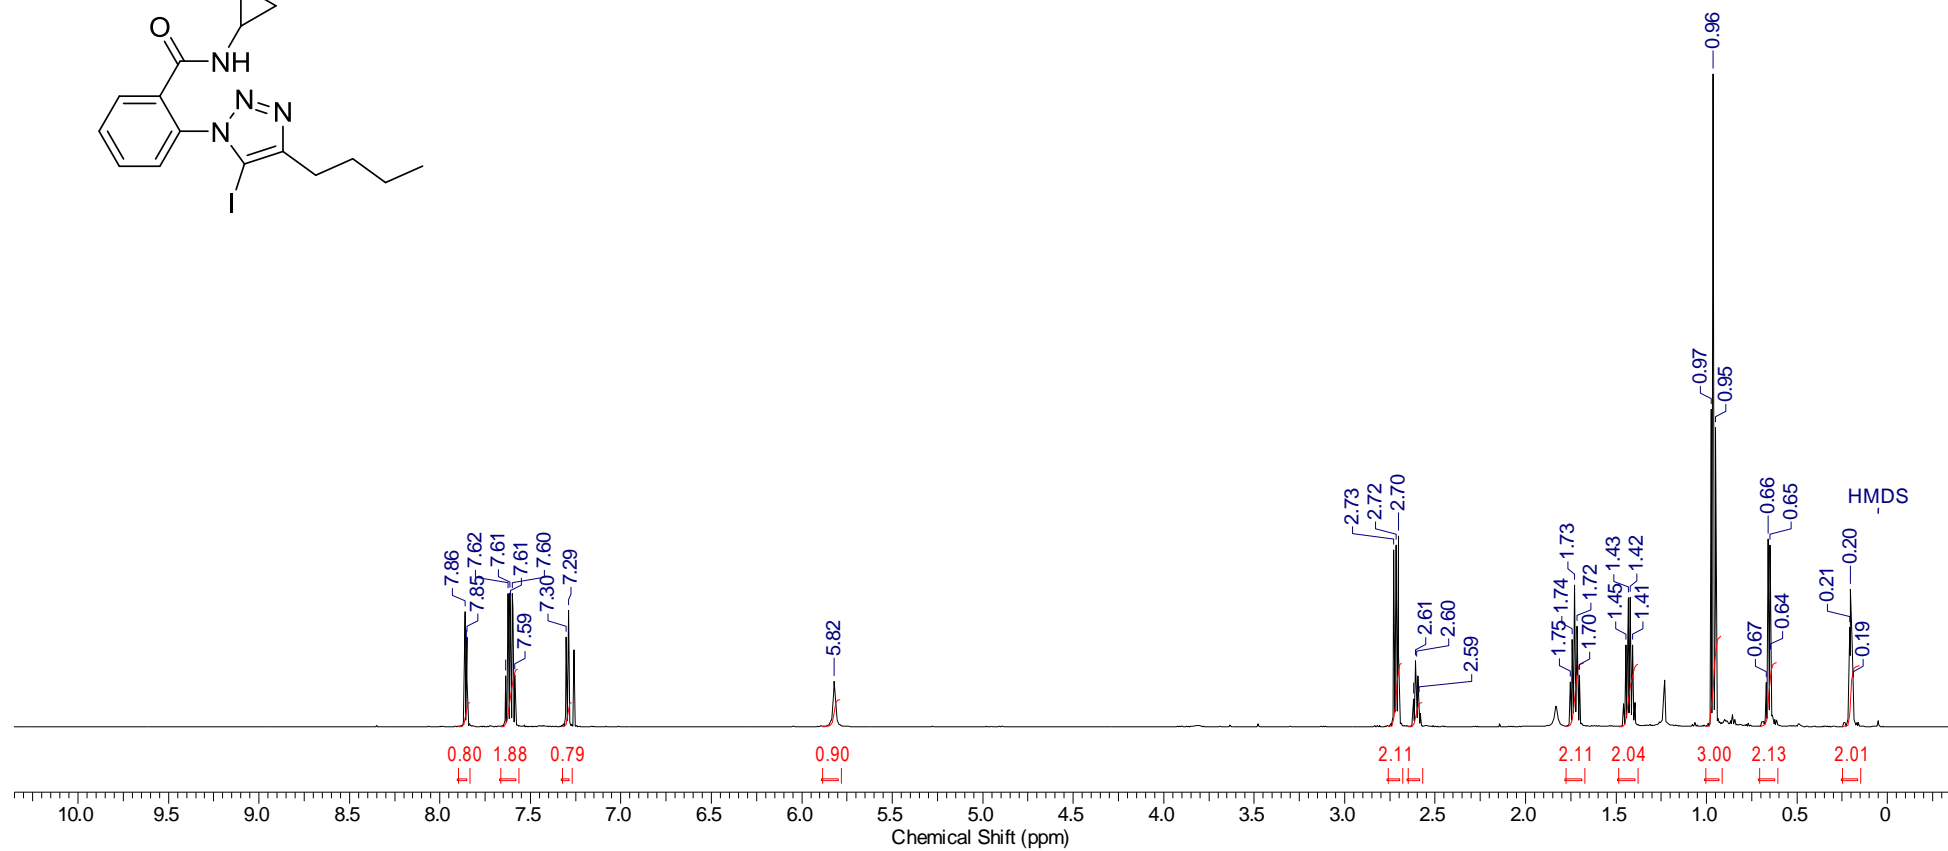

2-(4-Butyl-5-iodo-1*H*-1,2,3-triazol-1-yl)-*N*-cyclopropylbenzamide (1s)

$^{13}\text{C}\{^1\text{H}\}$  NMR (151 MHz,  $\text{CDCl}_3$ )

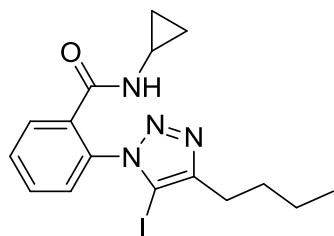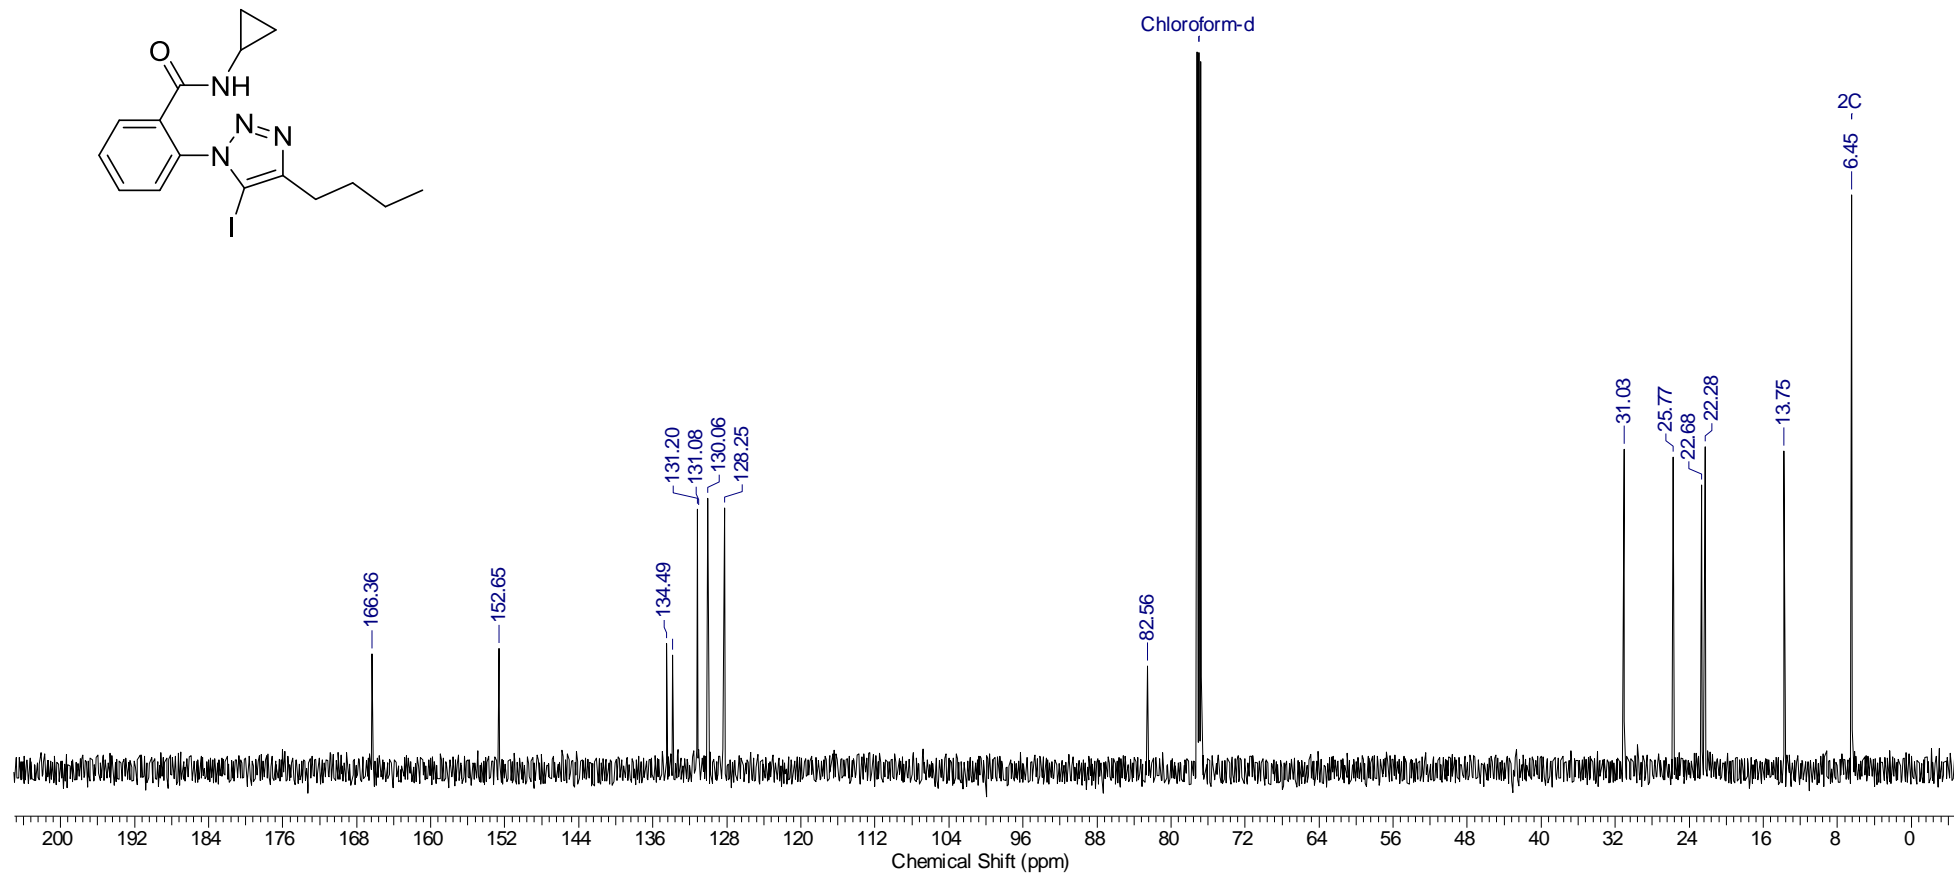



2-(4-Butyl-5-iodo-1H-1,2,3-triazol-1-yl)-N-cyclohexylbenzamide (1t)

<sup>1</sup>H NMR (400 MHz, CDCl<sub>3</sub>)

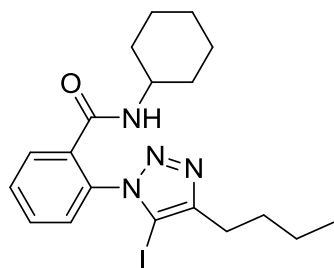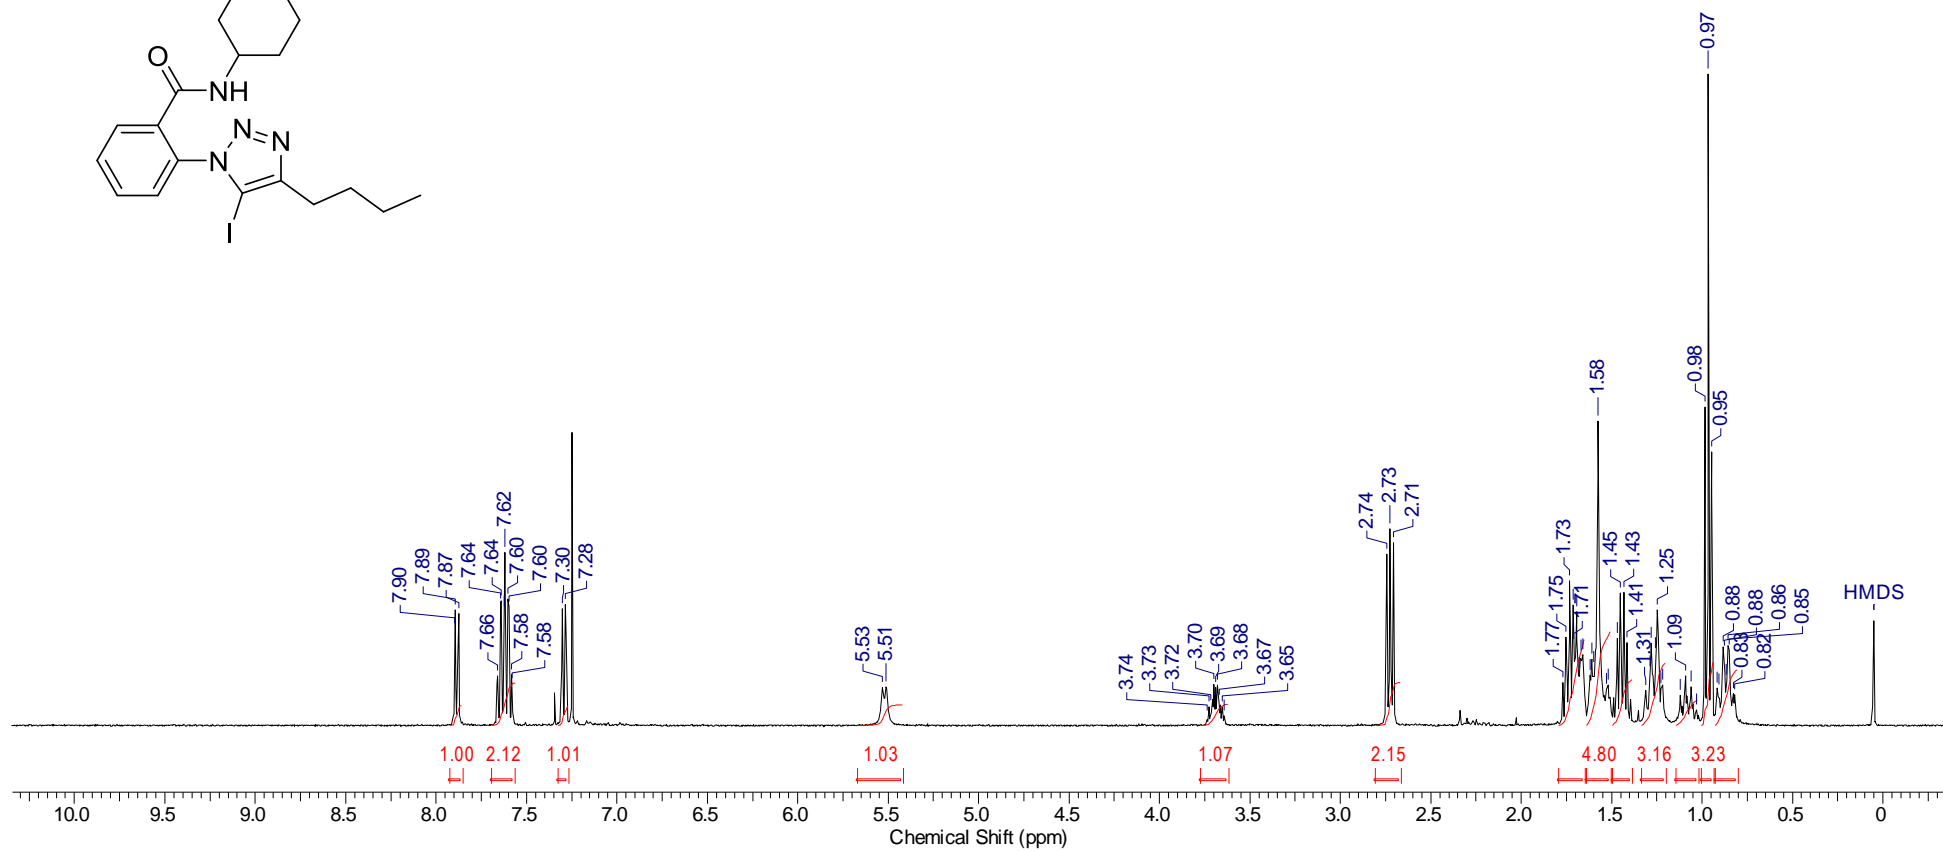

2-(4-Butyl-5-iodo-1H-1,2,3-triazol-1-yl)-N-cyclohexylbenzamide (1t)

$^{13}\text{C}\{^1\text{H}\}$  NMR (100 MHz,  $\text{CDCl}_3$ )

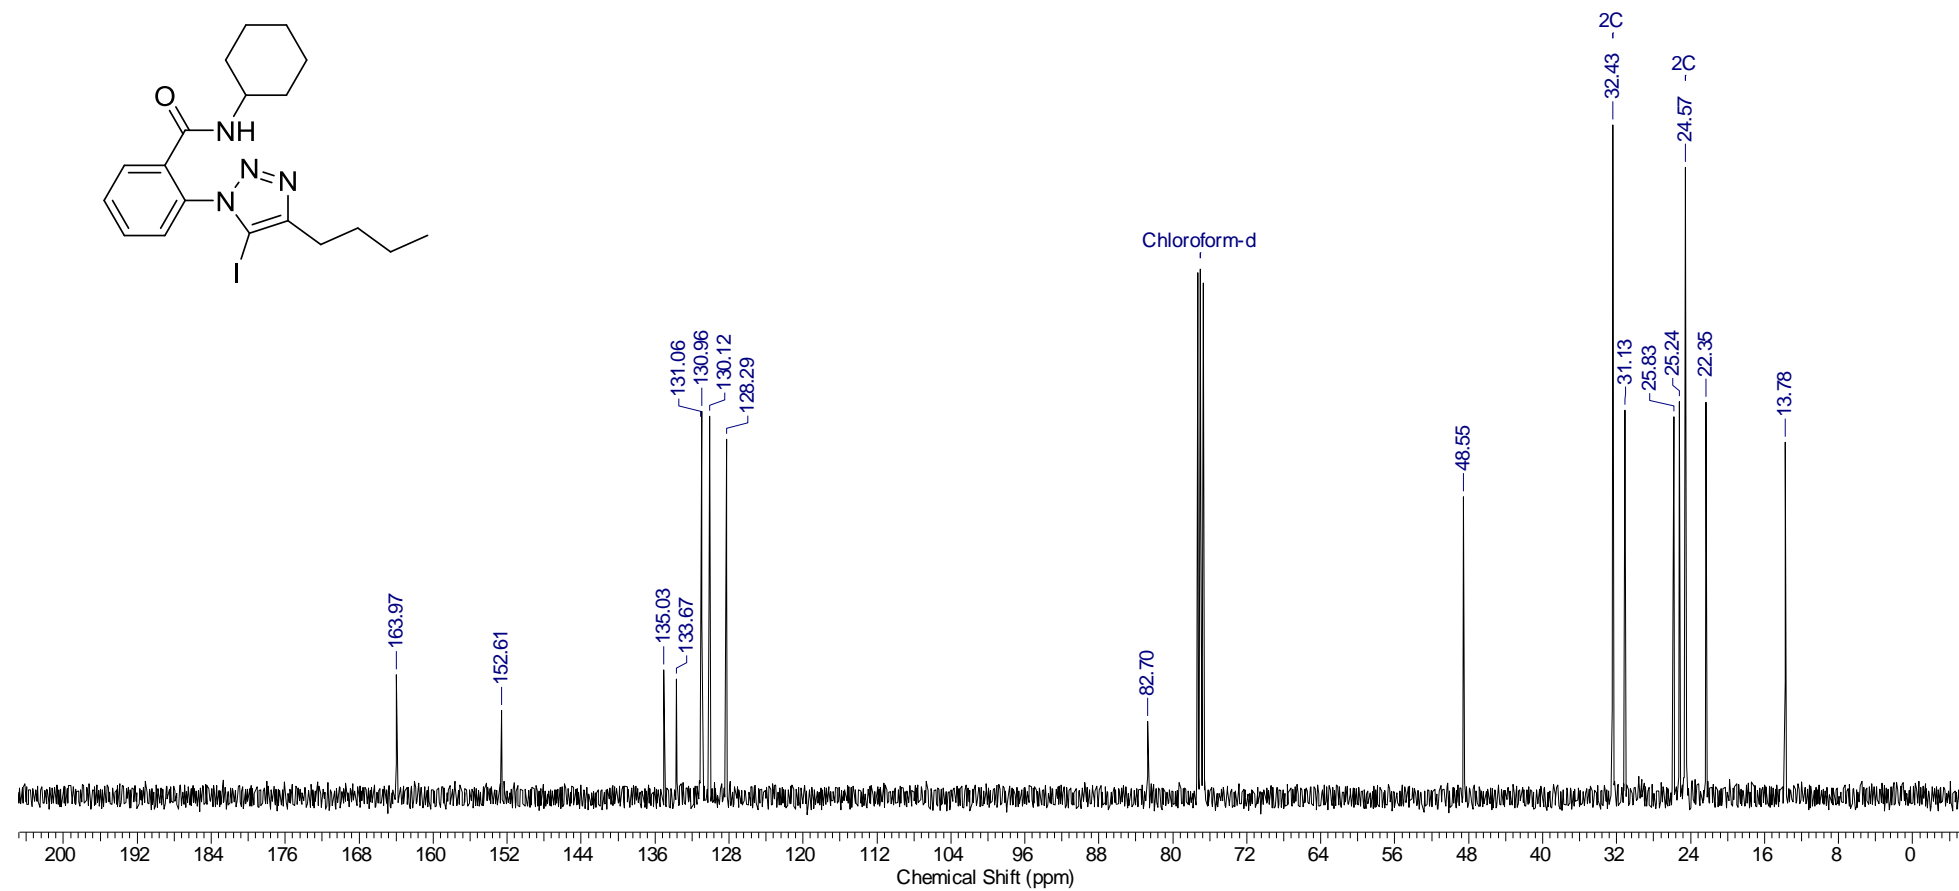

2-(4-Butyl-5-iodo-1*H*-1,2,3-triazol-1-yl)-*N*-[(1*R*)-1-phenylethyl]benzamide (1u)

<sup>1</sup>H NMR (600 MHz, CDCl<sub>3</sub>)

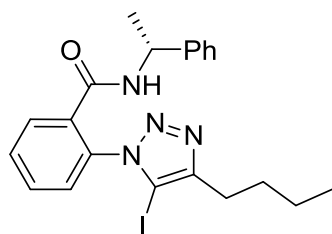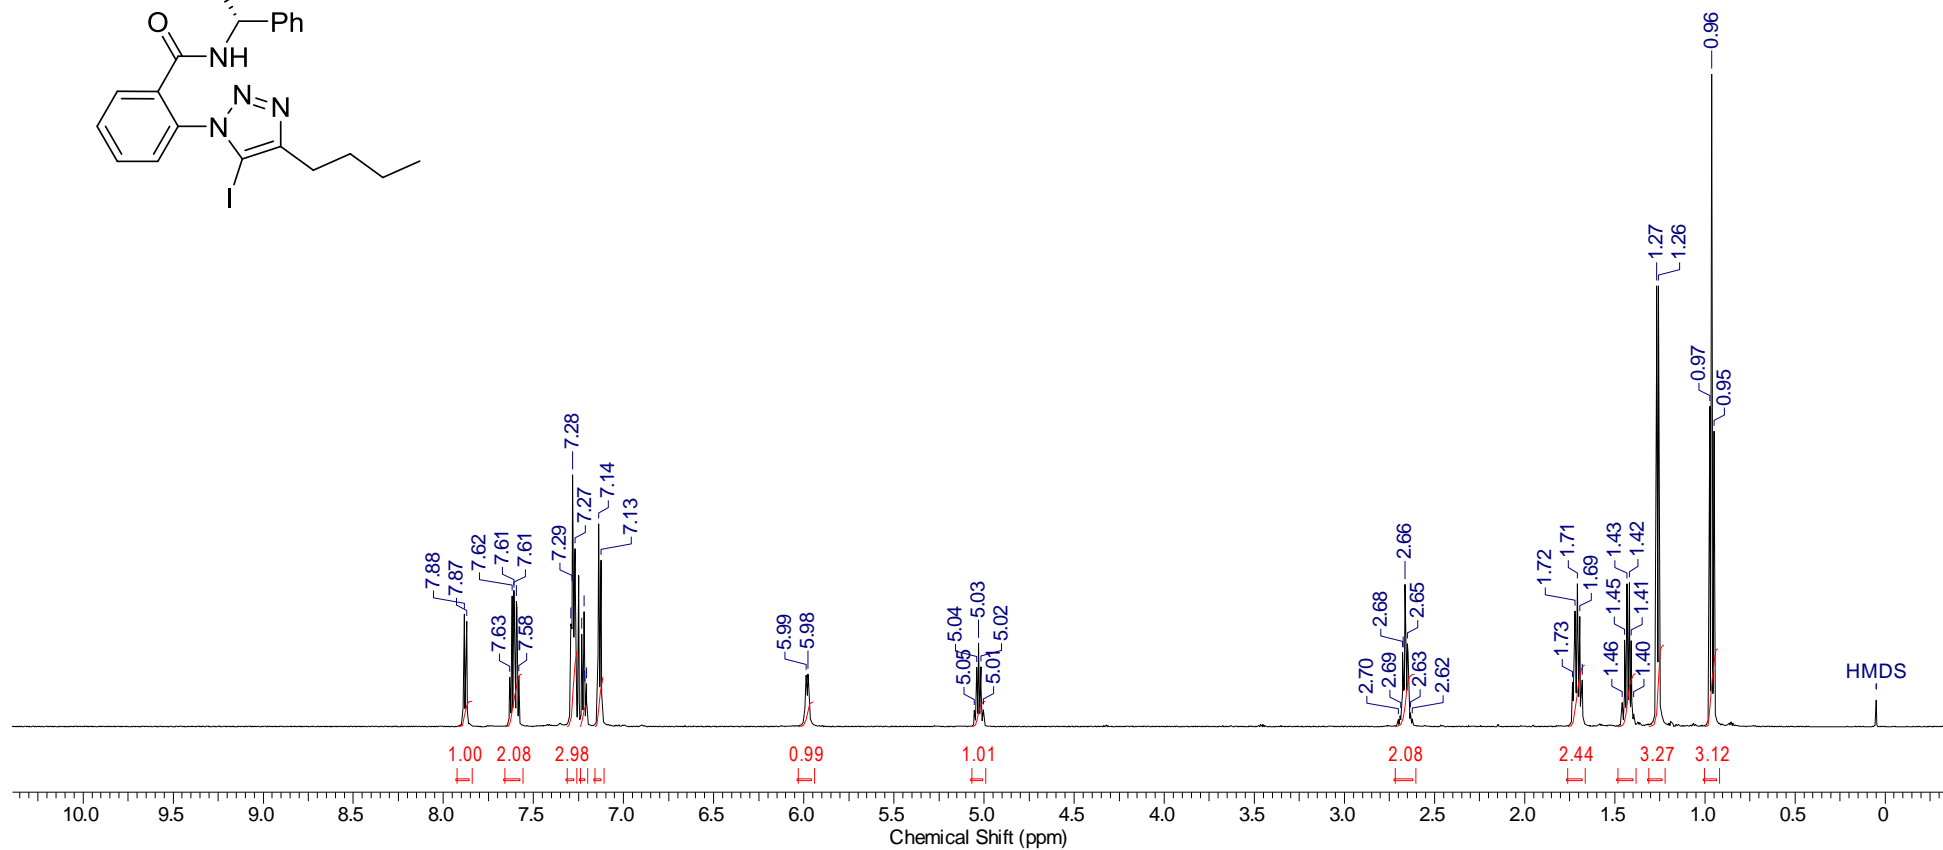

2-(4-Butyl-5-iodo-1*H*-1,2,3-triazol-1-yl)-*N*-[(1*R*)-1-phenylethyl]benzamide (1u)

$^{13}\text{C}\{^1\text{H}\}$  NMR (151 MHz,  $\text{CDCl}_3$ )

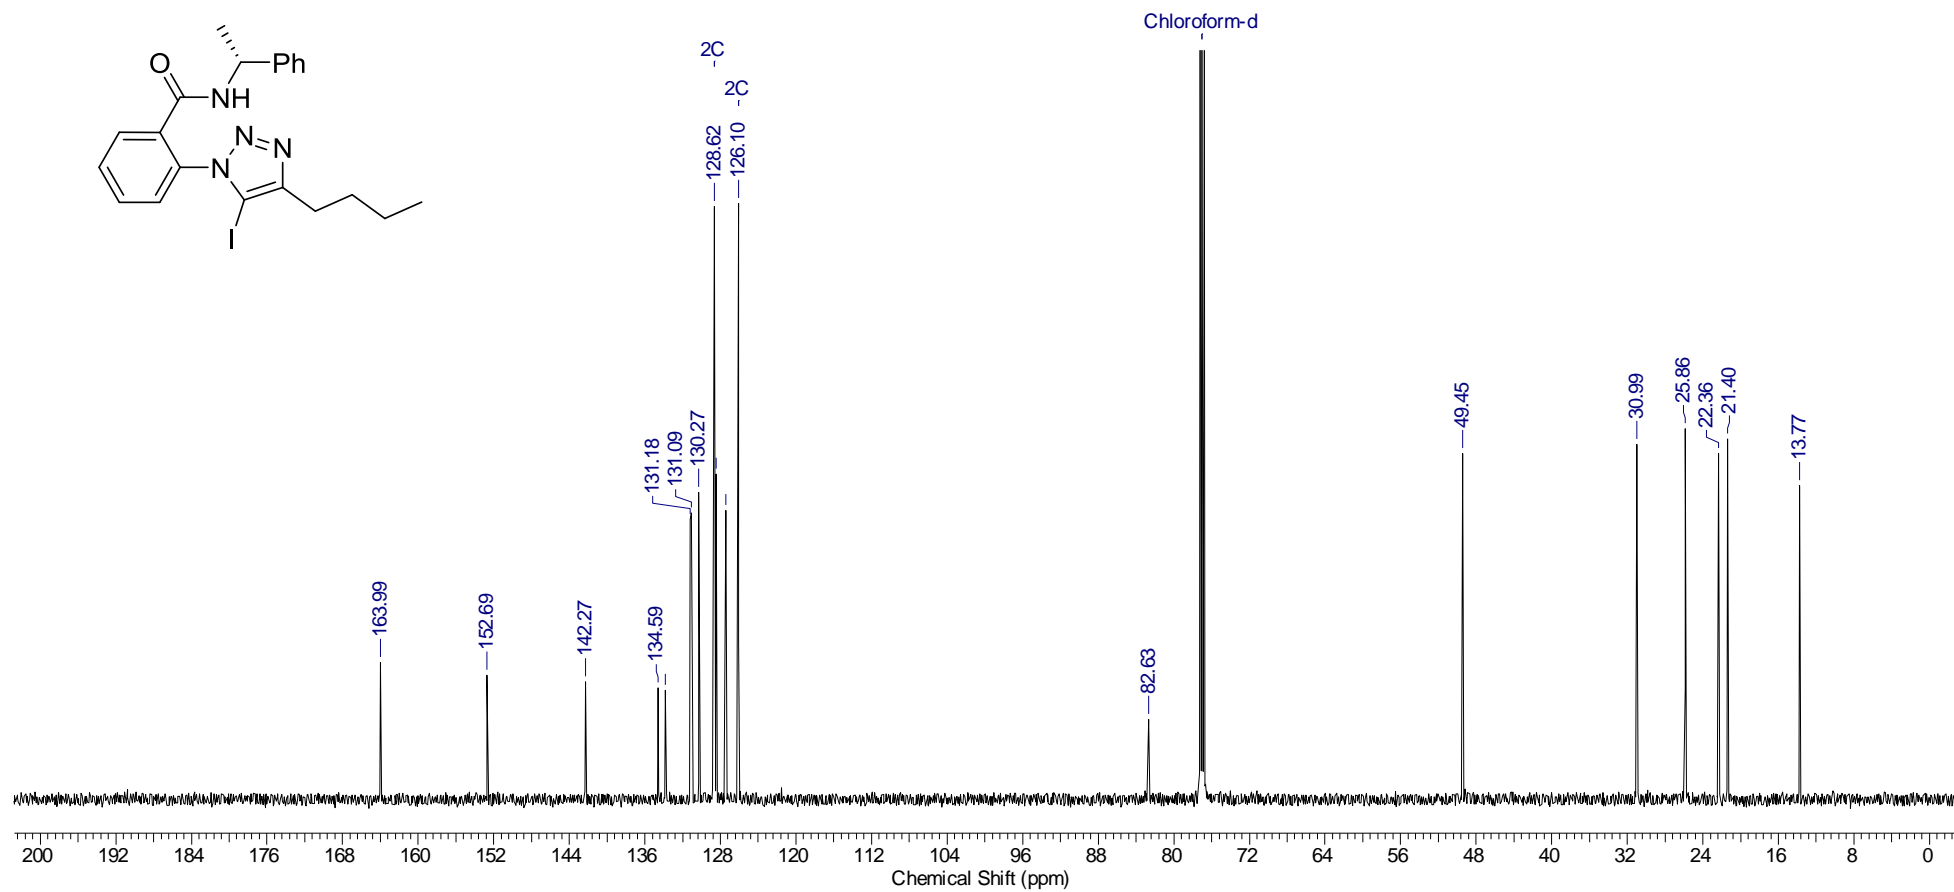

2-(4-Butyl-5-iodo-1*H*-1,2,3-triazol-1-yl)-*N*-[(1*R*)-1-phenylethyl]benzamide (1u)

APT (151 MHz, CDCl<sub>3</sub>)

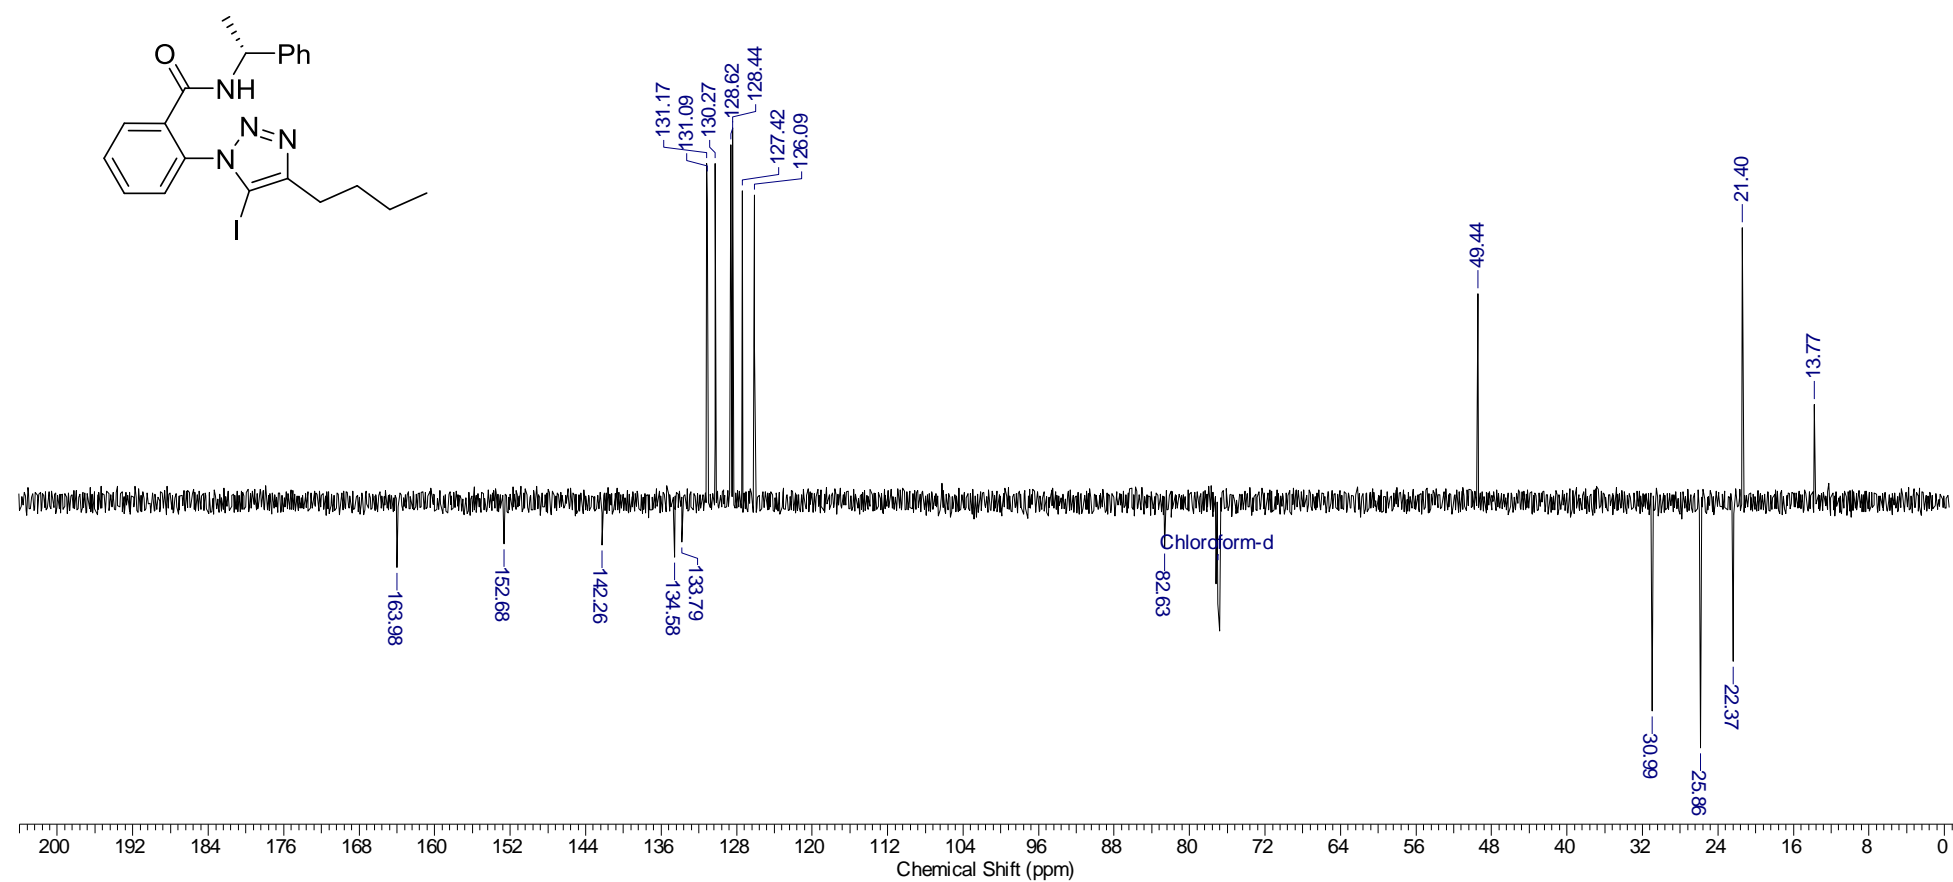

2-(4-Butyl-5-iodo-1*H*-1,2,3-triazol-1-yl)benzohydrazide (1v)

<sup>1</sup>H NMR (400 MHz, CDCl<sub>3</sub>-CD<sub>3</sub>OD)

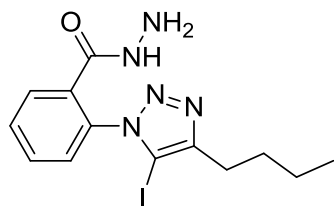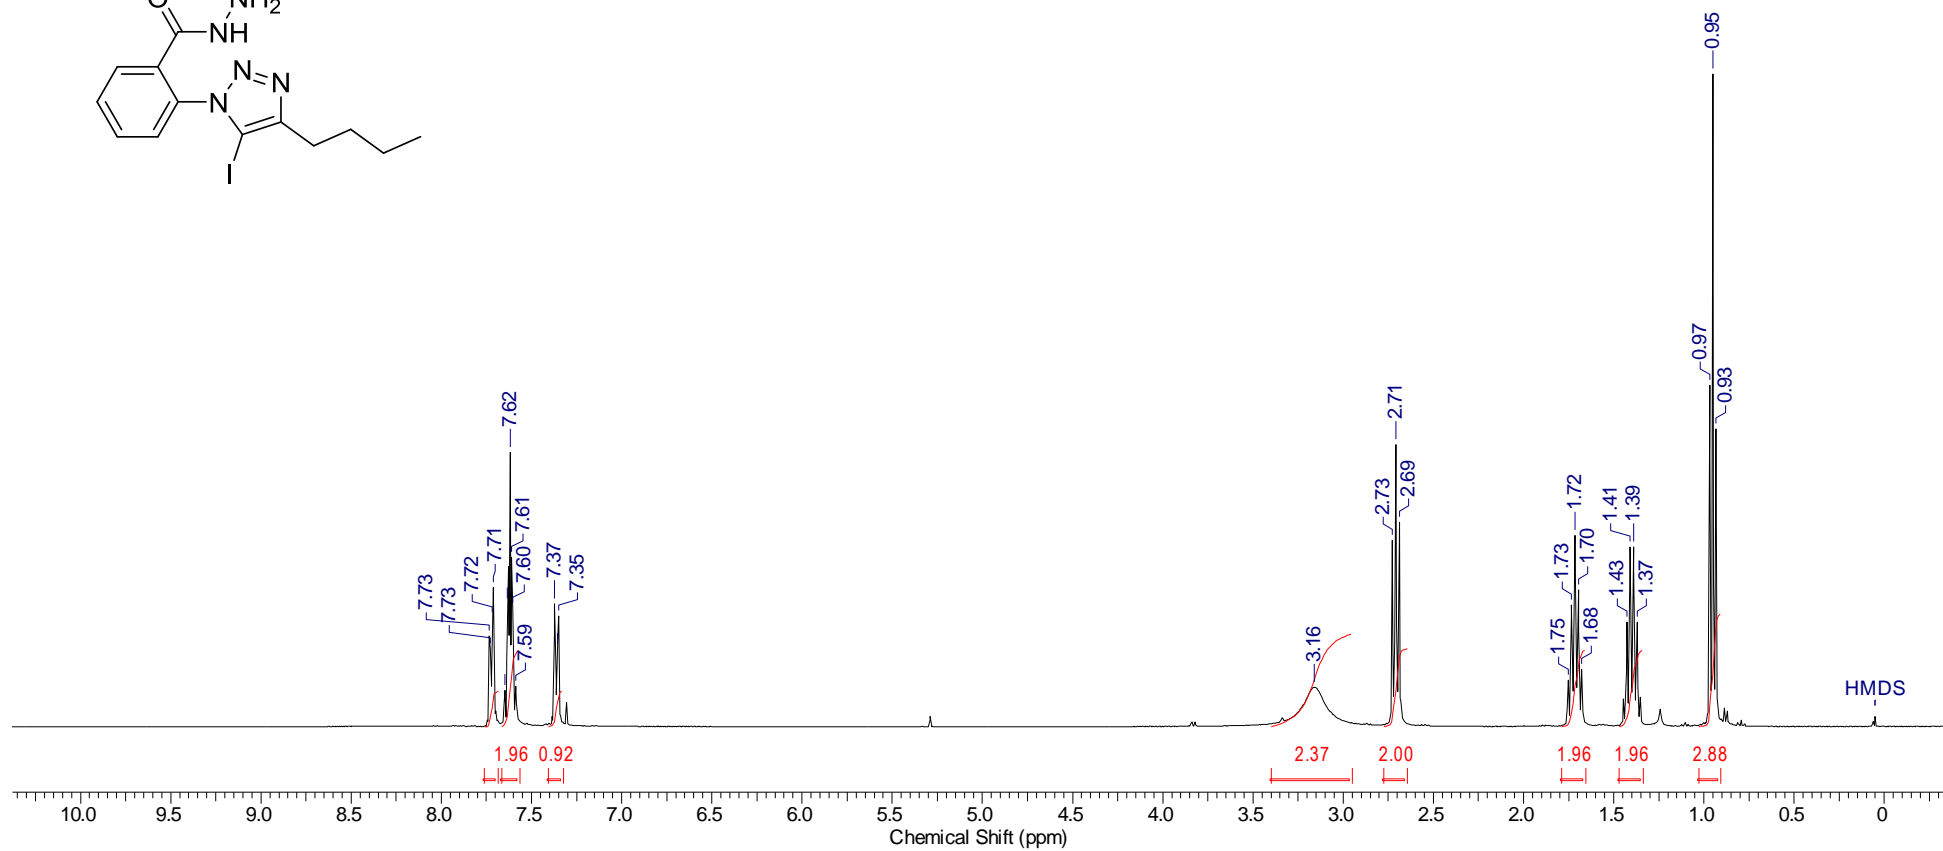

**2-(4-Butyl-5-iodo-1H-1,2,3-triazol-1-yl)benzohydrazide (1v)**

$^{13}\text{C}\{^1\text{H}\}$  NMR (100 MHz,  $\text{CDCl}_3\text{-CD}_3\text{OD}$ )

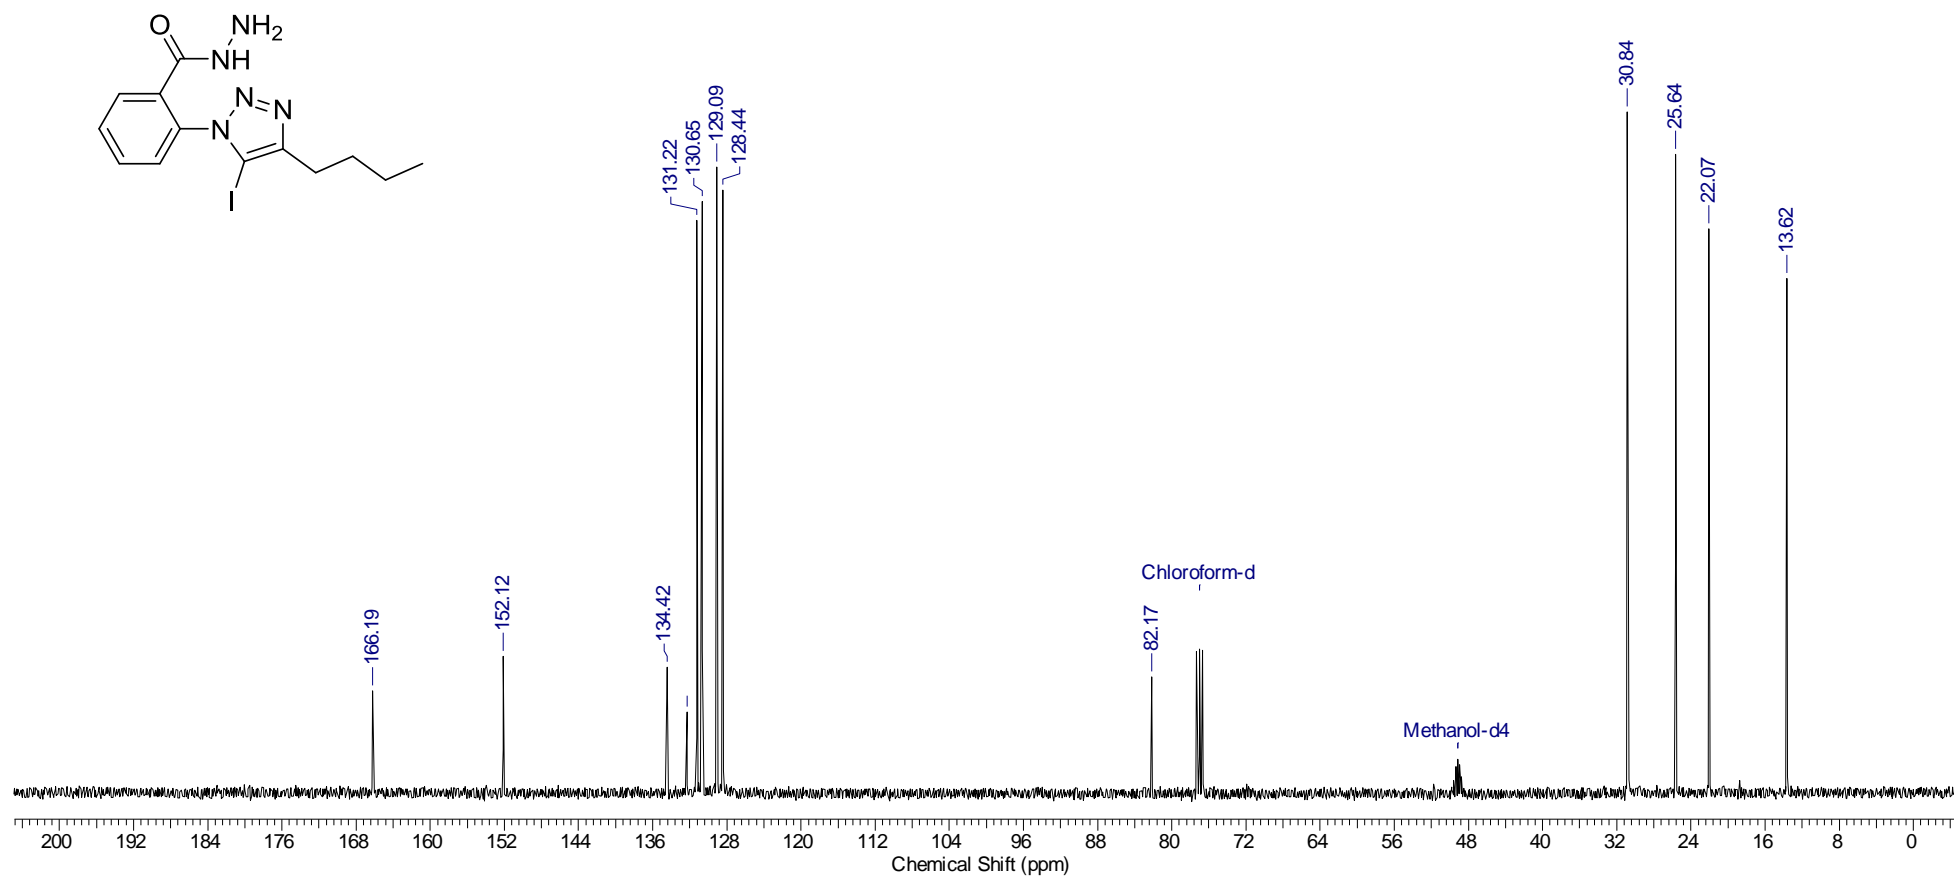

2-(4-Butyl-5-iodo-1*H*-1,2,3-triazol-1-yl)-*N*-(2-furylmethyl)benzamide (1w)

<sup>1</sup>H NMR (400 MHz, CDCl<sub>3</sub>)

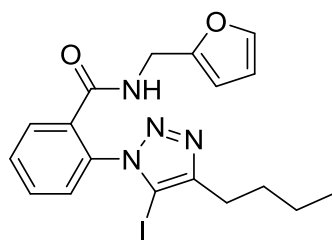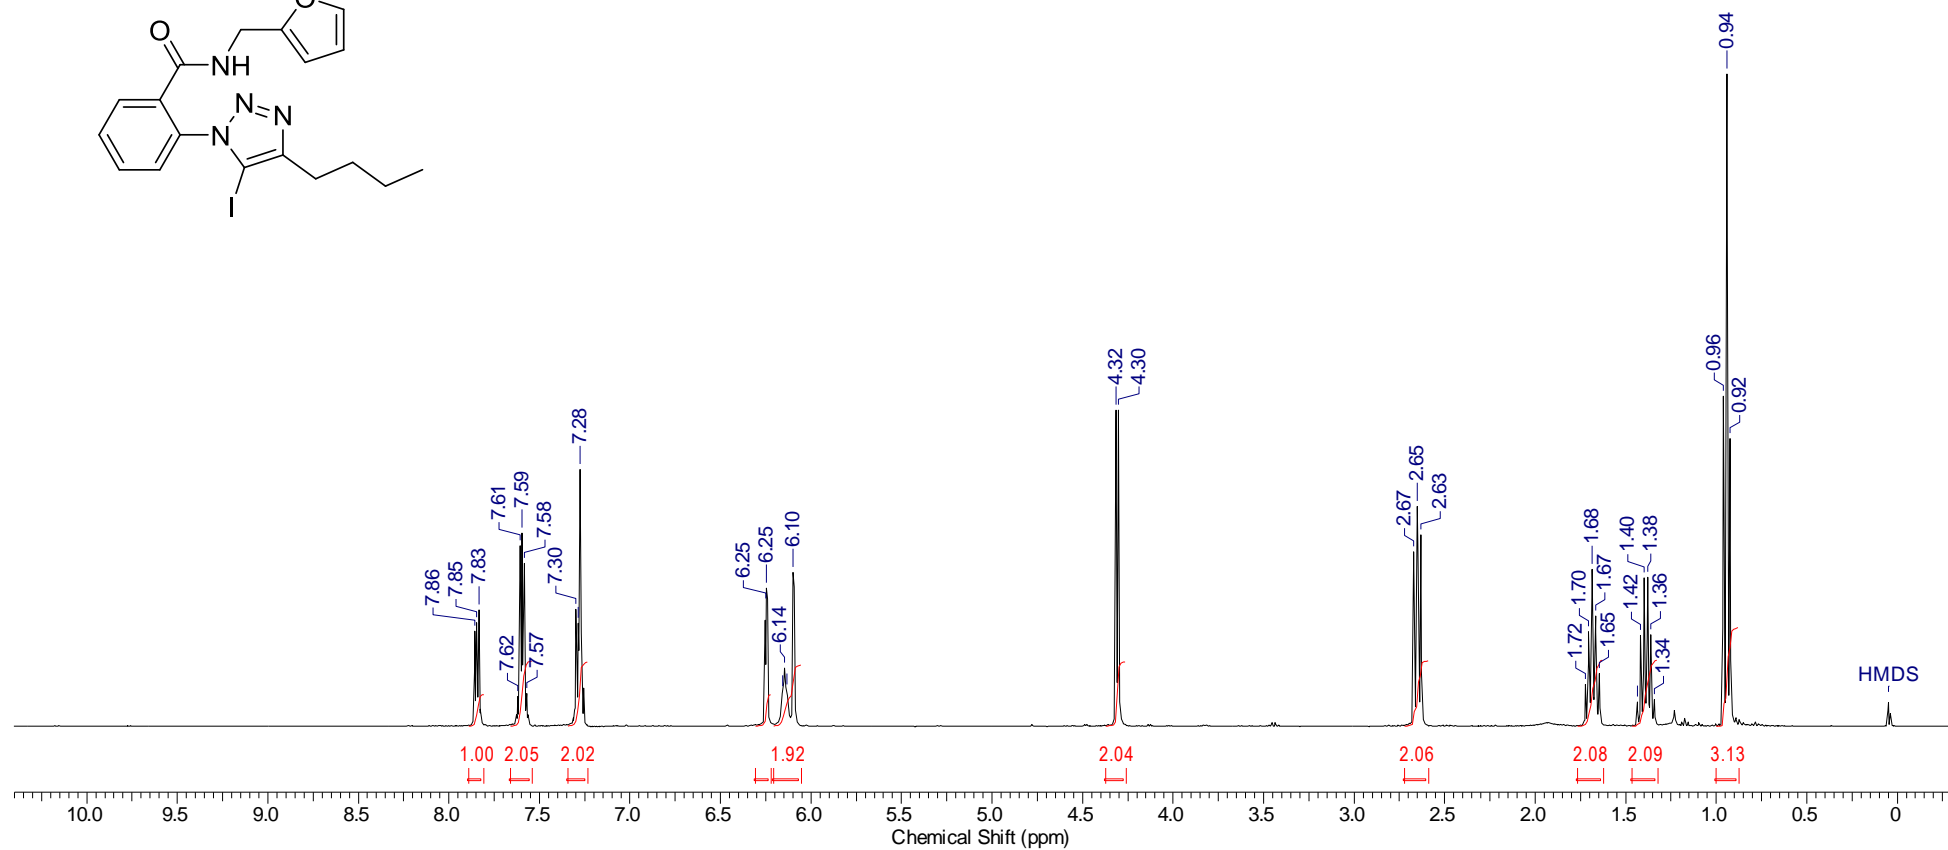



2-(4-Butyl-5-iodo-1*H*-1,2,3-triazol-1-yl)-*N*-(2-furylmethyl)benzamide (1w)

$^{13}\text{C}\{^1\text{H}\}$  NMR (100 MHz,  $\text{CDCl}_3$ )

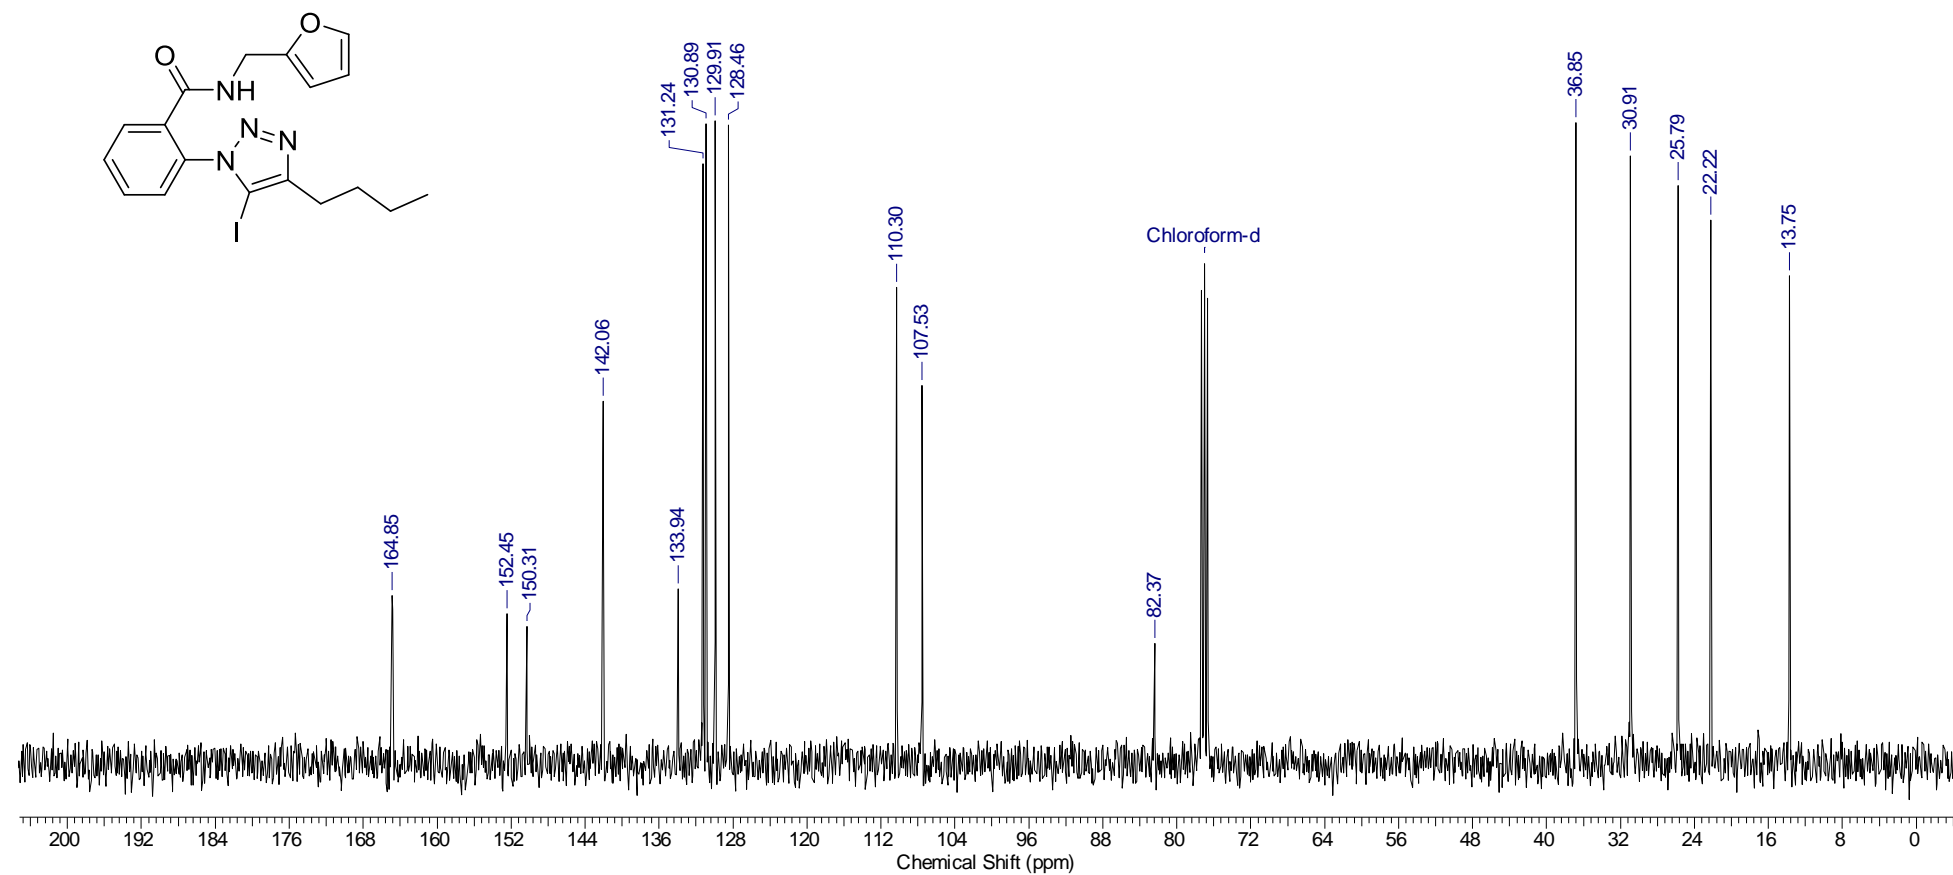

2-(4-Butyl-5-iodo-1H-1,2,3-triazol-1-yl)-N-[2-(5-methoxy-1H-indol-3-yl)ethyl]benzamide (1x)

<sup>1</sup>H NMR (400 MHz, CDCl<sub>3</sub>)

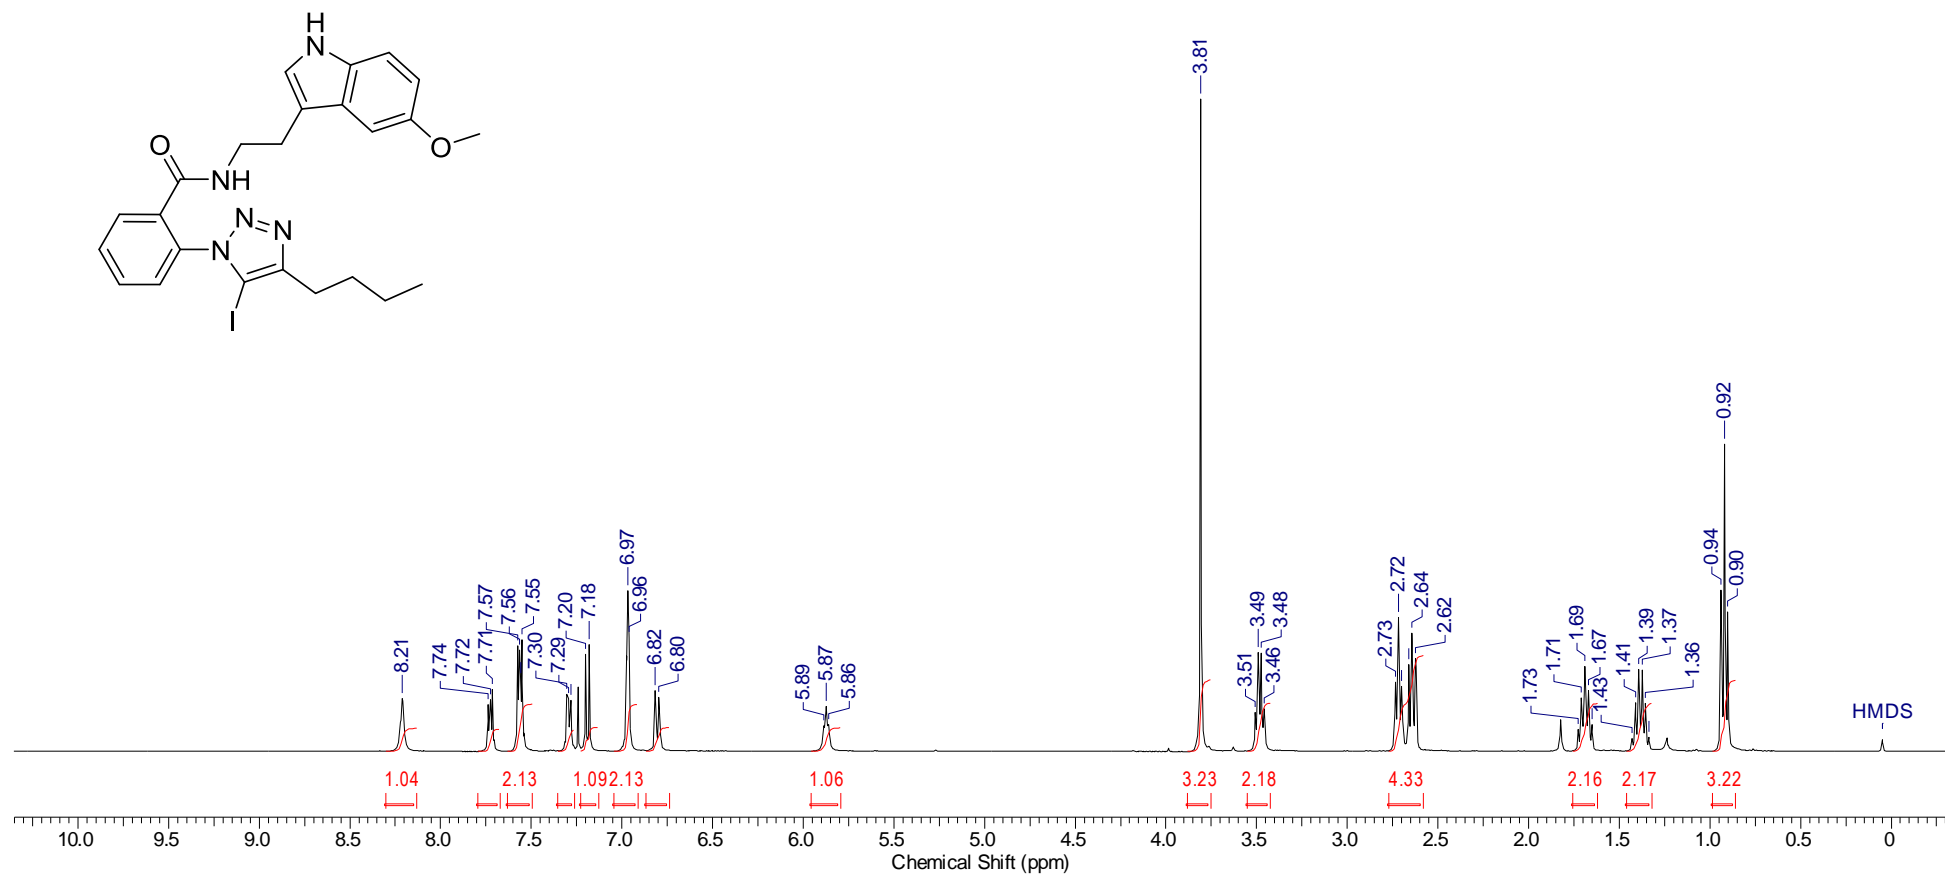

2-(4-Butyl-5-iodo-1*H*-1,2,3-triazol-1-yl)-*N*-[2-(5-methoxy-1*H*-indol-3-yl)ethyl]benzamide (1x)

$^{13}\text{C}\{^1\text{H}\}$  NMR (100 MHz,  $\text{CDCl}_3$ )

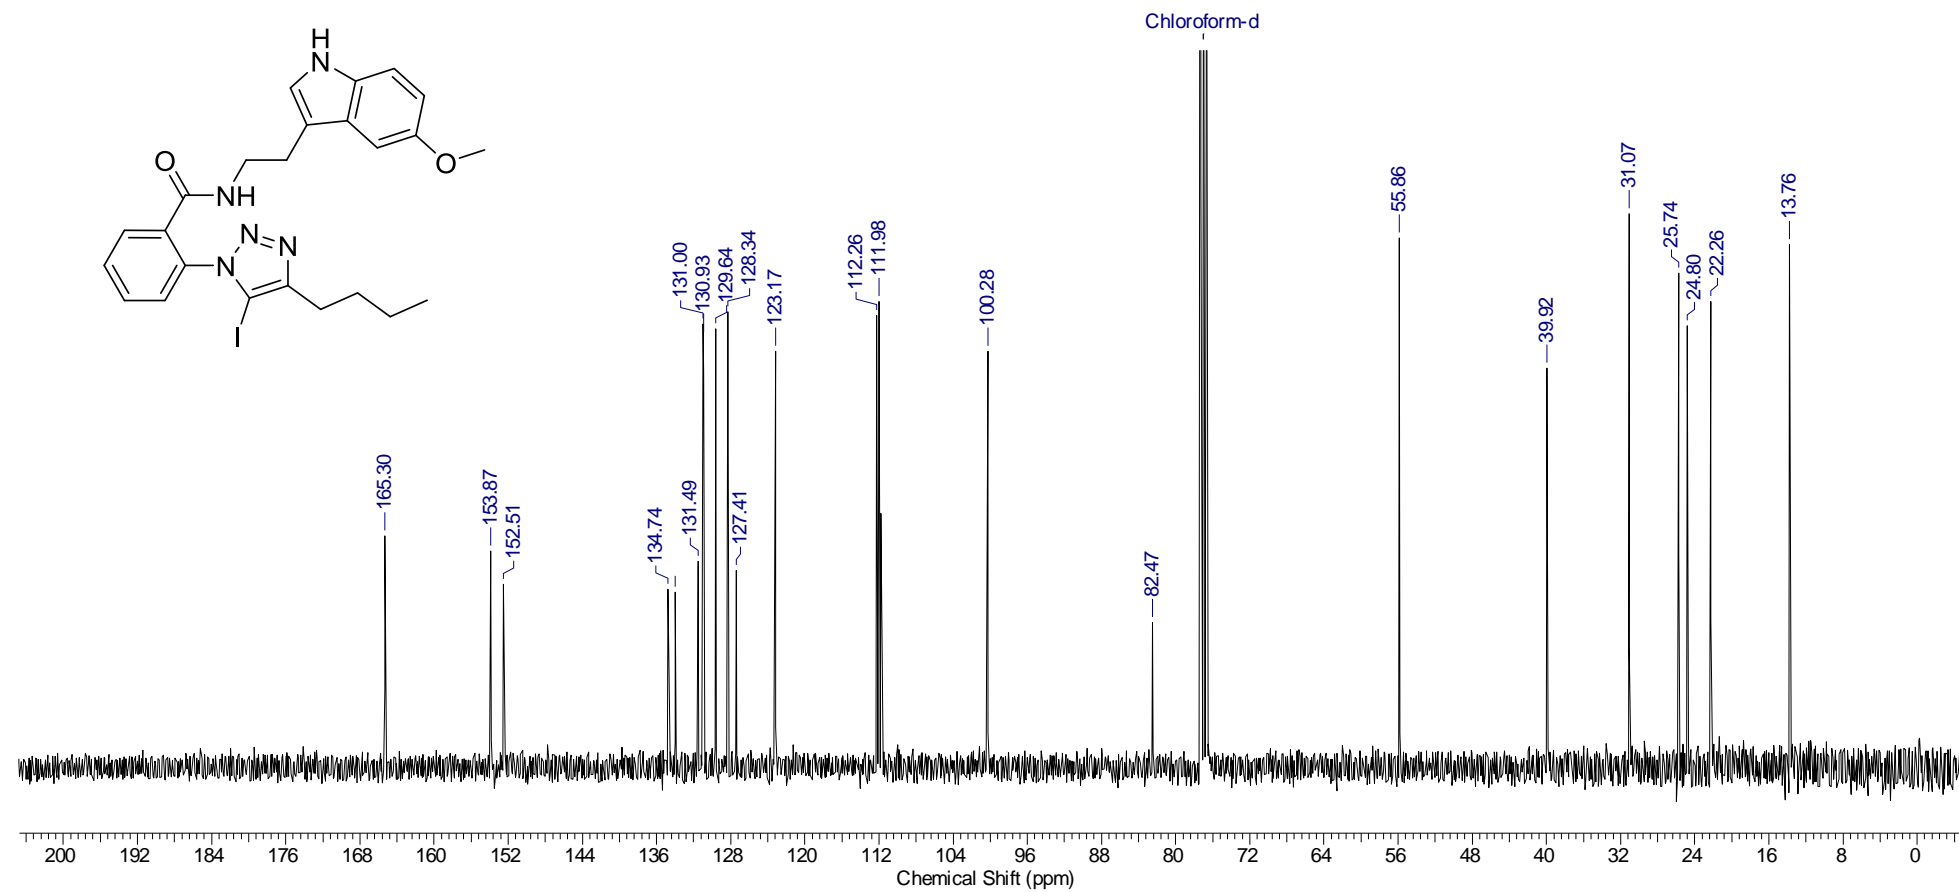

2-(4-Butyl-5-iodo-1*H*-1,2,3-triazol-1-yl)-*N*-[2-(3,5-dimethylisoxazol-4-yl)ethyl]benzamide (1y)

<sup>1</sup>H NMR (400 MHz, CDCl<sub>3</sub>)

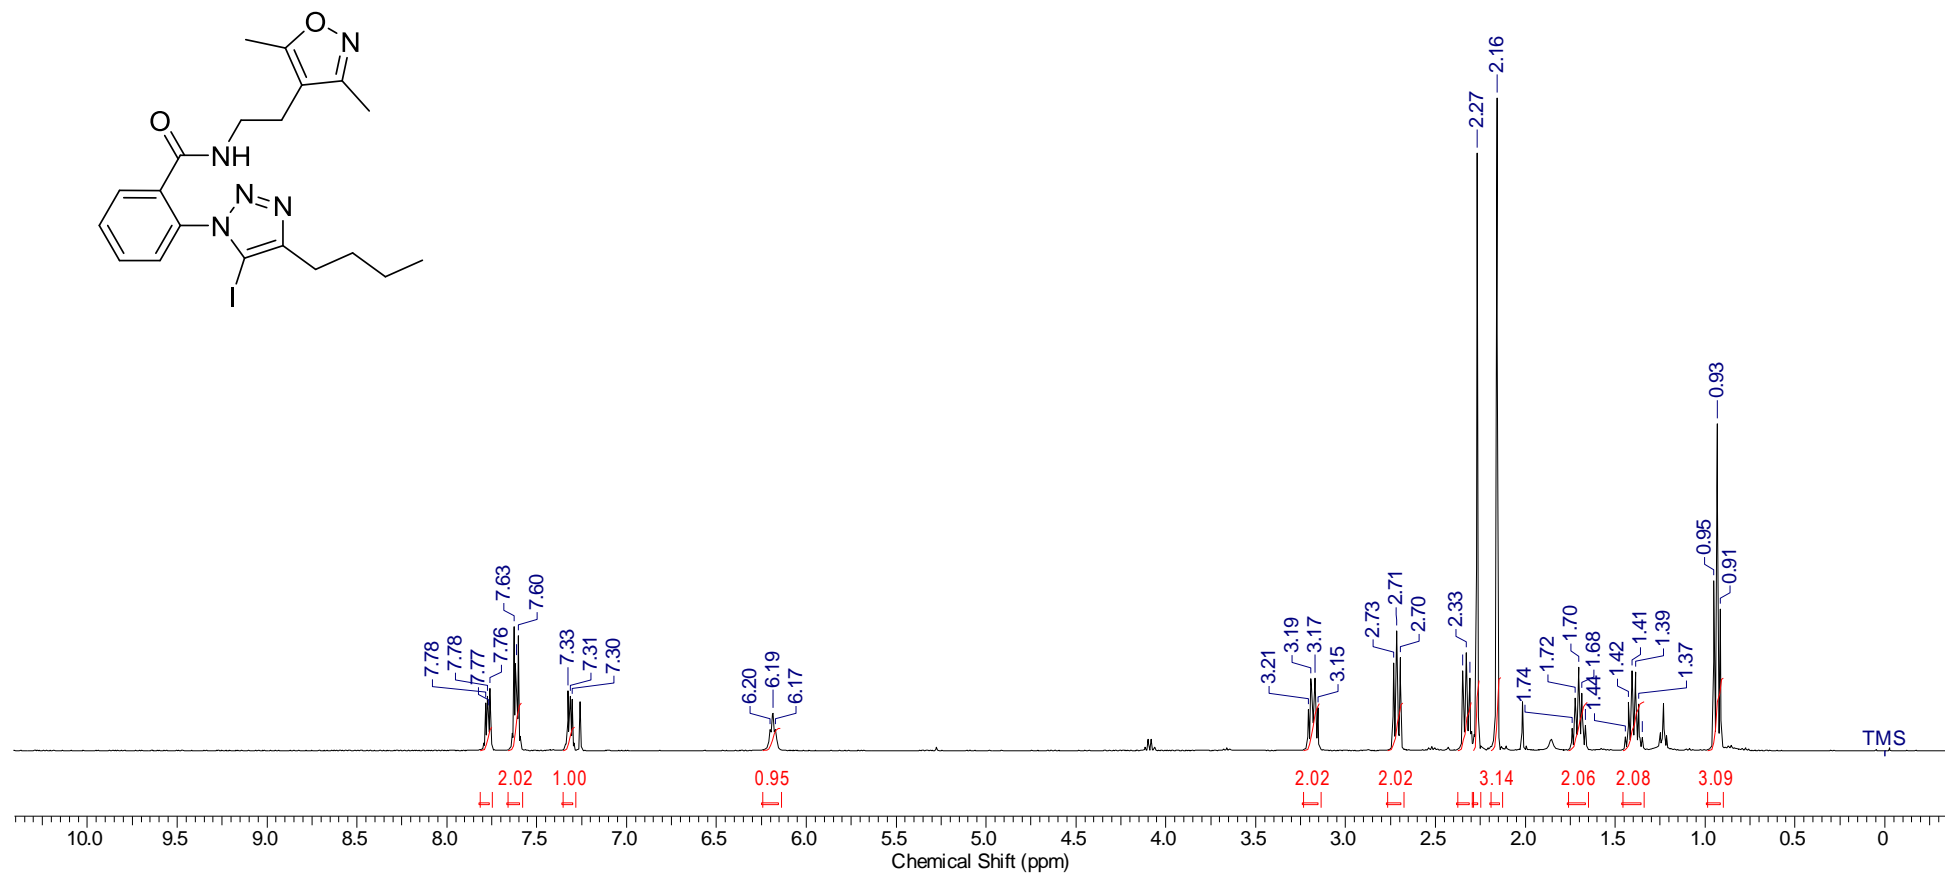

2-(4-Butyl-5-iodo-1H-1,2,3-triazol-1-yl)-N-[2-(3,5-dimethylisoxazol-4-yl)ethyl]benzamide (1y)

$^{13}\text{C}\{^1\text{H}\}$  NMR (100 MHz,  $\text{CDCl}_3$ )

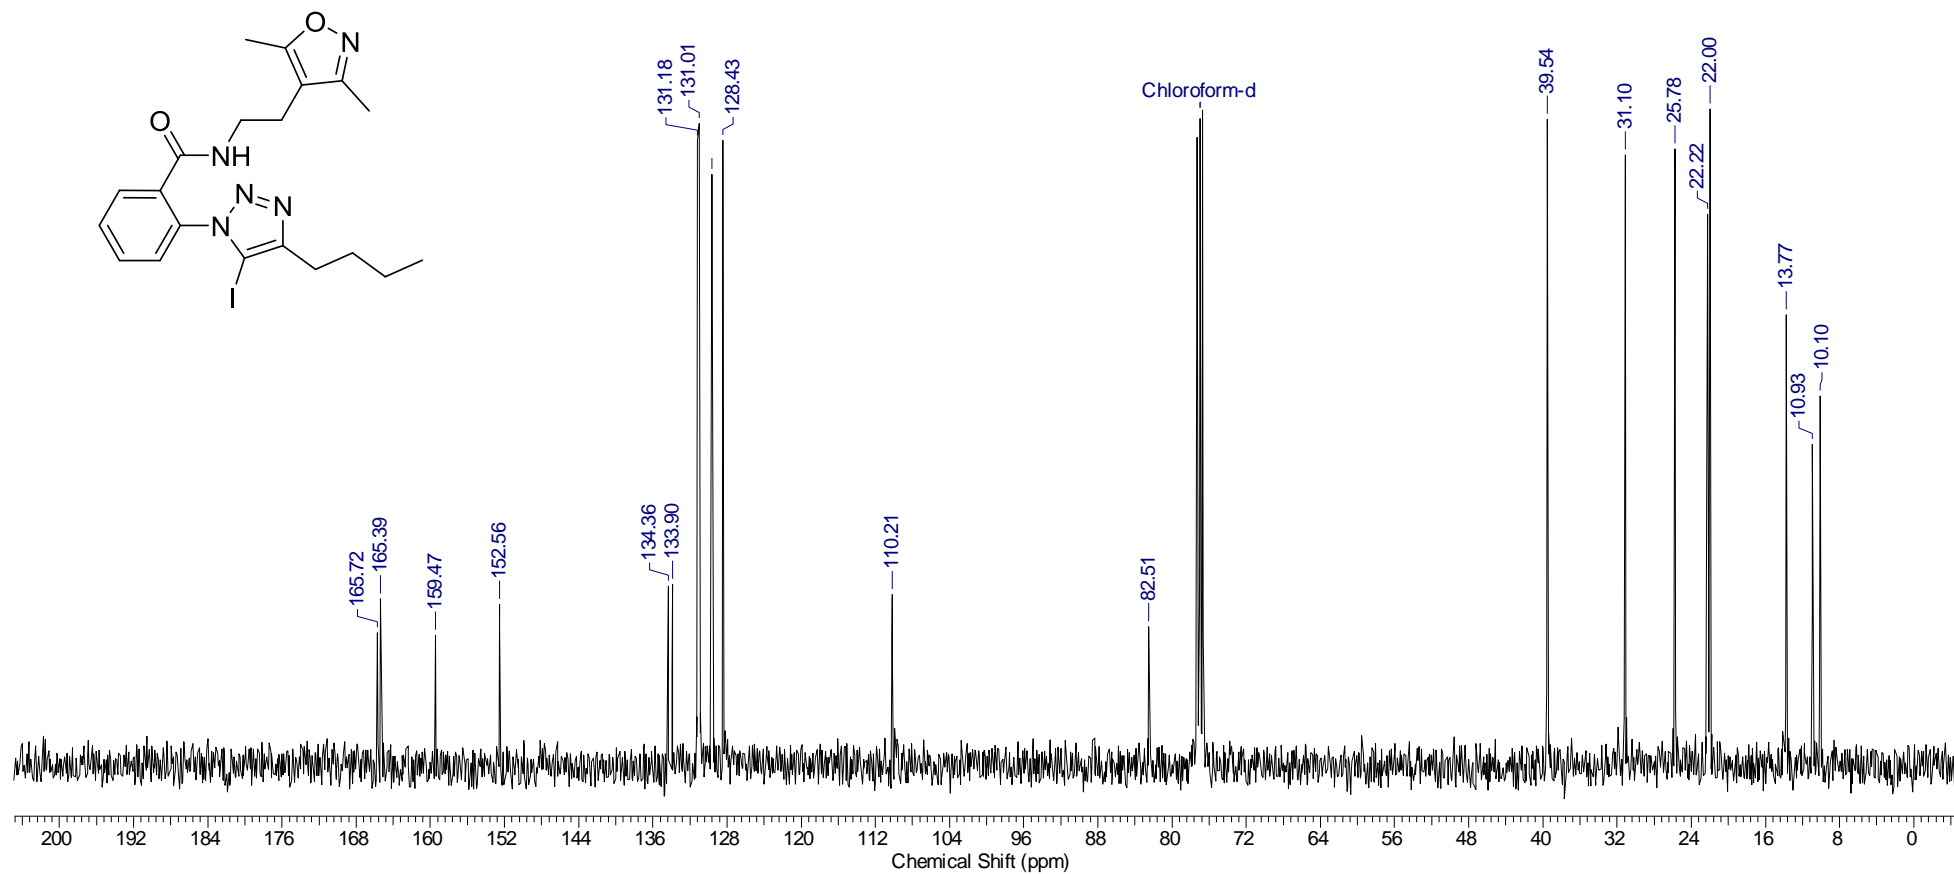

***N*-(*tert*-Butyl)-2-(4-butyl-5-iodo-1*H*-1,2,3-triazol-1-yl)benzamide (1z)**

<sup>1</sup>H NMR (400 MHz, CDCl<sub>3</sub>)

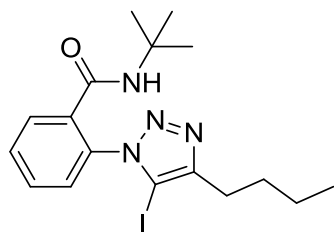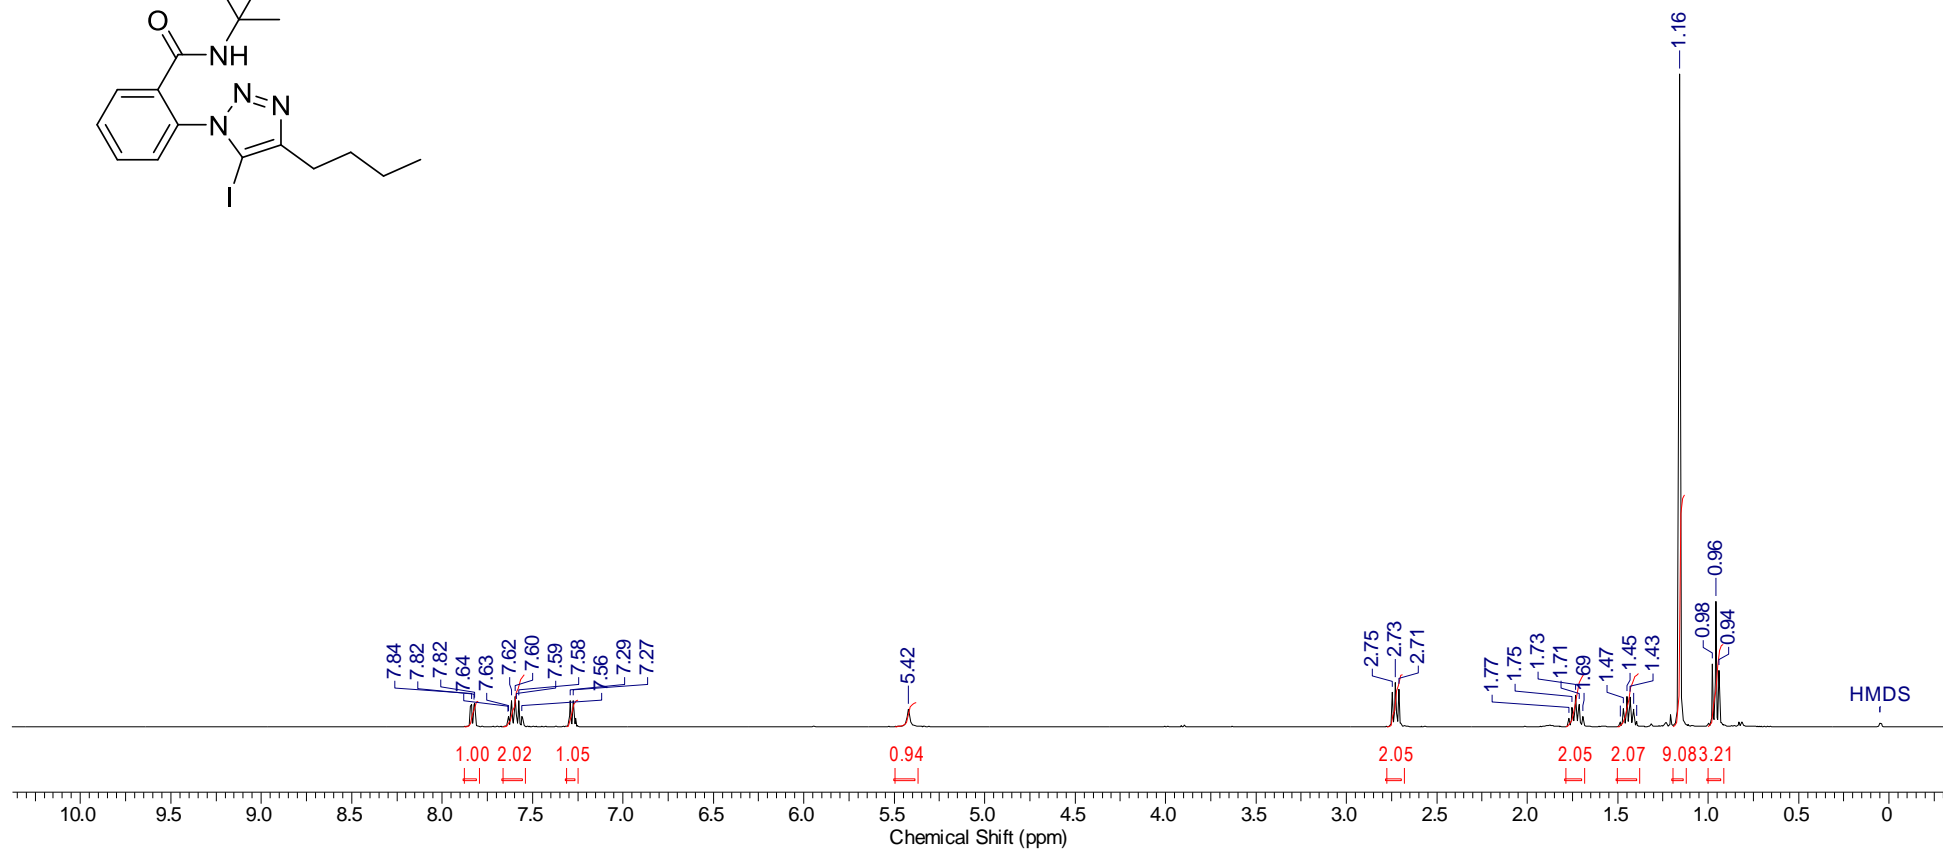

***N*-(*tert*-Butyl)-2-(4-butyl-5-iodo-1*H*-1,2,3-triazol-1-yl)benzamide (1z)**

$^{13}\text{C}\{^1\text{H}\}$  NMR (100 MHz,  $\text{CDCl}_3$ )

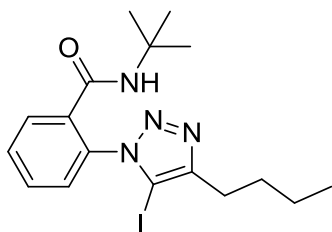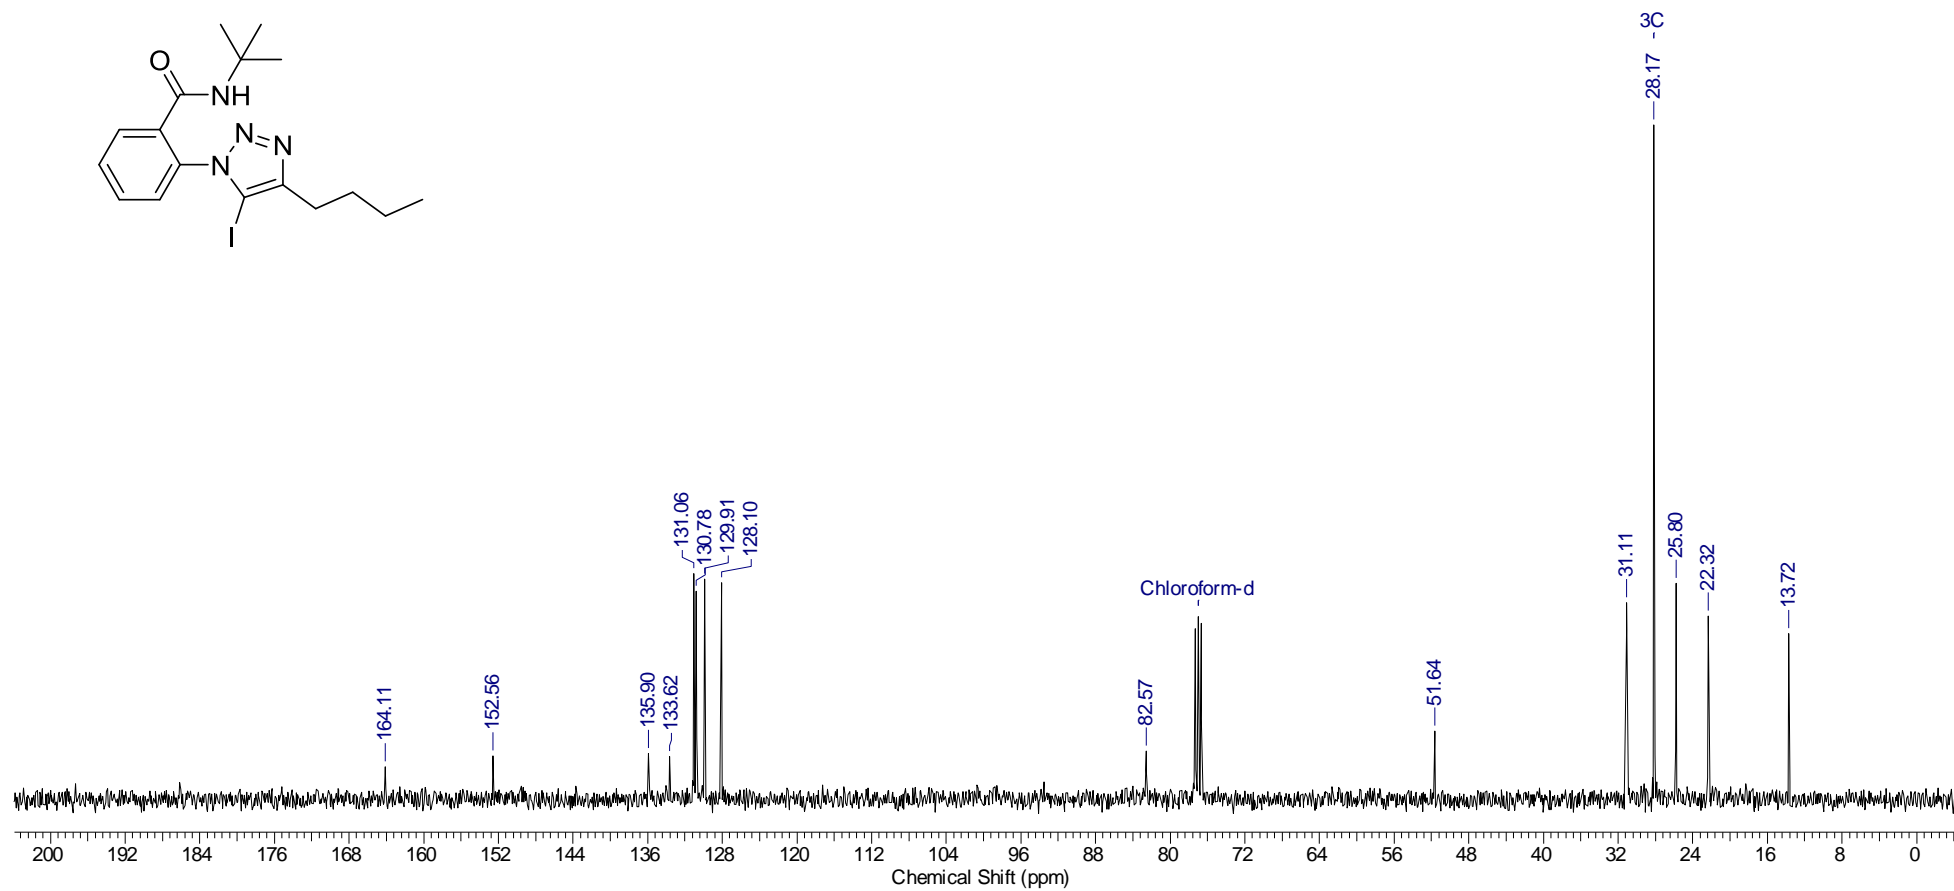

*N,N'*-Butane-1,4-diylbis[2-(4-butyl-5-iodo-1*H*-1,2,3-triazol-1-yl)benzamide] (1aa)

<sup>1</sup>H NMR (400 MHz, CDCl<sub>3</sub>)

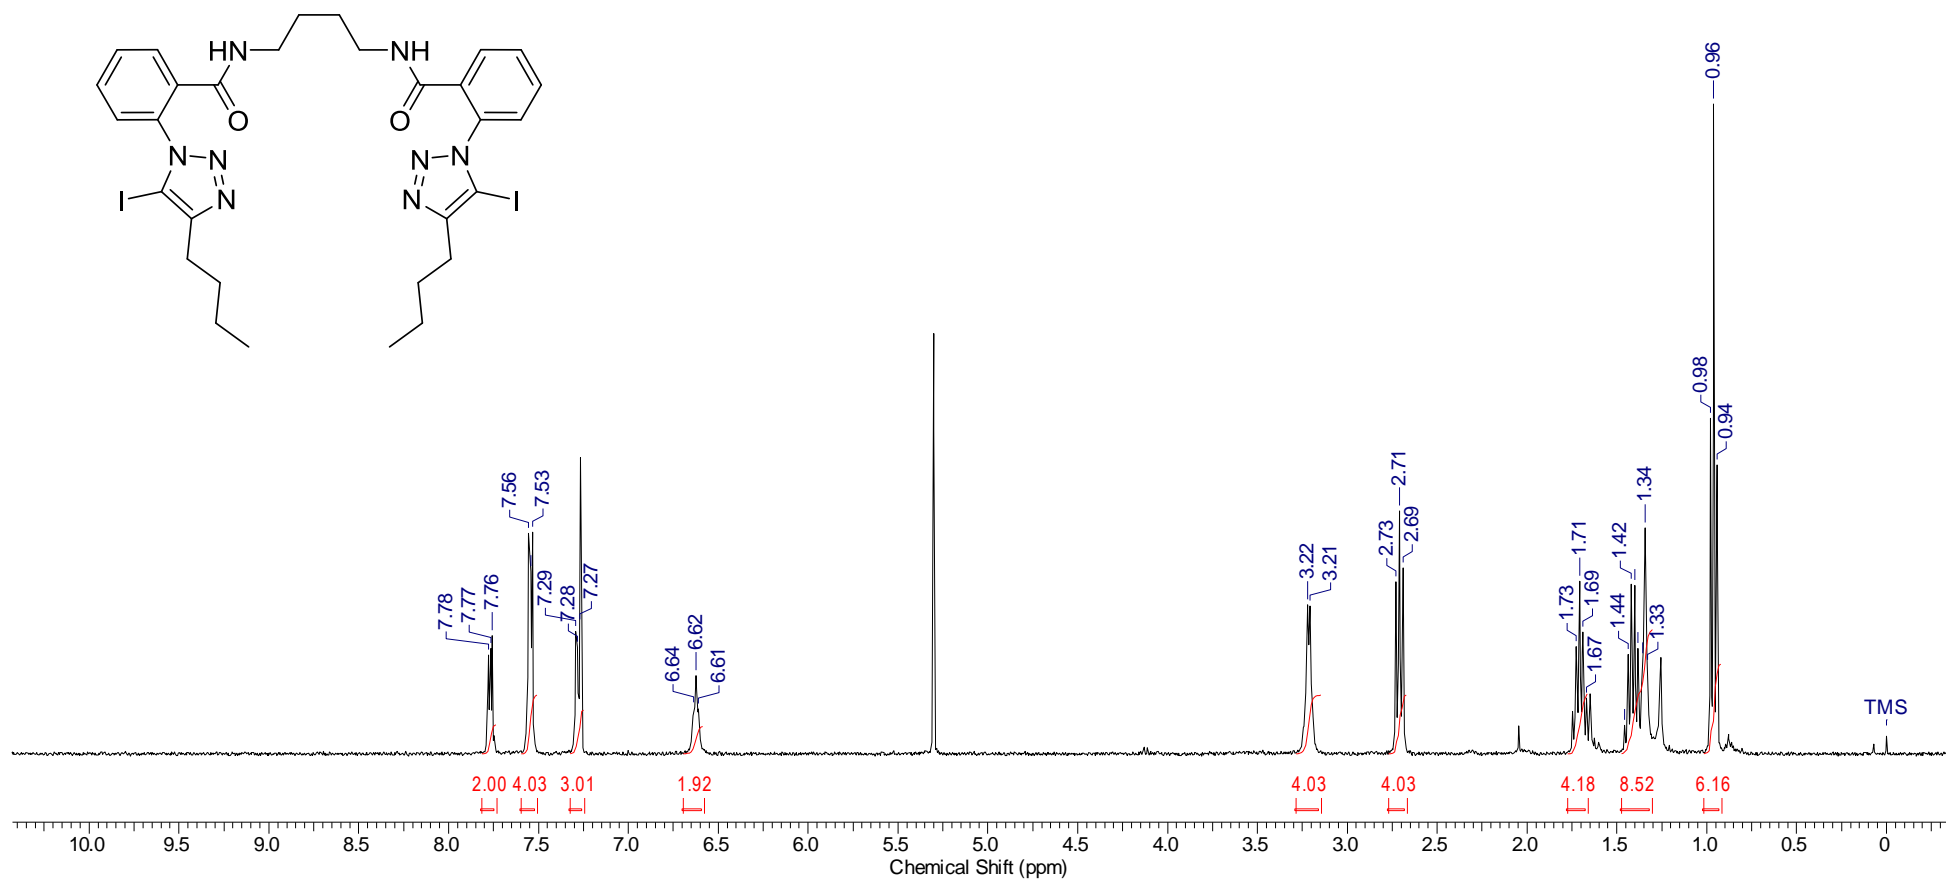



*N,N'*-Butane-1,4-diylbis[2-(4-butyl-5-iodo-1*H*-1,2,3-triazol-1-yl)benzamide] (1a)

$^{13}\text{C}\{^1\text{H}\}$  NMR (100 MHz,  $\text{CDCl}_3$ )

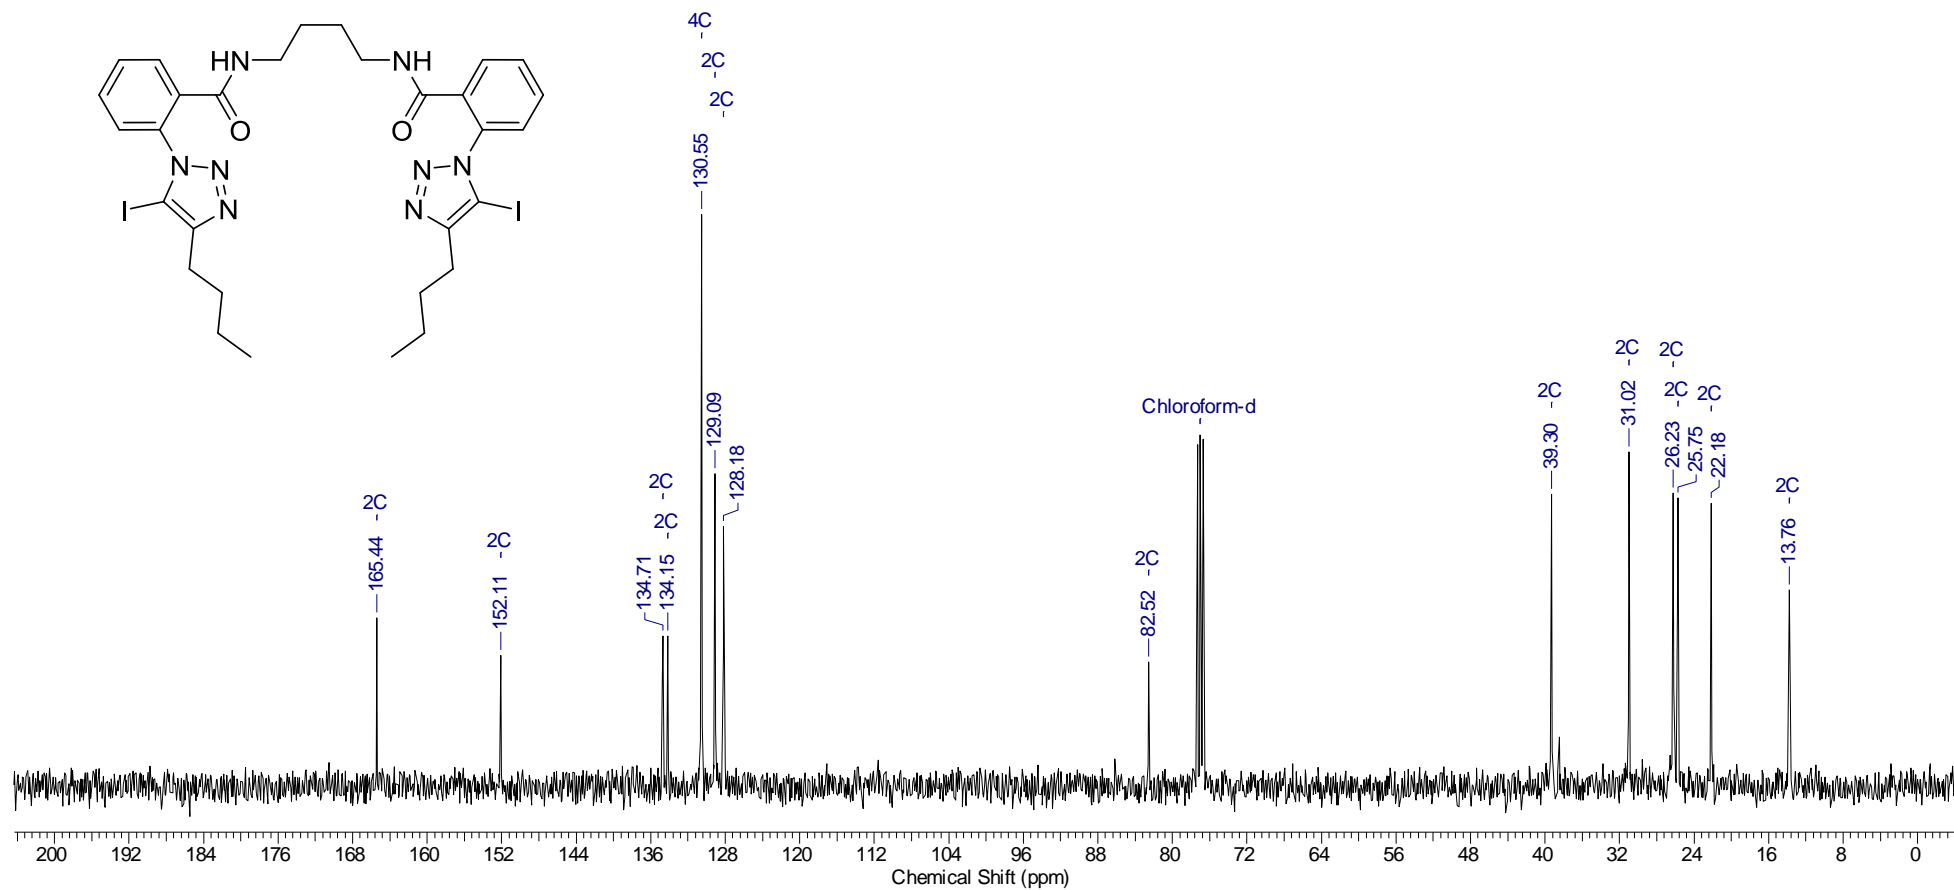

2-(4-Butyl-5-iodo-1H-1,2,3-triazol-1-yl)-N-[(3 $\alpha$ ,5 $\beta$ ,12 $\alpha$ )-3,12-dihydroxycholan-24-yl]benzamide (1ab)

$^1\text{H}$  NMR (400 MHz,  $\text{CDCl}_3$ )

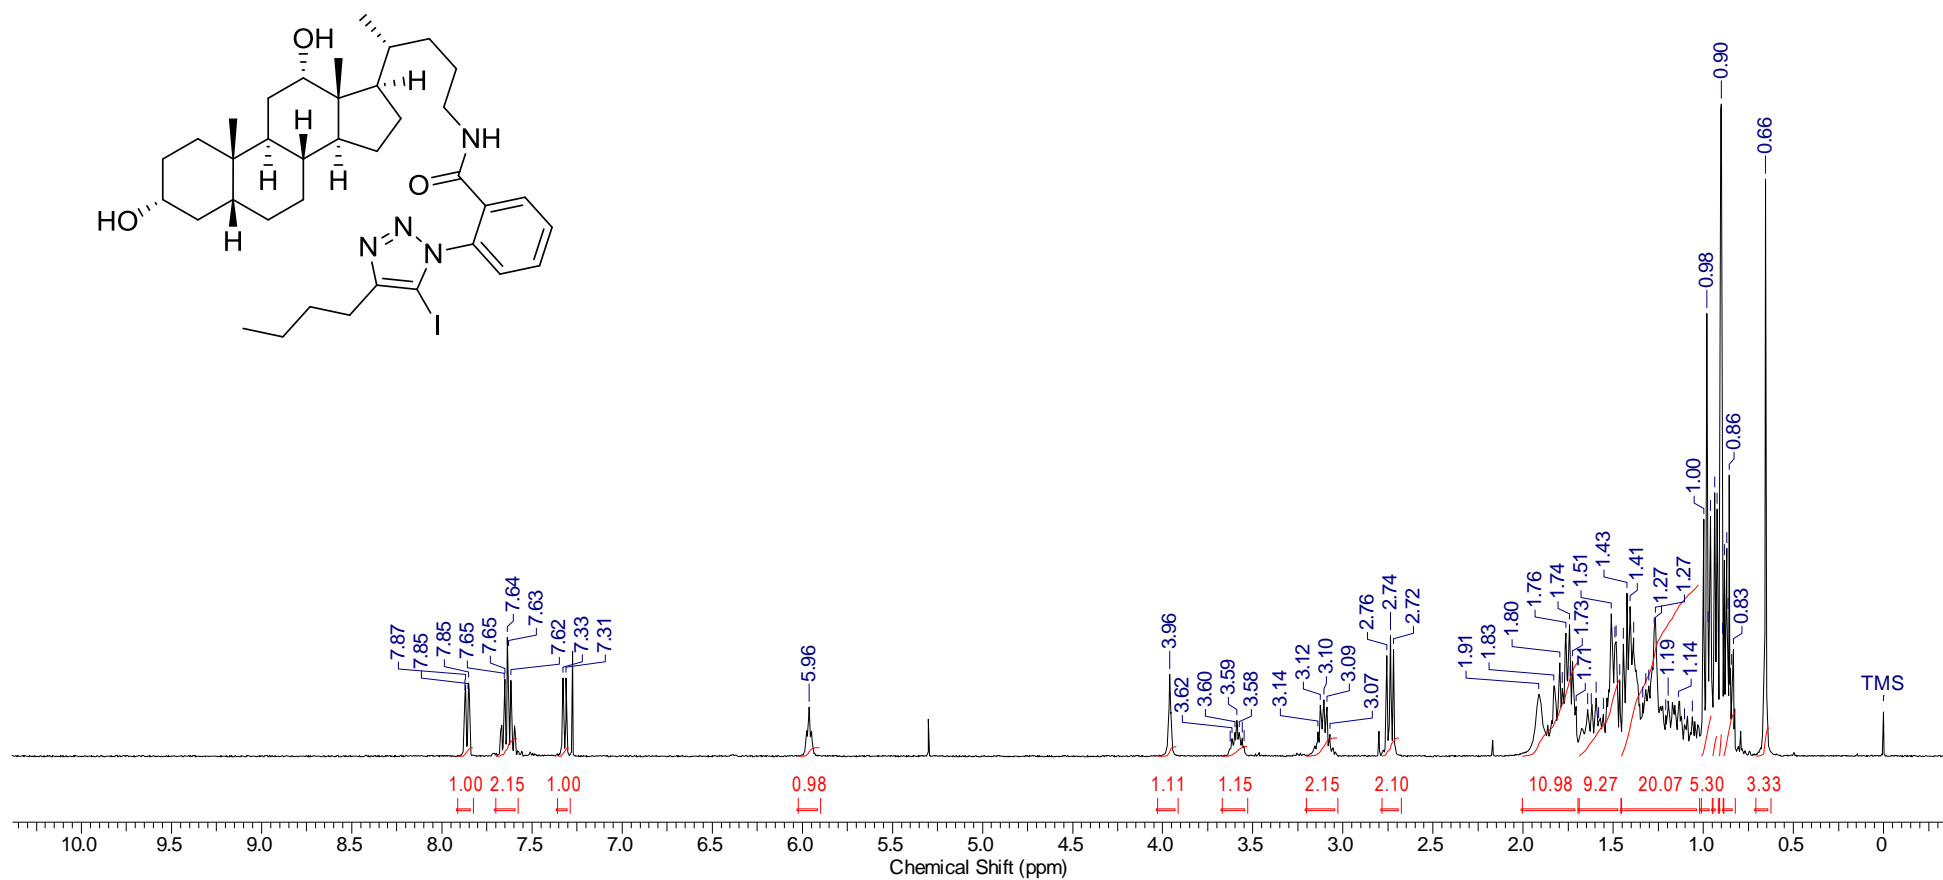

2-(4-Butyl-5-iodo-1*H*-1,2,3-triazol-1-yl)-*N*-[(3 $\alpha$ ,5 $\beta$ ,12 $\alpha$ )-3,12-dihydroxycholan-24-yl]benzamide (1ab)

$^{13}\text{C}\{^1\text{H}\}$  NMR (100 MHz,  $\text{CDCl}_3$ )

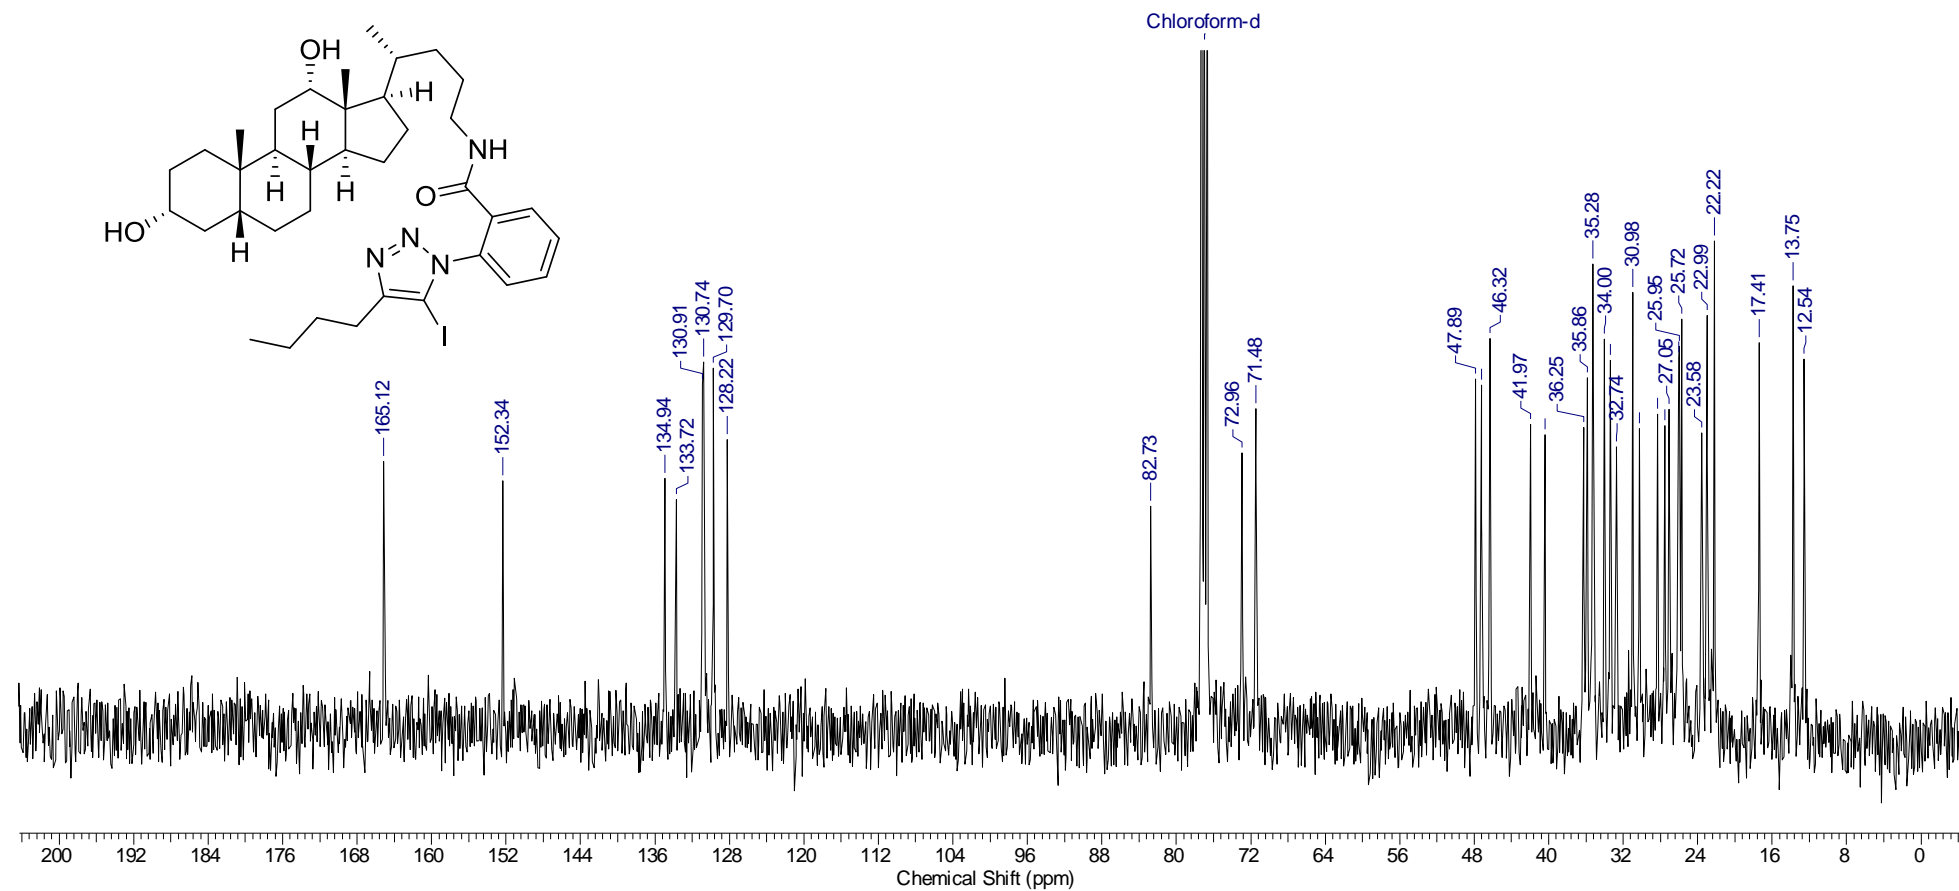

**3-Butyl-4-methyl[1,2,3]triazolo[1,5-*a*]quinazolin-5(4*H*)-one (2a)**

<sup>1</sup>H NMR (400 MHz, CDCl<sub>3</sub>)

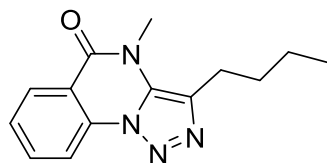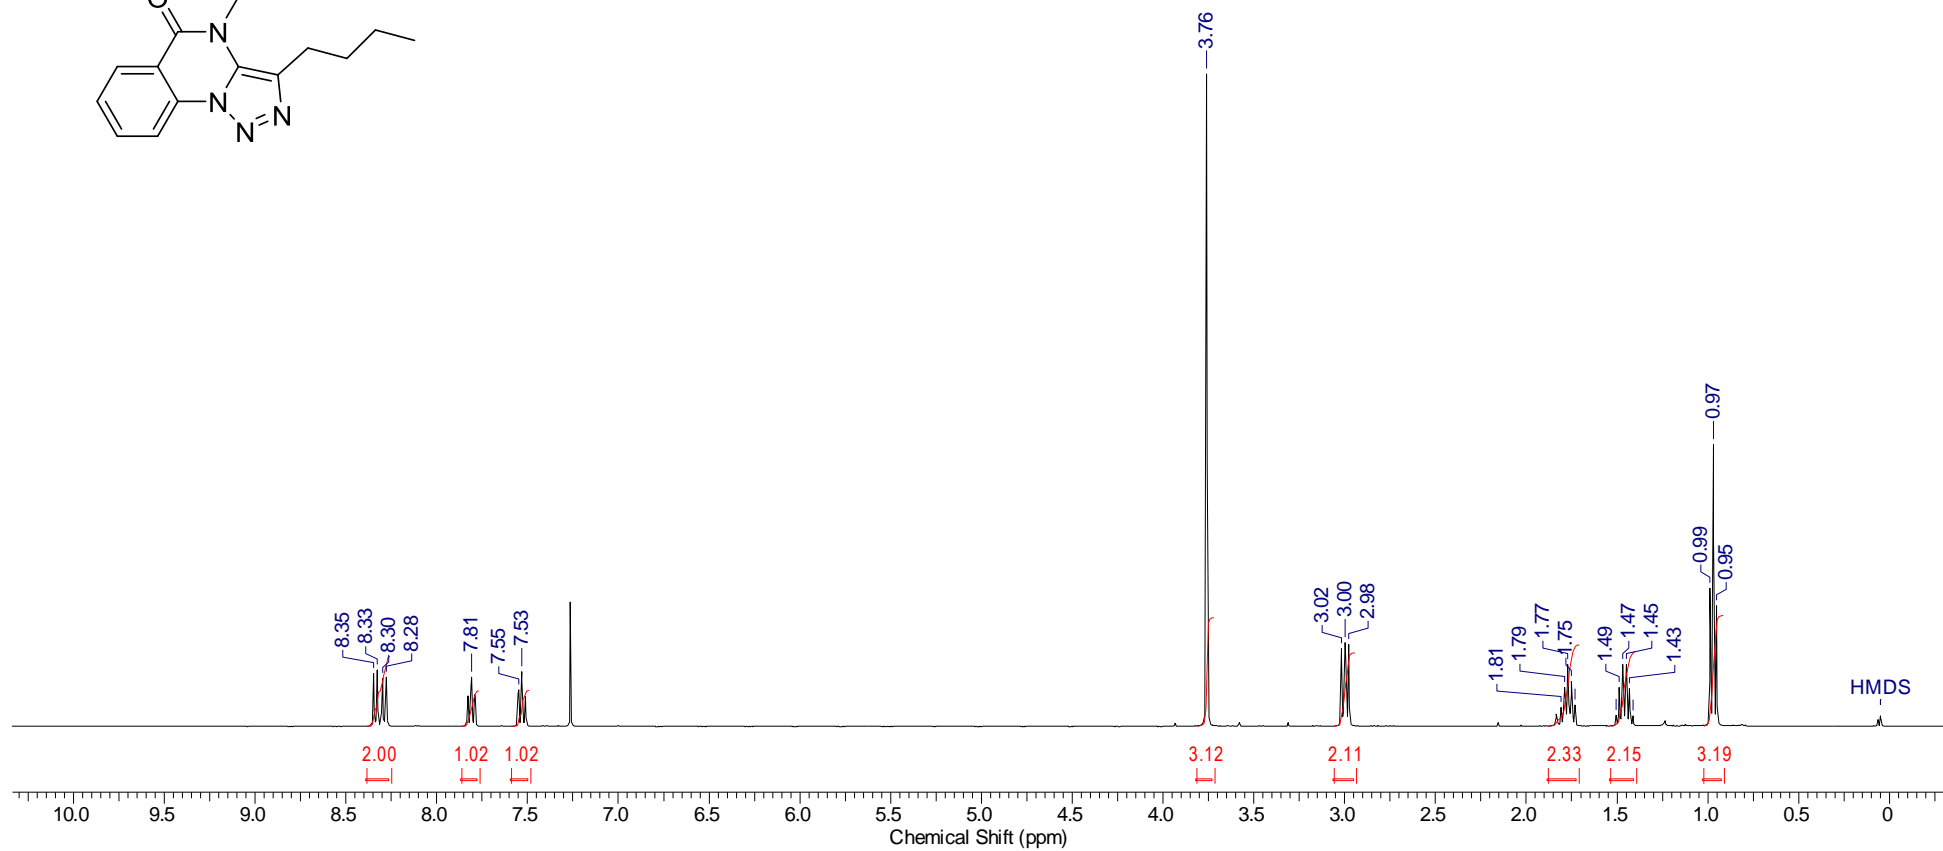

**3-Butyl-4-methyl[1,2,3]triazolo[1,5-a]quinazolin-5(4H)-one (2a)**

$^{13}\text{C}\{^1\text{H}\}$  NMR (100 MHz,  $\text{CDCl}_3$ )

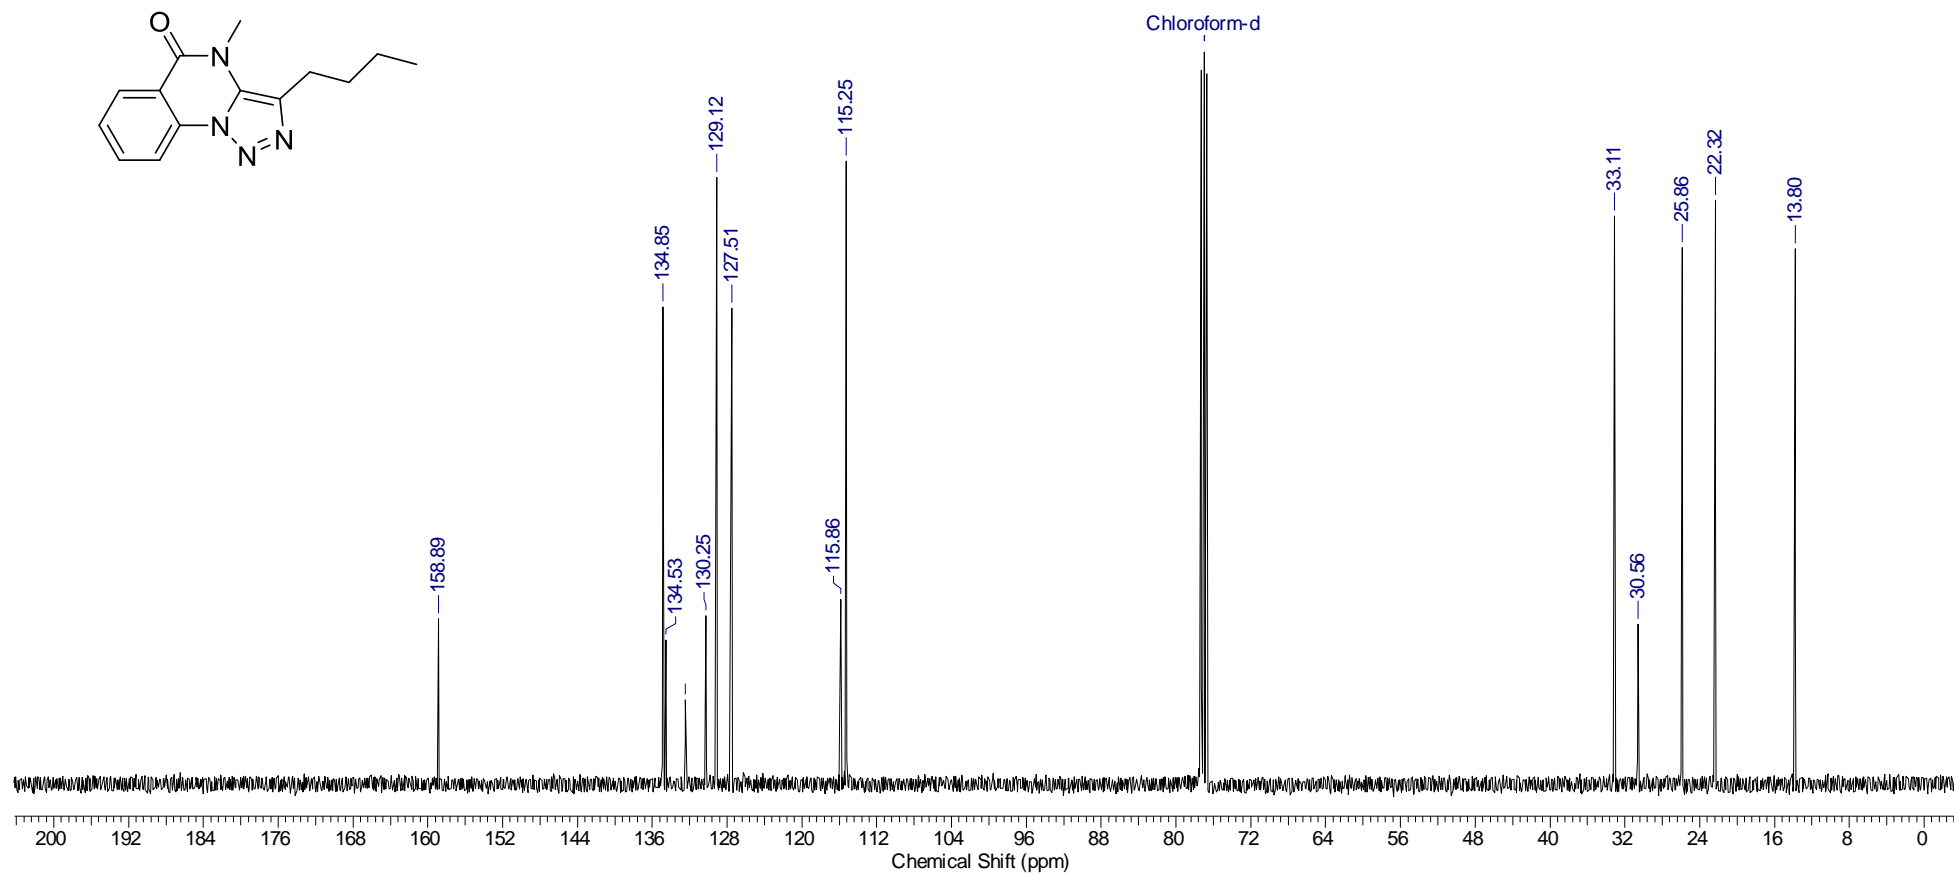

3-Butyl-4-methyl[1,2,3]triazolo[1,5-a]quinazolin-5(4H)-one (2a)

$^1\text{H}$ - $^1\text{H}$  NOESY (600 MHz,  $\text{CDCl}_3$ )

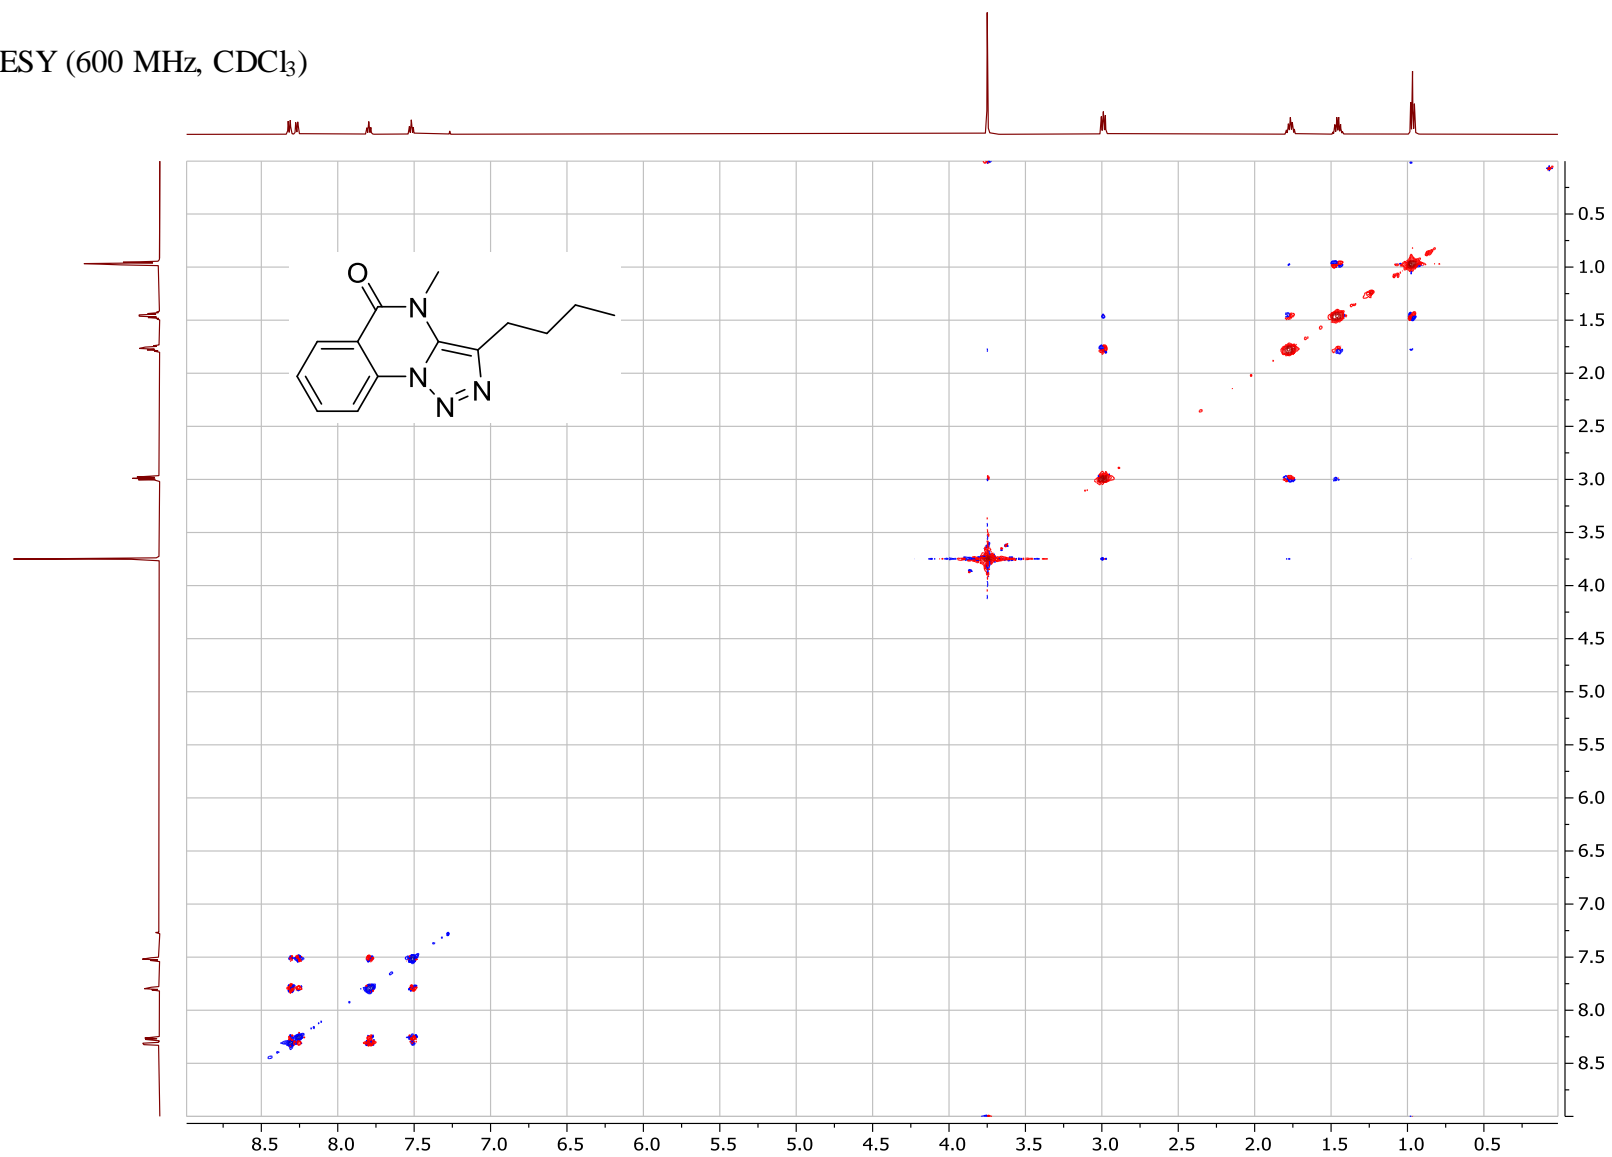

3-Butyl-4-methyl[1,2,3]triazolo[1,5-a]quinazolin-5(4H)-one (2a)

$^1\text{H}$ - $^1\text{H}$  NOESY (600 MHz,  $\text{CDCl}_3$ )

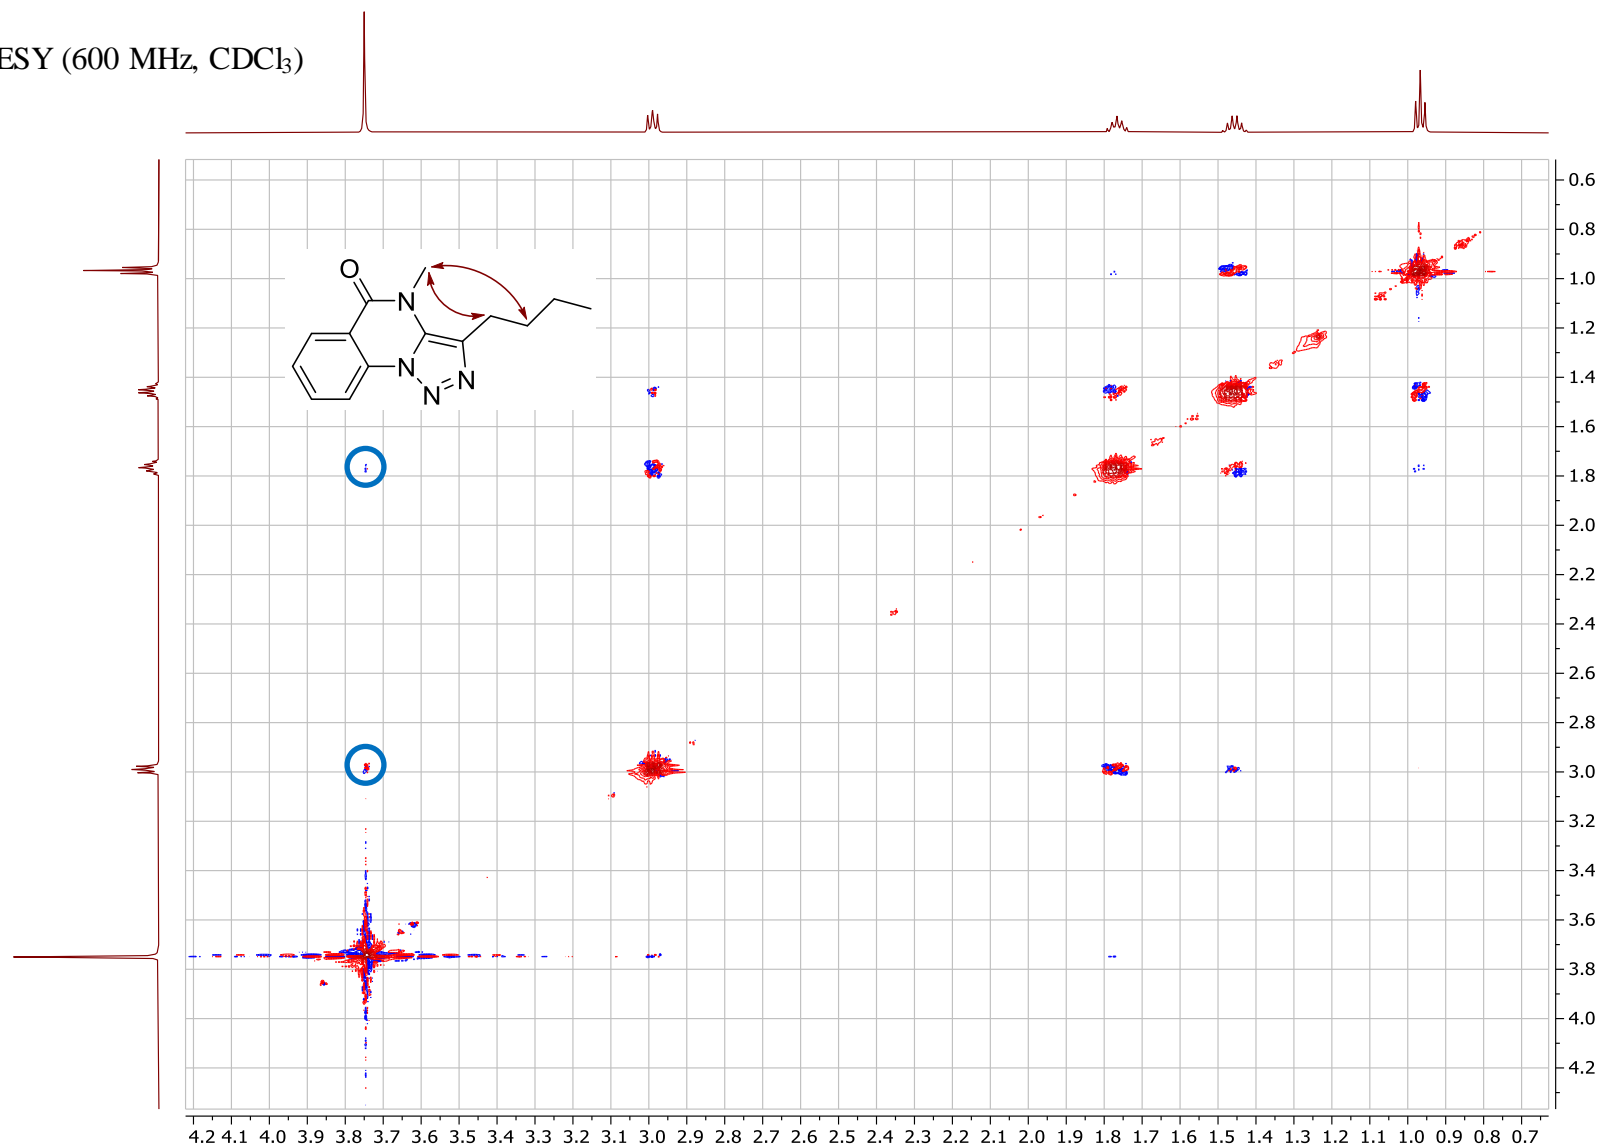

3-Butyl-7-bromo-4-methyl[1,2,3]triazolo[1,5-a]quinazolin-5(4H)-one (2b)

$^1\text{H}$  NMR (400 MHz,  $\text{CDCl}_3$ )

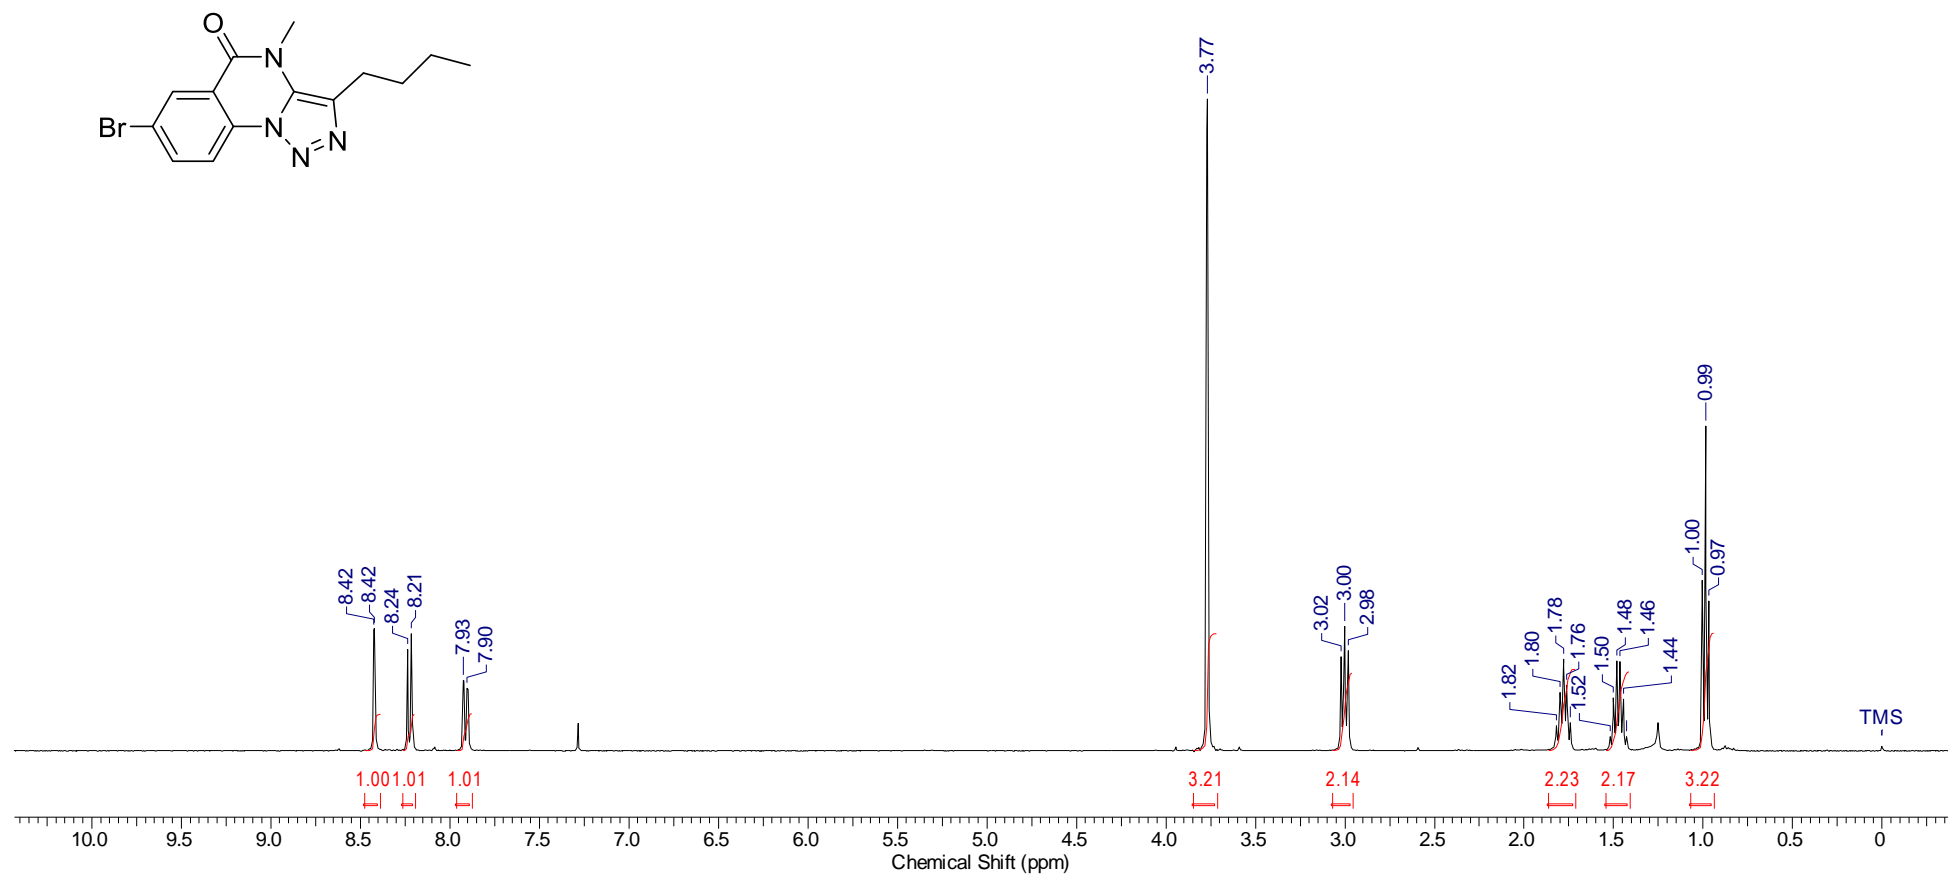



**3-Butyl-7-bromo-4-methyl[1,2,3]triazolo[1,5-*a*]quinazolin-5(4*H*)-one (2b)**

$^{13}\text{C}\{^1\text{H}\}$  NMR (100 MHz,  $\text{CDCl}_3$ )

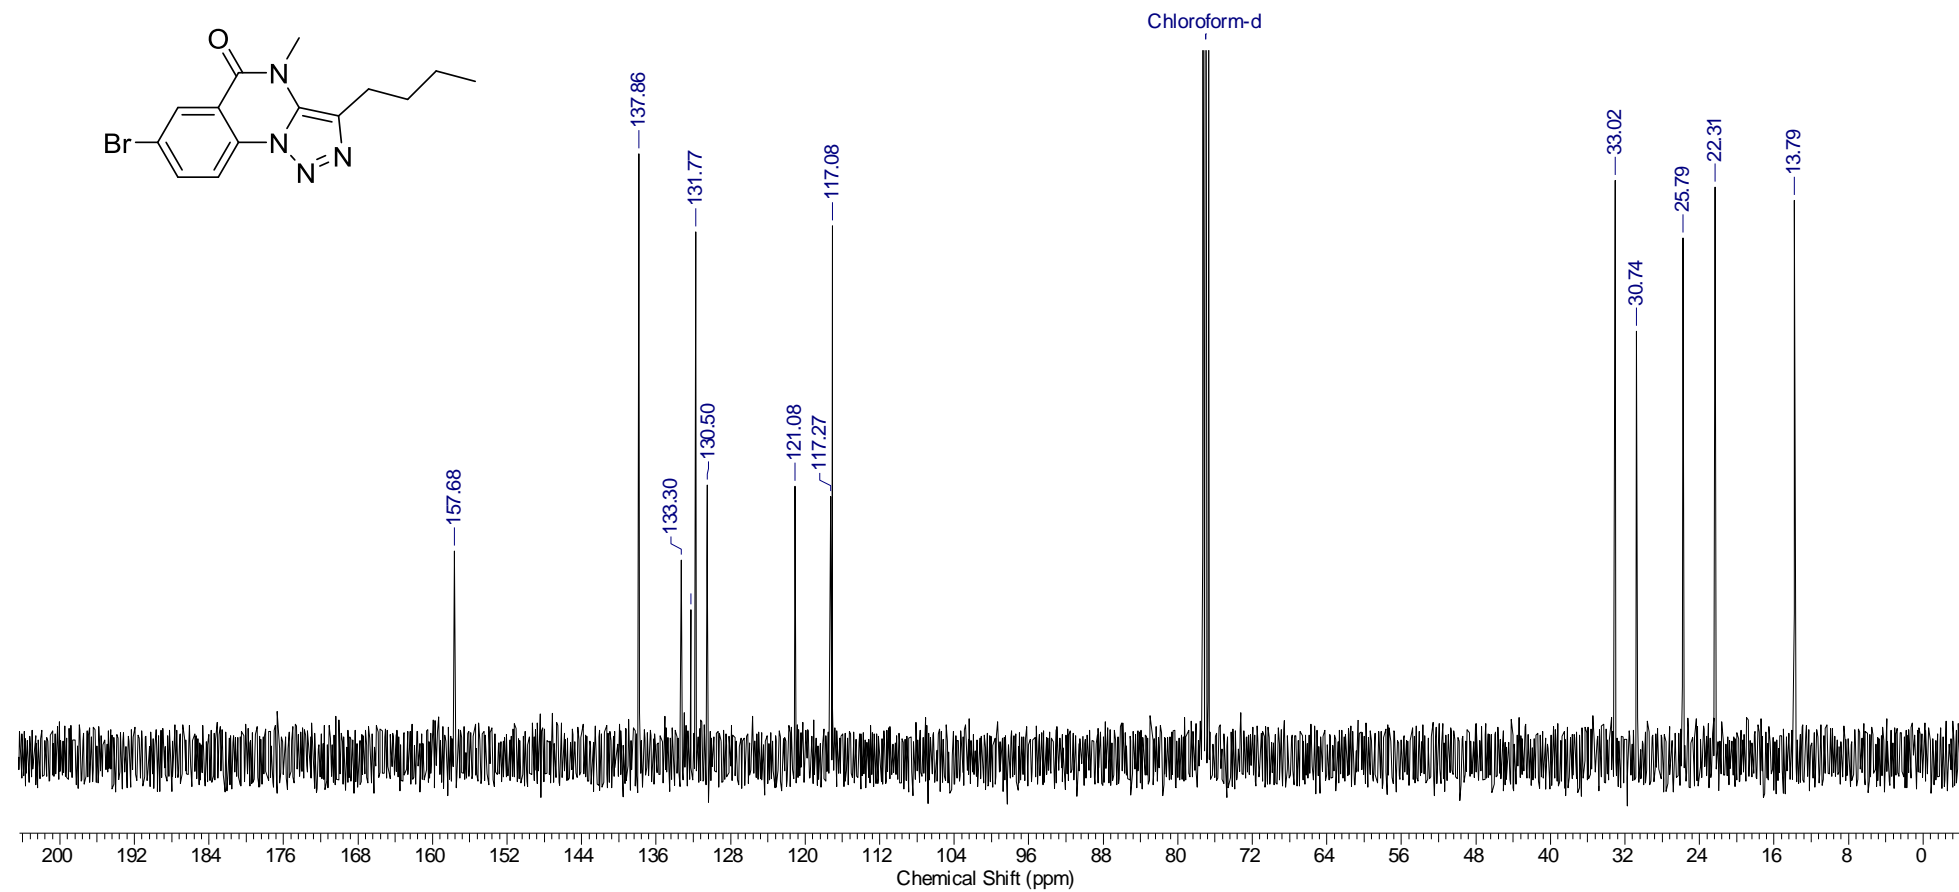

**3-Butyl-7-iodo-4-methyl[1,2,3]triazolo[1,5-*a*]quinazolin-5(4*H*)-one (2c)**

<sup>1</sup>H NMR (400 MHz, CDCl<sub>3</sub>)

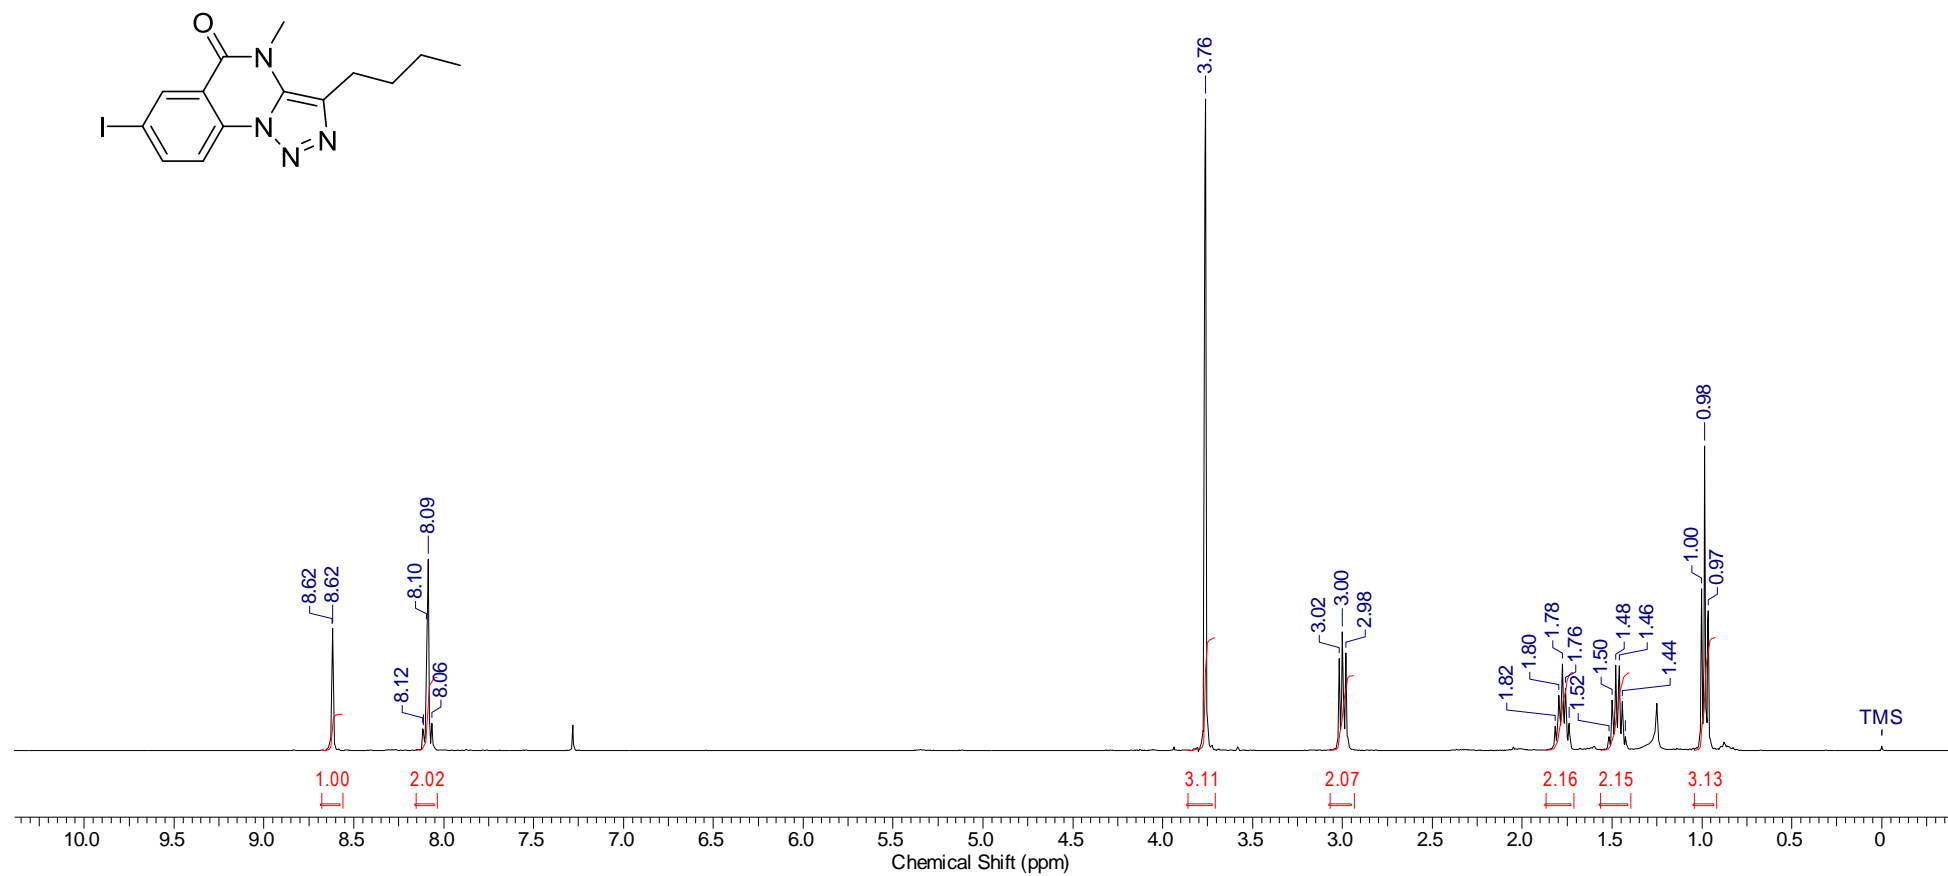

**3-Butyl-7-iodo-4-methyl[1,2,3]triazolo[1,5-a]quinazolin-5(4H)-one (2c)**

$^{13}\text{C}\{^1\text{H}\}$  NMR (100 MHz,  $\text{CDCl}_3$ )

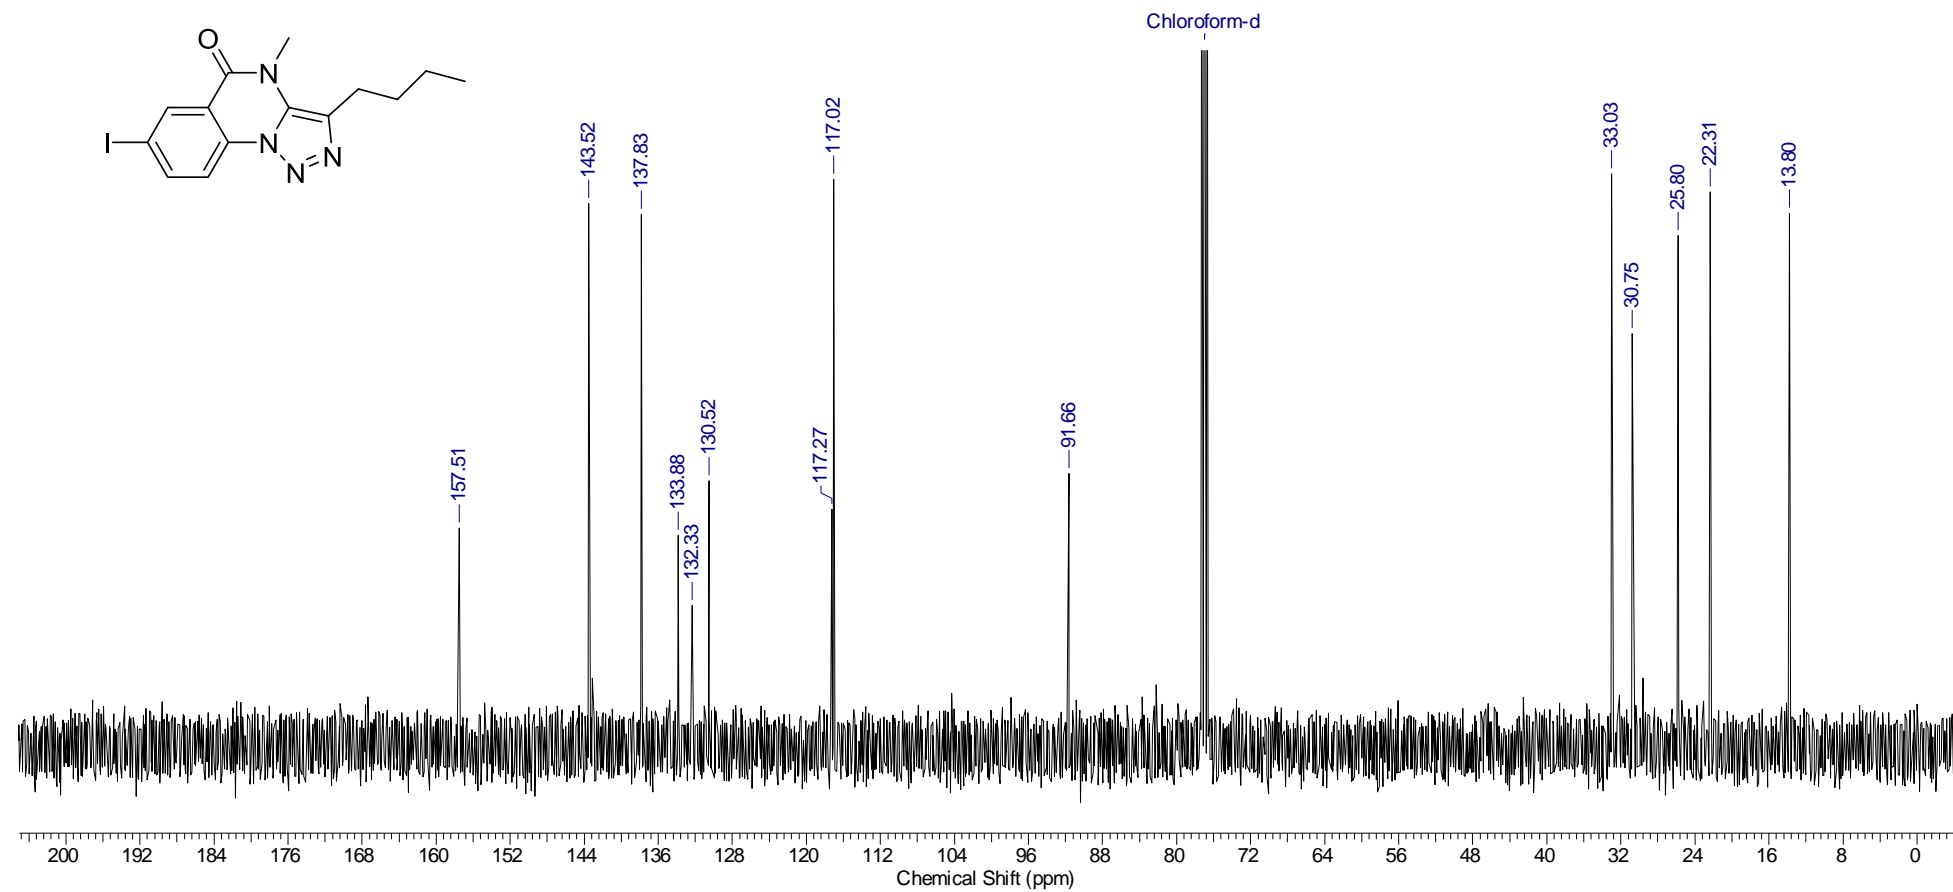

3-Butyl-8-methoxy-4-methyl[1,2,3]triazolo[1,5-a]quinazolin-5(4H)-one (2d)

$^1\text{H}$  NMR (400 MHz,  $\text{CDCl}_3$ )

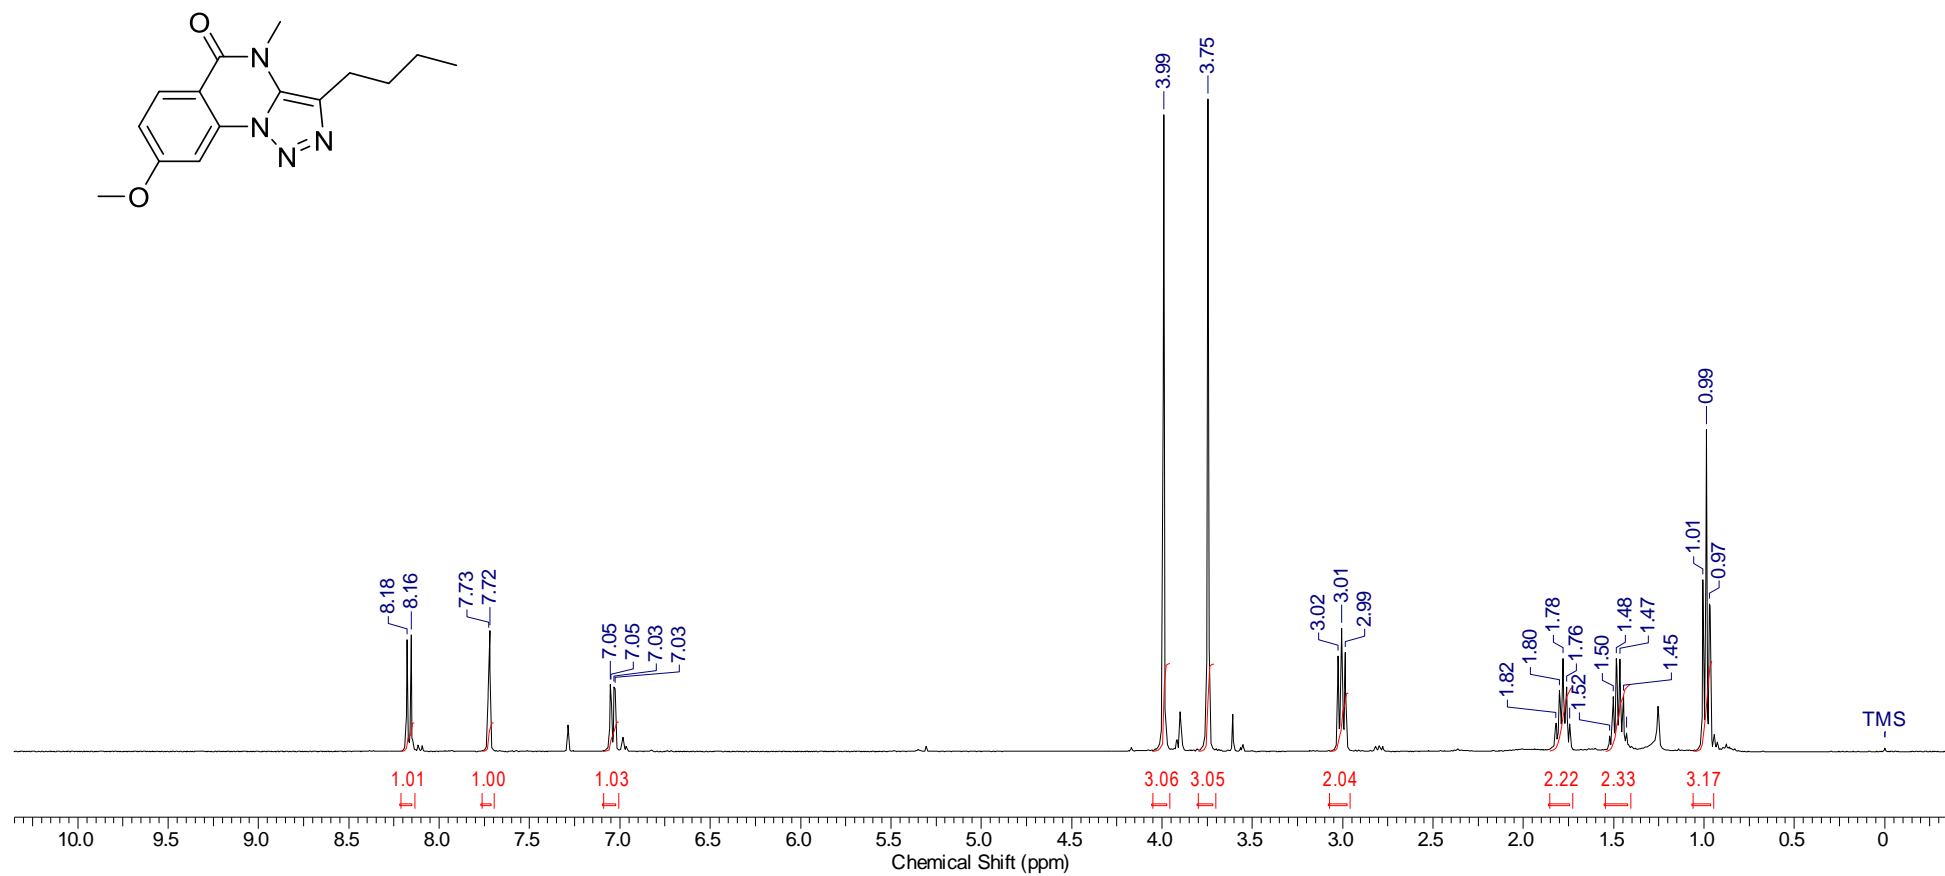

**3-Butyl-8-methoxy-4-methyl[1,2,3]triazolo[1,5-a]quinazolin-5(4H)-one (2d)**

$^{13}\text{C}\{^1\text{H}\}$  NMR (100 MHz,  $\text{CDCl}_3$ )

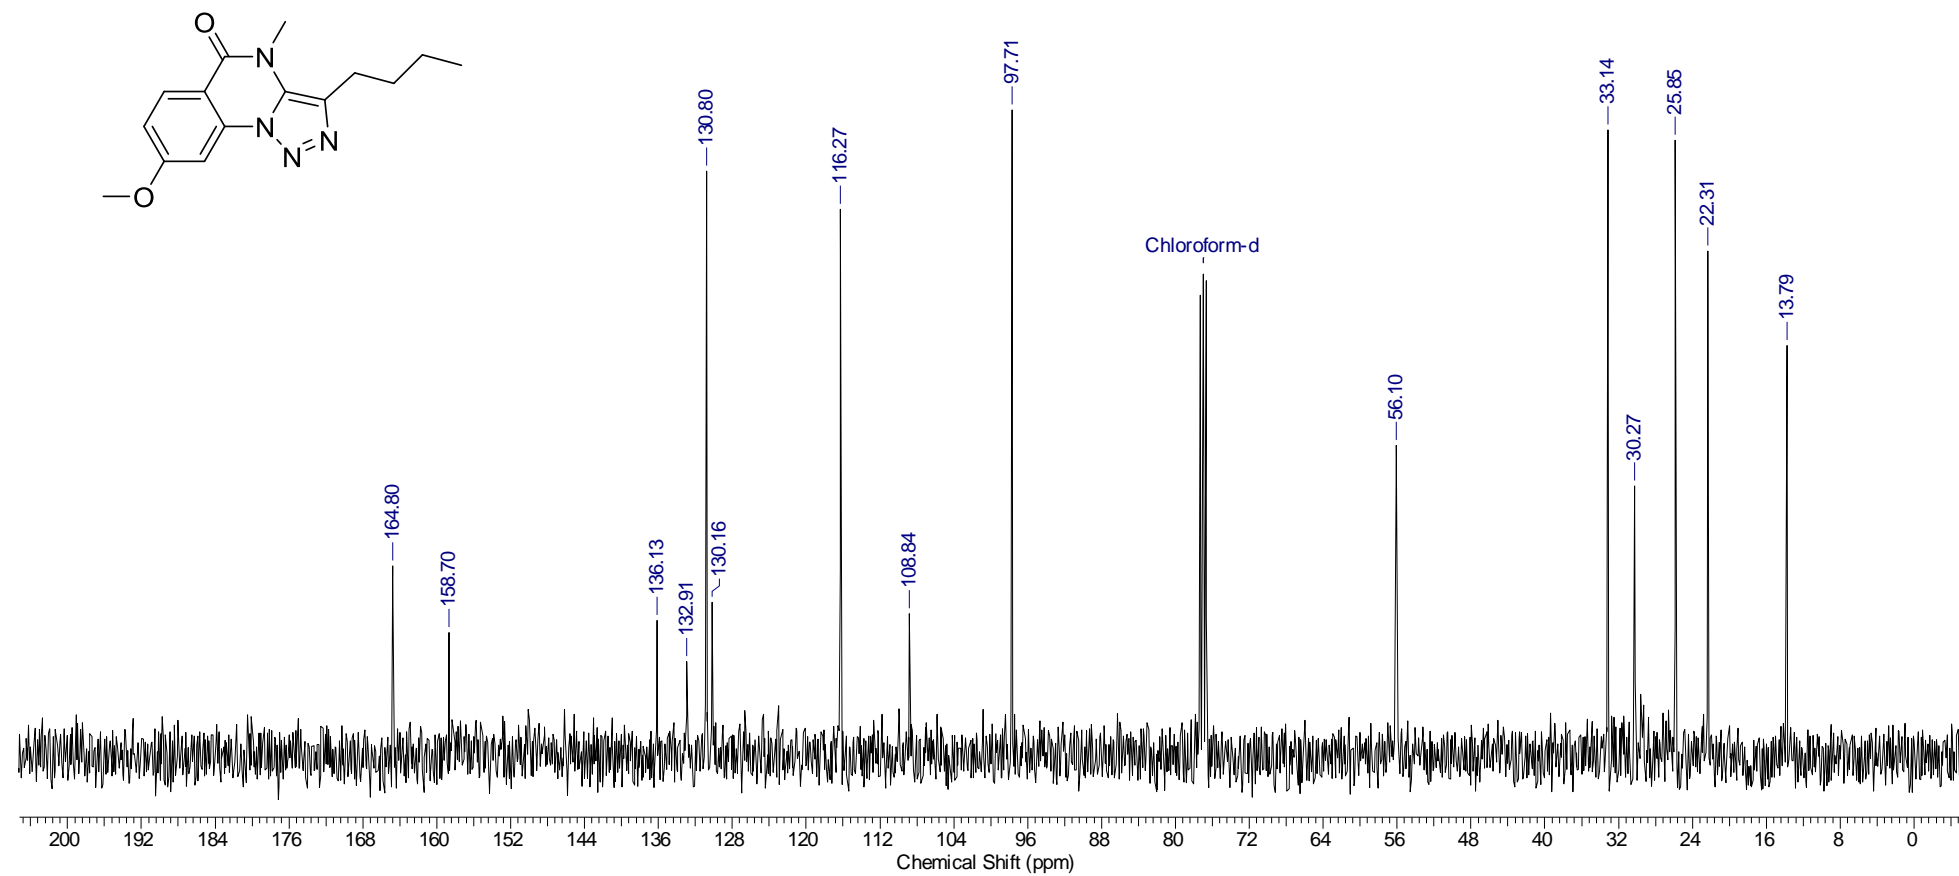

3-Butyl-4,6-dimethyl[1,2,3]triazolo[1,5-a]quinazolin-5(4H)-one (2e)

<sup>1</sup>H NMR (400 MHz, CDCl<sub>3</sub>)

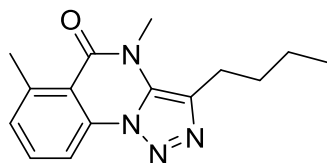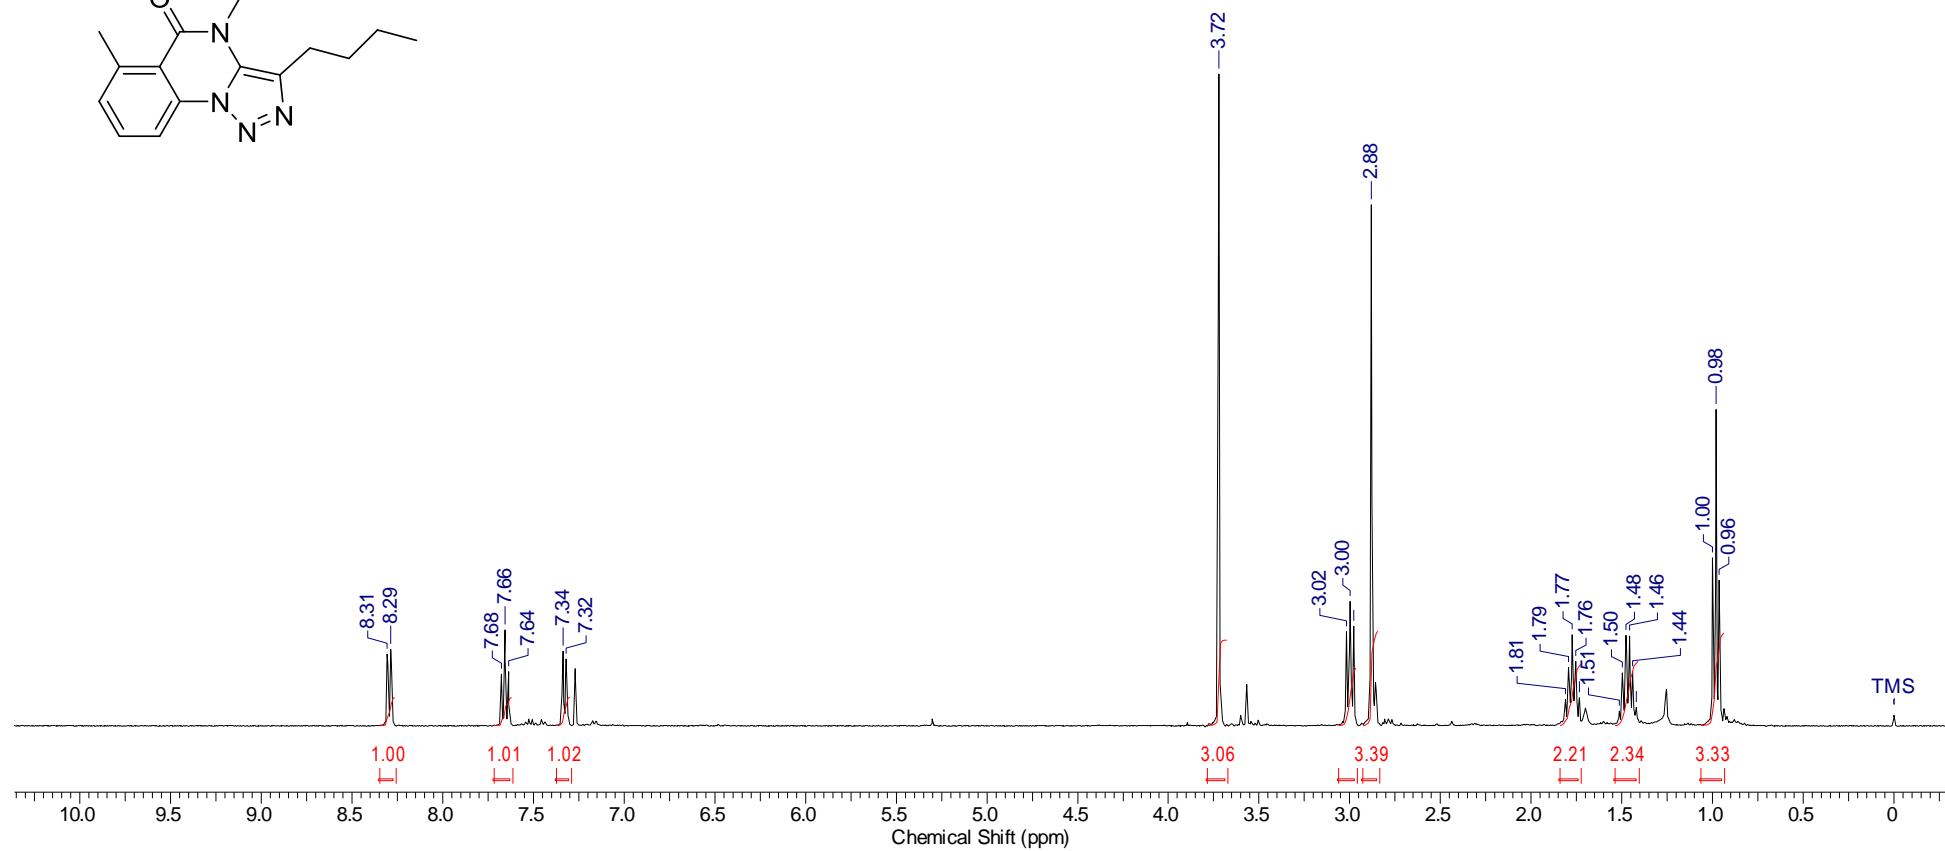

**3-Butyl-4,6-dimethyl[1,2,3]triazolo[1,5-*a*]quinazolin-5(4*H*)-one (2e)**

$^{13}\text{C}\{^1\text{H}\}$  NMR (100 MHz,  $\text{CDCl}_3$ )

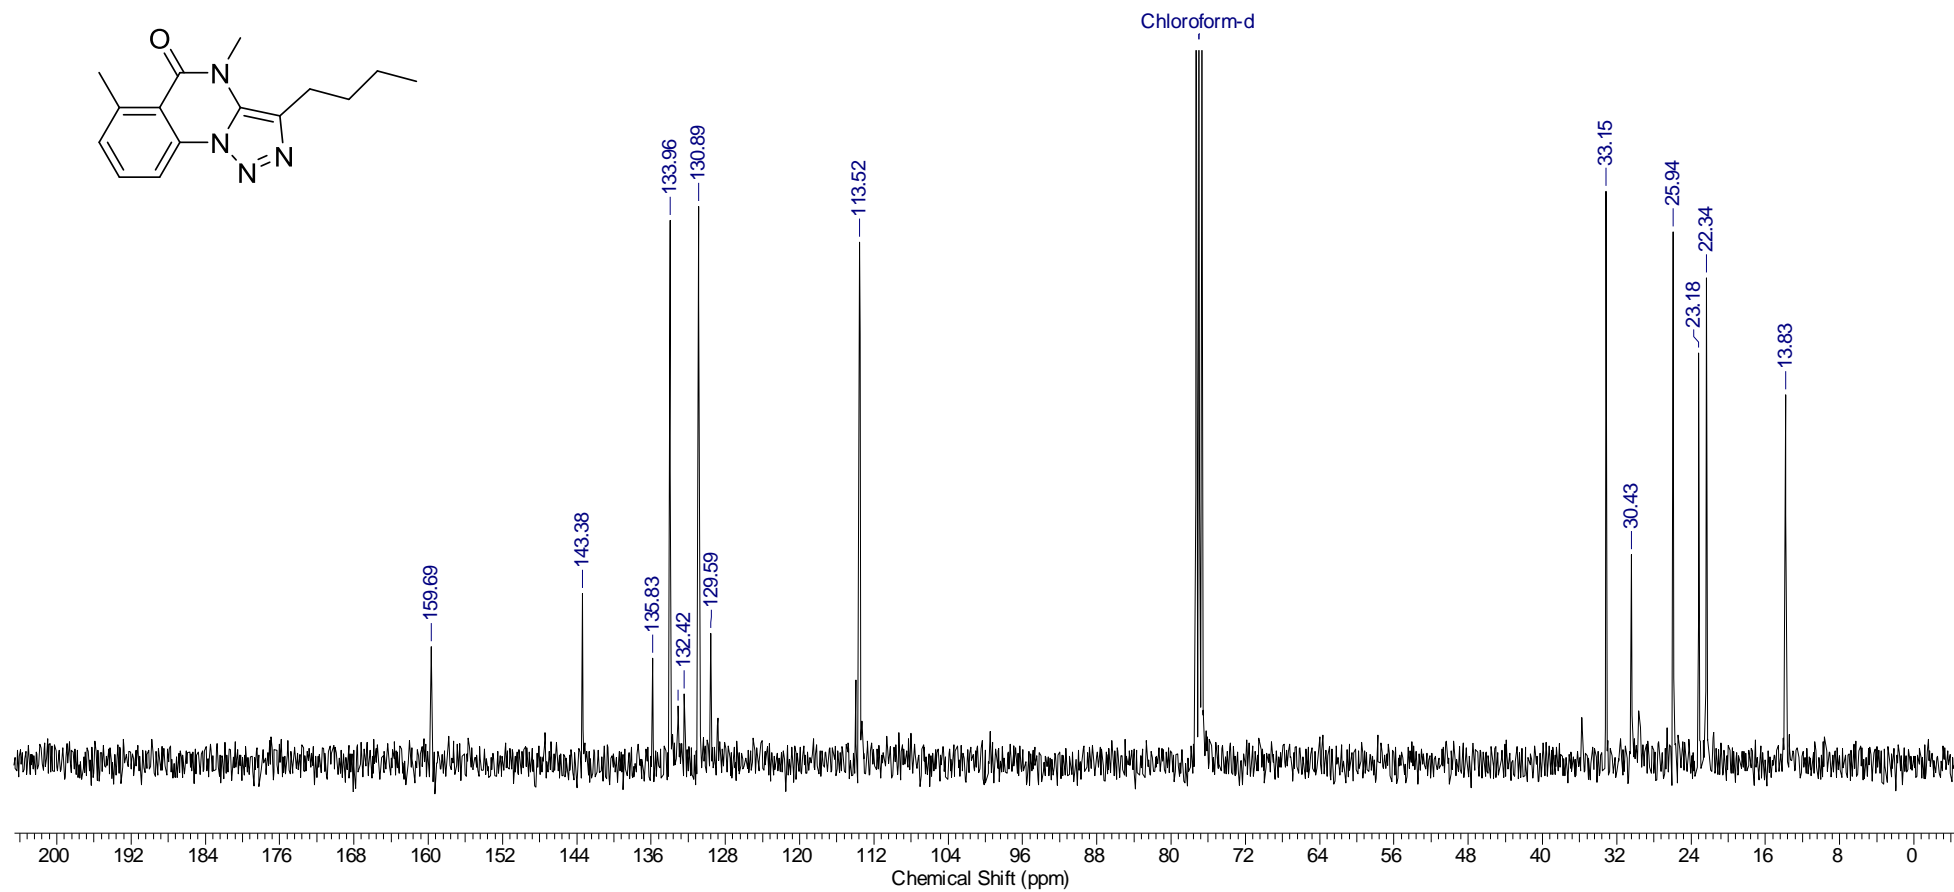

3-Butyl-4,9-dimethyl[1,2,3]triazolo[1,5-a]quinazolin-5(4H)-one (2f)

<sup>1</sup>H NMR (400 MHz, CDCl<sub>3</sub>)

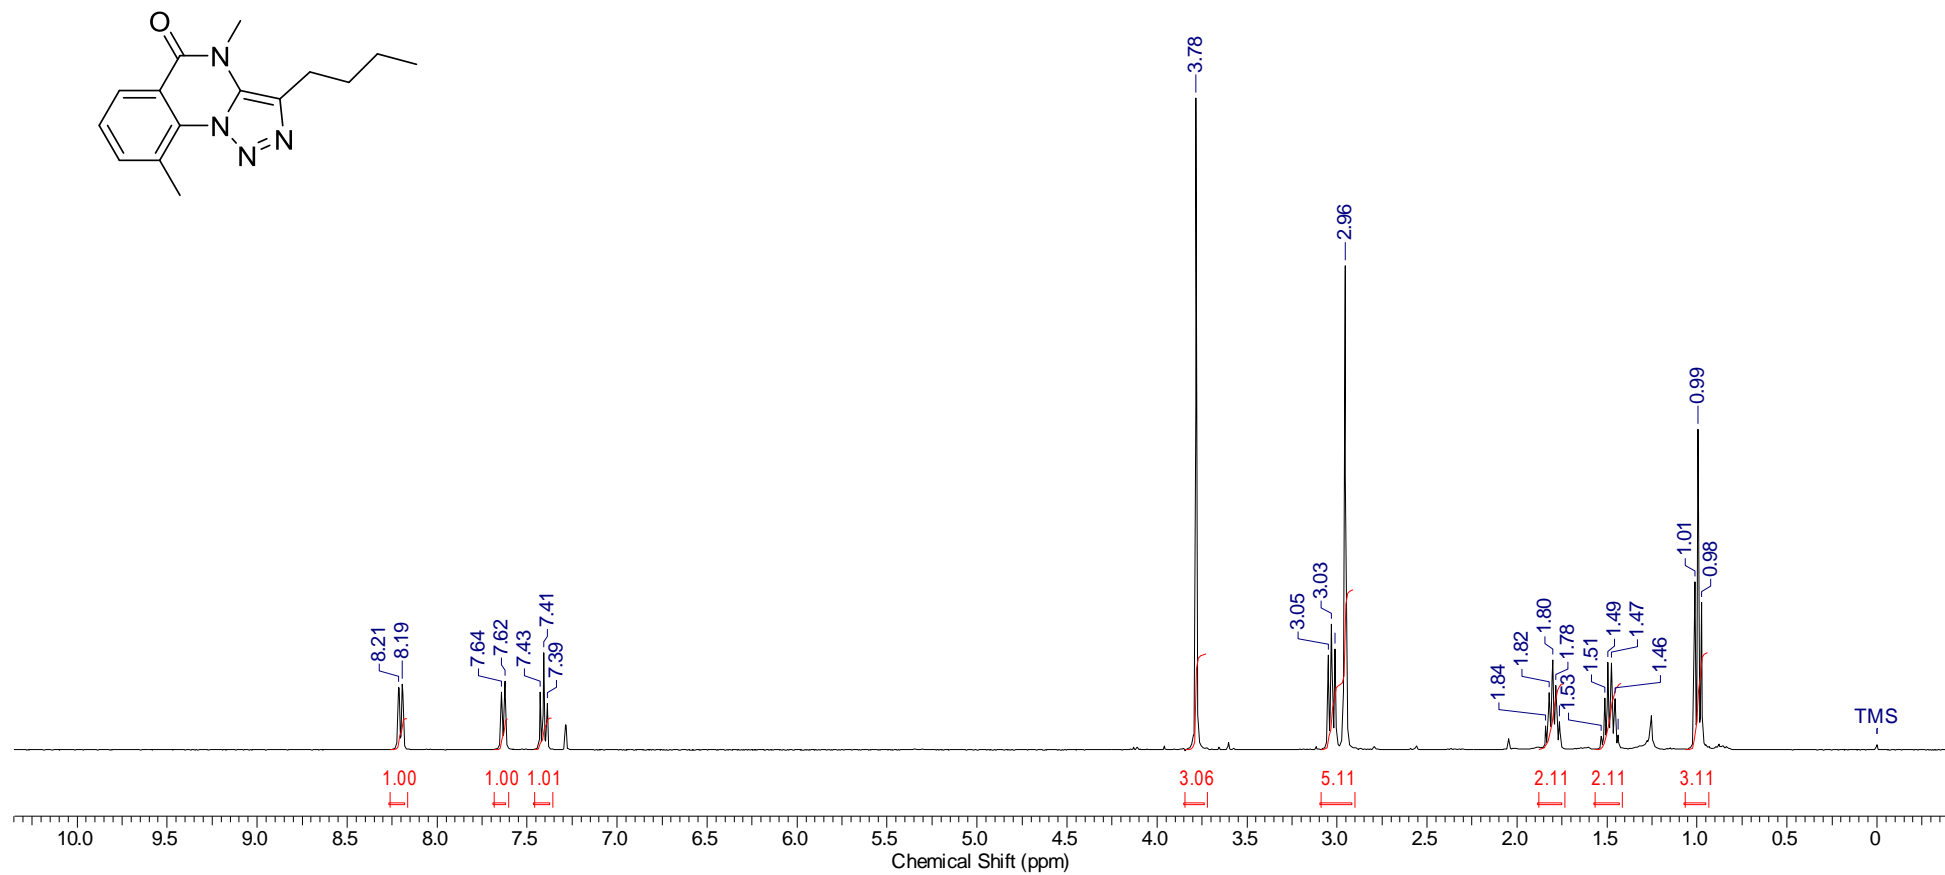



3-Butyl-4,9-dimethyl[1,2,3]triazolo[1,5-a]quinazolin-5(4H)-one (2f)

$^{13}\text{C}\{^1\text{H}\}$  NMR (100 MHz,  $\text{CDCl}_3$ )

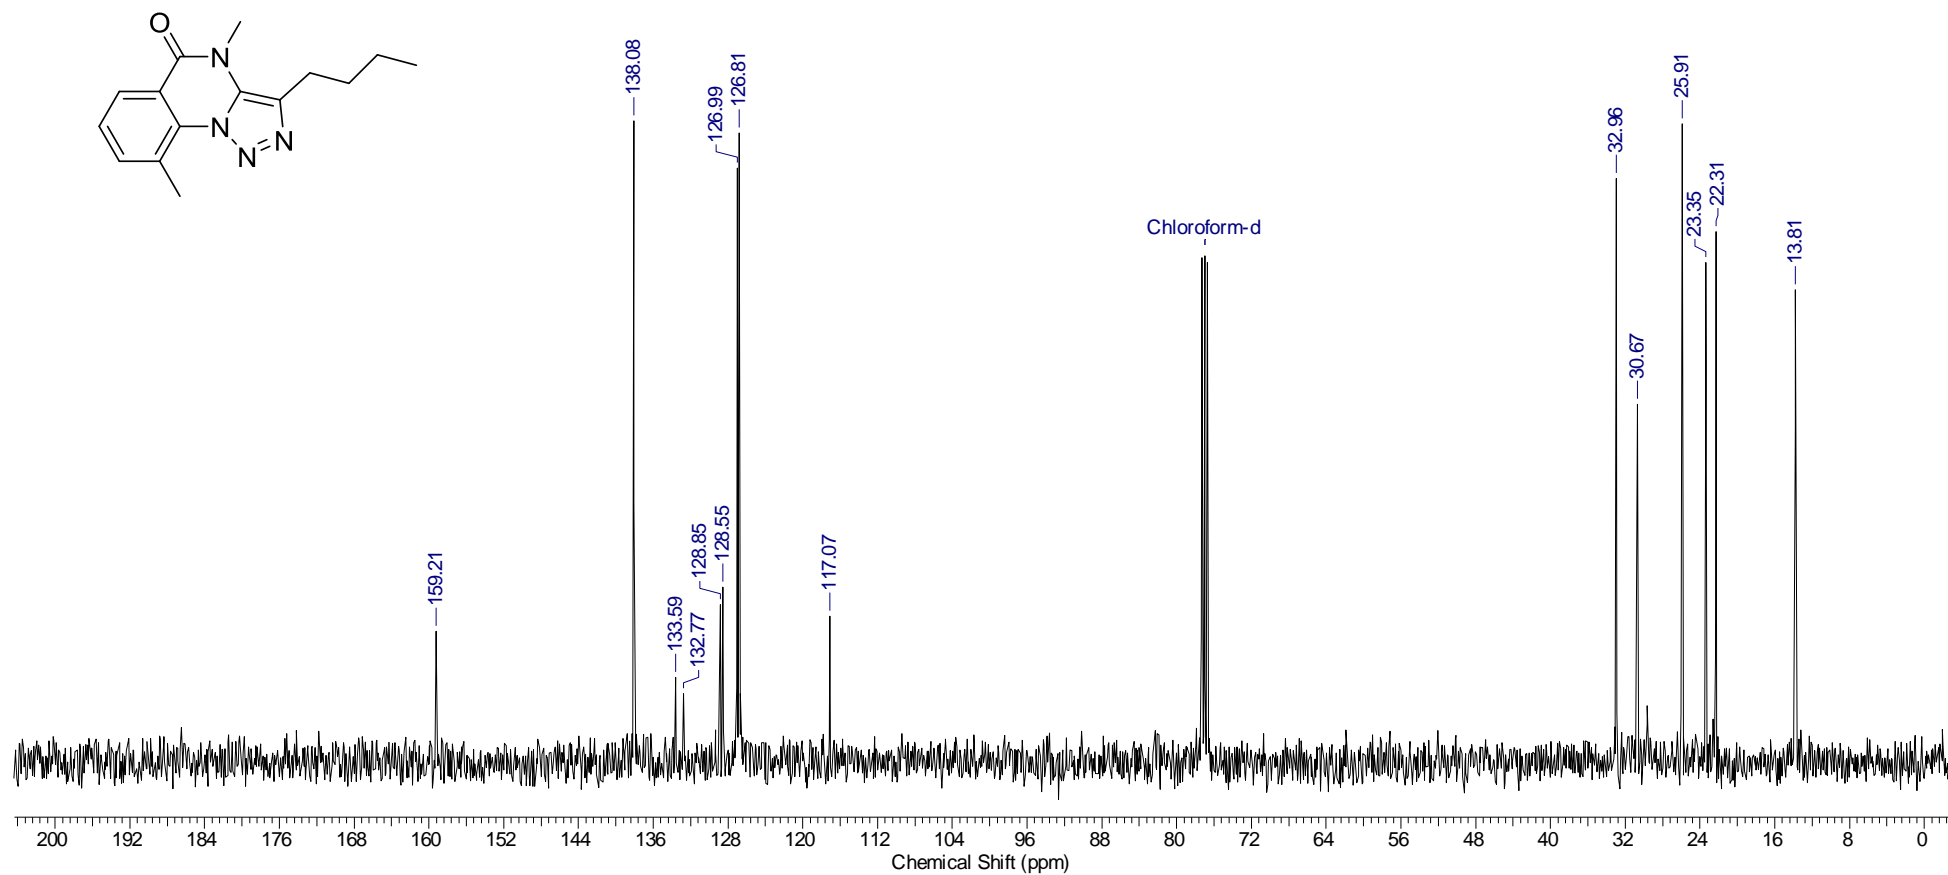

**3-*tert*-Butyl-4-methyl[1,2,3]triazolo[1,5-*a*]quinazolin-5(4*H*)-one (2g)**

<sup>1</sup>H NMR (400 MHz, CDCl<sub>3</sub>)

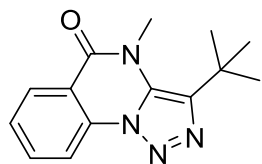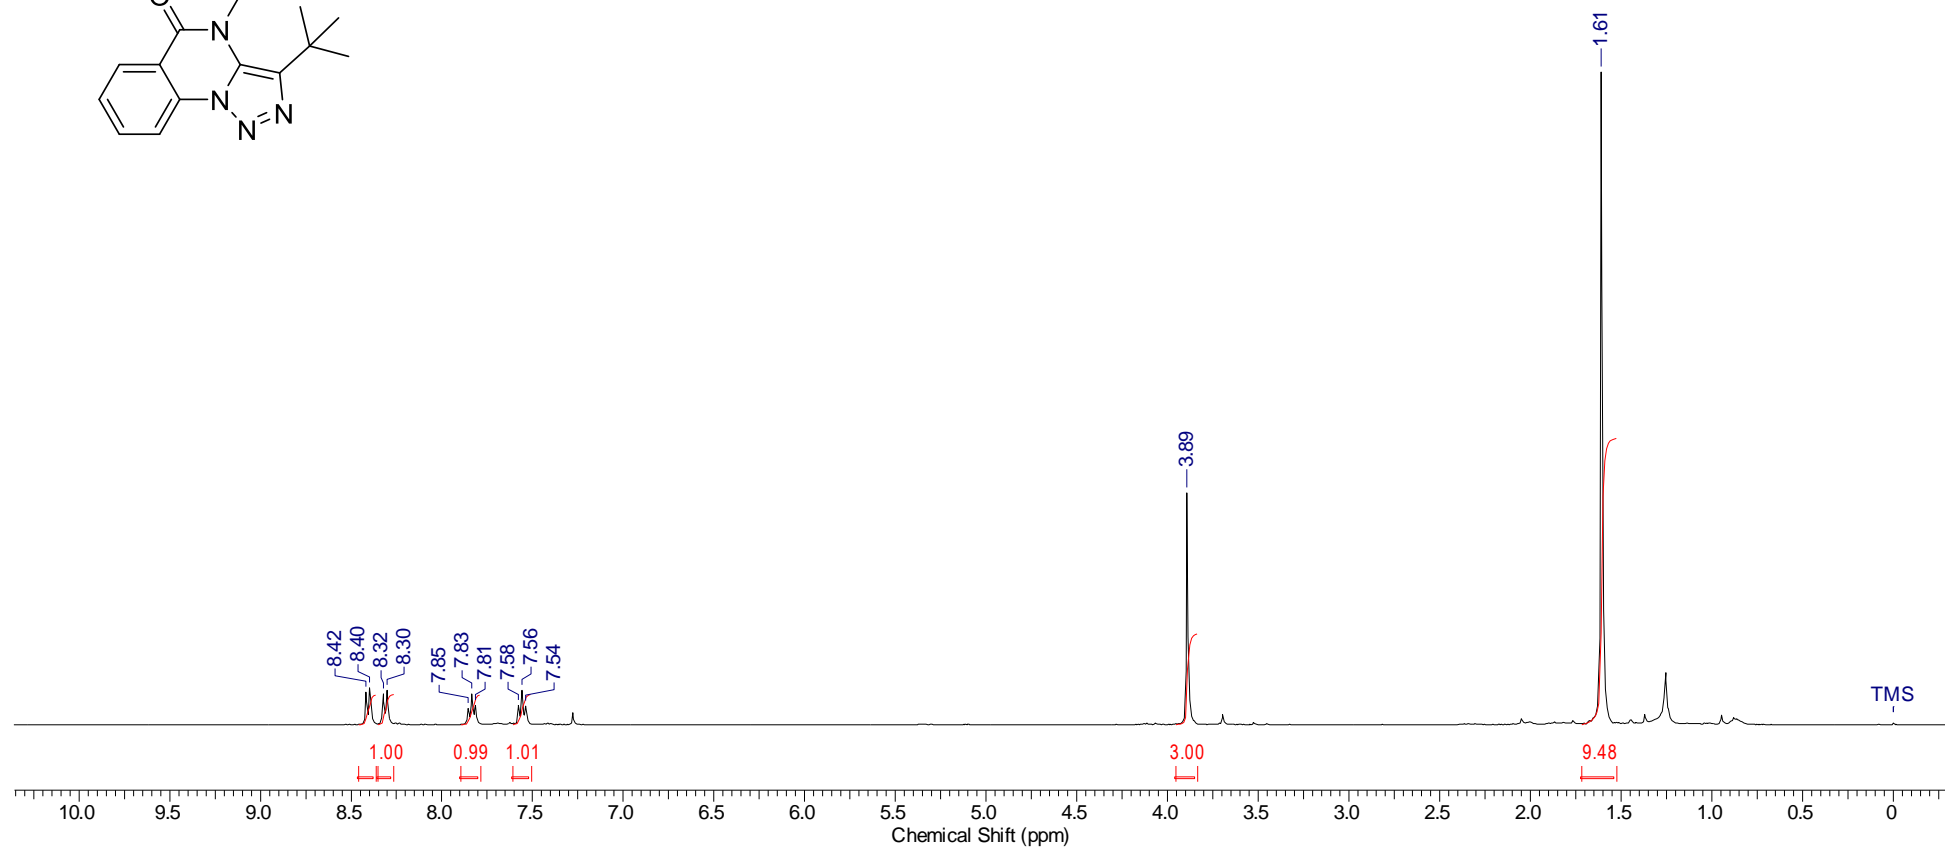

**3-*tert*-Butyl-4-methyl[1,2,3]triazolo[1,5-*a*]quinazolin-5(4*H*)-one (2g)**

$^{13}\text{C}\{^1\text{H}\}$  NMR (100 MHz,  $\text{CDCl}_3$ )

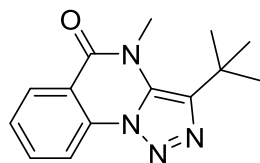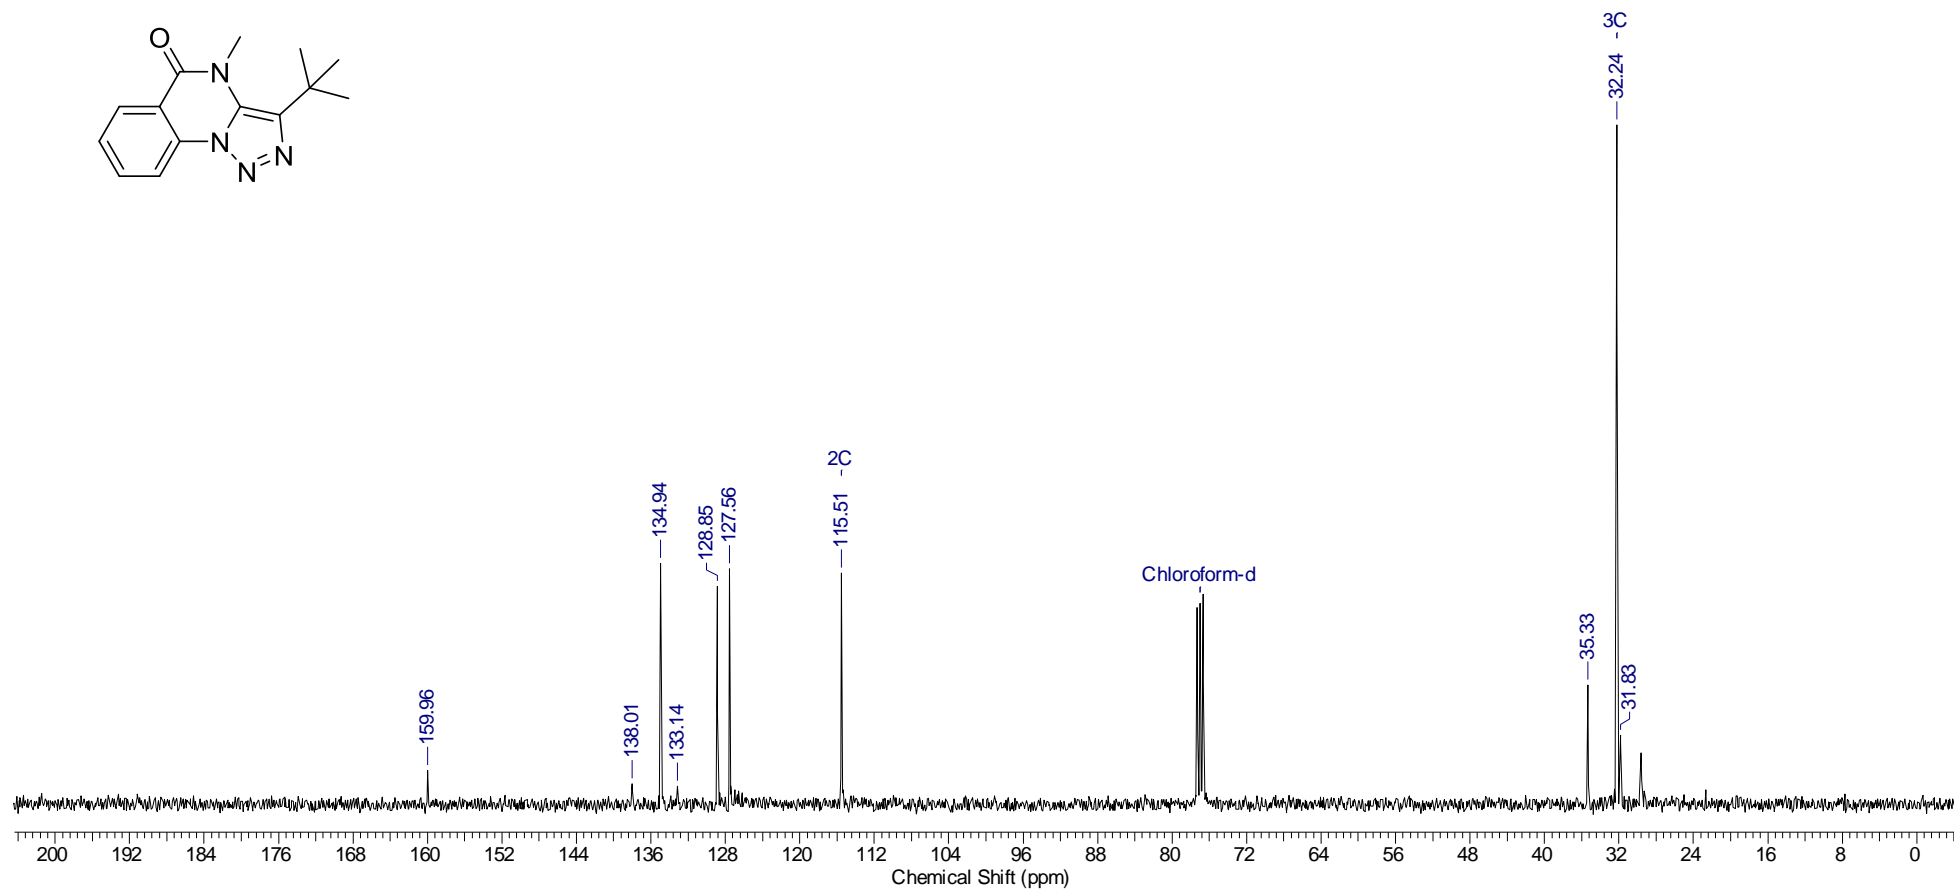

4-Methyl-3-phenyl[1,2,3]triazolo[1,5-*a*]quinazolin-5(4*H*)-one (2h)

<sup>1</sup>H NMR (400 MHz, CDCl<sub>3</sub>)

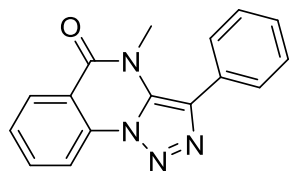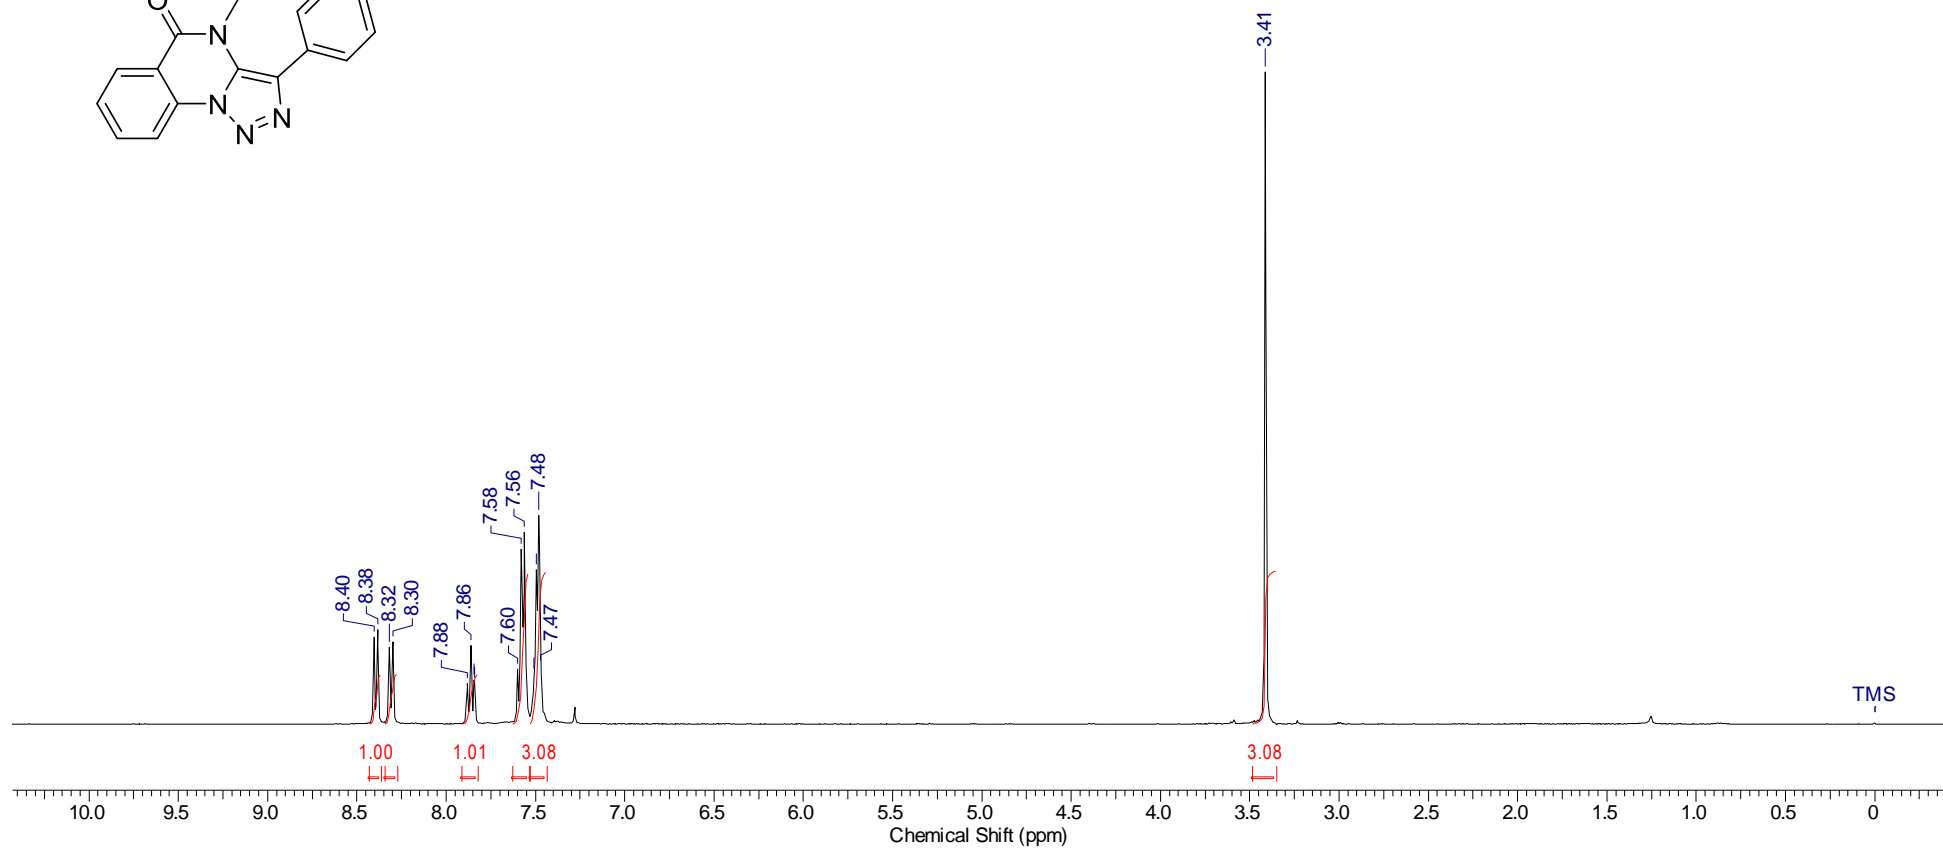

4-Methyl-3-phenyl[1,2,3]triazolo[1,5-*a*]quinazolin-5(4*H*)-one (2h)

$^{13}\text{C}\{^1\text{H}\}$  NMR (100 MHz,  $\text{CDCl}_3$ )

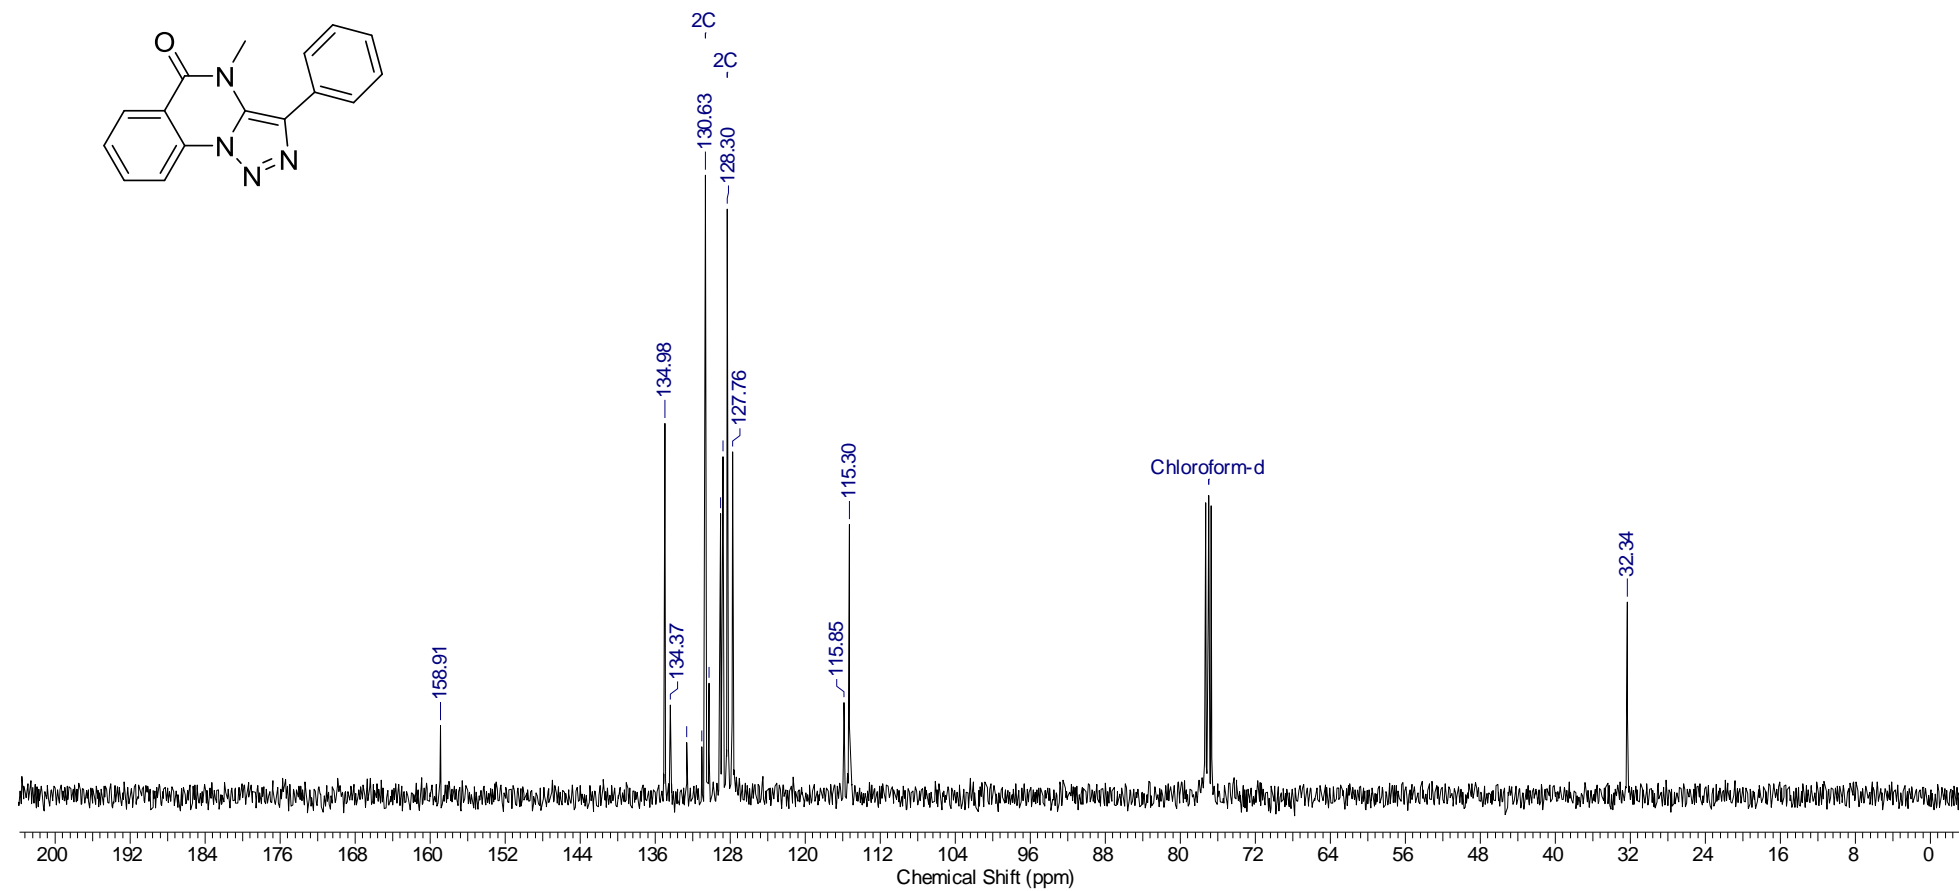

4-Methyl-3-[2-(trifluoromethyl)phenyl][1,2,3]triazolo[1,5-*a*]quinazolin-5(4*H*)-one (2i)

<sup>1</sup>H NMR (400 MHz, CDCl<sub>3</sub>)

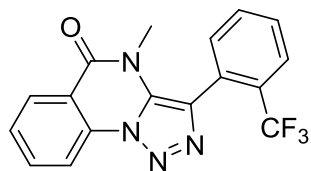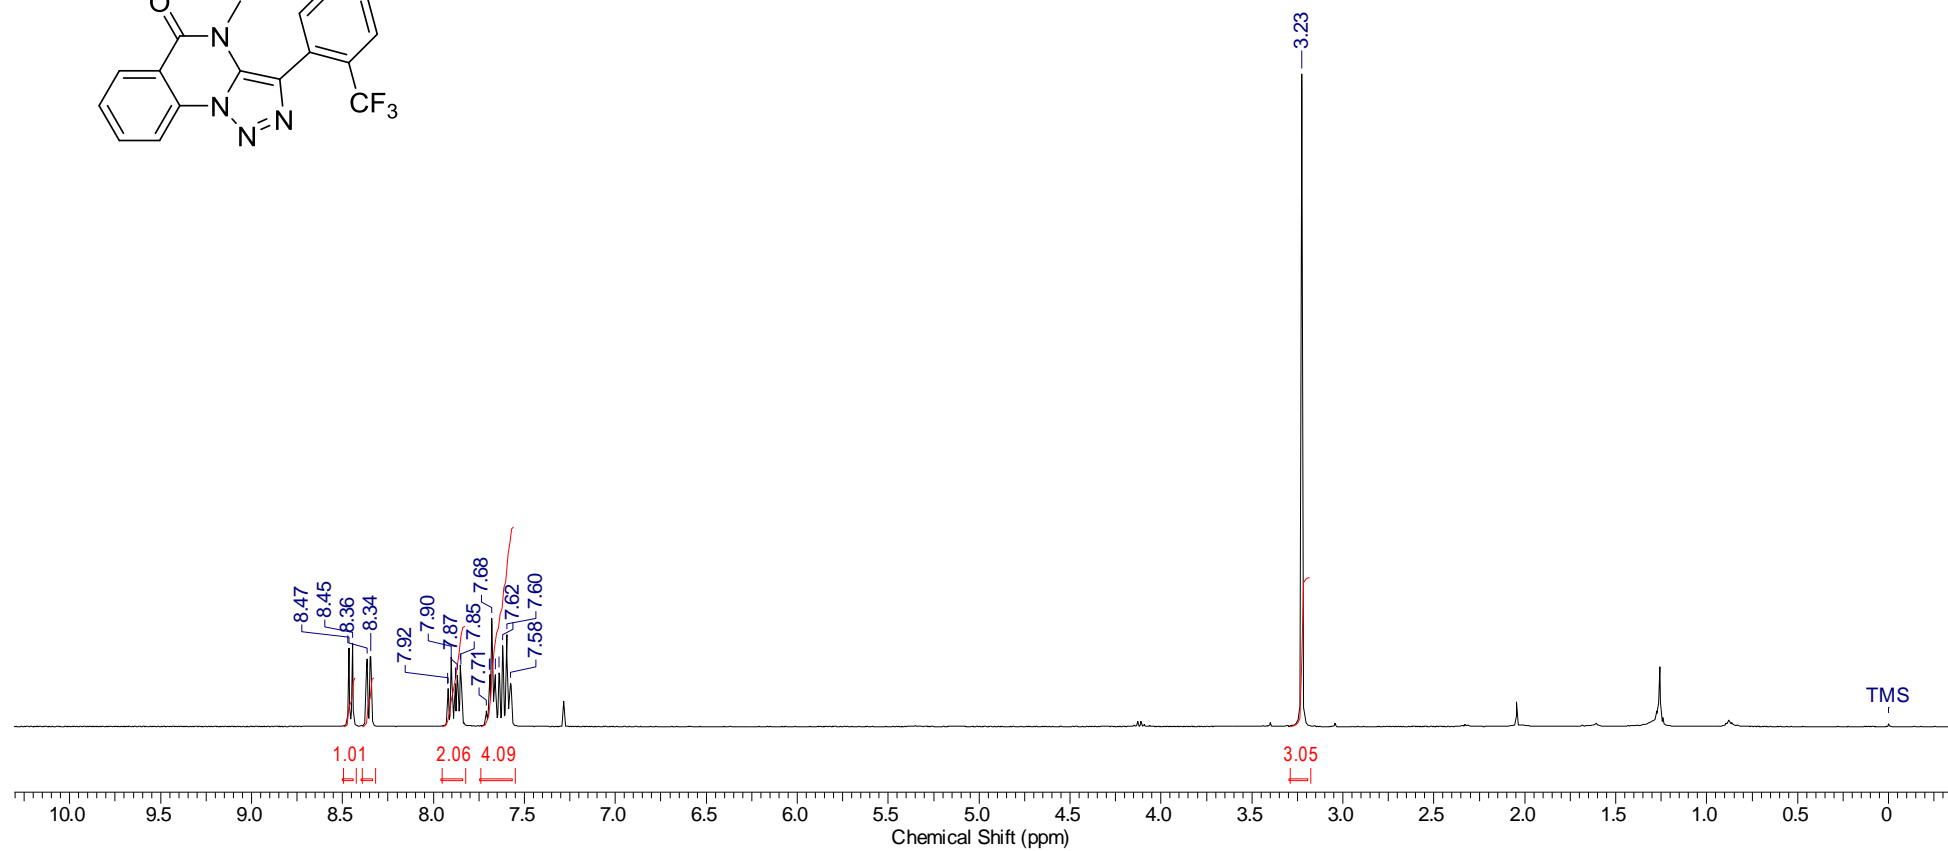

4-Methyl-3-[2-(trifluoromethyl)phenyl][1,2,3]triazolo[1,5-a]quinazolin-5(4H)-one (2i)

$^{13}\text{C}\{^1\text{H}\}$  NMR (100 MHz,  $\text{CDCl}_3$ )

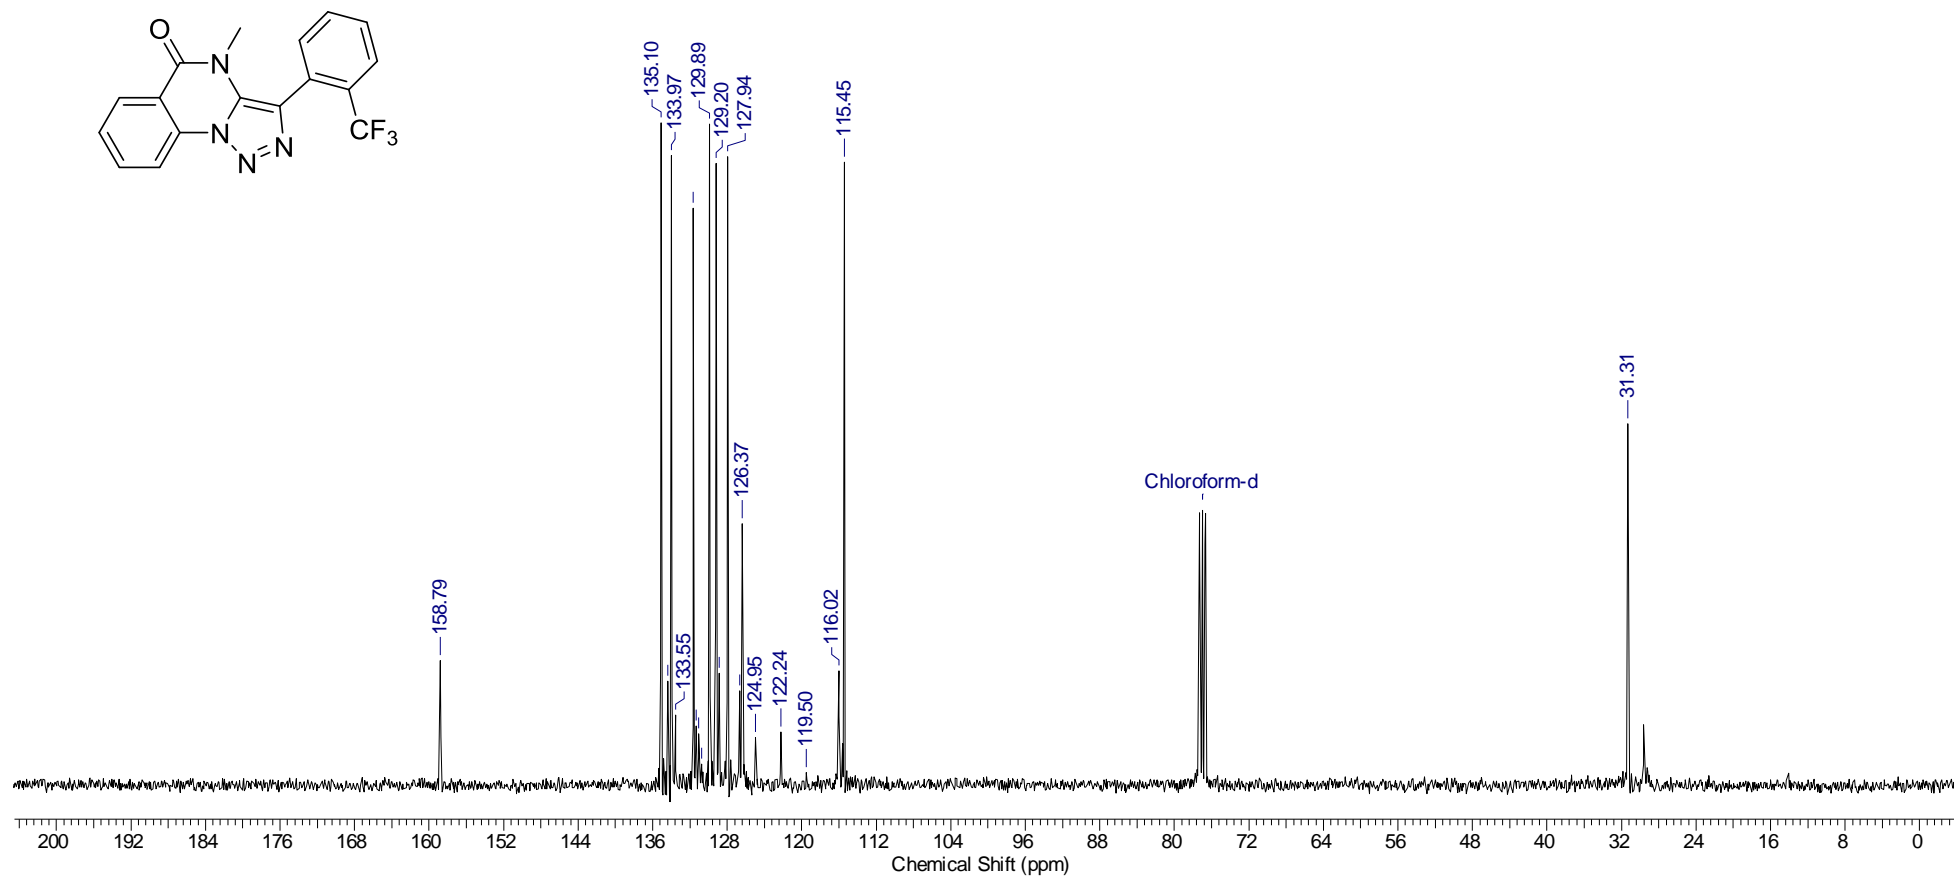

4-Methyl[1,2,3]triazolo[1,5-*a*]quinazolin-5(4*H*)-one (2j)

<sup>1</sup>H NMR (400 MHz, CDCl<sub>3</sub>-CD<sub>3</sub>OD)

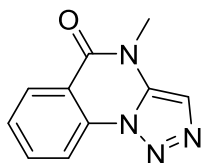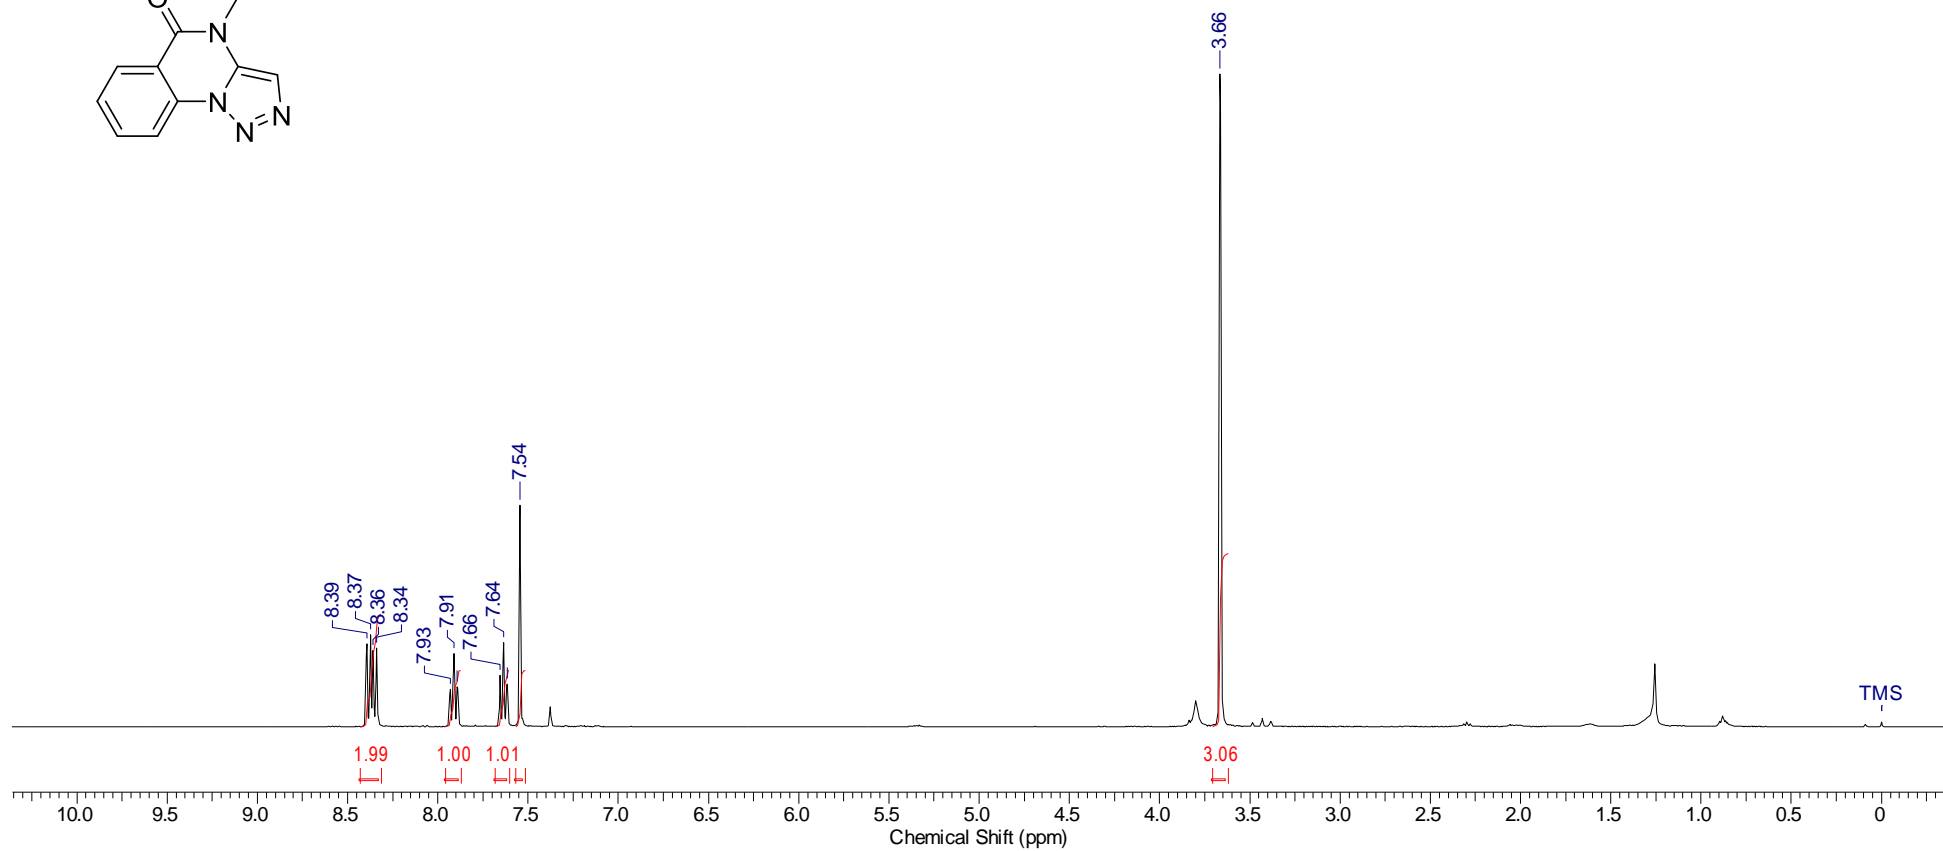



### 4-Methyl[1,2,3]triazolo[1,5-a]quinazolin-5(4H)-one (2j)

$^{13}\text{C}\{^1\text{H}\}$  NMR (100 MHz,  $\text{CDCl}_3\text{-CD}_3\text{OD}$ )

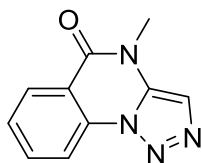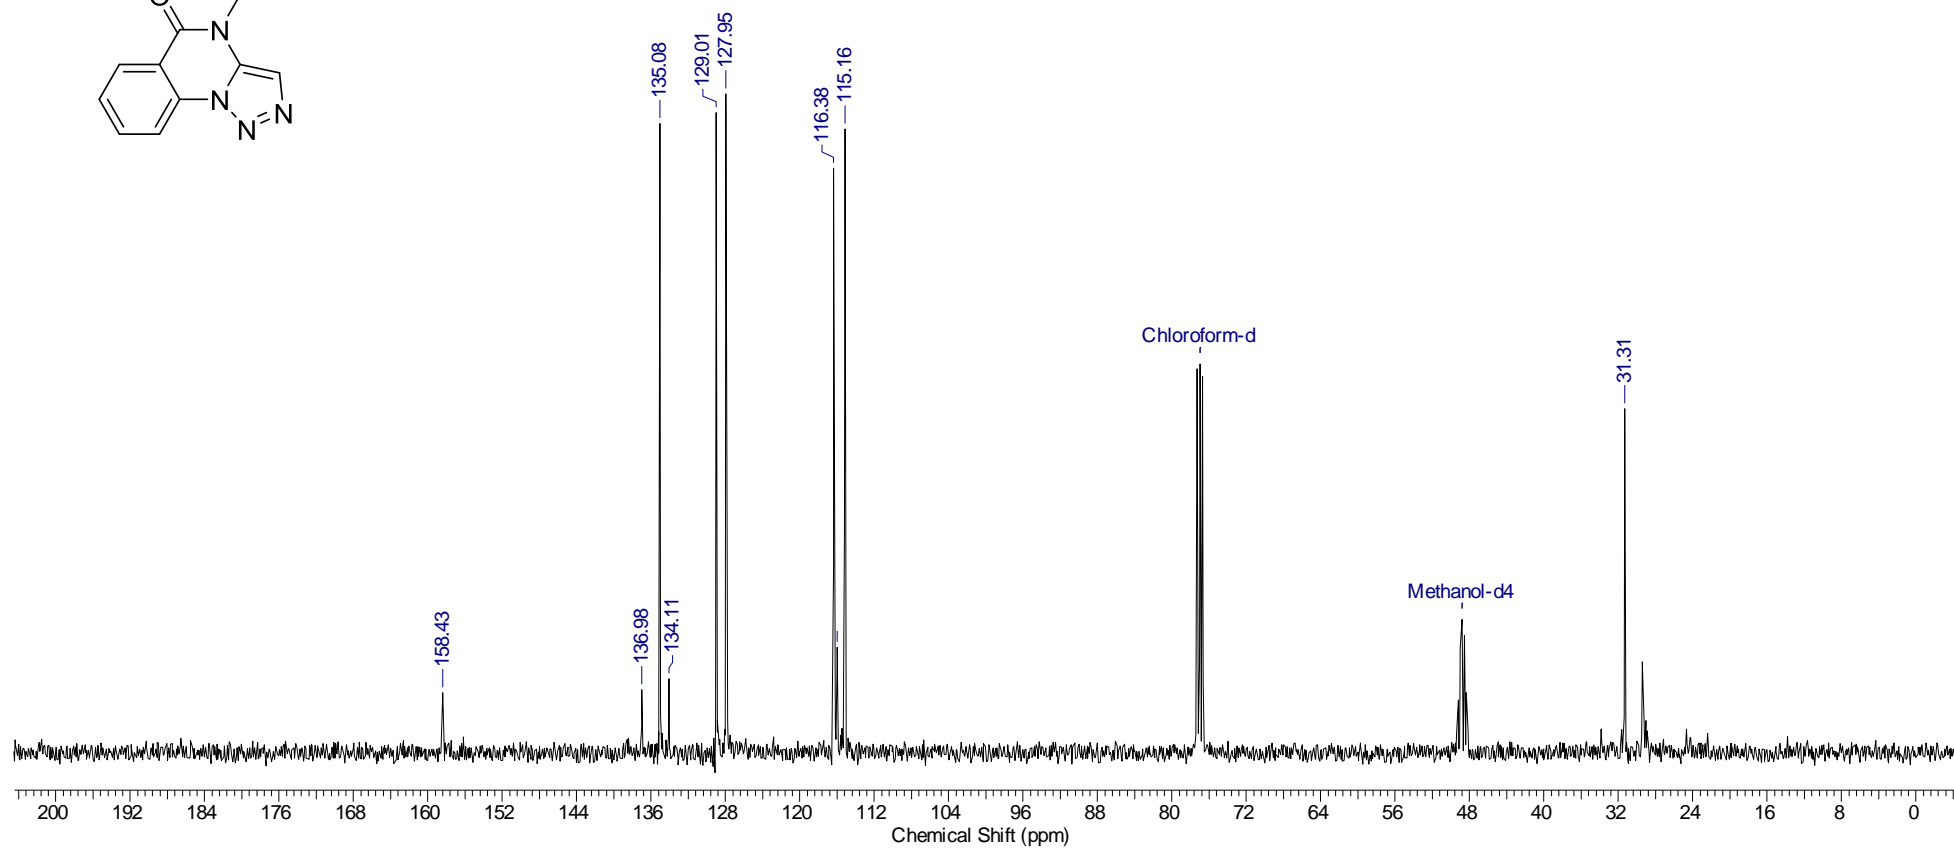

**3-(2-Hydroxyethyl)-4-methyl[1,2,3]triazolo[1,5-a]quinazolin-5(4H)-one (2k)**

<sup>1</sup>H NMR (400 MHz, DMSO-*d*<sub>6</sub>-CDCl<sub>3</sub> = 3:1 + CD<sub>3</sub>OD)

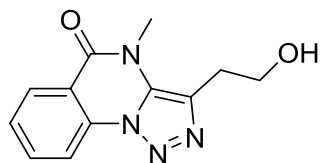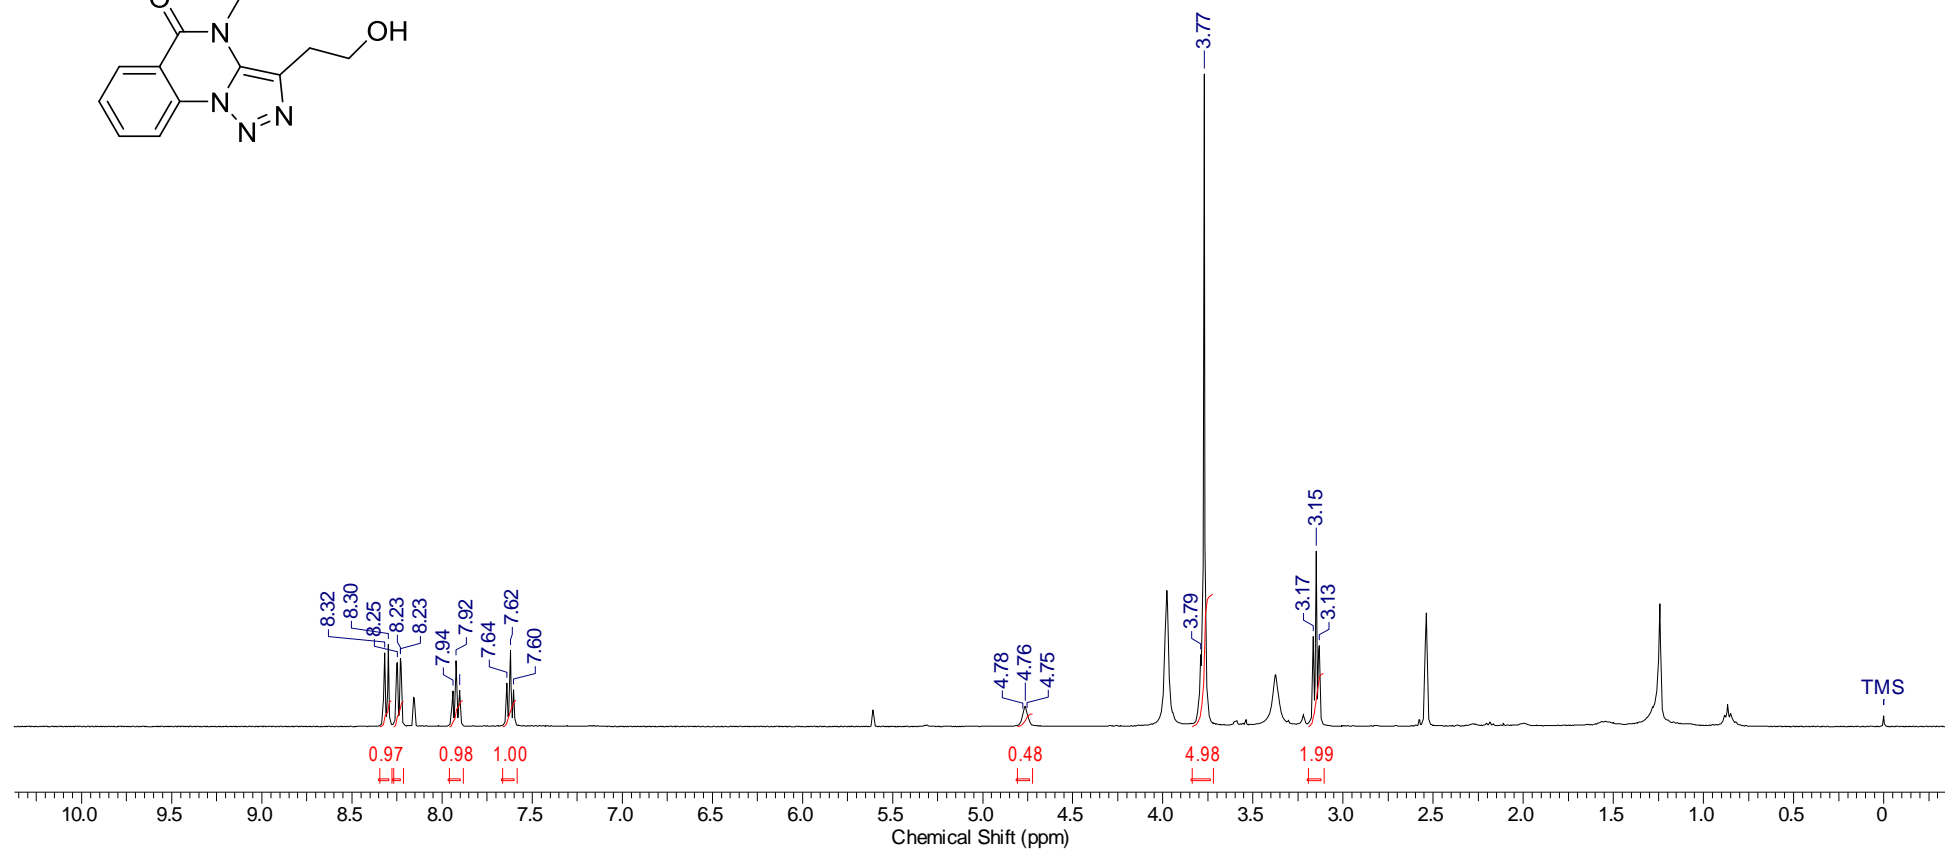

**3-(2-Hydroxyethyl)-4-methyl[1,2,3]triazolo[1,5-a]quinazolin-5(4H)-one (2k)**

$^{13}\text{C}\{^1\text{H}\}$  NMR (100 MHz,  $\text{DMSO-}d_6\text{-CDCl}_3 = 3:1 + \text{CD}_3\text{OD}$ )

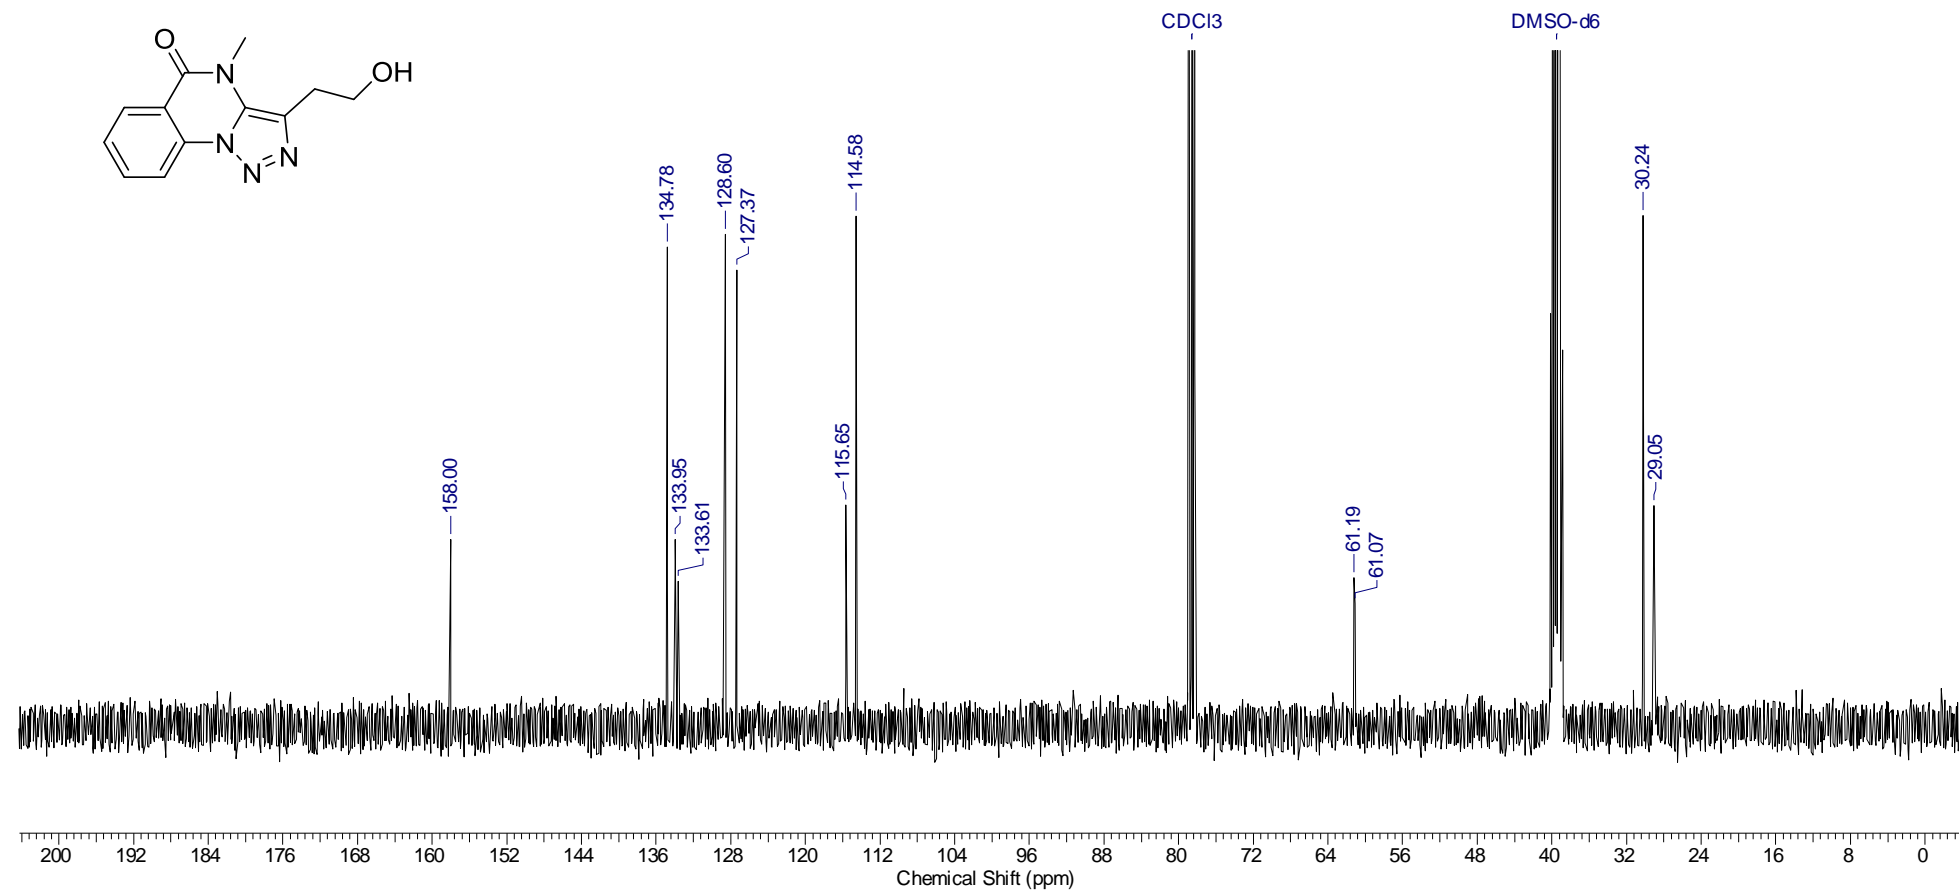

3-(4-*tert*-Butylphenyl)-4-methyl[1,2,3]triazolo[1,5-*a*]quinazolin-5(4*H*)-one (2l)

<sup>1</sup>H NMR (400 MHz, CDCl<sub>3</sub>)

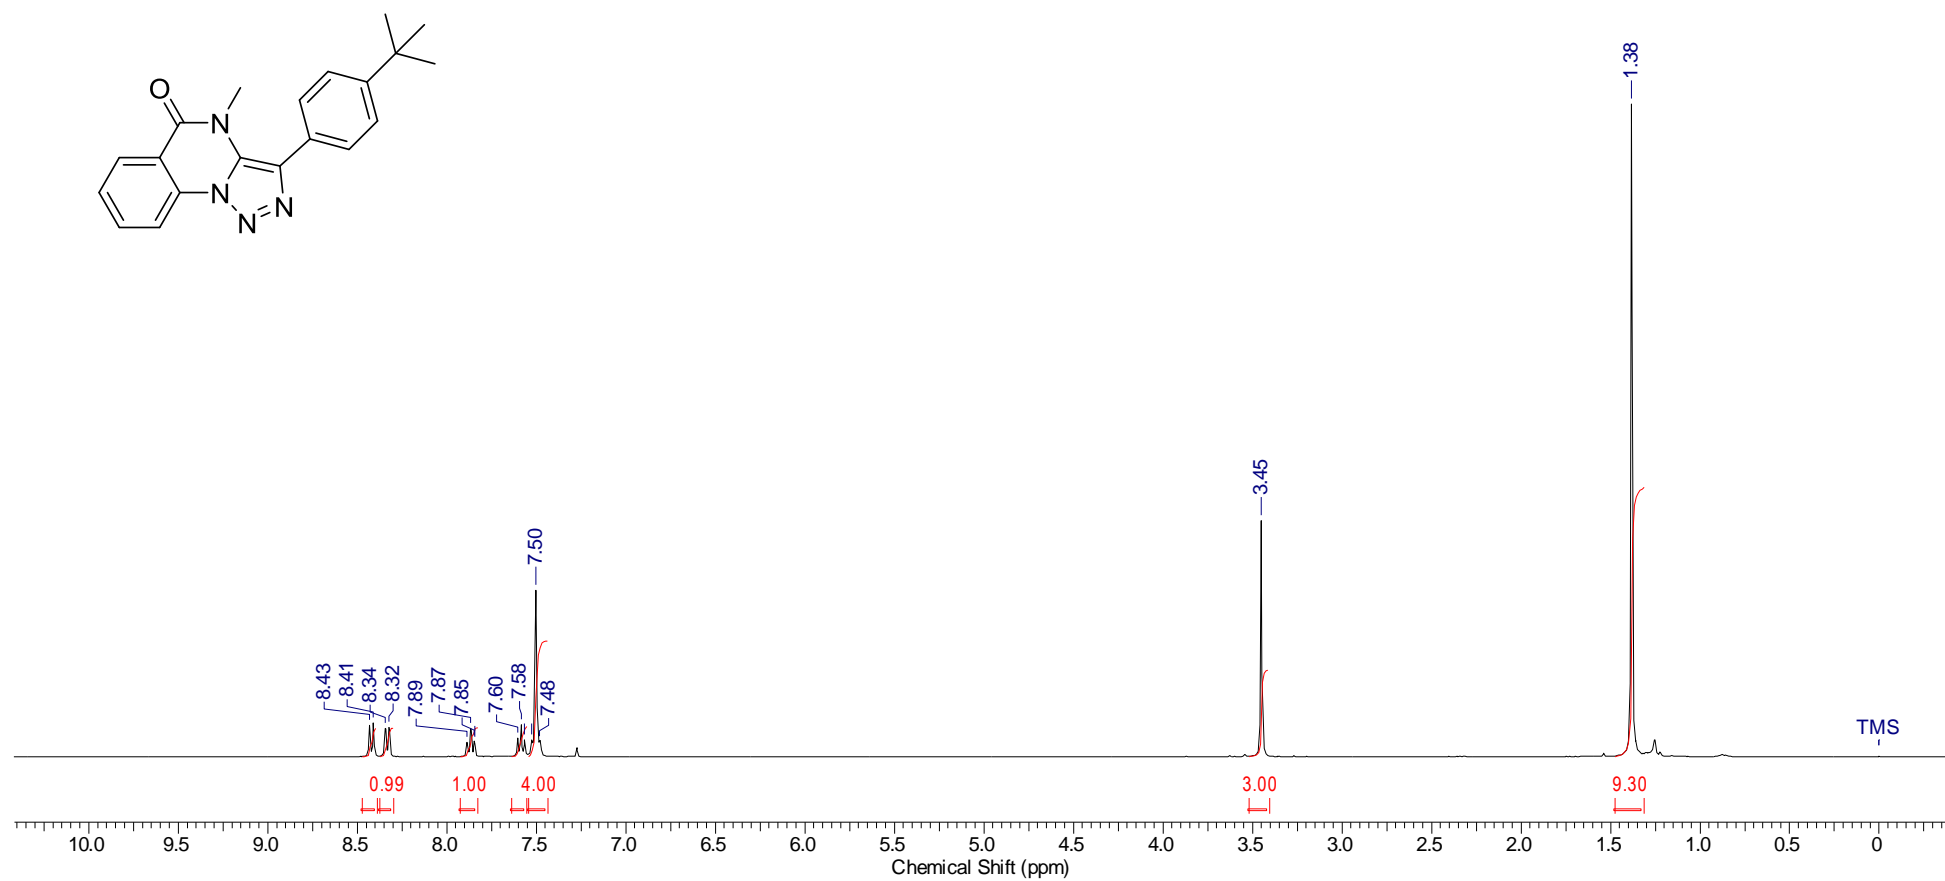

**3-(4-*tert*-Butylphenyl)-4-methyl[1,2,3]triazolo[1,5-*a*]quinazolin-5(4*H*)-one (2l)**

$^{13}\text{C}\{^1\text{H}\}$  NMR (100 MHz,  $\text{CDCl}_3$ )

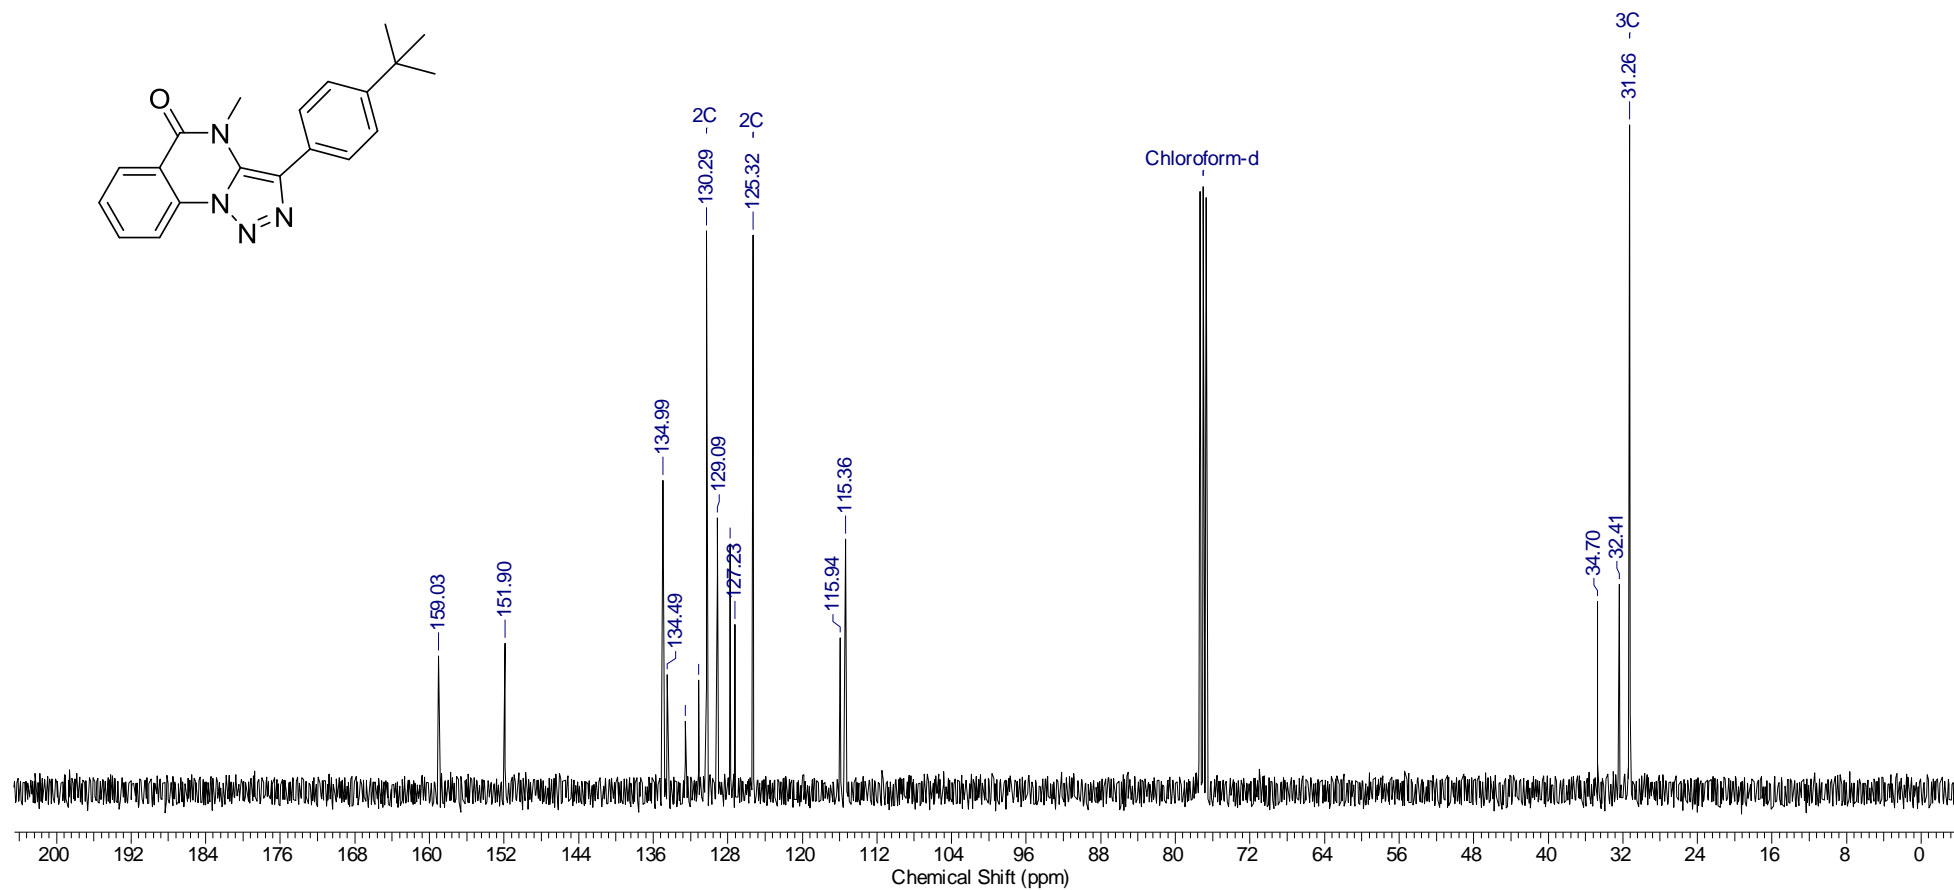

3-(4-Methoxyphenyl)-4-methyl[1,2,3]triazolo[1,5-*a*]quinazolin-5(4*H*)-one (2m)

<sup>1</sup>H NMR (400 MHz, CDCl<sub>3</sub>)

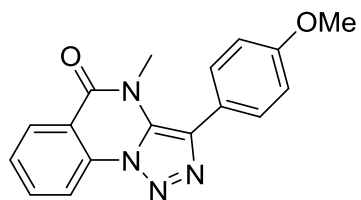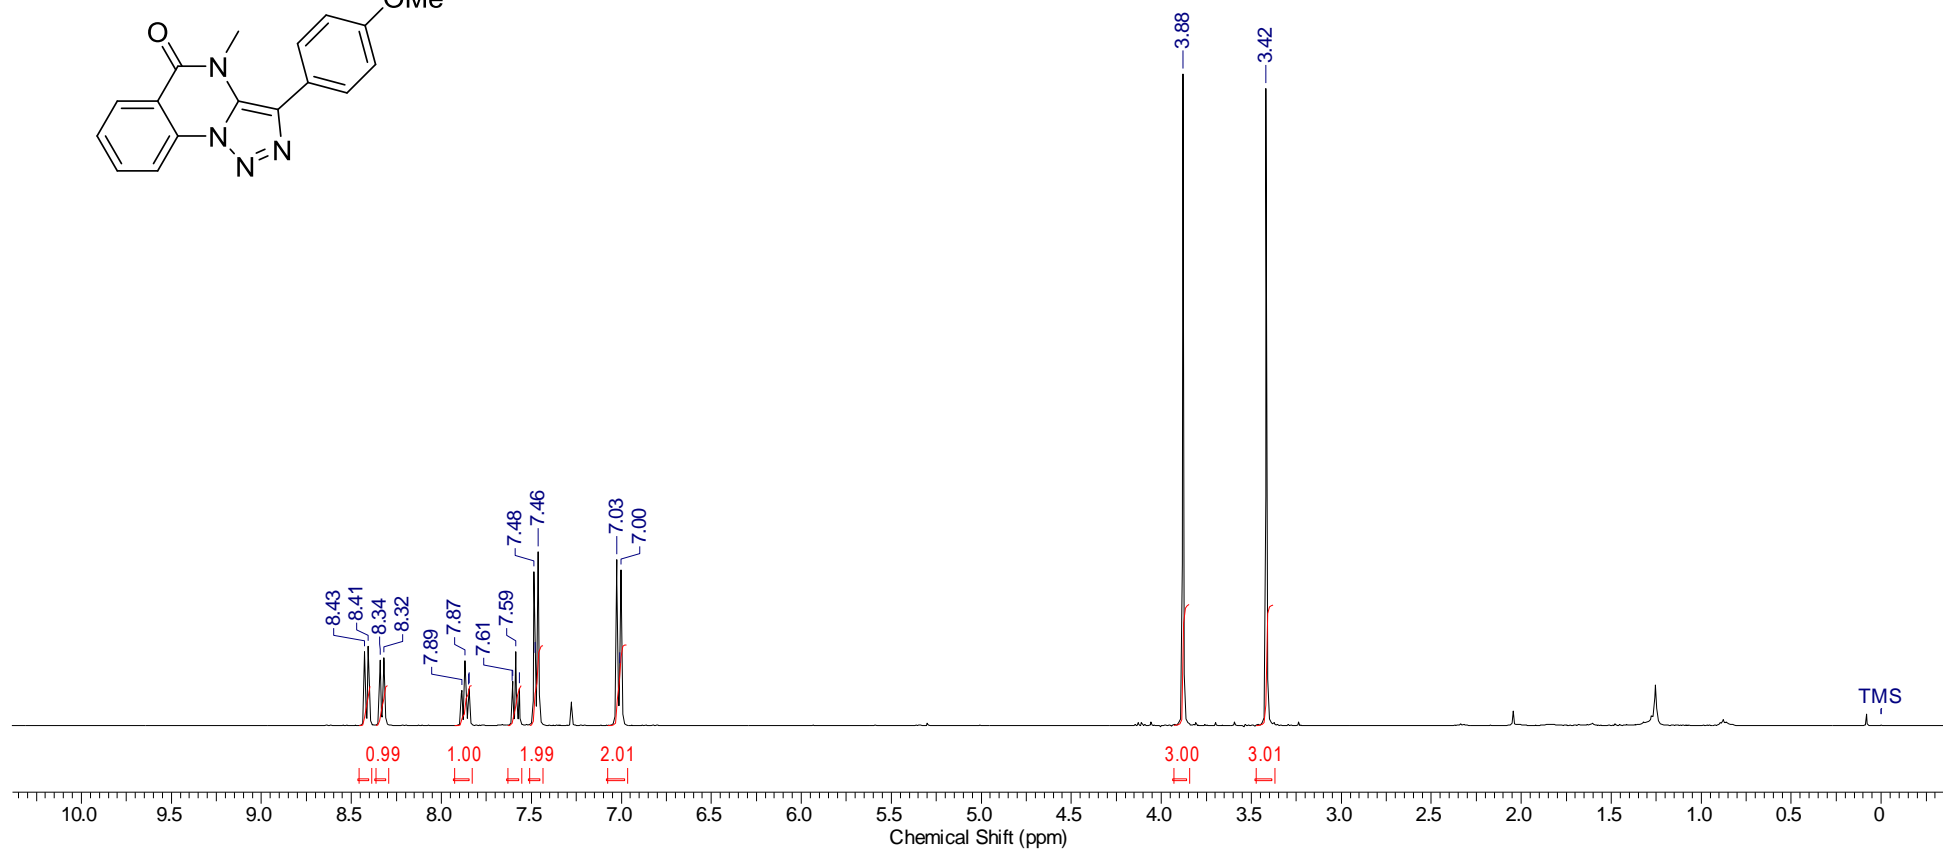

**3-(4-Methoxyphenyl)-4-methyl[1,2,3]triazolo[1,5-*a*]quinazolin-5(4*H*)-one (2m)**

$^{13}\text{C}\{^1\text{H}\}$  NMR (100 MHz,  $\text{CDCl}_3$ )

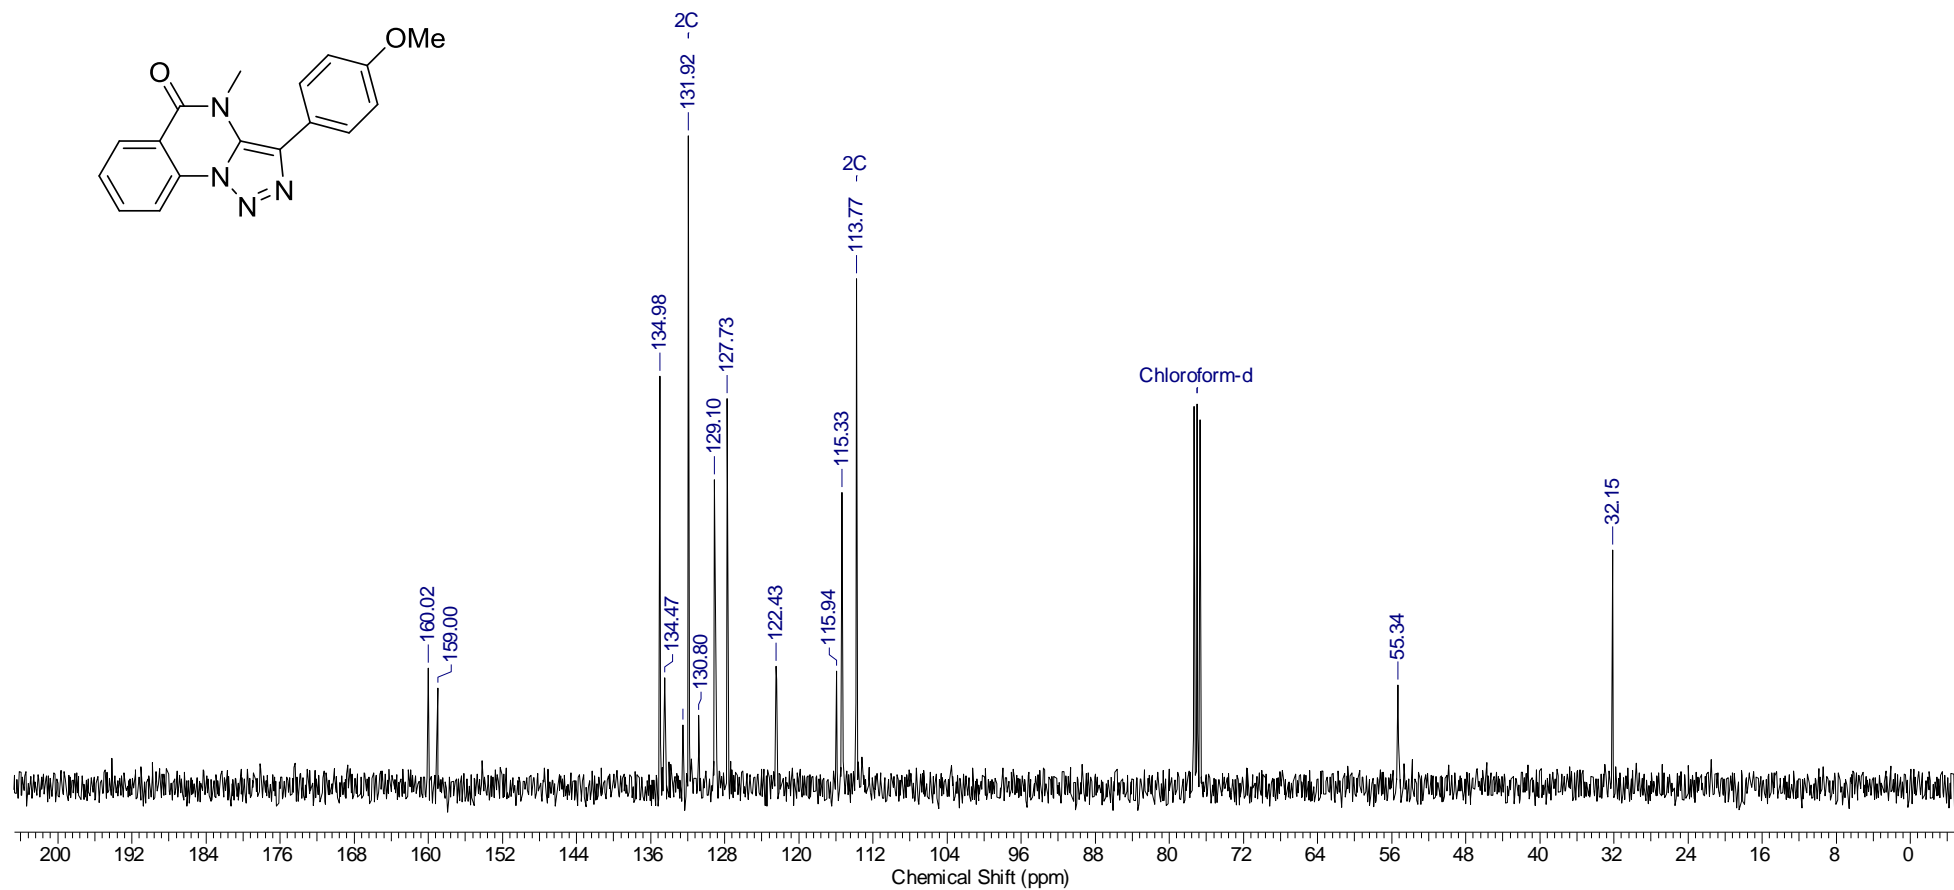

Methyl 3-(4-methyl-5-oxo-4,5-dihydro[1,2,3]triazolo[1,5-a]quinazolin-3-yl)benzoate (2n)

<sup>1</sup>H NMR (400 MHz, CDCl<sub>3</sub>)

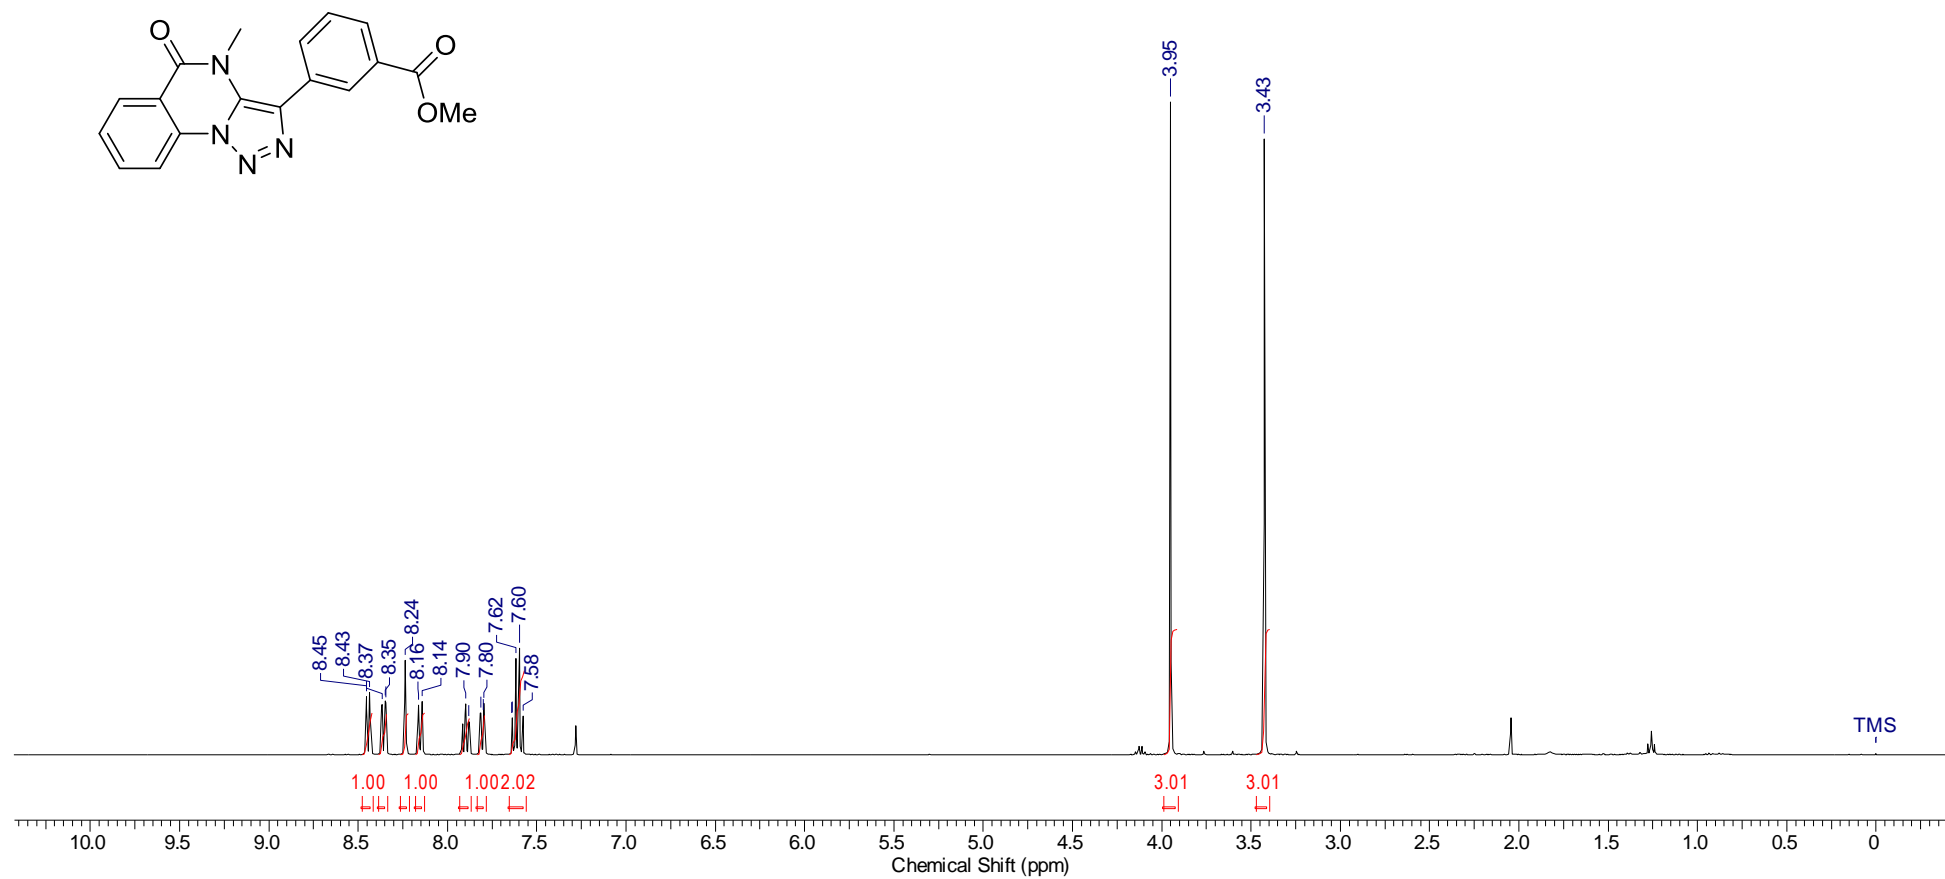



Methyl 3-(4-methyl-5-oxo-4,5-dihydro[1,2,3]triazolo[1,5-a]quinazolin-3-yl)benzoate (2n)

$^{13}\text{C}\{^1\text{H}\}$  NMR (100 MHz,  $\text{CDCl}_3$ )

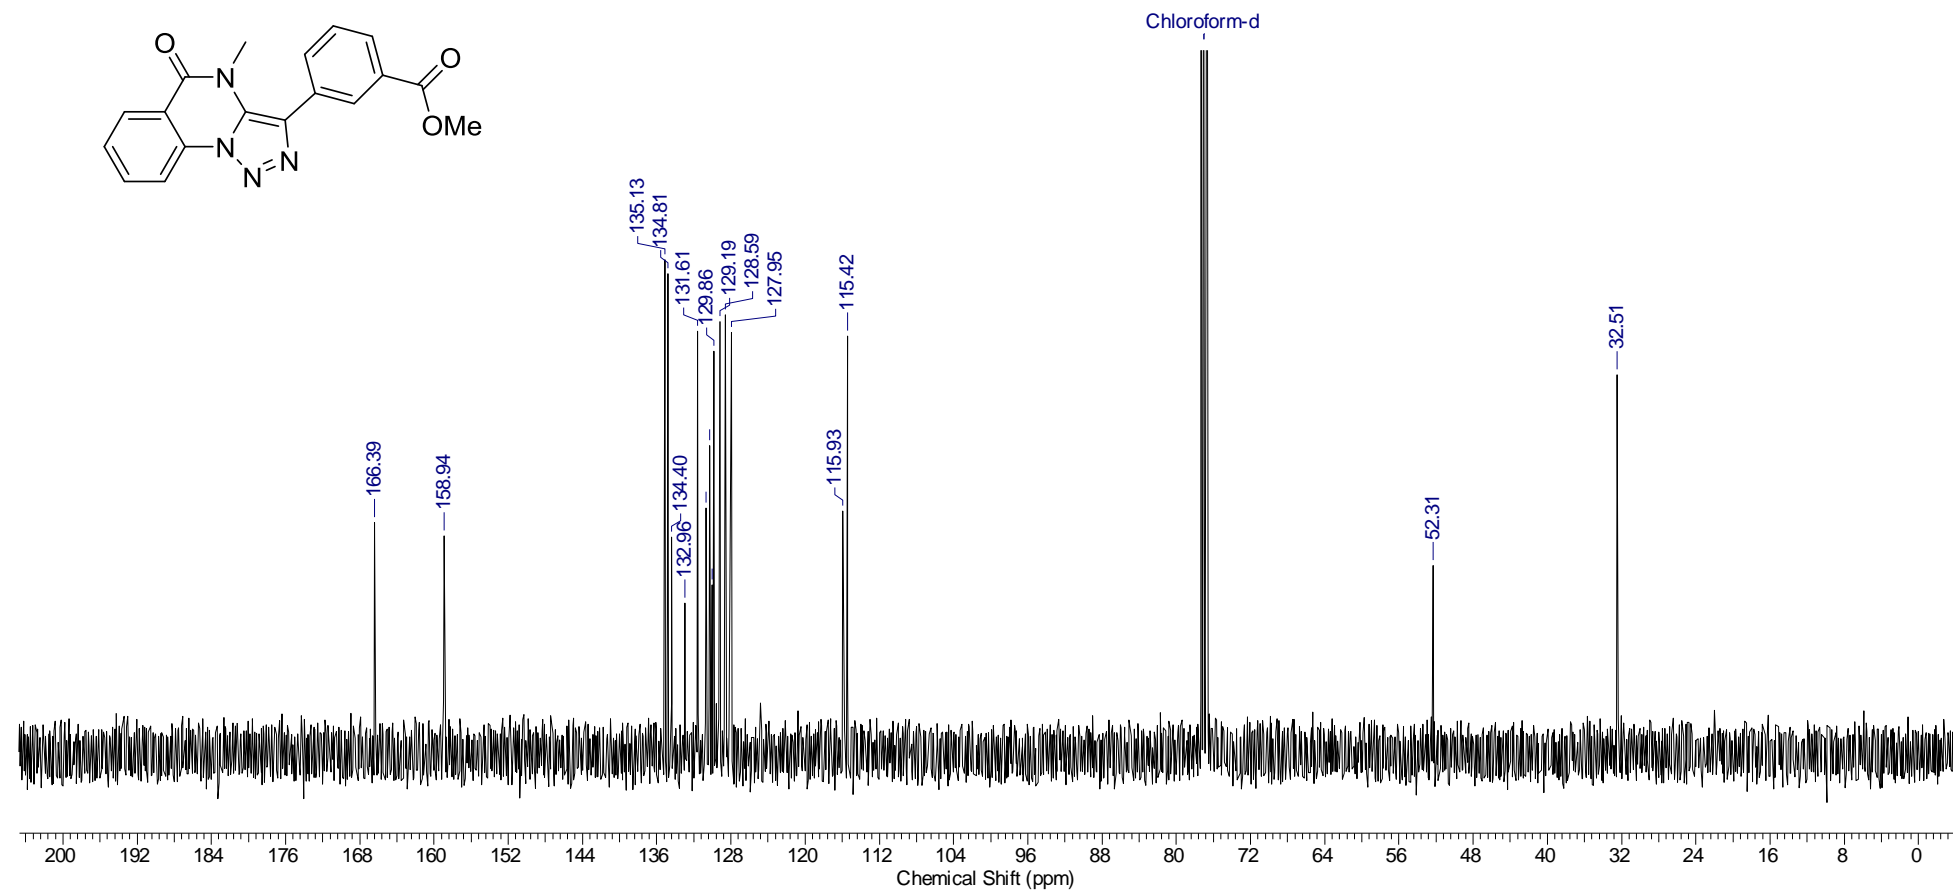

3-(4-Acetylphenyl)-4-methyl[1,2,3]triazolo[1,5-a]quinazolin-5(4H)-one (2o)

<sup>1</sup>H NMR (400 MHz, CDCl<sub>3</sub>-CD<sub>3</sub>OD)

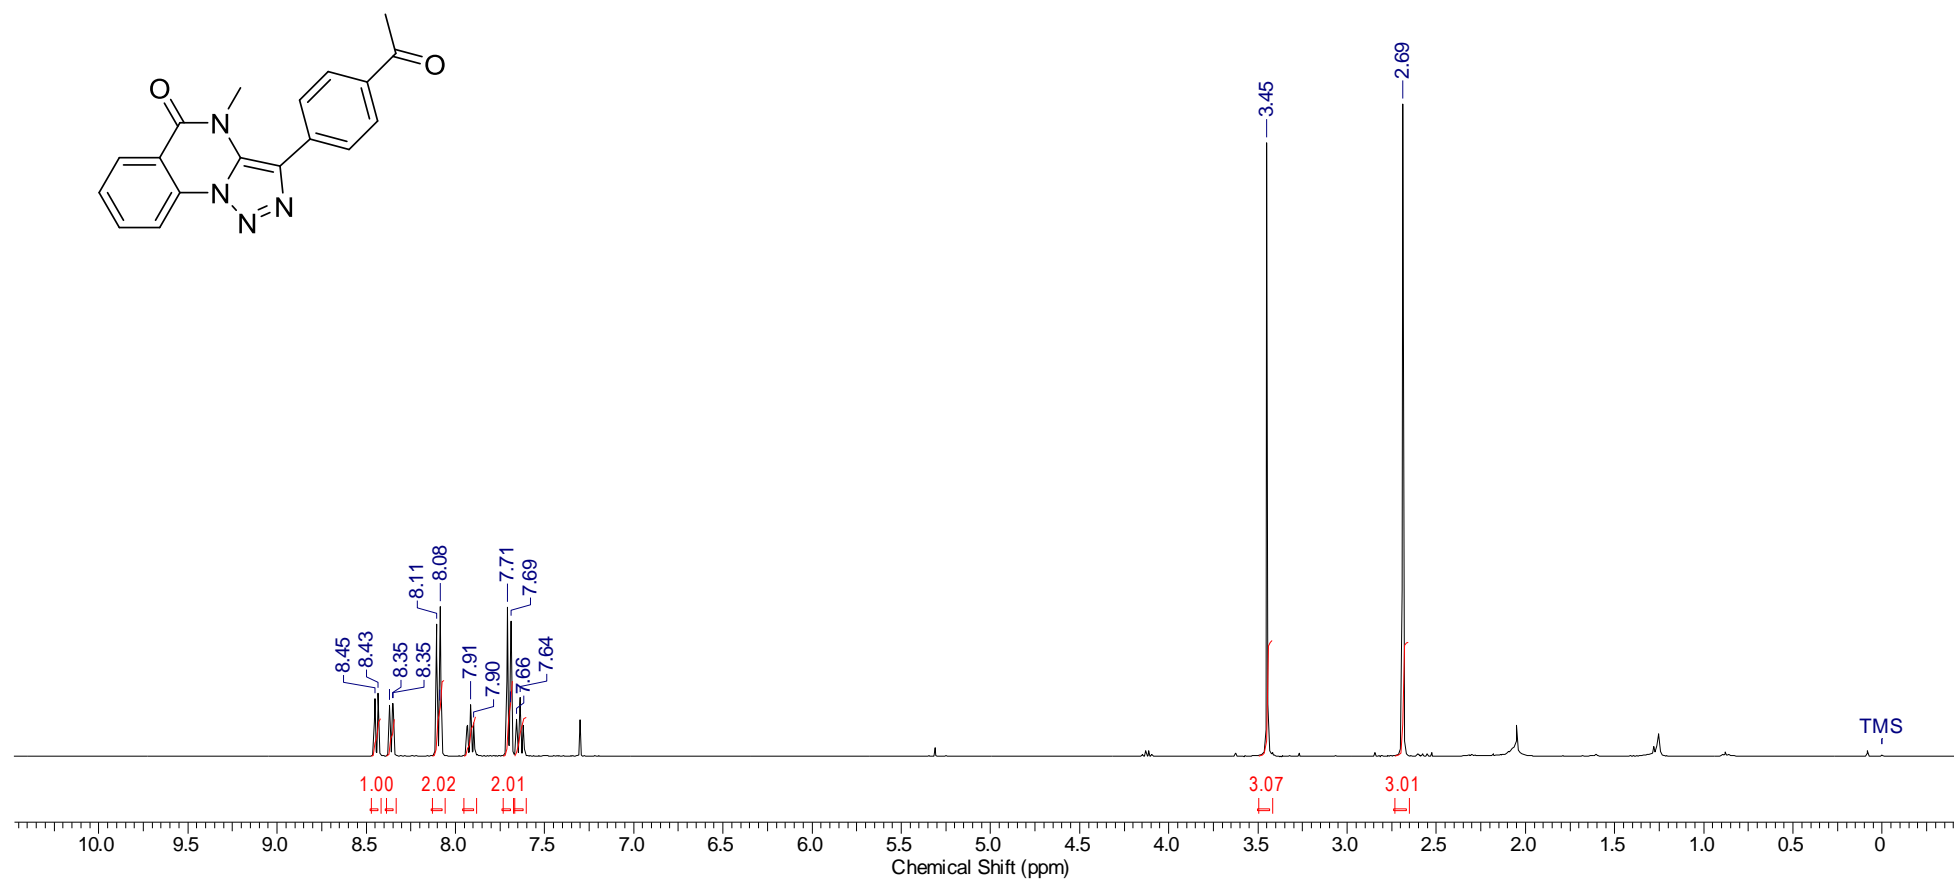

3-(4-Acetylphenyl)-4-methyl[1,2,3]triazolo[1,5-a]quinazolin-5(4H)-one (2o)

$^{13}\text{C}\{^1\text{H}\}$  NMR (100 MHz,  $\text{CDCl}_3\text{-CD}_3\text{OD}$ )

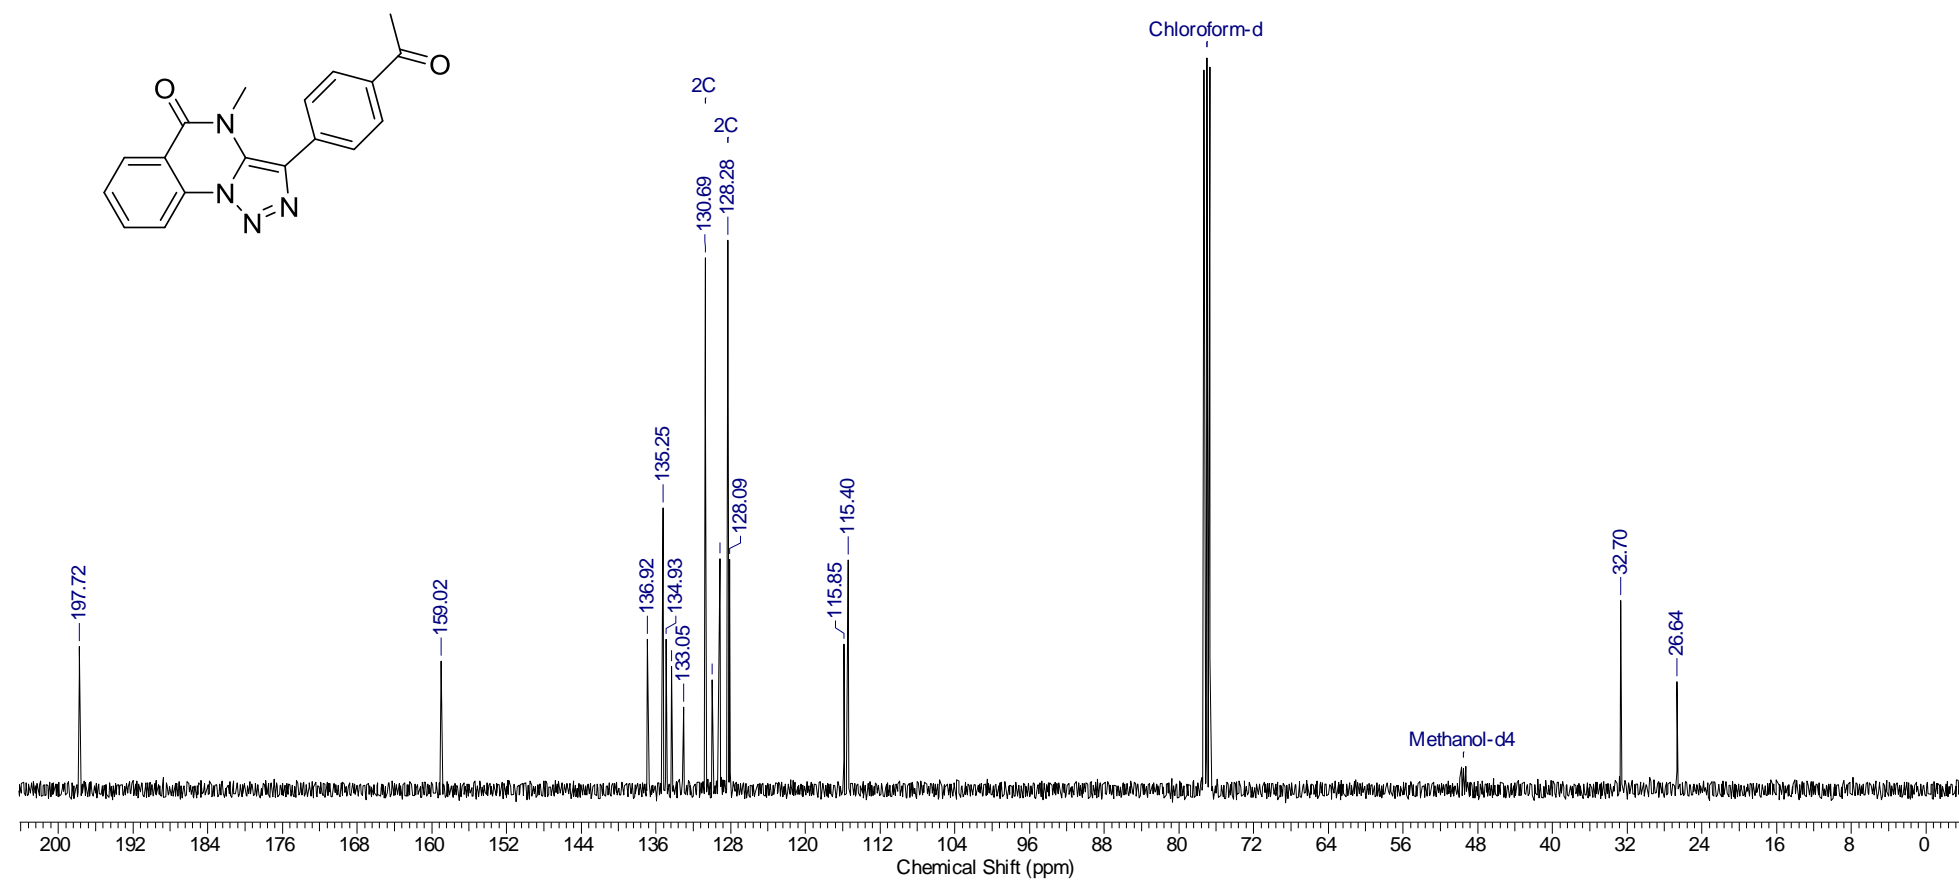

3-Butyl[1,2,3]triazolo[1,5-a]quinazolin-5(4H)-one (2p)

<sup>1</sup>H NMR (400 MHz, CDCl<sub>3</sub>-CD<sub>3</sub>OD)

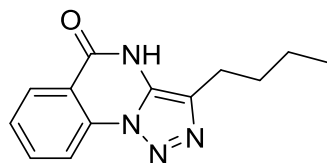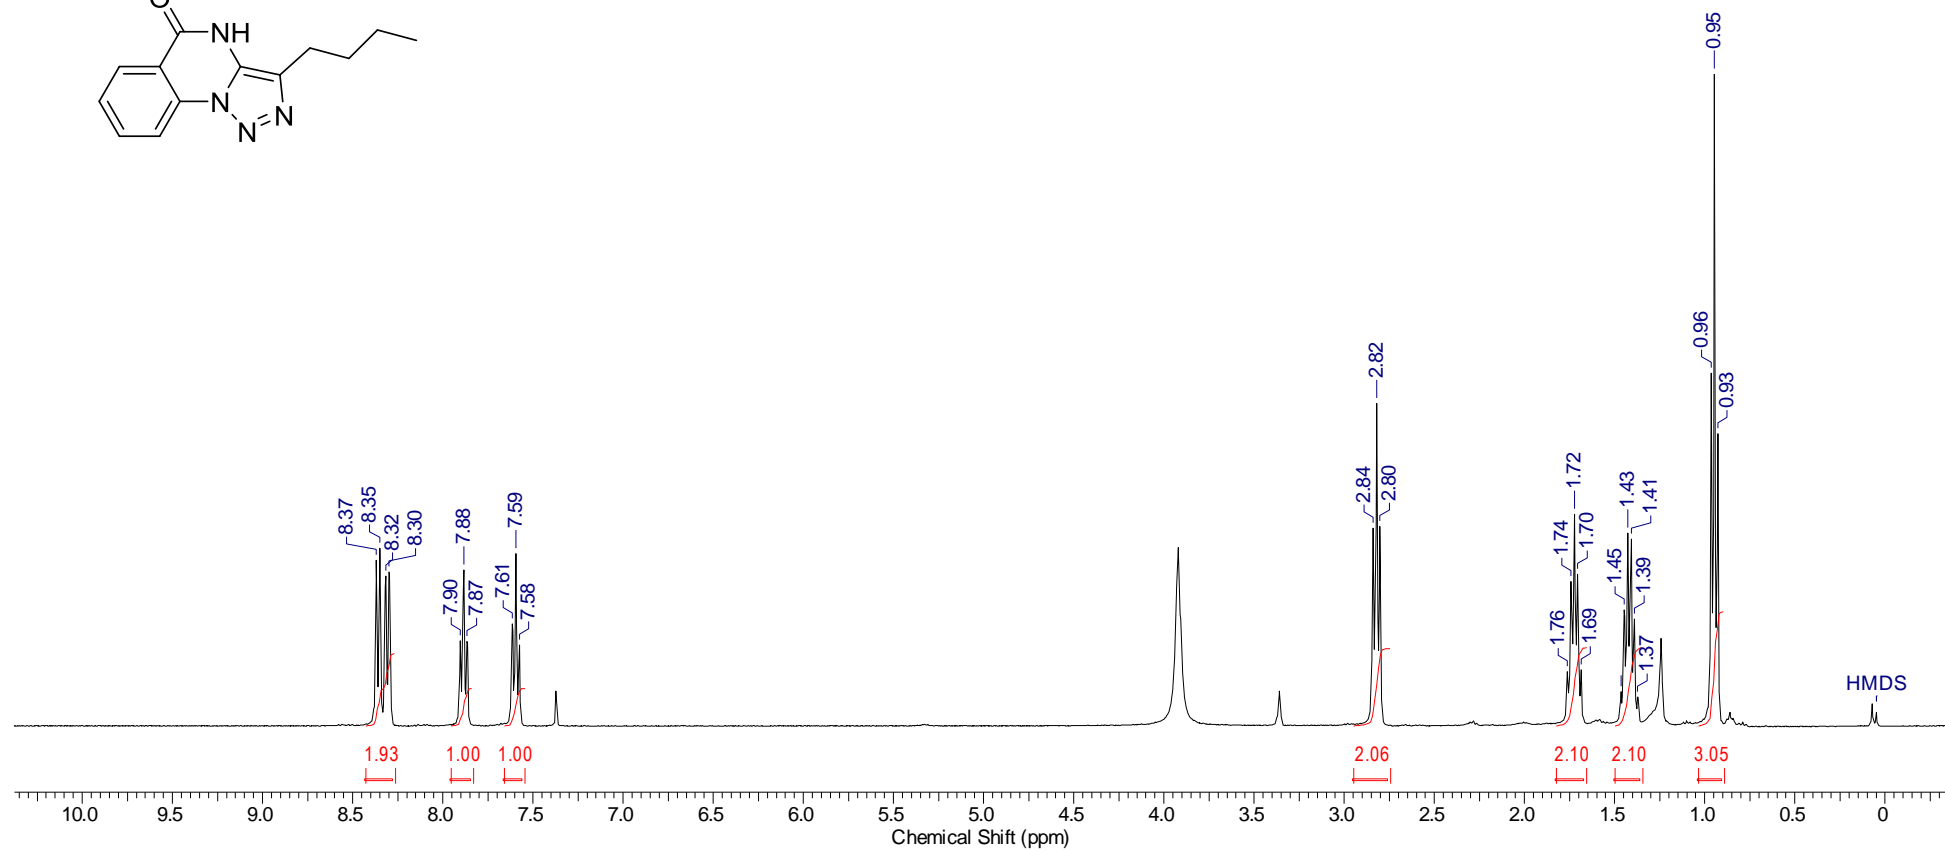

**3-Butyl[1,2,3]triazolo[1,5-a]quinazolin-5(4H)-one (2p)**

$^{13}\text{C}\{^1\text{H}\}$  NMR (100 MHz,  $\text{CDCl}_3\text{-CD}_3\text{OD}$ )

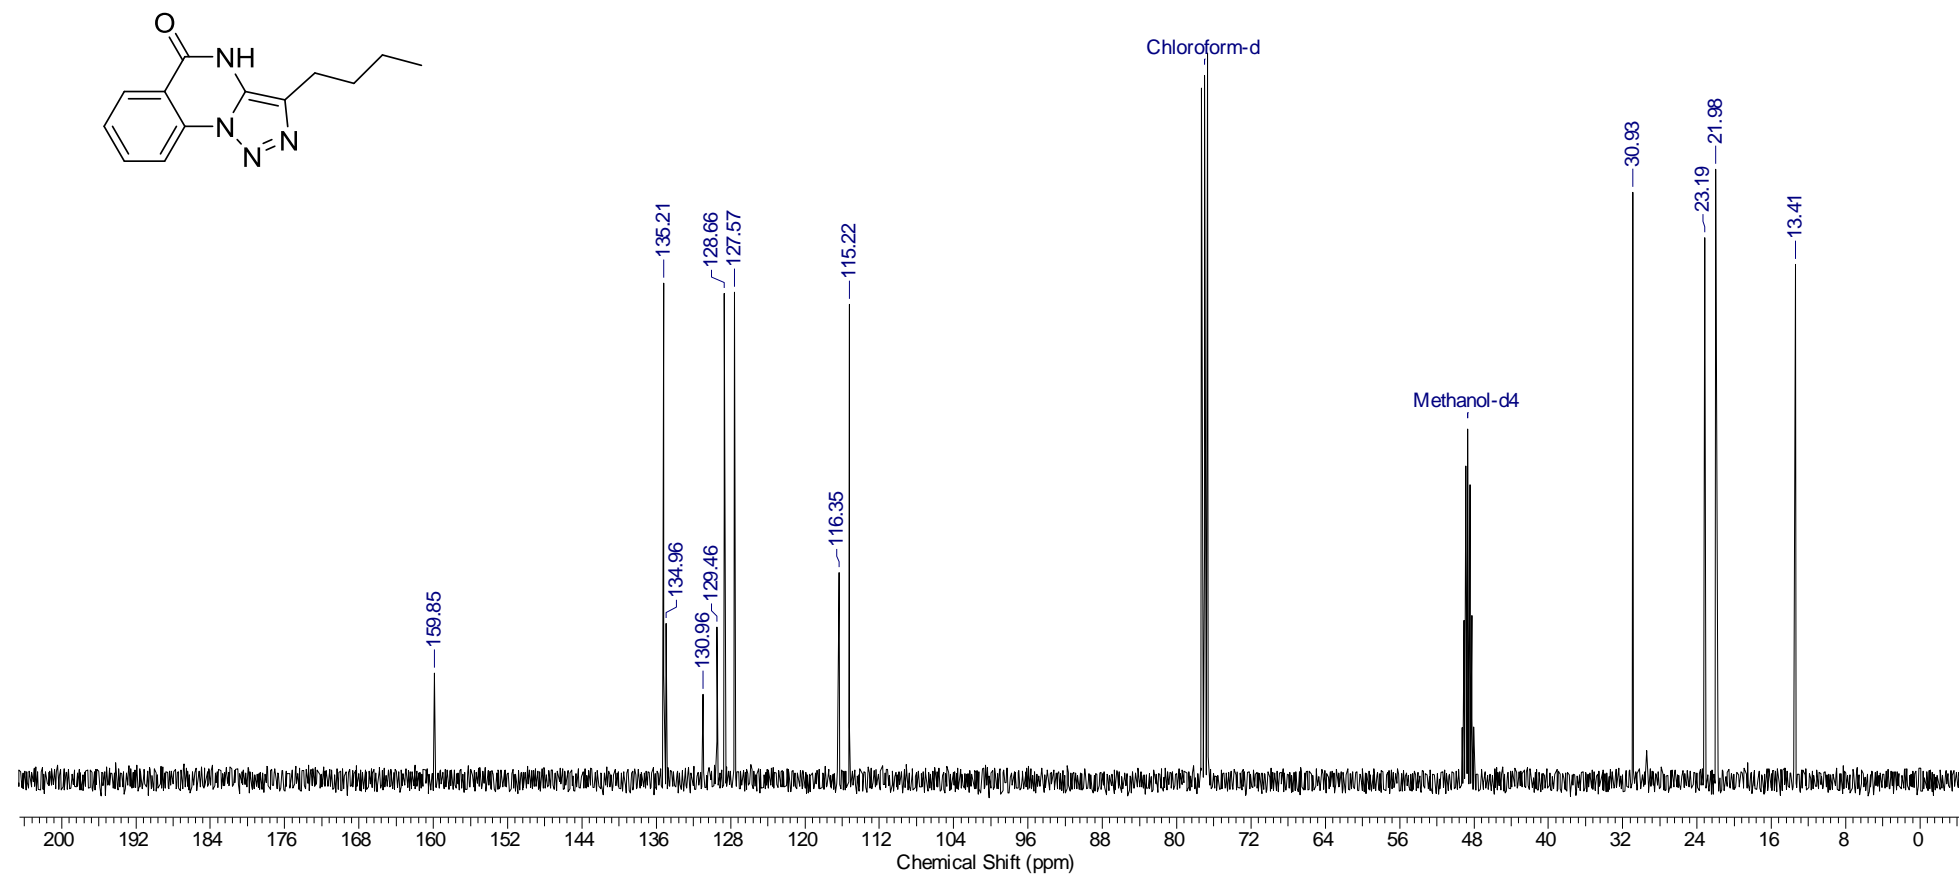

3-Butyl-4-(4-methylphenyl)[1,2,3]triazolo[1,5-a]quinazolin-5(4H)-one (2q)

<sup>1</sup>H NMR (400 MHz, CDCl<sub>3</sub>)

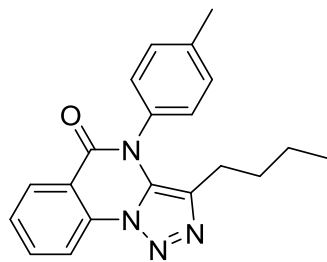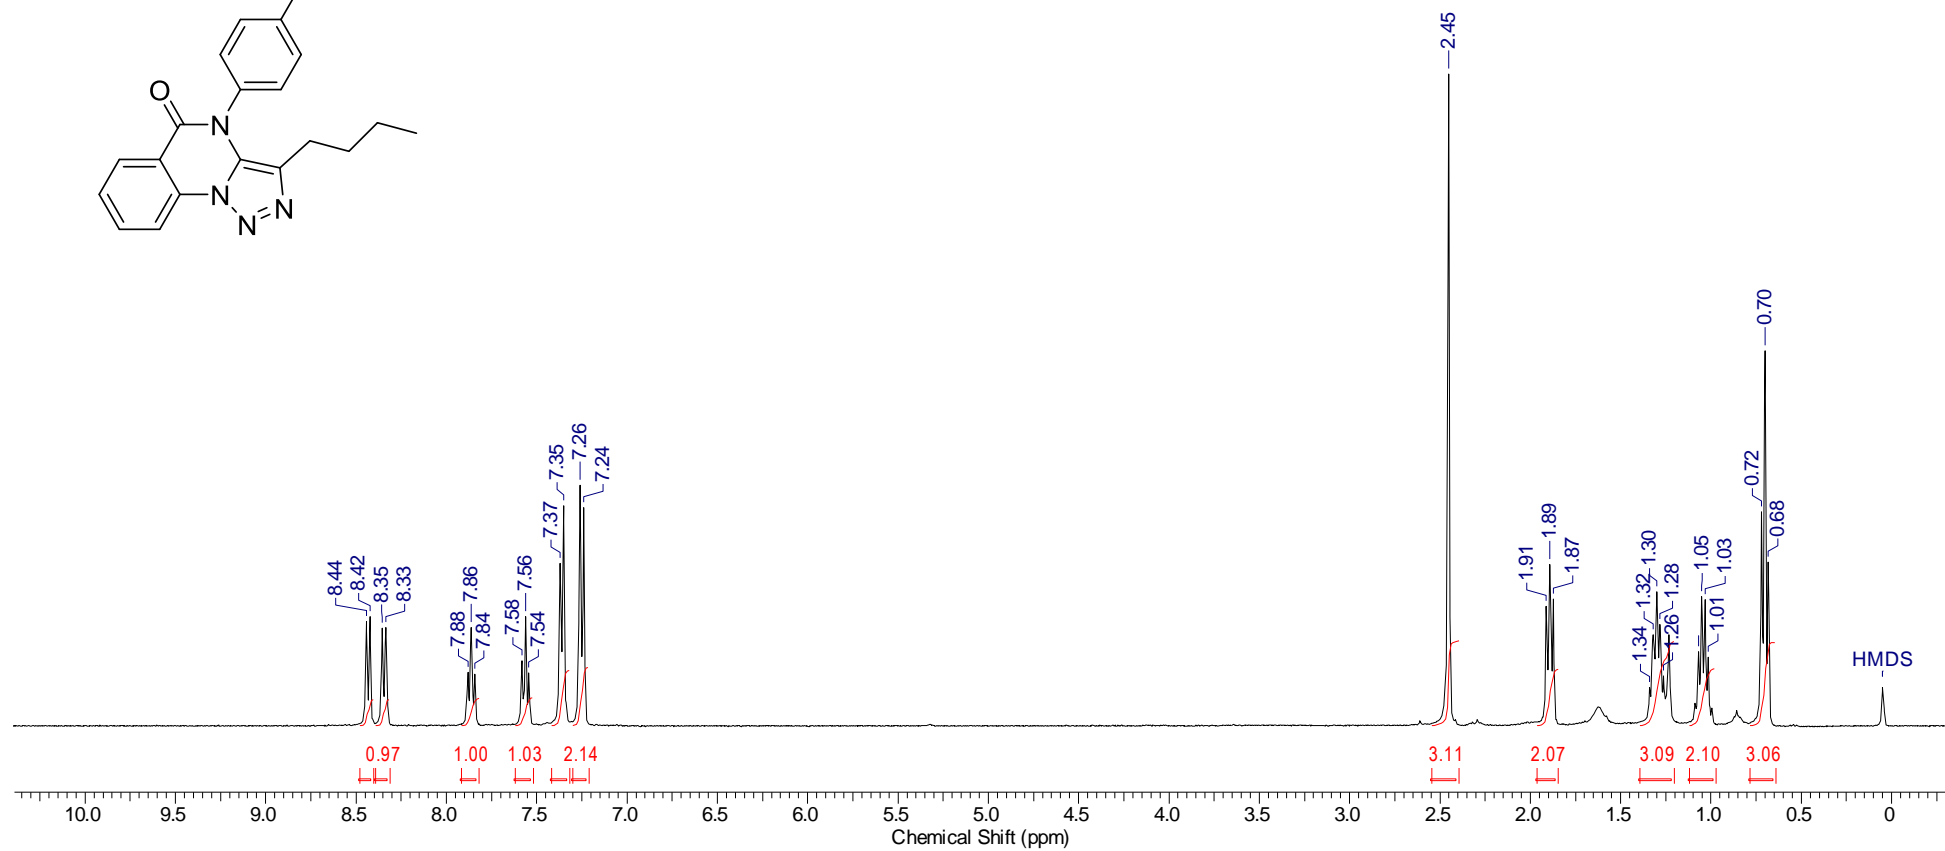

**3-Butyl-4-(4-methylphenyl)[1,2,3]triazolo[1,5-a]quinazolin-5(4H)-one (2q)**

$^{13}\text{C}\{^1\text{H}\}$  NMR (100 MHz,  $\text{CDCl}_3$ )

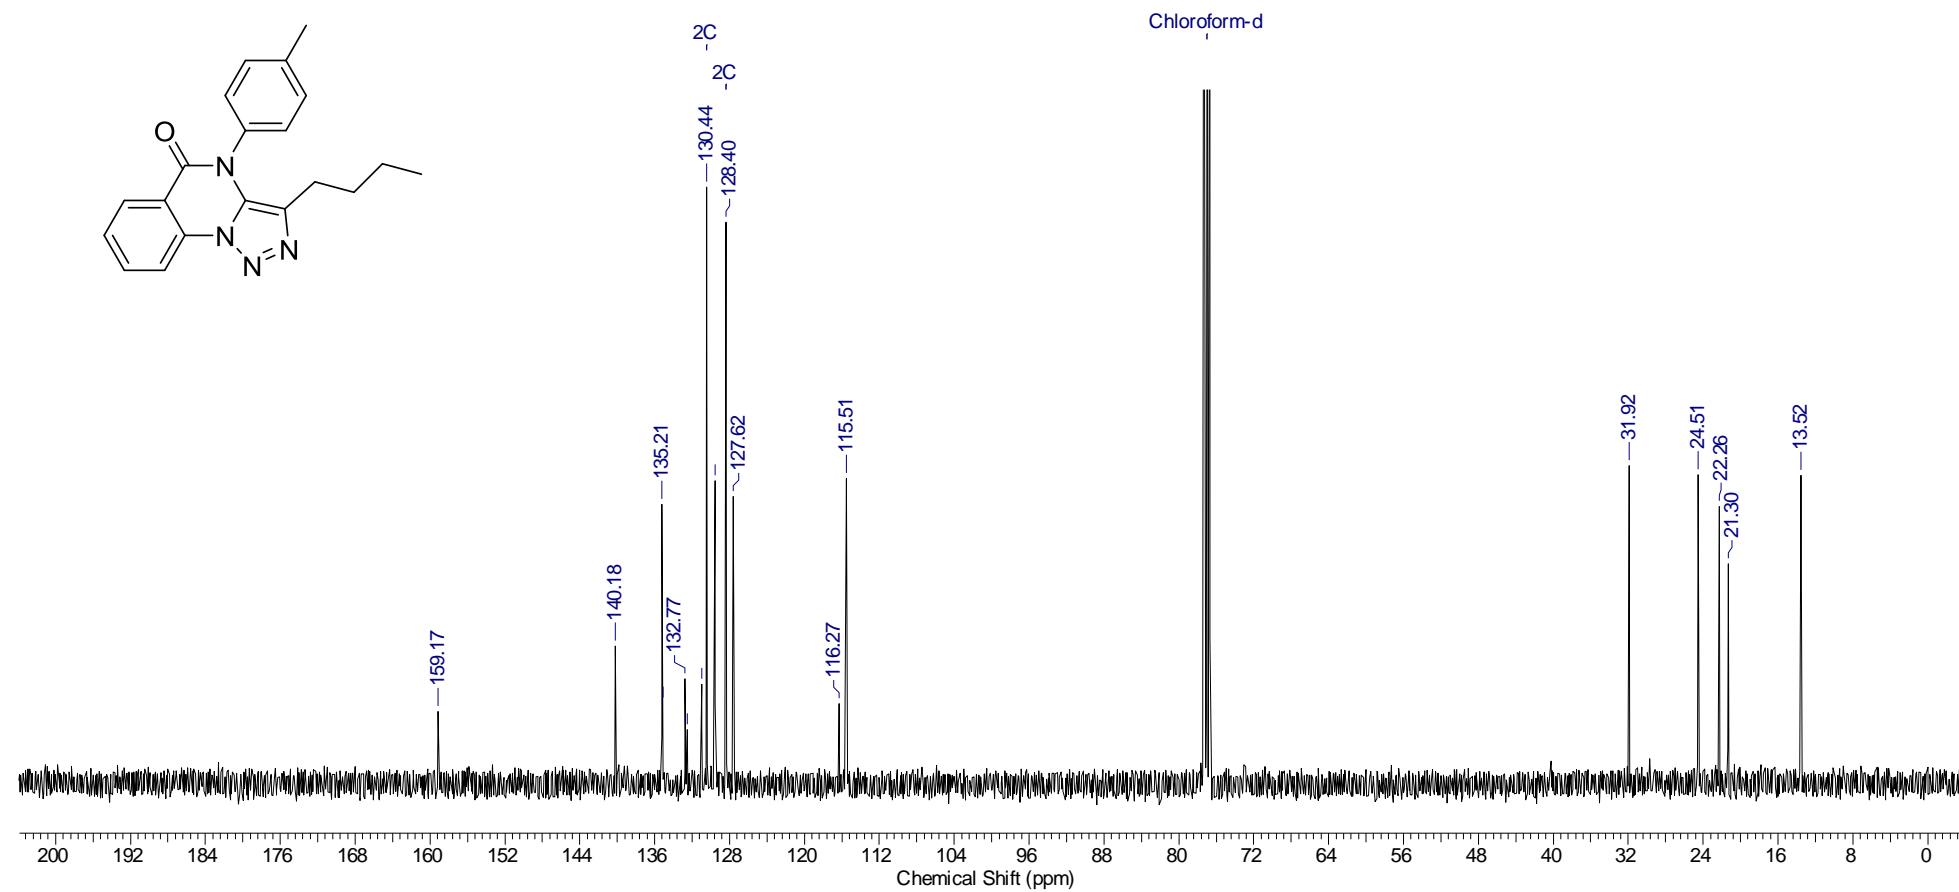

**3-Butyl-4-(4-methoxyphenyl)[1,2,3]triazolo[1,5-a]quinazolin-5(4H)-one (2r)**

<sup>1</sup>H NMR (400 MHz, CDCl<sub>3</sub>)

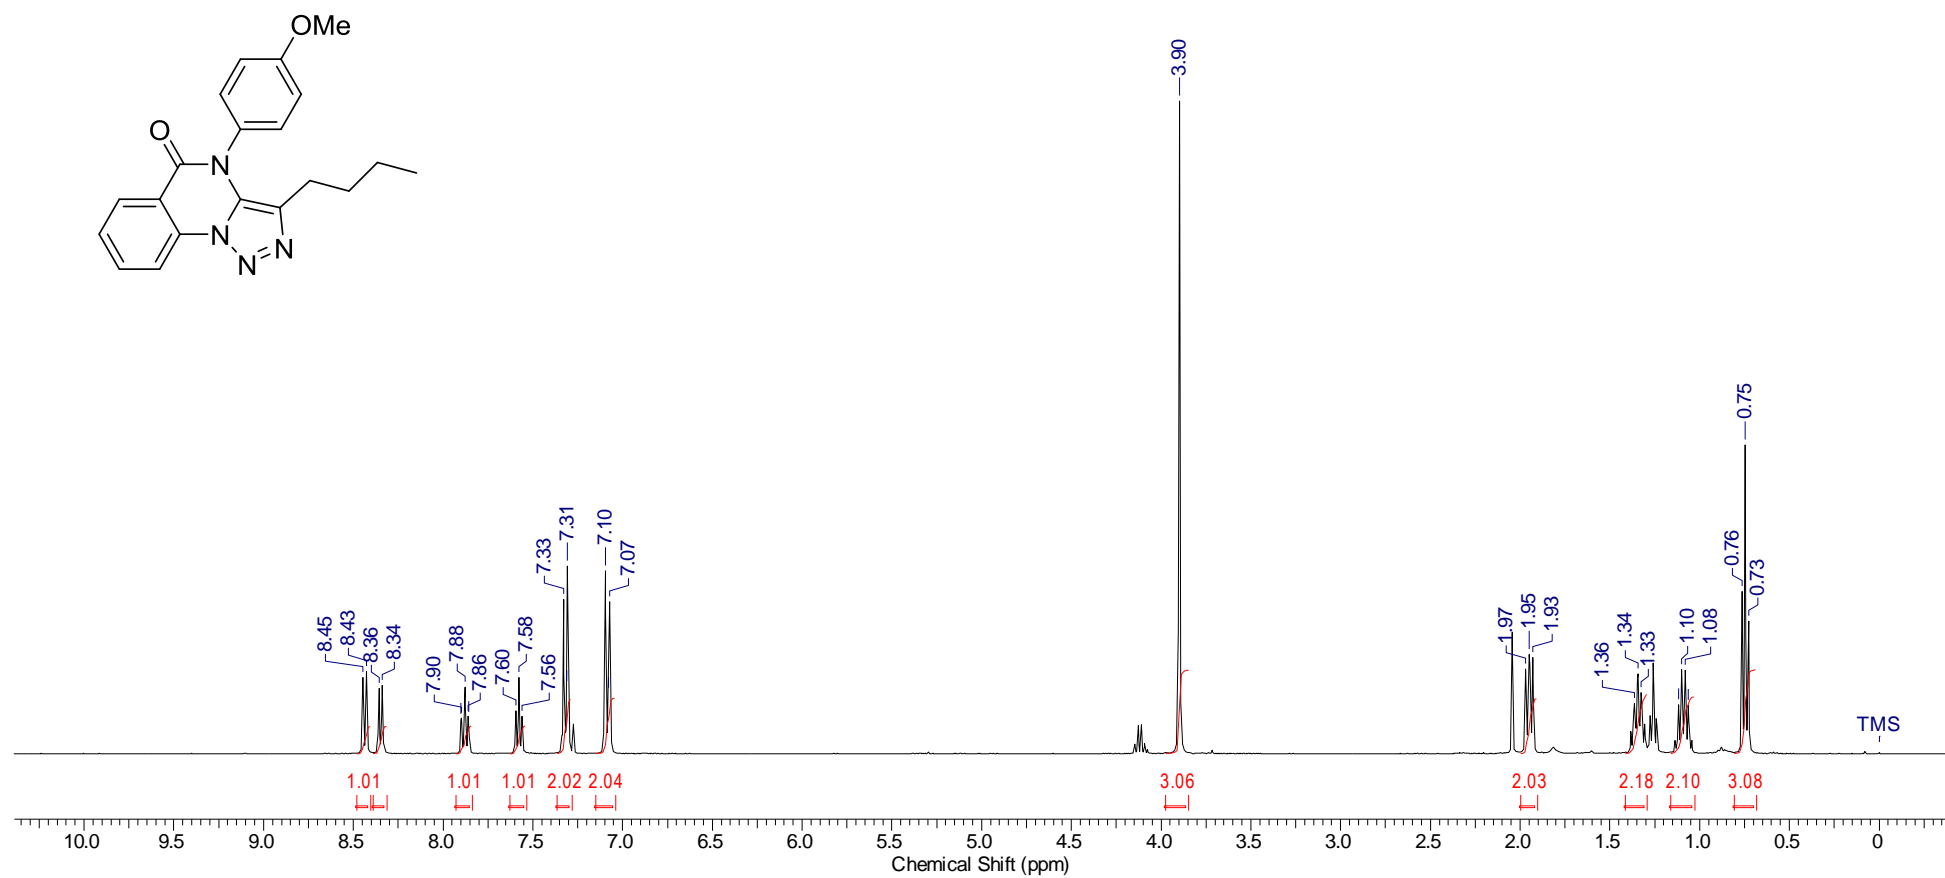



**3-Butyl-4-(4-methoxyphenyl)[1,2,3]triazolo[1,5-a]quinazolin-5(4H)-one (2r)**

$^{13}\text{C}\{^1\text{H}\}$  NMR (100 MHz,  $\text{CDCl}_3$ )

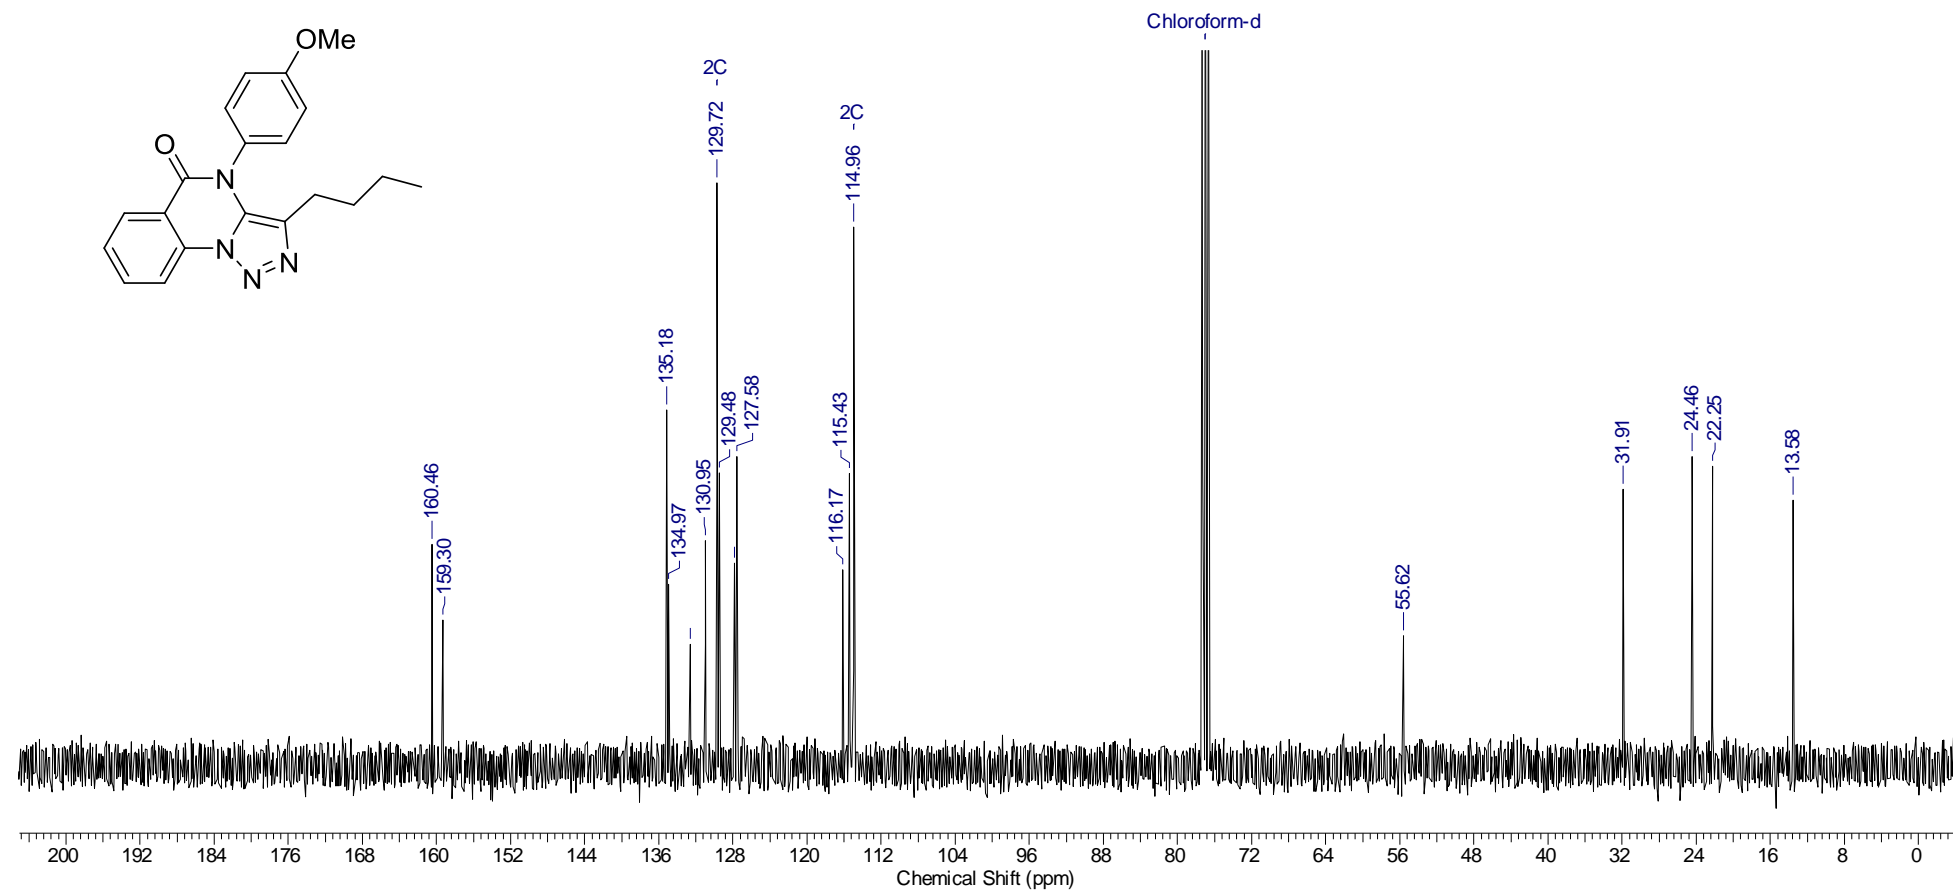

**3-Butyl-4-cyclopropyl[1,2,3]triazolo[1,5-a]quinazolin-5(4H)-one (2s)**

<sup>1</sup>H NMR (600 MHz, CDCl<sub>3</sub>)

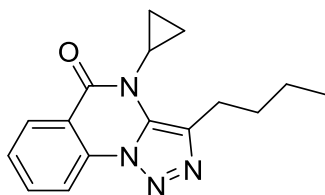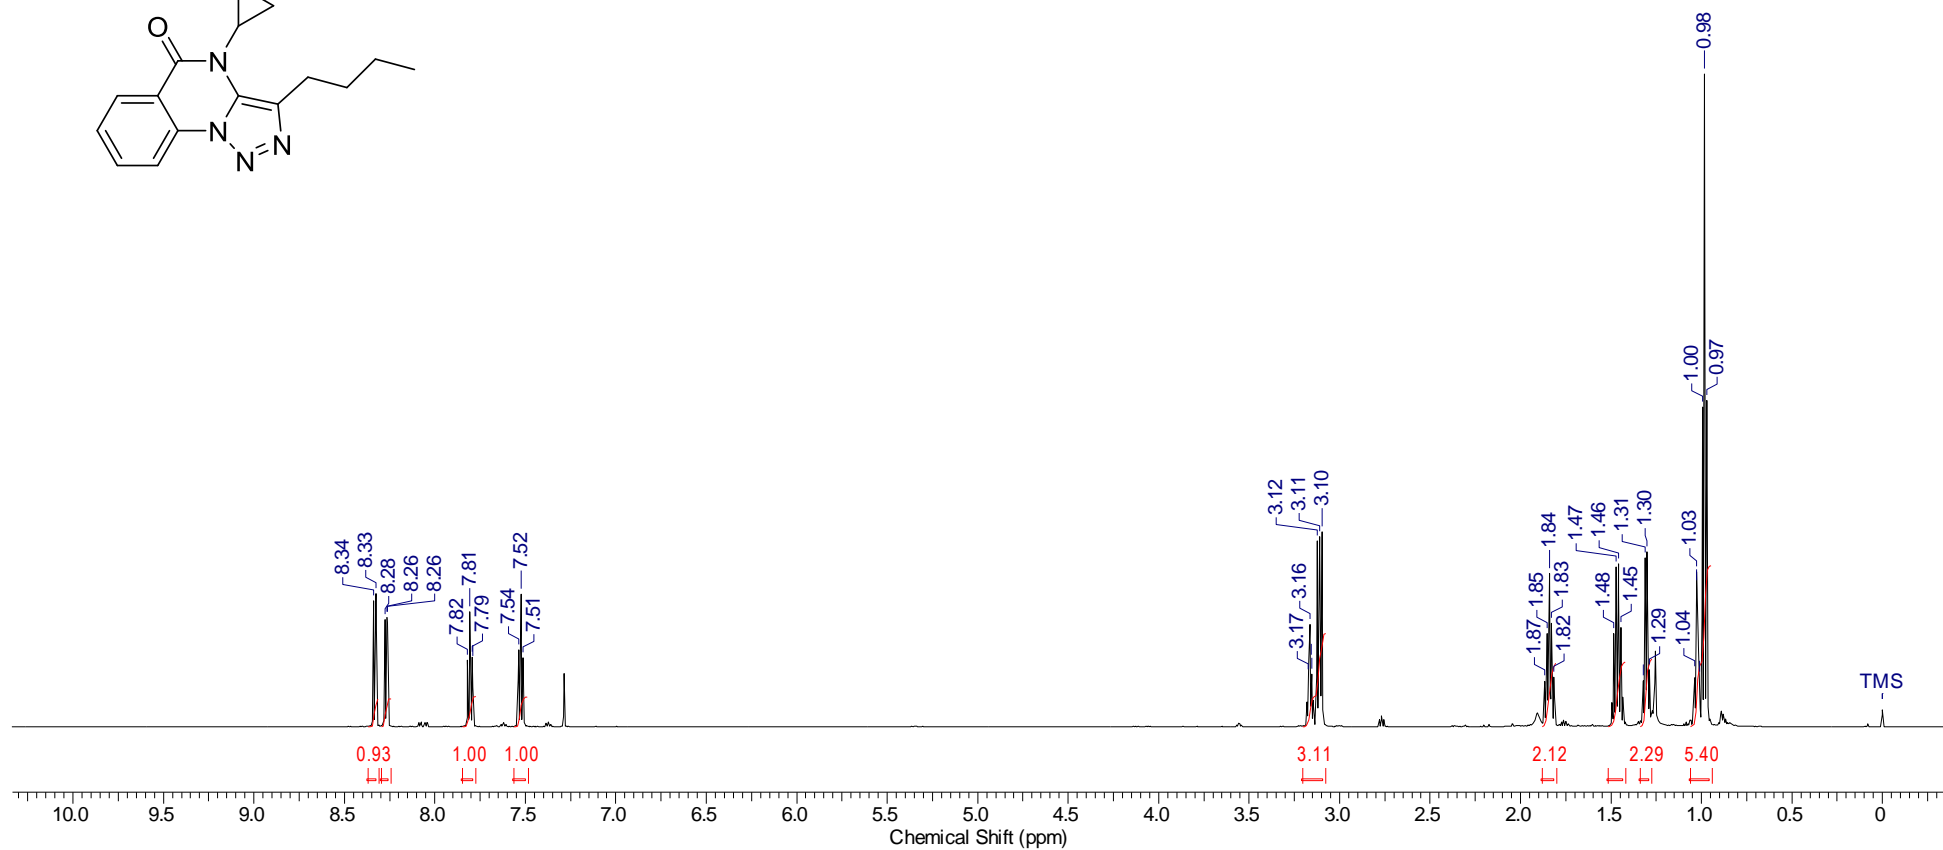

**3-Butyl-4-cyclopropyl[1,2,3]triazolo[1,5-a]quinazolin-5(4H)-one (2s)**

$^{13}\text{C}\{^1\text{H}\}$  NMR (151 MHz,  $\text{CDCl}_3$ )

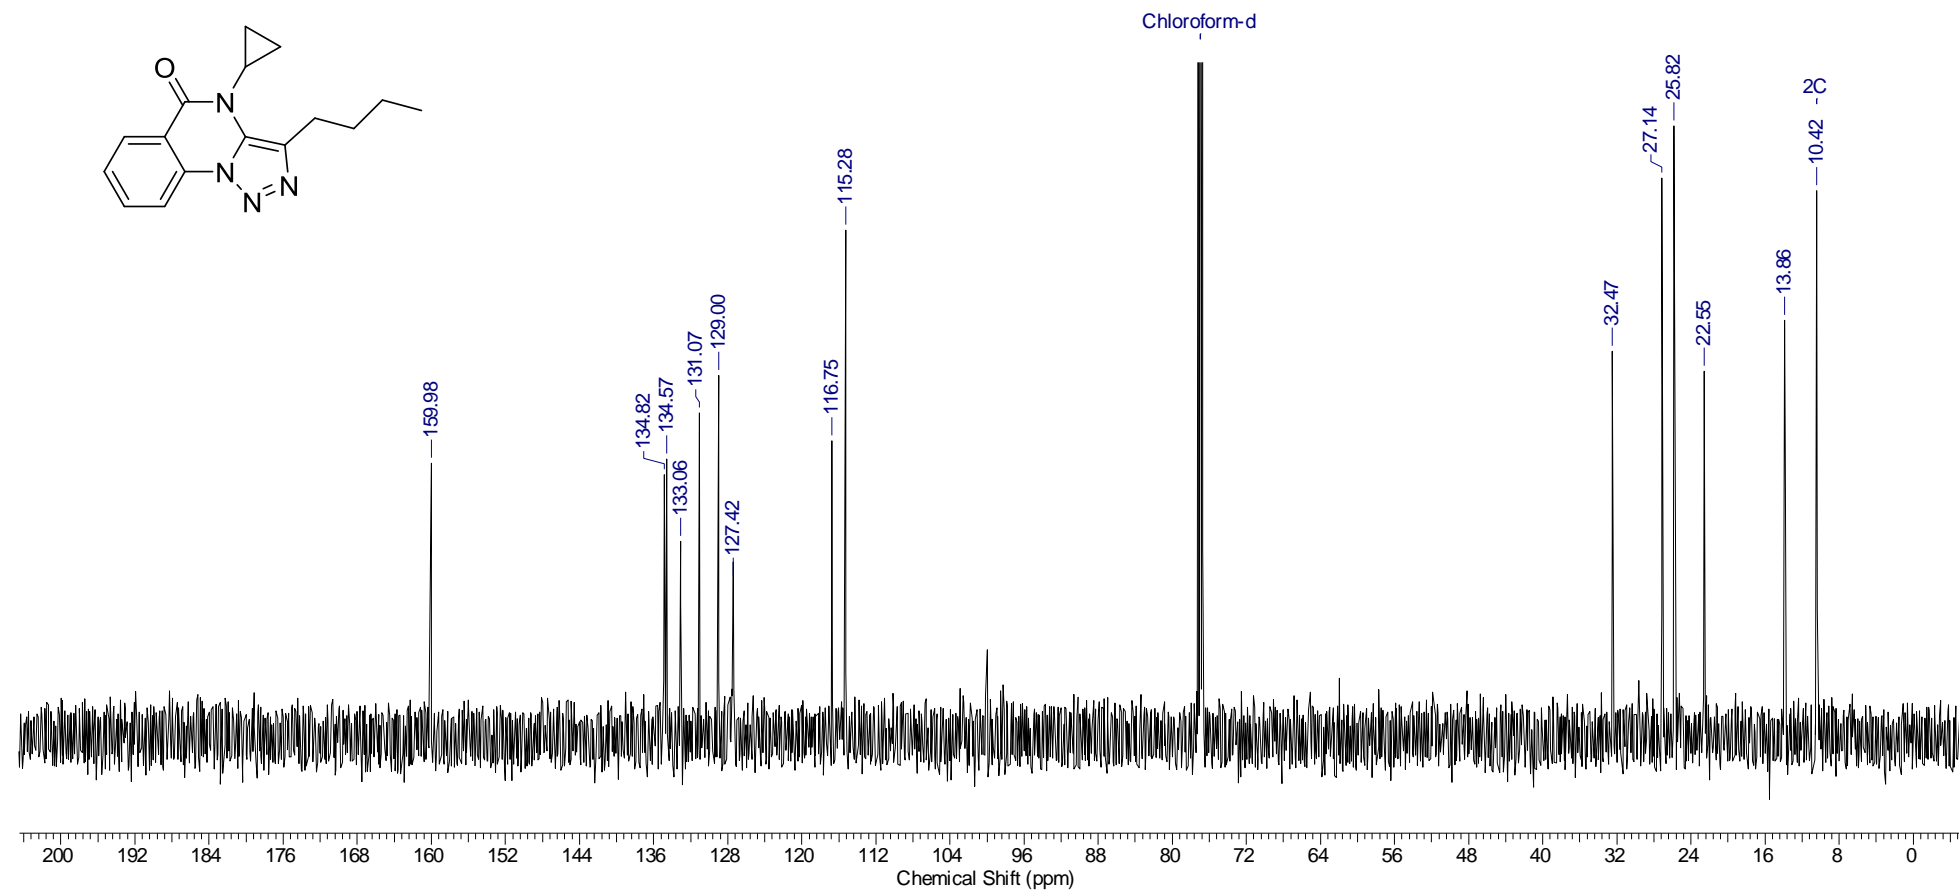

3-Butyl-4-cyclohexyl[1,2,3]triazolo[1,5-a]quinazolin-5(4H)-one (2t)

$^1\text{H}$  NMR (400 MHz,  $\text{CDCl}_3$ )

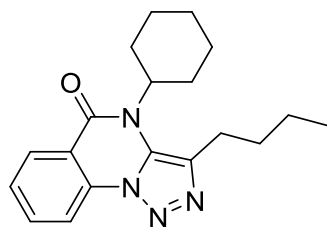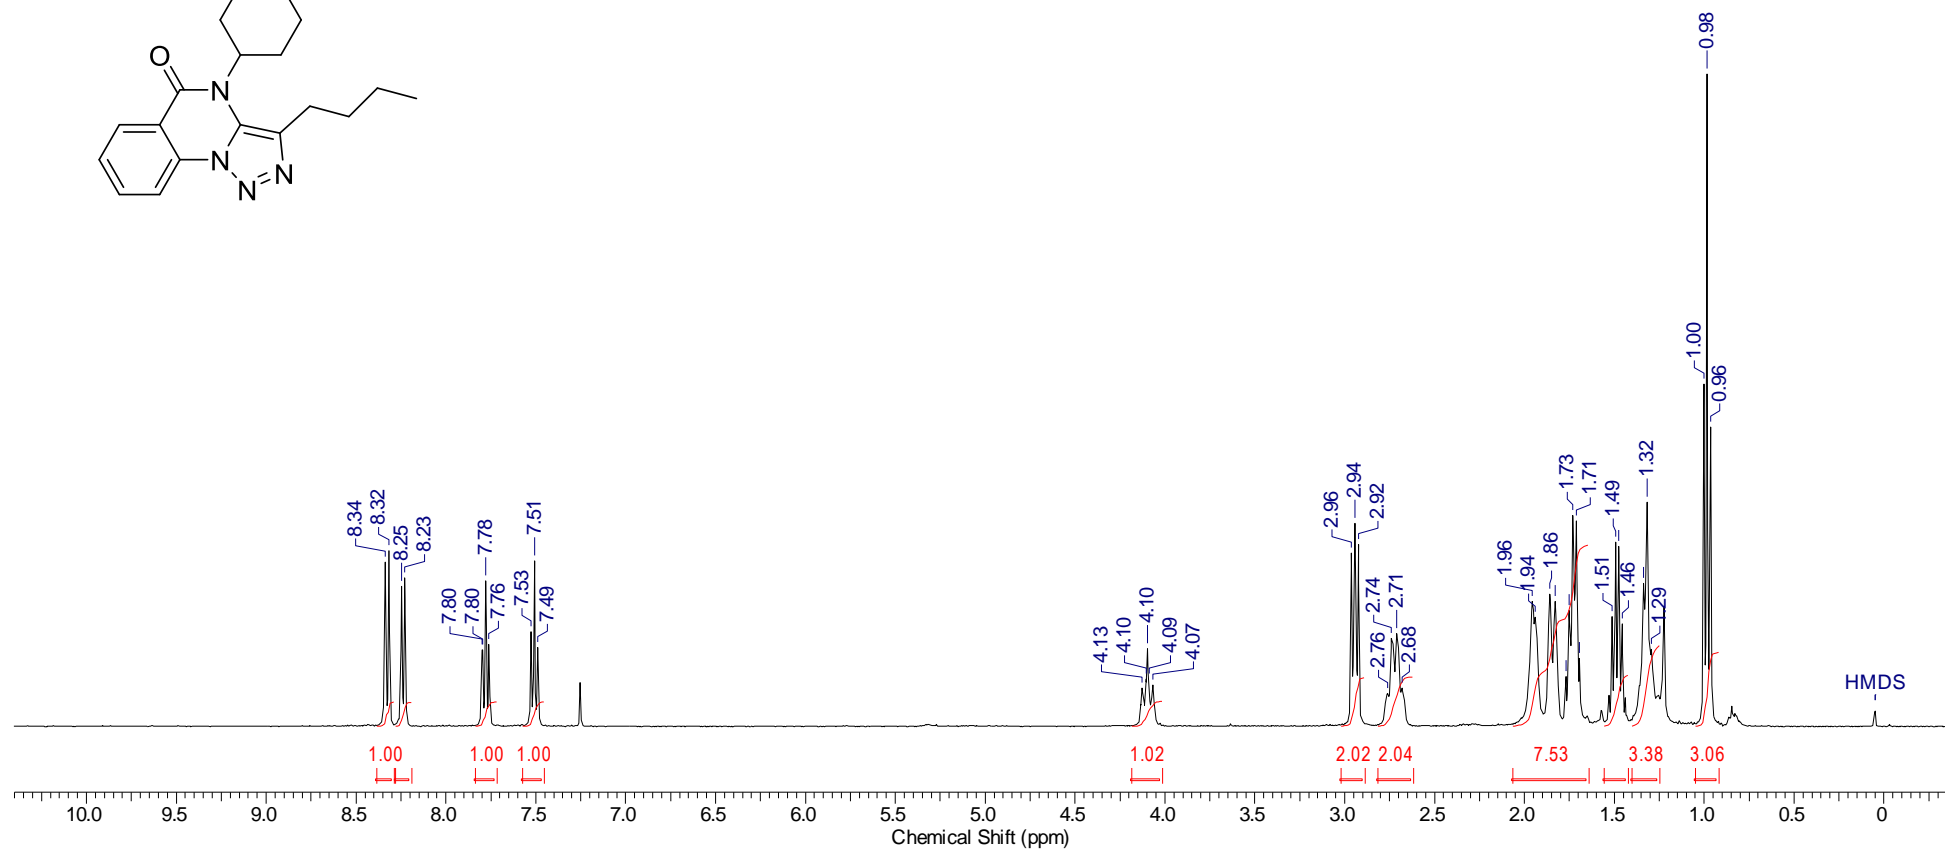

3-Butyl-4-cyclohexyl[1,2,3]triazolo[1,5-a]quinazolin-5(4H)-one (2t)

$^{13}\text{C}\{^1\text{H}\}$  NMR (100 MHz,  $\text{CDCl}_3$ )

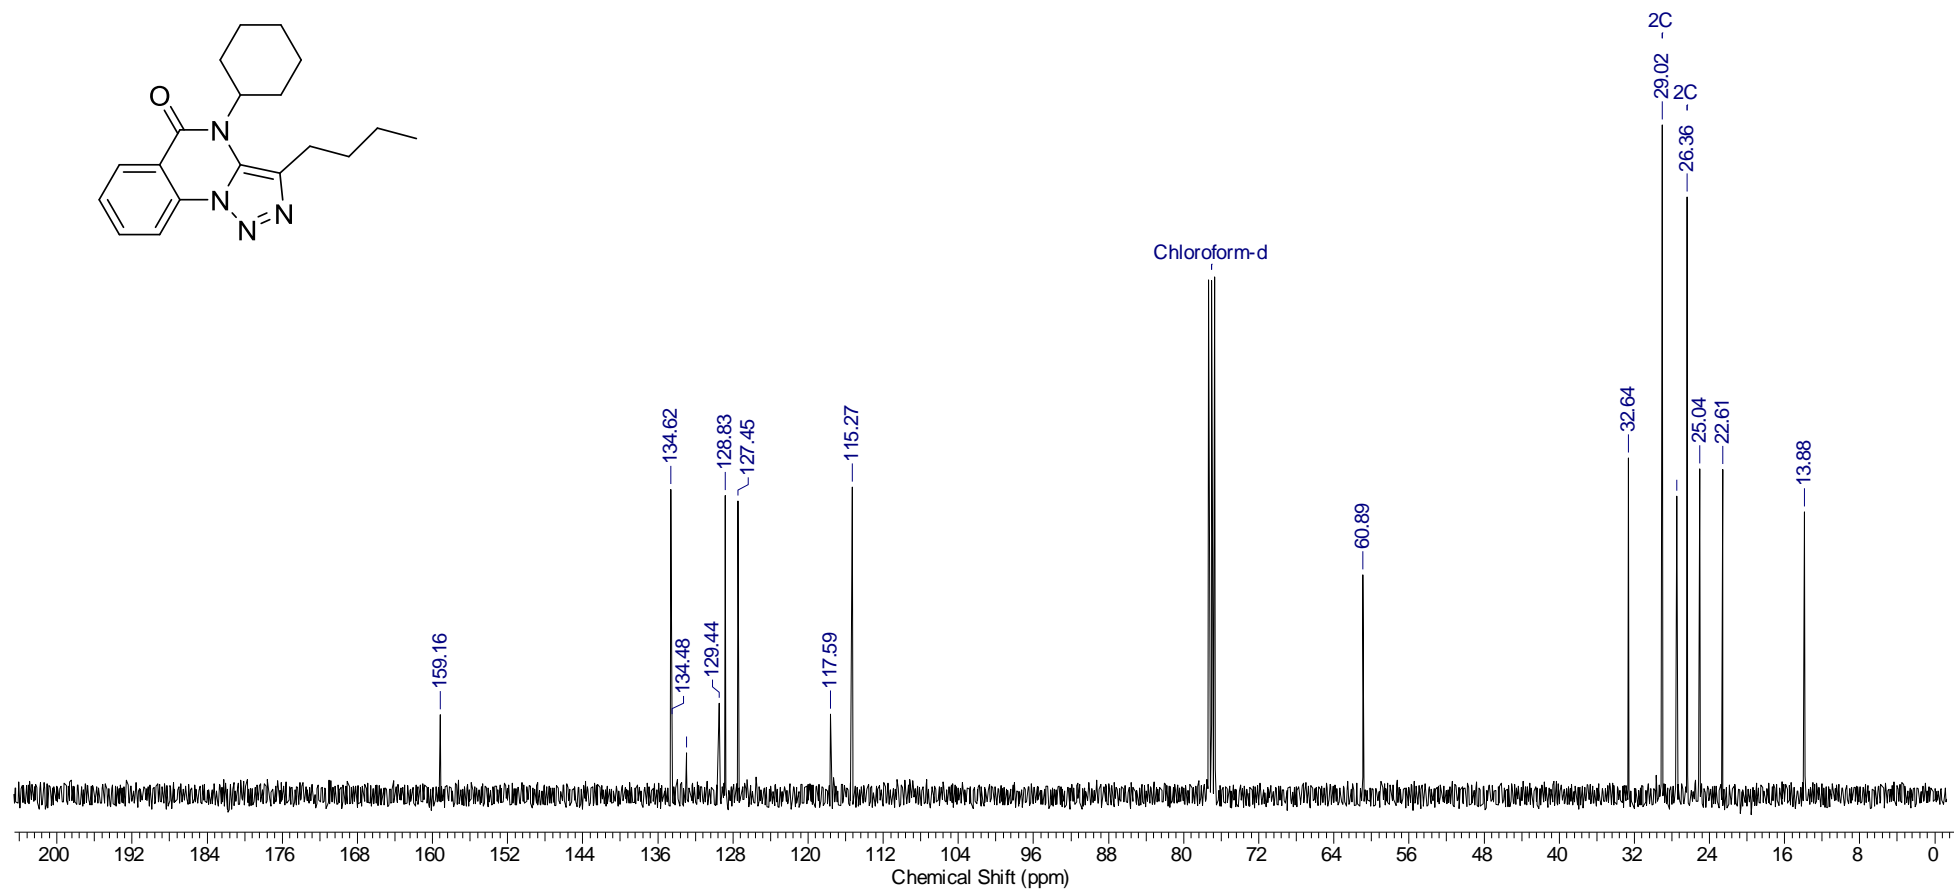

**3-Butyl-4-[(1*R*)-1-phenylethyl][1,2,3]triazolo[1,5-*a*]quinazolin-5(4*H*)-one (2u)**

<sup>1</sup>H NMR (400 MHz, CDCl<sub>3</sub>)

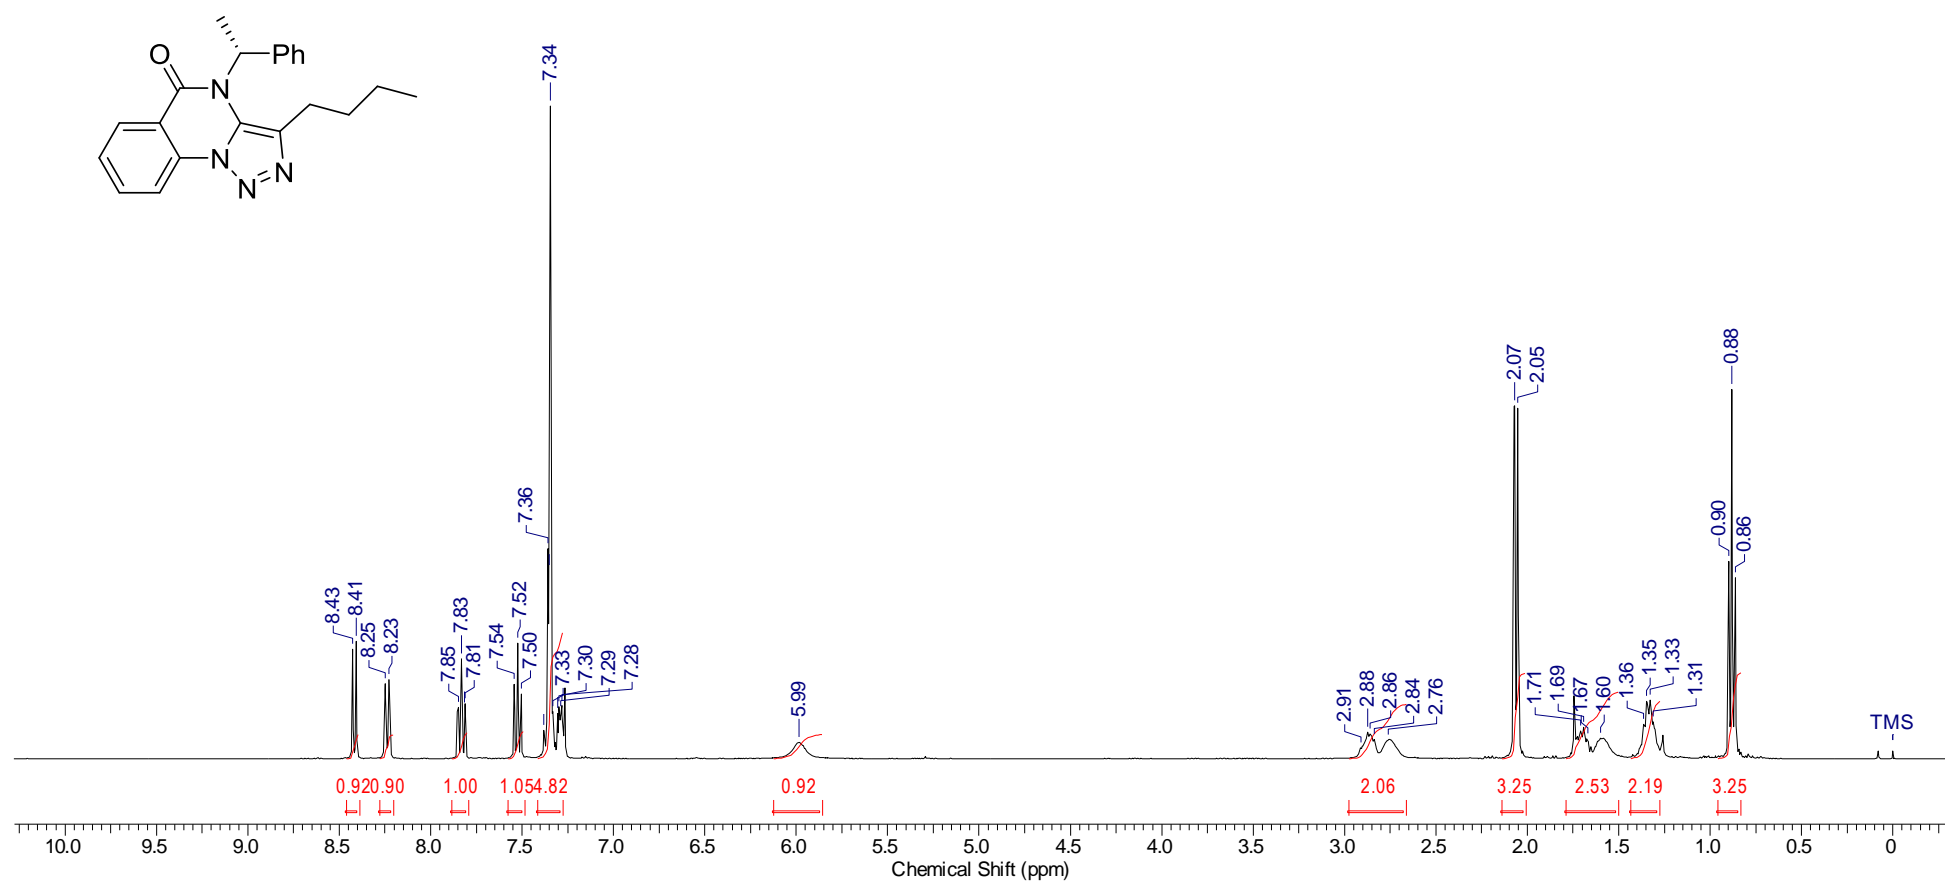

**3-Butyl-4-[(1*R*)-1-phenylethyl][1,2,3]triazolo[1,5-*a*]quinazolin-5(4*H*)-one (2u)**

$^{13}\text{C}\{^1\text{H}\}$  NMR (100 MHz,  $\text{CDCl}_3$ )

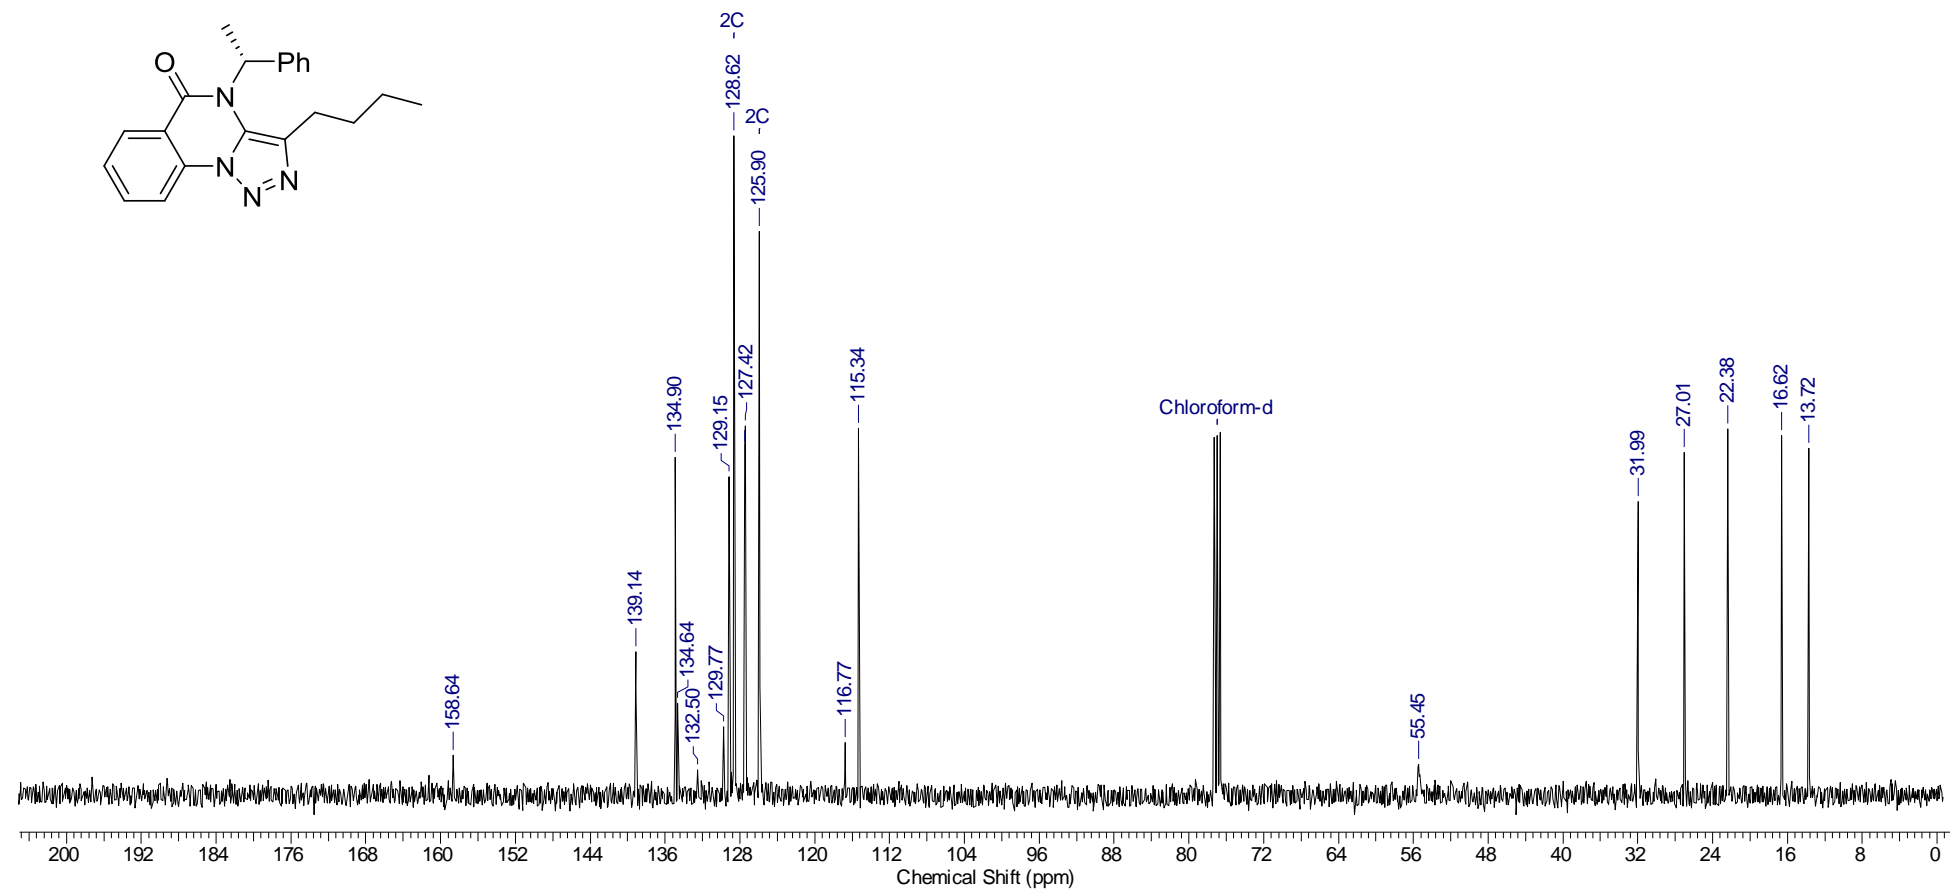

3-Butyl-4-(2-furylmethyl)[1,2,3]triazolo[1,5-a]quinazolin-5(4H)-one (2w)

$^1\text{H}$  NMR (400 MHz,  $\text{CDCl}_3$ )

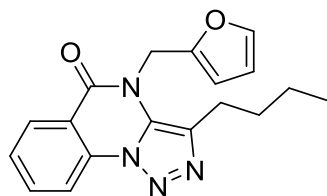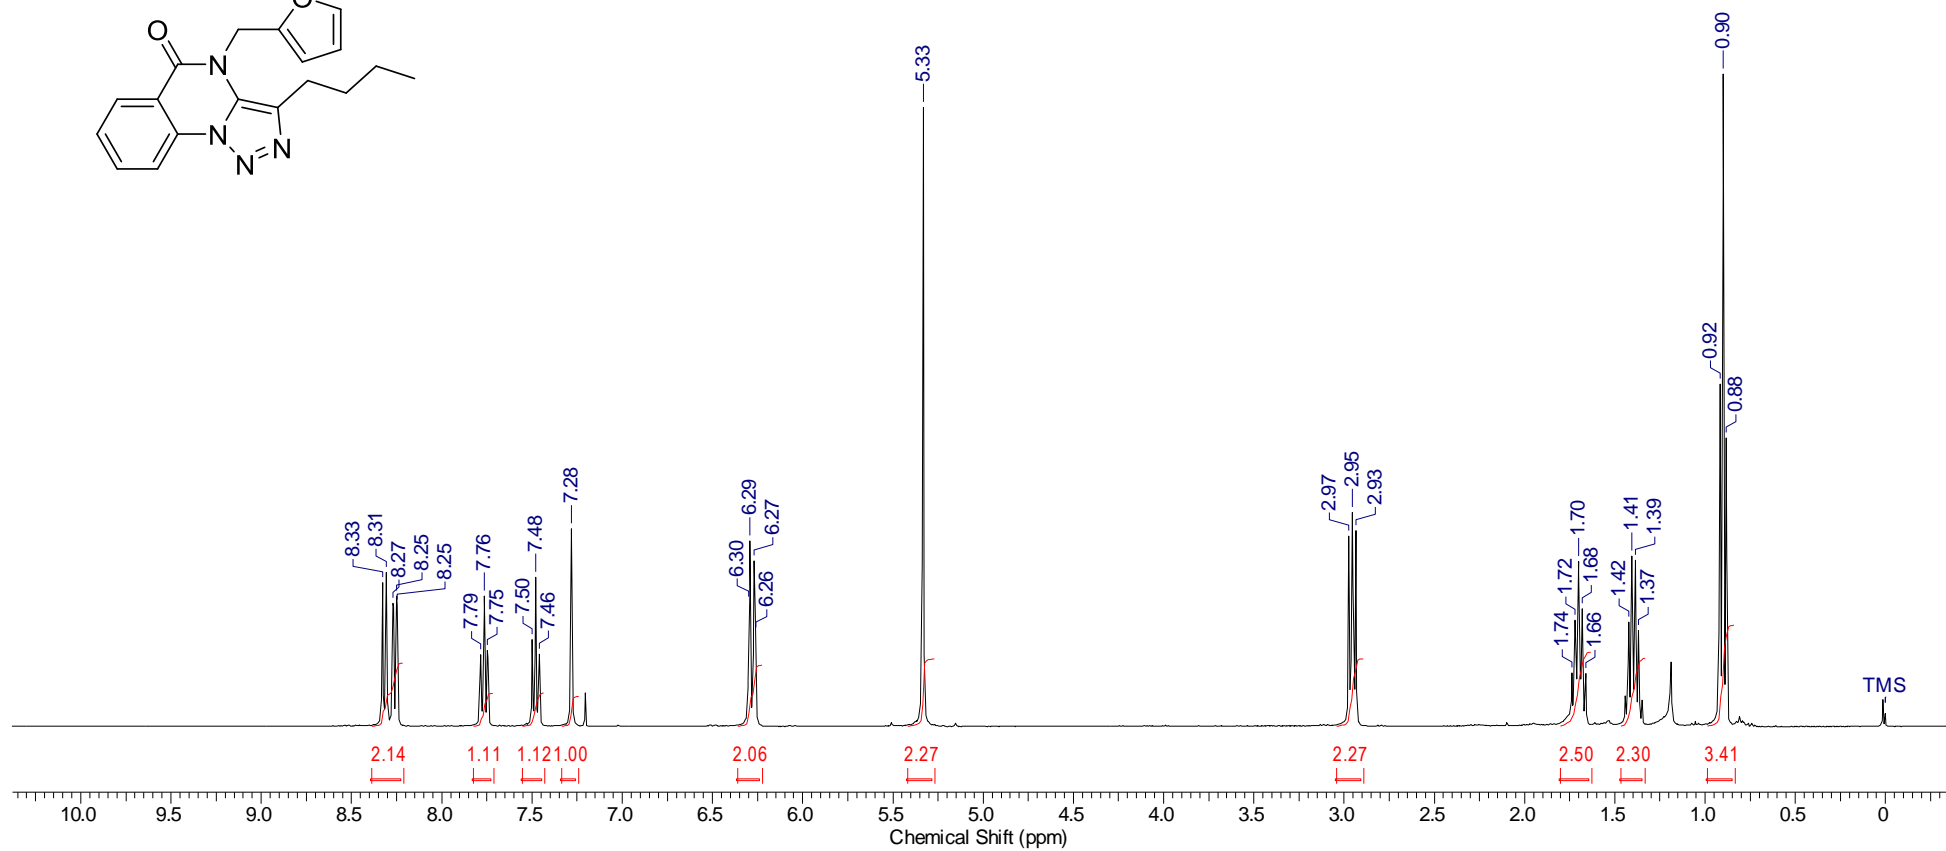



**3-Butyl-4-(2-furylmethyl)[1,2,3]triazolo[1,5-a]quinazolin-5(4H)-one (2w)**

$^{13}\text{C}\{^1\text{H}\}$  NMR (100 MHz,  $\text{CDCl}_3$ )

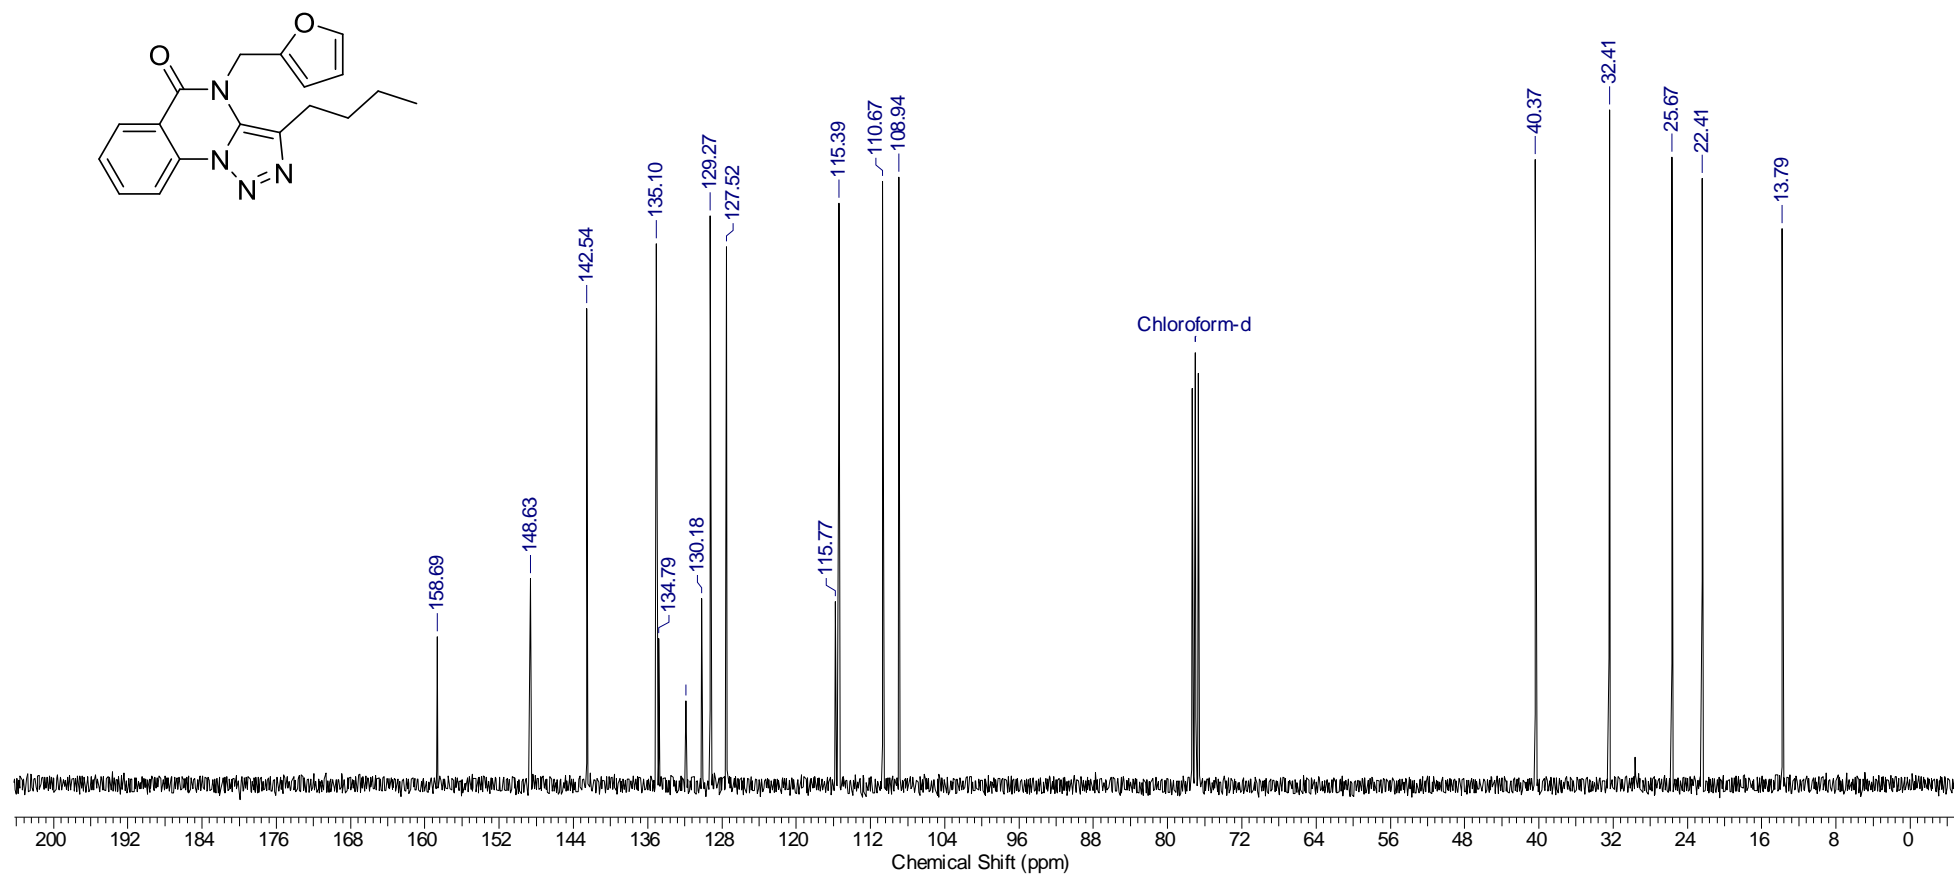

**3-Butyl-4-[2-(5-methoxy-1H-indol-3-yl)ethyl][1,2,3]triazolo[1,5-a]quinazolin-5(4H)-one (2x)**

<sup>1</sup>H NMR (400 MHz, CDCl<sub>3</sub>)

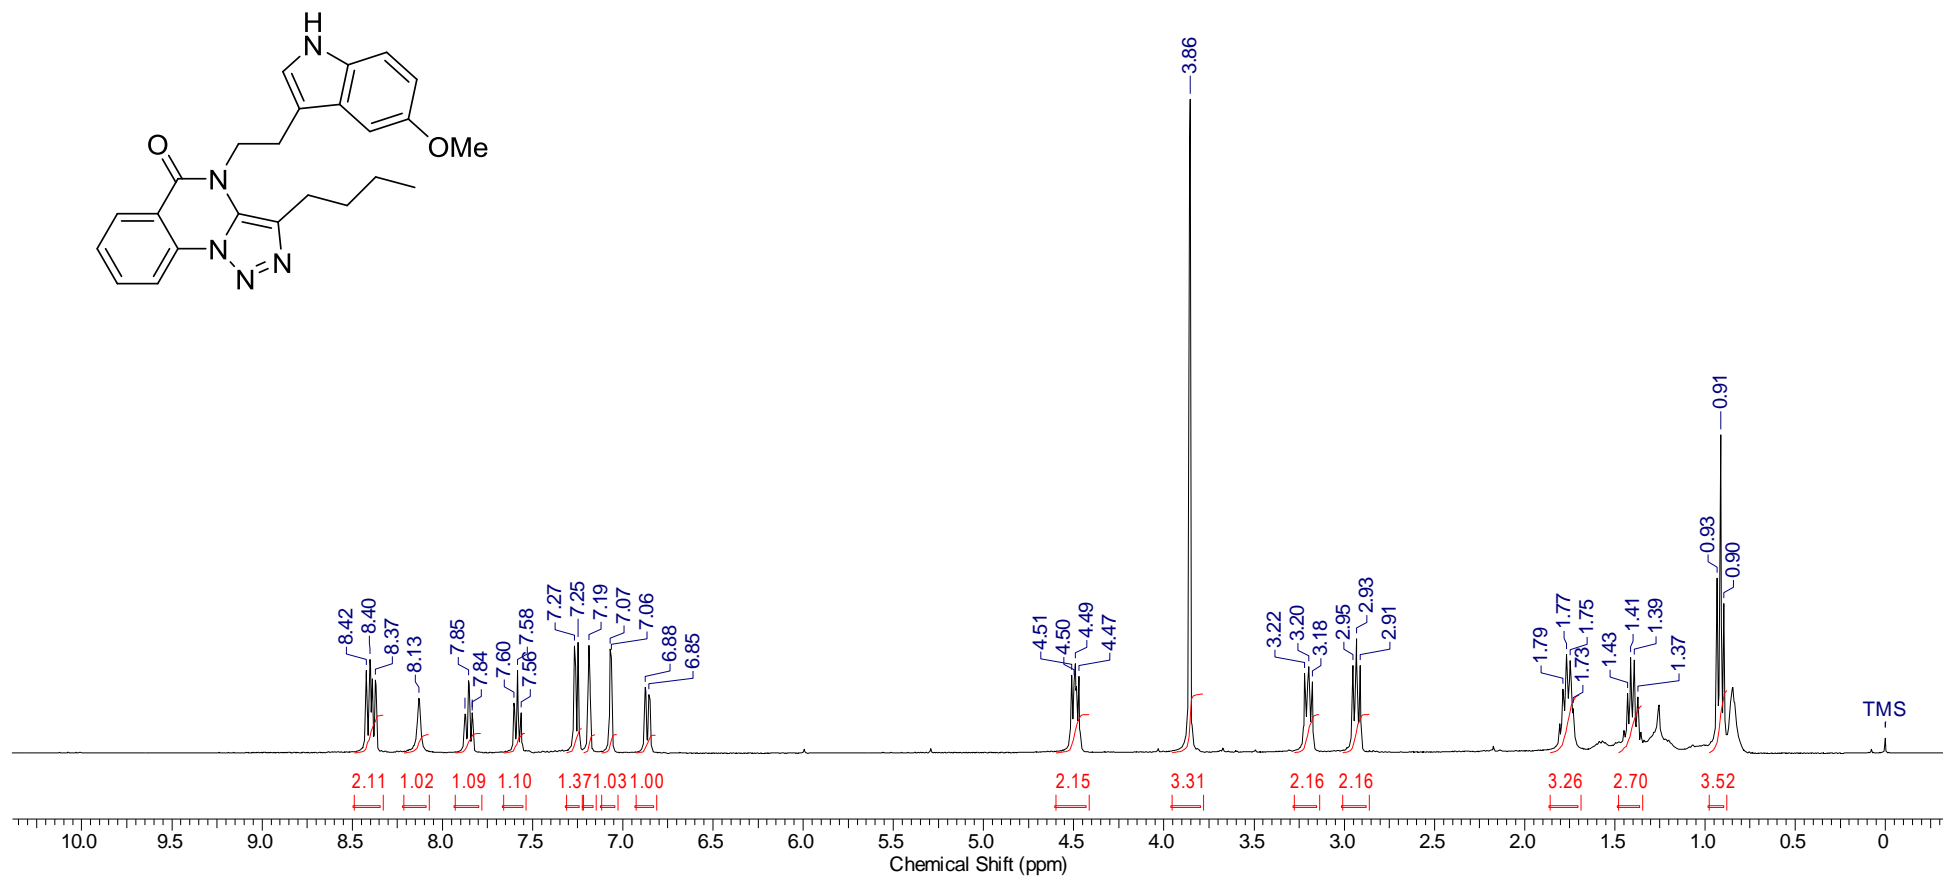

**3-Butyl-4-[2-(5-methoxy-1H-indol-3-yl)ethyl][1,2,3]triazolo[1,5-a]quinazolin-5(4H)-one (2x)**

$^{13}\text{C}\{^1\text{H}\}$  NMR (100 MHz,  $\text{CDCl}_3$ )

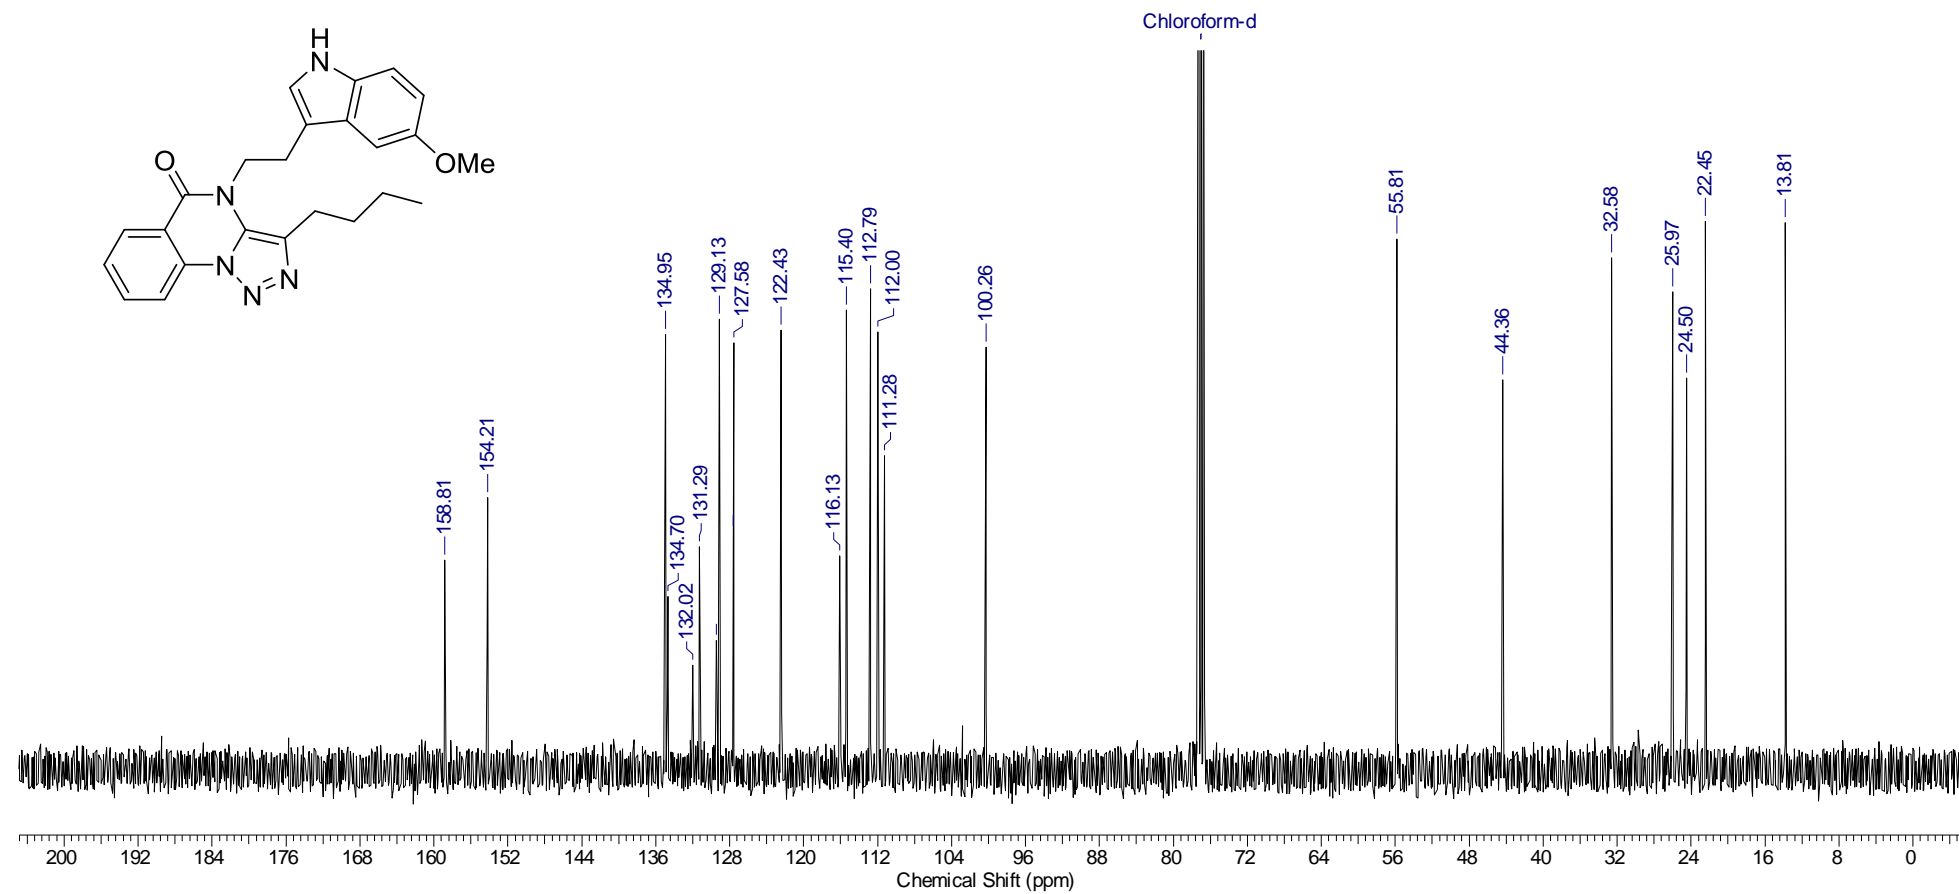

**3-Butyl-4-[2-(3,5-dimethylisoxazol-4-yl)ethyl][1,2,3]triazolo[1,5-a]quinazolin-5(4H)-one (2y)**

<sup>1</sup>H NMR (400 MHz, CDCl<sub>3</sub>)

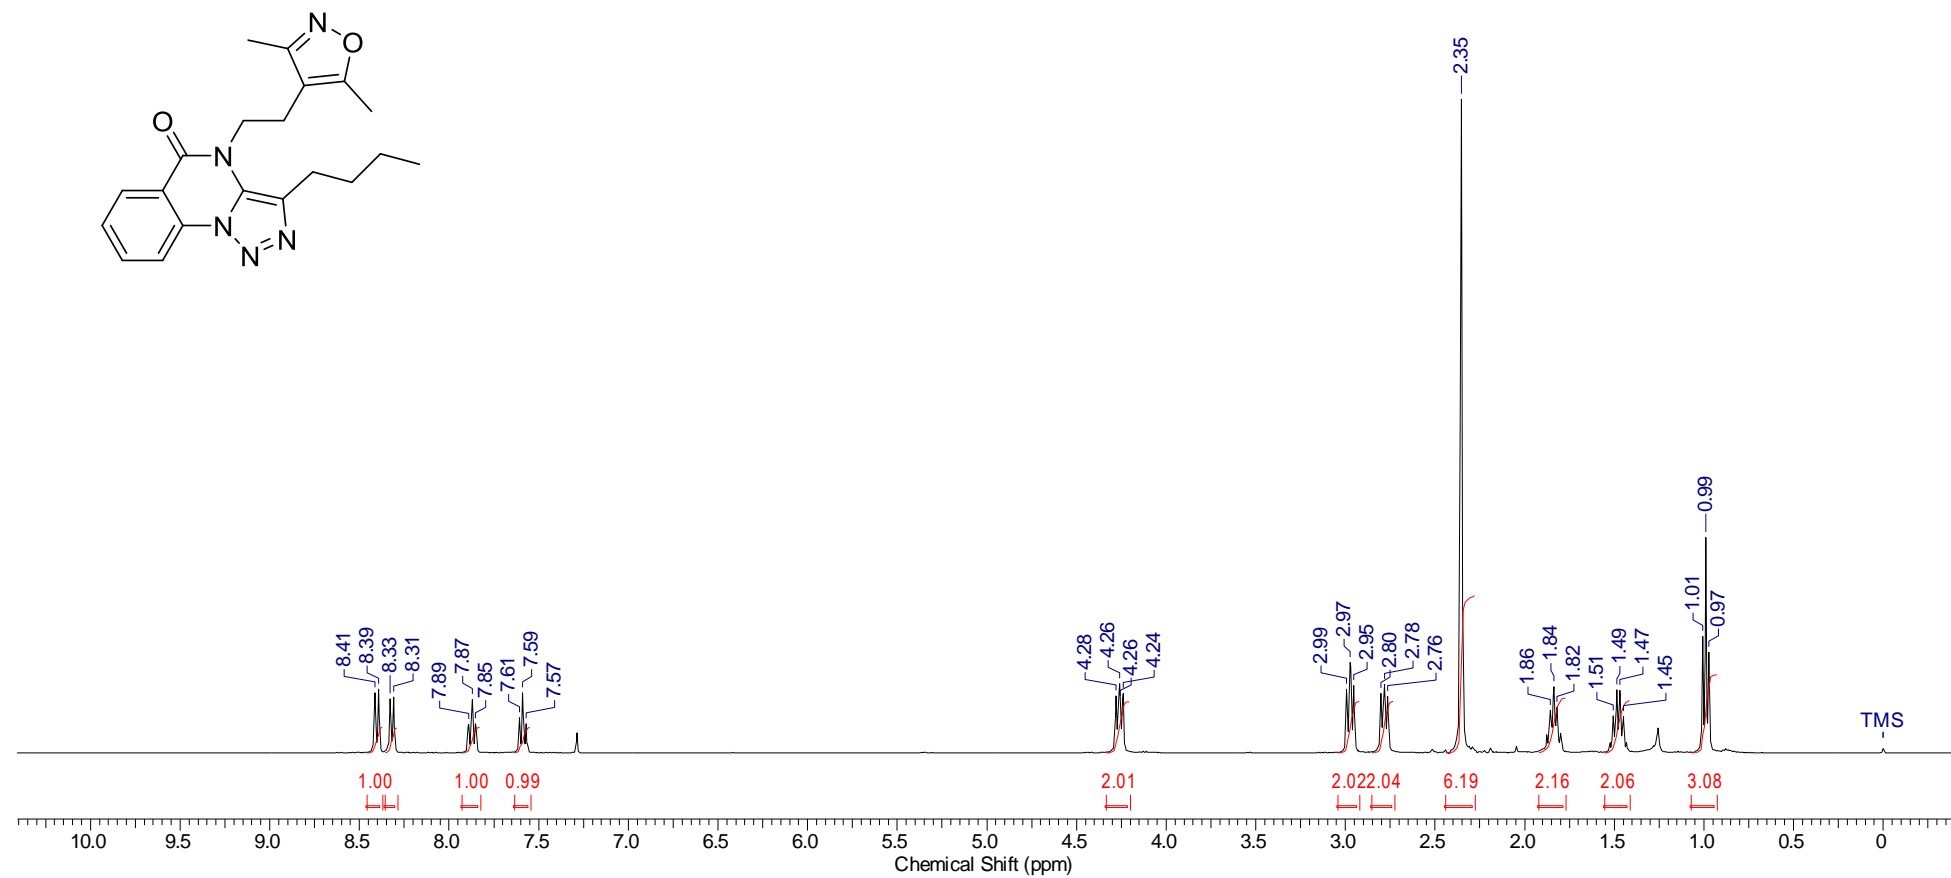

**3-Butyl-4-[2-(3,5-dimethylisoxazol-4-yl)ethyl][1,2,3]triazolo[1,5-a]quinazolin-5(4H)-one (2y)**

$^{13}\text{C}\{^1\text{H}\}$  NMR (100 MHz,  $\text{CDCl}_3$ )

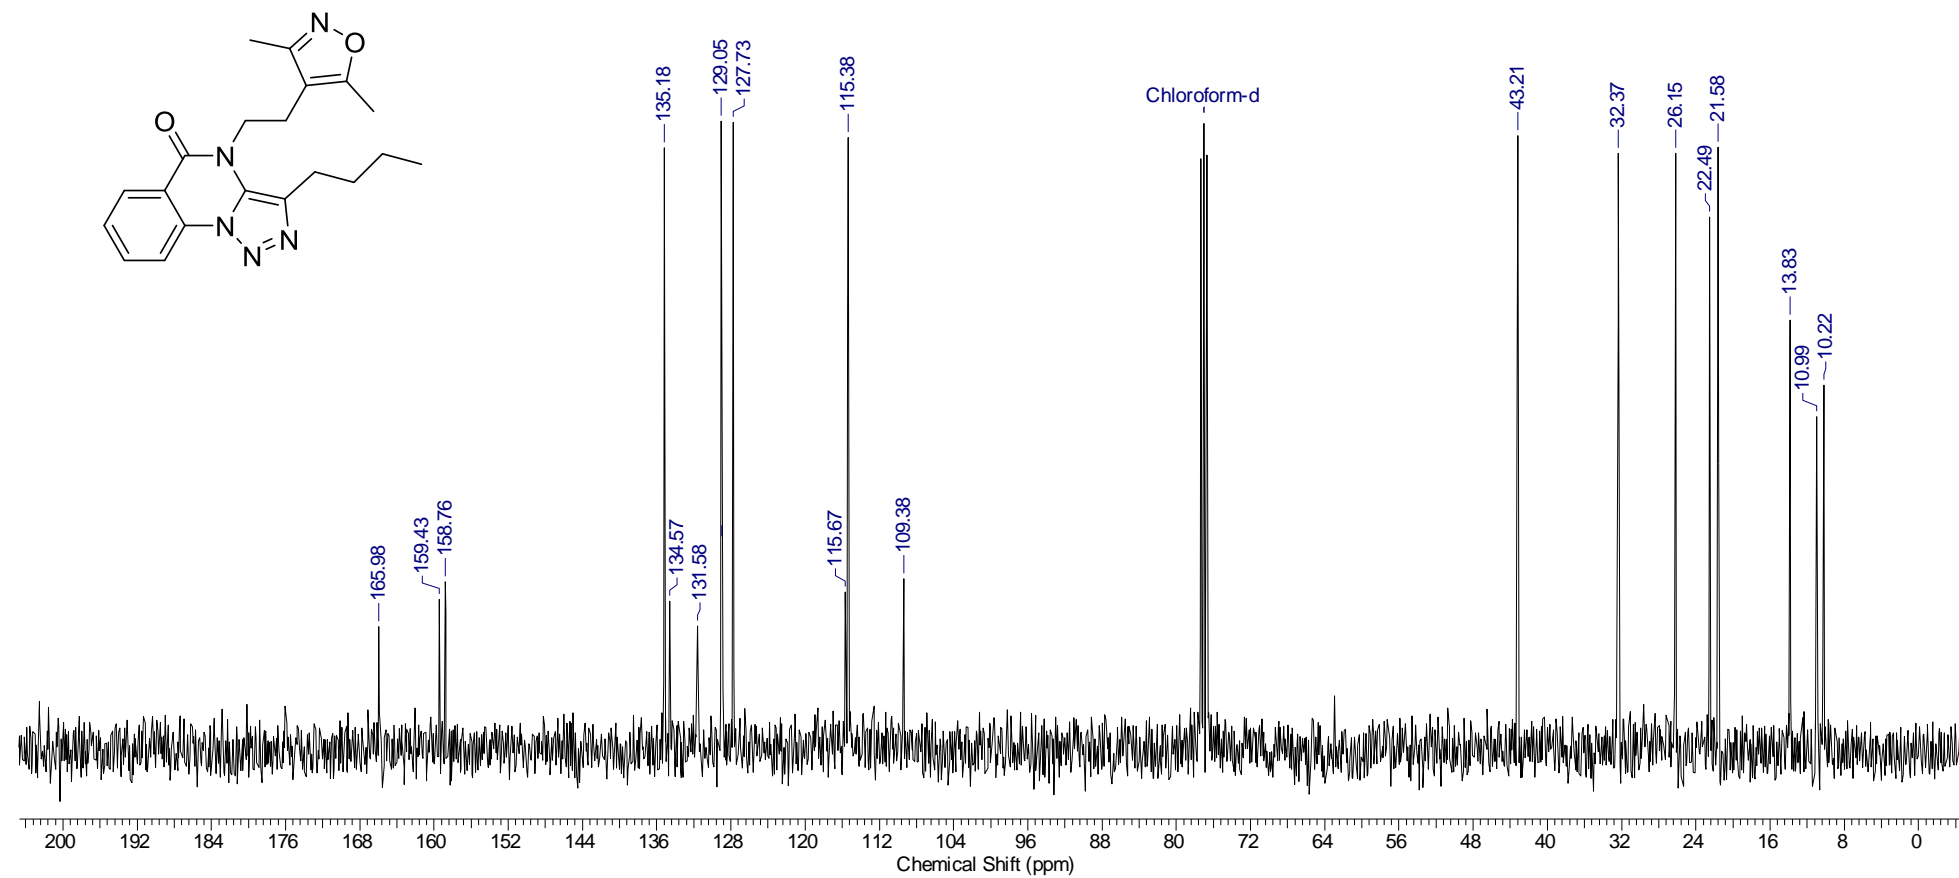

4,4'-Butane-1,4-diylbis(3-butyl[1,2,3]triazolo[1,5-a]quinazolin-5(4H)-one) (2aa)

<sup>1</sup>H NMR (400 MHz, CDCl<sub>3</sub>-CD<sub>3</sub>OD)

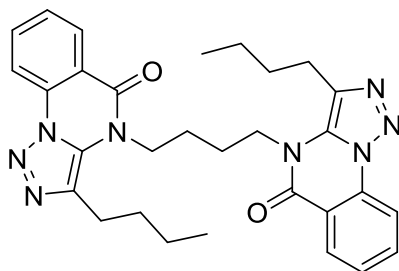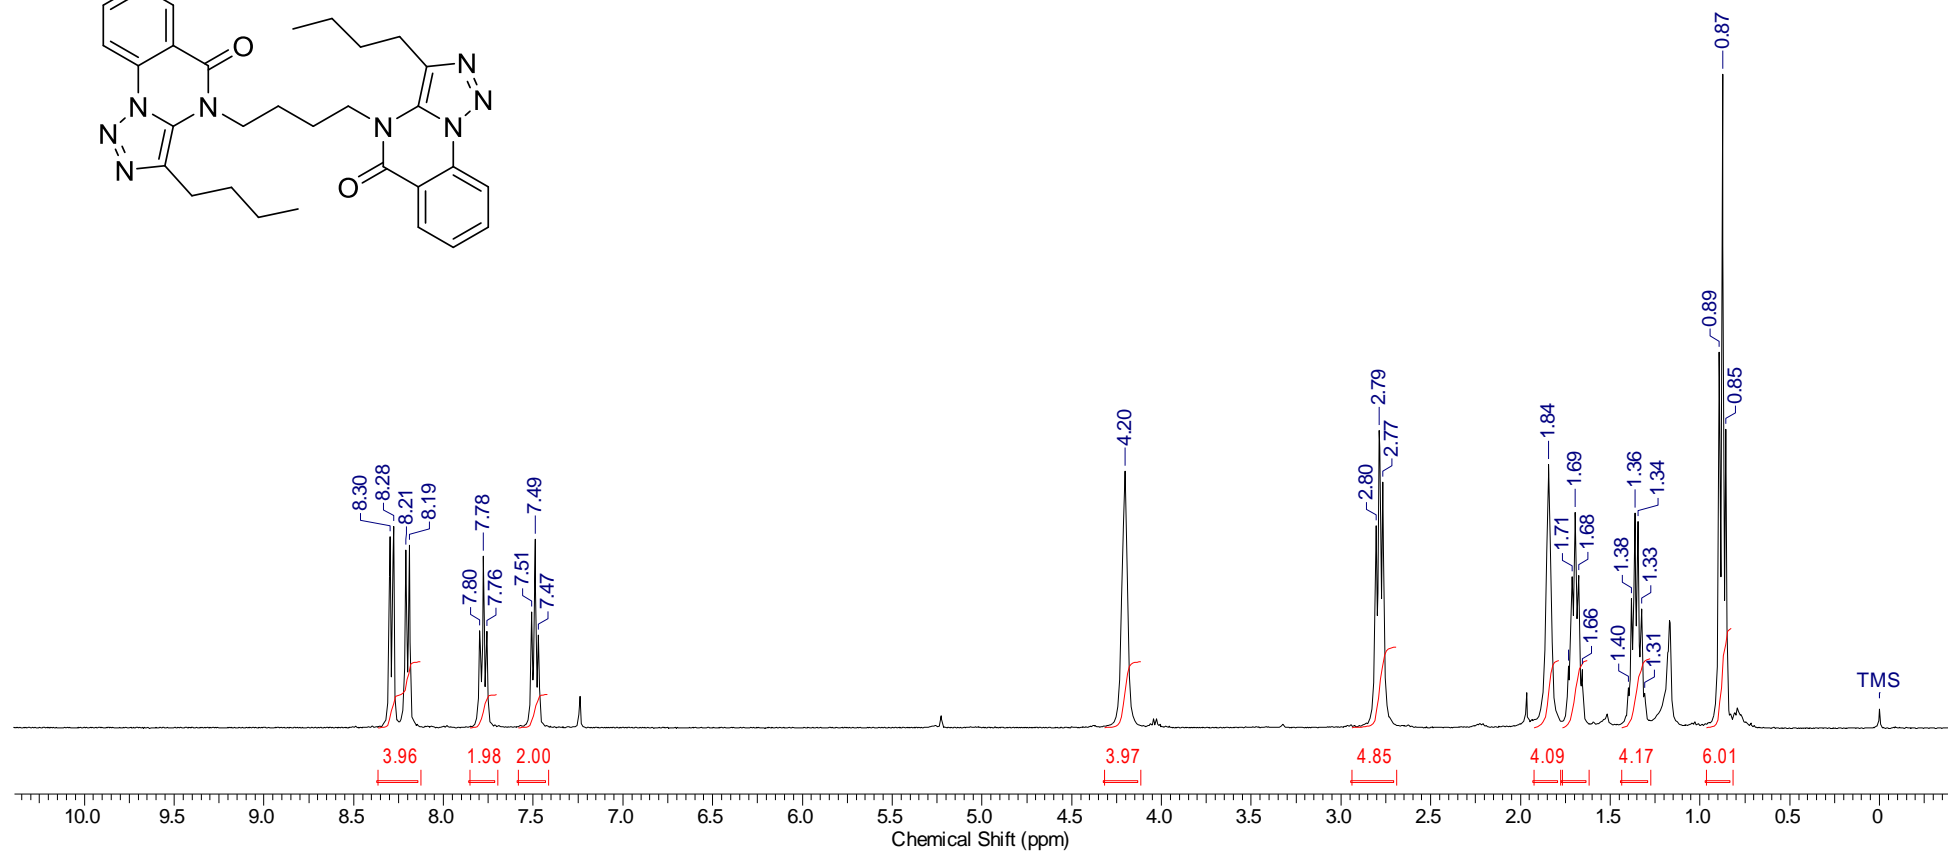

**4,4'-Butane-1,4-diylbis(3-butyl[1,2,3]triazolo[1,5-*a*]quinazolin-5(4*H*)-one) (2aa)**

$^{13}\text{C}\{^1\text{H}\}$  NMR (100 MHz,  $\text{CDCl}_3\text{-CD}_3\text{OD}$ )

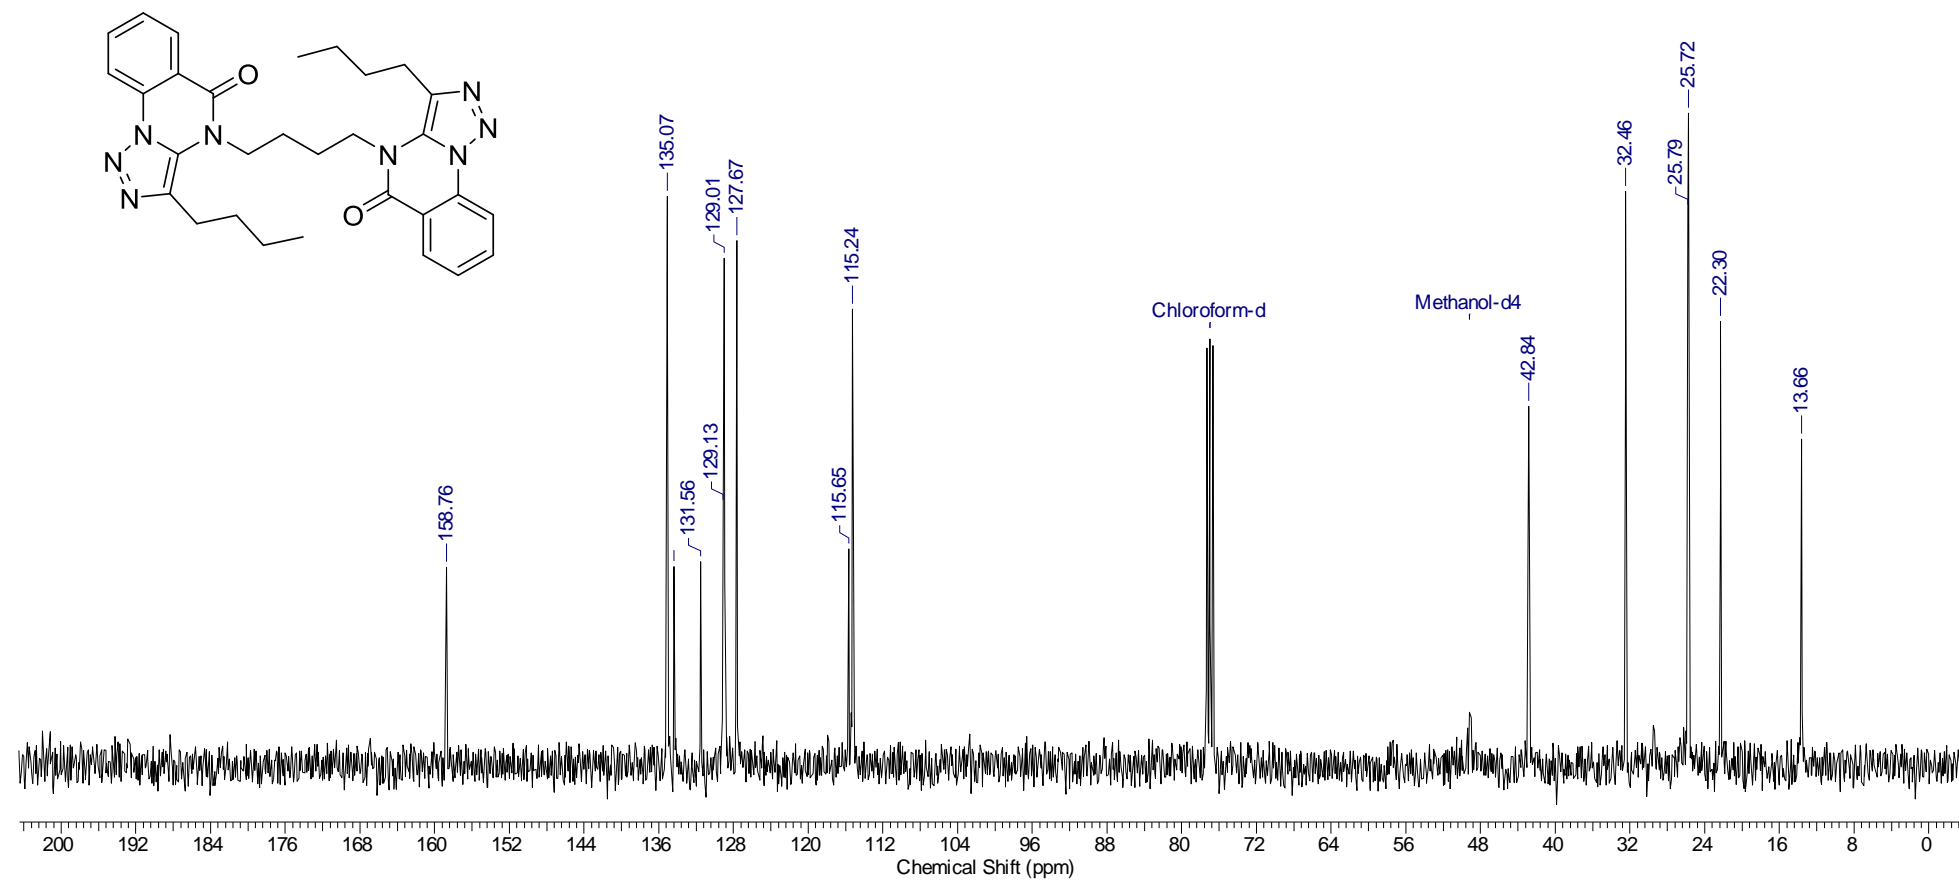

3-Butyl-4-[(3 $\alpha$ ,5 $\beta$ ,12 $\alpha$ )-3,12-dihydrocholan-24-yl][1,2,3]triazolo[1,5-*a*]quinazolin-5(4*H*)-one (2ab)

<sup>1</sup>H NMR (400 MHz, CDCl<sub>3</sub>)

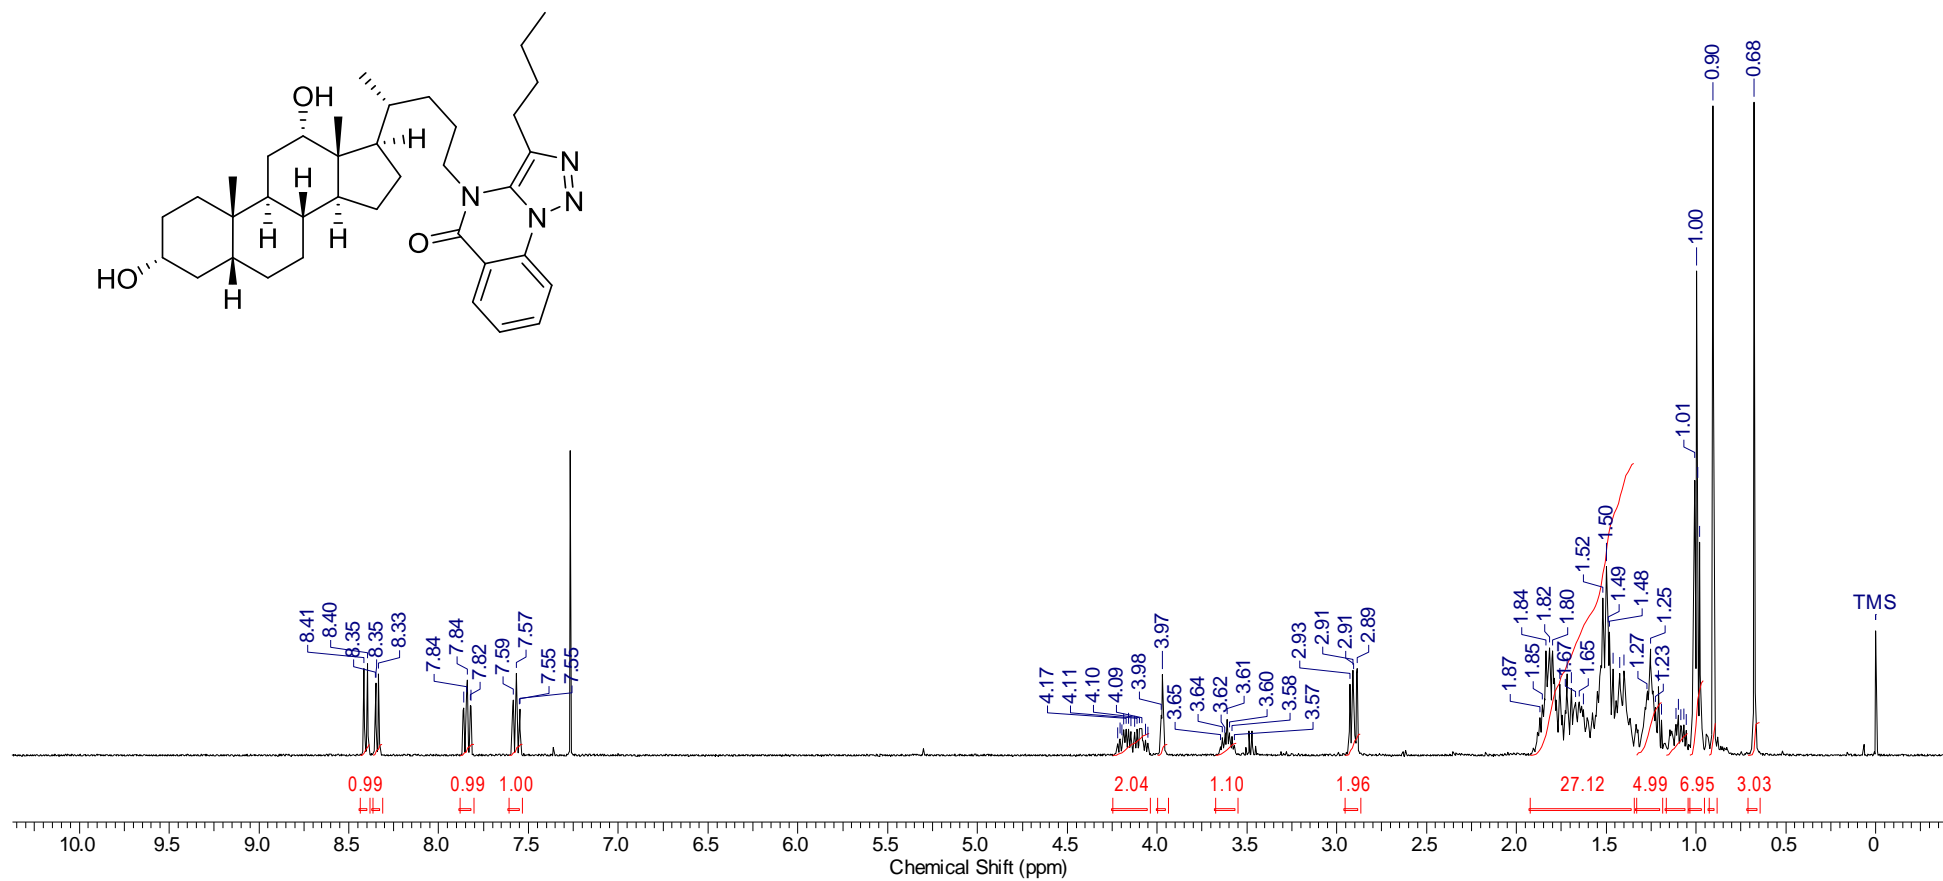



**3-Butyl-4-[(3 $\alpha$ ,5 $\beta$ ,12 $\alpha$ )-3,12-dihydrocholan-24-yl][1,2,3]triazolo[1,5-*a*]quinazolin-5(4*H*)-one (2ab)**

$^{13}\text{C}\{^1\text{H}\}$  NMR (100 MHz,  $\text{CDCl}_3$ )

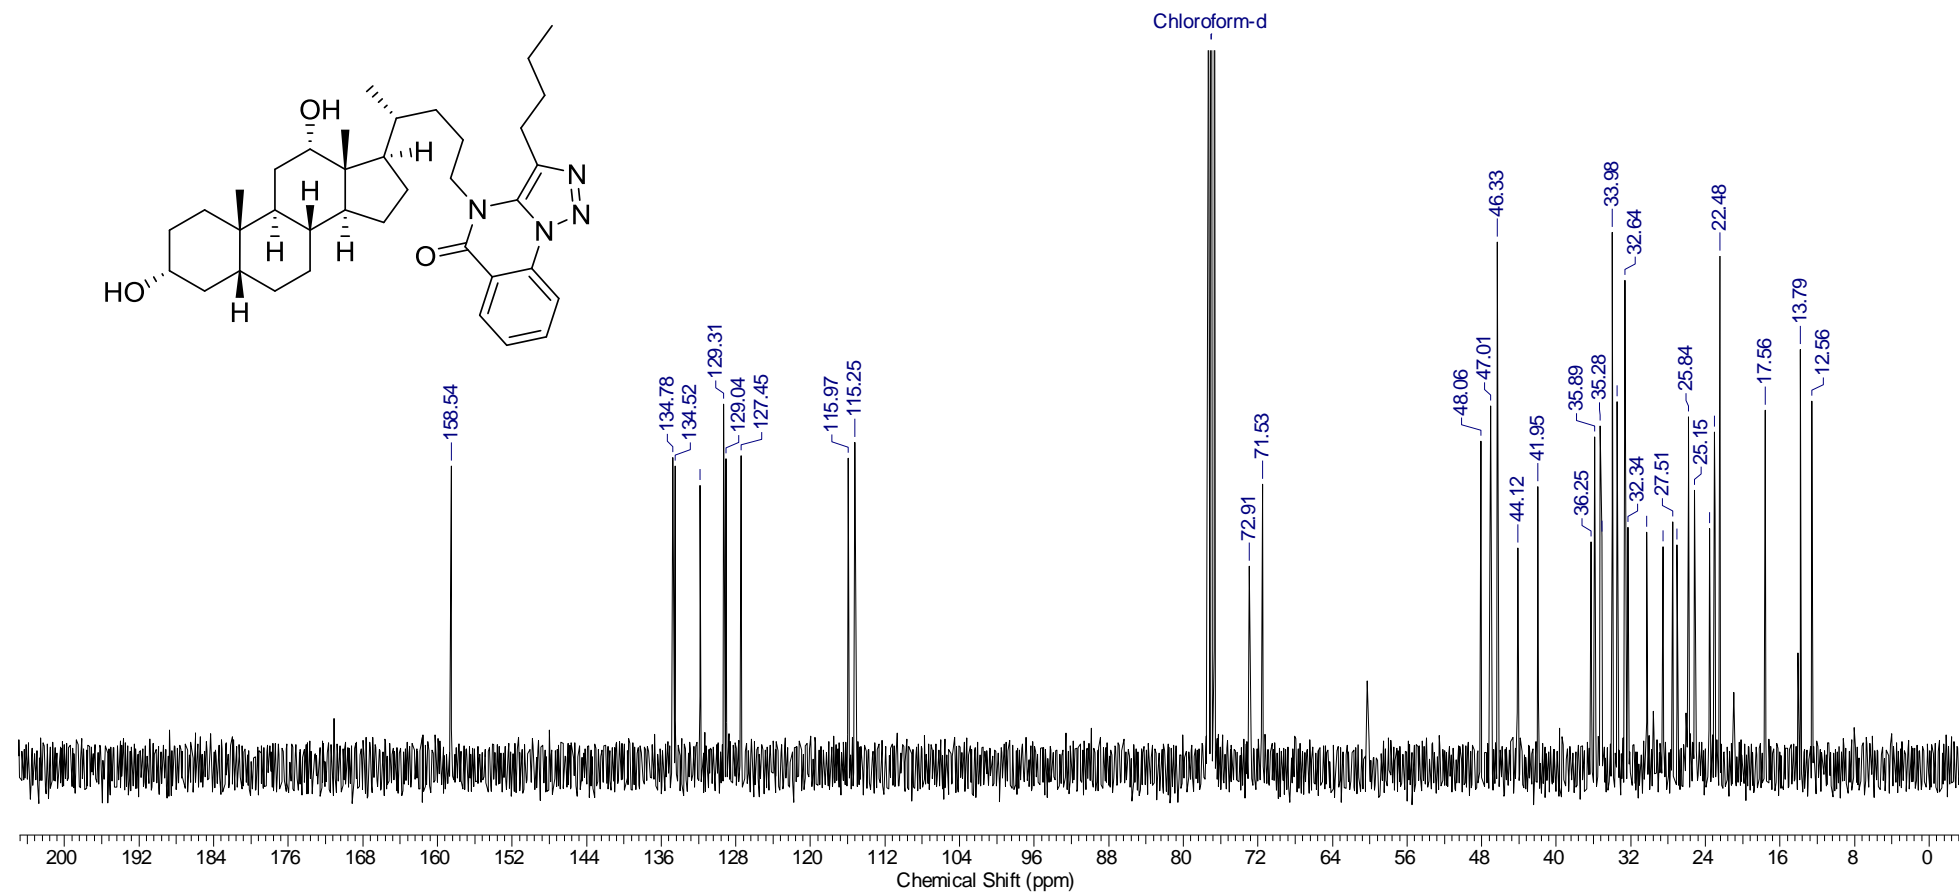

**3-Butyl-N-methyl-5H-[1,2,3]triazolo[1,5-a][3,1]benzoxazin-5-imine (3a)**

<sup>1</sup>H NMR (400 MHz, CDCl<sub>3</sub>)

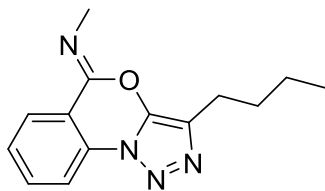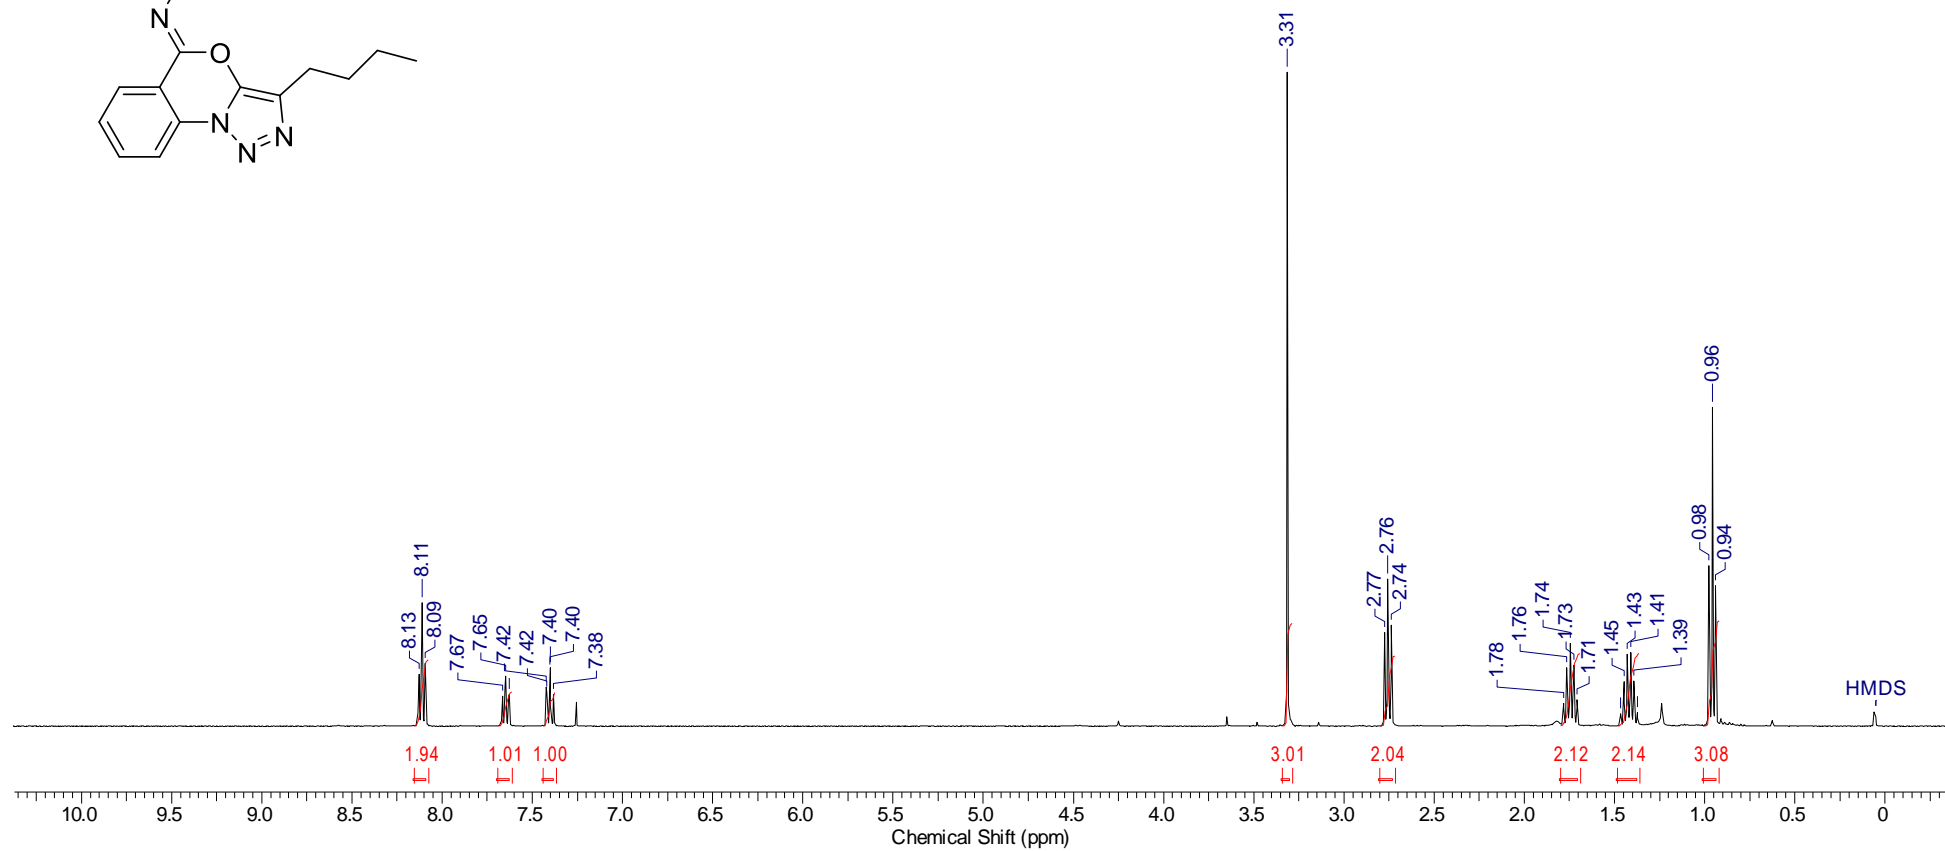

**3-Butyl-N-methyl-5H-[1,2,3]triazolo[1,5-a][3,1]benzoxazin-5-imine (3a)**

$^{13}\text{C}\{^1\text{H}\}$  NMR (100 MHz,  $\text{CDCl}_3$ )

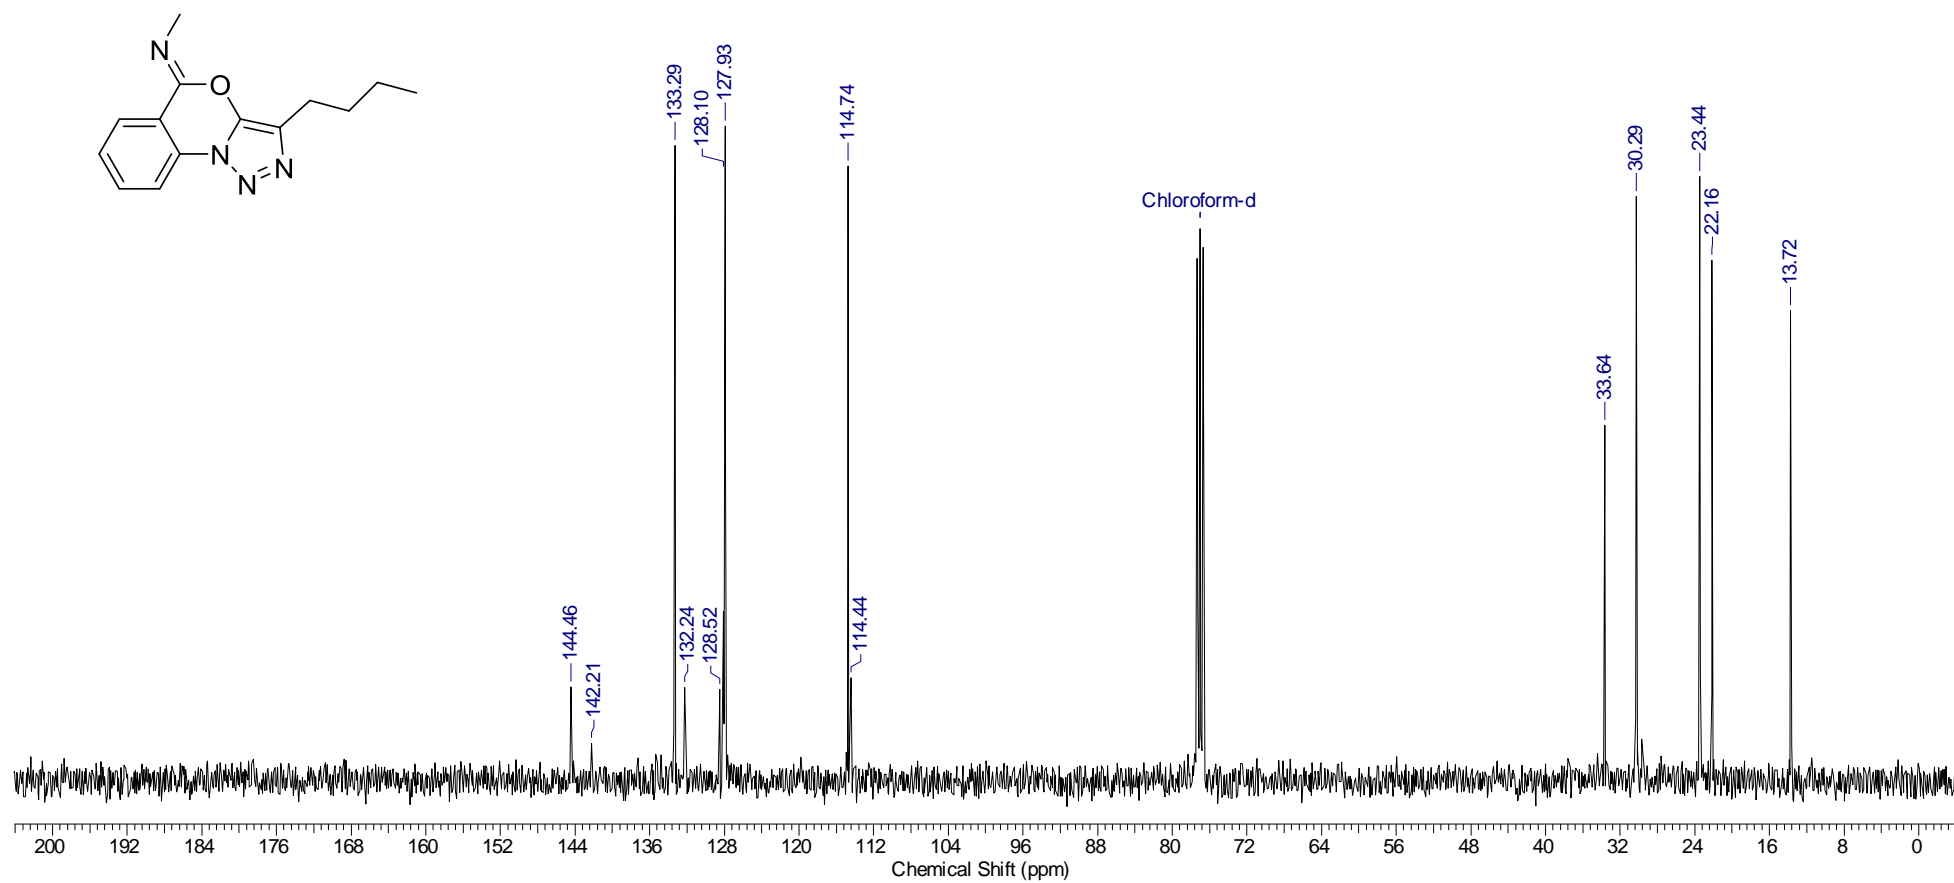

**3-Butyl-N-methyl-5H-[1,2,3]triazolo[1,5-a][3,1]benzoxazin-5-imine (3a)**

$^1\text{H}$ - $^1\text{H}$  NOESY (600 MHz,  $\text{CDCl}_3$ )

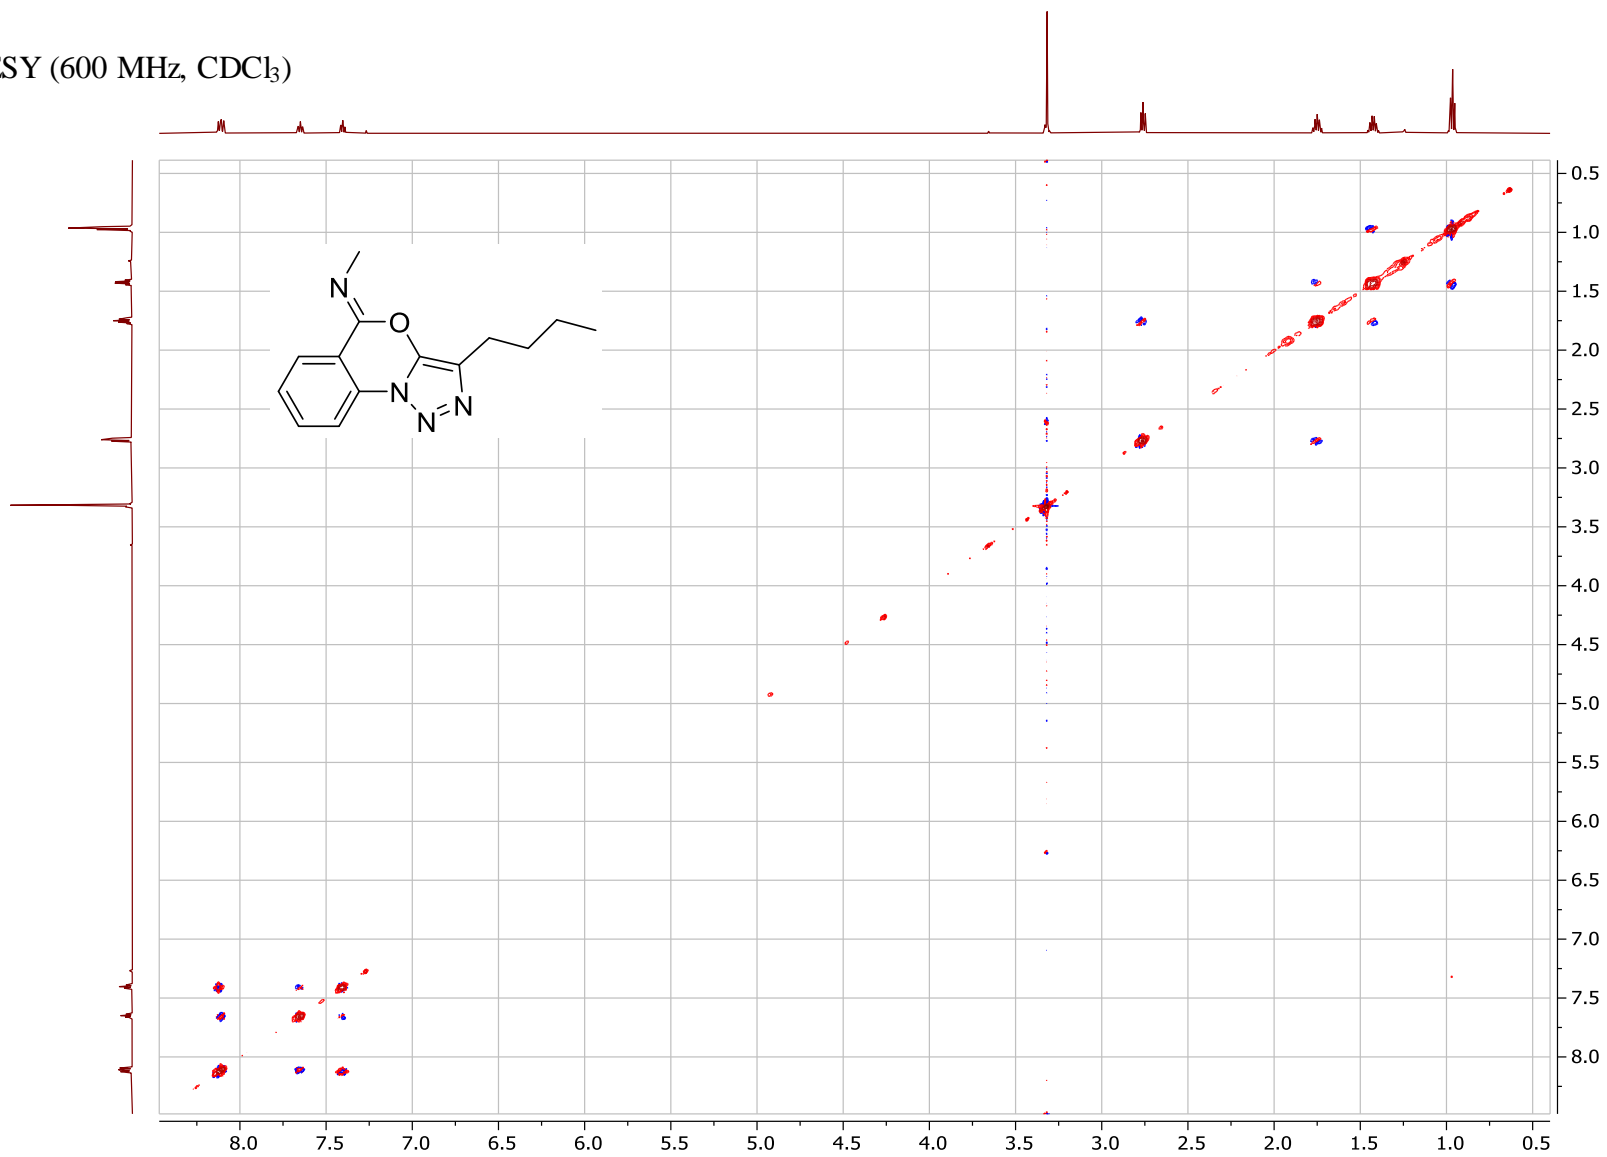

**3-Butyl-7-iodo-*N*-methyl-5*H*-[1,2,3]triazolo[1,5-*a*][3,1]benzoxazin-5-imine (3c)**

<sup>1</sup>H NMR (400 MHz, CDCl<sub>3</sub>)

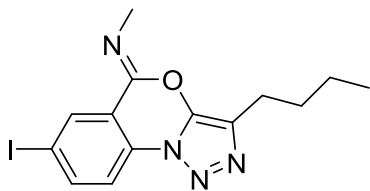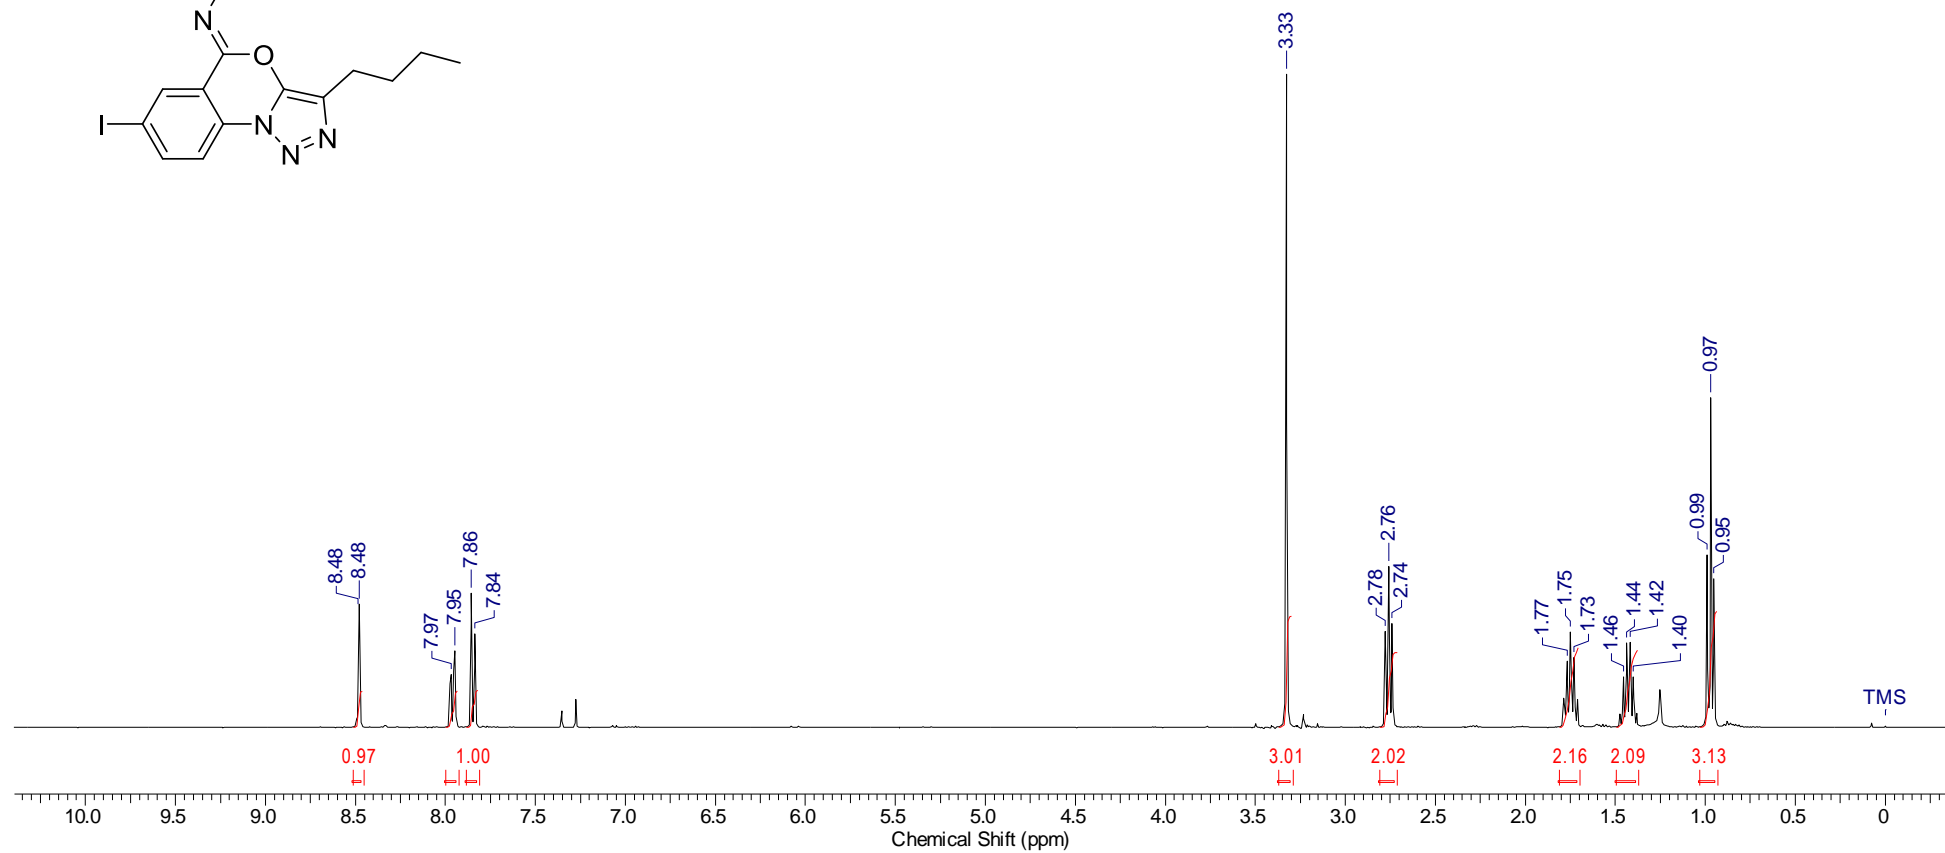

**3-Butyl-7-iodo-*N*-methyl-5*H*-[1,2,3]triazolo[1,5-*a*][3,1]benzoxazin-5-imine (3c)**

$^{13}\text{C}\{^1\text{H}\}$  NMR (100 MHz,  $\text{CDCl}_3$ )

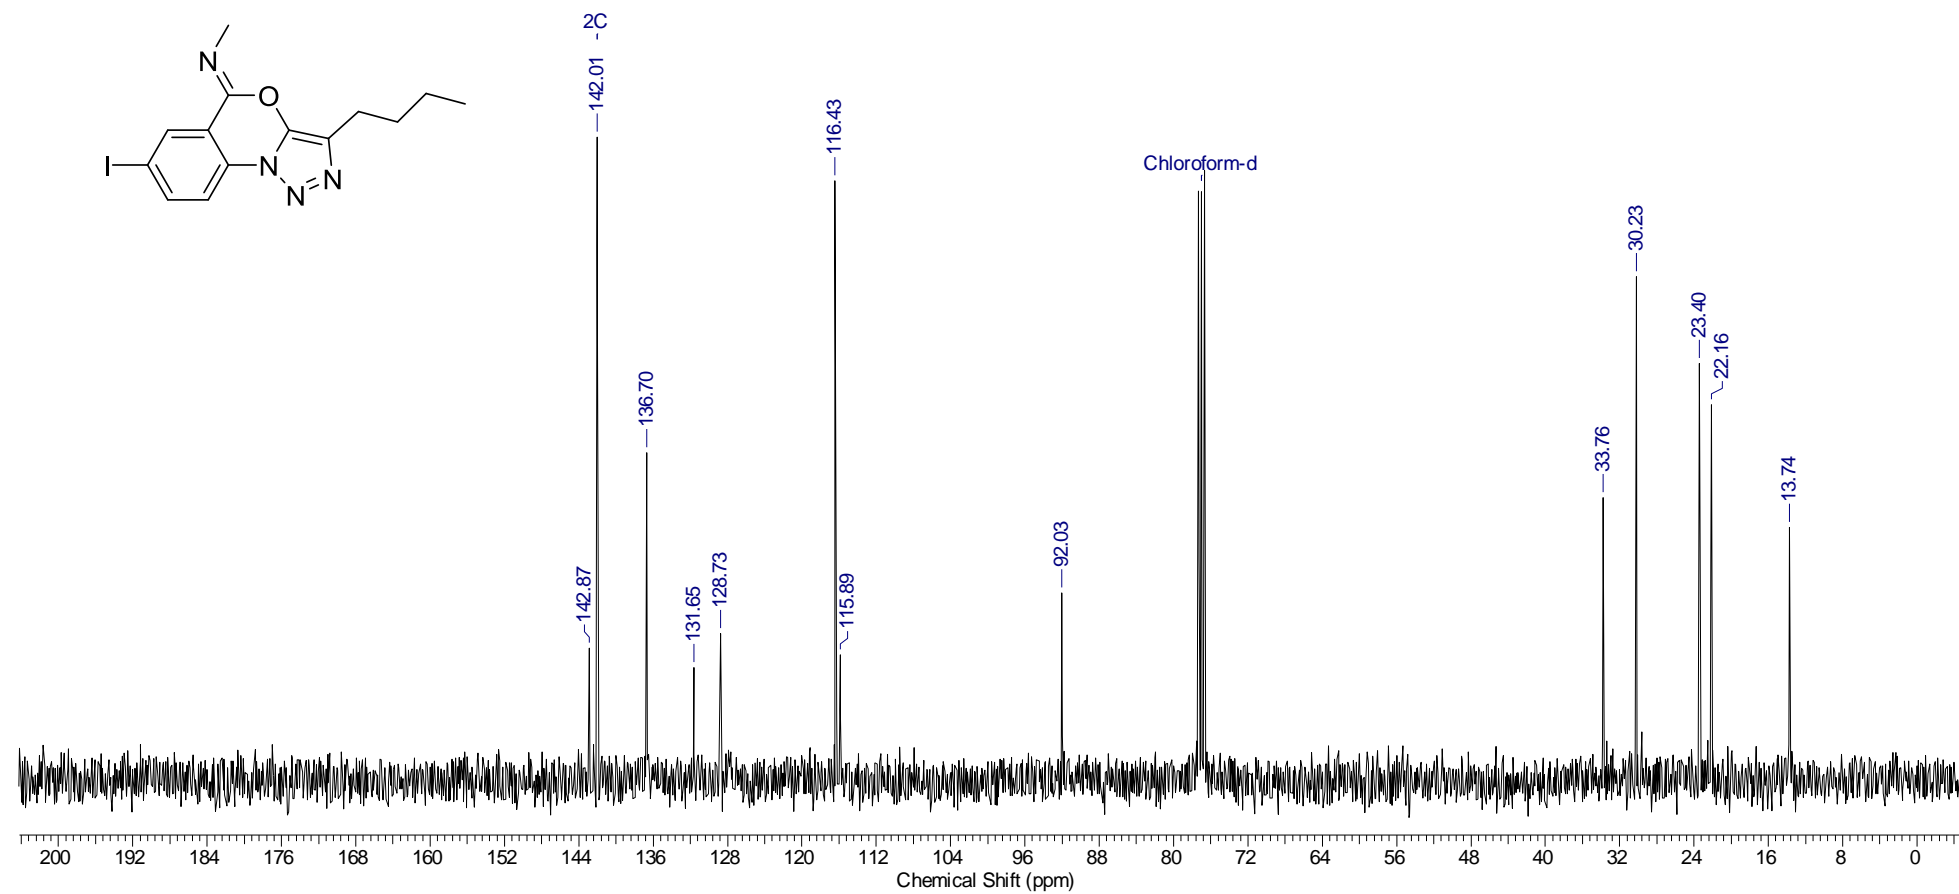

**3-Butyl-7-iodo-*N*-methyl-5*H*-[1,2,3]triazolo[1,5-*a*][3,1]benzoxazin-5-imine (3c)**

APT (100 MHz, CDCl<sub>3</sub>)

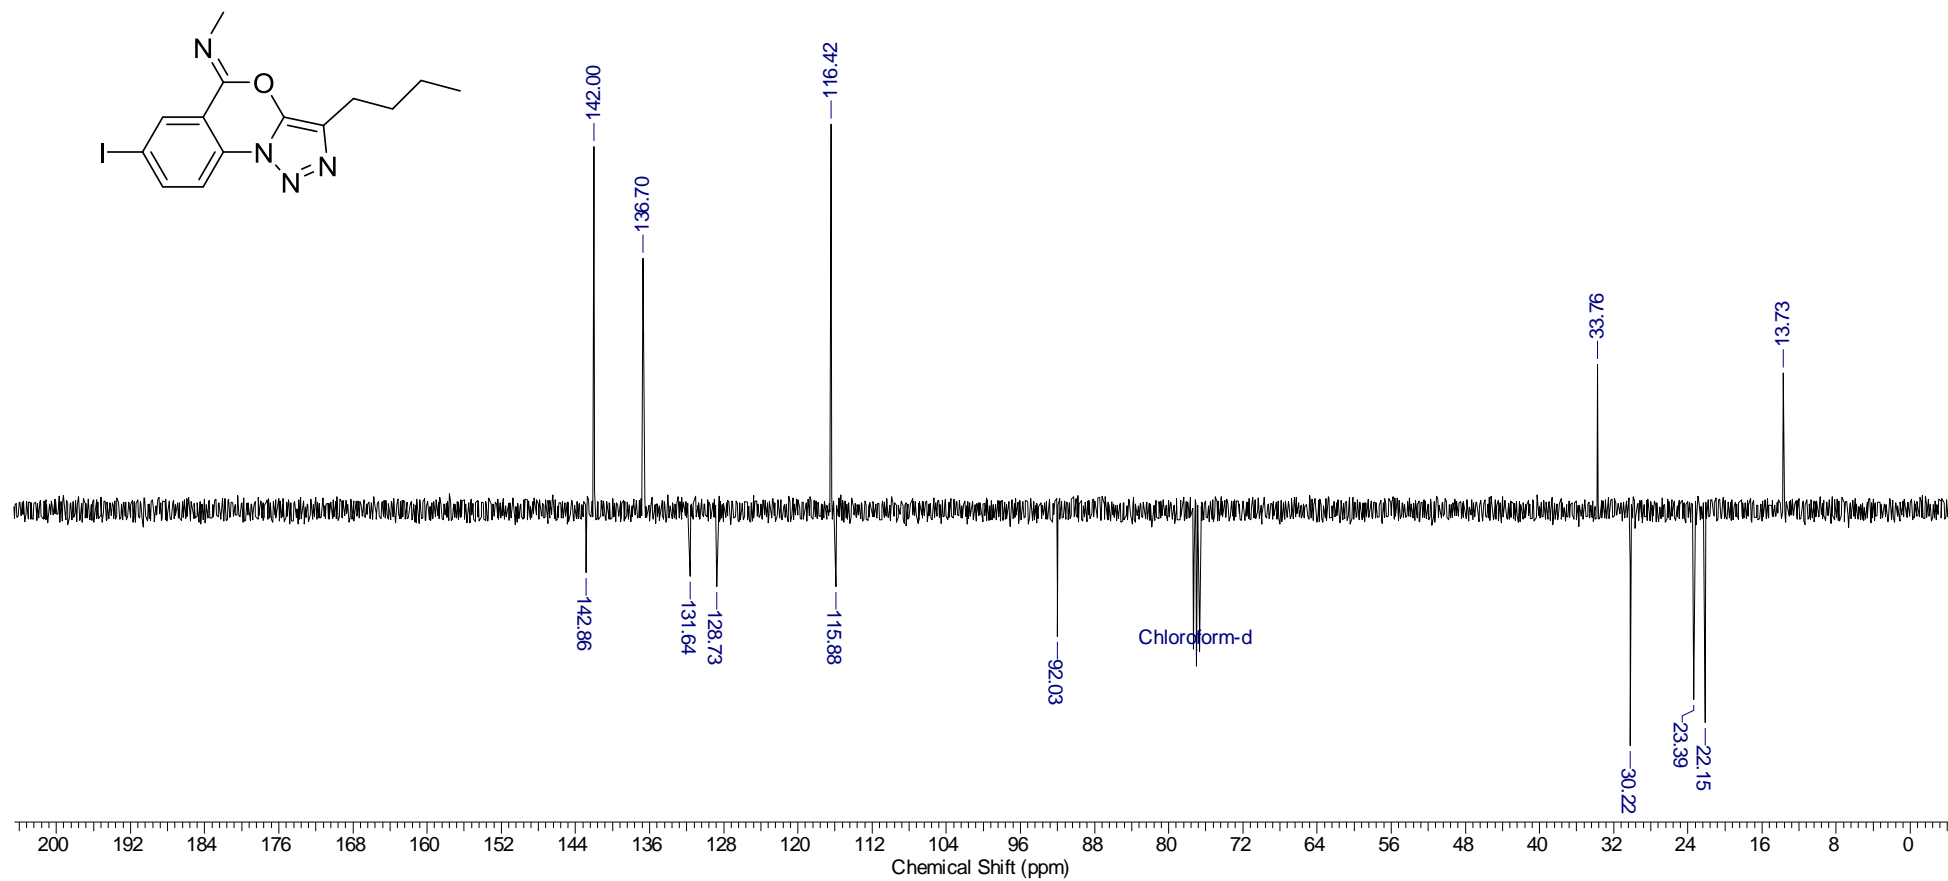

3-Butyl-8-methoxy-N-methyl-5H-[1,2,3]triazolo[1,5-a][3,1]benzoxazin-5-imine (3d)

<sup>1</sup>H NMR (400 MHz, CDCl<sub>3</sub>)

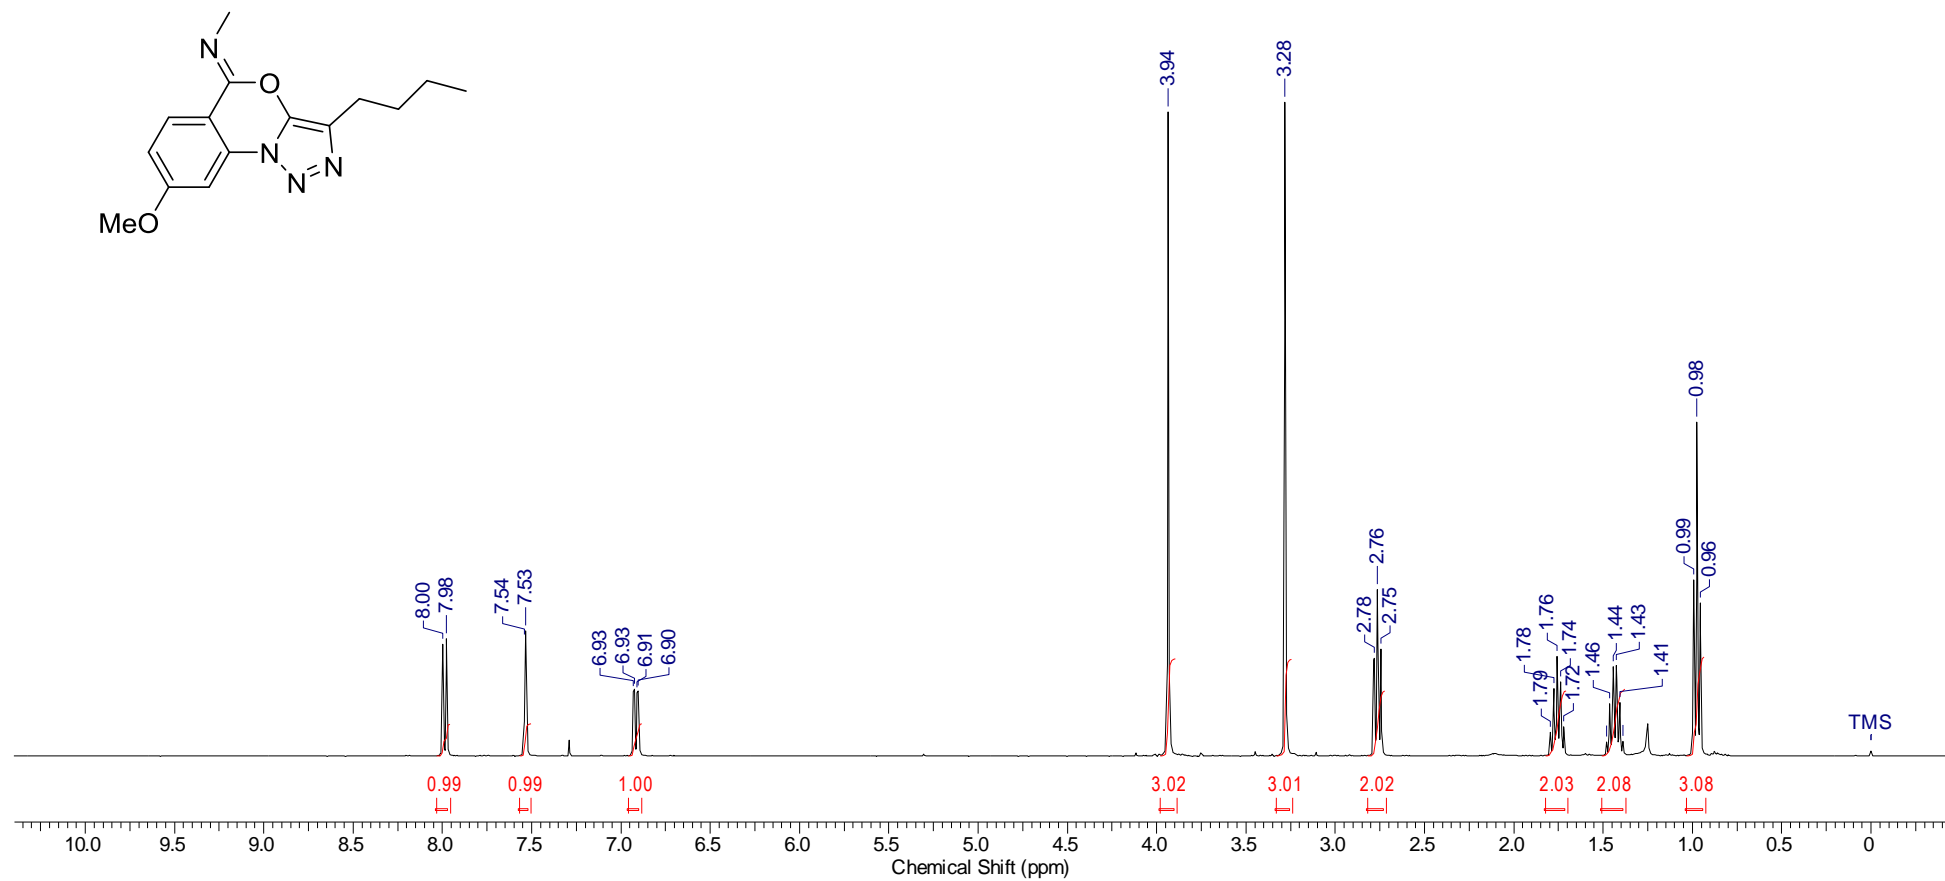



**3-Butyl-8-methoxy-*N*-methyl-5*H*-[1,2,3]triazolo[1,5-*a*][3,1]benzoxazin-5-imine (3d)**

$^{13}\text{C}\{^1\text{H}\}$  NMR (100 MHz,  $\text{CDCl}_3$ )

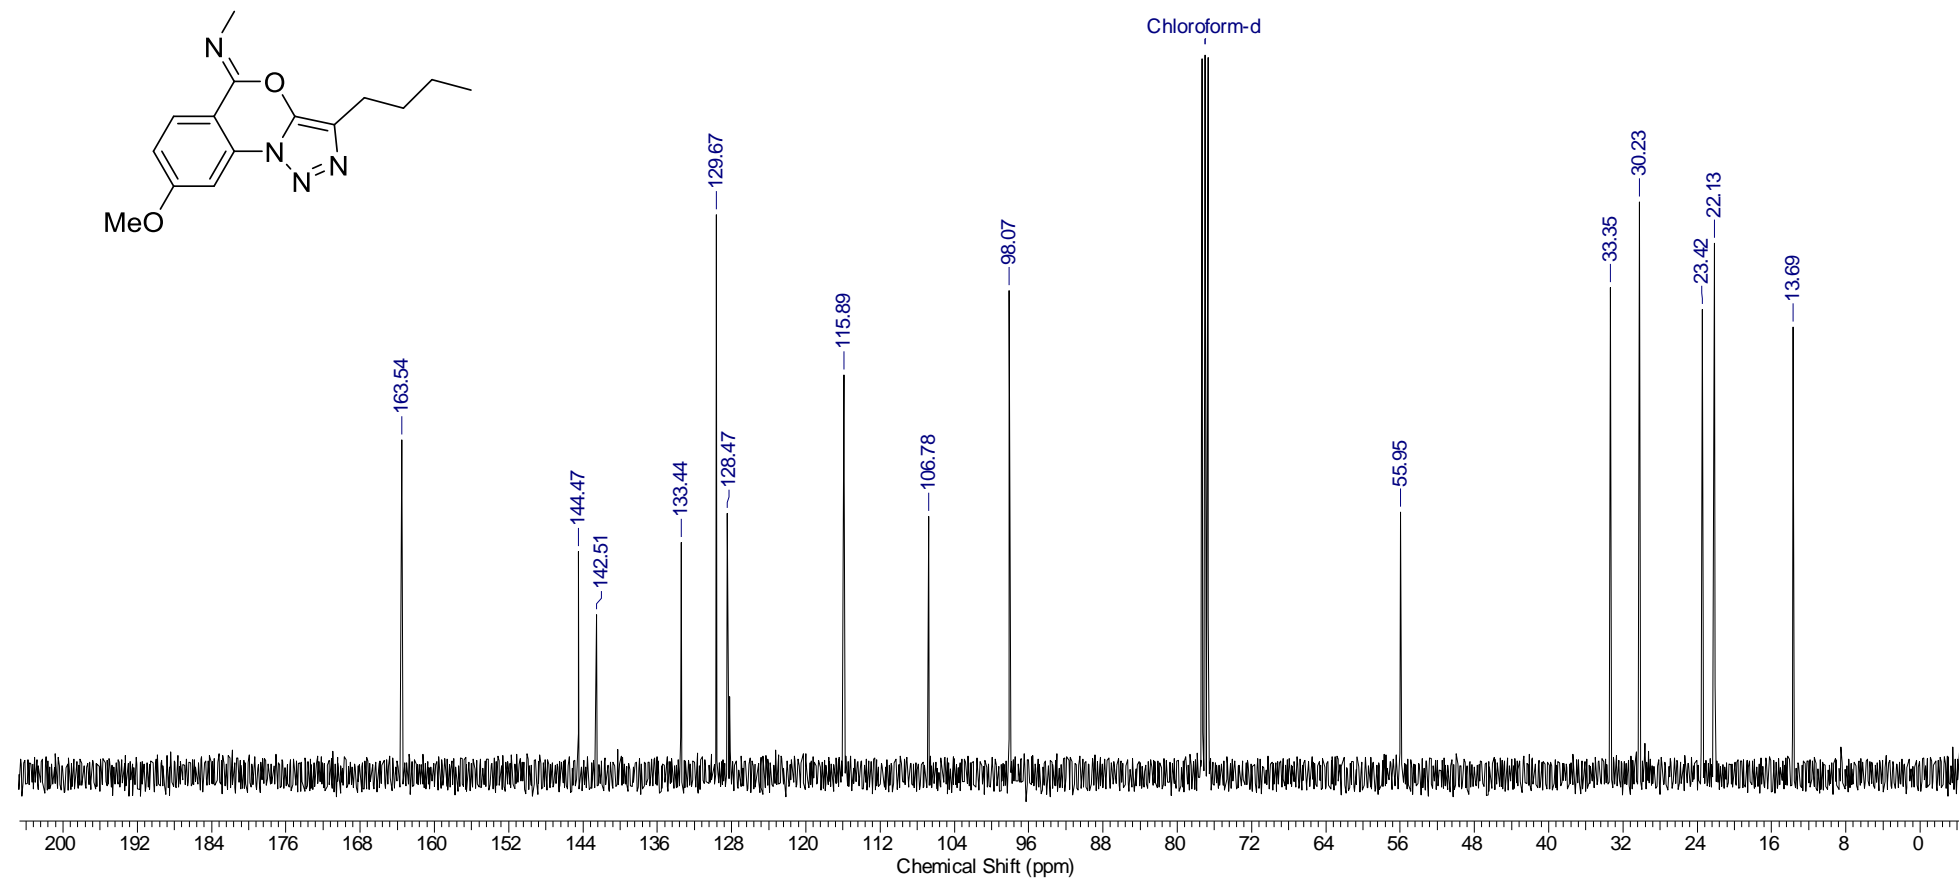

**3-*tert*-Butyl-*N*-methyl-5*H*-[1,2,3]triazolo[1,5-*a*][3,1]benzoxazin-5-imine (3g)**

<sup>1</sup>H NMR (400 MHz, CDCl<sub>3</sub>)

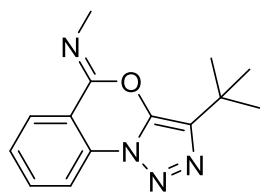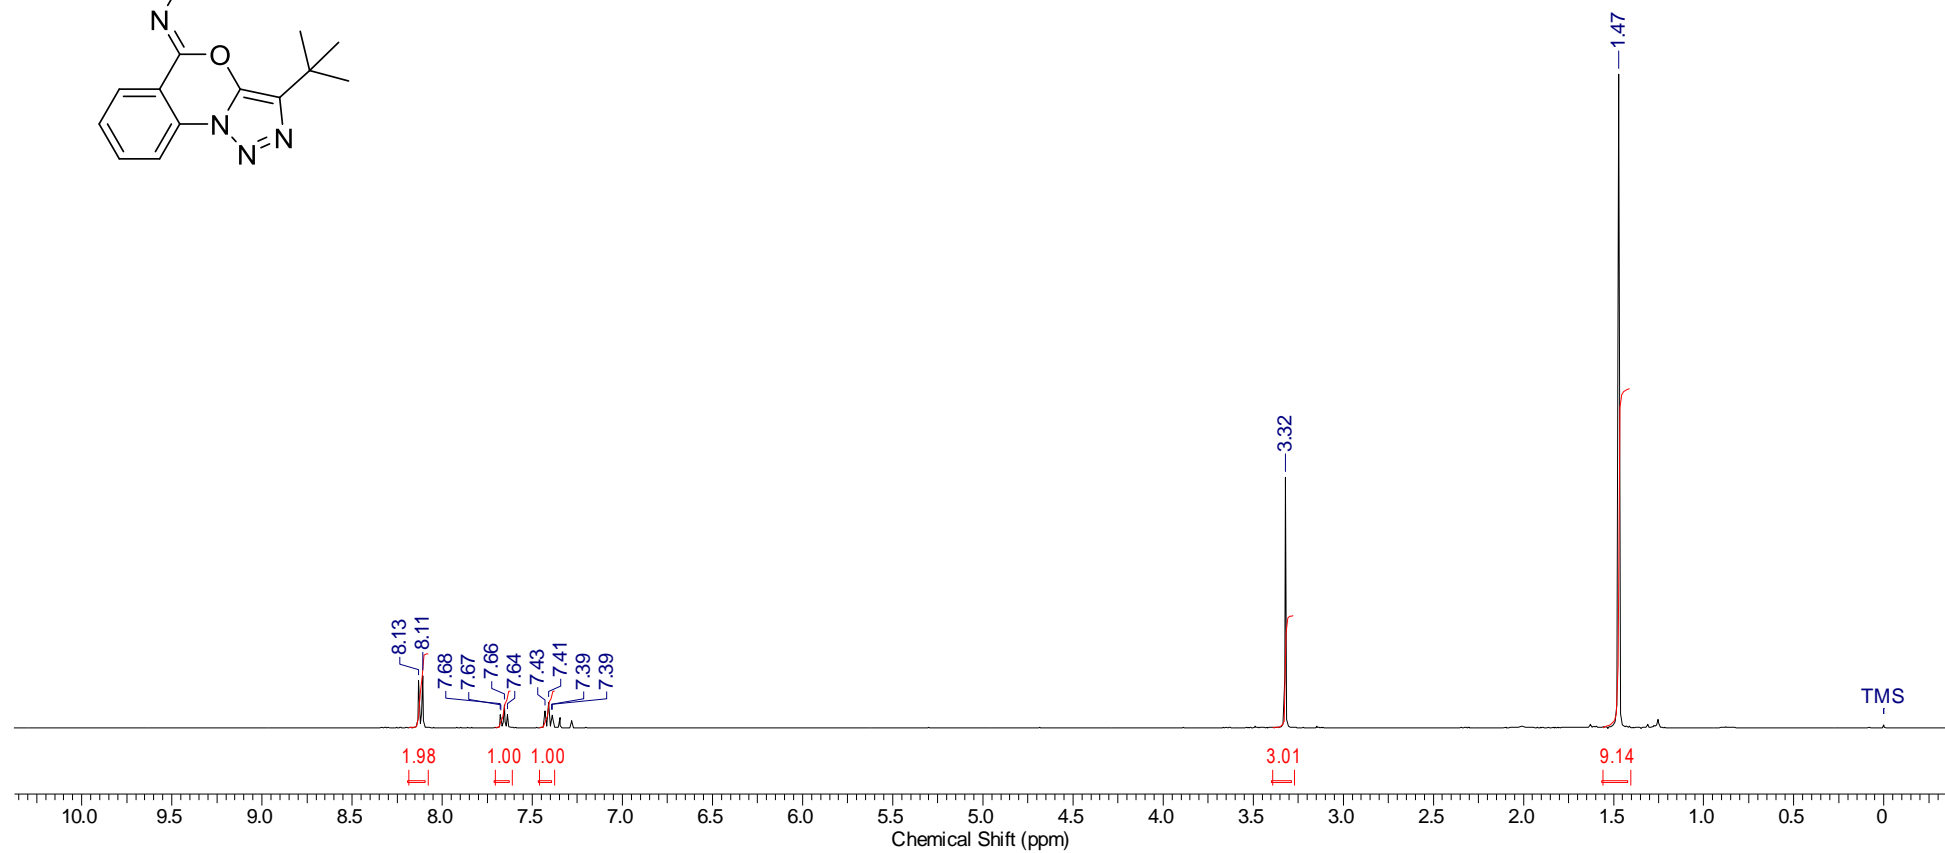

**3-*tert*-Butyl-*N*-methyl-5*H*-[1,2,3]triazolo[1,5-*a*][3,1]benzoxazin-5-imine (3g)**

$^{13}\text{C}\{^1\text{H}\}$  NMR (100 MHz,  $\text{CDCl}_3$ )

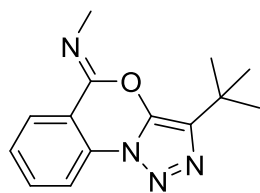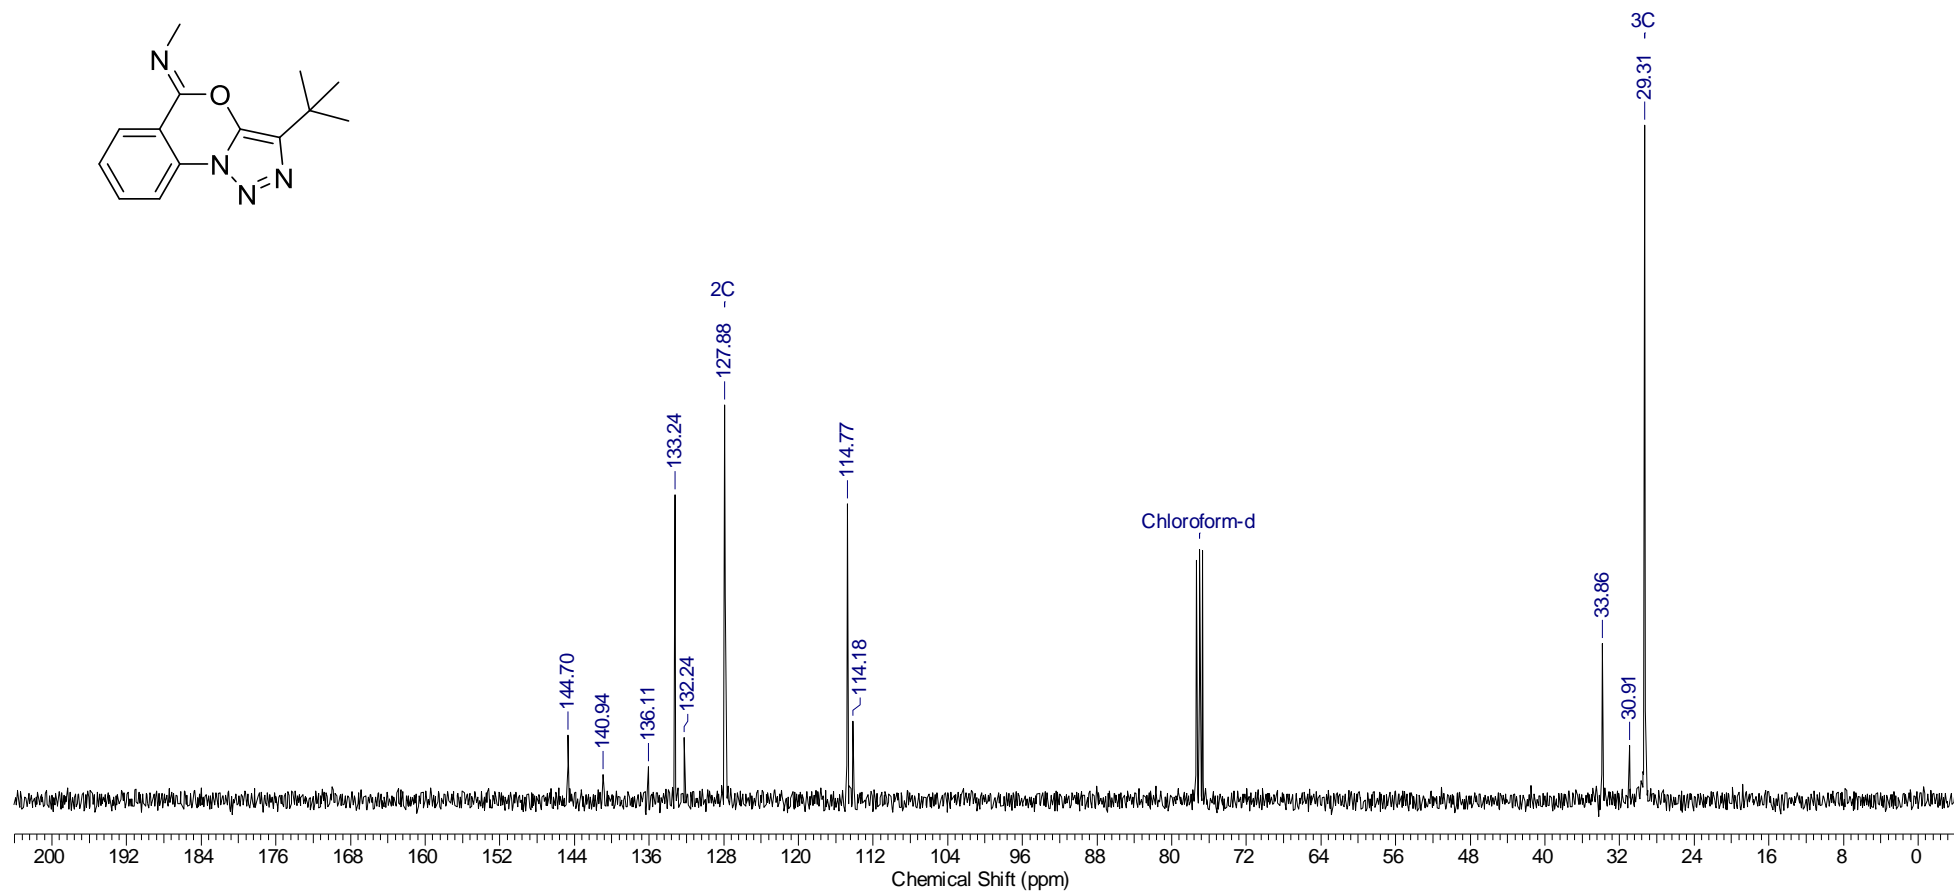

***N*-Methyl-3-phenyl-5*H*-[1,2,3]triazolo[1,5-*a*][3,1]benzoxazin-5-imine (3h)**

<sup>1</sup>H NMR (400 MHz, CDCl<sub>3</sub>)

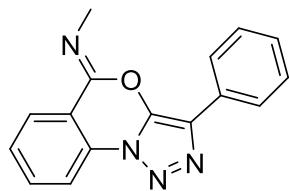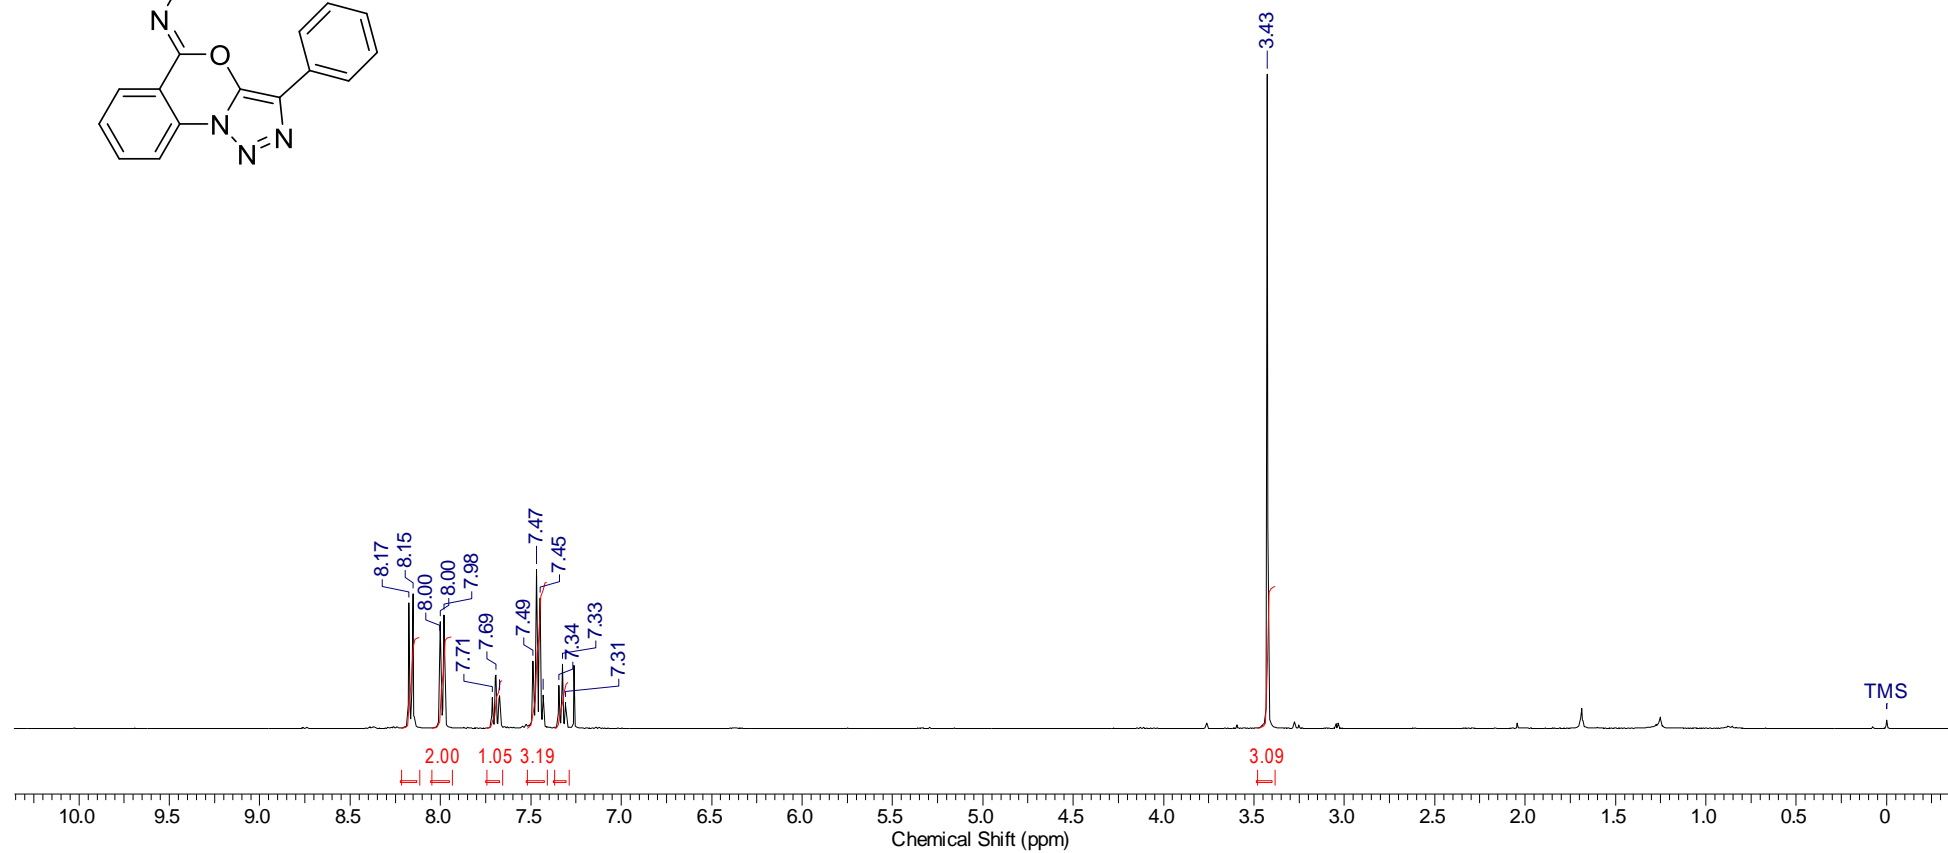

***N*-Methyl-3-phenyl-5*H*-[1,2,3]triazolo[1,5-*a*][3,1]benzoxazin-5-imine (3h)**

$^{13}\text{C}\{^1\text{H}\}$  NMR (100 MHz,  $\text{CDCl}_3$ )

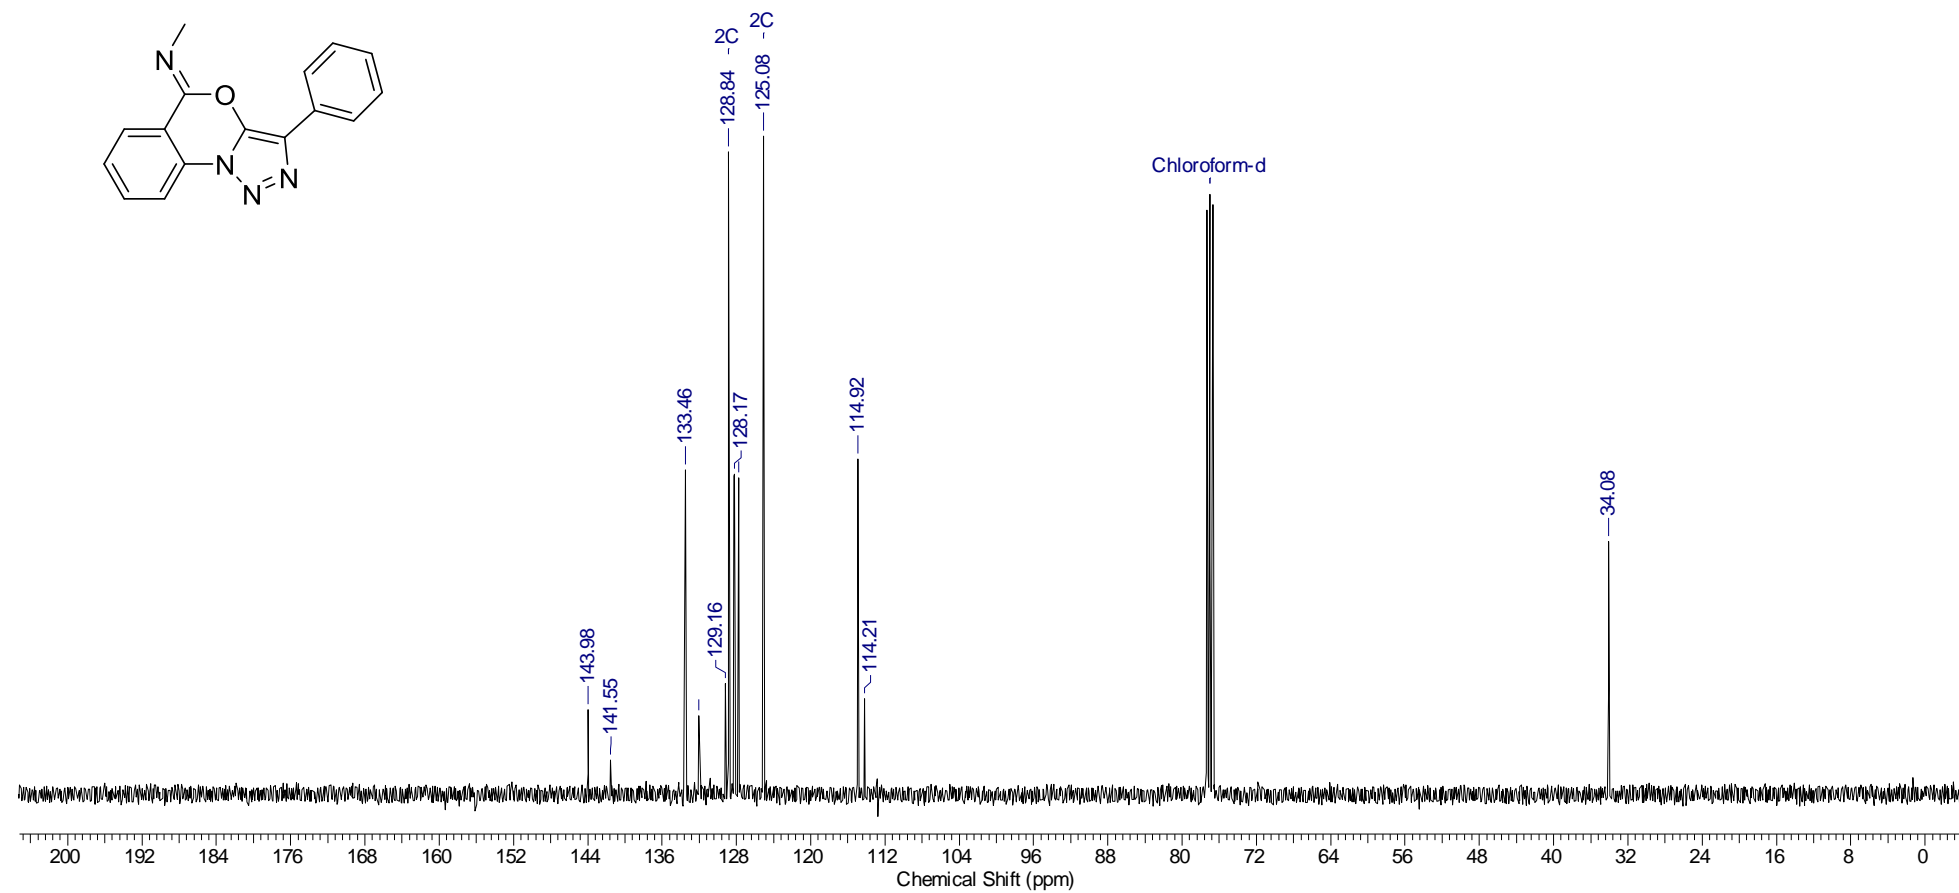

3-(4-*tert*-Butylphenyl)-*N*-methyl-5*H*-[1,2,3]triazolo[1,5-*a*][3,1]benzoxazin-5-imine (31)

<sup>1</sup>H NMR (400 MHz, CDCl<sub>3</sub>)

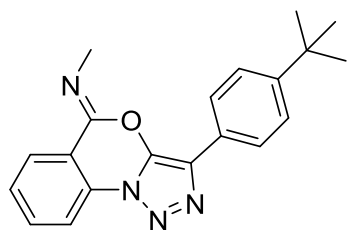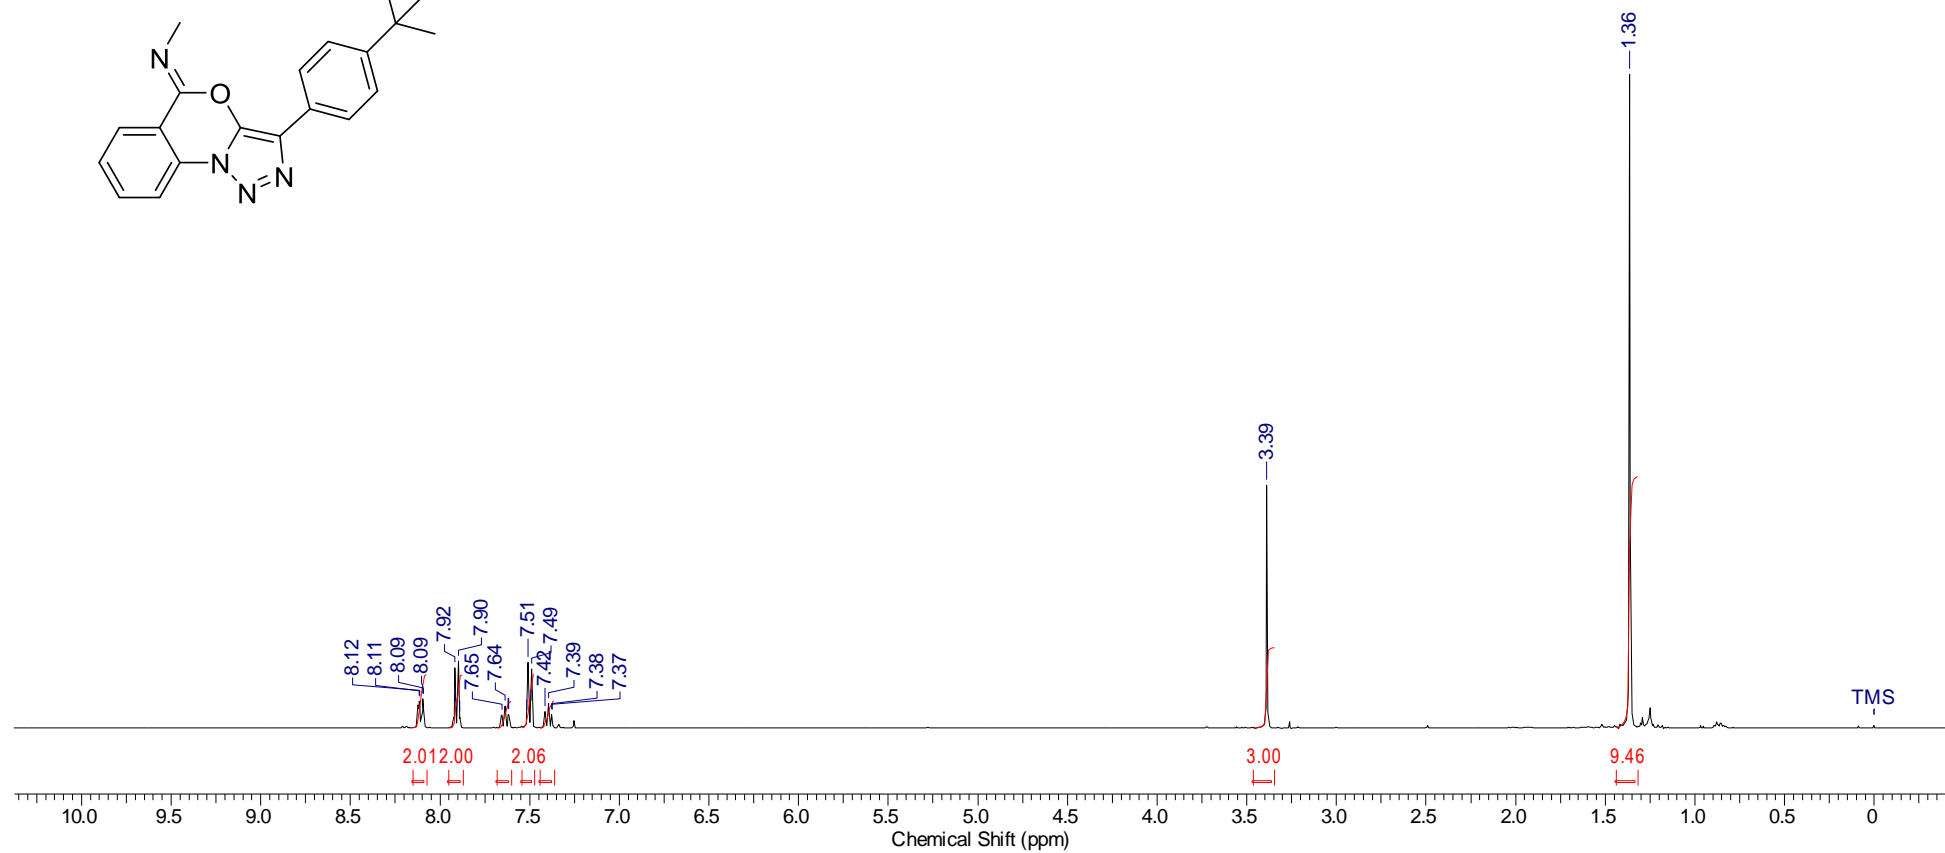

**3-(4-*tert*-Butylphenyl)-*N*-methyl-5*H*-[1,2,3]triazolo[1,5-*a*][3,1]benzoxazin-5-imine (31)**

$^{13}\text{C}\{^1\text{H}\}$  NMR (100 MHz,  $\text{CDCl}_3$ )

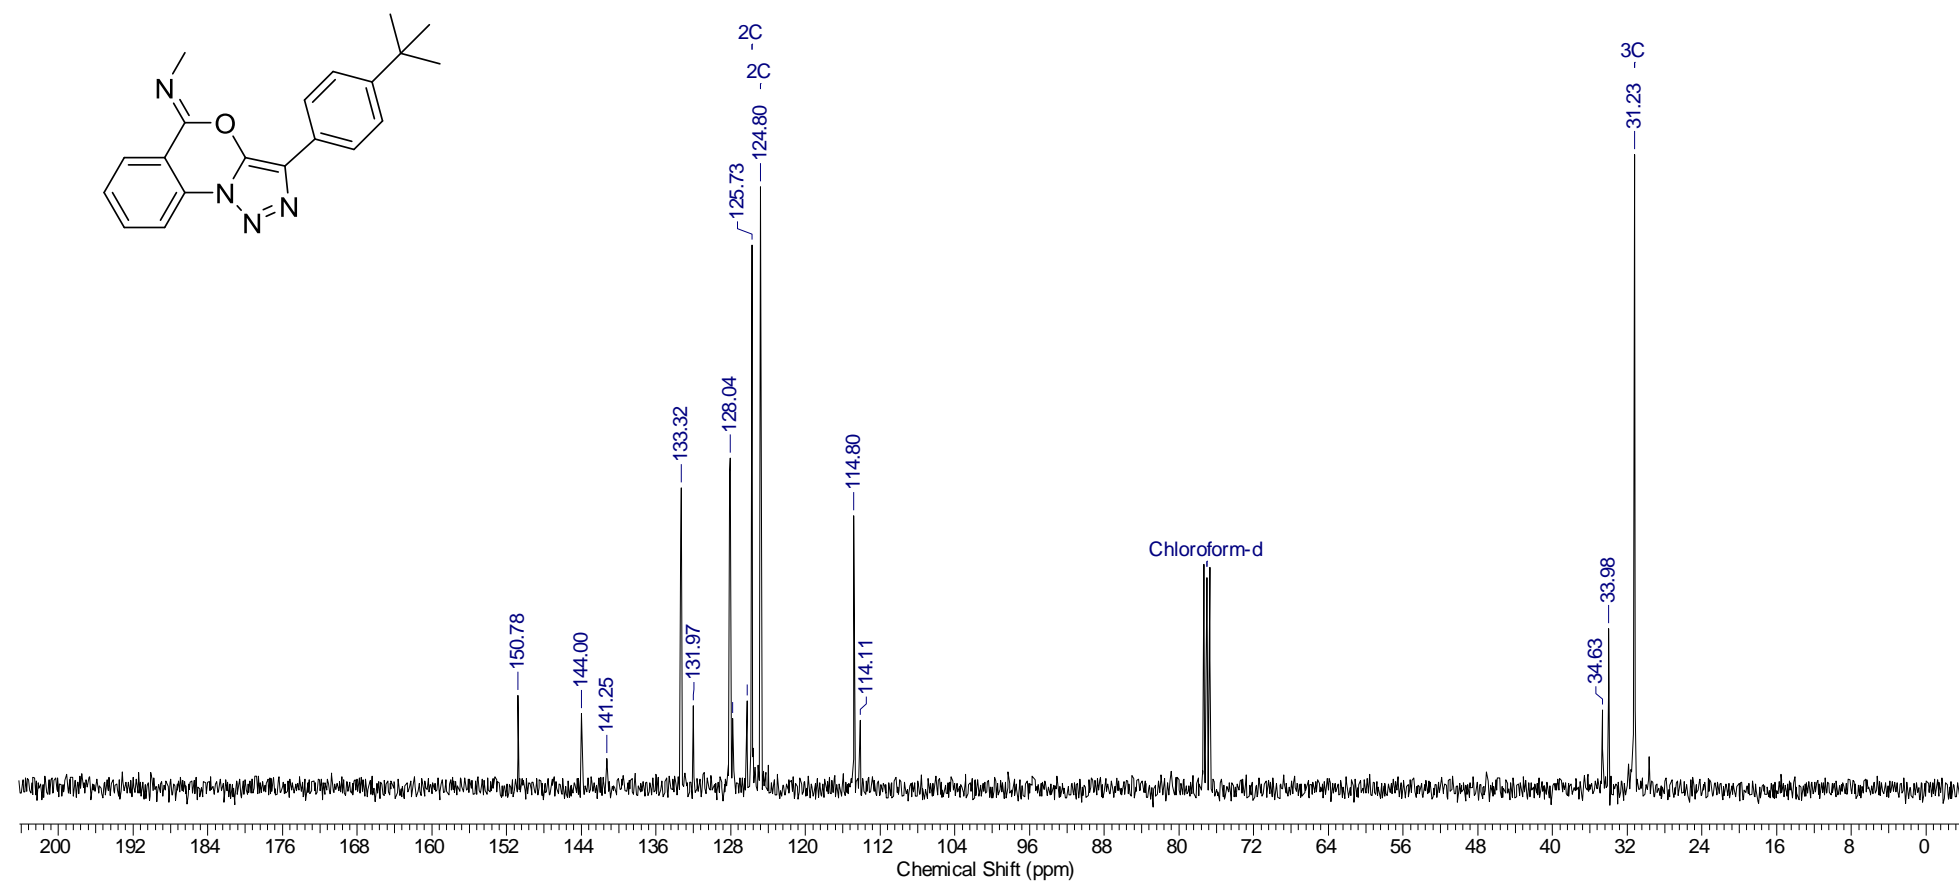

3-(4-Methoxyphenyl)-*N*-methyl-5*H*-[1,2,3]triazolo[1,5-*a*][3,1]benzoxazin-5-imine (3m)

<sup>1</sup>H NMR (400 MHz, CDCl<sub>3</sub>)

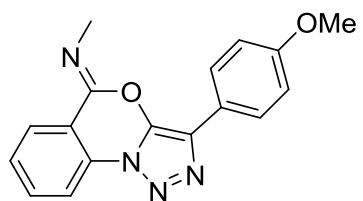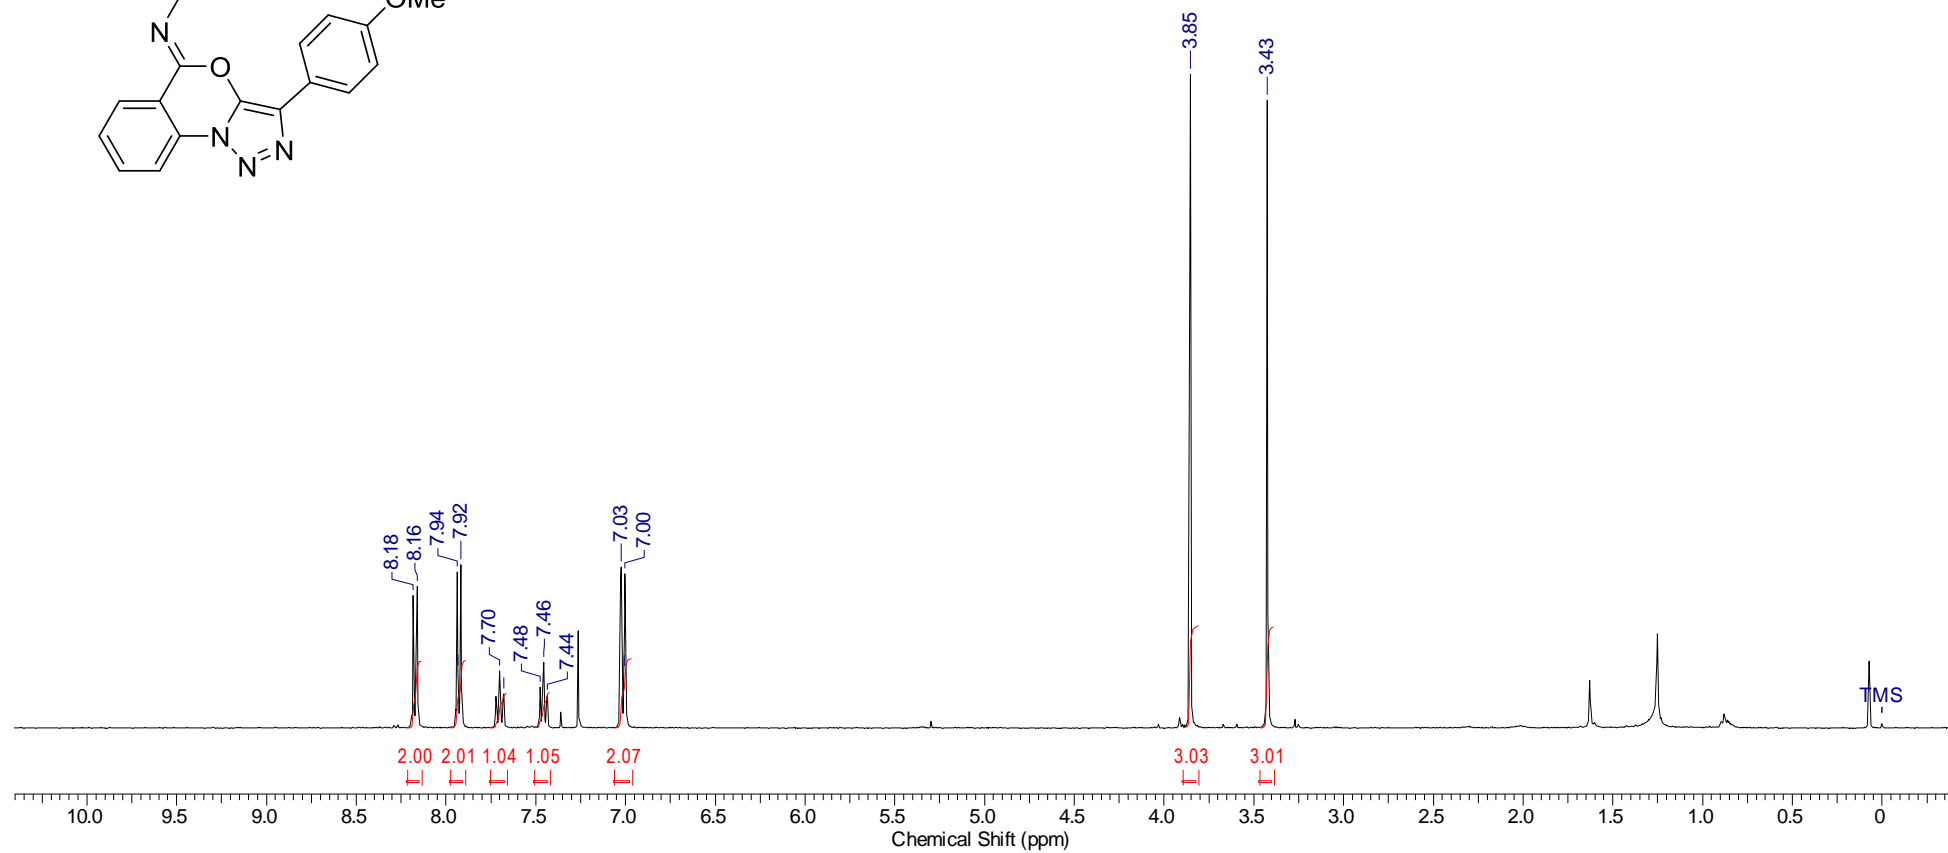



**3-(4-Methoxyphenyl)-*N*-methyl-5*H*-[1,2,3]triazolo[1,5-*a*][3,1]benzoxazin-5-imine (3m)**

$^{13}\text{C}\{^1\text{H}\}$  NMR (100 MHz,  $\text{CDCl}_3$ )

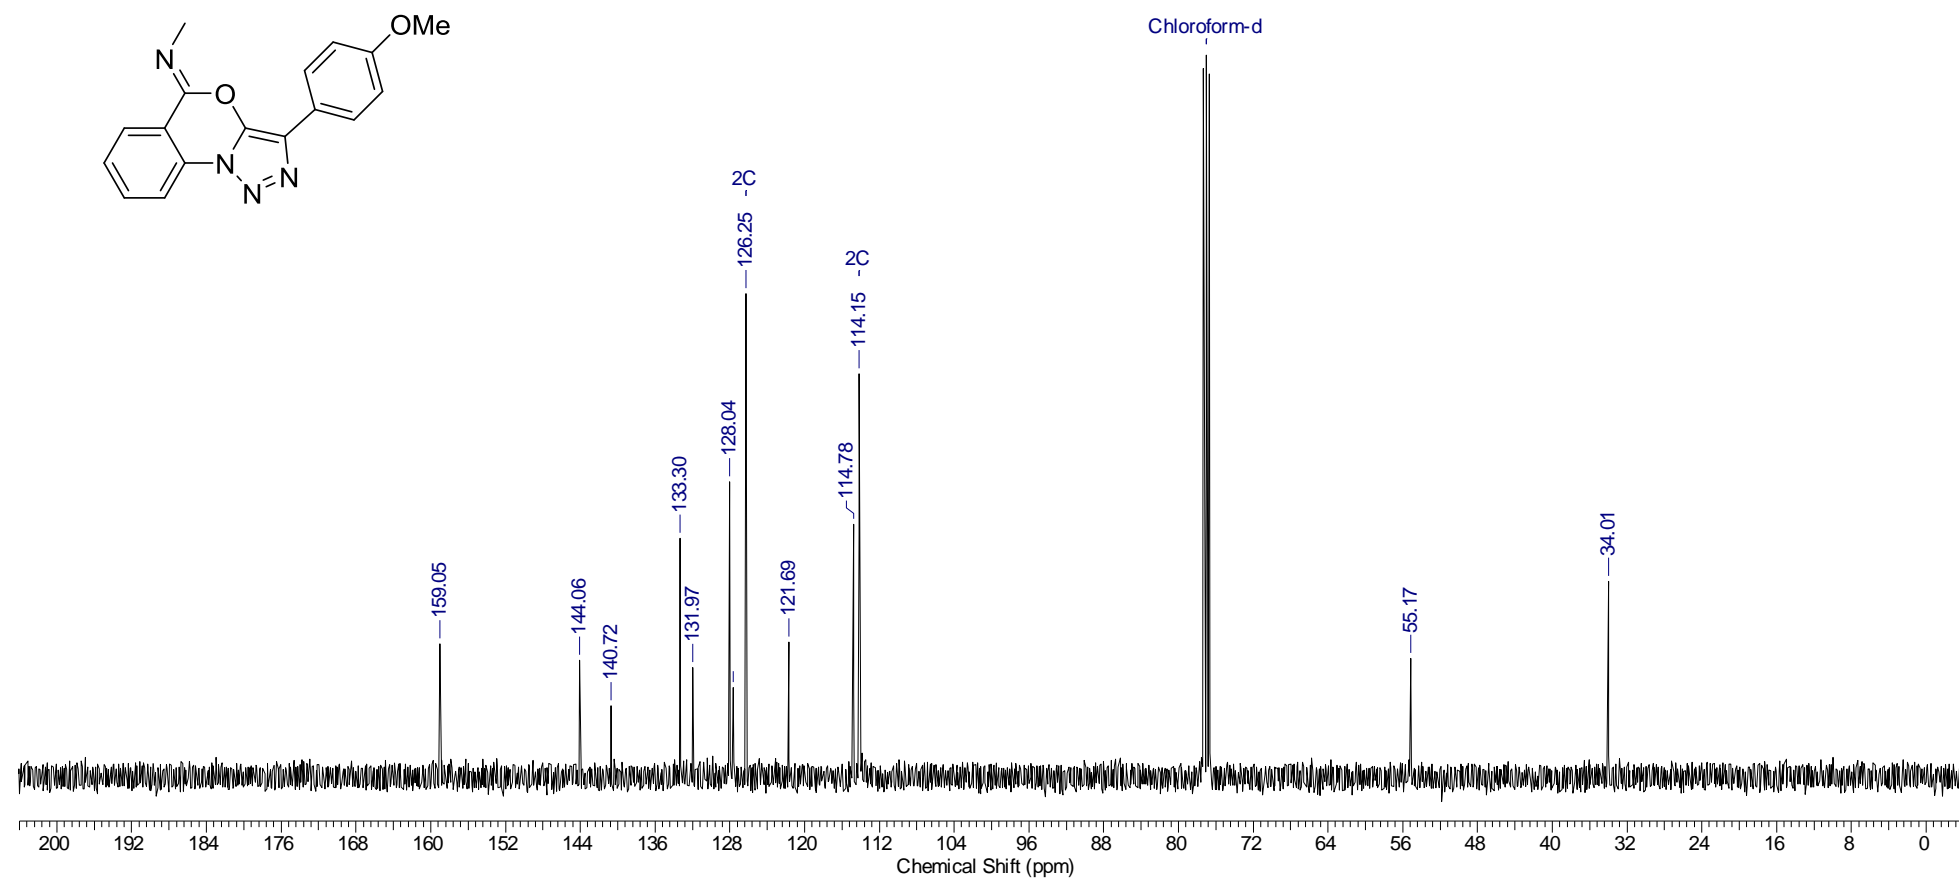

Methyl 3-[5-(methylimino)-5H-[1,2,3]triazolo[1,5-a][3,1]benzoxazin-3-yl]benzoate (3n)

<sup>1</sup>H NMR (400 MHz, CDCl<sub>3</sub>)

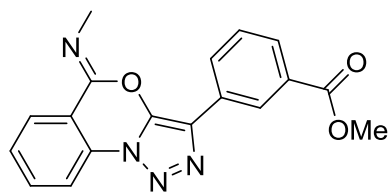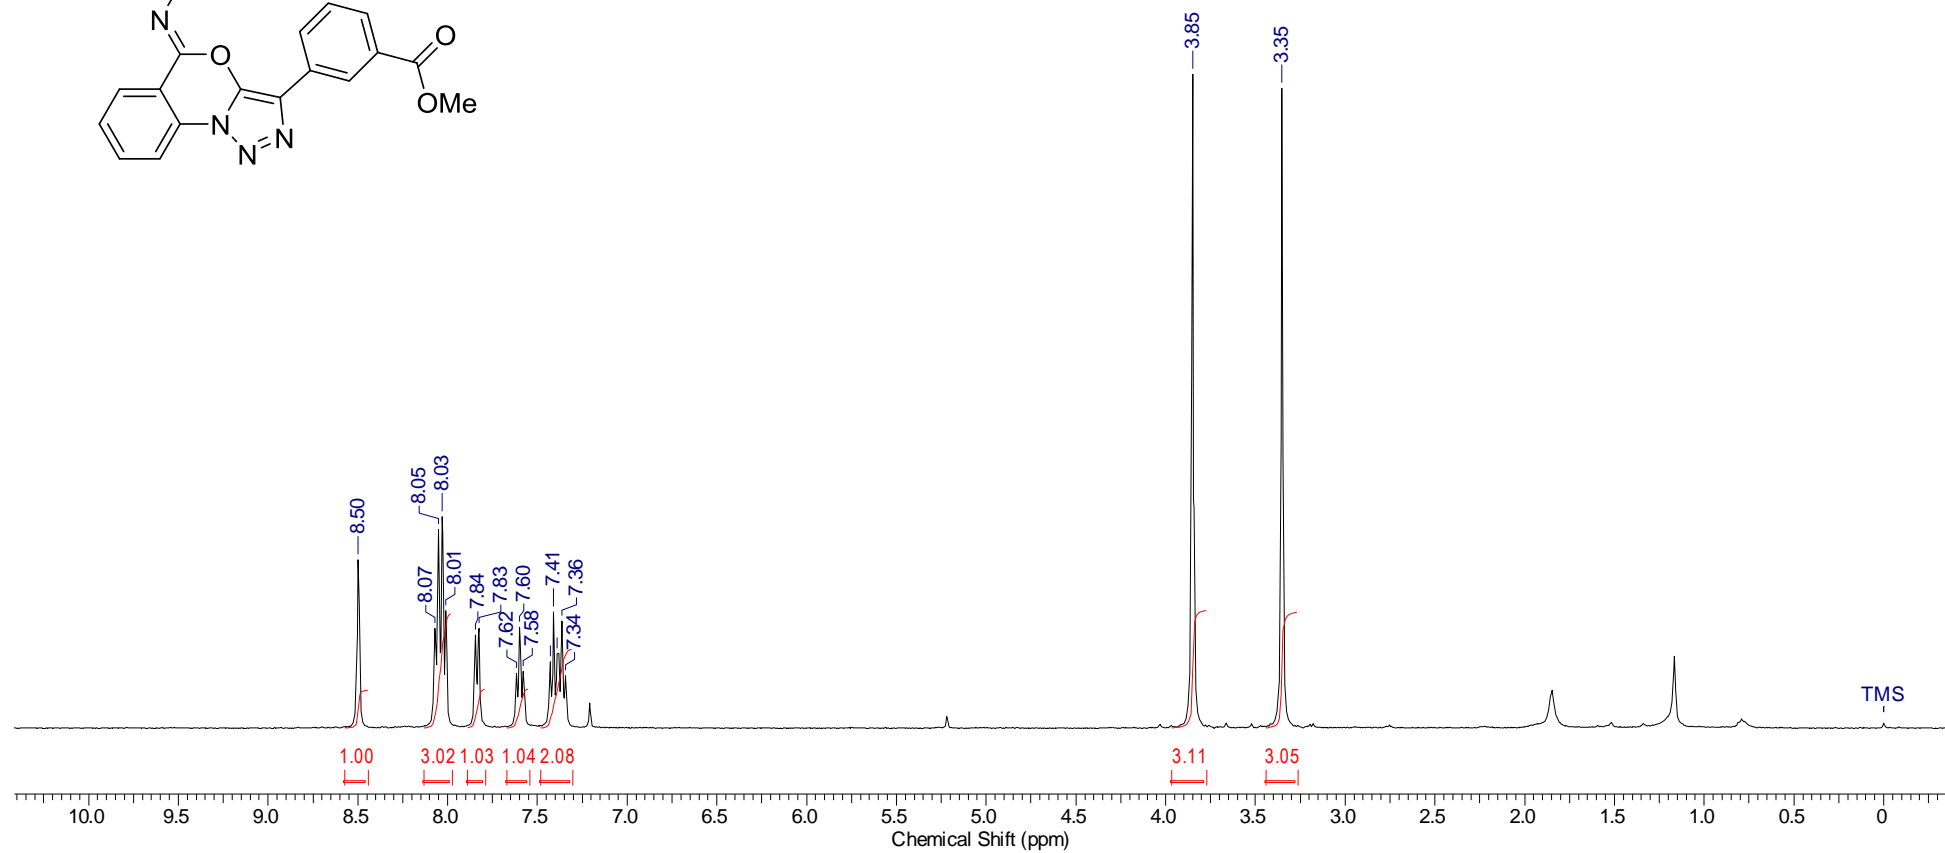

Methyl 3-[5-(methylimino)-5H-[1,2,3]triazolo[1,5-a][3,1]benzoxazin-3-yl]benzoate (3n)

$^{13}\text{C}\{^1\text{H}\}$  NMR (100 MHz,  $\text{CDCl}_3$ )

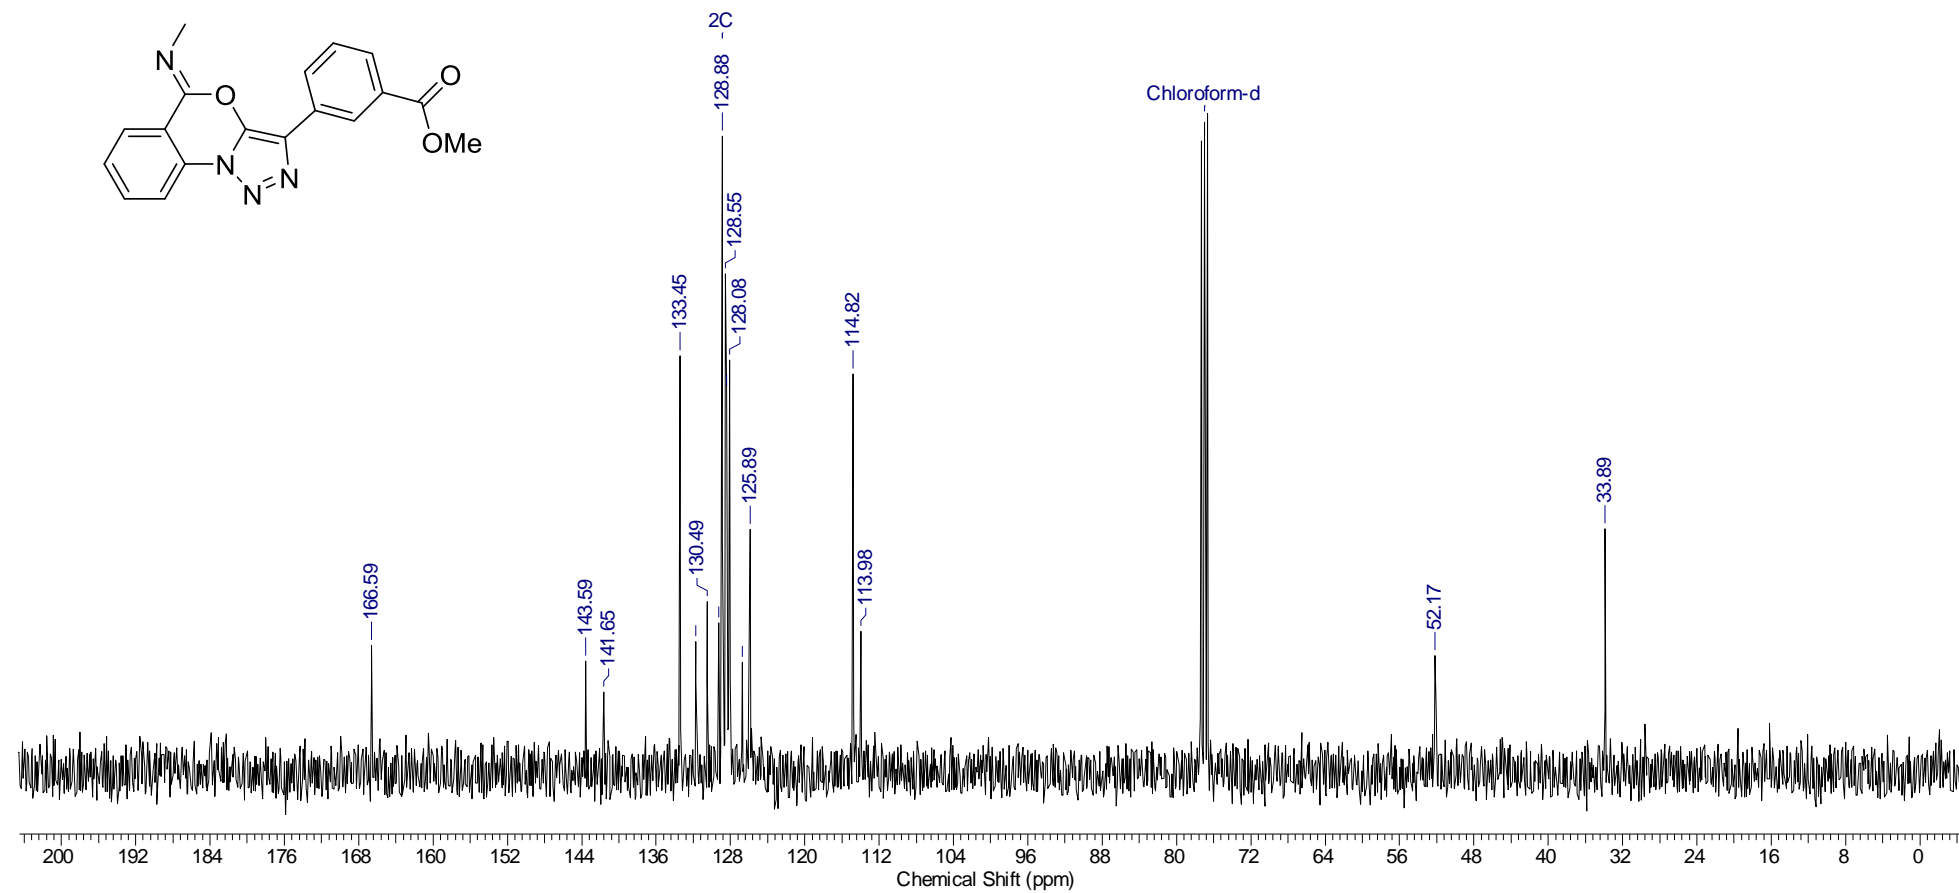

3-(4-Acetylphenyl)-*N*-methyl-5*H*-[1,2,3]triazolo[1,5-*a*][3,1]benzoxazin-5-imine (3o)

<sup>1</sup>H NMR (400 MHz, CDCl<sub>3</sub>)

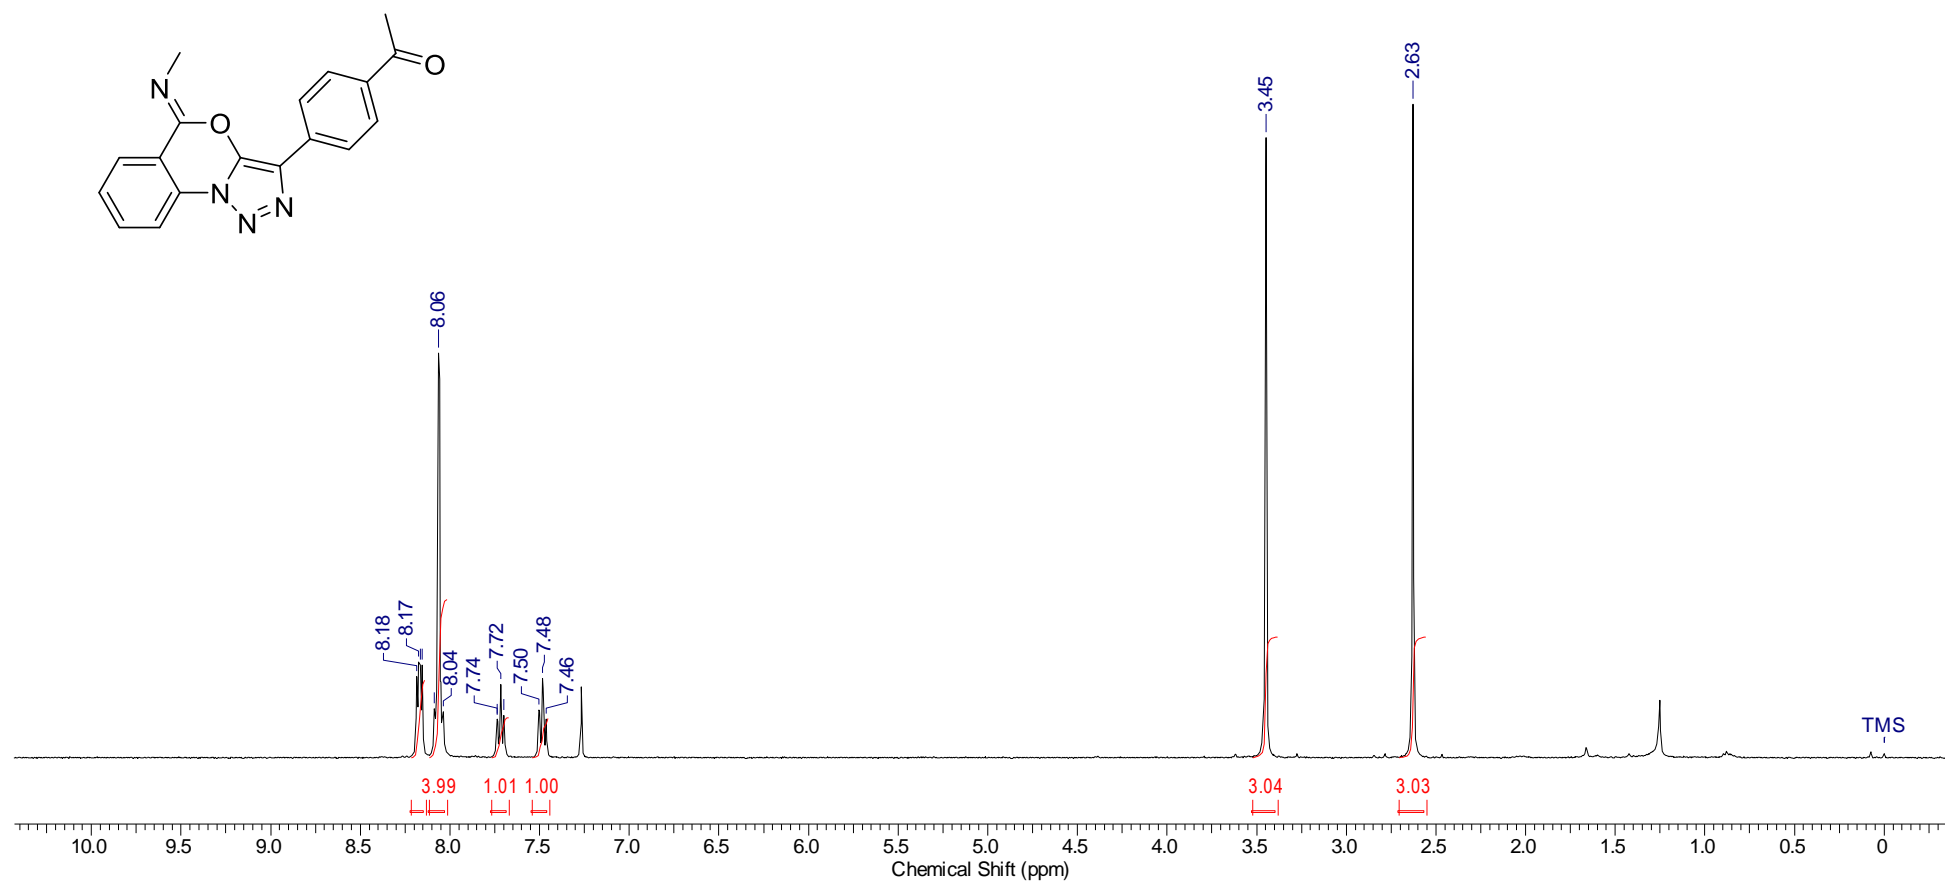

**3-(4-Acetylphenyl)-*N*-methyl-5*H*-[1,2,3]triazolo[1,5-*a*][3,1]benzoxazin-5-imine (3o)**

$^{13}\text{C}\{^1\text{H}\}$  NMR (100 MHz,  $\text{CDCl}_3$ )

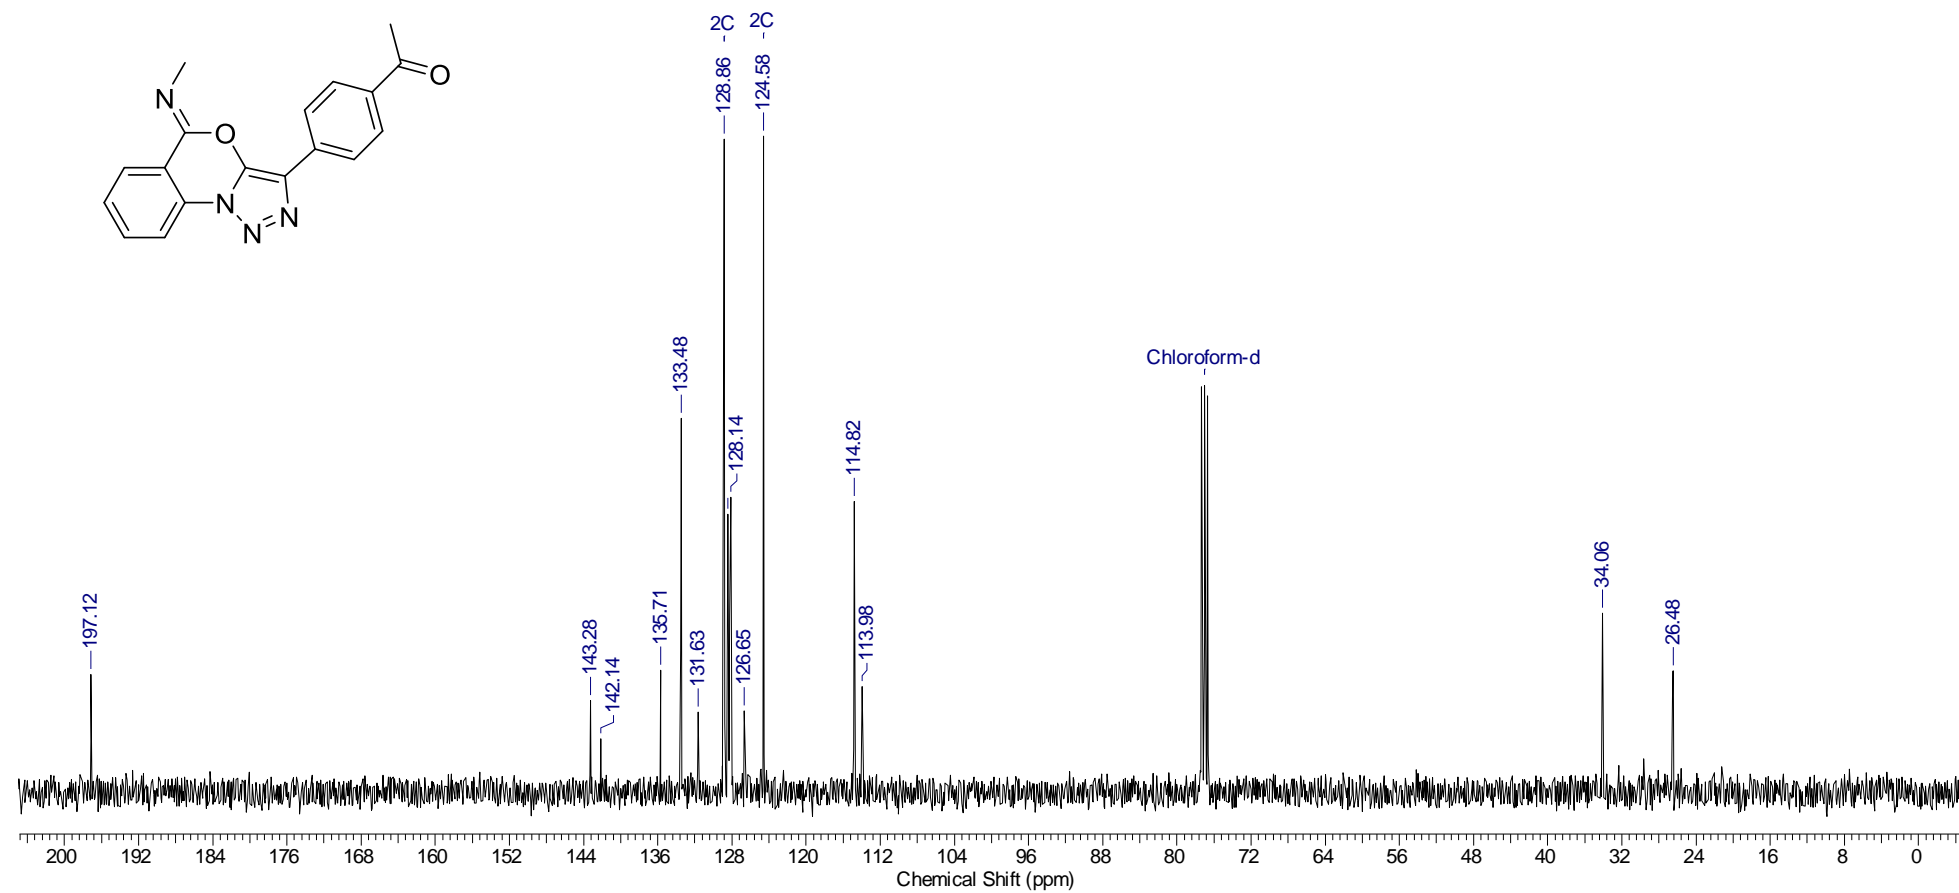

**3-Butyl-N-(4-methylphenyl)-5H-[1,2,3]triazolo[1,5-a][3,1]benzoxazin-5-imine (3q)**

<sup>1</sup>H NMR (400 MHz, CDCl<sub>3</sub>)

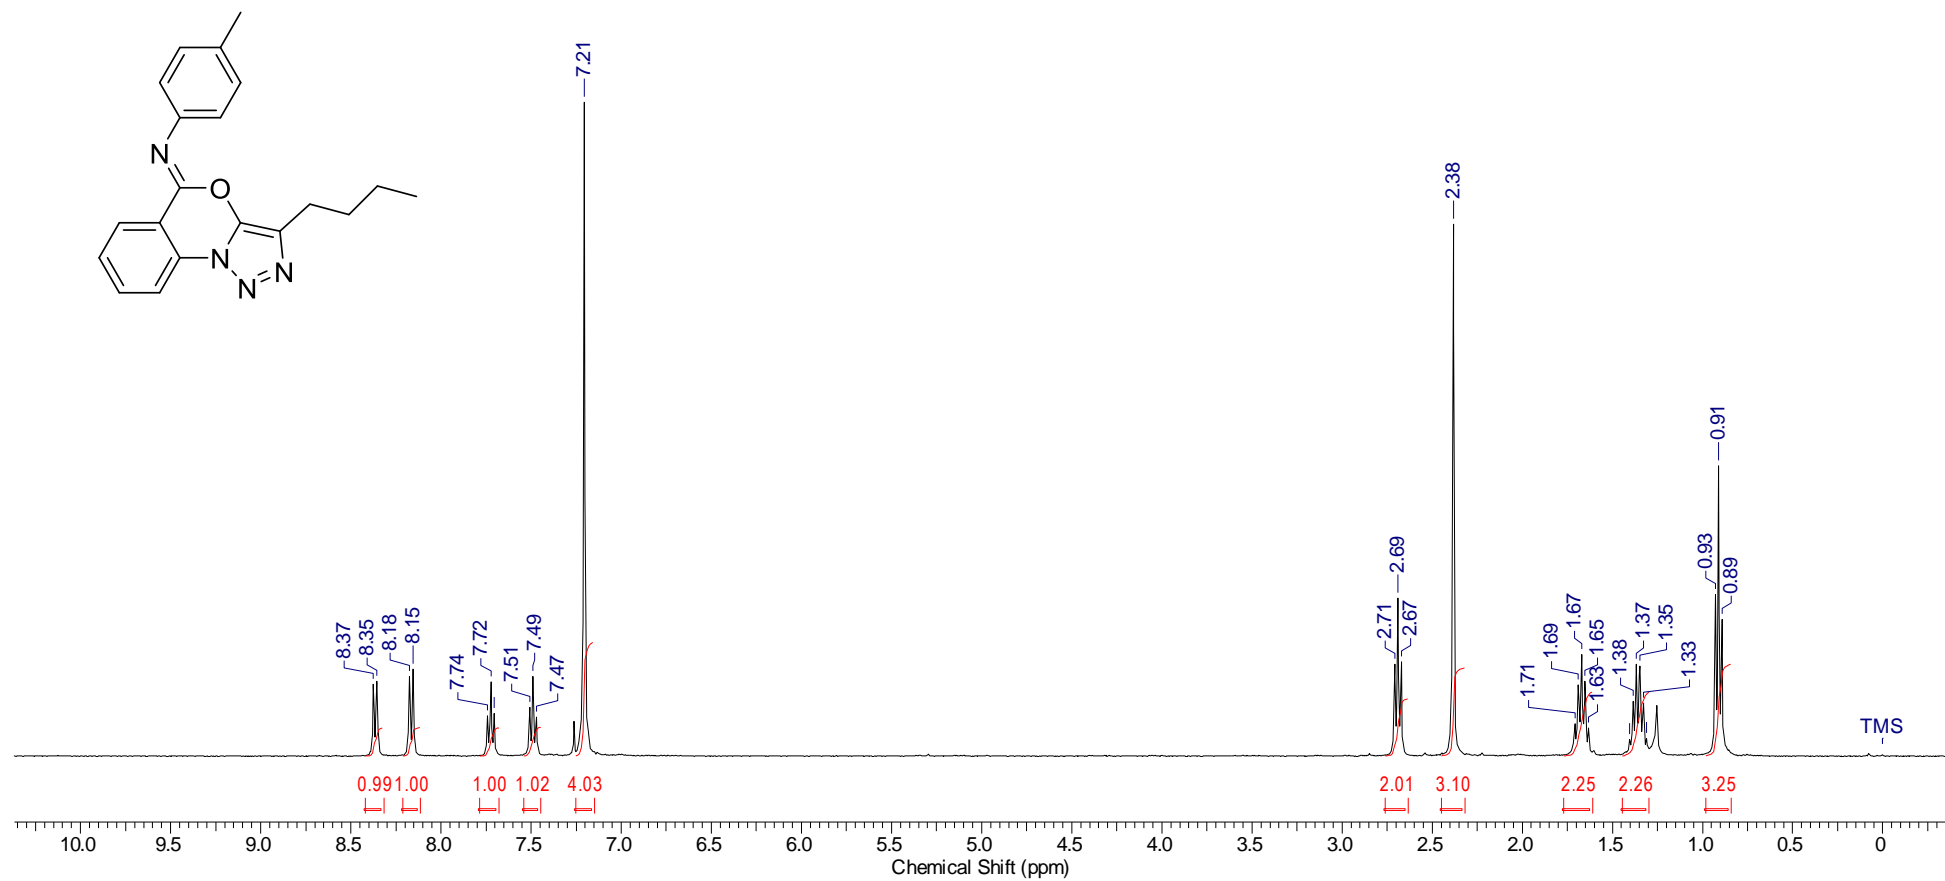

**3-Butyl-N-(4-methylphenyl)-5H-[1,2,3]triazolo[1,5-a][3,1]benzoxazin-5-imine (3q)**

$^{13}\text{C}\{^1\text{H}\}$  NMR (100 MHz,  $\text{CDCl}_3$ )

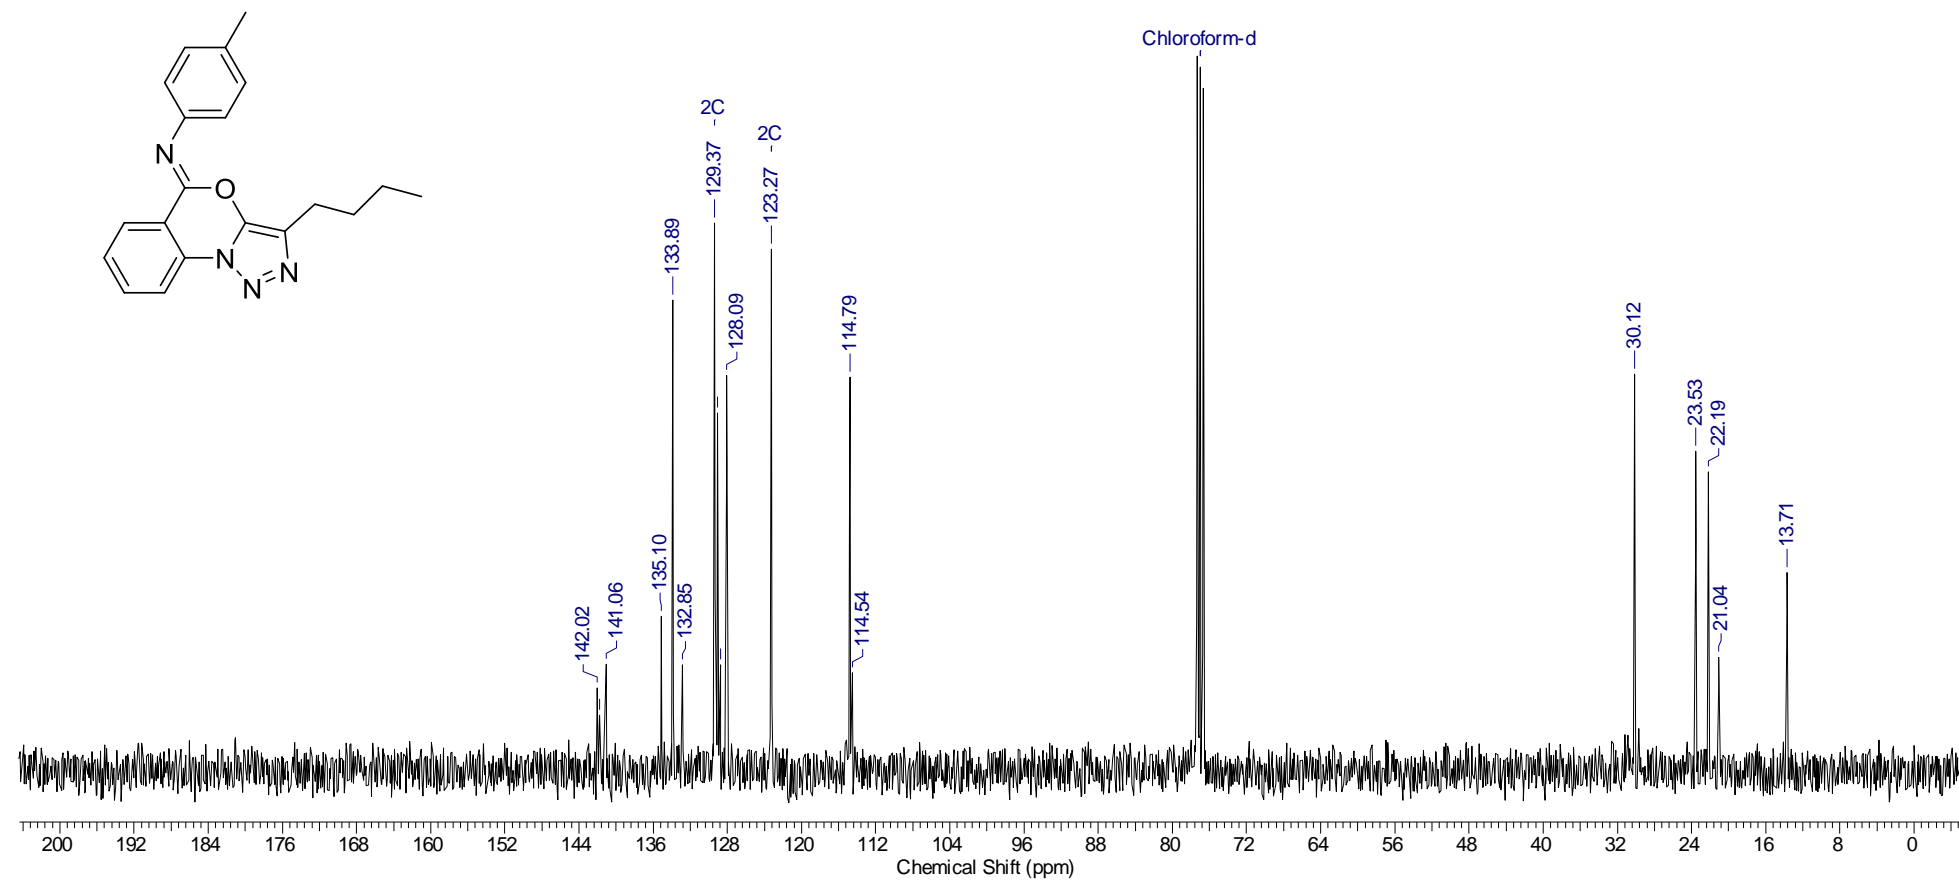

**3-Butyl-N-(4-methoxyphenyl)-5H-[1,2,3]triazolo[1,5-a][3,1]benzoxazin-5-imine (3r)**

<sup>1</sup>H NMR (400 MHz, CDCl<sub>3</sub>)

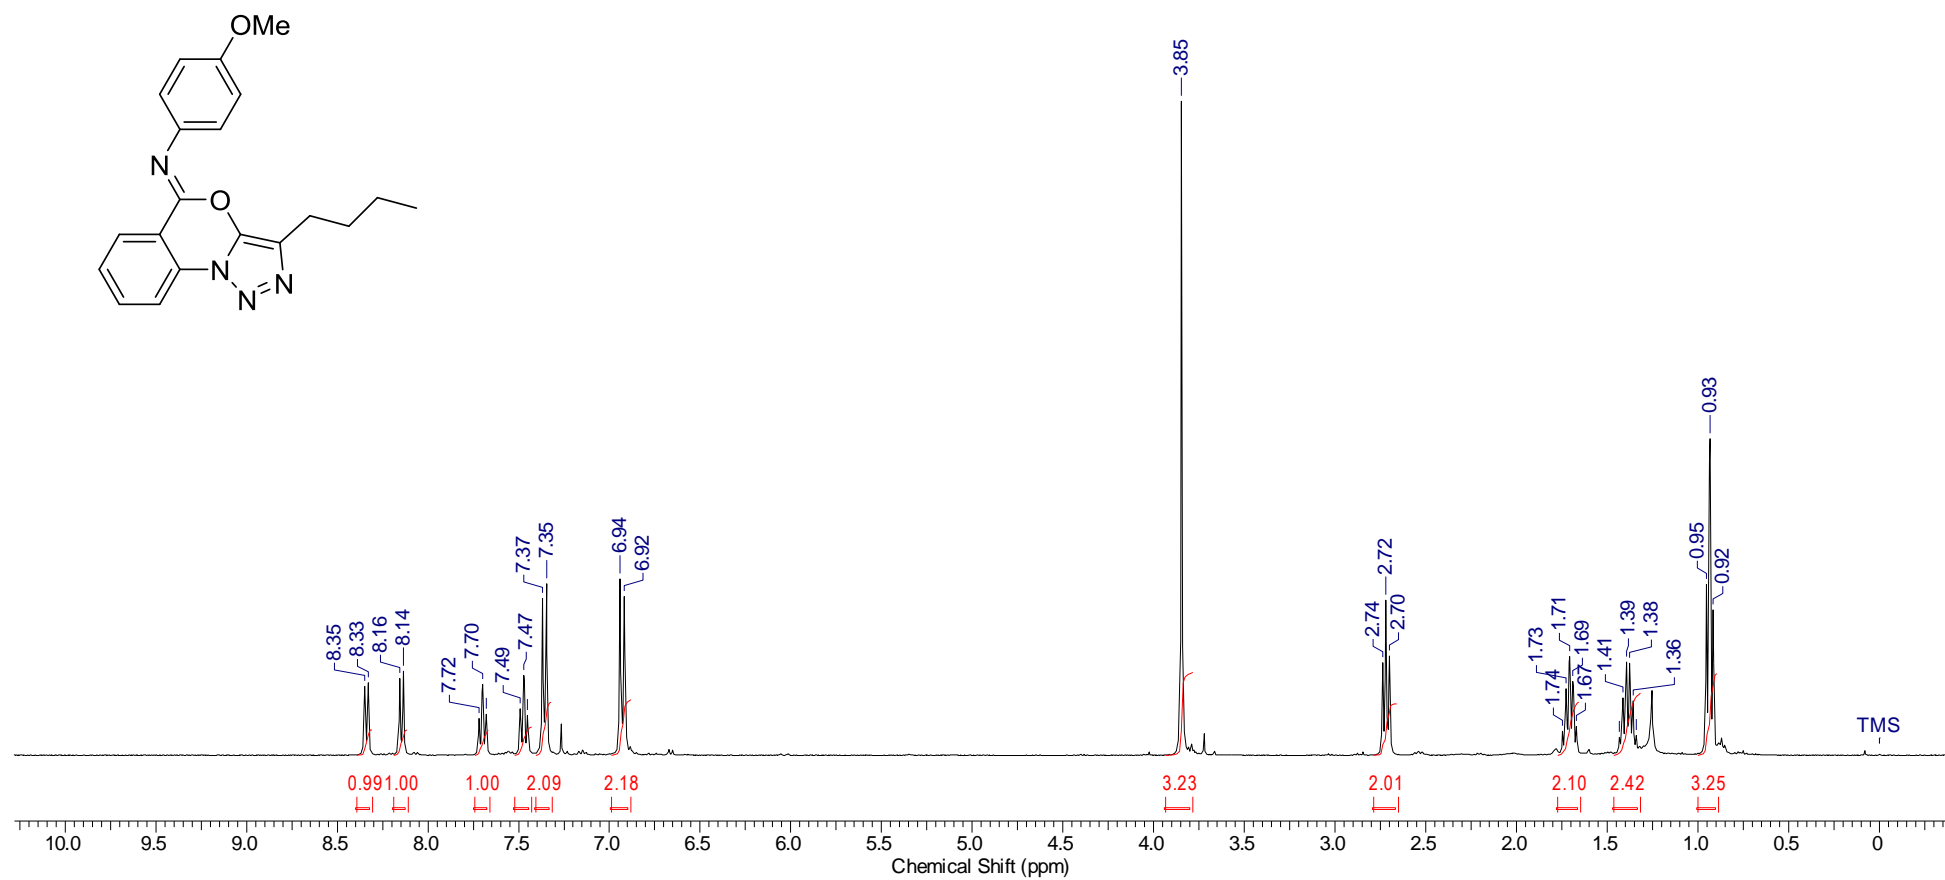



**3-Butyl-N-(4-methoxyphenyl)-5H-[1,2,3]triazolo[1,5-a][3,1]benzoxazin-5-imine (3r)**

$^{13}\text{C}\{^1\text{H}\}$  NMR (100 MHz,  $\text{CDCl}_3$ )

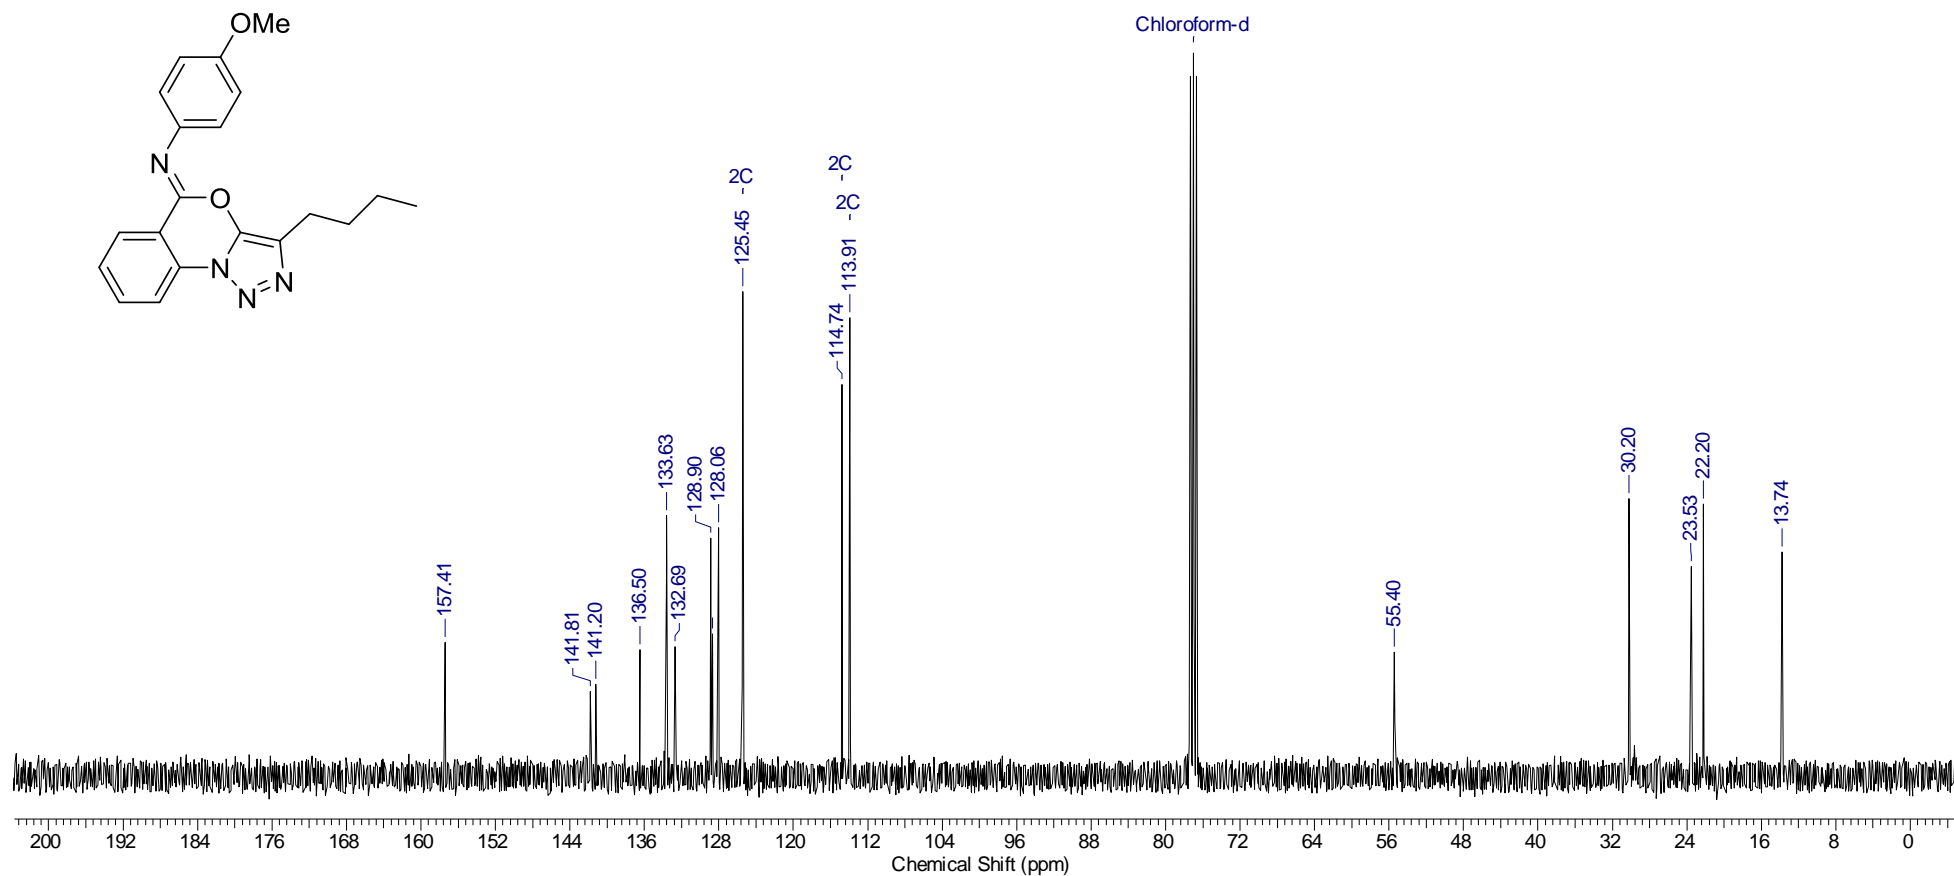

**3-Butyl-N-cyclopropyl-5H-[1,2,3]triazolo[1,5-a][3,1]benzoxazin-5-imine (3s)**

<sup>1</sup>H NMR (400 MHz, CDCl<sub>3</sub>)

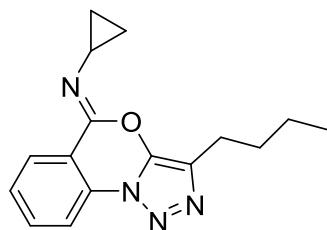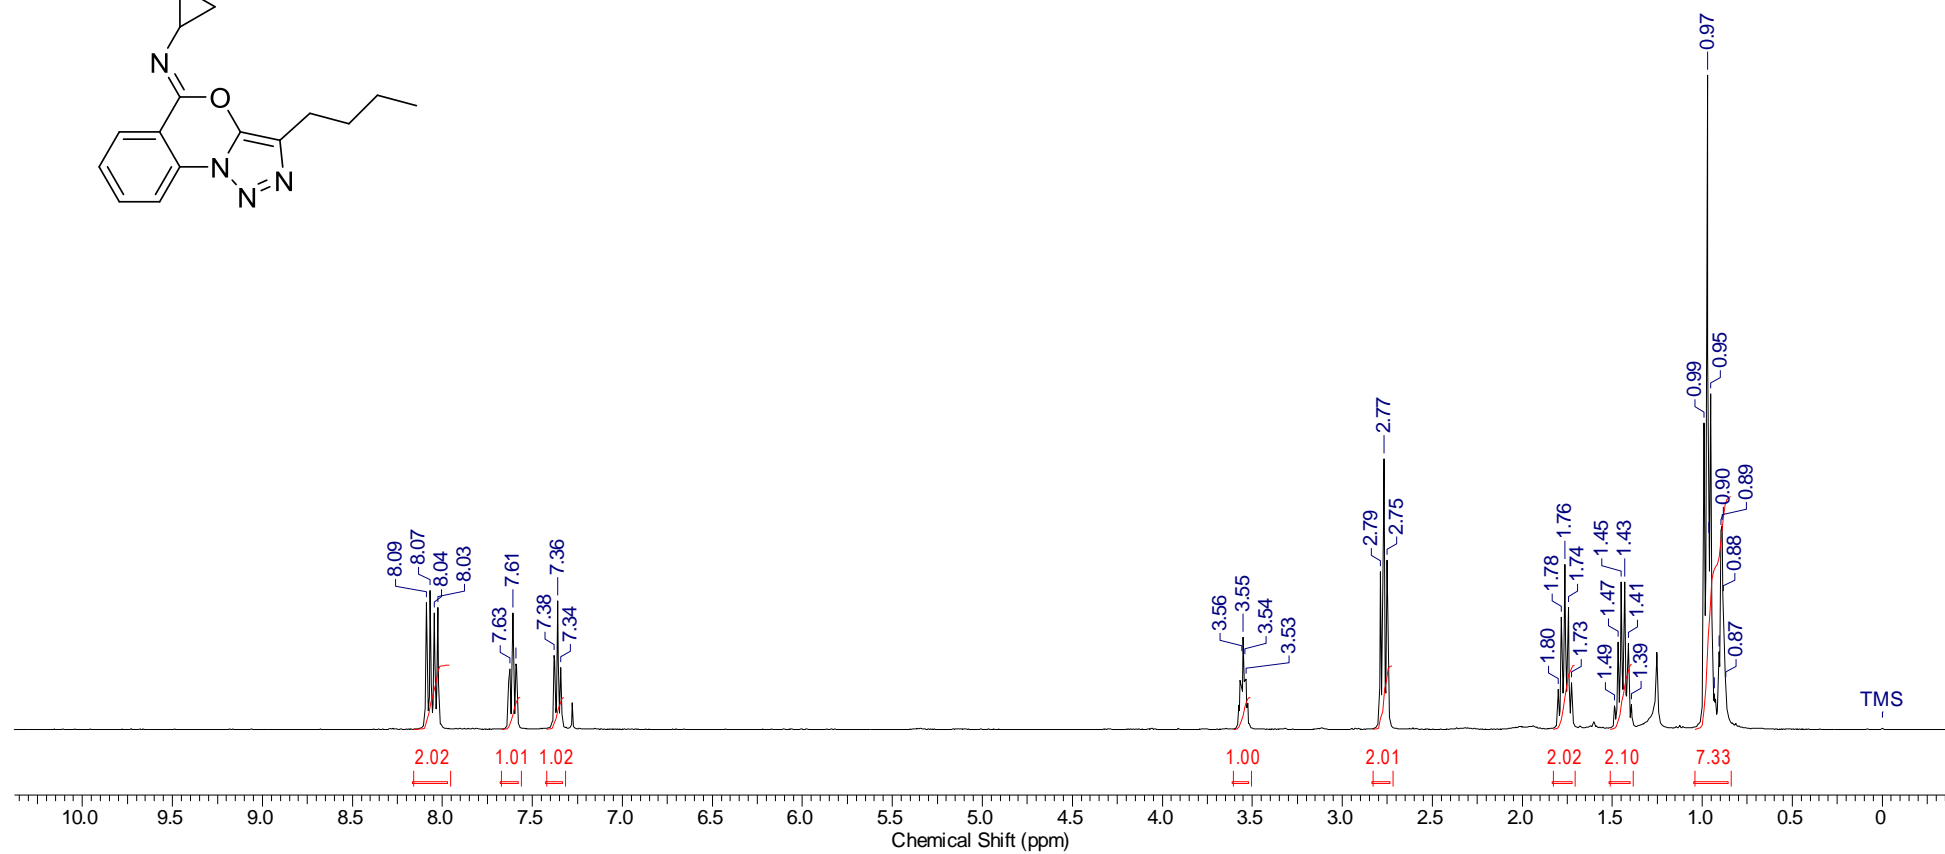

**3-Butyl-N-cyclopropyl-5H-[1,2,3]triazolo[1,5-a][3,1]benzoxazin-5-imine (3s)**

$^{13}\text{C}\{^1\text{H}\}$  NMR (100 MHz,  $\text{CDCl}_3$ )

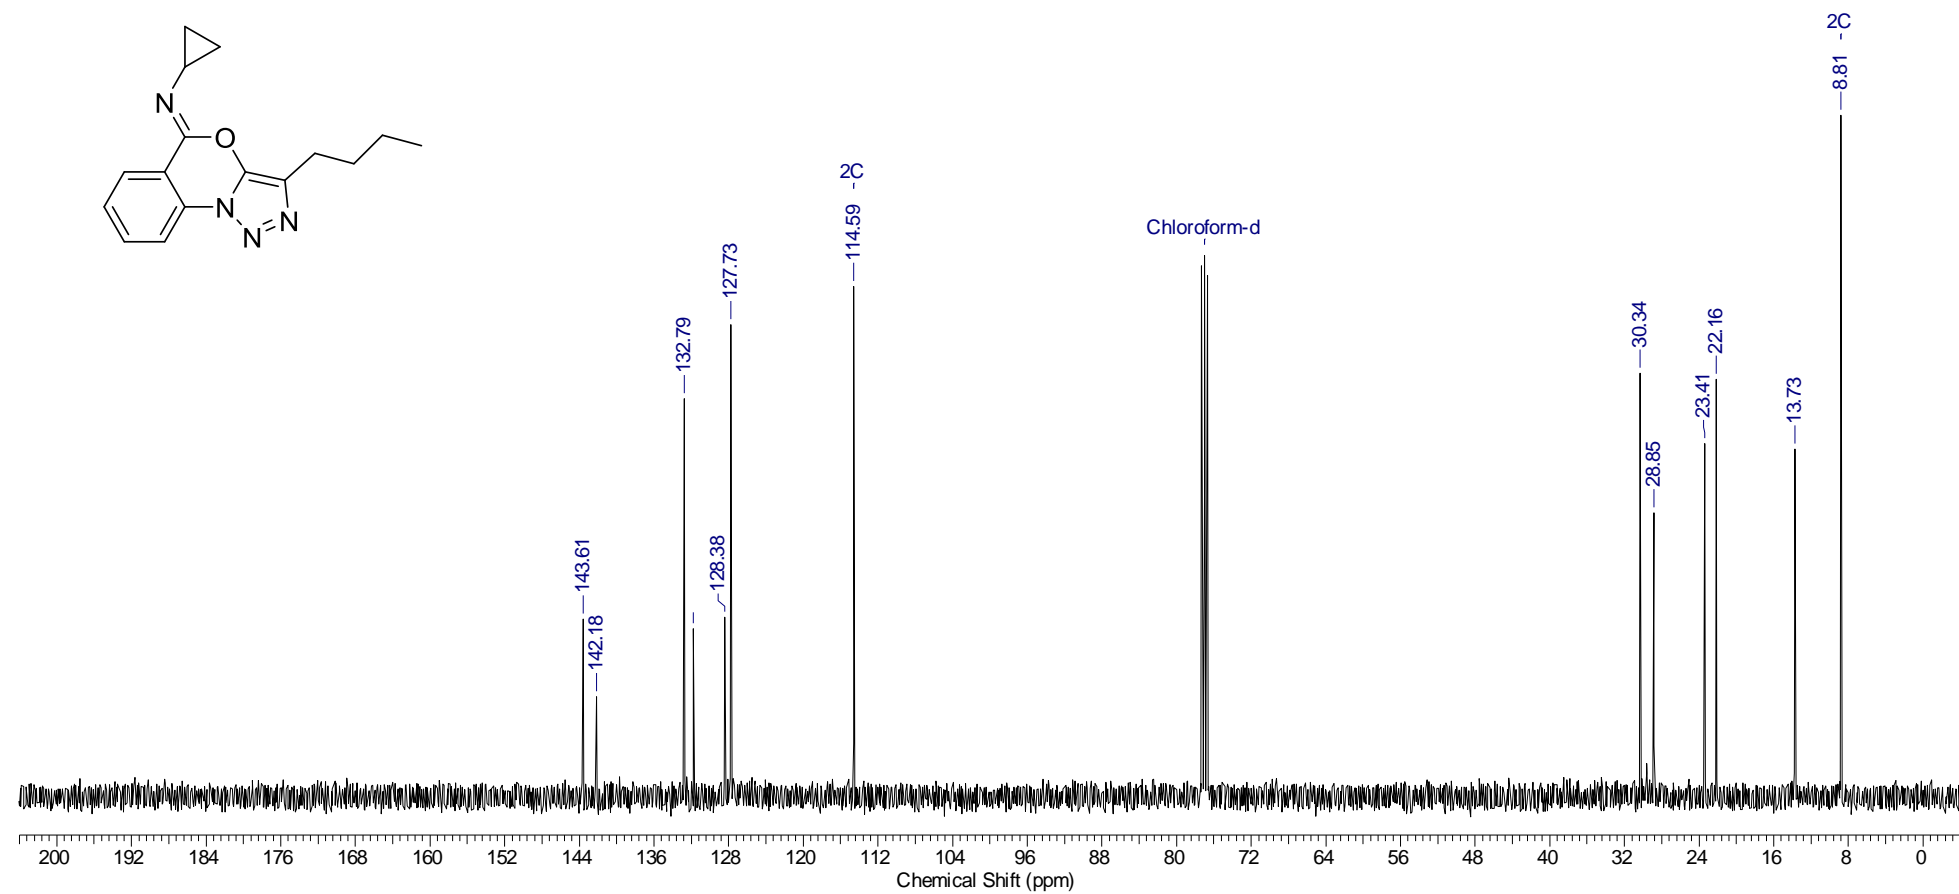

3-Butyl-N-cyclohexyl-5H-[1,2,3]triazolo[1,5-a][3,1]benzoxazin-5-imine (3t)

<sup>1</sup>H NMR (400 MHz, CDCl<sub>3</sub>)

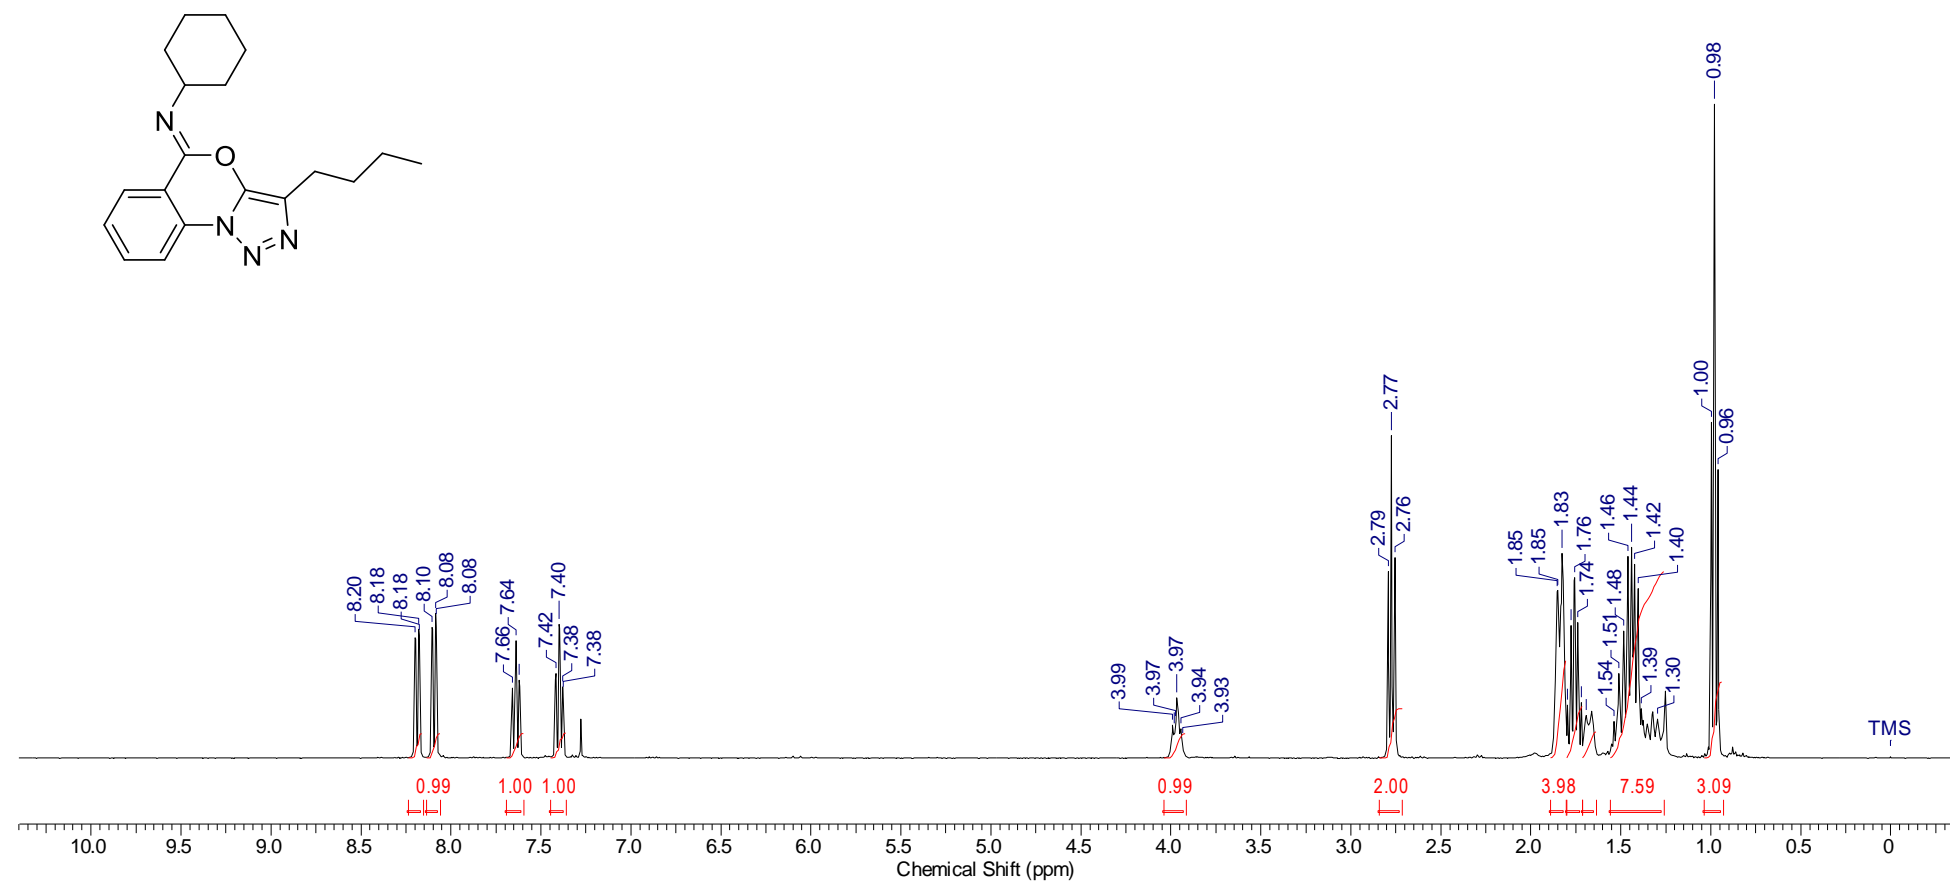

**3-Butyl-N-cyclohexyl-5H-[1,2,3]triazolo[1,5-a][3,1]benzoxazin-5-imine (3t)**

$^{13}\text{C}\{^1\text{H}\}$  NMR (100 MHz,  $\text{CDCl}_3$ )

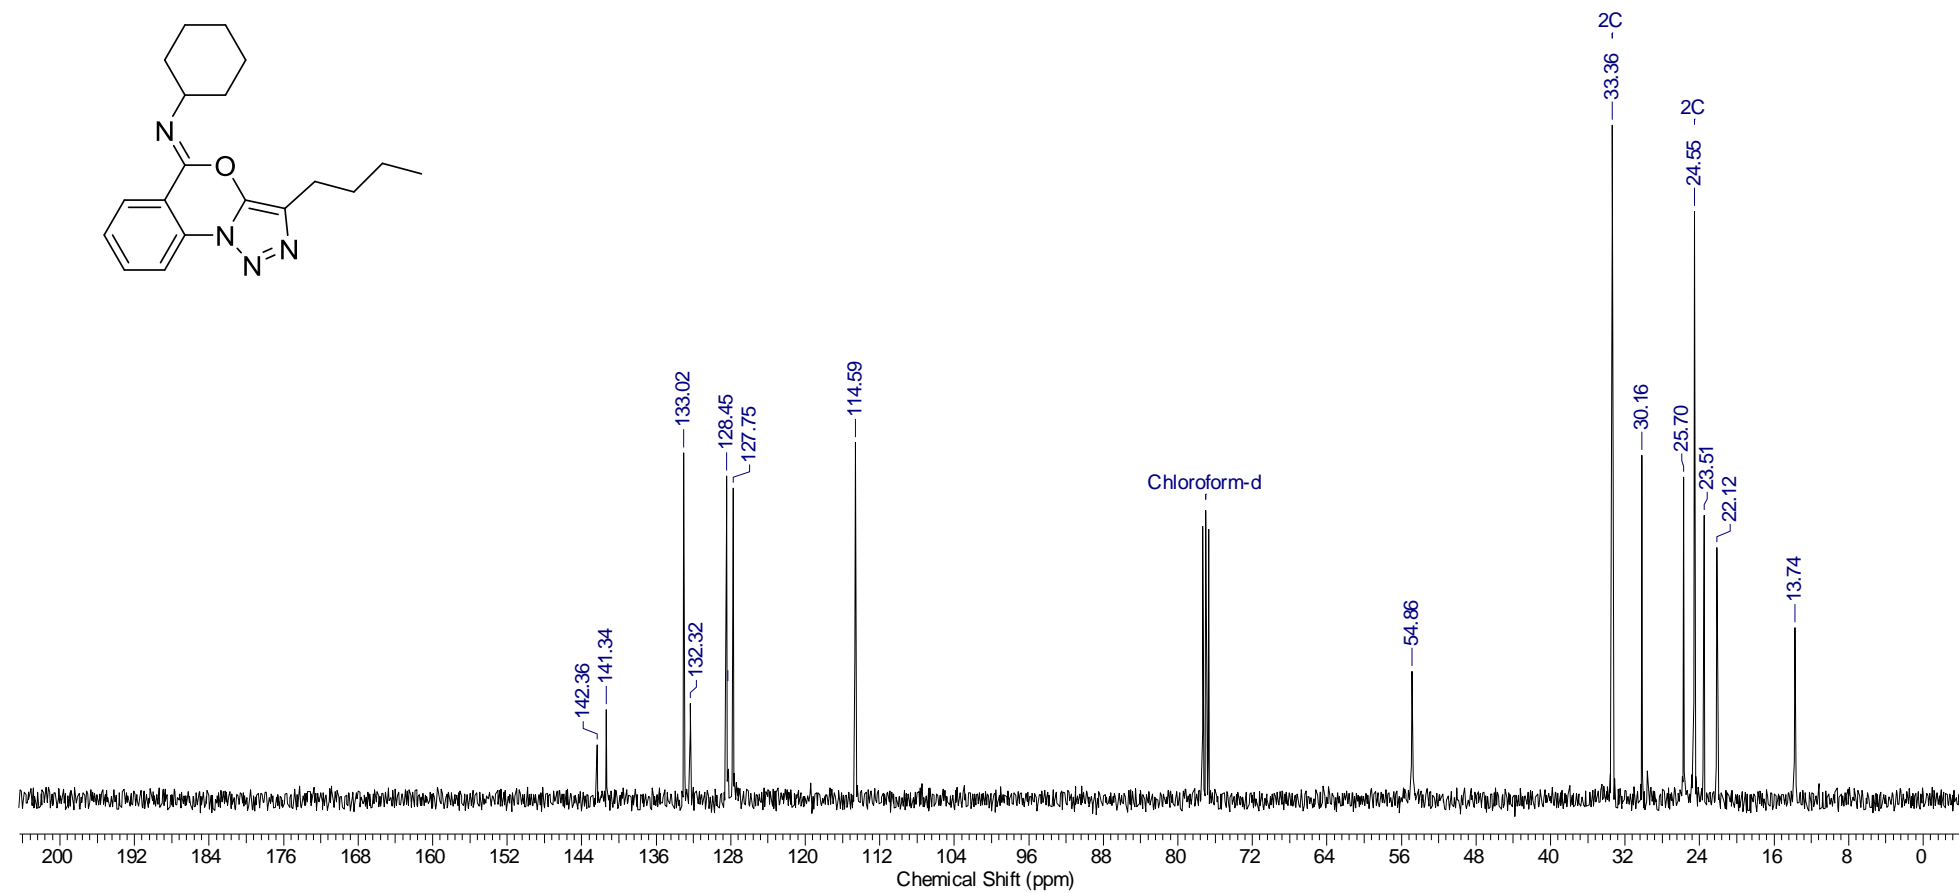

**3-Butyl-N-[2-(5-methoxy-1H-indol-3-yl)ethyl]-5H-[1,2,3]triazolo[1,5-a][3,1]benzoxazin-5-imine (3x)**

<sup>1</sup>H NMR (400 MHz, CDCl<sub>3</sub>)

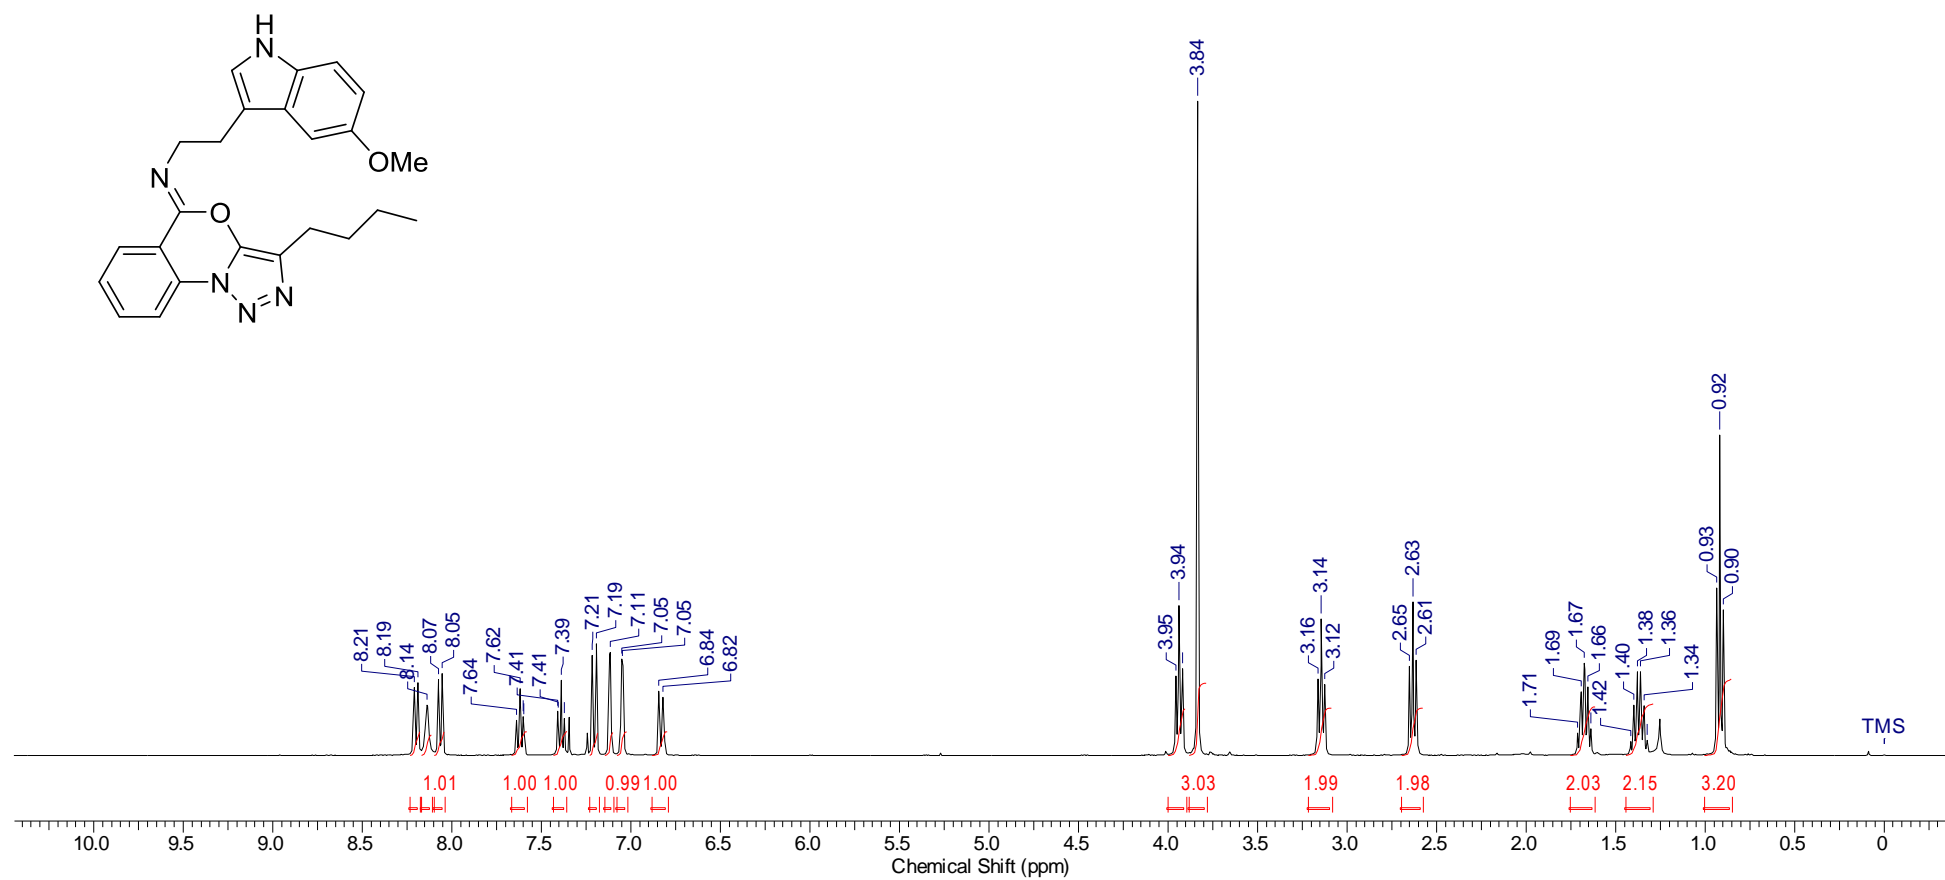

**3-Butyl-N-[2-(5-methoxy-1H-indol-3-yl)ethyl]-5H-[1,2,3]triazolo[1,5-a][3,1]benzoxazin-5-imine (3x)**

$^{13}\text{C}\{^1\text{H}\}$  NMR (100 MHz,  $\text{CDCl}_3$ )

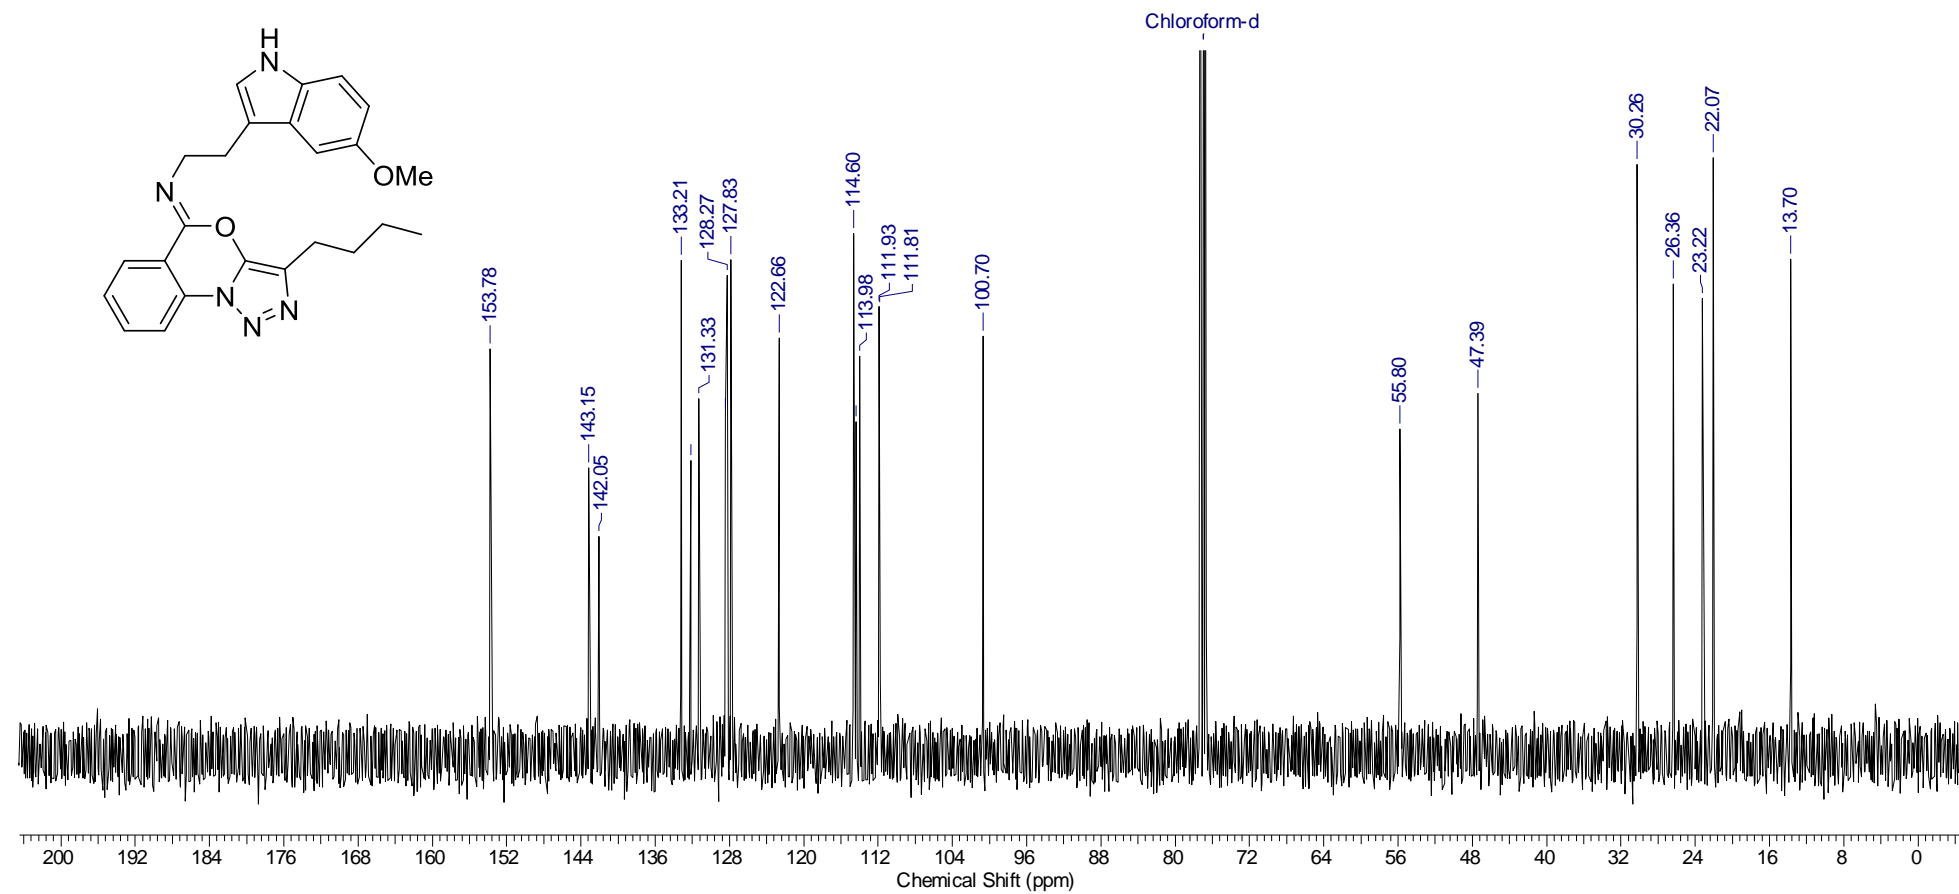

**3-Butyl-N-[2-(3,5-dimethylisoxazol-4-yl)ethyl]-5H-[1,2,3]triazolo[1,5-a][3,1]benzoxazin-5-imine (3y)**

<sup>1</sup>H NMR (400 MHz, CDCl<sub>3</sub>)

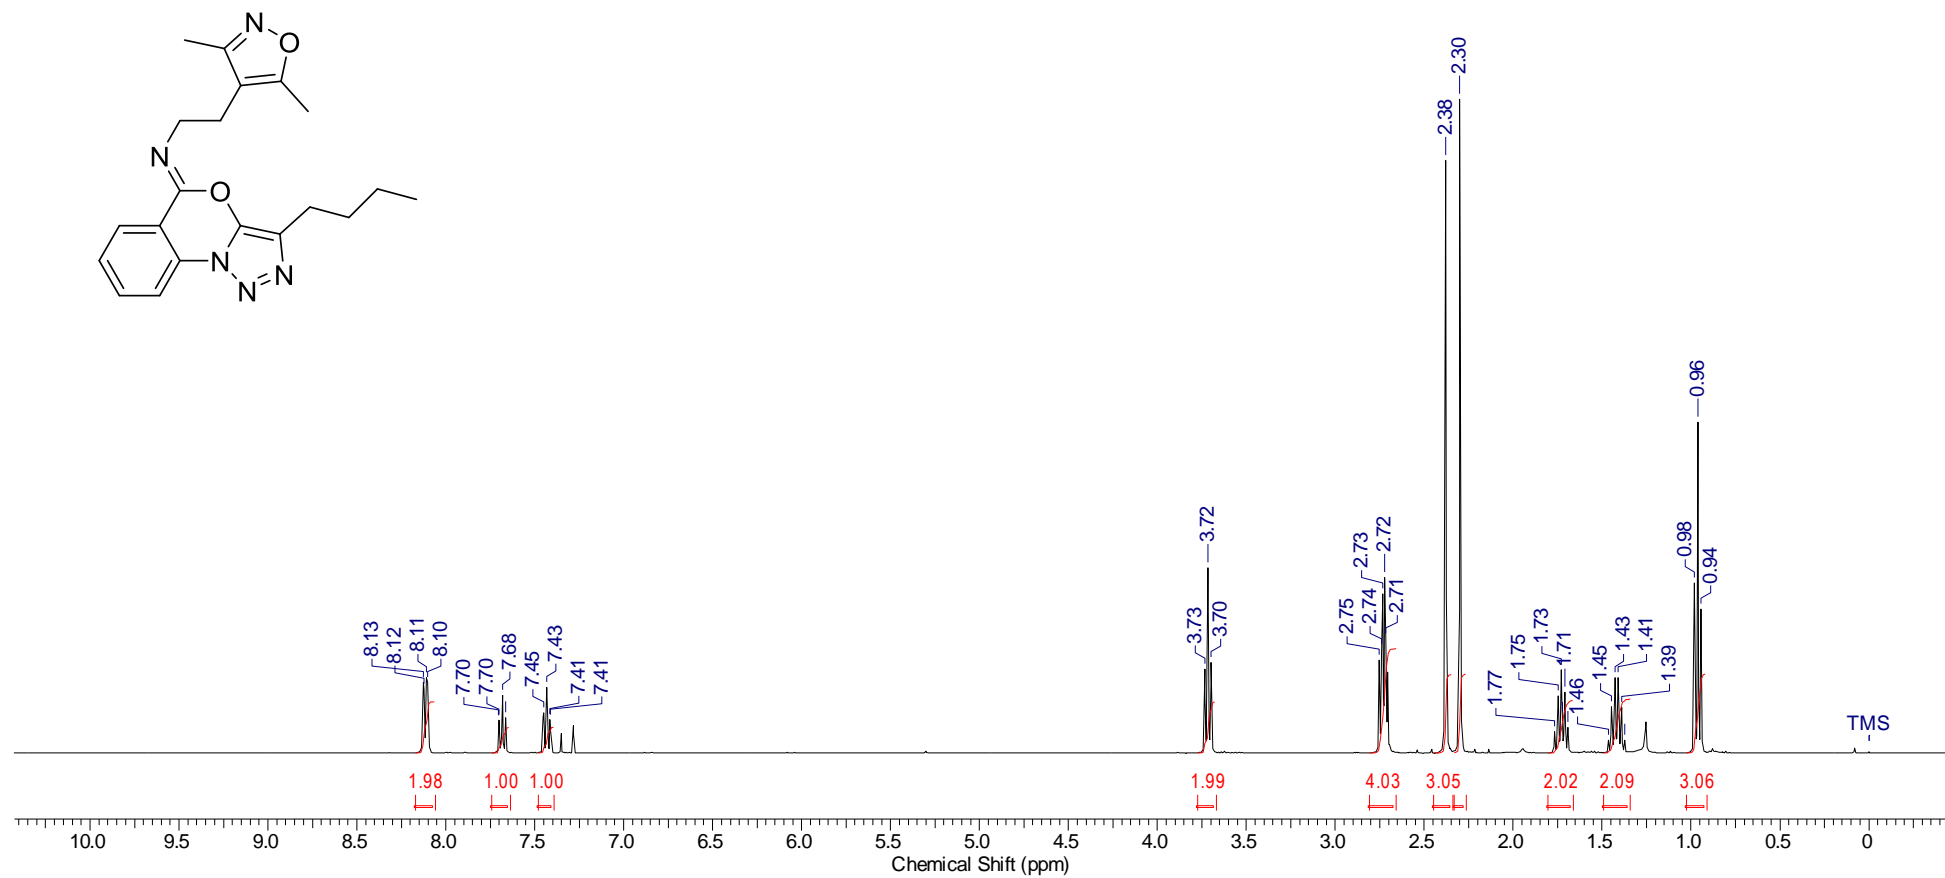



**3-Butyl-N-[2-(3,5-dimethylisoxazol-4-yl)ethyl]-5H-[1,2,3]triazolo[1,5-a][3,1]benzoxazin-5-imine (3y)**

$^{13}\text{C}\{^1\text{H}\}$  NMR (100 MHz,  $\text{CDCl}_3$ )

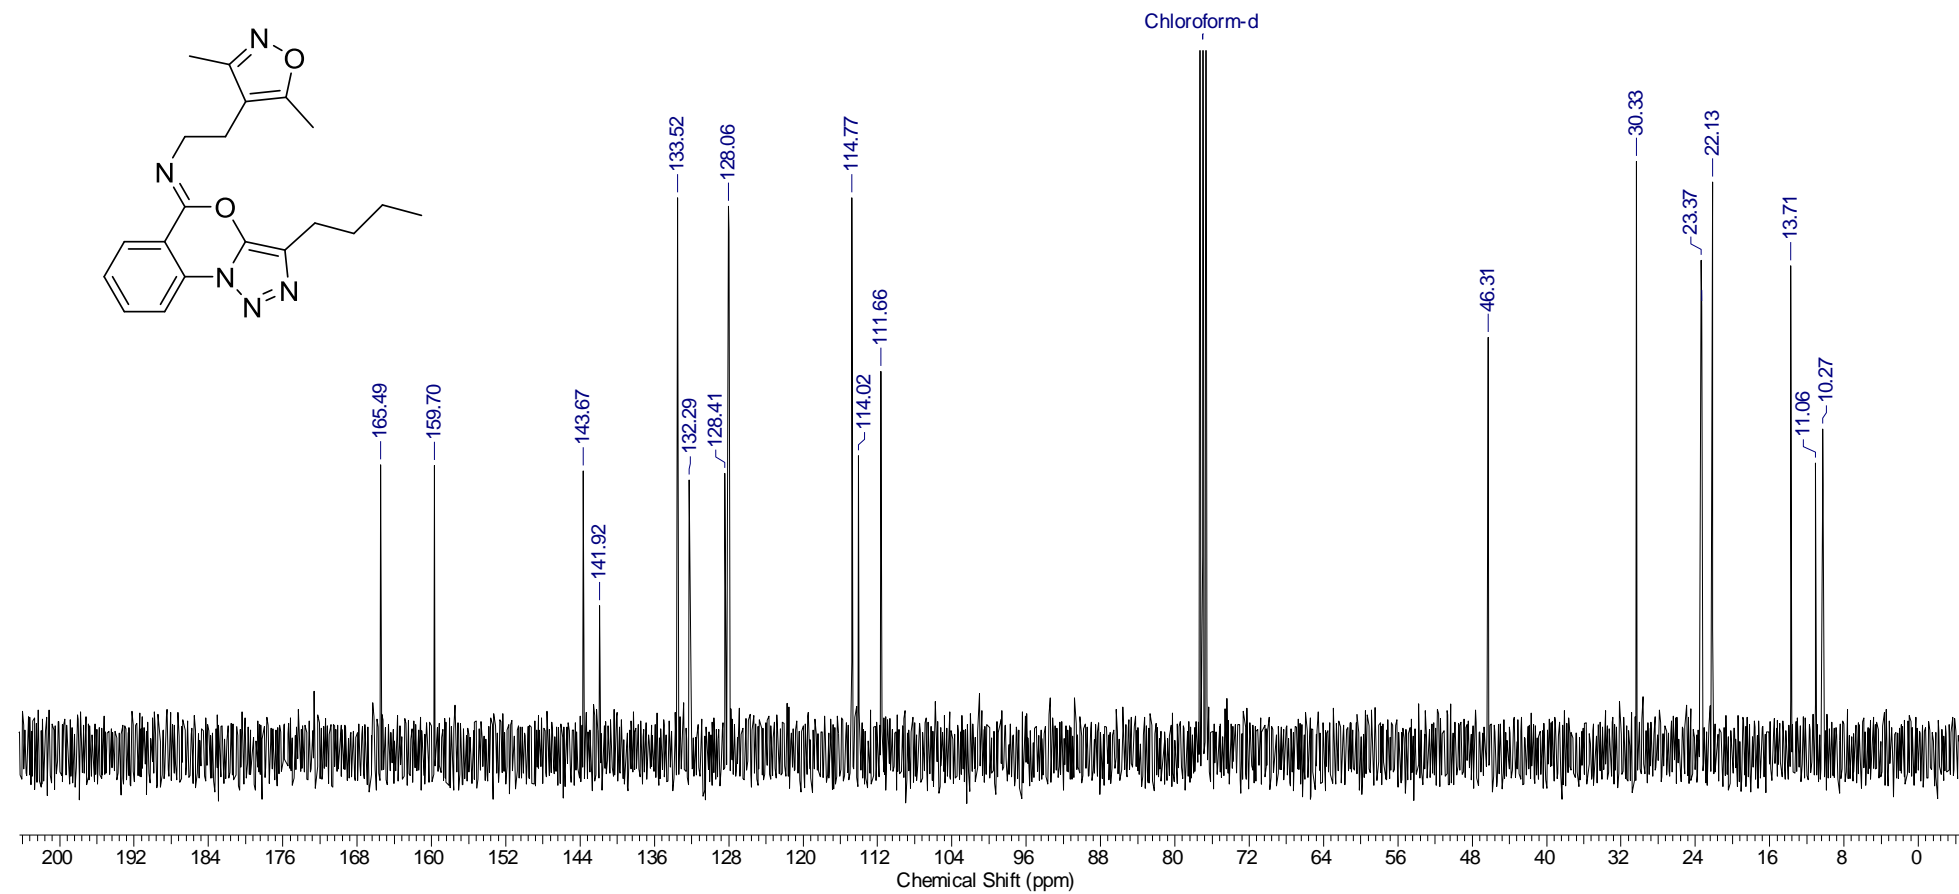

**3-Butyl-N-tert-butyl-5H-[1,2,3]triazolo[1,5-a][3,1]benzoxazin-5-imine (3z)**

<sup>1</sup>H NMR (400 MHz, CDCl<sub>3</sub>)

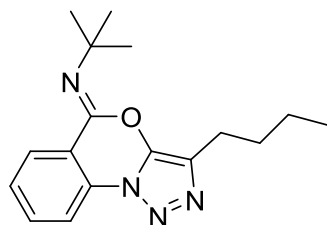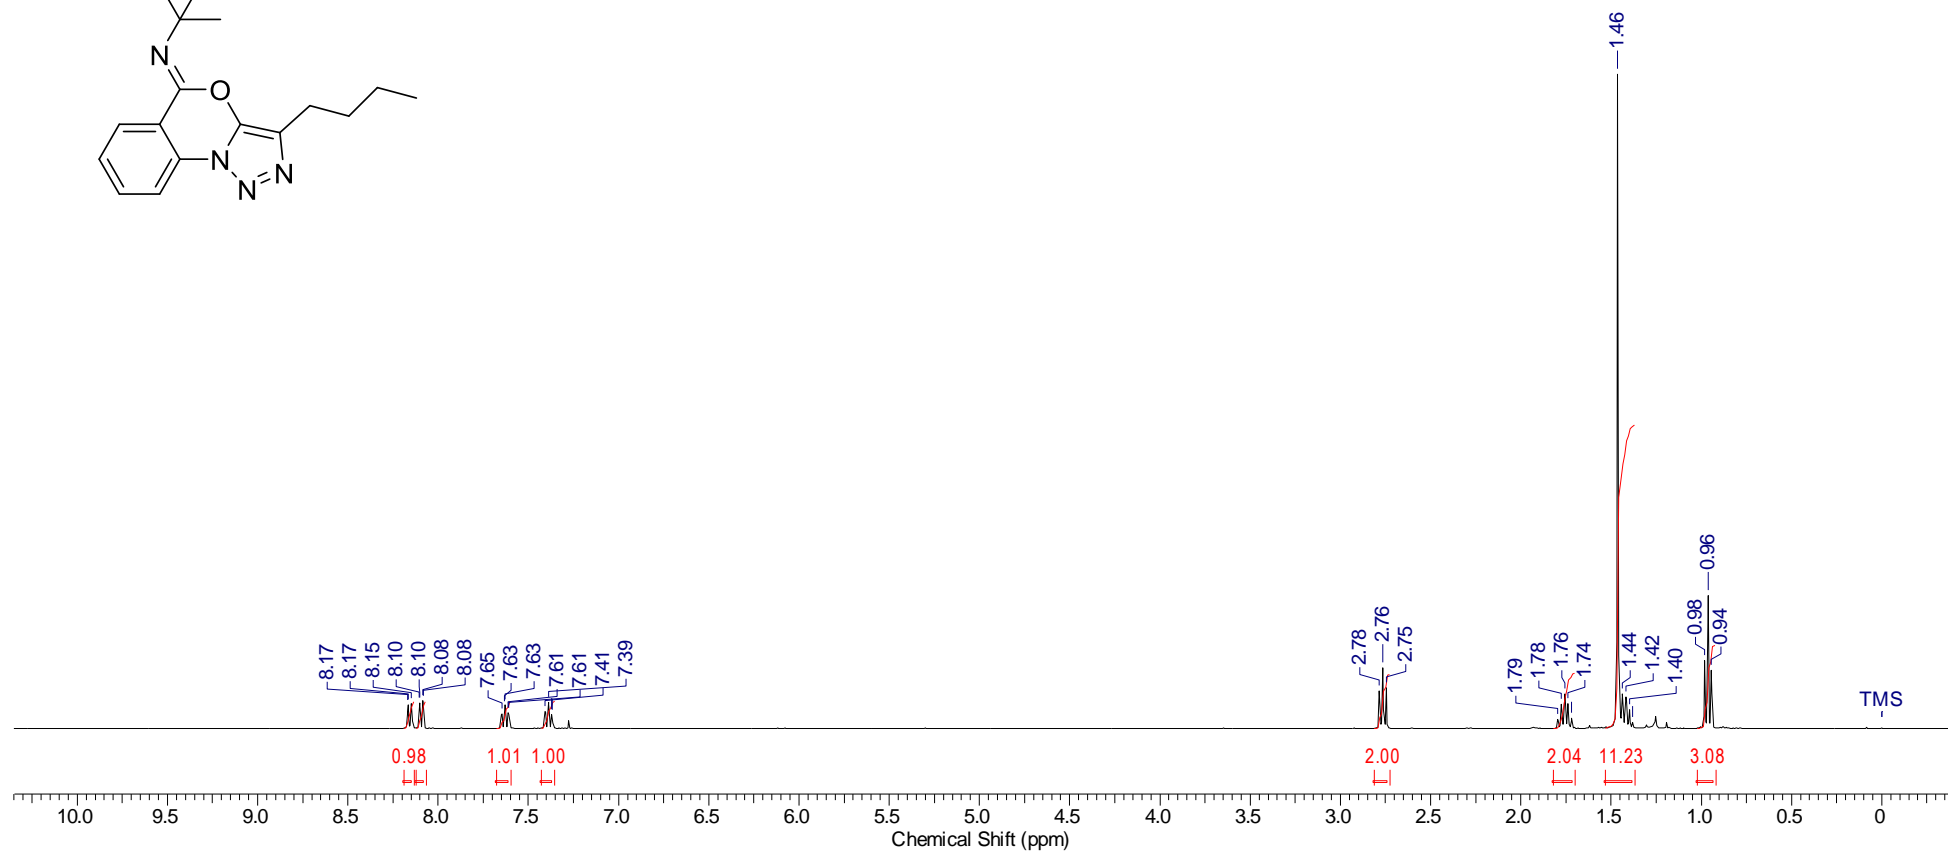

**3-Butyl-*N*-*tert*-butyl-5*H*-[1,2,3]triazolo[1,5-*a*][3,1]benzoxazin-5-imine (3z)**

$^{13}\text{C}\{^1\text{H}\}$  NMR (100 MHz,  $\text{CDCl}_3$ )

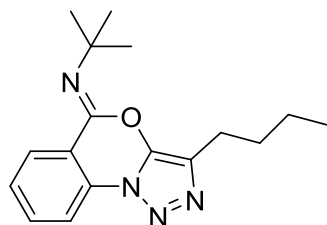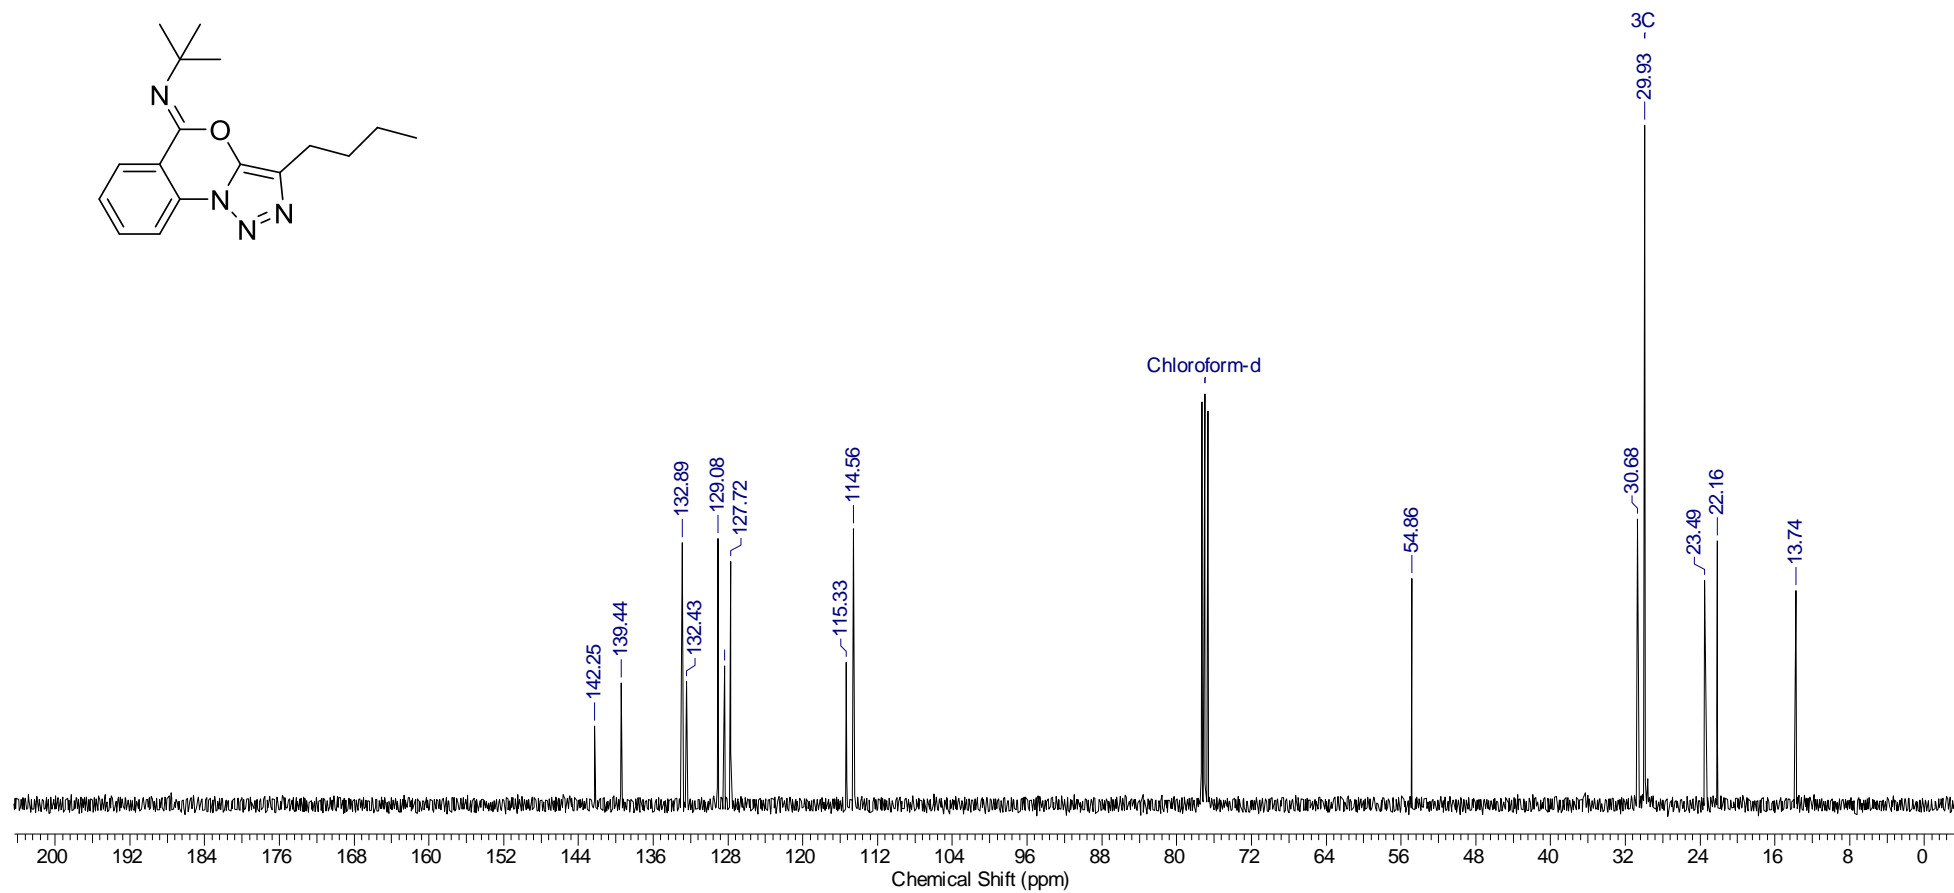

**3-Butyl-N-[(3 $\alpha$ ,5 $\beta$ ,12 $\alpha$ )-3,12-dihydroxycholan-24-yl]-5H-[1,2,3]triazolo[1,5-*a*][3,1]benzoxazin-5-imine (3ab)**

<sup>1</sup>H NMR (400 MHz, CDCl<sub>3</sub>)

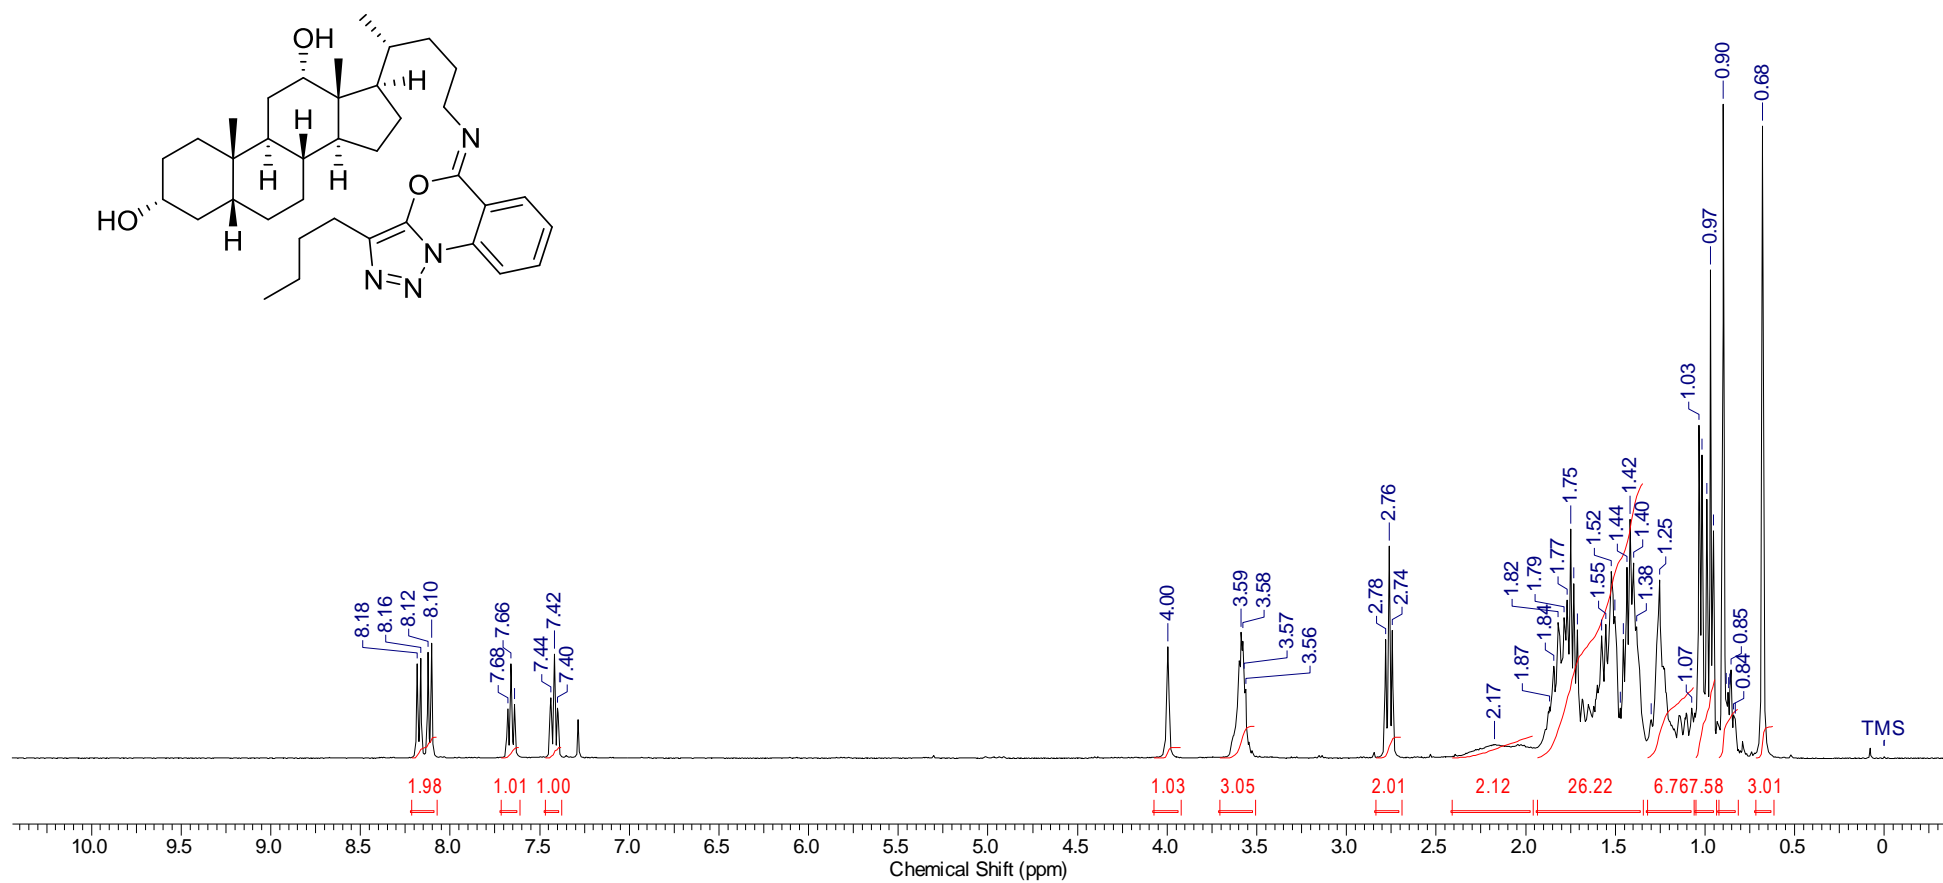

**3-Butyl-N-[(3 $\alpha$ ,5 $\beta$ ,12 $\alpha$ )-3,12-dihydroxycholan-24-yl]-5H-[1,2,3]triazolo[1,5-a][3,1]benzoxazin-5-imine (3ab)**

$^{13}\text{C}\{^1\text{H}\}$  NMR (100 MHz,  $\text{CDCl}_3$ )

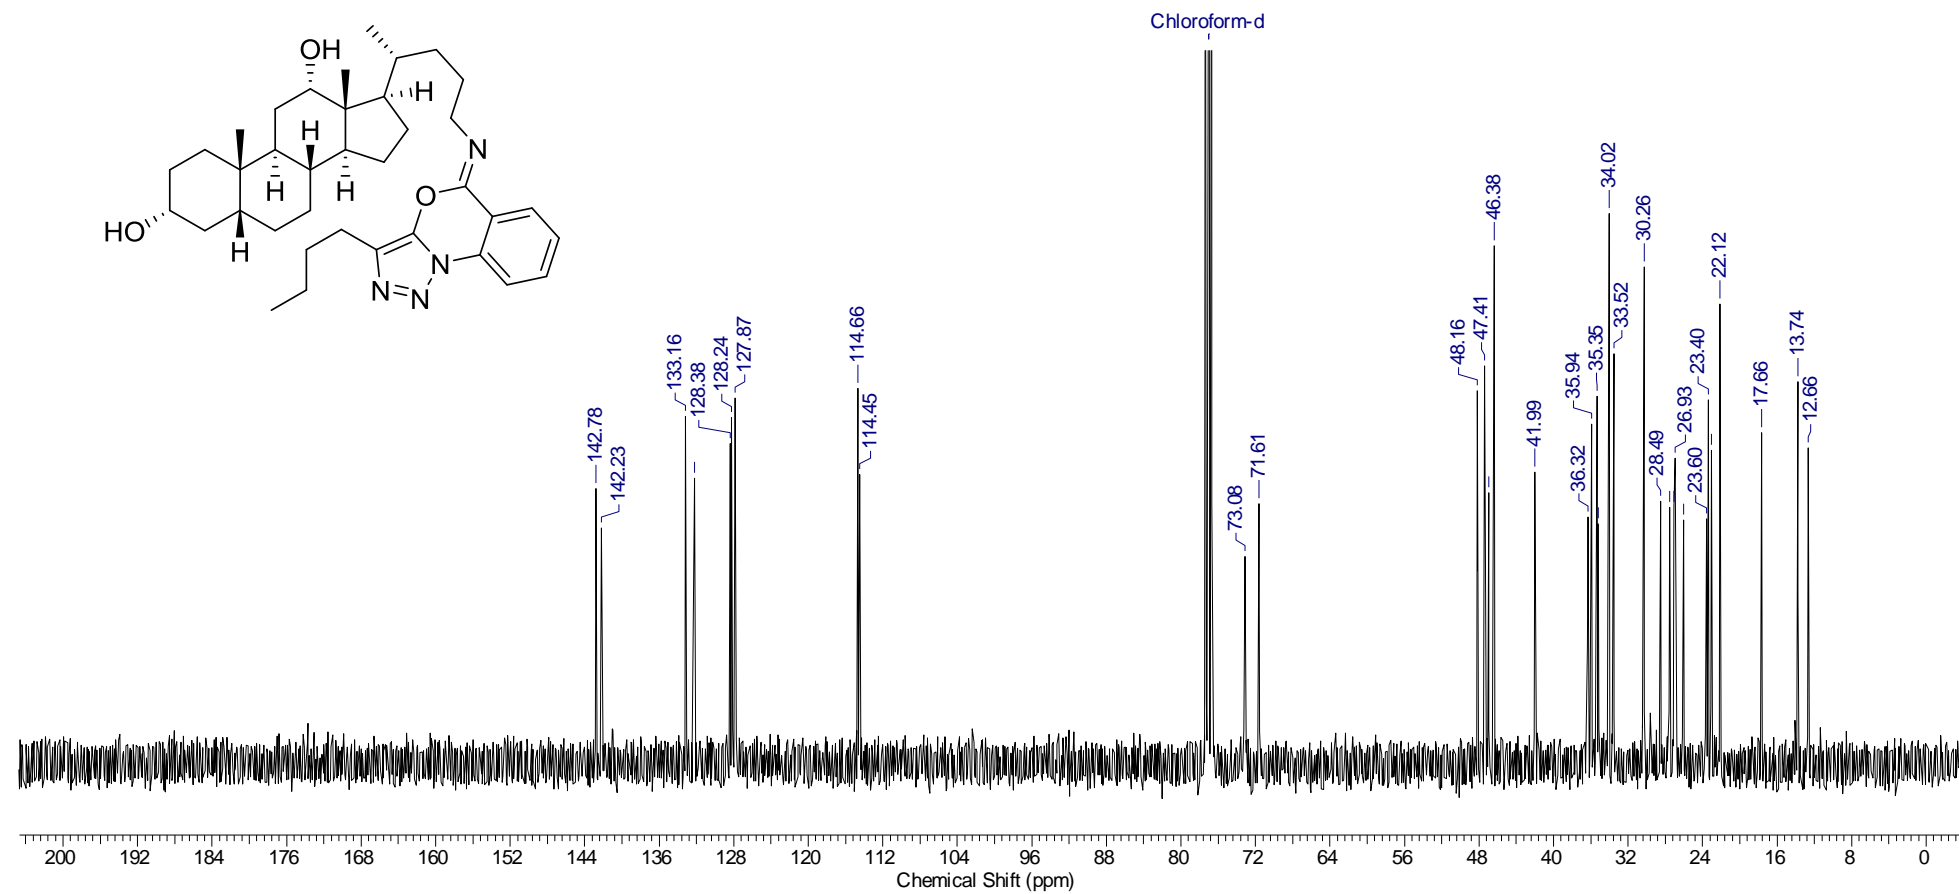

## References

- <sup>1</sup> Xu, W.; Chen, Q.-Y. *J. Org. Chem.* **2002**, *67*, 9421.
- <sup>2</sup> Mader, S.; Molinari, L.; Rudolph, M.; Rominger, F.; Hashmi, A. S. K. *Chem. Eur. J.* **2015**, *21*, 3910.
- <sup>3</sup> Mair, A. C.; Stevens, M. F. G. *J. Chem. Soc., C* **1971**, 2317.
- <sup>4</sup> Voloshkin, V. A.; Kotovshchikov, Y. N.; Latyshev, G. V.; Lukashev, N. V.; Beletskaya, I. P. *J. Org. Chem.* **2022**, *87*, 7064.
- <sup>5</sup> Lukashev, N. V.; Grabovyi, G. A.; Erzunov, D. A.; Kazantsev, A. V.; Latyshev, G. V.; Averin, A. D.; Beletskaya, I. P. *Beilstein J. Org. Chem.* **2017**, *13*, 564.
- <sup>6</sup> Tennant, G. *J. Chem. Soc. C*, **1966**, 2290.
- <sup>7</sup> Sheldrick, G. M. *Acta Crystallogr.* **2008**, *A64*, 112.
- <sup>8</sup> Dolomanov, O. V.; Bourhis, L. J.; Gildea, R. J.; Howard, J. A. K.; Puschmann, H. *J. Appl. Cryst.* **2009**, *42*, 339.
- <sup>9</sup> (a) Neese, F. *WIREs Comput. Mol. Sci.* **2012**, *2*, 73. (b) Neese, F.; Wennmo, F.; Becker, U.; Riplinger, C. *J. Chem. Phys.* **2020**, *152*, 224108. (c) Neese, F. *WIREs Comput. Mol. Sci.* **2022**, *12*, e1606.
- <sup>10</sup> (a) Stephens, P. J.; Devlin, F. J.; Chabalowski, C. F.; Frisch, M. J. *J. Phys. Chem.* **1994**, *98*, 11623. (b) Becke, A. D. *J. Chem. Phys.* **1993**, *98*, 5648.
- <sup>11</sup> (a) Weigend, F.; Ahlrichs, R. *Phys. Chem. Chem. Phys.* **2005**, *7*, 3297. (b) Zheng, J.; Xu, X.; Truhlar, D. G. *Theor. Chem. Acc.* **2011**, *128*, 295.
- <sup>12</sup> (a) Barone, V.; Cossi, M. *J. Phys. Chem. A* **1998**, *102*, 1995. (b) Cossi, M.; Rega, N.; Scalmani, G.; Barone, V. *J. Comput. Chem.* **2003**, *24*, 669.
- <sup>13</sup> Grimme, S. *Chem. Eur. J.* **2012**, *18*, 9955.
- <sup>14</sup> CYLview, 1.0b; C. Y. Legault, Université de Sherbrooke, 2009, <http://www.cylview.org>.
